# Supplementary material for: A hiPSC-derived lineage-specific vascular smooth muscle cell-on-a-chip identifies aortic heterogeneity across segments
Source: Royal Society of Chemistry journal article supplement (doi:10.1039/d2lc01158a), 2023-01-01
Supplement: d2lc01158a2.pdf [file d2lc01158a2.pdf]

**Supplementary Table 1. Primers used for RT-qPCR.**

| <b>Primers</b> | <b>Forward primer</b>   | <b>Reverse Primer</b>   |
|----------------|-------------------------|-------------------------|
| SM22           | CCGTGGAGATCCCAACTGG     | CCATCTGAAGGCCAATGACAT   |
| IL-6           | ACTCACCTCTTCAGAACGAATTG | ACTCACCTCTTCAGAACGAATTG |
| MMP9           | TGTACCGCTATGGTTACTACTCG | TGTACCGCTATGGTTACTACTCG |
| Bax            | GCGAATTGGAGATGAACTGG    | GTGAGCGAGGCGGTGAGGAC    |
| Caspase-3      | AAGCCGAACTCTTCATCAT     | CACTCCCAGTCATTCTTTA     |
| GAPDH          | CTGGGCTACTACTGAGCACC    | AAGTGGTCGTTGAGGGCAATG   |

**Supplementary Table 2. Reagents and antibodies used for western blot and immunohistochemistry.**

| <b>Antibody</b> | <b>Company (Cat. No.)</b> | <b>Working dilutions</b> |
|-----------------|---------------------------|--------------------------|
| mTeSR1          | Stem cell technology      |                          |
| TesRE8          | Stem cell technology      |                          |
| Accutase        | Stem cell technology      |                          |
| DMEM            | Gibco                     |                          |
| IMDM            | Gibco                     |                          |
| F12             | Gibco                     |                          |
| Glutamax        | Life Technologies         | 2mM                      |
| PVA             | Sigma-Aldrich             | 1mg/ml                   |
| Insulin         | Roche Diagnostics         | 7 µg/ml                  |

|                     |                        |           |
|---------------------|------------------------|-----------|
| Transferrin         | Roche Diagnostics      | 15 µg/ml  |
| Monothioglycerol    | Sigma-Aldrich          | 450 µM    |
| Activin A           | Peprotech              | 30 ng/ml  |
| BMP4                | Peprotech              | 40 ng/ml  |
| CHIR99021           | Selleck                | 6 µM      |
| FGF2                | Peprotech              | 20 ng/ml  |
| PIK90               | Selleck                | 100 nM    |
| A83-01              | Selleck                | 1 µM      |
| C59                 | Selleck                | 1 µM      |
| PDGF-BB             | Peprotech              | 10 ng/ml  |
| TGF β               | Peprotech              | 2 ng/ml   |
| Y27632              | Selleck                | 10 µM     |
| 1XN2<br>supplement  | Life Technologies      |           |
| SB431542            | Selleck                | 10 µM     |
| LDN193189           | Selleck                | 1 µM      |
| 1XB27<br>supplement | Life Technologies      |           |
| Ascorbic acid       | Sigma                  | 50 µg/ml  |
| 1-thioglycerol      | Sigma                  | 400 µM    |
| SOX2                | Cell signaling (#3579) | IF: 1/100 |

|                       |                                      |                     |
|-----------------------|--------------------------------------|---------------------|
| NANOG                 | Cell signaling (#4903)               | IF: 1/100           |
| SSEA4                 | Cell signaling (#4755)               | IF: 1/100           |
| TRA181                | Cell signaling (#4745)               | IF: 1/100           |
| SSEA4<br>(FACS)       | Biologend (330408)                   | IF: 1/100           |
| SSEA3<br>(FACS)       | Biologend (330306)                   | IF: 1/100           |
| NKX2.5                | Invitrogen (#701622)                 | IF: 1/100           |
| PAX6                  | Biologend (#901301)                  | IF: 1/100           |
| MEOX1                 | Invitrogen (#PA5-96640)              | IF: 1/100           |
| Calponin              | Sigma (C2687)                        | IF: 1/200           |
| Nestin                | BD (611659)                          | IF: 1/200           |
| SM22                  | Abcam (ab14106)                      | WB:1/1000 IF: 1/500 |
| Cleaved-casepase<br>3 | Cell Signaling TECHNOLOGY<br>(9964S) | WB:1/1000           |
| MMP9                  | Abcam (ab58803)                      | WB:1/1000           |
| Bax                   | Proteintech (60267-1-Ig)             | WB:1/1000           |
| LY294002              | Sigma-Aldrich, #440202               | 30µm                |
| PI3K                  | (CST, #4249, Boston, USA)            | WB:1/1000           |
| phospho-PI3K          | (CST, #4228, Boston, USA)            | WB:1/1000           |
| Akt                   | (CST, #4691, Boston, USA)            | WB:1/1000           |

---

|             |                           |           |
|-------------|---------------------------|-----------|
| phospho-Akt | (CST, #4060, Boston, USA) | WB:1/1000 |
|-------------|---------------------------|-----------|

---

|       |                |           |
|-------|----------------|-----------|
| GAPDH | Abcam (ab8245) | WB:1/6000 |
|-------|----------------|-----------|

---

|                |                         |           |
|----------------|-------------------------|-----------|
| $\beta$ -actin | Proteintech (HRP-60008) | WB:1/6000 |
|----------------|-------------------------|-----------|

---

|                    |                        |          |
|--------------------|------------------------|----------|
| Alexa Fluor 488    | Jackson ImmunoResearch |          |
| Donkey anti Rabbit | (711-545-152)          | IF:1/500 |

---

|                   |                        |          |
|-------------------|------------------------|----------|
| Alexa Fluor 488   | Jackson ImmunoResearch |          |
| Donkey anti Mouse | (715-545-150)          | IF:1/500 |

---

|                                |                                                |          |
|--------------------------------|------------------------------------------------|----------|
| Cy <sup>TM</sup> 3 anti Rabbit | Donkey Jackson ImmunoResearch<br>(712-165-150) | IF:1/500 |
|--------------------------------|------------------------------------------------|----------|

---
