# Supplementary material for: A hiPSC-derived lineage-specific vascular smooth muscle cell-on-a-chip identifies aortic heterogeneity across segments
Source: Royal Society of Chemistry journal article supplement (doi:10.1039/d2lc01158a), 2023-01-01
Supplement: d2lc01158a3.xlsx [file d2lc01158a3.xlsx]

## Sheet: Sheet1
cluster	geneID	iPSC1	iPSC3	iPSC2	N_LM1	N_LM2	N_LM3	N_NC1	N_NC2	N_NC3	N_PM1	N_PM2	N_PM3	P_LM1	P_LM2	P_LM3	P_NC1	P_NC2	P_NC3
clust1	ENSG00000111641	-1.96132	-1.50082	0.270217	0.348182	-0.180152	1.74064	-0.68274	0.636501	-0.45752	0.87957	-0.408165	0.253434	-0.349799	-1.02723	0.265871	1.84075	-0.492227	0.824792
clust1	ENSG00000174279	-0.685785	-0.685785	-0.331627	1.66119	-0.359224	-0.0581585	-0.685785	-0.685785	-0.685785	-0.107675	0.148102	0.134342	-0.685785	-0.685785	-0.685785	2.46109	-0.0912407	2.02948
clust1	ENSG00000188761	-1.34807	-1.15571	-0.273471	1.54386	-0.551749	1.436	-0.471887	-0.477418	-0.605685	-0.117008	0.502213	-0.839203	-0.840838	0.610104	-0.437434	1.14371	-0.259508	2.1421
clust1	ENSG00000110324	-0.809699	-0.579899	0.972078	-0.132869	-0.330556	1.66015	-0.177681	-0.598943	-0.363227	-0.809699	-0.809699	-0.20191	-0.606431	-0.809699	-0.809699	2.16327	0.277192	1.96732
clust1	ENSG00000115423	0.825321	-0.897593	-0.378619	-0.177522	-0.278623	0.849388	-1.04565	-1.04565	0.090362	-0.907592	-0.646557	-0.523545	0.113037	-0.925727	-0.202836	2.00863	0.884868	2.2583
clust1	ENSG00000171587	0.135194	0.0692032	-0.226739	-0.65742	0.106199	0.85725	-0.663602	-0.664156	-0.388431	-0.575866	-0.665522	-0.666942	-0.667211	-0.750173	-0.750173	2.11488	0.7764	2.61711
clust1	ENSG00000023697	-1.78347	-0.062725	-0.572991	1.03488	1.03317	0.711431	-0.544287	-1.17629	-0.604128	-0.253894	0.0433758	-0.220304	-1.1602	-0.486035	-0.464476	1.57478	1.69885	1.23232
clust1	ENSG00000081870	-1.19061	-1.38654	-0.894428	0.817009	1.10197	0.824927	-0.424334	-1.04742	-0.864145	-0.211267	-0.122827	0.190185	-0.252893	-0.737435	-0.381556	1.95666	1.59121	1.03149
clust1	ENSG00000166086	-1.25156	-0.862685	-0.997048	0.944612	1.06108	1.07572	-0.718515	-1.36671	-0.0397489	0.208742	-0.0952288	0.358215	-0.664831	-1.03335	-0.763339	1.23567	1.2279	1.6811
clust1	ENSG00000152894	0.210038	-0.770426	-0.606013	1.14967	1.05679	1.03129	-0.483716	-0.941361	-0.489004	-0.155307	-0.352108	-0.364635	-1.21365	-1.32437	-1.11835	1.47986	1.39417	1.49711
clust1	ENSG00000185942	-0.77642	-0.814873	-0.691503	1.43405	1.44389	1.43095	-0.603316	-0.370752	-0.365769	-0.309275	-0.41895	-0.122502	-1.12827	-1.14212	-1.10062	0.832162	1.2831	1.42022
clust1	ENSG00000075303	-0.194334	-0.732446	-1.06521	1.49008	1.45115	1.45485	-0.574148	-1.07941	-0.988299	-0.58859	-0.447593	-0.658465	-0.525496	-0.252001	-0.849471	0.919132	1.36994	1.2703
clust1	ENSG00000213347	-0.606871	-0.550852	-0.766824	1.74426	1.51194	1.46071	-1.35854	-1.12585	-1.12834	-0.188948	-0.282763	-0.105795	-0.625792	-0.209488	-0.626317	1.28627	0.636096	0.937094
clust1	ENSG00000104427	-0.329631	-1.35985	-1.34544	1.5553	0.881017	0.953788	-0.218987	0.0755157	-0.630401	-1.25397	-0.215227	-1.5469	0.53322	-0.462583	0.215359	1.11918	0.379419	1.6502
clust1	ENSG00000172301	-0.875392	-0.958468	-1.37316	0.848698	0.791631	1.08667	-0.44578	0.437695	-0.276135	-1.32313	-0.242892	-0.234265	-0.5503	-0.304392	-1.1157	1.57388	1.66668	1.29436
clust1	ENSG00000176714	-0.744782	-0.292332	-1.42376	0.98097	0.85046	2.00502	-0.312068	0.637008	-0.868574	-1.24957	-0.607851	-1.21085	-0.667835	-0.109828	-0.111688	0.951149	1.42849	0.746043
clust1	ENSG00000176597	-0.362093	-1.18573	-1.24595	0.238779	0.369168	0.121565	-0.951691	-1.23916	-0.94339	-0.464873	-0.637172	-0.40083	0.679812	0.456956	0.465827	1.74278	1.55185	1.80416
clust1	ENSG00000268279	-0.670693	-0.397413	-0.0268406	-0.171458	0.515556	0.848577	-0.91703	-1.79836	-0.835654	-0.902008	-0.34232	-0.97373	0.877705	0.154145	-0.112433	1.7709	1.07962	1.90145
clust1	ENSG00000177663	-2.26609	-0.569054	-0.25789	0.560342	0.510631	0.700186	-0.0428112	-0.573333	-0.0148322	-1.1657	-0.959108	-1.04747	0.19342	0.0952235	0.450507	1.29747	1.55941	1.5291
clust1	ENSG00000126001	-1.18665	-0.23106	-0.221094	-0.0236735	-0.103621	-0.238053	-0.695082	-0.966564	-0.417145	-0.623358	-0.830562	-0.687532	0.222867	-0.254397	0.239861	1.97034	1.87964	2.16608
clust1	ENSG00000131591	-1.2431	-0.716283	0.0165361	0.280591	0.132582	-0.154461	-0.722243	-0.512766	-0.750613	-0.793862	-0.739386	-0.42843	-0.17676	-0.14564	-0.0451504	2.20294	1.91048	1.88557
clust1	ENSG00000157657	-1.88064	-0.417167	-0.11528	-0.0315132	-0.187856	0.00203412	-0.228024	-0.874715	-0.273238	-0.242292	-0.361438	-0.591829	-0.0698715	-0.634468	0.0871678	1.88948	1.73904	2.19061
clust1	ENSG00000159788	-1.25316	-0.0477032	-0.269043	0.239493	-0.176111	0.0313687	-0.336407	-0.365047	-0.255277	-0.739073	-0.70812	-1.05695	-0.304728	-0.53544	-0.283647	2.09198	1.78288	2.18498
clust1	ENSG00000124664	0.0953895	-0.761065	0.135362	-0.362554	1.21093	0.79395	-0.761065	-0.761065	-0.761065	-0.761065	-0.761065	0.282362	-0.761065	-0.761065	-0.374146	-0.0438602	2.63546	1.71562
clust1	ENSG00000170323	-0.871183	-0.871183	-0.871183	-0.723749	0.726024	0.2827	-0.871183	-0.126436	-0.725798	0.204342	0.174782	0.0604213	-0.871183	-0.749978	-0.0955819	1.18319	2.73987	1.40614
clust1	ENSG00000102837	-0.54148	-0.0472542	-0.54148	-0.54148	-0.54148	-0.54148	-0.54148	0.348317	-0.54148	-0.54148	-0.54148	-0.101972	-0.54148	-0.54148	-0.301535	1.52905	2.9551	1.57458
clust1	ENSG00000118113	-0.447201	-0.135004	-0.447201	-0.447201	-0.447201	-0.447201	-0.447201	-0.16074	-0.447201	-0.447201	-0.165267	-0.447201	-0.447201	-0.447201	-0.447201	1.68287	3.31888	0.825671
clust1	ENSG00000127588	0.611025	-0.654342	0.234489	1.02352	0.949629	-0.151743	-0.480141	-1.49769	-1.49769	-0.246111	1.47476	-0.0933188	-0.982143	-0.20024	-1.49769	1.47411	0.212945	1.32064
clust1	ENSG00000051825	1.2534	-0.882558	-0.984693	0.282003	0.651073	0.27192	-1.39054	-1.99337	-1.51251	0.27951	0.474933	0.00426736	0.0771529	-0.199311	0.0260894	1.30517	0.920832	1.41663
clust1	ENSG00000145241	0.981762	-1.12731	-0.794567	0.810503	1.24666	0.897036	-1.4876	-1.8602	-1.16405	0.380846	0.184179	-0.125985	-0.442376	-0.269764	-0.435965	1.12501	1.08519	0.996631
clust1	ENSG00000156802	1.16576	-0.35753	-0.362266	0.512961	0.571006	0.531019	-1.55637	-1.61078	-1.46846	0.395475	0.422228	0.304941	-0.882756	-0.784105	-0.735404	1.18658	1.26815	1.39956
clust1	ENSG00000121621	1.09439	-0.605085	-0.81976	0.501809	0.55799	0.502019	-1.50157	-1.41123	-1.48432	0.29269	0.240043	0.0358265	-0.506597	-0.825714	-0.401019	1.38955	1.46117	1.4798
clust1	ENSG00000011426	1.11356	-0.379476	-0.406032	0.226483	0.309913	0.313792	-1.40928	-1.65149	-1.37124	0.196515	0.182817	0.0902225	-0.618219	-0.628906	-0.655436	1.53193	1.55802	1.59681
clust1	ENSG00000137812	1.44491	-0.387325	-0.36498	0.254674	0.368738	0.311966	-1.43378	-1.52181	-1.45147	0.0644738	0.0265922	0.121274	-0.557944	-0.733103	-0.595422	1.51059	1.37573	1.56688
clust1	ENSG00000178295	1.27197	-0.706599	-0.825093	0.0455289	-0.0462712	0.146614	-1.23719	-1.66209	-1.46423	0.344953	0.382523	0.26818	-0.421518	-0.29683	-0.377356	1.46528	1.51123	1.6009
clust1	ENSG00000213551	0.851178	-0.559839	-0.894738	0.279281	0.21679	0.293629	-1.34192	-1.56518	-1.23773	0.515451	0.358092	0.877869	-0.81684	-0.802993	-0.548421	1.48811	1.506	1.38127
clust1	ENSG00000119397	0.49468	-0.354909	-0.986339	0.987681	0.496895	0.890093	-1.32997	-1.56361	-1.44957	0.191226	0.1149	0.0786843	-0.306285	-0.750978	-0.754732	1.37116	1.29098	1.58011
clust1	ENSG00000174799	1.32715	-1.0564	-1.0958	0.911773	0.61971	0.739919	-1.21331	-1.30379	-0.691416	-0.0778848	-0.0554053	-0.168592	-0.682112	-0.73056	-0.715148	1.17909	1.37913	1.63365
clust1	ENSG00000136492	0.7475	0.267175	0.10692	0.0103645	-0.0320591	0.000858987	-1.19325	-1.21649	-1.21766	0.305605	0.125019	0.209017	-1.10381	-1.06603	-0.986624	1.67714	1.6086	1.75771
clust1	ENSG00000276043	0.0379069	-0.148902	-0.0356101	0.298475	0.198543	0.238949	-1.08329	-1.13954	-0.991936	0.46347	0.447341	0.372486	-1.12268	-1.28843	-1.24169	1.64491	1.69229	1.65772
clust1	ENSG00000166803	0.388899	-0.245915	0.0757847	0.786173	0.591139	0.706425	-1.79567	-1.47751	-1.71824	0.195248	0.165112	-0.0884939	-0.642629	-0.495785	-0.624559	1.45161	1.41352	1.31488
clust1	ENSG00000171848	0.82071	0.141184	0.115617	0.571147	0.570055	0.541233	-1.60749	-1.80169	-1.84663	0.248517	0.334786	0.27328	-0.659982	-0.715583	-0.653318	1.24552	1.20824	1.2144
clust1	ENSG00000189308	0.255844	0.0163455	0.290567	0.0127231	0.48292	0.313703	-1.47779	-1.84152	-1.32437	0.039877	0.079466	-0.0985261	-0.639429	-0.232813	-0.792653	1.55842	1.58936	1.76786
clust1	ENSG00000136122	1.09066	-0.58479	-0.053028	0.437221	0.229211	-0.0635514	-1.49895	-1.92912	-0.909732	0.0112822	0.241599	0.166357	-0.434768	-0.321095	-0.981204	1.66901	1.45488	1.47601
clust1	ENSG00000138180	0.557658	-0.474804	-0.420208	0.266664	0.242853	0.0539076	-1.46775	-1.57054	-1.66568	0.130584	0.108564	0.134275	-0.235841	-0.327402	-0.357602	1.69919	1.62952	1.69661
clust1	ENSG00000171241	0.458527	-0.608275	-0.474992	0.250807	0.389927	0.31633	-1.49097	-1.61937	-1.4051	0.355761	0.477855	0.439858	-0.616623	-0.540726	-0.648631	1.59336	1.60961	1.51265
clust1	ENSG00000125740	0.673547	-0.868545	-0.602925	1.01835	0.0452652	1.00734	-1.14068	-0.925537	-1.398	-0.250071	-0.262271	-0.00297996	-0.919031	-0.614614	-0.51155	1.82644	1.59024	1.33503
clust1	ENSG00000221818	0.425267	-0.84498	-0.502406	1.00547	0.0851027	0.488997	-0.84498	-0.84498	-0.697111	-0.286378	-0.437662	-0.576867	-0.84498	-0.722084	-0.84498	1.6963	2.21302	1.53325
clust1	ENSG00000089050	-0.300215	-0.27524	0.152735	0.284737	-0.186804	0.236748	-1.07947	-1.65272	-0.834043	0.176613	0.194929	0.12092	-0.367949	-1.0949	-0.833199	1.85993	1.76512	1.8328
clust1	ENSG00000161996	-0.625696	-0.00637595	-0.23073	0.755302	0.625388	0.654214	-1.57568	-1.5048	-0.740785	0.458581	-0.12903	0.251077	-0.623954	-1.17671	-0.759	1.66853	1.29834	1.66133
clust1	ENSG00000159147	-0.00310531	-0.23446	-0.485292	0.102335	0.0158604	-0.173679	-1.54813	-1.2404	-1.48539	-0.218629	0.374085	0.312949	-0.254768	-0.0731825	-0.482048	1.92649	2.06226	1.40511
clust1	ENSG00000197933	0.307632	-1.31446	-0.819633	0.271471	0.381788	0.0920766	-0.942869	-1.1059	-1.13948	0.118715	0.147001	0.453442	-0.57767	-0.495063	-0.711967	1.91101	1.82776	1.59615
clust1	ENSG00000026036	-0.0131611	-0.962381	-1.01863	0.172123	0.736257	0.47139	-1.31931	-1.2612	-1.26447	-0.986486	0.196682	0.212802	0.0970176	-0.241763	1.64395	2.01451	0.395969	1.1267
clust1	ENSG00000196678	-0.780734	-0.430097	-0.758975	0.344308	0.783434	0.375821	-1.93392	-1.97335	-1.19066	0.165847	0.384884	-0.027679	0.868216	-0.000407925	0.789374	1.48651	0.683328	1.21411
clust1	ENSG00000168116	-0.143272	-1.02398	-1.05709	0.742963	1.03963	0.551171	-1.60294	-1.63397	-1.66212	0.367534	0.66334	0.290566	-0.135357	-0.0619112	0.129394	1.23918	1.18813	1.10874
clust1	ENSG00000154429	-0.154818	-0.754544	-0.695776	0.647215	0.317307	0.12784	-1.43529	-1.89132	-1.46602	0.58174	0.347128	-0.0170332	0.13818	-0.030671	-0.260755	1.58866	1.20164	1.75651
clust1	ENSG00000168078	-0.540546	-0.813143	-0.74956	0.574965	0.467619	0.557904	-1.39434	-1.44817	-1.37284	0.119085	0.202614	0.0945459	-0.228561	-0.247004	-0.255827	1.69786	1.73902	1.59638
clust1	ENSG00000135899	0.25188	-0.35988	-0.0422071	0.683972	1.8601	1.57447	-1.68044	-1.27393	-1.62821	-0.797484	-0.670139	-0.683381	0.317225	0.0958675	0.466595	0.475226	1.02195	0.388391
clust1	ENSG00000175548	-1.23029	0.0577156	0.119463	1.21053	1.63898	1.22682	-1.67003	-1.31589	-1.27723	-0.336244	-1.21667	-0.151826	0.577241	0.213526	0.0669603	0.781447	0.338319	0.967165
clust1	ENSG00000158201	0.0238639	1.20573	0.0476779	0.4258	0.589286	0.0213944	-1.4527	-1.19604	-2.10964	-0.947732	-0.702493	-0.977211	0.519647	0.590402	0.893311	1.07057	0.756866	1.24126
clust1	ENSG00000249992	-0.765096	0.190391	0.711464	0.400348	0.308565	0.506418	-1.34639	-0.731174	-1.40283	-1.09978	-1.05147	-0.941713	0.075529	0.34703	0.0195846	1.60016	1.8165	1.36246
clust1	ENSG00000148459	1.81085	0.324159	0.697762	-0.0258339	-0.910012	-0.573806	-0.82757	-0.781111	-0.824216	-0.36929	-0.563188	-0.0872944	-0.728433	-0.999047	-0.827573	1.57735	1.49802	1.60924
clust1	ENSG00000100749	2.11992	0.387592	0.347741	-0.412126	-0.393678	-0.190046	-0.794287	-0.975775	-0.945029	-0.272941	-0.531337	-0.393077	-0.805105	-0.759077	-0.903906	1.56123	1.59618	1.36371
clust1	ENSG00000152455	1.92886	0.253354	0.611066	-0.284415	-0.176038	0.192544	-0.791019	-1.17573	-1.04456	-0.491334	-0.376666	-0.257093	-0.825928	-0.974222	-1.00366	1.48155	1.53262	1.40067
clust1	ENSG00000112312	1.78059	0.337664	0.471992	-0.305965	-0.148348	-0.225514	-1.08621	-0.890042	-1.04475	-0.430489	-0.130482	-0.250301	-1.22544	-0.732425	-0.801247	1.59895	1.61681	1.46522
clust1	ENSG00000106462	1.61605	0.595298	0.422438	-0.101498	-0.154067	-0.160501	-0.858539	-0.945287	-0.770604	-0.578836	-0.159358	-0.483682	-1.11657	-0.887196	-1.17664	1.66147	1.52968	1.56784
clust1	ENSG00000182481	1.67674	0.564538	0.580773	-0.129292	-0.142982	-0.0985387	-0.836699	-1.01484	-0.869612	-0.378957	-0.365385	-0.345728	-1.04237	-1.07972	-1.12569	1.49966	1.59976	1.50835
clust1	ENSG00000099783	1.32057	0.54419	0.538803	0.0791346	0.0126065	-0.0601369	-1.27846	-1.06564	-1.43582	-0.397268	-0.266112	-0.292275	-0.82478	-0.65772	-0.952424	1.53852	1.69071	1.50611
clust1	ENSG00000183814	1.66212	0.305936	0.267295	-0.049407	-0.0435217	-0.0515239	-1.09452	-1.14345	-1.11336	-0.477294	-0.467177	-0.438997	-0.939359	-0.451855	-0.824774	1.62058	1.76435	1.47496
clust1	ENSG00000178966	1.67707	0.204396	0.37329	-0.216773	-0.341656	-0.156053	-1.12877	-1.31567	-1.25132	-0.591796	-0.363544	-0.579028	-0.23696	-0.376962	-0.565332	1.70015	1.57592	1.59305
clust1	ENSG00000134057	1.32035	0.687302	0.631676	-0.182572	-0.193198	-0.160377	-1.30167	-1.36757	-1.48553	-0.476987	-0.30626	-0.343692	-0.490616	-0.514287	-0.500847	1.56267	1.62339	1.49822
clust1	ENSG00000203760	1.28762	0.772069	0.777834	-0.239713	-0.345917	-0.277115	-1.29578	-1.35423	-1.28462	-0.322405	-0.306639	-0.561748	-0.501264	-0.350819	-0.69103	1.49635	1.66038	1.53703
clust1	ENSG00000163006	1.67245	0.833517	0.799741	0.000273907	0.276122	-0.144796	-1.01252	-1.10593	-1.23925	-0.369727	-0.536375	-0.498646	-0.596179	-1.00565	-1.13745	1.07659	1.61856	1.36929
clust1	ENSG00000124789	1.82903	0.576625	0.761006	-0.453705	-0.260844	-0.451108	-0.844624	-1.4705	-0.811117	-0.127453	-0.460008	-0.476542	-0.669734	-0.916768	-0.656284	1.41795	1.46027	1.55381
clust1	ENSG00000137760	1.66068	1.01242	0.67407	-0.325695	-0.0839175	-0.256188	-1.16711	-1.45437	-0.739872	-0.126565	-0.355778	-0.473293	-0.738944	-0.669869	-1.14442	1.43597	1.24038	1.51251
clust1	ENSG00000120647	2.10482	0.47911	0.361196	-0.470269	-0.286376	-0.366997	-0.953111	-1.54569	-1.4078	-0.418822	-0.719052	-0.258174	-0.00661757	-0.184022	-0.396383	1.26792	1.48353	1.31673
clust1	ENSG00000166788	2.24808	0.277533	0.33789	-0.758782	-0.102363	-0.624275	-1.01136	-1.01351	-1.24627	-0.643314	-0.751798	-0.509295	-0.018627	-0.0705932	-0.272449	1.52167	1.49784	1.13962
clust1	ENSG00000160124	2.28584	0.67997	0.721621	-0.458762	-0.753658	-0.44965	-1.31847	-1.16055	-1.16591	-0.527793	-0.369049	-0.0759596	-0.59364	0.00816637	-0.437593	1.14736	1.37537	1.09271
clust1	ENSG00000187522	2.56747	0.643492	0.623928	-0.873942	-0.528876	-0.549386	-1.28701	-0.913763	-1.31108	-0.459966	-0.00874475	-0.617821	-0.202286	0.0553431	-0.269428	1.19183	1.10518	0.835051
clust1	ENSG00000132780	2.6431	0.687878	0.621895	0.0441142	-0.0815474	-0.11087	-1.00466	-1.1164	-1.01528	-0.372146	-0.337226	-0.294029	-0.912132	-0.895854	-0.893262	1.05088	0.998756	0.986782
clust1	ENSG00000163002	2.55893	0.648452	0.601729	-0.107766	0.0406712	-0.280611	-1.05935	-1.01183	-1.07648	-0.495401	-0.319648	-0.20116	-0.558345	-1.13481	-0.860647	1.15385	1.0879	1.01452
clust1	ENSG00000197299	2.3464	0.710808	0.638464	-0.279902	-0.256791	-0.170726	-1.20835	-1.12182	-1.098	-0.240647	-0.356917	-0.102391	-0.809761	-0.778274	-0.855078	1.29025	1.11111	1.18162
clust1	ENSG00000198554	2.3368	0.662971	0.587728	-0.254611	-0.102934	-0.153121	-1.33636	-1.29156	-1.16129	-0.229308	-0.145545	-0.0912182	-0.711229	-0.839619	-0.738145	1.08532	1.18729	1.19483
clust1	ENSG00000125885	2.10681	0.449207	0.409214	-0.00115701	0.0355313	-0.00739365	-1.08705	-1.21857	-1.28988	-0.361479	-0.328252	-0.186473	-1.0112	-0.790411	-0.740276	1.35021	1.31043	1.36075
clust1	ENSG00000186871	2.25882	0.560159	0.509259	0.0976891	0.072481	-0.245075	-1.16873	-1.24764	-1.22468	-0.305147	-0.087576	-0.177914	-0.998739	-0.911311	-0.728519	1.11213	1.16402	1.32078
clust1	ENSG00000060749	2.83941	0.504903	0.696862	-0.264925	0.0248094	-0.00691648	-0.716747	-1.07264	-0.902526	-0.461704	-0.634164	-0.626984	-0.779699	-0.721541	-0.802226	0.87052	1.04383	1.00973
clust1	ENSG00000148835	2.71709	0.570477	0.313167	-0.0466035	0.156538	-0.0692911	-0.930658	-0.994973	-1.1342	-0.601618	-0.405893	-0.777503	-0.87136	-0.57042	-0.568594	0.912483	1.15358	1.14779
clust1	ENSG00000173674	2.24951	0.560739	0.617094	-0.0121313	-0.123445	-0.167123	-0.866147	-1.51829	-0.746841	-0.724622	-0.542319	-0.400792	-0.68232	-0.597416	-0.902362	1.22108	1.37991	1.25548
clust1	ENSG00000159063	2.39664	0.350025	0.622915	-0.404431	-0.369635	-0.234502	-0.974727	-1.14159	-0.792155	-0.551065	-0.600582	-0.572264	-0.699271	-0.412496	-0.652222	1.32057	1.40334	1.31145
clust1	ENSG00000092201	2.56584	0.595942	0.592076	-0.254849	-0.283944	-0.32155	-0.954902	-1.28361	-1.01425	-0.500117	-0.551763	-0.601593	-0.505015	-0.500944	-0.520924	1.19835	1.13168	1.20957
clust1	ENSG00000101773	2.51828	0.57671	0.595879	-0.473051	-0.308485	-0.264661	-1.13167	-1.10894	-0.987784	-0.236816	-0.535063	-0.52139	-0.49103	-0.578154	-0.680542	1.20859	1.37996	1.03816
clust1	ENSG00000124207	2.25007	0.399897	0.417938	-0.406292	-0.276073	-0.317193	-1.09364	-1.23829	-1.08886	-0.307302	-0.260578	-0.405241	-0.627985	-0.559451	-0.677072	1.37791	1.38899	1.42316
clust1	ENSG00000138346	2.19173	0.590553	0.55518	-0.0460657	-0.255523	-0.118221	-1.16908	-1.2394	-0.986154	-0.423494	-0.344875	-0.312345	-0.935159	-0.705702	-0.762987	1.33026	1.33382	1.29747
clust1	ENSG00000165490	1.95417	0.512793	0.236667	-0.502956	-0.275993	-0.461518	-1.05805	-1.12212	-1.19254	0.137412	-0.0452249	-0.139661	-0.881376	-0.72593	-0.837548	1.41658	1.4188	1.5665
clust1	ENSG00000174442	2.21582	0.472083	0.596978	-0.671093	-0.578323	-0.455471	-1.1403	-1.05691	-1.19333	-0.307575	-0.0592132	-0.16645	-0.43668	-0.557424	-0.727321	1.44505	1.29927	1.32089
clust1	ENSG00000167088	2.29176	0.373182	0.398825	-0.441408	-0.434396	-0.534296	-0.685859	-0.754211	-0.812651	-0.489776	-0.866103	-0.688392	-0.709125	-0.273882	-0.753368	1.51748	1.62168	1.24055
clust1	ENSG00000086200	2.70551	0.663012	0.245742	-0.669159	-0.445437	-0.488958	-0.65249	-0.865708	-0.861522	-0.362112	-0.49009	-0.552058	-0.420166	-0.910468	-0.527268	1.17959	1.32927	1.12232
clust1	ENSG00000108064	2.44947	0.345632	0.219884	-0.287609	-0.234105	-0.407939	-0.724885	-1.06145	-0.664809	-0.708588	-0.506303	-0.567829	-0.643863	-0.837742	-0.57521	1.42341	1.31858	1.46335
clust1	ENSG00000144395	2.38263	0.247435	-0.072648	-0.411529	-0.302335	-0.616427	-0.698672	-0.958008	-0.868232	-0.443984	-0.405513	-0.409223	-0.739968	-0.630054	-0.547086	1.468	1.57813	1.42748
clust1	ENSG00000196437	1.00797	0.700289	0.19973	-0.123175	-0.361998	-0.292186	-1.26226	-1.99629	-1.58552	0.731954	0.436977	-0.23235	-0.336657	-0.657231	-0.242968	1.30825	1.78487	0.920586
clust1	ENSG00000124795	2.07676	0.165718	0.355786	0.398036	0.381092	0.298716	-1.46764	-1.57317	-1.47915	-0.211238	-0.0460893	-0.0983227	-0.698072	-0.691894	-0.755525	1.12161	1.12559	1.0978
clust1	ENSG00000140525	1.98631	0.502055	0.319285	0.145816	0.220284	0.269573	-1.39759	-1.48643	-1.36717	-0.1417	-0.00448559	-0.124776	-0.897963	-0.824812	-0.803855	1.20148	1.09103	1.31295
clust1	ENSG00000142731	1.98986	0.244298	0.298063	0.211094	0.162079	0.102367	-1.22695	-1.48234	-1.34241	-0.115347	-0.234972	-0.0303712	-0.882324	-0.833522	-0.784448	1.29984	1.23298	1.3921
clust1	ENSG00000176208	2.20242	0.565495	0.347833	0.138608	0.179344	0.269994	-1.41956	-1.48047	-1.41587	-0.270184	-0.207506	-0.326253	-0.311761	-0.720694	-0.87919	1.05463	0.956656	1.3165
clust1	ENSG00000184445	2.25353	0.591281	0.388493	0.145931	0.195075	0.140383	-1.59146	-1.5338	-1.42176	0.0359293	0.101844	-0.0464339	-0.695231	-0.727742	-0.754227	0.976773	0.947497	0.993906
clust1	ENSG00000100479	2.24554	0.626938	0.547545	0.0435883	0.145351	0.189203	-1.207	-1.77493	-1.00494	0.144783	-0.43865	-0.598408	-0.488762	-0.64648	-0.969391	1.13851	0.902699	1.1444
clust1	ENSG00000185480	2.39131	0.405136	0.544977	-0.245519	-0.189317	-0.121657	-1.30738	-1.29416	-1.44186	-0.0958658	-0.240357	-0.174829	-0.312967	-0.744542	-0.652898	1.19306	1.0167	1.27018
clust1	ENSG00000284946	2.34836	0.780718	0.584849	-0.241461	-0.137171	-0.0470961	-1.26517	-1.34764	-1.14177	0.0653158	-0.414715	-0.350506	-0.393166	-0.867949	-0.862433	1.43822	0.938055	0.913563
clust1	ENSG00000196418	1.84455	1.18764	0.485013	-0.659193	-0.185935	-0.274848	-1.10437	-1.3318	-1.16133	-0.0601289	0.322767	-0.0247176	-0.692903	-0.707587	-1.24737	1.07287	1.42677	1.11059
clust1	ENSG00000132646	2.031	0.54288	0.590727	-0.213822	-0.177969	-0.292401	-1.31683	-1.46623	-1.43575	0.192814	0.236362	0.28429	-0.802777	-0.758139	-0.859372	1.03704	1.29502	1.11316
clust1	ENSG00000146143	1.97133	1.14218	1.13873	-0.290398	-0.122442	-0.403504	-1.33763	-1.5084	-1.34273	0.237456	0.0230275	0.137166	-0.606968	-0.802286	-0.919781	0.800844	1.07245	0.810958
clust1	ENSG00000172244	1.36036	0.932301	0.389672	0.167645	-0.189707	-0.213736	-1.51051	-1.76548	-1.36634	0.0764084	0.0787029	0.103559	-0.550785	-0.812322	-0.658766	1.33607	1.54417	1.07875
clust1	ENSG00000071539	1.1373	0.751768	0.732185	-0.18966	-0.219524	-0.167506	-1.42295	-1.26385	-1.37349	-0.0215971	-0.0436584	0.0140042	-0.759619	-0.778278	-0.945765	1.50306	1.55295	1.49462
clust1	ENSG00000166845	1.18668	0.819663	0.845892	-0.00684752	-0.302972	-0.127897	-1.33474	-1.44675	-1.17216	0.0612764	-0.0942672	0.0356588	-0.833012	-1.11141	-0.83432	1.41262	1.4667	1.43589
clust1	ENSG00000051341	1.82515	0.405588	0.456063	0.0390647	0.227633	-0.039271	-1.31986	-1.24867	-1.37827	0.00956754	-0.250258	-0.0395051	-0.823698	-0.923567	-0.989264	1.33761	1.3702	1.34149
clust1	ENSG00000120539	1.76558	0.415396	0.512716	0.016719	0.0376164	0.0135273	-1.31424	-1.38558	-1.13776	-0.24312	-0.139097	-0.304369	-0.845349	-0.706996	-0.980717	1.49146	1.39182	1.4124
clust1	ENSG00000164109	1.67577	0.547793	0.655042	0.0887824	0.04719	0.00233251	-1.46995	-1.41511	-1.47888	-0.139322	-0.194293	-0.185304	-0.763097	-0.660485	-0.746829	1.35867	1.37948	1.29822
clust1	ENSG00000123473	1.96517	0.818045	0.845732	-0.323654	-0.281566	-0.212112	-1.31683	-1.28141	-1.3069	-0.176647	-0.0105909	-0.274013	-0.769617	-0.750357	-0.683039	1.2996	1.26039	1.1978
clust1	ENSG00000169679	1.85883	0.952227	0.869375	-0.210662	-0.124737	-0.210047	-1.34085	-1.54883	-1.35028	-0.166943	-0.169223	-0.149811	-0.669164	-0.636414	-0.706186	1.17546	1.22396	1.20328
clust1	ENSG00000006634	1.7143	0.629678	0.751586	-0.252897	-0.0167553	-0.184834	-1.24303	-1.43073	-1.42694	-0.380802	-0.349591	-0.342131	-0.378392	-0.653753	-0.667028	1.38744	1.46946	1.37443
clust1	ENSG00000126787	1.85658	0.674344	0.675594	-0.0567885	-0.0989489	-0.0323005	-1.26118	-1.59346	-1.65823	-0.253804	-0.203838	-0.204469	-0.44036	-0.544724	-0.622035	1.22269	1.26958	1.27135
clust1	ENSG00000153044	1.19892	1.57623	1.69847	-0.198909	-0.383652	-0.30111	-1.2927	-1.20107	-1.59627	-0.509766	-0.463835	-0.464085	-0.416435	-0.327359	-0.379226	0.977775	1.12468	0.958351
clust1	ENSG00000129195	1.3374	1.26914	1.18495	-0.244212	-0.303568	-0.345426	-1.3469	-1.31129	-1.49976	-0.411008	-0.724116	-0.336467	-0.483697	-0.240706	-0.377862	1.27549	1.31573	1.24231
clust1	ENSG00000173207	1.22023	1.38185	1.36721	-0.178303	-0.0924574	-0.242834	-1.54507	-1.31689	-1.25872	-0.532204	-0.379357	-0.429954	-0.641733	-0.537055	-0.449543	1.22403	1.27072	1.1401
clust1	ENSG00000107672	1.62463	1.41974	1.0721	-0.315102	-0.308016	-0.133844	-1.4762	-1.2403	-1.68901	-0.424725	-0.373895	-0.402783	-0.225525	-0.22521	-0.513649	1.06073	1.32718	0.823886
clust1	ENSG00000164611	1.30213	1.3253	1.39188	-0.0396917	-0.151058	-0.185995	-1.53274	-1.60667	-1.65641	-0.614856	-0.524035	-0.448733	-0.0342183	-0.0856819	-0.120598	0.983161	1.13552	0.862702
clust1	ENSG00000277161	1.18524	0.759987	1.15895	-0.378096	-0.700662	-0.493436	-1.33725	-1.84192	-1.07457	-0.449188	-0.0437221	-0.275168	-0.246066	0.196099	-0.591311	1.46542	1.20431	1.46138
clust1	ENSG00000117593	1.62178	1.07438	0.961807	-0.547325	-0.338374	-0.820277	-1.24024	-1.52191	-1.01423	-0.178279	-0.551959	-0.360202	-0.227007	-0.497424	-0.386252	1.32427	1.30535	1.3959
clust1	ENSG00000166881	1.8689	1.19851	1.12718	-0.439327	-0.525833	-0.49514	-1.08292	-1.3743	-1.20996	-0.386539	-0.553079	-0.550255	-0.446854	-0.320588	-0.410952	1.22205	1.12929	1.24981
clust1	ENSG00000128944	1.5038	0.93182	0.915148	0.226223	0.0349072	0.0211533	-1.03786	-1.43424	-1.39405	-0.799576	-0.824317	-1.25011	-0.0357771	-0.210656	-0.433919	1.22035	1.24753	1.31957
clust1	ENSG00000197056	2.30999	1.22758	0.616453	-0.52677	0.16598	-0.522505	-1.04054	-1.32975	-1.40766	-0.478544	-0.82453	-0.696611	-0.0483691	-0.0305736	-0.336664	0.914828	0.962487	1.0452
clust1	ENSG00000181450	2.1951	0.953982	0.841921	-0.372659	0.0752839	-0.0980033	-1.41206	-1.70935	-1.21424	-0.408696	-0.73538	-0.694803	0.241915	-0.16939	-0.298471	0.82227	0.920667	1.06192
clust1	ENSG00000198521	2.17862	0.598566	0.676238	-0.311982	-0.184665	-0.0514805	-1.43159	-1.68026	-1.34171	-0.396564	-0.552094	-0.544248	-0.0715883	-0.211908	-0.057612	1.07901	1.18788	1.11539
clust1	ENSG00000100526	1.37952	0.821167	1.12865	0.237752	0.218555	0.192862	-1.78402	-1.67014	-1.91156	-0.41784	-0.374002	-0.334077	-0.0313869	-0.0695983	-0.305887	0.948668	1.06494	0.906393
clust1	ENSG00000109084	1.78906	0.989141	0.982624	0.569143	0.466239	0.361192	-1.78178	-1.70395	-1.60374	-0.537819	-0.406254	-0.637895	-0.153109	-0.209635	-0.264922	0.775216	0.687156	0.679322
clust1	ENSG00000147274	1.69914	1.1263	1.15116	0.191492	0.199749	0.0774002	-1.58507	-1.89659	-1.56443	-0.617281	-0.546808	-0.565392	0.0469155	-0.0154245	-0.0586096	0.826116	0.863397	0.667935
clust1	ENSG00000100281	1.91499	1.01763	0.480534	-0.157395	-0.350434	-0.299971	-1.53998	-1.70643	-1.33811	-0.220591	-0.242699	0.0864647	-0.378328	-0.331072	-0.467045	1.10013	1.19952	1.23277
clust1	ENSG00000196247	2.46407	0.378741	0.642929	-0.161624	-0.279156	0.0100877	-1.47476	-1.64595	-1.45373	-0.155669	-0.158391	-0.250618	-0.223189	-0.476934	-0.13707	0.97471	0.880587	1.06597
clust1	ENSG00000072571	1.7162	0.450833	0.512526	-0.0515055	0.0906039	0.130264	-1.68803	-1.64647	-1.78941	-0.367661	-0.542702	-0.405232	-0.0566741	0.178036	-0.063345	1.14408	1.14737	1.24112
clust1	ENSG00000105750	1.89577	0.724119	0.799081	0.206275	0.260005	0.439503	-1.56403	-1.84745	-1.70103	-0.246841	-0.182075	-0.246752	-0.47261	-0.163749	-0.57487	0.687077	1.03937	0.948202
clust1	ENSG00000156970	1.99022	0.753164	0.667826	0.321743	0.271024	0.198184	-1.58634	-1.57816	-1.53571	-0.461714	-0.437382	-0.433779	-0.32035	-0.522528	-0.445447	0.979607	0.950144	1.18951
clust1	ENSG00000184260	1.57583	0.471653	0.226696	0.332616	-0.770333	-0.791542	-1.29518	-1.55579	-1.0368	-1.29263	0.558429	-0.351451	-0.0640165	-0.434332	0.643966	1.49223	0.849215	1.44145
clust1	ENSG00000104626	0.915116	-0.169002	-0.107566	-0.276912	-0.457512	-0.701322	-1.08042	-1.54131	-1.11918	0.202567	0.128601	0.0483336	-0.228491	-0.480356	-0.575378	1.80261	1.82889	1.81133
clust1	ENSG00000009954	1.20473	-0.365183	-0.182298	-0.185223	-0.347951	-0.291968	-1.01819	-1.4732	-0.884003	0.201777	0.0288317	-0.122647	-0.550401	-0.73026	-0.68739	1.70113	1.70887	1.99337
clust1	ENSG00000136108	1.0821	-0.342802	-0.221516	-0.385134	-0.229796	-0.463047	-1.06181	-1.21765	-1.06077	-0.129432	-0.176868	-0.147951	-0.398217	-0.509347	-0.436783	1.92409	1.94078	1.83416
clust1	ENSG00000122483	1.61413	-0.161134	-0.397	-0.361276	-0.110199	-0.463138	-1.35434	-1.52757	-1.44488	-0.0455792	-0.0344483	-0.34413	0.0892002	0.000936211	-0.174235	1.57384	1.44301	1.69681
clust1	ENSG00000189403	1.59518	-0.576606	-0.437062	-0.104885	-0.130479	-0.215033	-1.30529	-1.36682	-1.18433	-0.421504	-0.341059	-0.355075	-0.0712086	0.0294921	-0.143371	1.65402	1.75254	1.62149
clust1	ENSG00000147874	2.1521	-0.0369305	-0.0952595	-0.643467	-0.561112	-0.578153	-1.04835	-1.33131	-1.10796	0.11628	-0.236731	-0.386999	-0.249448	-0.331304	-0.167818	1.50325	1.56084	1.44237
clust1	ENSG00000187790	2.19884	-0.363474	-0.602973	-0.33146	-0.183666	-0.393447	-1.14606	-1.46661	-1.13921	0.106256	0.0481095	-0.095174	-0.354013	-0.313845	-0.264199	1.14321	1.58263	1.57509
clust1	ENSG00000138035	1.88407	0.205381	0.238386	-0.879565	-0.989092	-0.802431	-0.544306	-0.599505	-0.443593	-0.690488	-0.56551	-0.631117	-0.451091	-0.388224	-0.356534	1.72001	1.79585	1.49776
clust1	ENSG00000159593	2.0117	-0.0512849	-0.0947664	-0.55228	-0.745182	-0.751055	-0.716368	-0.746435	-0.674111	-0.745228	-0.499634	-0.5211	-0.467878	0.00518859	-0.482539	1.61666	1.8111	1.60322
clust1	ENSG00000064703	1.77065	0.382466	0.510019	-0.921593	-0.62229	-0.679263	-0.518627	-0.848776	-0.743622	-0.50647	-0.393351	-0.430389	-0.645049	-0.555025	-0.776453	1.7534	1.71674	1.50763
clust1	ENSG00000164032	1.80219	0.491298	0.332592	-0.778575	-0.784651	-0.838268	-0.878688	-0.542058	-1.00148	-0.721508	-0.283616	-0.495434	-0.305277	-0.333616	-0.56591	1.66187	1.72357	1.51756
clust1	ENSG00000075336	1.76436	0.0604233	-0.147031	-0.505616	-0.774817	-0.211068	-1.21693	-0.815478	-1.14147	-0.277124	-0.397751	-0.23129	-0.533227	-0.346367	-0.32948	1.64963	1.84345	1.60979
clust1	ENSG00000197275	1.92672	-0.0851894	0.0689612	-0.773937	-0.621441	-0.512822	-1.48603	-0.887497	-0.910602	-0.214266	-0.549609	-0.350807	-0.530273	0.285335	-0.0269085	1.77077	1.57996	1.31764
clust1	ENSG00000113649	2.09854	-0.239187	-0.430363	-0.0279418	-0.158054	-0.313797	-1.06323	-1.19111	-0.871793	-0.553975	-0.454011	-0.771049	-0.221124	-0.243597	-0.331016	1.64657	1.57816	1.54698
clust1	ENSG00000116750	1.43932	-0.637582	-0.135419	-0.418465	-0.233695	-0.347068	-0.807095	-0.990062	-0.845199	-0.639842	-0.32486	-0.541461	-0.173507	-0.248841	-0.689743	1.82565	1.88824	1.87964
clust1	ENSG00000113810	1.33132	-0.531086	-0.447815	0.0224637	0.00460821	-0.0508255	-1.49667	-1.83164	-1.65122	-0.222728	-0.240067	-0.415058	0.501918	0.476817	0.534636	1.33496	1.31314	1.36724
clust1	ENSG00000103018	0.697965	-0.458676	-0.20858	-0.188334	-0.380634	-0.0930194	-1.63096	-1.63723	-1.06295	-0.489719	-0.338209	-0.285221	0.395247	0.168485	0.360605	1.67481	1.76632	1.7101
clust1	ENSG00000152359	1.17656	-0.774609	-0.449172	-0.610738	-0.291311	0.320048	-1.38705	-1.37678	-0.855289	-0.478712	-0.378093	-0.333601	-0.143731	0.198819	0.161607	1.64277	1.90924	1.67005
clust1	ENSG00000213020	0.863782	0.00130559	0.330231	-0.17757	0.130447	-0.390382	-1.01003	-2.03753	-1.20032	-0.126842	0.195013	-0.69428	0.268579	-0.129093	-0.53455	1.47953	0.611394	2.42031
clust1	ENSG00000139354	0.983871	-0.108386	-0.026069	0.420942	0.30271	0.243766	-1.64138	-1.76335	-1.55999	-0.453732	-0.323158	-0.347345	-0.138592	-0.17174	0.0183275	1.47543	1.42757	1.66114
clust1	ENSG00000198826	0.442014	-0.2939	-0.0784126	0.617104	0.742775	0.470174	-1.39595	-1.39847	-1.44127	-0.473446	-0.460437	-0.587179	-0.362345	-0.435437	-0.349918	1.66364	1.62872	1.71235
clust1	ENSG00000149548	0.524213	0.548061	0.55312	0.207707	-0.0572466	0.003472	-1.33817	-1.44619	-1.54891	-0.197693	-0.536637	0.245721	-0.770819	-0.378125	-0.734663	1.49241	1.67071	1.76304
clust1	ENSG00000172167	0.941767	0.297674	0.286162	-0.076572	0.0728298	-0.107463	-1.43934	-1.53117	-1.26463	-0.272788	-0.142277	-0.365583	-0.406248	-0.729094	-0.400259	1.68723	1.61978	1.82997
clust1	ENSG00000117650	0.606928	0.606189	0.645985	0.147199	0.218666	0.0814951	-1.41337	-1.66437	-1.38305	-0.392065	-0.458524	-0.418918	-0.565396	-0.491567	-0.371288	1.59925	1.58441	1.66842
clust1	ENSG00000090889	0.926057	0.788561	0.735712	0.101621	0.202381	0.0636417	-1.49517	-1.64316	-1.49964	-0.324728	-0.315467	-0.375505	-0.53349	-0.517186	-0.54441	1.4518	1.4789	1.50007
clust1	ENSG00000161800	1.02035	0.647975	0.666624	0.00932412	0.0832466	0.171975	-1.48708	-1.76544	-1.36325	-0.156332	-0.141194	-0.227104	-0.589023	-0.662461	-0.646839	1.44046	1.4945	1.50426
clust1	ENSG00000040275	0.759834	-0.383479	-0.521865	-0.257183	-0.285238	-0.17052	-1.00958	-0.863784	-1.00181	-0.678602	-0.367621	-0.465658	-0.213173	-0.201649	-0.348658	1.9707	2.0181	2.02018
clust1	ENSG00000121957	0.418402	-0.222477	-0.325592	0.0312431	-0.125511	0.0796943	-1.1529	-1.16567	-1.02469	-0.483	-0.329497	-0.555017	-0.222092	-0.413428	-0.463224	2.0323	2.00804	1.91342
clust1	ENSG00000100629	1.2715	0.289118	-0.300178	-0.398356	-0.249469	-0.355428	-0.991957	-1.0738	-0.92854	-0.274398	-0.173447	-0.367553	-0.561538	-0.704199	-0.732148	1.85662	1.90342	1.79035
clust1	ENSG00000185697	1.18912	-0.0164432	-0.242036	-0.465251	-0.0602591	-0.255182	-0.831108	-0.791718	-0.58931	-0.107529	-0.591992	-0.427566	-0.942652	-0.750693	-0.832235	1.88712	1.92999	1.89775
clust1	ENSG00000114405	1.12203	-0.0197161	-0.0178506	-0.44886	0.139092	-0.224114	-0.971296	-1.00335	-0.620878	-0.56599	-0.442898	-0.645195	-0.329831	-0.981951	-0.624186	2.10747	1.56998	1.95755
clust1	ENSG00000156374	1.10537	0.0581498	0.0770809	-0.089285	0.131505	-0.475624	-1.01904	-0.969119	-0.959859	-0.79659	-0.446523	-0.269197	-0.634967	-0.669453	-0.632791	1.72879	1.8422	2.01935
clust1	ENSG00000147231	1.89662	-0.230725	-0.325452	0.687047	0.200923	0.00651315	-0.573776	-0.980936	-0.68342	-0.795211	-0.705423	-1.58653	-0.488155	-0.152897	-0.703992	1.51807	1.52346	1.39389
clust1	ENSG00000143815	1.08587	0.152601	0.302045	-0.107097	0.0310497	-0.118107	-0.930216	-1.19603	-0.814198	-0.929623	-0.853134	-1.06346	-0.222649	-0.253113	-0.468541	1.77923	1.79706	1.80833
clust1	ENSG00000170264	1.50184	-0.0747383	-0.215131	0.164495	-0.0123895	0.385491	-0.880802	-0.926077	-1.44182	-0.982611	-1.02394	-0.954606	-0.0399906	-0.160803	-0.15228	1.86687	1.43825	1.50825
clust1	ENSG00000100578	1.9622	-0.268993	-0.323796	-0.332709	0.142447	0.110069	-1.17445	-1.81047	-1.35993	0.101804	-0.113607	-0.0404153	0.0254824	-0.591881	-0.406895	1.16689	1.16266	1.75159
clust1	ENSG00000156876	2.06011	0.211956	0.0713516	-0.261117	-0.178035	-0.0824169	-1.50087	-1.1726	-1.42465	-0.266762	-0.0677392	-0.0572735	-0.1622	-0.814072	-0.534141	1.53056	1.18196	1.46594
clust1	ENSG00000114346	1.9535	0.238672	0.203076	-0.193261	-0.15021	-0.22805	-1.49896	-1.56298	-1.31817	-0.112151	-0.141653	-0.123967	-0.382685	-0.613458	-0.276498	1.40663	1.40568	1.39448
clust1	ENSG00000118193	1.85622	0.0277958	0.145082	-0.210418	-0.151316	-0.00539546	-1.37544	-1.53378	-1.54268	-0.314787	-0.184041	-0.261186	-0.168079	-0.373348	-0.283658	1.45038	1.3863	1.53835
clust1	ENSG00000112742	2.05874	0.312673	0.00247983	0.0730918	0.0923446	0.0585438	-1.34842	-1.54721	-1.49237	-0.0707376	-0.141543	-0.210929	-0.62077	-0.464031	-0.628002	1.27147	1.36173	1.29295
clust1	ENSG00000163507	1.87287	0.0779879	-0.134905	-0.0620225	0.0511499	-0.0697328	-1.33817	-1.40686	-1.1861	-0.0709888	0.0803792	-0.279842	-0.822424	-0.536315	-0.67905	1.54332	1.46893	1.49178
clust1	ENSG00000055044	2.19608	-0.264741	-0.148406	-0.0560016	0.0602794	-0.0270178	-1.28485	-1.28949	-1.28663	0.01893	0.206732	0.00348872	-0.818831	-0.729468	-0.616558	1.3014	1.21146	1.52364
clust1	ENSG00000167325	1.79779	-0.333925	-0.245367	0.223142	0.253047	0.198269	-1.33088	-1.28563	-1.42219	0.0932013	-0.112437	-0.0306789	-0.705156	-0.718387	-0.75744	1.43254	1.49491	1.44919
clust1	ENSG00000133739	1.80598	-0.330878	0.0630907	-0.0953903	0.352063	-0.528923	-1.39087	-1.38227	-1.22037	-0.0561801	-0.194543	-0.147929	-0.408134	-0.364858	-0.65168	1.32918	1.86963	1.35209
clust1	ENSG00000163535	1.45864	-0.345396	-0.0867359	-0.095111	-0.0773184	0.00486165	-1.36403	-1.46609	-1.27953	-0.113063	-0.28465	-0.140966	-0.41926	-0.443139	-0.382365	1.69733	1.70798	1.62884
clust1	ENSG00000117724	1.70494	-0.133538	-0.237471	0.193114	0.333263	0.18267	-1.39767	-1.60464	-1.37201	-0.2396	-0.300719	-0.35404	-0.344892	-0.486957	-0.402982	1.46949	1.46196	1.52909
clust1	ENSG00000066279	1.95621	-0.267861	-0.330945	0.144434	0.217032	0.165066	-1.45473	-1.49787	-1.41578	-0.154312	-0.199555	-0.255816	-0.361714	-0.418074	-0.356731	1.41403	1.36157	1.45504
clust1	ENSG00000138182	1.90133	-0.169367	-0.157388	-0.00234078	0.0163381	0.0123916	-1.50998	-1.48374	-1.42973	-0.136355	-0.219491	-0.274558	-0.242932	-0.434983	-0.236124	1.43862	1.43149	1.49683
clust1	ENSG00000163072	2.53824	-0.286255	0.0651569	0.27634	-0.29436	-0.0215821	-1.364	-1.30634	-1.06477	-0.116776	-0.019714	-0.0829348	-0.17415	-0.923018	-0.737008	1.34864	1.1227	1.03985
clust1	ENSG00000163808	1.97347	-0.0571073	-0.162959	0.658083	0.469577	0.316089	-1.20993	-1.54912	-1.57718	-0.0207508	-0.396829	-0.0231874	-0.604227	-0.703919	-0.735718	1.07992	1.2049	1.33888
clust1	ENSG00000136824	1.94024	-0.713314	-0.708478	0.344077	0.392782	0.592589	-1.53513	-1.59418	-1.28158	0.116554	-0.0986537	0.00553078	-0.105643	-0.597334	-0.426073	1.19706	1.22351	1.24804
clust1	ENSG00000138778	1.9213	-0.485949	-0.694178	0.20733	0.177141	0.0577408	-1.42612	-1.52494	-1.43706	0.0419561	-0.0332016	-0.163476	-0.0989006	-0.453588	-0.244329	1.34976	1.29467	1.51184
clust1	ENSG00000109805	1.39494	0.137707	0.130492	0.290706	0.290812	0.331842	-1.43582	-1.54893	-1.44715	-0.0670985	0.0447921	-0.0168861	-0.833115	-0.723186	-0.865522	1.44168	1.42275	1.45199
clust1	ENSG00000137807	1.47885	0.299709	0.173433	0.348711	0.30948	0.283294	-1.33685	-1.56222	-1.48192	0.0744047	0.186954	0.0744109	-0.952088	-0.922465	-0.948034	1.36134	1.34064	1.27236
clust1	ENSG00000070950	1.57489	-0.104843	-0.306793	0.138758	0.140772	0.199864	-1.18131	-1.32426	-1.34904	0.253059	0.326258	0.391764	-1.03557	-0.853199	-1.10592	1.45354	1.2559	1.52614
clust1	ENSG00000092853	1.61382	0.219537	0.200014	0.0759509	0.0554852	0.146905	-1.29434	-1.25121	-1.21415	-0.00847103	0.0712458	0.16575	-1.01125	-1.06477	-1.04042	1.5511	1.33333	1.45148
clust1	ENSG00000171320	1.45507	-0.0572155	-0.233206	0.131875	0.126391	0.485819	-1.11943	-1.29065	-1.24492	0.169313	-0.0174669	0.167127	-0.838223	-1.28338	-0.949932	1.64463	1.42707	1.42713
clust1	ENSG00000175305	1.42485	-0.254873	-0.340377	0.95008	0.378734	0.104091	-1.50489	-1.20317	-1.16072	-0.320168	0.224655	-0.0674264	-0.764265	-1.03146	-0.766852	1.57023	1.38822	1.37335
clust1	ENSG00000080839	0.792093	-0.0249018	-0.0648658	0.436771	0.204989	0.417368	-1.38423	-1.45363	-1.13133	0.178129	0.277382	0.0626913	-0.816777	-1.15816	-1.05256	1.62141	1.51297	1.58264
clust1	ENSG00000169607	0.84439	-0.0891677	-0.132169	0.387615	0.274612	0.31256	-1.43472	-1.49558	-1.36918	-0.0261278	-0.108884	0.0977581	-0.631385	-0.862542	-0.699266	1.59141	1.70258	1.63809
clust1	ENSG00000102384	1.32605	-0.142845	0.0241527	0.0768363	-0.0747246	0.0568468	-1.18233	-1.31338	-1.2159	-0.149895	0.0439408	0.0484579	-0.749771	-0.831408	-0.941867	1.7364	1.56708	1.72236
clust1	ENSG00000162607	1.42361	-0.137096	0.0825022	0.28828	0.408215	0.265717	-1.20455	-1.3751	-1.18234	-0.0970196	-0.140388	-0.076466	-1.07864	-0.955253	-0.831383	1.51307	1.56978	1.52704
clust1	ENSG00000165704	1.4802	0.313216	-0.211214	-0.404529	0.115789	-0.206093	-1.00991	-0.821993	-1.52046	-0.228793	-0.274805	0.114409	-0.894674	-0.462861	-0.931932	1.77999	1.93006	1.23359
clust1	ENSG00000214367	1.45828	0.335432	-0.0236943	-0.466984	0.0483626	-0.285908	-1.38666	-1.59647	-0.81942	-0.41119	-0.108263	-0.459158	-0.516268	-0.539343	-0.222254	1.60845	1.70392	1.68115
clust1	ENSG00000120699	1.13992	0.737333	0.177793	0.00604552	0.221125	0.0406354	-1.52665	-1.34494	-1.71902	-0.488706	-0.275125	-0.31143	-0.469216	-0.399643	-0.37352	1.66412	1.54141	1.37987
clust1	ENSG00000166451	1.30066	0.682244	0.2049	-0.0671551	0.0448072	0.0527801	-1.56843	-1.28631	-1.47936	-0.309135	-0.222585	-0.27975	-0.608175	-0.428955	-0.688192	1.66964	1.47266	1.51035
clust1	ENSG00000123219	1.21172	-0.0184296	-0.143662	0.387569	0.187638	0.306044	-1.582	-1.47908	-1.37155	-0.479209	-0.271778	-0.353856	-0.403145	-0.287558	-0.514759	1.63871	1.60616	1.5672
clust1	ENSG00000143228	1.0672	0.0210196	-0.0575072	0.123112	0.221988	-0.0038704	-1.35932	-1.4664	-1.27075	-0.374038	-0.386226	-0.295867	-0.446053	-0.447421	-0.549399	1.71522	1.81015	1.69817
clust1	ENSG00000198464	2.99434	-0.825475	-1.02705	0.495989	0.0871907	-0.133826	-1.41212	-0.983734	-0.840238	-0.167011	-0.159264	-0.0621224	0.135641	-0.510495	-0.0507957	0.814964	0.867169	0.776847
clust1	ENSG00000145833	2.98615	-0.531452	-0.646459	-0.118745	-0.139383	-0.187648	-1.15063	-1.28799	-0.787734	-0.0288222	-0.107746	-0.0606972	-0.3657	-0.353802	-0.365311	1.00891	1.0523	1.08475
clust1	ENSG00000149308	2.90817	-0.855595	-0.819553	0.127869	-0.0607155	0.0156581	-1.05754	-1.2468	-0.992294	-0.0712082	-0.373753	-0.35198	0.0141936	-0.235152	-0.0665611	1.00549	1.02448	1.03529
clust1	ENSG00000159086	2.22013	-0.589959	-1.02465	-0.0102089	-0.136025	0.0365632	-0.851658	-1.59407	-0.744543	-0.55707	-0.482438	-0.942906	0.209332	0.357606	0.162297	1.31046	1.38036	1.25679
clust1	ENSG00000103540	2.13693	-0.991956	-1.29269	0.0226045	-0.159106	0.0314192	-0.556582	-1.33175	-0.707202	-0.0849466	-0.223206	-0.530872	-0.393258	-0.364326	0.115605	1.18902	1.26681	1.87351
clust1	ENSG00000103995	2.10102	-0.706225	-0.976234	0.0544071	0.141594	0.372371	-1.0452	-1.42225	-1.28556	-0.381798	-0.384749	-0.275235	-0.133142	-0.0606038	-0.156632	1.43842	1.46267	1.25714
clust1	ENSG00000146247	2.04206	-1.29261	-1.21547	0.286991	0.464875	0.299699	-1.10572	-1.34129	-0.963327	-0.298039	-0.428445	-0.201561	-0.0378013	-0.0513141	-0.0400981	1.32425	1.266	1.29179
clust1	ENSG00000132953	2.68758	0.284078	0.201484	-0.328134	-0.274138	-0.209811	-1.04478	-1.91928	-1.04445	0.713395	0.170793	0.478555	-0.325676	-0.936668	-0.556286	0.64505	0.621093	0.837193
clust1	ENSG00000146757	2.13751	0.127428	-0.220236	-0.0421652	-0.0071286	-0.118215	-1.60682	-1.89033	-1.67485	0.571233	0.679771	0.714919	-0.48903	-0.24221	-0.208102	0.837007	0.604356	0.826868
clust1	ENSG00000005801	2.4208	0.605114	0.629811	-0.648618	-0.682189	-0.767425	-1.26935	-1.49283	-1.30288	-0.253385	-0.308907	-0.313017	0.285505	-0.0581495	0.15776	0.98677	1.03214	0.978844
clust1	ENSG00000108506	2.44056	0.558388	0.281292	-0.321561	-0.210191	-0.341275	-1.81764	-1.83434	-1.15478	-0.313686	-0.348879	-0.139775	0.367145	0.0116025	0.638534	0.812392	0.648789	0.723423
clust1	ENSG00000075188	2.47104	0.0672655	-0.0397409	-0.0160331	0.209157	-0.155816	-1.42229	-1.90727	-1.5893	-0.129991	-0.107294	0.247256	0.21593	-0.177849	-0.31903	0.879034	0.798908	0.97602
clust1	ENSG00000082898	2.49273	0.14476	0.0457915	-0.0549897	-0.202024	-0.20021	-1.32961	-1.59905	-1.08812	-0.43849	-0.661061	-0.496501	0.133073	-0.17246	-0.130503	1.20508	1.09501	1.25657
clust1	ENSG00000129534	2.18458	0.0736381	0.0480664	0.00510939	0.230986	0.167721	-1.56775	-1.66646	-1.36069	-0.554709	-0.511647	-0.420273	0.0165075	-0.13761	-0.0885697	1.1467	1.19896	1.23544
clust1	ENSG00000151849	2.03565	-0.0425773	-0.0278817	-0.0238373	0.0428612	-0.104395	-1.64803	-1.73469	-1.47798	-0.2326	-0.150137	-0.198413	-0.00935398	-0.131779	-0.0809093	1.30696	1.15335	1.32375
clust1	ENSG00000154485	2.73205	-0.725753	0.146146	0.224806	1.24754	0.113029	-1.62916	-0.654939	-1.26307	0.263825	0.478969	-0.24928	-0.544892	-0.11331	-1.10029	-0.0803671	0.317476	0.837217
clust1	ENSG00000162924	2.44235	-0.734512	0.251725	0.136434	0.633363	1.09218	-1.41242	-1.66701	-1.33628	1.22809	-0.0745614	0.0219455	-0.0357513	-0.567637	-0.176711	0.311457	-0.435575	0.322899
clust1	ENSG00000101888	2.38181	-0.42057	-0.227916	0.93221	0.799724	0.296616	-1.78301	-1.41888	-1.55155	-0.843566	0.0624983	-0.124834	-0.014151	-0.0801775	0.195043	0.652005	0.420886	0.723846
clust1	ENSG00000167562	1.63146	-0.358461	-0.754973	0.937775	1.16972	0.723215	-1.16551	-2.09081	-1.49041	-0.479387	0.105797	-0.867031	-0.0410167	0.00969755	0.48063	0.748343	0.503479	0.937482
clust1	ENSG00000285077	1.30895	0.552544	0.357165	0.305003	0.0638282	1.29909	-1.35308	-1.35367	-1.34791	-0.482967	-0.591865	-1.01268	-0.529527	-0.674812	-0.129383	1.59371	0.407818	1.58779
clust1	ENSG00000118620	2.06061	0.649147	0.250914	0.224214	0.152696	0.426065	-1.4363	-1.59789	-1.05761	-0.806381	-0.548657	-0.621518	-0.417421	-0.344014	-0.541913	1.27158	1.09981	1.23667
clust1	ENSG00000164754	1.73193	0.351673	0.2399	0.751873	0.819922	0.731266	-1.38385	-1.60138	-1.44333	-0.741346	-0.595419	-0.836762	-0.34222	-0.280512	-0.572381	1.00678	1.05241	1.11145
clust1	ENSG00000197020	1.92119	0.318907	0.16348	0.638894	0.398475	0.478597	-1.61293	-1.80765	-1.42025	-0.694591	-0.0769013	-0.424753	-0.3171	-0.425838	-0.33578	1.17051	1.09343	0.932308
clust1	ENSG00000156504	0.799104	0.531213	0.313112	0.965609	0.987006	0.981194	-1.49074	-2.20706	-1.85721	-0.461349	-0.450669	-0.415596	-0.171096	0.188644	-0.101979	0.821517	0.802052	0.766246
clust1	ENSG00000164104	1.09756	0.723555	0.655716	0.846495	0.786762	0.779049	-1.85474	-1.84726	-1.93129	-0.112698	-0.077148	0.0173718	-0.523723	-0.397176	-0.41003	0.691369	0.845757	0.710428
clust1	ENSG00000176890	1.10663	0.402583	-0.0606496	0.243077	0.588098	0.46096	-2.165	-1.11166	-1.99115	-0.367914	-0.0454227	-0.0564306	0.457668	-0.529883	-0.47831	1.21691	1.00964	1.32086
clust1	ENSG00000167384	1.5176	-0.154228	-0.0731026	0.401923	0.665874	0.425476	-1.56216	-1.48801	-1.38611	-0.507369	-0.268946	-0.592553	0.107321	-0.170311	-0.982495	1.23916	1.20761	1.62032
clust1	ENSG00000131747	1.55128	0.0948339	0.141798	0.434345	0.384472	0.408228	-1.7065	-1.91842	-1.67328	-0.0712974	-0.0373433	-0.135007	-0.238977	-0.440558	-0.367053	1.16387	1.18726	1.22235
clust1	ENSG00000138160	1.27013	0.113348	0.0577757	0.400252	0.484434	0.410751	-1.69949	-1.73035	-1.64526	0.148004	0.144583	0.0415643	-0.520118	-0.615915	-0.727242	1.27909	1.22942	1.35902
clust1	ENSG00000080986	1.2056	0.402748	0.175509	0.417264	0.485689	0.302916	-1.62667	-1.54073	-1.75297	-0.196252	-0.0213708	-0.105964	-0.665322	-0.618858	-0.549402	1.33606	1.44695	1.30481
clust1	ENSG00000024526	1.27276	0.112899	0.0280488	0.243853	0.393728	0.274873	-1.64456	-1.72648	-1.5696	-0.127244	-0.0618549	-0.0895467	-0.397982	-0.489966	-0.53567	1.41624	1.48107	1.41944
clust1	ENSG00000170312	1.04764	0.0399083	-0.0713008	0.307747	0.43968	0.35925	-1.63129	-1.67747	-1.65693	-0.154034	0.0272456	-0.119141	-0.387811	-0.425701	-0.542627	1.41618	1.54243	1.48622
clust1	ENSG00000135315	1.36859	-1.67862	-1.9482	-0.109784	0.170038	0.234422	-0.230803	-0.600568	-0.179874	-0.392956	-0.369338	-0.570407	-0.233391	0.213515	-0.29541	1.68849	1.54439	1.3899
clust1	ENSG00000174173	1.77628	-1.52834	-1.54342	-0.0865524	-0.282822	-0.0829977	-0.651759	-0.330899	-0.0431126	-0.579132	-0.496559	-0.747736	0.150347	0.118784	-0.318495	1.57252	1.63676	1.43713
clust1	ENSG00000128641	0.975966	-1.23884	-1.24094	0.132505	0.225994	0.142812	-0.571073	-0.866205	-0.357448	-0.282628	-0.312742	-0.350956	-0.503422	-0.627486	-0.677048	1.84506	1.85211	1.85435
clust1	ENSG00000143498	1.24387	-0.410145	-1.58375	-0.11994	0.235578	-0.275358	-0.607618	-0.776079	-0.348214	-0.557629	0.0760905	-0.678149	-0.314091	-0.597947	-0.693638	1.58974	1.98221	1.83507
clust1	ENSG00000031691	1.5244	-0.761754	-1.07807	0.25065	-0.256748	-0.151092	-0.704974	-0.713937	-0.491116	-0.377446	-0.114134	-0.140269	-0.631131	-0.790392	-0.885026	1.99641	1.80469	1.51994
clust1	ENSG00000136518	1.7984	-1.10826	-1.05777	-0.323209	-0.431459	-0.37019	-0.65274	-0.360981	-0.219883	-0.579398	-0.224263	-0.0696496	-0.573675	-0.392248	-0.65365	1.69011	1.79818	1.73068
clust1	ENSG00000135829	2.51177	-1.02581	-0.915944	-0.0374071	-0.0583376	-0.158148	-0.592879	-0.757316	-0.477503	-0.262385	-0.250969	-0.360368	-0.518373	-0.673966	-0.708994	1.37721	1.43846	1.47096
clust1	ENSG00000153922	2.05156	-1.39456	-0.721551	-0.318493	-0.252314	-0.277606	-0.475011	-0.980167	-0.346601	-0.168781	-0.180518	-0.410198	-0.379402	-0.678592	-0.315185	1.54392	1.60914	1.69436
clust1	ENSG00000118246	1.82882	-0.92004	-1.04134	-0.248177	0.0258449	-0.173619	-0.766439	-1.34555	-0.619261	-0.33734	-0.099756	-0.381355	-0.177471	-0.248871	-0.459878	1.83862	1.48945	1.63635
clust1	ENSG00000089048	2.00719	-1.3458	-1.42077	-0.257886	-0.24612	-0.288857	-0.466071	-0.664155	-0.426568	-0.392436	-0.0735208	-0.322308	-0.396251	-0.0482286	-0.378869	1.65044	1.74409	1.32612
clust1	ENSG00000128708	2.19774	-1.0369	-1.22827	-0.129741	-0.0442355	-0.22901	-0.878309	-0.832607	-0.538446	-0.222703	-0.229833	-0.435101	-0.432959	-0.177607	-0.390521	1.59273	1.58796	1.42781
clust1	ENSG00000115355	1.87808	-0.875926	-0.692946	-0.755959	-0.724997	-0.57669	-0.782894	-0.888212	-0.703892	-0.274261	-0.479413	-0.523332	0.363053	0.0041373	0.0824804	1.73154	1.58826	1.63098
clust1	ENSG00000125482	1.89209	-0.901644	-0.47916	-0.280403	-0.671027	-0.75047	-0.60634	-0.911277	-0.985134	-0.517153	-0.252186	-0.408484	0.0835647	-0.0736688	-0.201969	1.65378	1.6088	1.80067
clust1	ENSG00000151304	2.15383	-0.803413	-0.846649	-0.920047	-0.470989	-1.07155	-0.44098	-1.1638	-0.521824	-0.122259	0.152989	-0.332041	0.175904	0.055217	-0.283351	1.29637	1.37185	1.77075
clust1	ENSG00000197170	1.84966	-1.41547	-1.11766	-0.763439	-0.702584	-0.732092	-0.375681	-0.786401	-0.511821	-0.103874	0.225191	0.01853	0.04322	-0.28407	-0.0849687	1.62607	1.70527	1.41011
clust1	ENSG00000106701	0.779688	-1.29803	-0.908117	-0.624661	-0.399173	-0.500883	0.189034	-0.333129	-0.368397	0.127234	-0.008901	-0.124353	-0.748526	-0.462463	-1.03781	1.83617	2.00824	1.87408
clust1	ENSG00000120694	0.749408	-1.05121	-1.10874	-0.776862	-0.736439	-0.837914	0.046597	-0.261368	0.154273	-0.12491	-0.0940145	-0.0940704	-0.465572	-0.526197	-0.666636	1.95778	1.90036	1.93552
clust1	ENSG00000111834	1.1892	-0.78983	-0.813662	-0.189787	-0.747696	-0.909731	0.0386289	-0.746727	0.235225	-0.730872	-0.646723	0.467319	-0.556182	-0.548218	-0.462772	0.870065	1.96411	2.37765
clust1	ENSG00000123307	1.28461	-0.510099	-0.510099	-0.510099	-0.510099	-0.510099	-0.307022	-0.510099	-0.510099	-0.510099	-0.510099	-0.510099	-0.510099	-0.510099	-0.510099	1.00044	2.17564	2.47762
clust1	ENSG00000149635	1.31873	-0.508345	-0.508345	-0.508345	-0.508345	-0.508345	-0.508345	-0.229409	-0.508345	-0.508345	-0.508345	-0.508345	-0.508345	-0.508345	-0.508345	0.793959	2.52816	2.19703
clust1	ENSG00000181544	2.22033	0.189517	-0.439097	-0.0574158	-0.194252	0.172969	-1.10032	-1.10262	-0.852406	0.448433	0.28241	0.108011	-1.24687	-0.913547	-1.17996	1.4319	1.1138	1.11912
clust1	ENSG00000269825	1.53425	0.108389	-0.358128	0.0547056	-0.360854	0.166307	-0.369231	-1.59165	-0.506338	0.382932	-0.268039	0.171149	-1.43596	-0.627441	-1.36913	1.76978	1.16785	1.53141
clust1	ENSG00000118412	2.61549	-1.03806	-1.09308	-0.037779	0.160318	0.064041	-0.768381	-1.16827	-0.623305	0.132103	-0.168859	-0.0951626	-0.502848	-0.762087	-0.365032	1.27711	1.04288	1.33092
clust1	ENSG00000163781	2.09507	-0.844315	-0.758705	0.126525	0.131343	0.0961187	-0.864443	-1.09578	-0.863893	0.0597633	-0.0161987	0.0197282	-0.8897	-0.990617	-0.601468	1.49009	1.41916	1.48733
clust1	ENSG00000108055	2.49932	-0.449931	-0.428303	-0.0120797	0.0920738	0.108306	-0.408948	-0.434182	-0.194675	-0.459775	-0.415229	-0.573246	-1.15492	-1.05963	-1.14836	1.23168	1.46117	1.34672
clust1	ENSG00000123737	1.93435	-0.0525433	-0.29697	-0.0984941	-0.146001	-0.269225	-0.584056	-0.69492	-0.417636	-0.582476	-0.628756	-0.439721	-0.952458	-1.04396	-0.77969	1.72338	1.76642	1.56276
clust1	ENSG00000133302	1.95734	-0.417766	-0.145149	0.136902	0.0552145	0.342211	-0.914934	-0.994658	-0.962326	-0.205253	-0.472719	-0.473908	-0.841203	-0.794185	-0.938762	1.32434	1.56268	1.78218
clust1	ENSG00000137770	2.47667	-0.574411	-0.434219	0.00592425	0.055545	0.148188	-0.77944	-1.12696	-0.951803	-0.252758	-0.383402	-0.419487	-0.768772	-0.640164	-0.524198	1.29904	1.24813	1.62212
clust1	ENSG00000092140	2.36195	-0.0699055	-0.356128	-0.174822	0.0231292	-0.154712	-0.847415	-1.4874	-0.817582	-0.222258	-0.31444	-0.155747	-0.74053	-0.583254	-0.714881	1.54305	1.29315	1.4178
clust1	ENSG00000111581	2.44595	-0.190667	-0.274005	-0.296157	-0.215651	-0.327012	-0.937544	-0.874392	-0.838287	-0.31862	-0.343928	-0.39389	-0.526621	-0.594426	-0.791849	1.49902	1.53525	1.44282
clust1	ENSG00000120800	2.27222	-0.486176	-0.359273	-0.208522	-0.180047	-0.348974	-0.683867	-0.975732	-0.425932	0.0595566	-0.0150765	-0.102946	-0.876943	-1.09018	-1.03322	1.42845	1.43432	1.59235
clust1	ENSG00000175216	1.82063	-0.28457	-0.235592	-0.356054	-0.340173	-0.435032	-0.58985	-1.13693	-0.610768	-0.143593	-0.19679	-0.373045	-0.632919	-0.991345	-0.693937	1.73792	1.6152	1.84685
clust1	ENSG00000257950	2.04774	0.110821	0.4108	-0.0181665	-0.574857	0.0103967	0.119269	-0.102617	-0.984254	-0.760623	-1.0027	-0.894334	-1.23432	-0.821876	-0.51081	0.993407	2.00094	1.21117
clust1	ENSG00000143032	1.9537	-0.497134	-0.497134	-0.497134	-0.497134	-0.497134	-0.497134	-0.207415	-0.497134	-0.497134	-0.497134	-0.497134	-0.497134	-0.497134	-0.497134	0.852969	2.86351	0.99997
clust1	ENSG00000116120	1.64304	-0.253508	-0.255741	-0.442513	-0.559764	-0.458656	-0.670479	-0.37177	-0.697021	-0.177188	-0.0219664	0.0212085	-0.974186	-0.900691	-1.1355	1.58338	1.99242	1.67894
clust1	ENSG00000164687	1.87339	-0.00979022	-0.216766	-0.224234	-0.17792	-0.29406	-0.623499	0.177237	-0.715031	-0.768661	-0.448583	-0.337463	-1.39392	-0.582831	-1.11874	1.54363	1.75458	1.56266
clust1	ENSG00000125944	1.74805	-0.330422	-0.208341	-0.350633	-0.412194	-0.593265	-0.656759	-0.817069	-0.737939	-0.330972	-0.396378	-0.136062	-0.654365	-0.575393	-0.917992	1.83571	1.73708	1.79694
clust1	ENSG00000143401	2.11209	-0.406048	-0.317957	-0.550829	-0.634652	-0.612626	-0.542841	-0.810295	-0.435695	-0.260781	-0.500621	-0.238067	-0.606237	-0.572552	-0.677259	1.69992	1.72866	1.62579
clust1	ENSG00000164163	1.98112	-0.490409	-0.452275	-0.486538	-0.476386	-0.696513	-0.620502	-0.575206	-0.632115	-0.40887	-0.537148	-0.34725	-0.380519	-0.455424	-0.67111	1.78941	1.72206	1.73767
clust1	ENSG00000066557	1.89846	-0.510437	-0.479602	-0.570419	-0.478107	-0.64407	-0.179739	-0.511378	-0.343864	-0.497417	-0.360925	-0.539028	-0.63841	-0.853297	-0.592982	1.7793	1.78372	1.73819
clust1	ENSG00000080824	2.17518	-0.719987	-0.676573	-0.487826	-0.517805	-0.52438	-0.0941419	-0.243679	-0.0681597	-0.44824	-0.380334	-0.372289	-0.873626	-0.742725	-0.88083	1.6187	1.66962	1.5671
clust1	ENSG00000213096	3.17797	-0.00254102	-0.128566	-0.824606	-0.777775	-0.81088	-0.450065	-0.899452	-0.59747	-0.595107	-0.540509	-0.525412	0.0418234	0.175834	-0.0319057	1.05725	0.854168	0.877236
clust1	ENSG00000123505	2.89865	-0.18492	-0.211861	-0.609163	-0.666603	-0.744667	-0.376934	-0.953708	-0.460405	-0.45666	-0.401703	-0.448896	-0.329348	-0.285479	-0.564192	1.23156	1.30271	1.26162
clust1	ENSG00000109606	2.85607	-0.376116	-0.574539	-0.258156	-0.349357	-0.344577	-0.831263	-1.1007	-0.783823	-0.329658	-0.22007	-0.320982	-0.226302	-0.410429	-0.521284	1.28354	1.21015	1.29749
clust1	ENSG00000130935	2.77264	-0.360108	-0.489787	-0.456488	-0.339991	-0.218576	-0.730571	-0.805296	-0.56155	-0.354471	-0.358516	-0.443561	-0.534281	-0.602043	-0.613692	1.42251	1.34099	1.33279
clust1	ENSG00000164134	2.69024	-0.53487	-0.48334	-0.481744	-0.449721	-0.563103	-0.451543	-0.852842	-0.626759	-0.195057	-0.0323697	-0.163113	-0.67342	-0.727003	-0.608254	1.36045	1.39222	1.40023
clust1	ENSG00000178074	2.55464	-0.380286	-0.288756	-0.678737	-0.746818	-0.316066	-0.4723	-1.16978	-0.652666	-0.264506	-0.32985	-0.306667	-0.2989	-0.590715	-0.377556	1.3404	1.38015	1.59841
clust1	ENSG00000152785	1.39067	-0.706773	0.774148	-0.706773	-0.706773	-0.706773	-0.706773	-0.706773	-0.383007	-0.706773	-0.407009	-0.120082	-0.706773	0.0936439	-0.706773	2.43959	0.854264	1.71874
clust1	ENSG00000139220	1.57959	-0.242014	0.050455	-0.80839	-0.80839	-0.80839	-0.147765	-0.241908	0.120412	-0.514628	-0.71227	-0.528609	-0.761127	-0.80839	-0.555656	1.75396	1.07401	2.35911
clust1	ENSG00000171864	1.64452	-0.185944	0.709817	-0.695209	-0.695209	-0.695209	0.00536182	-0.695209	-0.198548	-0.695209	-0.695209	-0.695209	-0.695209	-0.695209	-0.695209	2.27269	1.17451	1.52969
clust1	ENSG00000185947	1.84771	-0.427575	0.105324	-0.885605	-0.704666	-0.0760395	-0.240935	-0.728115	-0.137337	-1.00353	-0.585759	-0.913263	-0.542551	-0.240203	-0.552376	1.79296	1.75494	1.53702
clust1	ENSG00000143493	1.91942	-0.0788344	0.0402887	-1.1164	-1.02909	-0.525572	-0.49689	-0.788294	-0.550707	-0.222002	-0.3181	-0.47216	-0.290826	-0.605865	-0.493462	1.67869	1.50508	1.84472
clust1	ENSG00000164338	1.87941	-0.0375617	0.0357394	-1.18064	-0.895073	-1.15208	-0.467634	-0.508497	-0.242139	-0.255463	-0.179547	-0.420452	-0.53158	-0.35719	-0.663449	1.52748	1.7591	1.68958
clust1	ENSG00000104290	1.77025	-0.412325	-0.275525	-0.777986	-1.16673	-0.913524	-0.21074	-0.374126	0.0695024	-0.239764	-0.382221	-0.580415	-0.690593	-0.59203	-0.433675	1.71451	1.63447	1.86092
clust1	ENSG00000156531	1.75211	-0.266751	-0.518108	-0.556422	-0.652392	-1.0228	-0.509095	-0.747793	-0.361159	-0.281451	-0.53488	-0.570367	-0.460847	-0.315843	-0.35326	1.82978	1.69844	1.87084
clust1	ENSG00000057657	-0.861333	-0.464757	-0.509935	-1.27946	-1.03422	-1.0443	-0.662246	-0.600633	-0.765953	0.234118	1.12586	0.447329	-0.193873	0.253027	0.337738	1.28002	1.52756	2.21107
clust1	ENSG00000136167	0.162031	-0.374359	0.182996	-1.12681	-1.22537	-1.23417	-0.973961	-0.905182	-1.2158	0.148381	0.763706	0.738278	-0.0580573	0.273594	-0.034273	1.71388	1.3782	1.78692
clust1	ENSG00000010818	0.085738	-1.14501	-0.937028	-0.859336	-0.802168	-0.766787	-1.09625	-1.25508	-0.817961	0.788865	0.52305	0.544285	0.261312	0.150326	0.543078	1.42077	1.41755	1.94465
clust1	ENSG00000143512	-0.316066	-1.51284	-0.873052	-0.682954	-0.635872	-0.123124	-0.990982	-0.493763	-0.69442	0.253356	0.199641	1.26566	-0.0610472	-0.177976	-0.193529	1.09306	1.46973	2.47417
clust1	ENSG00000176040	-0.0341285	-0.673061	-0.673061	-0.0893298	-0.673061	-0.673061	-0.673061	-0.673061	-0.673061	-0.673061	-0.673061	-0.148913	1.36179	-0.673061	0.449203	0.896668	2.56802	1.7273
clust1	ENSG00000145040	-0.91216	-0.553903	-0.91216	0.108646	-0.179039	-0.91216	-0.91216	-0.91216	0.40531	0.351961	-0.91216	-0.593607	0.29118	-0.339562	0.386314	2.10175	2.01733	1.47658
clust1	ENSG00000205683	-0.395185	-0.773727	-0.799013	-0.0282391	-0.360489	-0.547139	-0.440927	-0.594648	-0.249701	-0.689415	-0.651355	-0.953477	-0.275216	0.175137	0.539546	1.68887	2.289	2.06598
clust1	ENSG00000144191	-0.413943	-0.413943	-0.413943	-0.413943	-0.413943	-0.413943	-0.413943	-0.413943	-0.413943	-0.413943	-0.413943	-0.413943	-0.413943	-0.413943	-0.413943	1.27352	3.02803	1.9076
clust1	ENSG00000137745	-0.285357	-0.517077	-0.517077	-0.517077	-0.517077	-0.443003	-0.318679	-0.194956	-0.0487066	-0.517077	-0.517077	-0.452146	-0.517077	-0.517077	-0.517077	1.66409	2.33165	2.4008
clust1	ENSG00000125492	-0.514943	-0.514943	-0.382151	-0.286941	-0.514943	-0.514943	-0.514943	-0.514943	-0.0789917	-0.299592	-0.514943	-0.410816	-0.310389	-0.514943	-0.514943	1.64842	2.346	2.40894
clust1	ENSG00000163518	-0.427354	-0.427354	-0.427354	-0.427354	-0.427354	-0.427354	-0.427354	-0.427354	-0.427354	-0.427354	-0.427354	-0.427354	-0.427354	-0.427354	-0.427354	1.54022	2.31391	2.55618
clust1	ENSG00000119927	1.1236	-0.436247	-0.501634	-1.13369	-0.771335	-0.758923	-0.41471	-0.829078	-0.340601	-0.586482	-0.767176	-0.899941	0.475119	0.204653	0.238221	1.82477	1.58341	1.99004
clust1	ENSG00000151466	0.572161	-0.413049	-0.357959	-0.72644	-0.369541	-0.490275	-0.673852	-1.36587	-0.86247	-0.757907	-0.570985	-0.921654	0.376904	0.483154	0.635333	1.77727	1.85732	1.80786
clust1	ENSG00000072041	1.10368	0.230587	0.109208	-0.921563	-0.966988	-1.16995	-1.13966	-1.48263	-1.08224	-0.164954	-0.387798	0.0557468	0.393024	0.536446	0.244329	1.4752	1.48406	1.68349
clust1	ENSG00000206560	1.82641	0.336482	0.282259	-0.728296	-0.785498	-0.719664	-1.25581	-1.27177	-0.963072	-0.533732	-0.727567	-0.919982	0.854532	0.331454	0.39518	1.23693	1.26297	1.37918
clust1	ENSG00000163584	1.28771	-0.0506119	0.147708	-0.408655	-0.381161	-0.594134	-1.09636	-0.799659	-1.39271	-1.31349	-0.886479	-1.0426	0.85981	1.19665	0.925504	1.13497	1.35581	1.0577
clust1	ENSG00000241343	1.98616	0.0897734	-0.609068	-0.744122	-0.163025	-1.36137	-1.19264	-0.303401	-0.613201	-1.26129	-0.722764	-0.405512	0.54427	0.354442	0.465495	1.55919	1.48817	0.888884
clust1	ENSG00000122565	0.642107	-2.12416	-2.087	0.534978	0.403339	0.513217	-0.861045	-0.762438	-0.936524	-0.217669	-0.0860421	-0.0677883	0.53463	0.776576	0.429707	1.14617	1.19134	0.970605
clust1	ENSG00000187240	1.62967	-1.82175	-1.43332	-0.0590818	0.287204	0.22226	-0.927993	-1.0501	-0.880992	-0.424396	-0.635562	-0.453394	1.26318	0.829473	0.895619	0.793785	0.756659	1.00875
clust1	ENSG00000153207	1.81566	-1.77925	-1.44211	0.024857	0.266536	0.0176138	-0.646234	-1.02543	-0.52586	0.227044	0.0343013	0.104017	-0.233786	-0.55459	-0.500021	1.30071	1.35924	1.5573
clust1	ENSG00000163714	1.56017	-1.79306	-1.65374	0.635282	0.625965	0.707665	-0.808833	-1.33186	-0.72319	-0.0521396	-0.216561	-0.364247	0.106009	-0.126079	-0.087822	1.23186	1.07237	1.21821
clust1	ENSG00000152193	0.285997	-1.09357	-2.2399	0.22857	0.131413	0.00919101	-0.233132	-0.480741	0.041565	-0.480375	-0.248915	-0.666369	-0.219976	-0.0918227	-0.272935	1.81954	1.80276	1.7087
clust1	ENSG00000074266	0.454446	-1.54475	-1.56973	0.620841	0.245568	0.223195	-0.746611	-0.850816	-0.585719	-0.540495	0.109771	-0.0525806	-0.333309	-0.39849	-0.272847	1.82588	1.75673	1.65892
clust1	ENSG00000198604	0.910586	-1.64726	-1.68691	-0.000747998	0.0187521	0.0104792	-0.761716	-1.05414	-0.640729	-0.0167153	-0.0180758	0.0123013	-0.141987	0.0793829	-0.103745	1.64479	1.71378	1.68194
clust1	ENSG00000198064	2.41323	1.01197	0.353002	0.273992	-0.357691	0.202511	0.347694	-0.946976	0.684534	-1.05825	0.759623	-0.360244	-0.680508	-2.004	-1.23013	-0.262998	0.576011	0.27823
clust1	ENSG00000135049	2.52983	0.616369	0.262319	0.314274	0.276018	0.561527	-0.118397	-0.390758	0.354047	0.208658	-0.0144264	-0.184806	-1.60248	-1.73794	-1.86717	0.227316	0.331177	0.234438
clust1	ENSG00000102053	1.65004	0.775945	-0.366261	0.799414	0.738743	0.572731	-0.106707	-0.217511	0.513616	0.919508	0.103859	0.399598	-2.20331	-1.67583	-1.50605	-0.673834	-0.227045	0.503095
clust1	ENSG00000107679	1.8095	0.386774	0.37884	0.477271	0.231302	0.465036	0.611939	0.151861	0.800761	0.378289	0.226265	0.504086	-1.91437	-1.9251	-1.97528	-0.346014	-0.234235	-0.0269226
clust1	ENSG00000152818	1.89498	0.190437	0.234504	0.549644	0.601371	0.779557	-0.000881802	-0.397179	0.265152	0.989842	0.734127	0.54538	-1.60085	-2.09002	-1.61217	-0.271936	-0.591095	-0.220867
clust1	ENSG00000165209	2.20929	1.58381	1.70735	0.0882447	0.0765101	0.0784365	-0.306924	-0.334587	-0.14413	-0.193703	-0.220309	-0.238941	-1.45499	-1.47985	-1.41193	0.0206921	-0.037231	0.058255
clust1	ENSG00000151718	1.75274	1.6825	1.73266	0.520271	0.490436	0.554622	-0.430973	-0.75222	-0.36793	-0.0293815	-0.0256448	-0.149577	-1.44642	-1.52684	-1.33536	-0.233496	-0.28657	-0.148806
clust1	ENSG00000102098	2.03363	1.74443	1.80504	0.42737	0.398268	0.250968	-0.587517	-0.688589	-0.601403	-0.145287	-0.225991	-0.352073	-1.46157	-1.05546	-1.21502	-0.027129	-0.219208	-0.0804657
clust1	ENSG00000150893	2.0891	1.61546	1.72114	0.516454	0.553603	0.506586	-0.347556	-0.691262	-0.462596	-0.451642	-0.468198	-0.499484	-1.24406	-1.24406	-1.24406	-0.184789	-0.25223	0.0876077
clust1	ENSG00000136104	1.76894	1.20621	1.2917	0.641095	0.517471	0.401618	-0.763948	-0.342358	-0.72903	-0.304634	0.020508	-0.46723	-1.55361	-1.50316	-1.68497	0.703207	0.537157	0.26104
clust1	ENSG00000154639	2.09356	1.26479	1.32508	0.202211	0.126952	0.190351	-0.177808	-0.402015	-0.261926	-0.417512	-0.39758	-0.391546	-1.50752	-1.63187	-1.61826	0.511855	0.612379	0.478866
clust1	ENSG00000165061	2.0615	1.40769	1.5461	-0.0879898	0.179982	0.163051	-0.3917	-0.315736	-0.336246	-0.372919	-0.225241	-0.25827	-1.52721	-1.55132	-1.54752	0.412071	0.542798	0.300954
clust1	ENSG00000112149	1.80433	1.37065	1.28299	-0.355	0.300461	0.601546	-0.441172	-0.687139	-0.448566	0.536409	0.446525	1.01742	-1.477	-1.35074	-1.71757	-0.309971	-0.41856	-0.154617
clust1	ENSG00000178773	2.24751	1.57254	1.5067	0.0751247	0.254861	0.337061	-0.58347	-0.231279	-0.348048	0.207668	0.218754	0.251893	-1.76443	-0.977178	-1.13737	-0.279776	-0.67669	-0.673864
clust1	ENSG00000134755	2.62513	0.677618	0.686276	0.719696	0.529413	0.313593	-0.513599	-0.957368	-0.425252	0.555592	0.4754	0.501895	-1.20847	-1.28536	-1.59119	-0.52031	-0.44821	-0.13485
clust1	ENSG00000164841	2.55874	0.837668	0.939229	0.297235	-0.335341	0.199441	0.146578	-0.219513	0.0489998	0.226263	0.418297	0.671505	-1.5297	-1.60247	-1.61525	-0.356639	-0.358558	-0.326482
clust1	ENSG00000170345	3.67911	-0.0403521	-0.0906773	0.37666	0.490401	0.302337	0.0067715	-0.276211	-0.00849005	-0.652209	-0.198493	-0.626691	-0.75145	-0.916885	-0.715054	-0.168801	-0.298221	-0.111749
clust1	ENSG00000147059	3.72036	0.752753	-0.247939	-0.0696035	0.31143	0.142281	-0.0730599	-0.576631	-0.0801144	-0.207944	-0.135046	-0.192388	-0.535998	-0.765497	-0.618735	-0.476436	-0.343173	-0.604255
clust1	ENSG00000189108	3.39643	0.975569	-0.120236	0.406603	0.586579	0.432207	0.0034598	-0.231361	0.160597	-0.465789	-0.238837	-0.717079	-0.717079	-0.717079	-0.717079	-0.717079	-0.717079	-0.602749
clust1	ENSG00000258539	3.24888	1.06592	0.82857	-0.168313	1.14036	-0.157992	-0.589036	-0.589036	-0.589036	-0.589036	-0.589036	-0.589036	-0.589036	-0.244012	-0.589036	-0.589036	-0.180838	-0.231241
clust1	ENSG00000205277	3.31741	0.856923	0.933774	-0.0265897	0.480318	0.503967	-0.61997	-0.804581	-0.804581	-0.190471	0.0223509	-0.162378	-0.336698	-0.750388	-0.485818	-0.68406	-0.61272	-0.636487
clust1	ENSG00000110723	3.55482	0.536577	0.567198	0.548648	0.421139	0.314731	-0.576231	-0.640682	-0.535889	-0.242331	-0.34084	-0.263239	-0.551285	-0.634013	-0.688556	-0.487536	-0.522329	-0.460186
clust1	ENSG00000154080	3.22332	0.738744	0.6445	0.543996	0.867334	0.787284	-0.630404	-0.619813	-0.607948	-0.348625	-0.41266	-0.425401	-0.630404	-0.630404	-0.630404	-0.630404	-0.608306	-0.630404
clust1	ENSG00000174776	3.68367	-0.399912	1.20211	-0.399912	-0.399912	-0.209475	-0.399912	-0.399912	-0.399912	0.118006	-0.0630402	-0.399912	-0.399912	-0.399912	-0.399912	-0.399912	-0.399912	0.0676794
clust1	ENSG00000182798	3.81904	0.114368	0.714746	-0.236597	-0.419493	-0.419493	-0.419493	-0.419493	-0.419493	-0.0804801	0.215573	-0.255106	-0.419493	-0.419493	-0.419493	-0.252389	-0.419493	-0.263712
clust1	ENSG00000022355	3.88837	-0.111441	-0.129827	-0.0587089	-0.21616	0.23409	-0.463602	-0.300155	-0.463602	0.180535	0.210371	-0.201738	-0.463602	-0.41513	-0.406179	-0.356014	-0.463602	-0.463602
clust1	ENSG00000074803	3.96824	0.079842	-0.207203	-0.347595	-0.347595	-0.284772	-0.12033	-0.177836	0.127675	-0.289788	-0.235958	-0.347595	-0.292766	-0.29738	-0.288095	-0.347595	-0.347595	-0.243649
clust1	ENSG00000182070	3.95217	0.259387	0.174648	-0.292414	-0.292414	-0.292414	-0.292414	-0.292414	-0.292414	-0.292414	-0.292414	-0.292414	-0.292414	-0.292414	-0.292414	-0.292414	-0.292414	-0.292414
clust1	ENSG00000164049	3.28431	0.973957	0.386698	-0.590255	-0.188056	0.473176	-0.850409	-0.503262	0.317228	-0.849171	0.426692	-0.0924868	-0.97111	-0.760674	-0.845624	-0.18413	-0.365371	0.338493
clust1	ENSG00000107593	3.6663	1.22857	0.144294	-0.169433	0.10119	-0.417518	-0.417518	-0.417518	-0.417518	-0.183483	-0.417518	-0.194731	-0.417518	-0.417518	-0.417518	-0.417518	-0.417518	-0.417518
clust1	ENSG00000047457	3.46527	1.50405	0.44833	-0.195185	-0.355357	-0.27395	-0.224351	-0.472983	-0.551072	0.0237367	-0.0751858	-0.161983	-0.478904	-0.419232	-0.640464	-0.640464	-0.465314	-0.486946
clust1	ENSG00000137558	3.61978	1.12672	0.536661	-0.447276	-0.39028	-0.545643	-0.499528	-0.499823	-0.448661	-0.053829	-0.152637	-0.0767104	-0.414123	-0.505162	-0.545643	-0.323882	-0.35641	-0.0235496
clust1	ENSG00000164089	3.2204	1.72423	1.01744	-0.49494	-0.326463	-0.49494	-0.346019	-0.49494	-0.415525	-0.271542	-0.278541	-0.0161831	-0.49494	-0.49494	-0.49494	-0.49494	-0.416787	-0.426425
clust1	ENSG00000170419	3.22312	1.63011	1.17429	-0.443886	-0.443886	-0.443886	-0.443886	-0.443886	-0.274574	-0.362474	-0.443886	-0.0638366	-0.443886	-0.443886	-0.443886	-0.443886	-0.443886	-0.443886
clust1	ENSG00000106511	3.28039	1.70447	0.955199	-0.414149	-0.414149	-0.414149	-0.414149	-0.141981	-0.414149	-0.414149	-0.414149	-0.414149	-0.414149	-0.414149	-0.414149	-0.414149	-0.414149	-0.414149
clust1	ENSG00000144285	3.43461	1.51295	0.825364	-0.407404	-0.407404	-0.407404	-0.351016	-0.407404	-0.347844	-0.350435	-0.379793	-0.407404	-0.407404	-0.407404	-0.407404	-0.324852	-0.378052	-0.3817
clust1	ENSG00000152214	3.45787	1.50279	0.758388	-0.393045	-0.393045	-0.393045	-0.393045	-0.393045	-0.393045	-0.393045	-0.393045	-0.393045	-0.393045	-0.393045	-0.216422	-0.393045	-0.393045	-0.393045
clust1	ENSG00000183960	3.45772	1.27406	0.950023	-0.449459	-0.394615	-0.200906	-0.0627662	-0.242392	-0.255635	-0.272429	-0.543039	-0.544968	-0.620894	-0.520607	-0.261619	-0.467468	-0.535815	-0.309183
clust1	ENSG00000212807	3.31467	1.5818	0.916749	-0.496131	-0.0439085	-0.272116	-0.165943	-0.51212	-0.136625	-0.508684	-0.367385	-0.568396	-0.51939	-0.272707	-0.449721	-0.367485	-0.556228	-0.576378
clust1	ENSG00000100122	3.36208	1.55086	0.22389	-0.538478	-0.0543039	-0.538478	-0.538478	0.632642	-0.306189	-0.538478	-0.117977	-0.326604	-0.538478	-0.538478	-0.538478	-0.118095	-0.538478	-0.538478
clust1	ENSG00000180777	3.64543	1.11685	-0.122056	-0.547047	-0.547047	-0.547047	0.0250721	0.0214803	0.174087	0.0308596	-0.547047	-0.435088	-0.547047	-0.547047	-0.547047	-0.208479	-0.187288	-0.231531
clust1	ENSG00000166148	3.75109	0.33308	0.724565	-0.44569	-0.44569	-0.44569	-0.44569	-0.44569	0.0631979	-0.44569	-0.44569	0.246322	-0.44569	-0.44569	-0.44569	-0.208977	-0.44569	-0.00667963
clust1	ENSG00000198739	3.61118	0.87466	0.310327	-0.393961	-0.636606	-0.636606	-0.298347	-0.52351	-0.279536	0.0372873	0.12153	0.415023	-0.419429	-0.636606	-0.636606	-0.636606	0.0561724	-0.328367
clust1	ENSG00000155307	3.82115	0.202071	0.713173	-0.356137	-0.351909	-0.428906	-0.0969109	0.0279276	-0.147095	-0.428906	-0.428906	-0.428906	-0.428906	-0.428906	-0.428906	-0.296839	-0.0841823	-0.428906
clust1	ENSG00000180347	3.56619	0.487353	1.12974	-0.561609	-0.561609	-0.561609	-0.111561	0.318314	-0.0866033	-0.377898	-0.295754	-0.561609	-0.561609	-0.561609	-0.561609	-0.208401	-0.0940983	-0.396012
clust1	ENSG00000204612	3.45456	0.525226	1.58838	-0.402091	-0.402091	-0.402091	-0.402091	-0.402091	0.06111	-0.402091	-0.402091	-0.402091	-0.402091	-0.402091	-0.402091	-0.402091	-0.402091	-0.402091
clust1	ENSG00000165091	3.57213	0.498954	1.26971	-0.50643	-0.50643	-0.50643	-0.0334378	-0.222506	-0.405131	-0.409536	0.046906	-0.322633	-0.142422	-0.50643	-0.406703	-0.50643	-0.406751	-0.50643
clust1	ENSG00000184933	3.58656	0.283846	1.4452	-0.374333	-0.374333	-0.374333	-0.374333	-0.374333	-0.374333	-0.374333	-0.0749521	-0.374333	-0.374333	-0.374333	-0.374333	-0.374333	-0.374333	-0.374333
clust1	ENSG00000104327	3.58174	1.01659	0.938527	-0.549468	-0.549468	-0.498908	-0.385856	-0.503666	-0.289433	-0.41319	-0.348002	-0.324574	-0.31212	-0.380093	-0.321558	-0.15438	-0.144889	-0.361248
clust1	ENSG00000160593	3.57497	0.919606	0.932583	-0.455682	-0.455682	-0.455682	-0.455682	-0.311309	-0.455682	-0.455682	-0.455682	-0.455682	-0.455682	-0.455682	-0.455682	-0.313644	0.141869	0.0684287
clust1	ENSG00000169856	3.64177	0.901977	0.879641	-0.416255	-0.443119	-0.443119	-0.443119	-0.39353	-0.364485	-0.392702	-0.346431	-0.395127	-0.395281	-0.443119	-0.443119	-0.32286	-0.100634	-0.0804871
clust1	ENSG00000004948	3.60091	0.755822	1.13421	-0.387248	-0.475166	-0.475166	-0.352845	-0.161737	-0.222535	-0.475166	-0.394848	-0.396182	-0.396435	-0.475166	-0.475166	-0.355546	-0.226422	-0.221314
clust1	ENSG00000132681	3.44844	0.900813	1.34579	-0.510253	-0.510253	-0.510253	-0.422632	1.80968e-05	-0.417711	-0.334062	-0.339693	-0.259828	-0.510253	-0.510253	-0.510253	-0.424598	-0.239757	-0.19526
clust1	ENSG00000172461	3.40352	1.25472	1.1335	-0.506553	-0.506553	-0.506553	-0.254974	-0.131127	-0.0942611	-0.49108	-0.447036	-0.506553	-0.506553	-0.506553	-0.506553	-0.260448	-0.290083	-0.276858
clust1	ENSG00000183117	3.44436	1.27126	0.984664	-0.572582	-0.543284	-0.51595	-0.317949	-0.369522	-0.172762	-0.239785	-0.348085	-0.327657	-0.572582	-0.572582	-0.572582	-0.177867	-0.282085	-0.115016
clust1	ENSG00000119547	3.67967	0.747022	0.67312	-0.452741	-0.542803	-0.403665	-0.481553	-0.545828	-0.321708	-0.480674	-0.339648	-0.403608	-0.364055	-0.417712	-0.500294	0.0715651	-0.155867	0.238781
clust1	ENSG00000133863	3.69835	0.675271	0.604699	-0.253995	-0.37925	-0.386362	-0.513696	-0.473608	-0.508267	-0.403735	-0.346167	-0.517426	-0.491456	-0.586792	-0.453291	0.0318955	0.0912139	0.212617
clust1	ENSG00000113100	3.79017	0.580188	0.704743	-0.367719	-0.367719	-0.367719	-0.367719	-0.367719	-0.367719	-0.141577	-0.367719	-0.367719	-0.153175	-0.367719	-0.367719	-0.367719	-0.367719	-0.367719
clust1	ENSG00000188984	3.75405	0.302204	1.04098	-0.339816	-0.339816	-0.339816	-0.339816	-0.339816	-0.339816	-0.339816	-0.339816	-0.339816	-0.339816	-0.339816	-0.339816	-0.339816	-0.339816	-0.339816
clust1	ENSG00000198963	3.72095	0.794318	0.734515	-0.507382	-0.527202	-0.407402	-0.347262	-0.31389	-0.355862	-0.293059	-0.266929	-0.370892	-0.388296	-0.46279	-0.358454	-0.233989	-0.268856	-0.147522
clust1	ENSG00000255639	3.79394	0.815001	0.441231	-0.362533	-0.362533	-0.362533	-0.166892	-0.362533	-0.362533	-0.362533	-0.362533	-0.362533	-0.362533	-0.362533	-0.362533	-0.362533	-0.260112	-0.272772
clust1	ENSG00000099715	3.60163	0.905171	0.988224	-0.446598	-0.446598	-0.446598	-0.40552	-0.446598	-0.446598	-0.241213	-0.169585	-0.212525	-0.446598	-0.446598	-0.446598	-0.36649	-0.446598	-0.0803101
clust1	ENSG00000101842	3.58914	0.952096	0.979696	-0.479459	-0.224287	-0.152557	-0.479459	-0.479459	-0.479459	-0.402266	-0.117026	-0.479459	-0.406222	-0.346182	-0.400019	-0.479459	-0.321957	-0.273662
clust1	ENSG00000104889	3.42036	0.363329	-0.636358	0.352732	-0.636358	-0.288296	-0.636358	-0.636358	-0.636358	-0.636358	-0.0241283	-0.0341562	-0.636358	-0.636358	-0.636358	0.83373	0.626549	0.47711
clust1	ENSG00000196466	2.8549	0.472374	-0.0862989	0.0385843	-0.335384	0.0762658	-1.3448	-1.20742	-1.17691	-0.34819	0.551496	-0.0647044	-0.650814	-0.403252	-0.83476	1.0912	0.616479	0.751237
clust1	ENSG00000213799	3.23358	0.63559	0.247996	-0.409805	-0.295445	-0.359236	-0.928808	-0.993243	-0.703165	-0.138507	-0.0800455	-0.402651	-0.903028	-0.562839	-0.455955	1.07564	0.269974	0.769951
clust1	ENSG00000085563	2.86523	1.34289	0.107808	-0.113898	-0.625333	-0.0961766	-0.258206	-0.854817	-0.747348	-0.350333	-0.656727	-0.2807	-0.854817	-0.854817	-0.854817	1.39241	0.63199	0.20766
clust1	ENSG00000168263	2.94376	1.54501	-0.0174414	-0.18613	-0.531571	0.406138	-0.824319	-0.637476	-0.589998	0.274559	0.0581737	-0.30523	-0.308621	-1.24815	-1.0051	1.00816	-0.220671	-0.361097
clust1	ENSG00000138039	2.55546	1.29069	0.980224	-0.898125	-0.303808	0.513466	-0.898125	-0.898125	-0.344112	1.39219	-0.384903	0.0998331	-0.898125	-0.898125	-0.898125	0.362634	-0.352898	-0.420025
clust1	ENSG00000177463	2.80376	0.721017	0.847755	-0.317473	0.749044	0.465491	-1.54256	-0.973573	-0.993221	0.735325	-0.549109	0.472603	-0.412344	-0.983784	-0.48492	-0.249264	-0.432157	0.143408
clust1	ENSG00000135913	3.07295	0.529221	0.65564	0.234401	0.346214	-0.0705609	-1.40322	-1.39424	-0.974937	0.186177	-0.044154	0.0746766	-0.333499	-0.603697	-0.978591	0.140384	0.00776007	0.555473
clust1	ENSG00000160229	3.45785	0.755519	0.791348	-0.240045	-0.15437	-0.180062	-0.935098	-1.09187	-0.872394	-0.0199967	-0.306011	-0.31775	-0.538556	-0.544311	-0.182558	0.278025	0.112371	-0.012087
clust1	ENSG00000198346	3.05456	1.16544	1.05056	0.354943	-0.0644861	0.0736879	-1.28182	-0.900253	-0.899732	-0.509759	-0.338929	-0.27333	-0.716403	-0.531975	-0.481816	0.391031	-0.340975	0.249256
clust1	ENSG00000203326	3.2194	1.17825	1.08381	0.0988401	-0.0373644	-0.1018	-1.02306	-0.778916	-0.877647	-0.128746	-0.0317092	-0.0488668	-0.633893	-0.623762	-0.851299	-0.109504	-0.276634	-0.0571019
clust1	ENSG00000180611	2.24176	0.746265	1.30643	0.626165	0.164756	0.26813	-1.56881	-1.22029	-1.23326	0.28251	0.643961	0.476597	-1.33012	-0.892127	-0.666799	-0.0263954	0.0958408	0.0853862
clust1	ENSG00000186472	3.03561	0.616258	0.640559	0.0545299	0.238371	0.384578	-1.08469	-1.15045	-0.978223	0.391681	0.59187	0.608123	-0.982419	-0.627836	-0.842653	-0.0828338	-0.565007	-0.247471
clust1	ENSG00000242950	3.16937	0.758531	0.646845	0.162237	0.0661561	0.0360866	-0.615145	-0.473566	-0.598778	1.30971	0.0714344	-0.213543	-0.627284	-0.908094	-0.755043	-0.764202	-0.755118	-0.509592
clust1	ENSG00000183091	3.38621	0.0306268	-0.288196	0.550596	0.0771402	0.417918	-0.431405	-1.08119	-0.581359	0.496479	0.944069	-0.116588	-0.513019	-0.700442	-0.762628	-0.339861	-0.741976	-0.34638
clust1	ENSG00000198515	2.92352	0.596107	0.67011	1.20132	-0.475758	0.180302	-0.700509	-0.701121	-0.796699	0.589256	0.841711	0.0671956	-0.796699	-0.796699	-0.796699	-0.610139	-0.598503	-0.796699
clust1	ENSG00000159450	3.2575	0.652069	0.520655	-0.0483586	-0.556062	-0.105934	-0.71866	-0.71866	-0.71866	-0.431194	1.00114	0.974944	-0.6496	-0.346137	-0.569467	-0.578363	-0.56954	-0.395673
clust1	ENSG00000105877	3.07017	0.976637	1.14768	-0.619796	-0.64157	-0.697377	-0.72464	-0.802133	-0.670398	0.714772	0.256299	0.251791	-0.714461	-0.778447	-0.800685	0.0123157	0.0606054	-0.040767
clust1	ENSG00000087128	3.42713	0.945665	0.370319	-0.55359	-0.55359	-0.55359	-0.55359	-0.55359	-0.55359	0.633725	0.676356	0.18658	-0.259421	-0.55359	-0.444455	-0.55359	-0.55359	-0.55359
clust1	ENSG00000196482	3.15018	1.3816	0.799362	-0.500618	-0.664864	-0.664864	-0.664864	-0.613793	-0.556596	0.68927	0.471931	0.095784	-0.421167	-0.664864	-0.245664	-0.664864	-0.400778	-0.525196
clust1	ENSG00000170426	1.16471	3.0281	-0.676945	-0.676945	-0.676945	-0.305981	0.911817	1.19069	-0.676945	-0.335171	-0.346018	0.269578	-0.35254	0.190381	-0.676945	-0.676945	-0.676945	-0.676945
clust1	ENSG00000137747	0.818783	3.74022	0.34814	-0.476118	-0.219334	-0.227463	-0.476118	-0.476118	-0.476118	-0.476118	-0.0354774	-0.476118	-0.476118	-0.476118	-0.476118	-0.0356057	-0.240685	0.136477
clust1	ENSG00000147256	0.900808	3.81719	-0.16658	-0.369475	-0.369475	-0.369475	-0.369475	-0.0443435	-0.369475	-0.2026	-0.369475	-0.210626	-0.369475	-0.369475	-0.369475	-0.369475	-0.0296221	-0.369475
clust1	ENSG00000171509	1.82328	3.34669	-0.435676	0.362087	-0.435676	-0.435676	-0.435676	-0.435676	-0.435676	-0.182056	0.0527565	-0.435676	-0.435676	-0.435676	-0.174653	-0.435676	-0.435676	-0.435676
clust1	ENSG00000184221	2.22828	3.18055	-0.357458	-0.357458	-0.0469674	-0.357458	-0.357458	-0.357458	-0.357458	-0.357458	-0.357458	-0.357458	-0.357458	-0.357458	-0.357458	-0.357458	-0.357458	-0.357458
clust1	ENSG00000146192	1.52202	3.59399	-0.353917	-0.353917	-0.353917	-0.353917	-0.353917	-0.353917	-0.353917	-0.353917	-0.353917	-0.353917	-0.353917	-0.353917	-0.353917	-0.0889659	-0.0722053	-0.353917
clust1	ENSG00000213231	1.64171	3.51524	0.195282	-0.356815	-0.356815	-0.356815	-0.356815	-0.356815	-0.356815	-0.356815	-0.356815	-0.356815	-0.356815	-0.356815	-0.356815	-0.356815	-0.356815	-0.356815
clust1	ENSG00000165935	2.72688	1.24169	0.756545	-0.8947	-0.8947	-0.8947	-0.196897	-0.201249	-0.158671	1.41237	-0.211998	-0.554325	0.09612	-0.8947	-0.8947	-0.548678	-0.527049	0.638763
clust1	ENSG00000169203	1.99968	2.05303	1.04962	-0.0658056	-0.407625	-0.663811	-0.195254	-1.07218	0.0240015	0.670741	-0.407876	-0.494256	-0.922907	-0.861759	-1.15713	-0.646601	-0.182466	1.28061
clust1	ENSG00000182836	1.89207	1.69112	1.09797	-0.844983	-0.844983	-0.844983	-0.438511	-0.642258	0.21511	0.760112	-0.250991	-0.45413	-0.844983	-0.844983	-0.844983	-0.844983	0.402182	1.64221
clust1	ENSG00000101746	2.90561	1.90646	0.0644557	-1.26407	0.43089	-0.412397	-0.615063	-0.715425	-0.264848	0.563373	-0.638067	0.215338	-0.658347	-0.659431	-0.0979011	0.0737977	-0.381599	-0.452776
clust1	ENSG00000167880	2.84476	2.2504	0.633882	-0.331705	-0.169782	-0.467309	-0.480113	-0.223883	-0.335642	0.541766	-0.611057	-0.485163	-0.611057	-0.611057	-0.611057	-0.230092	-0.611057	-0.491841
clust1	ENSG00000283526	2.07821	2.81582	1.0286	-0.565451	0.133954	-0.389326	-0.248102	-0.405909	-0.565451	0.494979	-0.565451	-0.565451	-0.565451	-0.565451	-0.565451	-0.565451	-0.565451	-0.419168
clust1	ENSG00000143801	2.28479	2.54914	0.240495	-0.280832	0.123601	-0.770224	-1.05537	-0.430346	-0.376679	0.655581	-0.520041	-0.160842	-1.06541	-0.875065	-0.63406	0.0814848	0.244512	-0.0107369
clust1	ENSG00000149735	2.20195	2.66942	0.255816	-0.70795	-0.0916773	-0.70795	-0.70795	-0.70795	-0.70795	0.779735	0.306644	0.0617192	-0.70795	-0.224023	-0.41484	-0.70795	0.118857	-0.70795
clust1	ENSG00000102048	2.96833	2.01823	-0.0398658	-0.726129	-0.404628	-0.726129	-0.726129	-0.726129	-0.726129	-0.1598	-0.177622	-0.453077	-0.453952	0.239568	0.136485	-0.726129	0.409098	0.274013
clust1	ENSG00000010282	2.93705	2.25764	0.0281435	-0.0429675	-0.527286	-0.0311081	-0.527286	0.36237	-0.527286	-0.527286	-0.527286	-0.527286	-0.527286	-0.527286	-0.527286	-0.527286	-0.527286	0.289007
clust1	ENSG00000119125	2.33108	2.99377	0.172782	-0.491217	-0.491217	0.102025	-0.491217	-0.491217	-0.109063	-0.491217	-0.491217	-0.491217	-0.491217	-0.491217	-0.491217	-0.137424	-0.115151	-0.325853
clust1	ENSG00000184611	2.81972	2.59685	0.202834	-0.321025	-0.312311	-0.16562	-0.331	-0.471059	-0.471059	-0.471059	-0.471059	-0.471059	-0.336825	-0.348086	-0.181614	-0.471059	-0.325505	-0.471059
clust1	ENSG00000154620	1.79155	2.12246	0.85767	-1.01965	-1.01965	-1.01965	0.741977	-0.297907	-0.753222	0.362713	-0.308719	0.102723	-1.01965	-1.01965	-1.01965	0.322642	0.397994	0.778004
clust1	ENSG00000197943	1.91197	2.53075	0.816085	-0.770868	-0.677863	-0.768802	0.877208	0.0591096	0.0363968	-0.775644	-0.400519	-0.854448	-0.854448	-0.854448	-0.773335	-0.176991	0.487197	0.188657
clust1	ENSG00000122145	1.76166	2.72132	0.124125	0.0275915	-0.639472	-0.639472	-0.324277	-0.639472	-0.639472	-0.00974119	-0.639472	-0.639472	-0.639472	-0.639472	-0.639472	0.837507	-0.639472	1.25654
clust1	ENSG00000254221	1.91624	2.65433	0.763349	-0.585791	-0.417211	-0.216821	-0.319476	-0.753871	-0.483638	-0.742806	-1.20581	0.133715	-0.568118	-0.356225	-0.954394	0.351102	-0.0630726	0.848491
clust1	ENSG00000167194	2.21477	2.91686	0.557646	-0.422049	-0.65783	-0.65783	-0.65783	-0.0295493	-0.425318	-0.435227	-0.65783	-0.243004	-0.244291	-0.65783	-0.65783	-0.039096	-0.00247855	0.098721
clust1	ENSG00000198821	1.71891	2.94799	1.27111	-0.532741	-0.295417	-0.643034	-0.540095	-0.439126	-0.534304	-0.643034	-0.643034	-0.544067	-0.348912	-0.643034	-0.643034	0.0483289	0.193378	0.270118
clust1	ENSG00000215475	2.74488	0.800438	1.25219	-0.397581	-1.01093	-0.3826	0.844417	-0.629861	0.566956	-0.816378	-0.450679	-0.642148	-0.826384	-0.674104	-1.01093	0.977956	-0.0275585	-0.317671
clust1	ENSG00000188659	2.60003	1.27534	0.750303	-0.394226	-1.0663	-0.248639	0.526828	0.323365	0.438496	-0.794996	-0.823922	-0.838569	-1.16764	-0.718824	-0.542179	0.00307046	1.26195	-0.584082
clust1	ENSG00000154645	2.42913	1.57233	1.0818	-0.74584	-0.933927	-0.937259	0.939595	0.264103	0.62576	-0.499886	-0.0446484	-0.690308	-1.03966	-1.03966	-0.847529	0.174562	0.089789	-0.398336
clust1	ENSG00000164199	2.72692	1.14927	0.703121	-0.805502	-0.827819	-0.812011	0.691475	0.548772	0.719087	-0.829256	-0.874459	-0.825438	-0.805346	-0.814959	-0.835503	0.298013	0.139783	0.453845
clust1	ENSG00000204301	2.562	1.48015	1.18793	-0.912808	-0.403387	-0.664316	0.0928474	0.697344	-0.523354	-1.10745	-1.22655	-0.298542	-0.805885	-0.343941	-0.757351	0.346044	0.0960898	0.581183
clust1	ENSG00000125046	2.32606	1.87789	1.73855	-0.643022	-0.377481	-0.883349	-0.216732	0.423157	0.050257	-0.432254	-0.663988	-0.453956	-0.883349	-0.883349	-0.883349	-0.446799	0.0355578	0.316155
clust1	ENSG00000138669	2.11025	1.96874	1.77393	-0.713206	-0.639215	-0.647248	-0.292518	0.147498	0.305037	-0.500354	-0.784711	-0.571342	-0.897782	-0.897782	-0.897782	0.224424	-0.216695	0.528751
clust1	ENSG00000185917	2.4453	1.80646	1.63425	-0.71166	-0.67855	-1.10086	-0.297435	0.126243	-0.0998875	-0.496199	-0.551883	-0.753192	-0.530917	-0.675045	-0.818489	0.211853	0.0183279	0.471679
clust1	ENSG00000162419	2.06754	1.52928	1.512	-0.634702	-0.613281	-1.00947	0.527643	0.172741	0.297053	-0.526156	-1.01994	-0.760675	-1.11494	-0.97981	-0.99958	0.462163	0.53575	0.55438
clust1	ENSG00000145428	2.41484	1.83473	1.4301	-0.455497	-0.801832	-0.407127	0.16394	-0.0117427	-0.251162	-0.738277	-0.707394	-0.747641	-0.937784	-0.937784	-0.937784	0.451585	0.310635	0.328201
clust1	ENSG00000164904	2.20315	1.67877	1.64313	-0.592344	-0.643817	-0.664901	0.0450253	-0.0874687	0.1396	-0.710924	-0.856032	-0.659787	-0.997521	-0.999978	-0.985333	0.515436	0.566885	0.406114
clust1	ENSG00000131269	3.0546	1.06237	1.19486	-0.350881	-0.61972	-0.518361	-0.114455	0.102306	0.422135	-0.85062	-1.28894	-1.20592	-0.383072	-0.168393	-0.311512	0.0574586	0.0526307	-0.134487
clust1	ENSG00000198727	2.60427	1.22794	1.58064	-0.524138	-0.334339	-0.309829	0.726383	0.763373	0.351608	-1.14275	-0.63335	-0.806941	-0.803532	-0.520858	-0.651564	-0.440047	-0.469114	-0.617755
clust1	ENSG00000135423	2.87957	1.14941	1.3918	-0.741732	-0.445922	-0.455269	-0.223427	0.519077	-0.194612	-0.741732	0.499662	-0.741732	-0.741732	-0.741732	0.575857	-0.741732	-0.741732	-0.504015
clust1	ENSG00000169764	2.97949	1.03297	1.06481	-0.693262	-0.81385	-0.826421	0.094448	-0.0399311	0.0927207	0.169256	0.260973	0.226223	-0.0354284	0.0356737	-0.124614	-1.0838	-1.17657	-1.16268
clust1	ENSG00000002745	2.88792	0.567906	1.52317	-0.733344	-0.725794	-0.730145	1.31526	0.153109	-0.363683	-0.270213	-0.399661	-0.518434	-0.863811	-0.0527733	-0.863811	-0.627724	-0.371421	0.0734455
clust1	ENSG00000136688	2.70965	1.43959	1.26918	-0.618263	-0.618263	-0.618263	1.2955	-0.618263	-0.618263	-0.618263	-0.212685	-0.618263	-0.618263	-0.618263	-0.618263	0.17617	-0.618263	0.12349
clust1	ENSG00000164749	2.58595	1.8232	1.05969	-0.911613	-0.660597	0.190673	0.46666	-0.309106	0.735622	-0.565008	-0.505003	-0.260757	-0.977515	-0.771511	-0.830111	-0.778771	-0.442946	0.151151
clust1	ENSG00000127328	2.43974	1.78567	1.49927	-0.512605	-0.361049	-0.487222	0.202028	0.231487	0.548098	-0.252193	-0.0160127	-0.465155	-0.944531	-1.25735	-1.13407	-0.431353	-0.465108	-0.379654
clust1	ENSG00000132849	2.66723	1.50414	1.6204	-0.247765	-0.30553	-0.297932	0.356561	0.164185	0.280181	-0.231463	-0.400538	-0.254296	-0.949193	-1.12445	-0.9998	-0.64186	-0.660544	-0.479325
clust1	ENSG00000138964	2.21069	1.85577	1.6984	-0.727008	-0.727008	-0.727008	0.14929	0.426252	0.938522	-0.576881	-0.727008	-0.442242	-0.727008	-0.727008	-0.727008	-0.294195	-0.419244	-0.457308
clust1	ENSG00000140093	2.55565	1.69762	1.43738	-0.540386	-0.730476	-0.472384	0.256814	-0.109807	1.04227	-0.551087	-0.730476	-0.616002	-0.730476	-0.730476	-0.730476	-0.500169	-0.485881	-0.0616358
clust1	ENSG00000112782	2.68962	0.845431	1.96712	-0.798564	0.0694825	-0.798564	0.471018	0.213543	0.0104075	0.230415	-0.547411	-0.0618588	-0.798564	-0.798564	-0.798564	-0.297825	-0.798564	-0.798564
clust1	ENSG00000169432	3.27612	0.990124	1.11037	-0.766113	-0.764617	-0.765479	0.233302	0.14756	0.24404	-0.173789	-0.341833	-0.565975	-0.768822	-0.666963	-0.61992	-0.517484	-0.0688474	0.018326
clust1	ENSG00000165186	3.1368	1.4243	1.39224	-0.493419	-0.488202	-0.52797	-0.0747067	0.0241073	0.207362	-0.41521	-0.484964	-0.502628	-0.583821	-0.583821	-0.583821	-0.46878	-0.530935	-0.44653
clust1	ENSG00000198626	3.30154	1.41853	1.06033	-0.531088	-0.439842	-0.495168	0.029063	-0.0650478	-0.0963283	-0.284322	-0.351381	-0.251247	-0.676548	-0.705349	-0.705349	-0.324362	-0.521167	-0.362263
clust1	ENSG00000138670	2.94289	1.29439	1.45246	-0.250608	-0.475306	-0.692522	-0.0102067	-0.423777	0.458946	-0.474213	-0.145059	-0.159428	-0.913729	-0.978896	-0.583539	0.299939	-0.64695	-0.694391
clust1	ENSG00000196431	3.13345	1.46345	1.08417	-0.560324	-0.560324	-0.560324	0.386711	-0.346529	0.073934	-0.560324	-0.560324	-0.560324	-0.560324	-0.560324	-0.560324	0.368379	-0.560324	-0.560324
clust1	ENSG00000277149	2.99666	0.895189	1.68156	-0.11953	-0.225978	-0.825166	0.0607377	-0.291529	-0.655706	-0.14961	-1.14454	-0.28047	-0.578856	-0.353487	-0.673746	-0.0865909	-0.741993	0.493047
clust1	ENSG00000164266	3.36665	1.06893	1.12317	0.192669	-0.57994	-0.407507	0.145859	-0.57994	-0.413918	0.0175783	-0.57994	-0.57994	-0.57994	-0.57994	-0.416445	-0.57994	-0.57994	-0.037463
clust1	ENSG00000011258	3.10377	1.5448	1.38185	-0.295467	-0.0610564	-0.337635	-0.190781	-0.683495	-0.24707	-0.560108	-0.71498	-0.635522	-0.21487	-0.526523	-0.62289	-0.433218	-0.403037	-0.103763
clust1	ENSG00000067992	3.13211	1.34119	1.31584	-0.172174	-0.356784	-0.266726	-0.0123752	-0.337988	-0.07267	-0.69076	-1.04293	-1.01763	-0.183293	-0.639762	-0.306412	-0.320914	-0.140967	-0.227753
clust1	ENSG00000137869	2.89851	0.65705	1.96682	-0.36755	-0.347646	0.333021	-0.709281	-0.709281	-0.709281	-0.387039	-0.397398	-0.709281	-0.403622	-0.709281	-0.377615	0.524949	-0.709281	0.156205
clust1	ENSG00000143107	2.91347	1.73018	1.11389	-0.670914	-0.670914	-0.188768	-0.670914	-0.670914	-0.206741	-0.226609	-0.670914	-0.247786	-0.670914	-0.475868	-0.213826	0.768389	-0.670914	-0.269924
clust1	ENSG00000156574	2.81866	1.75755	1.28324	-0.0947516	0.0377448	-0.475217	-0.600913	-0.505293	-0.290436	-0.404677	-0.326271	-0.608572	-0.609189	-0.804182	-0.804182	0.68094	-0.697098	-0.357362
clust1	ENSG00000183032	2.89339	1.21793	1.81841	0.0523911	-0.545016	-0.249831	-0.775967	-0.91303	-0.8081	-0.554661	-0.291536	0.0223363	-0.702454	-0.328135	-0.288384	0.175798	-0.455149	-0.268001
clust1	ENSG00000171466	2.94571	1.25806	1.7201	-0.536801	-0.50874	-0.695825	-0.474259	-0.901033	-0.222127	-0.12546	-0.060212	-0.185412	-0.531691	-0.761024	-0.575895	0.37089	-0.4647	-0.251583
clust1	ENSG00000198780	3.06195	1.37895	1.45439	-0.587487	-0.341007	-0.543391	-0.454928	-0.744944	-0.664007	0.0383546	-0.0730328	-0.242544	-0.634263	-0.677306	-0.832944	0.0148262	-0.165407	0.0127934
clust1	ENSG00000100678	3.27014	0.976168	1.50516	-0.626661	-0.626661	-0.539605	-0.46863	-0.391953	-0.459776	-0.388037	-0.549122	-0.25062	-0.626661	-0.350838	-0.462356	0.340978	-0.220585	-0.130944
clust1	ENSG00000164654	3.11743	0.961604	1.62747	-0.292409	-0.11775	-0.567785	-0.833759	-0.665378	-0.690068	-0.478843	-0.381455	-0.236341	-0.743028	-0.373149	-0.580651	0.249609	-0.272553	0.277059
clust1	ENSG00000117148	3.15652	1.67339	0.909737	-0.543311	-0.543311	-0.543311	-0.543311	-0.543311	-0.543311	-0.352902	-0.543311	-0.186186	-0.543311	-0.543311	-0.347407	-0.180362	-0.347501	0.564513
clust1	ENSG00000179873	3.14499	1.93054	0.796073	-0.437727	-0.437727	-0.437727	-0.437727	-0.437727	-0.437727	-0.437727	-0.437727	-0.437727	-0.437727	-0.437727	-0.437727	-0.437727	-0.437727	0.256576
clust1	ENSG00000111305	3.27367	1.32901	1.13327	-0.48869	-0.48869	-0.48869	-0.48869	-0.48869	-0.48869	-0.48869	-0.48869	-0.294406	-0.48869	-0.48869	-0.48869	-0.0974083	0.520143	-0.48869
clust1	ENSG00000123600	3.02306	1.52476	1.4485	-0.730648	-0.852778	-0.812057	-0.491354	-0.61313	-0.416431	-0.300114	-0.334575	-0.409682	-0.223116	-0.399885	-0.368931	0.0186332	-0.0976315	0.0353804
clust1	ENSG00000184344	3.22085	1.32187	1.16825	-0.529402	-0.529402	-0.529402	-0.529402	-0.529402	-0.529402	-0.529402	-0.529402	-0.529402	-0.529402	-0.529402	-0.529402	0.294984	0.130865	0.216008
clust1	ENSG00000197961	3.05082	1.41985	1.30531	-0.69818	-0.704115	-0.726576	-0.276589	-0.408555	-0.377539	-0.596025	-0.598623	-0.665483	-0.413197	-0.496971	-0.551415	0.312551	0.281099	0.143633
clust1	ENSG00000152430	3.16959	1.81743	0.837645	-0.513048	-0.0902238	-0.10358	-0.513048	-0.513048	-0.513048	-0.513048	-0.513048	-0.513048	-0.513048	0.137973	-0.513048	-0.513048	-0.125309	-0.513048
clust1	ENSG00000286132	2.93406	1.85745	1.37564	-0.0959136	-0.226866	-0.330516	-0.705894	-0.579431	-0.744592	-0.289211	-0.502043	-0.202623	-0.278313	-0.288197	-0.524429	-0.344369	-0.567877	-0.486879
clust1	ENSG00000120669	3.04011	1.92835	1.1451	-0.110094	-0.489306	-0.489306	-0.489306	-0.489306	-0.489306	-0.489306	-0.314529	-0.489306	-0.489306	-0.177792	-0.303504	-0.31458	-0.489306	-0.489306
clust1	ENSG00000095627	3.0971	1.85117	1.18289	-0.444032	-0.251018	-0.257142	-0.444032	-0.444032	-0.444032	-0.444032	-0.444032	-0.444032	-0.444032	-0.294613	-0.444032	-0.444032	-0.444032	-0.444032
clust1	ENSG00000203909	2.9085	2.18706	1.0619	-0.432549	-0.101782	-0.432549	-0.432549	-0.432549	-0.432549	-0.432549	-0.432549	-0.432549	-0.432549	-0.432549	-0.432549	-0.432549	-0.432549	-0.432549
clust1	ENSG00000173930	3.02293	1.76244	1.36424	-0.276213	-0.623118	-0.287282	-0.307164	-0.572513	-0.156709	-0.240923	-0.316863	-0.364571	-0.513484	-0.495671	-0.247526	-0.645801	-0.636805	-0.464968
clust1	ENSG00000229453	2.95843	1.86278	1.37568	-0.47086	-0.47086	-0.47086	-0.0460449	-0.47086	-0.47086	-0.47086	-0.47086	-0.47086	-0.47086	-0.47086	-0.0296752	-0.47086	-0.47086	-0.47086
clust1	ENSG00000104112	2.93781	1.6928	1.62934	-0.613388	-0.529224	-0.532987	-0.508746	-0.353331	-0.594264	-0.264494	-0.261884	-0.405165	-0.268432	-0.510509	-0.435365	-0.211121	-0.435462	-0.335581
clust1	ENSG00000115339	2.77389	1.77069	1.81497	-0.49633	-0.484498	-0.52131	-0.308311	-0.497683	-0.416018	-0.236396	-0.339185	-0.203515	-0.357274	-0.521562	-0.393996	-0.487745	-0.516691	-0.57904
clust1	ENSG00000092345	2.87457	1.77237	1.69918	-0.440334	-0.440334	-0.440334	-0.440334	-0.440334	-0.440334	-0.440334	-0.410412	-0.440334	-0.440334	-0.440334	-0.440334	-0.440334	-0.346584	-0.305113
clust1	ENSG00000131264	2.893	1.6958	1.75313	-0.422795	-0.422795	-0.422795	-0.422795	-0.422795	-0.422795	-0.422795	-0.422795	-0.422795	-0.422795	-0.422795	-0.422795	-0.422795	-0.422795	-0.422795
clust1	ENSG00000189430	2.92978	1.65953	1.73167	-0.421399	-0.421399	-0.421399	-0.421399	-0.421399	-0.421399	-0.421399	-0.421399	-0.421399	-0.421399	-0.421399	-0.421399	-0.421399	-0.421399	-0.421399
clust1	ENSG00000182645	2.81717	1.984	1.55901	-0.424012	-0.424012	-0.424012	-0.424012	-0.424012	-0.424012	-0.424012	-0.424012	-0.424012	-0.424012	-0.424012	-0.424012	-0.424012	-0.424012	-0.424012
clust1	ENSG00000197721	2.96034	1.84807	1.47852	-0.419128	-0.419128	-0.419128	-0.419128	-0.419128	-0.419128	-0.419128	-0.419128	-0.419128	-0.419128	-0.419128	-0.419128	-0.419128	-0.419128	-0.419128
clust1	ENSG00000169836	3.13984	1.69125	1.29877	-0.427303	-0.455319	-0.455319	-0.455319	-0.429333	-0.455319	-0.301127	-0.165619	-0.430173	-0.455319	-0.455319	-0.455319	-0.429752	-0.374719	-0.3846
clust1	ENSG00000136267	3.01965	1.61539	1.54777	-0.497444	-0.491861	-0.349835	-0.4152	-0.504407	-0.593598	-0.194396	-0.206928	-0.0505997	-0.507566	-0.475701	-0.593598	-0.462375	-0.408247	-0.431054
clust1	ENSG00000163492	3.00039	1.70053	1.53154	-0.254523	-0.356581	-0.332875	-0.504993	-0.504993	-0.449323	-0.166155	-0.427832	-0.279899	-0.504993	-0.481821	-0.477534	-0.504993	-0.504993	-0.480958
clust1	ENSG00000115705	3.03306	1.62153	1.59015	-0.33488	-0.415979	-0.460701	-0.421257	-0.421509	-0.419039	-0.42085	-0.460701	-0.27365	-0.460701	-0.460701	-0.460701	-0.460701	-0.419705	-0.353667
clust1	ENSG00000133124	3.05982	1.62477	1.54766	-0.39247	-0.397695	-0.441063	-0.426514	-0.441867	-0.449511	-0.343217	-0.368204	-0.391056	-0.434792	-0.422634	-0.43354	-0.434497	-0.433548	-0.421638
clust1	ENSG00000130368	3.07588	1.44549	1.69506	-0.414429	-0.414429	-0.414429	-0.414429	-0.414429	-0.414429	-0.414429	-0.414429	-0.414429	-0.414429	-0.414429	-0.414429	-0.414429	-0.414429	-0.414429
clust1	ENSG00000169894	3.00516	1.54139	1.71094	-0.417868	-0.399446	-0.416755	-0.463197	-0.435089	-0.463197	-0.229519	-0.381057	-0.342931	-0.463197	-0.463197	-0.463197	-0.449334	-0.419219	-0.450287
clust1	ENSG00000122584	3.01384	1.75224	1.45246	-0.468966	-0.468966	-0.468966	-0.109777	-0.468966	-0.371898	-0.284711	-0.468966	-0.293522	-0.468966	-0.468966	-0.468966	-0.468966	-0.468966	-0.468966
clust1	ENSG00000133636	3.08386	1.57839	1.49933	-0.495022	-0.380887	-0.571684	-0.341235	-0.342549	-0.533127	-0.39998	-0.37497	-0.0583582	-0.536648	-0.393395	-0.363722	-0.436173	-0.395459	-0.538376
clust1	ENSG00000187513	2.90363	1.70605	1.60618	-0.524186	-0.524186	-0.524186	-0.524186	-0.320558	0.102166	-0.117216	-0.524186	-0.327067	-0.524186	-0.524186	-0.524186	-0.524186	-0.311319	-0.524186
clust1	ENSG00000125414	2.90838	1.6658	1.72	-0.481532	-0.481532	-0.481532	-0.342515	-0.109804	-0.250199	-0.481532	-0.453832	-0.481532	-0.481532	-0.481532	-0.481532	-0.399218	-0.481532	-0.404818
clust1	ENSG00000179796	2.98242	1.77245	1.45411	-0.478947	-0.475814	-0.505172	-0.311321	-0.172783	-0.032063	-0.482016	-0.483648	-0.436636	-0.5087	-0.532929	-0.532929	-0.41096	-0.403353	-0.441701
clust1	ENSG00000083067	3.06928	1.47442	1.62213	-0.546077	-0.56722	-0.459605	-0.146393	-0.223073	-0.221665	-0.507598	-0.547927	-0.548251	-0.38058	-0.379249	-0.465266	-0.395662	-0.404931	-0.37234
clust1	ENSG00000102290	3.01015	1.5471	1.66891	-0.519895	-0.535134	-0.519518	-0.263717	-0.317264	-0.30404	-0.313733	-0.385876	-0.440812	-0.535134	-0.535134	-0.535134	-0.399156	-0.404853	-0.216773
clust1	ENSG00000122679	3.0333	1.25426	1.75463	-0.49489	0.319504	-0.49489	-0.302631	-0.120397	-0.49489	-0.49489	-0.49489	-0.49489	-0.49489	-0.49489	-0.49489	-0.49489	-0.49489	-0.49489
clust1	ENSG00000046889	3.02191	1.54458	1.61464	-0.414018	-0.487473	-0.378189	-0.491777	-0.476123	-0.439969	-0.491446	-0.516194	-0.500752	-0.524172	-0.524172	-0.524172	-0.232128	-0.153121	-0.0274262
clust1	ENSG00000169760	3.23889	1.31391	1.42022	-0.260175	-0.380509	-0.326866	-0.552247	-0.495151	-0.579016	-0.37826	-0.37233	-0.322963	-0.583343	-0.599815	-0.625752	-0.132951	-0.186301	-0.177342
clust1	ENSG00000124233	3.37654	1.29571	1.25589	-0.395209	-0.395209	-0.395209	-0.395209	-0.395209	-0.395209	-0.395209	-0.395209	-0.395209	-0.395209	-0.395209	-0.395209	-0.395209	-0.395209	-0.395209
clust1	ENSG00000128610	3.41269	1.30727	1.15111	-0.4046	-0.4046	-0.4046	-0.353538	-0.4046	-0.4046	-0.4046	-0.4046	-0.4046	-0.4046	-0.4046	-0.4046	-0.257731	-0.4046	-0.4046
clust1	ENSG00000155886	3.25341	1.32054	1.47469	-0.416222	-0.431958	-0.432523	-0.402931	-0.449753	-0.416696	-0.220735	-0.419145	-0.360407	-0.449753	-0.449753	-0.449753	-0.449753	-0.306215	-0.393035
clust1	ENSG00000164129	3.24154	1.39915	1.41207	-0.417083	-0.414204	-0.466804	-0.466804	-0.466804	-0.466804	-0.466804	-0.466804	-0.466804	-0.33555	-0.385887	-0.278953	-0.421416	-0.190066	-0.341977
clust1	ENSG00000121380	3.34564	1.0501	1.47806	-0.482602	-0.28524	-0.482602	-0.13973	-0.19705	-0.238679	-0.482602	-0.368237	-0.482602	-0.482602	-0.482602	-0.482602	-0.482602	-0.301449	-0.482602
clust1	ENSG00000133101	3.13991	1.34735	1.60777	-0.361336	-0.552508	-0.4854	-0.316984	-0.209761	-0.246328	-0.43051	-0.552508	-0.552508	-0.552508	-0.552508	-0.194937	-0.492684	-0.308162	-0.286382
clust1	ENSG00000146360	3.15888	1.10292	1.82601	-0.405854	-0.405854	-0.405854	-0.405854	-0.405854	-0.405854	-0.405854	-0.405854	-0.405854	-0.405854	-0.405854	-0.405854	-0.405854	-0.405854	-0.405854
clust1	ENSG00000165621	2.33039	1.26149	2.46096	-0.580022	-0.580022	0.374769	-0.139526	-0.580022	-0.580022	-0.580022	-0.580022	-0.580022	-0.580022	-0.580022	-0.580022	-0.580022	-0.122335	0.214494
clust1	ENSG00000114378	2.60621	1.50984	2.10584	-0.925337	-0.656802	-0.340034	-0.220552	-0.180334	-0.171137	-0.211443	-0.526564	-0.300306	-0.539578	-0.880448	-0.332019	-0.0628188	-0.485864	-0.38865
clust1	ENSG00000174607	2.58062	1.96064	1.86606	-0.597242	-0.440546	-0.533808	-0.280119	-0.397675	-0.372618	-0.432182	-0.412915	-0.280618	-0.598921	-0.613201	-0.613201	-0.154105	-0.363634	-0.316532
clust1	ENSG00000173258	2.7292	1.79509	1.84717	-0.557338	-0.606089	-0.575506	-0.410161	-0.538187	-0.40462	-0.387752	-0.491351	-0.460621	-0.385076	-0.457709	-0.400093	-0.21774	-0.273599	-0.205611
clust1	ENSG00000136014	2.6198	1.90061	1.92119	-0.536806	-0.517629	-0.446489	-0.421609	-0.456791	-0.40043	-0.406803	-0.417875	-0.433149	-0.323961	-0.413696	-0.26605	-0.424505	-0.49754	-0.478277
clust1	ENSG00000101327	2.6612	2.04371	1.72106	-0.439596	-0.439596	-0.439596	-0.439596	-0.439596	-0.439596	-0.439596	-0.439596	-0.439596	-0.439596	-0.439596	-0.439596	-0.439596	-0.439596	-0.271628
clust1	ENSG00000151577	2.6484	1.99904	1.79518	-0.429508	-0.429508	-0.429508	-0.429508	-0.429508	-0.429508	-0.429508	-0.429508	-0.429508	-0.429508	-0.429508	-0.429508	-0.429508	-0.429508	-0.429508
clust1	ENSG00000124491	2.52152	2.03808	1.90601	-0.486085	-0.486085	-0.486085	-0.338197	-0.387479	-0.33002	-0.486085	-0.486085	-0.486085	-0.438217	-0.486085	-0.486085	-0.341468	-0.434182	-0.307367
clust1	ENSG00000240563	2.55989	1.94328	1.96727	-0.428167	-0.44508	-0.44508	-0.350242	-0.437169	-0.396615	-0.44508	-0.429627	-0.44508	-0.44508	-0.44508	-0.44508	-0.437297	-0.44508	-0.430681
clust1	ENSG00000274588	2.61523	1.91493	1.92477	-0.449511	-0.449511	-0.449511	-0.39831	-0.398632	-0.35383	-0.439	-0.429244	-0.409957	-0.449511	-0.449511	-0.449511	-0.439341	-0.449511	-0.440039
clust1	ENSG00000163530	2.62537	1.722	1.98755	-0.480752	-0.476905	-0.548147	-0.155394	-0.0176174	-0.0856508	-0.548147	-0.486536	-0.548147	-0.548147	-0.548147	-0.548147	-0.548147	-0.246899	-0.548147
clust1	ENSG00000237136	2.66322	1.67766	2.04563	-0.485619	-0.337709	-0.485619	-0.485619	-0.35558	-0.485619	-0.485619	-0.485619	-0.485619	-0.485619	-0.485619	-0.485619	-0.485619	-0.0989348	-0.252479
clust1	ENSG00000143297	2.69932	1.72398	1.99774	-0.43114	-0.43114	-0.43114	-0.43114	-0.43114	-0.43114	-0.43114	-0.43114	-0.43114	-0.43114	-0.43114	-0.43114	-0.43114	-0.43114	-0.385081
clust1	ENSG00000232535	2.80152	1.43286	2.10266	-0.422469	-0.422469	-0.422469	-0.422469	-0.422469	-0.422469	-0.422469	-0.422469	-0.422469	-0.422469	-0.422469	-0.422469	-0.422469	-0.422469	-0.422469
clust1	ENSG00000133317	2.49955	1.5404	2.35224	-0.461521	-0.461521	-0.461521	-0.461521	-0.461521	-0.461521	-0.461521	-0.182017	-0.461521	-0.461521	-0.210387	-0.461521	-0.461521	-0.461521	-0.461521
clust1	ENSG00000164458	2.48399	1.1757	2.61245	-0.418142	-0.418142	-0.418142	-0.418142	-0.418142	-0.418142	-0.418142	-0.418142	-0.418142	-0.418142	-0.418142	-0.418142	-0.418142	-0.418142	-0.418142
clust1	ENSG00000163508	2.42507	1.25466	2.55479	-0.460708	-0.460708	-0.460708	-0.460708	-0.460708	-0.460708	-0.460708	-0.460708	-0.460708	-0.460708	-0.460708	0.215388	-0.460708	-0.460708	-0.460708
clust1	ENSG00000196460	2.62956	1.39705	2.24832	-0.285368	-0.363267	-0.181084	-0.58137	-0.400924	-0.674969	-0.396426	-0.405177	-0.409603	-0.674969	-0.432225	-0.117308	-0.493575	-0.674969	-0.1837
clust1	ENSG00000146839	2.86259	1.29844	2.03649	-0.495578	-0.495578	-0.0360688	-0.495578	-0.495578	-0.495578	-0.495578	-0.0863098	-0.495578	-0.495578	-0.128203	-0.495578	-0.495578	-0.495578	-0.495578
clust1	ENSG00000187730	2.92428	1.01229	2.1782	-0.0809437	-0.263254	-0.370817	-0.287828	-0.472992	-0.472992	-0.472992	-0.472992	-0.472992	-0.472992	-0.472992	-0.472992	-0.381993	-0.472992	-0.472992
clust1	ENSG00000205856	2.89947	1.02866	2.20282	-0.444829	-0.444829	-0.444829	-0.444829	-0.444829	-0.444829	-0.444829	-0.444829	-0.016643	-0.444829	-0.444829	-0.444829	-0.33153	-0.444829	-0.444829
clust1	ENSG00000177125	2.32321	1.96004	1.8736	-0.239242	-0.0531912	-0.535323	-0.307176	-1.07268	-0.640923	-0.125229	-0.600448	-1.01889	-0.152957	-0.725252	-0.415334	0.060484	-0.329018	-0.00167359
clust1	ENSG00000138336	2.3001	1.88128	2.02501	-0.18689	-0.0242619	-0.0697085	-0.903593	-0.968886	-0.719217	-0.348493	-0.534272	-0.507317	-0.541975	-0.672562	-0.575688	-0.00301339	-0.118195	-0.0323212
clust1	ENSG00000204519	2.4519	1.74192	2.02692	-0.396082	-0.190509	-0.22741	-0.909705	-0.895047	-0.649771	-0.326242	-0.491499	-0.361207	-0.63586	-0.692372	-0.418212	-0.0986124	0.0495112	0.02228
clust1	ENSG00000141384	2.6849	1.76462	1.60284	-0.182455	0.0815093	0.109191	-0.852639	-0.959662	-0.643882	-0.557605	-0.680897	-0.577673	-0.642531	-0.56518	-0.350611	-0.0694177	-0.160319	-0.000183376
clust1	ENSG00000196323	2.73191	1.69909	1.7641	-0.207084	0.0496208	0.00695539	-0.774511	-0.881773	-0.527168	-0.464956	-0.477179	-0.563805	-0.480079	-0.486173	-0.649586	-0.217164	-0.299316	-0.222891
clust1	ENSG00000003987	2.48761	1.75854	1.96859	-0.563749	-0.425864	-0.745466	-0.730681	-0.350931	-0.3107	-0.484401	-0.111149	-0.786526	-0.659206	0.00493824	-0.785283	-0.320072	-0.058568	0.112913
clust1	ENSG00000124532	2.48016	1.86064	1.85982	-0.722304	-0.732116	-0.499935	-0.574819	-0.548741	-0.494455	-0.152473	-0.408761	-0.297135	-0.498693	-0.686966	-0.83969	0.171524	0.101112	-0.0171623
clust1	ENSG00000113356	2.93279	1.57664	1.51772	-0.709803	-0.45775	-0.430487	-0.511748	-0.539851	-0.405066	-0.397855	-0.41546	-0.401353	-0.656526	-0.659895	-0.773364	0.112205	0.117737	0.102073
clust1	ENSG00000128833	2.75623	1.63947	1.83751	-0.606926	-0.537652	-0.638072	-0.320655	-0.242641	-0.307053	-0.325675	-0.394212	-0.504312	-0.731204	-0.591287	-0.762288	0.00134777	-0.132111	-0.140472
clust1	ENSG00000106278	2.673	1.8165	1.78682	-0.526682	-0.482189	-0.519661	-0.371464	-0.431015	-0.34873	-0.549074	-0.514385	-0.542369	-0.651414	-0.651414	-0.651414	-0.0213013	-0.0497132	0.0345101
clust1	ENSG00000114805	2.75776	1.71174	1.78151	-0.559144	-0.546311	-0.559144	-0.471158	-0.461164	-0.547189	-0.502916	-0.462671	-0.526757	-0.51627	-0.549208	-0.559144	0.075215	-0.0371967	-0.0279532
clust1	ENSG00000124657	2.84656	1.79122	1.48802	-0.404375	-0.523302	-0.665944	-0.665944	-0.540465	-0.17908	-0.30525	-0.425994	-0.665944	-0.544806	-0.665944	-0.53479	-0.211686	0.0169576	0.190764
clust1	ENSG00000186479	2.60939	1.82431	1.84861	-0.656309	-0.656309	-0.447635	-0.343002	-0.34495	-0.0162723	-0.159321	-0.656309	-0.533467	-0.656309	-0.656309	-0.589479	-0.290781	-0.331031	0.0551764
clust1	ENSG00000180336	2.5066	1.89513	1.85383	-0.681821	-0.512579	-0.474524	-0.426207	-0.81771	-0.687451	-0.470133	-0.296594	-0.285772	-0.723955	-0.480833	-0.300207	-0.226936	-0.177407	0.306564
clust1	ENSG00000114126	2.72758	1.76301	1.80266	-0.264311	-0.350217	-0.667315	-0.69044	-0.82777	-0.650732	-0.358446	-0.350027	-0.382986	-0.250651	-0.514367	-0.228428	-0.313314	-0.170869	-0.273374
clust1	ENSG00000136504	2.3464	1.99865	2.02148	-0.443214	-0.458156	-0.413067	-0.519371	-0.78067	-0.738642	-0.519867	-0.520387	-0.482367	-0.436003	-0.532994	-0.374288	-0.120491	-0.0796919	0.0526758
clust1	ENSG00000103723	2.34726	2.04614	2.06907	-0.560364	-0.445769	-0.454923	-0.637072	-0.621646	-0.5797	-0.447072	-0.493168	-0.404181	-0.309708	-0.381299	-0.311729	-0.208965	-0.33376	-0.273116
clust1	ENSG00000153046	2.24916	2.10077	2.09427	-0.307552	-0.59891	-0.457442	-0.588907	-0.736762	-0.568474	-0.467665	-0.284507	-0.420228	-0.380138	-0.555807	-0.444502	-0.257808	-0.223472	-0.152019
clust1	ENSG00000196267	2.84599	1.65661	1.63851	0.0568765	-0.507273	-0.432384	-0.39649	-0.873413	-0.11338	-0.382373	-0.691847	-0.350521	-0.770464	-0.497818	-0.588729	-0.351935	-0.0886924	-0.152676
clust1	ENSG00000048540	2.73817	1.74351	1.7449	-0.404119	-0.334528	-0.219491	-0.459556	-0.463002	-0.328827	-0.588032	-0.568776	-0.592524	-0.777856	-0.659978	-0.682511	-0.181879	0.0297337	0.00476336
clust1	ENSG00000124486	2.68816	1.77992	1.71009	-0.329508	-0.22261	-0.120716	-0.369265	-0.72294	-0.366112	-0.655292	-0.71237	-0.934482	-0.396719	-0.72367	-0.432476	-0.150766	-0.103362	0.0621182
clust1	ENSG00000112796	2.67891	1.93635	1.71964	-0.447516	-0.575612	-0.5779	-0.400988	-0.344883	-0.614312	-0.227431	-0.0353186	-0.219975	-0.526628	-0.620085	-0.614842	-0.43521	-0.453307	-0.240889
clust1	ENSG00000146530	2.49953	2.07837	1.78705	-0.472812	-0.556033	-0.454239	-0.508955	-0.540301	-0.53931	0.0495055	-0.0121383	-0.248296	-0.481442	-0.542134	-0.556033	-0.435869	-0.539577	-0.527319
clust1	ENSG00000163032	2.59685	1.86591	1.78693	-0.339735	-0.334314	-0.230708	-0.60222	-0.582619	-0.463935	-0.014959	-9.02515e-05	-0.0937987	-0.848452	-0.713037	-0.803328	-0.37602	-0.395303	-0.451174
clust1	ENSG00000166405	2.42851	2.05369	1.72699	-0.395292	-0.185103	-0.318586	-0.67397	-0.661198	-0.577997	0.0775893	0.121296	-0.0495927	-0.805202	-0.770096	-0.80157	-0.506537	-0.306626	-0.356312
clust1	ENSG00000133454	2.53092	1.9641	1.80113	-0.274725	-0.569419	-0.57283	-0.394322	-0.676878	-0.182838	-0.0189915	0.0490946	-0.138229	-0.676878	-0.593697	-0.676878	-0.584236	-0.480511	-0.504815
clust1	ENSG00000197822	2.25726	1.9984	2.07693	-0.563166	-0.52767	-0.511636	-0.443619	-0.465583	-0.476799	0.122524	0.0728172	-0.048211	-0.692861	-0.618265	-0.638336	-0.601859	-0.432052	-0.507876
clust1	ENSG00000198028	2.44112	1.96659	1.86066	-0.614974	-0.614974	-0.614974	-0.449786	-0.590148	-0.537455	0.129838	0.217084	-0.0887806	-0.614974	-0.614974	-0.614974	-0.453277	-0.421042	-0.384965
clust1	ENSG00000114757	2.4794	2.15837	1.78312	-0.318881	-0.364443	-0.496756	-0.4787	-0.70489	-0.602294	-0.218253	-0.594426	-0.469513	-0.491566	-0.271632	-0.266821	-0.400627	-0.354518	-0.387575
clust1	ENSG00000122254	2.5042	2.17173	1.77932	-0.475969	-0.397688	-0.475969	-0.273208	-0.407293	-0.475969	-0.475969	-0.408375	-0.280808	-0.475969	-0.475969	-0.475969	-0.475969	-0.404157	-0.475969
clust1	ENSG00000162624	2.38603	2.32145	1.7624	-0.441339	-0.441339	-0.441339	-0.441339	-0.29113	-0.441339	-0.441339	-0.441339	-0.441339	-0.441339	-0.441339	-0.441339	-0.441339	-0.441339	-0.441339
clust1	ENSG00000273274	2.47987	2.1891	1.73531	-0.304964	-0.253624	-0.400972	-0.62463	-0.547151	-0.466725	-0.198374	-0.260586	-0.302552	-0.592112	-0.652771	-0.591799	-0.4507	-0.432079	-0.325237
clust1	ENSG00000184307	2.44354	2.09181	1.93763	-0.256263	-0.406228	-0.411297	-0.411047	-0.483247	-0.462408	-0.299435	-0.346965	-0.376846	-0.528953	-0.545823	-0.494415	-0.528086	-0.50981	-0.412154
clust1	ENSG00000149573	2.45185	2.02702	1.97107	-0.363154	-0.538693	-0.358866	-0.538693	-0.456727	-0.538693	-0.0540356	-0.378351	-0.381018	-0.381523	-0.466261	-0.538693	-0.538693	-0.452965	-0.463574
clust1	ENSG00000170627	2.54341	2.08351	1.8127	-0.467132	-0.467132	-0.467132	-0.467132	-0.467132	-0.467132	-0.176478	-0.467132	-0.19043	-0.467132	-0.467132	-0.467132	-0.467132	-0.467132	-0.467132
clust1	ENSG00000165929	2.61319	1.87784	1.90755	-0.349308	-0.2555	-0.200687	-0.441615	-0.442496	-0.233878	-0.361785	-0.422438	-0.271614	-0.550479	-0.586758	-0.547428	-0.574307	-0.573521	-0.586758
clust1	ENSG00000008311	2.68469	1.89725	1.82659	-0.262153	-0.351208	-0.295492	-0.474697	-0.604935	-0.37748	-0.346848	-0.419422	-0.385205	-0.474291	-0.526798	-0.463556	-0.457584	-0.520366	-0.448499
clust1	ENSG00000180264	2.63561	1.76185	2.02429	-0.30519	-0.486306	-0.300756	-0.401299	-0.486306	-0.486306	-0.231359	-0.40318	-0.486306	-0.486306	-0.486306	-0.486306	-0.403205	-0.486306	-0.486306
clust1	ENSG00000119139	2.67292	1.92593	1.80462	-0.419887	-0.379042	-0.442116	-0.510023	-0.287563	-0.422941	-0.306631	-0.293007	-0.346112	-0.613504	-0.59298	-0.504946	-0.463399	-0.505011	-0.316313
clust1	ENSG00000164344	2.79428	1.76211	1.80805	-0.41773	-0.409664	-0.414307	-0.47124	-0.42786	-0.250354	-0.262458	-0.367808	-0.312703	-0.496877	-0.502473	-0.515319	-0.541402	-0.515343	-0.458902
clust1	ENSG00000189127	2.7072	1.88434	1.82523	-0.453497	-0.398126	-0.452855	-0.407558	-0.40801	-0.284626	-0.383306	-0.409126	-0.365729	-0.479632	-0.479632	-0.479632	-0.455777	-0.479632	-0.479632
clust1	ENSG00000126010	2.68661	1.9622	1.67364	-0.405954	-0.394807	-0.000957944	-0.614475	-0.614475	-0.614475	-0.247297	-0.37327	-0.353236	-0.585745	-0.488208	-0.583323	-0.152086	-0.38535	-0.50878
clust1	ENSG00000180287	2.69253	1.70678	1.90847	-0.300555	-0.253418	0.000135035	-0.555788	-0.609647	-0.551273	-0.218304	-0.279794	-0.213959	-0.636572	-0.636572	-0.636572	-0.454508	-0.470305	-0.490651
clust1	ENSG00000221970	2.44509	1.99594	1.8258	0.00987071	0.0467478	-0.531434	0.065695	-0.542419	-0.535818	-0.126719	-0.647451	-0.647451	-0.44605	-0.647451	-0.322003	-0.647451	-0.647451	-0.647451
clust1	ENSG00000159495	2.58204	2.36424	1.19328	-0.471279	-0.471279	-0.471279	-0.471279	-0.471279	-0.471279	0.458354	-0.471279	-0.471279	-0.471279	-0.471279	-0.471279	-0.471279	-0.471279	-0.471279
clust1	ENSG00000164112	2.64928	1.94108	1.67757	-0.504386	-0.504386	-0.504386	-0.504386	-0.504386	-0.504386	0.30298	-0.504386	-0.504386	-0.504386	-0.504386	-0.504386	-0.504386	-0.504386	-0.0139026
clust1	ENSG00000137261	2.24051	2.49306	1.55531	-0.577514	-0.574412	-0.630809	-0.48281	-0.630809	-0.578268	-0.530717	-0.252418	-0.488472	-0.304892	-0.500763	-0.579083	0.016123	-0.229318	0.0552764
clust1	ENSG00000118513	2.74141	2.08173	1.24737	-0.610145	-0.68409	-0.534357	-0.581069	-0.615475	-0.611184	-0.479276	-0.453791	-0.488919	-0.458242	-0.336452	-0.47346	0.3778	-0.120678	-0.00117872
clust1	ENSG00000185149	2.47673	2.05604	1.72528	-0.60154	-0.60154	-0.60154	-0.60154	-0.28633	-0.376526	-0.281144	-0.60154	-0.60154	-0.60154	-0.60154	-0.60154	0.287656	-0.0615167	-0.126322
clust1	ENSG00000197705	2.46387	2.02334	1.76299	-0.561103	-0.561103	-0.561103	-0.561103	-0.326919	-0.561103	-0.561103	-0.561103	-0.561103	-0.561103	-0.561103	-0.316248	0.496294	-0.198422	-0.293877
clust1	ENSG00000147117	2.76603	2.05589	1.28552	-0.210691	-0.556177	-0.659306	-0.579606	-0.668664	-0.663039	-0.667164	-0.498851	-0.586384	-0.343053	-0.304357	-0.0636116	0.117641	0.0146127	-0.438785
clust1	ENSG00000185610	2.37668	2.65019	1.09038	-0.205695	-0.496699	-0.496699	-0.496699	-0.496699	-0.496699	-0.496699	-0.496699	-0.235365	-0.496699	-0.496699	-0.496699	0.284208	-0.496699	-0.496699
clust1	ENSG00000176884	2.24201	2.60347	1.39568	-0.63577	-0.574327	-0.22723	-0.527716	0.189802	-0.465125	-0.581025	-0.271167	-0.177265	-0.480866	-0.588211	-0.412433	-0.477774	-0.523475	-0.488575
clust1	ENSG00000205502	2.12373	2.97126	0.972987	-0.456113	-0.456113	-0.456113	-0.456113	-0.0525945	-0.456113	-0.456113	-0.456113	-0.456113	-0.456113	-0.456113	-0.456113	-0.456113	-0.456113	-0.0859224
clust1	ENSG00000187094	2.54124	2.55548	1.17104	-0.432635	-0.432635	-0.432635	-0.432635	-0.319942	-0.432635	-0.432635	-0.432635	-0.323555	-0.432635	-0.432635	-0.432635	-0.432635	-0.432635	-0.432635
clust1	ENSG00000204610	2.74763	2.52877	0.780904	-0.40382	-0.40382	-0.40382	-0.40382	-0.40382	-0.40382	-0.40382	-0.40382	-0.40382	-0.40382	-0.40382	-0.40382	-0.40382	-0.40382	-0.40382
clust1	ENSG00000139287	2.78407	2.19769	1.30359	-0.456879	-0.456879	-0.456879	-0.456879	-0.272502	-0.26089	-0.269406	-0.456879	-0.456879	-0.456879	-0.456879	-0.456879	-0.456879	-0.456879	-0.456879
clust1	ENSG00000166979	2.71561	2.3016	1.22782	-0.559389	-0.316418	-0.479287	-0.353361	-0.494099	-0.485196	-0.213017	-0.427475	-0.636872	-0.299088	-0.326745	-0.561663	-0.496385	-0.342477	-0.253563
clust1	ENSG00000084453	2.7007	2.24669	1.24431	-0.152519	-0.315843	-0.16566	-0.729898	-0.441403	-0.532936	-0.283509	-0.24874	-0.23273	-0.703949	-0.612152	-0.618175	-0.573082	-0.32308	-0.258025
clust1	ENSG00000167851	2.51326	2.39506	1.33501	-0.131123	-0.208066	0.152512	-0.518289	-0.518289	-0.518289	-0.518289	-0.518289	-0.518289	-0.518289	-0.355471	-0.518289	-0.518289	-0.518289	-0.518289
clust1	ENSG00000144741	2.178	1.83995	2.04711	-0.471718	-0.487143	-0.395664	0.0924273	0.314049	0.279685	-0.574101	-0.479083	-0.861612	-0.470757	-0.572937	-1.14957	-0.13503	-0.472017	-0.681586
clust1	ENSG00000174669	2.29633	1.78139	2.12317	-0.276737	-0.535023	-0.337463	-0.357509	0.262443	0.0423468	-0.493989	-0.418886	-0.512628	-0.892754	-0.786338	-0.881934	-0.119316	-0.244024	-0.649071
clust1	ENSG00000132932	2.30462	1.7164	2.14274	-0.590856	-0.488195	-0.627918	0.261798	-0.0332279	0.154811	-0.645377	-0.527042	-0.341175	-0.841498	-0.769742	-0.78676	-0.315082	-0.477452	-0.136043
clust1	ENSG00000135063	2.33412	2.14799	1.87179	-0.370824	-0.360664	-0.393323	-0.180456	-0.231362	0.0811731	-0.30076	-0.325227	-0.305787	-0.67612	-0.717449	-0.672648	-0.642488	-0.655158	-0.602807
clust1	ENSG00000165588	2.32312	1.9759	2.1589	-0.497435	-0.497435	-0.497435	-0.160196	-0.188345	-0.15778	-0.497435	-0.479813	-0.497435	-0.497435	-0.497435	-0.497435	-0.497435	-0.497435	-0.497435
clust1	ENSG00000226887	2.15492	2.2279	2.07609	-0.352187	-0.554458	-0.406939	-0.251129	-0.329114	-0.0787164	-0.45129	-0.53075	-0.516955	-0.578697	-0.610732	-0.610732	-0.441788	-0.345148	-0.400274
clust1	ENSG00000147485	1.86022	2.3478	1.96612	-0.364479	-0.839057	-0.768878	-0.399713	0.0676497	0.242321	-0.520393	-0.350635	0.0928699	-0.245259	-0.914959	-0.64133	-0.471508	-0.44448	-0.616293
clust1	ENSG00000112367	1.94112	2.28863	2.03721	-0.87692	-0.849729	-0.911713	-0.0665789	-0.0819093	-0.120264	-0.137239	-0.353969	-0.404324	-0.387843	-0.778771	-0.410146	-0.280907	-0.287071	-0.319569
clust1	ENSG00000133958	2.21578	2.14992	1.9272	-0.556889	-0.88059	-0.615827	0.0226282	-0.341028	-0.275337	0.0329715	0.0753732	-0.363815	-0.548742	-0.650157	-0.686004	-0.475591	-0.572223	-0.457668
clust1	ENSG00000110944	1.6511	2.145	2.1766	-1.1472	-0.847828	-0.508008	0.312816	0.380152	-0.771624	-0.375409	-0.506574	-0.521863	0.0167762	-0.333906	-0.782777	-0.609239	-0.151136	-0.126875
clust1	ENSG00000181856	2.00971	2.1747	1.68242	-0.881725	-0.807445	-0.809791	0.565021	0.603966	-0.116144	-0.68602	-0.692197	-0.756569	-0.517733	-0.337828	-0.680406	-0.451844	-0.185512	-0.1126
clust1	ENSG00000105427	1.7981	2.43373	1.78905	-0.281331	-0.982148	-0.155222	-0.115215	0.301132	-0.669304	-0.549955	-0.0379468	-0.695167	-0.832867	-0.600752	-0.982148	-0.332276	0.182803	-0.270484
clust1	ENSG00000170549	1.81129	2.51384	1.90452	-0.533457	-0.533457	-0.533457	0.579003	-0.362368	-0.533457	-0.533457	-0.533457	-0.533457	-0.533457	-0.533457	-0.533457	-0.533457	-0.354582	-0.223672
clust1	ENSG00000183476	2.14737	2.42926	1.56443	-0.201877	-0.906038	-0.185337	0.208554	-0.0964593	-0.725545	-0.906038	-0.41636	-0.581094	-0.582122	-0.755803	-0.0609195	-0.260918	-0.221993	-0.449116
clust1	ENSG00000077157	2.65932	1.5654	1.4874	-0.888959	-1.08716	-0.98274	-0.157028	-1.04229	-0.162192	0.259405	0.260296	-0.0619958	-0.212901	-0.353682	-0.651685	-0.0374133	-0.669889	0.0761293
clust1	ENSG00000197279	2.75783	1.65307	1.03249	-1.00902	-0.985005	-0.86161	0.0424199	-0.792146	-0.401992	-0.0858342	-0.0750368	0.083794	-0.591147	-0.191048	-0.890202	0.511345	-0.644206	0.446299
clust1	ENSG00000081985	2.79232	1.54677	1.71192	-0.337504	-0.70164	-0.663473	-0.372491	-0.724309	-0.465076	0.0346862	0.433875	-0.143145	-0.808021	-0.534237	-0.352939	-0.383542	-0.511668	-0.521524
clust1	ENSG00000158528	3.03916	1.52919	1.28909	-0.557465	-1.14005	-0.661919	-0.600711	-0.69517	-0.414485	0.0604596	-0.0723746	0.108055	-0.573576	-0.322879	-0.271276	-0.255371	-0.236496	-0.224179
clust1	ENSG00000108395	2.96617	1.17153	1.39373	-1.01026	-0.64478	-0.683475	-0.302857	-0.382429	0.0554134	0.155851	0.266667	0.149774	-1.00029	-0.828419	-0.945083	-0.101243	-0.142874	-0.117419
clust1	ENSG00000174600	2.91293	1.12154	1.83836	-0.710417	-0.710417	-0.710417	0.0891015	-0.274117	-0.130874	-0.229233	0.27085	-0.361142	-0.710417	-0.710417	-0.710417	-0.135554	-0.666774	-0.172584
clust1	ENSG00000276180	2.20607	1.90693	1.68959	-0.402046	-0.343602	-1.4851	-0.471005	-0.646649	-0.416507	-0.0202139	-1.0446	0.382491	-0.51235	-0.448053	0.265739	0.185987	-0.124472	-0.72221
clust1	ENSG00000105778	2.02137	1.8295	2.05683	-0.96847	-1.17467	-1.0173	-0.262403	-0.830628	-0.536316	0.00680105	-0.192284	-0.424565	-0.269893	-0.673954	0.0318153	0.346496	-0.158595	0.216263
clust1	ENSG00000151498	2.11253	2.21039	1.95161	-0.651279	-0.994561	-0.7492	-0.510804	-0.762262	-0.577856	-0.181243	-0.0236921	-0.0995908	-0.153293	-0.474143	-0.00625151	-0.356319	-0.412187	-0.321847
clust1	ENSG00000168939	2.41759	2.00025	1.89993	-0.835961	-0.778057	-0.586843	-0.127037	-0.784407	-0.504095	-0.100754	-0.250746	-0.454681	-0.428761	-0.392685	-0.330403	-0.0462822	-0.486991	-0.210066
clust1	ENSG00000104689	1.96188	1.75997	1.89822	-1.2398	-1.19589	-1.2211	-0.811259	-0.424121	-0.415291	0.258257	0.0126107	0.45053	-0.509842	-0.511119	-0.0457843	0.361671	-0.122818	-0.206118
clust1	ENSG00000153767	2.49754	1.71065	1.74542	-0.742578	-0.706916	-0.986249	-0.662887	-0.871274	-0.529168	0.110927	0.00442474	-0.0261455	-0.484987	-0.677445	-0.708961	0.145168	0.231932	-0.0494516
clust1	ENSG00000198131	2.44166	1.94434	1.62285	-0.920017	-0.944744	-1.05667	-0.491456	-0.843635	-0.0881768	-0.210432	-0.152451	-0.0752597	-0.251621	-0.595417	-0.54233	-0.0266519	0.138196	0.0518108
clust1	ENSG00000112685	2.82359	1.74469	1.36155	-0.837232	-1.13614	-1.14124	-0.0117165	-0.301909	-0.247817	-0.152882	-0.180458	-0.220884	-0.334499	-0.500811	-0.338234	-0.138262	-0.251078	-0.136673
clust1	ENSG00000215114	2.79982	1.56193	1.52257	-0.892811	-1.12347	-1.11804	-0.0198625	-0.632854	-0.0157695	-0.134764	-0.17002	-0.232398	-0.419156	-0.443934	-0.301455	-0.0182049	-0.357252	-0.00432012
clust1	ENSG00000077684	2.35835	1.7202	1.75068	-1.14446	-1.17848	-1.07038	-0.21517	-0.127992	-0.189016	-0.219996	-0.353589	-0.154463	-0.606728	-0.640378	-0.583628	0.30919	0.172103	0.173757
clust1	ENSG00000247626	2.33192	1.79061	1.78769	-0.873209	-1.06649	-1.04051	-0.431427	-0.389502	-0.429547	-0.370442	-0.262236	-0.289342	-0.563991	-0.66716	-0.518945	0.285097	0.327626	0.379863
clust1	ENSG00000178538	2.16367	0.670136	0.63905	0.446629	0.56061	0.539547	0.762454	0.99047	0.762611	-1.17798	-1.20436	-1.16852	-1.32754	-1.08276	-1.13054	-0.104868	-0.286626	-0.0519875
clust1	ENSG00000243927	1.7179	0.896383	0.612265	0.58472	0.754388	0.388881	-0.00208058	0.758729	-0.272423	-1.05899	-1.12242	-0.934994	-1.71055	-0.922648	-1.67453	0.614016	0.731336	0.64002
clust1	ENSG00000007174	0.775978	-0.206382	0.574804	1.39406	-0.439995	0.0163015	0.832924	1.25031	0.13577	-0.41375	-0.734201	0.388343	-1.57546	-1.86138	-1.74467	-0.103506	0.477163	1.23369
clust1	ENSG00000147862	0.663512	-0.279019	-0.460861	0.512592	0.0452639	0.835955	0.794843	0.674358	0.879338	-0.246424	-0.516688	-0.292172	-1.75172	-1.93739	-1.81451	1.15835	0.676921	1.05765
clust1	ENSG00000227051	0.235178	0.715217	0.652385	0.719828	0.715328	0.797409	0.7119	0.391893	0.760741	-0.626017	-0.623958	-0.67604	-1.91707	-2.1241	-1.58822	0.688589	0.578387	0.588551
clust1	ENSG00000064309	1.23164	0.721659	0.461686	0.1962	0.212222	0.294892	0.804829	0.0601623	1.19289	-1.06263	-1.35285	-1.29993	-1.30531	-1.4199	-1.29734	0.608167	0.68196	1.27165
clust1	ENSG00000082497	0.656353	0.547192	0.459155	0.0880706	0.166574	0.126085	1.33024	1.03214	1.32757	-1.07902	-0.911339	-1.05432	-1.46357	-1.57657	-1.55101	0.744818	0.427455	0.730174
clust1	ENSG00000196154	1.01729	0.297501	0.067965	-0.402102	0.109579	-0.204281	1.16988	1.52298	1.19115	-1.03293	-0.597166	-0.361219	-1.69152	-1.81725	-1.23666	0.614823	0.602747	0.749217
clust1	ENSG00000152076	-0.215802	0.855287	0.554928	1.46778	0.238501	1.10801	-0.542106	0.200827	0.442699	-0.276019	-0.0700611	-0.00243677	-1.99336	-1.77668	-1.8078	0.857174	0.847517	0.111547
clust1	ENSG00000117394	-0.0920347	0.68251	0.73562	1.09843	1.11448	1.11393	0.236766	0.260708	0.266683	0.112341	0.111822	0.0766948	-1.97937	-2.01113	-2.01783	0.163267	0.0684052	0.0587194
clust1	ENSG00000138772	-0.365868	0.374852	0.361721	0.744564	0.852424	0.836273	0.352069	0.375759	0.379169	0.387058	0.409973	0.466053	-2.00948	-1.99924	-2.28377	0.395444	0.393876	0.329122
clust1	ENSG00000117602	0.52676	1.3182	1.07965	0.0971678	0.339527	0.208102	0.120718	-0.384659	0.25745	0.65264	0.534634	0.490767	-2.36103	-1.38779	-2.1715	0.484679	0.0917078	0.102989
clust1	ENSG00000134243	0.561408	0.468009	0.675086	0.343456	0.18544	0.282425	0.550022	0.220047	0.679221	0.464628	0.310467	0.261791	-2.19244	-2.18025	-2.07884	0.485914	0.445872	0.517745
clust1	ENSG00000205726	0.488862	1.12707	1.24072	-0.0134581	-0.0456579	0.0918039	0.648312	0.0542063	0.658261	0.287652	0.40184	0.235013	-2.17965	-2.14509	-1.77218	0.358269	0.23556	0.328464
clust1	ENSG00000135540	-0.269509	1.57397	1.48567	0.514342	0.435514	0.522476	-0.077689	-0.168219	-0.191955	-0.268797	-0.408049	-0.33297	-1.72429	-1.78364	-1.72656	0.747438	0.802046	0.870209
clust1	ENSG00000148400	-0.150593	1.18283	1.25822	0.341453	0.394371	0.467617	0.000429045	-0.0758091	0.0156747	-0.254378	-0.417406	-0.376964	-1.80918	-1.88669	-1.76208	1.06715	0.880016	1.12535
clust1	ENSG00000110042	-0.305051	0.984642	0.922298	0.629479	0.498652	0.658309	0.163361	0.00485159	0.141598	0.155858	0.107929	0.0762634	-1.81524	-2.14018	-2.14956	0.689055	0.684858	0.692882
clust1	ENSG00000131941	0.465842	0.834568	0.831784	0.572305	0.678649	0.566118	0.091973	0.00433876	0.00233531	-0.218421	-0.236034	-0.152683	-1.81829	-2.01107	-2.15437	0.849682	0.887836	0.805435
clust1	ENSG00000119866	1.46893	0.656108	1.17796	0.591699	0.0301728	0.772214	-0.190376	-0.10372	-0.0789626	-0.188229	-0.212965	0.0429761	-1.8951	-2.15777	-1.55949	0.954414	0.110336	0.581808
clust1	ENSG00000082397	0.439894	0.999315	0.65697	0.225289	0.333951	0.278513	0.0859628	-0.0224958	0.11246	0.0227334	-0.0634341	-0.0626103	-1.99341	-2.0015	-2.01467	1.07507	0.798857	1.12911
clust1	ENSG00000110660	0.830536	0.536773	0.718289	0.135024	0.289575	0.216719	0.103837	-0.0532968	0.0253022	-0.142871	-0.202259	-0.230811	-2.06898	-1.88538	-1.80045	1.20531	1.13796	1.18472
clust1	ENSG00000146950	-0.932331	1.50949	1.32585	0.506224	0.678144	0.716907	0.480602	0.0505373	0.482235	-0.816306	-0.934742	-0.81663	-1.35269	-1.64654	-1.40845	0.772745	0.457565	0.927386
clust1	ENSG00000138031	-0.066137	1.42471	1.72194	0.903676	0.930053	1.03107	-0.337998	-0.494678	-0.1805	-0.550902	-0.952436	-0.691626	-1.28373	-1.84543	-1.10662	0.716694	0.193501	0.588402
clust1	ENSG00000176463	-0.112609	1.10417	1.32246	1.02292	1.00658	1.09705	0.0759638	-0.166214	-0.126608	-0.89995	-0.925499	-1.0705	-1.35749	-1.48501	-1.54948	0.703144	0.791633	0.569429
clust1	ENSG00000158156	-1.10133	1.31048	1.25148	0.197894	0.818647	0.485363	-0.0079657	0.88022	0.0521226	-0.46073	0.341463	-0.172963	-1.55558	-1.15382	-2.42168	0.500151	0.616908	0.419346
clust1	ENSG00000055163	0.0478987	1.62055	1.53502	0.379861	0.471264	0.28241	0.234	0.11605	0.250485	0.186736	0.109071	-0.0310087	-1.68396	-2.03695	-2.06457	0.335255	0.123768	0.12411
clust1	ENSG00000170915	-0.00545315	1.80003	2.09847	0.353402	0.333719	0.0191155	0.254482	0.10516	0.637951	-0.442985	-0.304304	-0.432903	-1.39727	-1.59506	-1.87638	0.109664	-0.0192823	0.361648
clust1	ENSG00000196535	0.12017	2.02283	1.7679	0.427117	0.491855	0.529438	0.299726	0.180583	0.376112	-0.415952	-0.283734	-0.547844	-1.43123	-1.8849	-1.58788	-0.159059	-0.168886	0.263757
clust1	ENSG00000173402	-0.684988	1.95399	2.08323	0.577668	0.708536	0.773882	-0.0431412	-0.212708	0.0577912	0.0662642	-0.297886	-0.124885	-1.49841	-1.51813	-1.46542	-0.000868845	-0.26301	-0.111921
clust1	ENSG00000171552	-0.145578	2.1166	2.03859	0.372085	0.529945	0.388446	-0.522515	-0.0923121	-0.611693	0.126152	0.0203016	0.232955	-1.68391	-1.37573	-1.51955	0.041734	-0.00206572	0.0865519
clust1	ENSG00000177303	-0.324951	1.8446	2.05261	0.296644	0.183613	0.454332	-0.437471	-0.281304	-0.292825	0.341673	0.0105051	0.0327988	-1.62251	-1.7795	-1.50019	0.480597	0.113995	0.427385
clust1	ENSG00000205476	-0.205507	1.79707	1.58565	0.628042	0.473761	0.833079	-0.293517	-0.355674	-0.242987	0.289659	0.0680026	0.268782	-1.72031	-1.83139	-1.74762	0.193433	0.00752886	0.252
clust1	ENSG00000108001	0.486474	0.609569	1.4167	0.583363	0.719654	0.491281	-0.560944	-0.00238183	-0.794554	-0.694121	0.242029	0.340941	-1.90899	-1.10916	-1.74833	1.67932	0.795491	-0.546334
clust1	ENSG00000167536	0.72078	1.80817	1.83309	0.202772	0.436231	0.352293	-0.35595	-0.508423	-0.34327	-0.22924	-0.0163144	-0.694559	-1.6671	-1.53982	-1.56451	0.525669	0.664596	0.375576
clust1	ENSG00000247746	0.403319	2.14119	1.43231	0.561714	0.593851	0.125888	-0.259429	-0.836643	-0.439071	-0.235425	-0.311532	-0.324598	-1.68093	-1.6187	-1.2991	0.750421	0.728478	0.268257
clust1	ENSG00000085872	0.478045	2.17585	1.91804	-0.120864	-0.205044	0.0591788	-0.589505	-0.693109	-0.742769	-0.375015	-0.370389	-0.209447	-1.10133	-1.62394	-0.934573	0.881088	0.585072	0.868703
clust1	ENSG00000141577	0.614932	1.77939	1.85604	0.0241645	0.0689541	-0.0730726	-0.339859	-0.183156	-0.124973	-0.825844	-0.413024	-0.173127	-1.43735	-1.71535	-1.42527	0.861992	0.888094	0.617464
clust1	ENSG00000148297	0.665619	2.06765	2.12106	-0.148323	-0.264005	-0.182431	-0.341452	-0.34959	-0.162866	-0.192894	-0.396375	-0.0542625	-1.40457	-1.60298	-1.3367	0.651336	0.531691	0.399088
clust1	ENSG00000184162	0.949444	0.816097	1.71348	0.302778	0.0107136	-0.371309	-0.0767277	-0.408311	-0.26596	-0.212356	-0.145183	-0.3861	-2.01853	-1.89037	-0.968741	1.20849	1.21996	0.522618
clust1	ENSG00000249115	0.361723	1.15495	1.52526	0.233366	-0.00035419	-0.270598	-1.10986	-0.179429	-0.42543	-0.38516	-0.148971	-0.250976	-1.78914	-1.37528	-1.17322	1.12742	1.31902	1.38667
clust1	ENSG00000025770	0.597885	1.5298	1.54093	-0.0494539	0.0704805	-0.144882	-0.522034	-0.310662	-0.727802	-0.379235	-0.0634427	-0.312955	-1.78434	-1.42152	-1.3532	1.14553	1.1925	0.992391
clust1	ENSG00000170779	0.84544	1.15009	1.13833	0.119088	0.215769	0.055362	-0.788579	-0.614172	-0.687322	-0.174958	-0.185745	-0.16619	-1.56204	-1.73599	-1.36639	1.16216	1.29622	1.29894
clust1	ENSG00000151136	0.169729	0.630325	0.863633	1.0065	0.894219	0.97372	-1.05397	-1.07159	-1.15241	-0.502776	-0.540148	-0.597981	-1.21823	-1.09625	-1.07261	1.3199	1.18353	1.2644
clust1	ENSG00000156299	0.8229	1.1038	1.30363	0.927029	0.975825	0.997635	-1.10955	-1.40945	-1.24291	-0.302114	-0.441809	-0.38365	-1.29429	-0.924364	-1.13081	0.77793	0.437379	0.892817
clust1	ENSG00000065809	0.204418	0.757574	0.853552	1.01116	1.13775	1.2796	-0.733756	-1.09636	-0.827346	-1.32092	-1.31683	-1.15637	-0.640747	-0.621852	-0.640362	1.03035	0.921752	1.1584
clust1	ENSG00000143630	1.17841	0.163022	0.476819	1.04853	0.906088	1.0232	-0.853724	-1.46828	-0.327461	-0.811504	-1.23114	-1.36067	-0.670245	-0.546934	-0.900271	1.12511	1.02791	1.22113
clust1	ENSG00000187045	0.809496	-0.0426299	0.574425	1.35091	1.36742	2.01597	-0.186038	-0.836129	-0.0891409	-0.488349	-1.34844	-0.405225	-1.86609	-0.971024	-0.280383	0.078568	-0.446334	0.763004
clust1	ENSG00000156928	0.958346	0.0926889	-0.0342464	1.83654	1.51306	1.58955	-0.593342	0.0508355	-1.17756	-1.76503	-0.114585	-0.44621	-0.952861	-0.713577	-0.995165	-0.0438052	0.607885	0.187465
clust1	ENSG00000128408	-0.134577	1.30679	0.257433	1.48906	1.1655	1.90527	-0.977163	-1.18176	-0.863384	-0.510693	-0.703163	0.262018	-0.985462	-1.00155	-1.18176	0.409115	0.737047	0.00727699
clust1	ENSG00000204131	0.175518	0.412128	0.488136	1.87684	1.73637	1.83726	-0.69211	-0.801867	-0.550161	-0.254244	-0.424001	-0.396873	-1.30924	-1.22244	-1.23736	0.0411536	0.0406591	0.280215
clust1	ENSG00000142149	0.102307	1.03333	1.06766	1.26367	1.41334	1.46722	-1.00571	-0.834706	-0.830016	-0.276142	-0.191603	-0.342933	-1.42673	-1.44497	-1.29968	0.301836	0.493104	0.510038
clust1	ENSG00000153487	0.273822	1.24212	1.05692	1.54661	1.48165	1.59426	-0.866911	-0.827421	-1.09229	-0.327739	-0.209578	-0.388945	-1.19181	-0.979402	-1.34826	0.0144122	0.0674299	-0.0448826
clust1	ENSG00000267127	1.99759	-0.784417	-0.377955	0.40289	1.50685	0.654076	-0.687674	-0.696374	-0.0141105	-0.288178	0.5503	-0.371486	-0.932094	-1.20327	-1.24894	0.549586	1.75329	-0.810084
clust1	ENSG00000119285	2.54786	-0.0878273	0.120332	0.393428	0.541487	0.40715	-1.16483	-1.76077	-1.11128	0.625079	0.286613	0.382406	-0.674299	-1.22611	-0.859956	0.516842	0.408055	0.655817
clust1	ENSG00000182263	2.23687	0.385995	0.180478	0.736812	0.501409	0.709452	-1.32086	-1.44134	-1.04569	0.384476	0.395777	0.340313	-1.18525	-1.29827	-1.13349	0.54895	0.486412	0.517961
clust1	ENSG00000146263	2.17234	0.105957	0.324315	0.295009	0.395766	0.360794	-1.24653	-1.4331	-1.34366	0.268102	0.191444	0.216203	-1.00003	-1.06831	-1.1334	1.00648	0.944983	0.943627
clust1	ENSG00000189057	2.28732	-0.442285	-0.289859	0.701755	0.678701	0.727953	-1.20855	-1.19317	-1.29167	0.235897	0.340207	0.185275	-1.16681	-0.96448	-1.00504	0.694924	0.873377	0.836462
clust1	ENSG00000175768	2.29628	0.663268	-0.145698	0.0844677	0.290202	0.580928	-0.524574	-1.85538	-1.3725	-0.570237	0.104765	0.28901	-1.14704	-0.780724	-0.580235	1.16394	0.937673	0.565864
clust1	ENSG00000120526	2.93877	0.176613	-0.325837	0.393961	0.303399	0.29647	-0.717181	-1.00551	-0.869276	-0.490124	-0.41523	-0.364075	-1.06606	-0.776407	-0.860157	0.864681	0.922005	0.993955
clust1	ENSG00000020922	2.68854	0.382597	0.107979	0.257189	-0.00693785	0.0743703	-0.826051	-1.03085	-0.960352	0.00635938	-0.243667	-0.110431	-0.847938	-1.11686	-1.35617	0.991445	0.866992	1.12378
clust1	ENSG00000101868	3.14729	0.458849	0.184364	0.261745	0.292733	0.175798	-0.920395	-1.14045	-1.0088	-0.0396378	-0.30324	-0.238724	-0.735021	-0.957382	-0.926629	0.677148	0.537998	0.534353
clust1	ENSG00000138658	2.95003	0.422023	-0.0329867	-0.164502	0.00374353	-0.0662886	-1.05221	-1.20882	-1.14608	-0.0961498	-0.173463	-0.133627	-0.759844	-0.813399	-0.521539	0.879315	0.830191	1.0836
clust1	ENSG00000171451	1.81817	-0.548484	-0.288442	0.885886	1.2959	1.22264	-0.63882	-1.17071	-0.757173	-0.44142	-0.484881	-0.86896	-1.22308	-0.804038	-0.903363	0.821969	0.983492	1.1013
clust1	ENSG00000113460	1.7075	-0.179205	-0.697753	0.695284	1.01445	0.666378	-1.32732	-1.36617	-1.1417	-0.137109	-0.40527	-0.267525	-0.698493	-0.755765	-0.84051	1.29598	1.27973	1.1575
clust1	ENSG00000174891	1.46046	-0.190773	-0.496434	0.908549	0.435338	0.805108	-1.01587	-1.51689	-0.714585	-0.24312	-0.742746	-0.304687	-0.790471	-0.738518	-1.05359	1.71823	1.42164	1.05837
clust1	ENSG00000177054	2.28404	0.63772	0.689795	0.871372	0.582596	0.708792	-0.923934	-1.23261	-0.760864	-0.558704	0.213875	0.0944809	-1.14279	-1.31563	-1.51219	0.54902	0.516438	0.298587
clust1	ENSG00000040199	1.86734	1.00463	0.548777	0.693629	1.2477	1.12887	-0.880101	-1.05356	-0.618068	-0.156815	-0.819626	-0.510288	-0.962233	-1.46821	-1.30277	0.628065	-0.0483686	0.70104
clust1	ENSG00000134602	1.62792	0.228238	0.313109	1.19929	1.20295	1.15999	-1.23579	-1.32257	-1.17788	-0.0376279	-0.297937	-0.147898	-0.981454	-1.22417	-1.22579	0.648819	0.64257	0.628241
clust1	ENSG00000006062	-0.708841	0.380971	0.791344	-0.50652	-0.556113	-0.667061	0.384916	0.41449	0.347459	-0.0121502	-0.0766815	-0.117578	-1.49725	-1.45369	-1.49577	1.76458	1.39198	1.61591
clust1	ENSG00000132688	-0.27869	0.310711	0.373612	-0.686513	-0.703486	-0.692888	0.89482	0.819893	0.87498	0.0440121	0.00916957	0.166239	-1.65082	-1.6295	-1.65998	1.28526	1.24453	1.27866
clust1	ENSG00000140557	-0.271959	-0.2073	-0.0602589	-0.812084	-0.925894	-0.900749	0.464711	0.541202	0.623228	-0.304357	-0.395675	-0.240263	-1.01619	-1.01619	-1.01619	1.87479	1.71981	1.94335
clust1	ENSG00000151474	-0.025426	0.14267	0.0107879	-0.924052	-0.71005	-0.77309	0.648826	0.458565	0.608142	-0.567125	-0.533606	-0.38853	-1.06642	-1.1512	-1.08631	1.8174	1.6031	1.93631
clust1	ENSG00000084710	-0.0725435	0.498473	0.43668	-0.726172	-0.68296	-0.79093	0.671284	0.376125	0.486748	-0.314716	-0.35823	-0.294323	-1.23833	-1.30384	-1.58633	1.69769	1.46508	1.73629
clust1	ENSG00000101463	-0.0330481	0.511769	0.422503	-1.05884	-0.965156	-1.08943	0.36412	0.546443	0.52787	-0.212734	-0.470402	-0.399556	-1.08943	-1.06433	-1.08943	1.65765	1.67147	1.77054
clust1	ENSG00000169991	-1.2497	0.289208	0.15083	-0.922244	-0.814734	-0.821804	0.59976	0.92136	0.961754	-0.0830822	-0.0863021	-0.0510671	-0.860338	-1.26239	-1.31129	1.69156	1.32406	1.52442
clust1	ENSG00000186575	-1.17182	0.197973	0.132297	-0.54009	-0.833068	-0.84459	0.763575	1.11101	0.688908	-0.019939	0.173658	-0.261233	-1.20365	-1.38529	-1.24221	1.52101	1.53371	1.37975
clust1	ENSG00000120278	-0.791339	-0.107428	-0.107687	-0.930433	-0.849895	-0.857749	0.632794	0.585176	0.968353	-0.189369	-0.327508	-0.325846	-0.966821	-1.06297	-0.916761	1.71433	1.69093	1.84222
clust1	ENSG00000187720	-1.46354	-0.0223923	0.174466	-0.68159	-0.67485	-0.54668	0.75627	0.471381	1.01887	-0.254477	-0.386578	-0.300011	-0.765505	-1.24707	-1.04002	1.75402	1.48617	1.72154
clust1	ENSG00000112276	-0.945116	-0.207456	-0.338779	-0.156146	-0.130051	-0.0016266	0.460157	0.314116	0.461296	-0.63719	-0.230127	-0.515369	-1.01201	-1.43159	-1.15932	1.69917	1.814	2.01605
clust1	ENSG00000143816	-0.982203	0.257991	0.0882869	0.128398	-0.0969383	-0.470078	0.779802	0.26387	0.244286	-0.336255	-0.371584	-0.339789	-1.34019	-1.50386	-1.38703	1.52266	1.9033	1.63934
clust1	ENSG00000080573	-1.15354	0.0110485	-0.0522143	-0.290022	-0.35877	-0.349867	0.513429	0.461423	0.422396	-0.155543	-0.135186	-0.0866312	-1.39429	-1.2954	-1.36177	1.86854	1.56483	1.79157
clust1	ENSG00000130147	-1.10965	-0.145487	-0.0734656	-0.466126	-0.386946	-0.323966	0.996663	0.693169	0.942182	-0.17755	-0.114136	-0.223564	-1.19065	-1.59091	-1.3893	1.49177	1.49088	1.57709
clust1	ENSG00000166446	-0.70294	0.193314	0.36445	-0.410695	-0.313879	-0.127562	0.816824	0.562765	0.682758	-0.444637	-0.436381	-0.501668	-1.5474	-1.45287	-1.41079	1.57984	1.49341	1.65546
clust1	ENSG00000168778	-0.86489	-0.459417	0.236918	-0.63367	-0.543885	-0.364474	0.97739	0.492705	0.810379	-0.350608	-0.355535	-0.544499	-1.34236	-0.995117	-1.15058	1.6203	1.70744	1.75991
clust1	ENSG00000119333	-0.445898	0.789021	0.155191	-0.0397801	0.0114787	0.0350469	0.233629	0.65271	0.0498006	-0.63143	-0.320796	-0.784413	-1.60037	-1.39191	-1.52211	1.72997	1.5229	1.55696
clust1	ENSG00000140406	-1.76896	0.527955	0.43745	-0.0805208	-0.478914	0.0465366	0.649897	0.77487	0.598288	-0.381312	-0.46716	-0.500694	-1.34117	-1.07947	-1.32904	1.51932	1.40454	1.46839
clust1	ENSG00000187134	0.733725	0.332119	0.402522	-1.04566	-1.50892	-0.758377	0.258601	0.491813	0.147911	-0.948383	-0.791448	-0.450951	-0.543609	-0.780829	-0.671525	1.60615	1.64323	1.88362
clust1	ENSG00000102924	0.610401	0.485203	0.347115	-0.804785	-0.880522	-0.909113	0.488494	0.60412	0.0946149	-0.834327	-0.768719	-0.861086	-0.909113	-0.909113	-0.909113	1.81661	1.78341	1.55592
clust1	ENSG00000144834	0.4901	0.381616	0.300976	-1.01712	-0.724071	-0.564177	0.172611	0.543859	0.0467903	-0.752792	-0.522455	-0.732277	-1.01712	-1.01712	-1.01712	1.83267	1.88791	1.70772
clust1	ENSG00000171877	0.747357	0.932925	0.786025	-0.89001	-0.949475	-0.886378	0.283174	0.0387471	0.111156	-0.663544	-0.78324	-0.840287	-0.915207	-1.00805	-0.864084	1.70263	1.54303	1.65523
clust1	ENSG00000198216	0.249055	0.870323	0.680482	-0.868531	-0.868531	-0.868531	-0.0962504	0.424018	0.128854	-0.850139	-0.727491	-0.712712	-0.868531	-0.868531	-0.868531	1.91201	1.57866	1.75438
clust1	ENSG00000171310	0.194038	0.886644	0.938476	-1.16532	-1.07422	-1.14132	0.465803	0.325986	0.47216	-0.729927	-0.868809	-0.784738	-0.766289	-0.754294	-0.703337	1.58501	1.57729	1.54285
clust1	ENSG00000176749	0.118377	1.01898	1.32478	-0.836741	-1.04208	-0.7977	0.354896	0.189713	0.127975	-0.763826	-0.69282	-0.885301	-0.919061	-0.934328	-0.896736	1.74129	1.38565	1.50693
clust1	ENSG00000139970	0.131253	0.723837	1.1432	-0.969789	-1.05033	-0.802066	0.177283	0.254745	-0.337356	-0.236967	-0.389008	-0.496611	-1.01987	-1.02615	-1.09495	1.43576	2.02454	1.53248
clust1	ENSG00000249242	0.0437634	1.21328	0.943975	-0.940782	-0.882123	-0.545215	0.546535	0.179015	-0.192013	-0.960169	-0.739837	-0.430168	-0.781014	-1.16581	-1.02499	1.47066	1.89726	1.36763
clust1	ENSG00000171522	-0.527434	0.30661	0.610291	-0.852665	-0.93055	-1.05871	1.21331	0.924914	0.451897	-0.986685	-0.715158	-1.05857	-0.72894	-0.54352	-0.671704	1.19729	1.59676	1.77287
clust1	ENSG00000048052	0.165415	0.187339	0.1324	-1.05738	-1.01528	-1.07764	1.1646	0.606344	1.0816	-0.94486	-0.976304	-0.943844	-0.565701	-0.677453	-0.595386	1.52248	1.34383	1.64985
clust1	ENSG00000115107	0.0399065	0.4753	0.492893	-0.97813	-0.970133	-1.07828	1.03749	1.08581	0.992921	-0.980469	-1.021	-0.973661	-0.64078	-0.738495	-0.844345	1.3573	1.35066	1.39301
clust1	ENSG00000147481	-0.230018	-0.043783	0.0598942	-0.832593	-0.832593	-0.832593	0.85444	0.512225	0.232525	-0.312443	-0.759439	-0.760667	-0.832593	-0.832593	-0.832593	2.22677	2.02804	1.18801
clust1	ENSG00000109339	0.197906	0.034757	0.377007	-0.828713	-0.521715	-0.811772	0.356613	-0.0135943	0.428802	-0.814125	-1.0074	-1.05528	-0.710656	-0.65086	-0.615951	2.15637	1.9499	1.52872
clust1	ENSG00000138623	-0.103008	0.0272647	0.0154638	-0.858822	-0.909723	-0.999747	0.455869	0.341495	0.420077	-0.753452	-0.665526	-0.833216	-0.6968	-0.536144	-0.653019	1.92728	1.92275	1.89926
clust1	ENSG00000163449	0.171686	0.365262	0.523711	-0.849311	-1.0257	-0.995033	0.695156	0.389278	0.897366	-0.731444	-0.866734	-0.844347	-0.89614	-0.816089	-0.911067	1.68852	1.40974	1.79514
clust1	ENSG00000175426	0.0652453	0.640884	-0.0982694	-0.789111	-0.850708	-0.785314	0.703488	0.24967	0.665366	-0.926619	-0.905986	-0.824907	-0.886131	-0.799013	-0.730708	1.72684	1.65357	1.8917
clust1	ENSG00000075461	-0.321514	0.335671	0.317693	-0.63534	-0.63192	-0.706216	0.278588	0.399565	0.438601	-0.698397	-0.693106	-0.669875	-1.02434	-0.973834	-1.02434	1.86473	1.90133	1.84271
clust1	ENSG00000157851	0.136781	0.525999	0.507544	-0.845809	-0.742566	-0.779019	0.421204	0.442987	0.482448	-0.813032	-0.907736	-0.84043	-0.940011	-0.940011	-0.940011	1.71441	1.76127	1.75598
clust1	ENSG00000104490	-0.519909	0.427527	0.553913	-1.04272	-0.470442	-0.785269	0.235399	0.216624	0.392286	-1.0008	-0.622779	-1.0245	-0.583374	-0.588784	-0.756512	1.7496	1.95439	1.86535
clust1	ENSG00000162552	-0.832625	0.722394	0.37417	-0.77784	-0.638801	-0.741792	0.577749	0.636666	0.516174	-0.878384	-0.678382	-0.822906	-0.881595	-0.886578	-0.844804	1.67496	1.6316	1.85
clust1	ENSG00000140526	-1.35184	0.122613	0.212634	-0.644456	-0.553739	-0.593239	-0.318653	-1.11386	-0.499977	0.341315	-0.0855438	-0.150024	-0.197846	-0.517332	-0.555407	1.84525	1.89329	2.16682
clust1	ENSG00000089159	-1.0602	0.576141	0.478539	-0.775976	-0.84284	-0.879689	-1.02527	-0.442415	-0.796962	0.155643	0.371942	0.644533	-0.540359	-0.539387	-0.696425	1.96529	1.57518	1.83225
clust1	ENSG00000172031	-0.615216	0.804382	0.133787	-1.03433	-1.13513	-0.646622	-0.687663	-0.295414	-0.095012	-0.13455	0.301153	0.0266504	-0.625261	-0.815226	-0.849331	1.83707	1.83636	1.99436
clust1	ENSG00000065618	0.476473	0.997367	0.775731	-0.0741719	-0.934499	-0.850706	-0.782492	-0.934499	-0.934499	0.0189173	-0.010282	0.17211	-0.934499	-0.934499	-0.934499	1.00784	2.074	1.80221
clust1	ENSG00000101222	-0.658083	0.777281	0.115054	-0.254181	-0.675162	-0.930972	-0.312533	-0.735878	-0.484267	1.01279	0.246606	0.0399921	-1.17944	-0.980265	-0.943935	0.781029	2.052	2.12997
clust1	ENSG00000107130	-1.69114	-0.265228	-0.314437	-1.07771	-1.04317	-0.90367	0.441967	0.595219	0.505674	-0.147049	-0.175144	-0.0741512	-0.422728	-0.384241	-0.396874	1.71513	1.81555	1.822
clust1	ENSG00000115884	-0.926434	-0.0966969	0.0757604	-0.954568	-1.0244	-1.06768	0.279852	0.356609	0.289427	-0.165208	-0.0828743	-0.0797449	-0.843401	-0.676273	-0.799083	1.86127	1.9388	1.91464
clust1	ENSG00000151640	-0.926009	-0.240289	-0.302214	-0.943956	-0.853885	-0.825779	0.472567	0.715748	0.483104	-0.577052	-0.385557	-0.312762	-0.729279	-0.749776	-0.513137	1.90274	1.89505	1.89048
clust1	ENSG00000143473	-0.588023	-0.597353	-0.540078	-0.710333	-0.710333	-0.710333	0.0749422	-0.021642	0.865272	-0.366372	-0.377147	-0.31927	-0.643465	-0.649074	-0.710333	2.01368	1.94763	2.04223
clust1	ENSG00000157168	-0.88836	-0.313869	-0.326962	-0.756138	-0.820298	-0.744594	0.330705	0.176463	0.561516	-0.266325	-0.0873766	-0.181546	-0.685345	-0.976793	-0.842265	1.76861	1.7381	2.31448
clust1	ENSG00000136114	-1.02021	-0.715689	-0.496841	-0.881116	-0.85228	-1.2121	0.407539	0.485533	0.208447	0.147189	0.174169	0.00472656	-0.72866	-0.415422	-0.7194	1.91464	1.87143	1.82804
clust1	ENSG00000038382	-0.838839	-0.50899	-0.468361	-0.894672	-0.958149	-0.859296	0.598789	0.210403	0.516899	0.314708	0.154745	0.213952	-0.857303	-1.13589	-0.868952	1.74609	1.60884	2.02603
clust1	ENSG00000134121	-0.485059	-0.7283	-0.73815	-0.884499	-0.882672	-0.788457	0.791718	0.584776	0.667528	0.0611396	-0.115209	-0.078971	-0.915842	-0.915842	-0.915842	1.92779	1.67739	1.7385
clust1	ENSG00000170525	-1.24136	-0.381556	-0.502395	-0.274325	-0.53898	-0.608058	0.082277	0.101193	0.26543	0.0297788	-0.0629802	0.286639	-0.981582	-1.08701	-0.885615	1.86119	1.91271	2.02465
clust1	ENSG00000170921	-1.15301	-0.662998	-0.557443	-0.719132	-0.711936	-0.470081	-0.0564757	-0.310868	-0.0849936	0.56106	0.162314	0.133135	-0.543057	-0.846986	-0.637295	1.90792	1.68561	2.30423
clust1	ENSG00000168334	-0.796762	-0.796762	-0.358539	-0.226506	-0.796762	-0.0217686	0.0829097	0.0773928	-0.420088	0.264667	0.0637688	-0.624471	-0.625027	-0.796762	-0.796762	1.04729	2.77784	1.94634
clust1	ENSG00000163082	-0.661563	-0.148124	-0.185875	-0.585626	-0.877786	-0.180813	-0.455859	0.146058	-0.766518	0.218243	0.163496	0.220814	-0.804399	-0.930292	-1.06504	1.73039	2.21496	1.96794
clust1	ENSG00000188916	-0.859734	-0.393113	0.0269405	-1.0864	-1.00866	-0.626488	0.0189901	0.110518	-0.242626	0.779317	0.552496	0.0722861	-0.924374	-0.843659	-0.899789	1.54849	2.44654	1.32927
clust1	ENSG00000174792	-0.587422	-0.740094	-0.740094	-0.740094	-0.740094	-0.597139	-0.359983	-0.610563	-0.339467	0.217889	0.590883	-0.258527	-0.493561	-0.404884	-0.221316	2.44315	1.48412	2.09719
clust1	ENSG00000087494	-1.0391	-1.08677	-1.08677	-0.374435	-0.70211	-0.791298	-0.0486364	-0.0540009	-0.112666	0.0119327	0.008615	0.0426365	-0.268853	-0.105972	-0.392614	1.91059	1.92429	2.16515
clust1	ENSG00000211448	-0.791695	-0.80312	-0.940638	-0.536168	-0.654129	-0.940638	-0.194142	-0.198819	0.100818	0.532424	-0.0919335	0.124634	-0.578513	-0.283778	-0.677761	2.30699	1.61831	2.00816
clust1	ENSG00000147488	-0.386761	-6.54355e-05	-0.606866	-0.606866	-0.182554	-0.606866	-0.606866	-0.606866	-0.408779	-0.606866	-0.0590282	-0.247031	0.107618	-0.606866	-0.606866	2.06666	1.11744	2.84743
clust1	ENSG00000168658	-0.566253	-0.566253	-0.566253	-0.566253	-0.391845	-0.229846	-0.259716	-0.413411	-0.566253	-0.103417	0.0290728	-0.125656	-0.566253	-0.566253	-0.566253	1.85473	1.12906	3.04106
clust1	ENSG00000162723	-0.436772	-0.436772	-0.436772	-0.436772	-0.436772	-0.436772	-0.436772	0.070993	-0.436772	-0.436772	-0.436772	-0.436772	-0.436772	-0.436772	-0.436772	1.84082	1.07608	3.12692
clust1	ENSG00000164853	-0.0670487	-0.463421	-0.463421	-0.463421	-0.463421	-0.463421	-0.125009	-0.463421	-0.463421	-0.463421	-0.463421	-0.463421	-0.463421	-0.463421	-0.463421	2.22573	1.19825	2.79254
clust1	ENSG00000213085	0.442813	-0.368721	-0.952012	-0.787398	-0.101746	-0.281514	-0.273291	-0.888425	-0.0882712	-0.411597	-0.289084	-0.100474	-0.737586	-0.693449	-0.549491	2.13738	1.61869	2.32417
clust1	ENSG00000079263	0.37132	-0.205873	-0.201925	-0.439097	-0.478039	-0.434442	-0.451693	-0.541197	-0.583234	-0.494543	-0.631464	-0.587556	-0.631464	-0.551656	-0.44466	1.94123	1.90777	2.45653
clust1	ENSG00000204899	0.155618	-0.792029	-0.55554	-0.543086	-0.403144	-0.230171	-0.290469	-0.169223	-0.66256	-0.621499	-0.112297	-0.528088	-0.656512	-0.325954	-0.603083	2.10127	2.18267	2.0541
clust1	ENSG00000166396	-0.657447	-0.657447	-0.657447	-0.610495	-0.657447	-0.471869	-0.331833	-0.44885	-0.238133	-0.328738	-0.129835	-0.417286	-0.308628	-0.303083	-0.207163	2.24201	2.08589	2.09781
clust1	ENSG00000155511	-0.425912	-0.669763	-0.646083	-0.395273	-0.44936	-0.396102	-0.409182	-0.674955	-0.486882	-0.295475	-0.22908	-0.122171	-0.350818	-0.520241	-0.372949	2.2248	1.9712	2.24824
clust1	ENSG00000047936	-0.475368	-0.475368	-0.475368	-0.438281	-0.475368	-0.437366	-0.440753	-0.475368	-0.366463	-0.302871	-0.275589	-0.409026	-0.475368	-0.475368	-0.475368	1.95886	2.01421	2.50022
clust1	ENSG00000138675	-0.51648	-0.51648	-0.51648	-0.45131	-0.481642	-0.466146	-0.220941	-0.28765	-0.360642	-0.338931	-0.35797	-0.429428	-0.51648	-0.51648	-0.51648	2.14502	2.14615	2.20237
clust1	ENSG00000110427	-0.281222	0.0626314	0.130092	-0.636462	-0.583302	-0.540743	-0.454264	-0.579861	-0.647087	-0.203865	-0.0290385	-0.187471	-0.786748	-0.752139	-0.758596	2.19554	1.90096	2.15157
clust1	ENSG00000054967	-0.365861	-0.03527	-0.0271472	-0.749948	-0.576774	-0.814117	-0.554154	-0.688962	-0.313172	-0.41788	-0.246942	-0.337053	-0.0985611	-0.715819	-0.382747	1.91648	2.10192	2.30601
clust1	ENSG00000102385	-0.55331	-0.31633	0.105978	-0.794234	-0.595866	-0.68531	-0.434506	-0.45957	-0.444595	-0.261436	-0.36605	-0.377344	-0.379487	-0.45413	-0.388242	2.1964	2.05048	2.15756
clust1	ENSG00000154146	-0.288102	0.863444	-0.262047	-0.703581	0.0921004	0.333008	-0.369962	-0.626442	-0.915189	-0.532686	-0.460713	-0.724408	-0.724999	-0.579176	-0.915189	1.97854	2.17492	1.66047
clust1	ENSG00000184937	-0.944061	0.0538042	-0.774657	0.176164	0.168063	-0.00216746	-0.274443	-0.539083	-0.514044	-0.804803	0.0222236	-0.361968	-0.746583	-0.763076	-0.729911	2.3852	1.73353	1.91582
clust1	ENSG00000150048	-0.312514	-0.329093	0.763418	-0.529919	-0.529919	-0.529919	-0.529919	-0.529919	-0.529919	-0.342558	-0.529919	-0.529919	-0.529919	-0.529919	-0.529919	2.7104	1.87306	1.46639
clust1	ENSG00000171051	-0.187889	-0.217391	-0.169368	-0.575637	-0.575637	-0.575637	-0.575637	-0.575637	-0.575637	-0.241359	-0.575637	-0.575637	-0.258429	-0.284909	-0.231665	2.89176	1.37255	1.9318
clust1	ENSG00000205097	-0.408925	-0.408925	-0.408925	-0.408925	-0.408925	-0.408925	-0.408925	-0.408925	-0.408925	-0.408925	-0.408925	-0.408925	-0.408925	-0.408925	-0.408925	3.16621	1.30593	1.66173
clust1	ENSG00000255561	0.0927338	0.116281	0.14926	-0.566056	-0.459151	-0.973763	0.0764289	-0.0918364	-0.201829	-0.731149	-0.108411	-0.881739	-1.01184	-0.857058	-0.459028	2.50684	1.87755	1.52277
clust1	ENSG00000182968	0.41857	0.143673	0.468906	-0.661829	-0.661829	-0.661829	-0.284549	-0.103109	-0.661829	-0.661829	-0.661829	-0.661829	-0.661829	-0.661829	-0.661829	2.35909	1.88035	1.73536
clust1	ENSG00000100985	-0.203135	0.350076	0.452907	-0.762496	-0.734661	-0.762496	-0.361624	-0.30064	-0.360438	-0.40902	-0.545613	-0.327693	-0.671534	-0.740896	-0.736946	2.04004	2.01568	2.0585
clust1	ENSG00000112539	-0.0521769	0.621437	0.434454	-0.668666	-0.757761	-0.757761	0.0539385	-0.0826321	-0.264514	-0.757761	-0.676374	-0.677727	-0.757761	-0.757761	-0.757761	2.07043	2.08244	1.70595
clust1	ENSG00000086717	-0.726622	0.465622	-0.201123	-0.559541	-0.635175	-0.550513	-0.332676	0.28624	-0.0462166	-0.755294	-0.761014	-0.763904	-0.680841	-0.778661	0.0222464	2.10453	1.7195	2.19344
clust1	ENSG00000132429	-0.381139	0.141078	-0.0109009	-1.02742	-0.831693	-0.788658	-0.323086	0.0508391	0.481804	-0.193387	-0.221586	-0.60859	-0.655701	-0.70237	-0.865881	2.02982	1.60382	2.30304
clust1	ENSG00000114654	-0.431715	0.112209	0.334739	-0.68529	-0.716625	-0.716625	-0.0125559	0.228314	0.151043	-0.716625	-0.716625	-0.68849	-0.716625	-0.716625	-0.716625	2.16266	1.97009	1.87537
clust1	ENSG00000177508	-0.298013	-0.147084	0.508916	-0.591197	-0.469588	-0.532351	-0.278992	0.194454	0.246721	-0.60335	-0.760092	-0.812176	-0.812176	-0.812176	-0.812176	2.24694	1.80958	1.92277
clust1	ENSG00000182108	1.29081	-0.492185	-1.20286	0.576986	-0.441377	0.29556	-0.73957	0.0812494	-0.632529	0.344747	0.807279	0.0372076	-1.56067	-1.09528	-1.2573	1.25082	0.745062	1.99204
clust1	ENSG00000148019	0.972117	-0.266756	-0.341566	0.0692397	0.199703	0.164427	-0.602748	-0.910325	-0.535727	0.0641067	0.117959	0.038294	-1.27206	-1.46354	-1.34719	1.67135	1.68655	1.75616
clust1	ENSG00000182628	0.835231	-0.336017	-0.00904383	0.358536	-0.234901	0.258381	-0.366143	-0.348899	-0.348665	-0.375332	-0.539098	-0.526964	-1.21605	-1.24529	-1.36319	1.96999	1.77919	1.70826
clust1	ENSG00000106144	0.355821	0.231862	0.303473	-0.515678	-0.316371	-0.00965142	-0.604992	-1.00054	-0.726988	0.0723047	0.162568	-0.192955	-1.01056	-1.29667	-1.06839	1.89488	1.72651	1.99537
clust1	ENSG00000105447	0.901784	0.634753	0.585662	-0.290706	-0.508598	-0.564883	-0.851411	-0.454244	-0.345649	-0.0568889	-0.246177	0.0767958	-1.29668	-1.17698	-1.45175	1.67953	1.68397	1.68147
clust1	ENSG00000188229	0.592836	0.130745	0.137708	-0.627485	-0.655772	-0.73805	-0.153213	-0.161404	-0.229973	-0.0475409	-0.0215875	0.0236255	-1.28647	-1.26455	-1.2578	1.84162	1.8852	1.8321
clust1	ENSG00000134326	-0.345247	-0.150173	0.0794081	0.718268	0.709099	-0.127345	-0.875228	0.131001	0.54199	1.2401	-0.604943	-0.626965	-1.51873	-1.84306	-0.991218	0.50327	2.0858	1.07397
clust1	ENSG00000139734	0.52244	-0.773257	-0.694068	0.752869	0.751924	0.706523	0.0204887	-0.108633	-0.126535	0.218685	0.18477	0.194862	-1.66648	-1.74694	-1.89189	1.21061	1.1678	1.27684
clust1	ENSG00000165323	0.0542695	-0.132813	-0.163222	0.99226	0.862594	0.992092	0.168469	-0.0552829	0.237314	0.0775471	-0.0839549	-0.000404001	-1.95044	-1.93295	-1.94958	0.935588	0.864716	1.0838
clust1	ENSG00000109534	0.255132	0.608729	0.652654	0.921872	0.643515	0.696321	-0.882502	-0.675578	-0.413853	-0.290858	-0.0193841	1.00701	-1.68017	-1.66832	-1.91883	0.934196	1.0709	0.759158
clust1	ENSG00000174740	0.105166	0.192266	0.408518	1.27203	0.859404	1.10775	0.103435	-0.433185	-0.445298	-0.335939	-0.355151	-0.382724	-1.3448	-1.91405	-1.92094	1.05944	0.804329	1.21975
clust1	ENSG00000176095	-0.584003	0.445957	0.427656	1.39937	0.678288	1.04393	-0.118672	0.106089	-0.107714	-0.180306	-0.39117	-0.0637297	-1.65418	-2.18421	-1.57791	0.931162	0.863721	0.965714
clust1	ENSG00000105810	-1.77536	-1.16333	-0.983447	0.0945486	0.106292	0.218426	0.475029	0.241145	0.509403	0.766747	0.53454	0.544731	-1.04849	-1.33645	-1.20562	1.29088	1.28947	1.44149
clust1	ENSG00000152217	-1.79176	-0.584629	-0.874136	-0.245206	-0.227409	-0.117278	0.292762	-0.115154	0.656862	0.575981	0.846698	0.499827	-0.713303	-1.27563	-1.32761	1.2982	1.14178	1.96
clust1	ENSG00000104524	-2.09412	-0.786265	-0.933129	0.843417	0.196925	0.0148011	-0.155591	0.754439	-0.0318525	0.560798	0.775126	0.835426	-1.25412	-1.06578	-1.1268	0.880044	1.47966	1.10701
clust1	ENSG00000105991	-1.4328	-1.4328	-1.4328	0.286996	0.108453	0.264486	0.0538344	0.774511	0.270034	0.494825	0.204332	0.345246	-0.865558	-1.09522	-0.993354	1.30778	1.6538	1.48824
clust1	ENSG00000149639	-2.19224	-0.105041	0.084238	-0.0256875	-0.222369	0.065993	-0.436912	-0.917645	-0.155115	0.623154	0.215494	0.373566	-0.737335	-0.989806	-0.590553	1.7899	1.27183	1.94853
clust1	ENSG00000175866	-1.91702	-0.150905	-0.575058	0.167001	0.131175	0.163604	-0.931856	-0.842183	-0.607185	0.518248	0.413069	0.250698	-0.623679	-0.609623	-0.649694	1.90059	1.7139	1.64893
clust1	ENSG00000140848	-2.2544	0.140633	0.268291	0.454744	0.160397	0.673653	0.0599005	0.161454	-0.181812	-0.039799	-0.0773058	-0.430505	-1.06225	-1.18553	-1.22163	1.48451	1.56839	1.48126
clust1	ENSG00000141560	-1.82343	-0.448158	-0.32268	0.872575	0.721043	0.635659	-0.756708	-0.382997	-0.163298	0.15043	0.557565	0.547731	-1.07176	-0.997485	-1.60431	1.41535	1.43253	1.23794
clust1	ENSG00000020577	-1.60069	-0.311403	-0.00141325	0.286803	-0.15936	0.250248	0.199729	-0.190285	0.229646	0.254222	0.0549318	0.259088	-1.32502	-1.46323	-1.39759	1.70199	1.58775	1.62457
clust1	ENSG00000153976	-1.65895	-0.319156	-0.03719	-0.0861501	-0.155706	-0.171929	-0.0360064	-0.476051	-0.1963	0.510126	0.338241	0.580336	-1.17955	-1.11724	-1.1961	1.83425	1.65874	1.70864
clust1	ENSG00000212123	-0.594133	-1.60738	0.436768	0.817887	0.276319	-0.149382	-0.794625	0.352495	0.366796	0.688597	0.807373	-0.715277	-1.5189	-0.599041	-1.46978	2.10532	0.945875	0.651083
clust1	ENSG00000100218	-0.871537	-0.603605	-0.525365	-0.0532028	0.566573	-0.595867	-0.126047	0.836326	-0.618135	0.3872	-0.14876	-0.165593	-0.930694	-1.1971	-1.1971	2.29812	1.84306	1.10173
clust1	ENSG00000115850	-0.697165	-0.697165	-0.697165	0.765415	-0.697165	-0.317014	-0.697165	-0.0120943	-0.697165	-0.000646487	0.966338	0.293001	-0.697165	-0.697165	-0.697165	2.5585	2.09016	-0.0691778
clust1	ENSG00000120868	-0.387181	-1.79017	-0.881812	-0.00774662	-0.179463	-0.227895	-0.261973	-1.38828	0.214907	0.999256	0.544974	0.590537	-0.815685	-0.815084	-0.361707	1.58349	1.41748	1.76635
clust1	ENSG00000129749	-0.63739	-1.53354	-0.58039	-0.0564238	-0.21949	-0.905548	-0.319543	0.0483154	0.789594	0.564922	-0.351173	-0.00624508	-0.303415	-1.18714	-0.59808	1.90607	1.13486	2.25462
clust1	ENSG00000151612	-0.646789	-0.817836	-1.03444	-0.496078	-0.236864	-0.200146	-0.350136	-0.499221	0.207682	1.03615	0.759888	0.685644	-1.32643	-1.08787	-0.933743	1.5739	1.62583	1.74045
clust1	ENSG00000101230	-0.739919	-0.540464	-0.53729	-0.210014	0.113104	0.026326	-0.817533	-0.353052	-0.532481	0.862673	0.904067	1.10971	-1.20962	-1.3417	-1.3049	1.42871	1.56982	1.57257
clust1	ENSG00000185008	-1.03106	-0.537227	-0.337437	-0.413995	0.00383587	-0.227482	-0.25396	-0.33788	-0.177595	0.879177	1.059	0.782419	-1.34316	-1.39514	-1.29963	1.50391	1.50581	1.62041
clust1	ENSG00000115665	-0.266872	-0.0877797	-0.41165	-0.863753	-0.863753	-0.863753	-0.49413	-0.640868	-0.106192	0.577203	0.595033	0.514183	-0.863753	-0.863753	-0.863753	2.3958	1.76414	1.34365
clust1	ENSG00000153253	-0.68111	-0.68111	-0.68111	-0.371344	-0.68111	-0.68111	-0.391956	-0.537082	-0.527995	1.02707	0.432948	0.548513	-0.542203	-0.68111	-0.68111	2.91068	1.35691	0.862232
clust1	ENSG00000206579	-0.362837	0.106756	-0.148748	-0.0394341	-0.342634	-0.256957	0.372443	0.53063	0.0605028	0.625782	0.607173	0.787455	-1.81481	-1.81481	-1.81481	1.90581	0.632986	0.965497
clust1	ENSG00000115363	-0.475365	-0.107315	-0.153836	-0.401958	-0.275788	-0.136718	0.375067	0.0211011	0.0419078	0.28347	0.221466	0.567909	-1.54913	-1.78166	-1.5215	1.6702	1.70592	1.51622
clust1	ENSG00000235162	-1.02062	-0.44436	-0.296874	-0.333693	-0.248958	-0.32849	0.697654	0.474226	0.492145	0.384739	0.599188	0.673278	-1.55079	-1.68088	-1.57141	1.41682	1.47377	1.26425
clust1	ENSG00000139880	-0.635891	0.573457	0.639635	0.347058	-0.194805	0.153905	0.01768	-0.2071	-0.173125	0.667675	0.630371	0.251782	-1.76743	-1.92105	-1.91697	1.13502	1.06016	1.33963
clust1	ENSG00000078269	-1.08608	0.0642502	-0.0418358	0.214673	0.207978	0.200535	-0.0113253	-0.484196	0.0159949	0.521922	0.607422	0.541676	-1.69392	-1.80224	-1.52238	1.46455	1.342	1.46097
clust1	ENSG00000140443	-1.02809	0.406396	0.514746	0.0152595	-0.0824823	0.00923653	-0.277561	-0.652128	-0.24005	0.447356	0.302774	0.219308	-1.39115	-1.71314	-1.37479	1.58874	1.52219	1.73339
clust1	ENSG00000148841	-1.27412	0.0833691	-0.143013	0.622258	0.451538	0.546293	-0.0549572	0.0342788	-0.344664	0.172822	0.102964	0.233928	-1.64737	-1.64597	-1.52568	1.45664	1.27677	1.65493
clust1	ENSG00000132031	-1.04528	0.279369	0.192994	-0.0114843	0.0637864	0.460378	0.400183	0.0888592	0.267532	0.350926	0.301149	-0.064403	-2.03683	-1.40816	-1.87119	1.21423	1.55163	1.26631
clust1	ENSG00000158163	-1.25506	-0.536552	0.0346373	0.34053	0.400838	0.379276	0.511713	-0.0349082	0.681503	0.124284	0.0919732	0.118958	-1.70877	-1.54727	-1.7224	1.30322	1.40395	1.41408
clust1	ENSG00000162669	-0.351115	-0.577815	-1.51436	0.164144	0.291335	0.779571	0.16903	-0.073582	0.292036	0.115144	0.696767	0.513957	-1.6887	-1.50024	-1.08115	2.24008	1.07543	0.449471
clust1	ENSG00000204388	-0.65243	-1.1817	-1.29993	0.902233	-0.068833	0.621858	0.381868	0.544758	0.113293	0.469207	0.198942	0.712717	-1.76064	-1.53163	-1.08733	1.11867	1.32094	1.19799
clust1	ENSG00000100413	-1.44924	-0.711743	-0.459597	-0.159154	-0.461731	0.0148375	0.372674	0.854092	0.310804	0.11019	1.04596	1.24353	-1.3793	-1.30916	-1.56942	1.01998	1.18541	1.34187
clust1	ENSG00000135002	-0.856062	-1.0763	-0.855788	-0.276749	0.117591	-0.340384	1.02847	0.42384	0.88714	0.761124	0.916893	0.906871	-1.51338	-1.25504	-1.7763	1.01157	1.12283	0.773663
clust1	ENSG00000111348	-1.47894	-1.14631	-1.25026	-0.241458	0.0622002	-0.376519	0.832735	0.926729	0.83832	0.561643	0.664089	0.523039	-1.27278	-0.842668	-1.36494	1.10561	1.28628	1.17324
clust1	ENSG00000176014	-1.10924	-1.38096	-1.4417	-0.0127131	-0.0823691	-0.0715115	0.788079	0.841096	0.722084	0.5153	0.644547	0.663108	-1.25164	-1.21577	-1.20164	1.21309	1.25502	1.1252
clust1	ENSG00000119508	-1.45569	-0.429696	-0.728788	-0.384631	0.725018	0.594502	0.59313	-0.0483406	0.39942	1.05951	0.239151	1.33821	-1.83302	-1.55542	-1.12135	0.44214	1.27825	0.887597
clust1	ENSG00000198354	-1.34996	-0.152577	-0.172217	0.151131	-0.0940499	0.261903	0.646314	0.116422	1.24666	1.13601	0.128655	0.779814	-1.66063	-1.78535	-1.71703	1.17424	0.742055	0.548599
clust1	ENSG00000261150	0.0300545	1.35088	1.32482	-0.987728	-1.01327	-0.714471	0.643885	0.314613	0.745551	1.21894	1.19387	1.20169	-1.22858	-1.26799	-1.15282	-0.331377	-0.811951	-0.516125
clust1	ENSG00000076706	-0.598813	0.824973	0.955496	-0.548596	-0.359556	-0.613408	0.525808	0.686062	0.488084	1.23292	1.28589	1.33302	-1.61958	-1.68219	-1.67891	0.0241757	-0.109136	-0.146233
clust1	ENSG00000089472	-0.195005	0.723861	0.712489	-0.902517	-0.899514	-1.01596	0.736049	0.758131	0.746532	1.43957	1.43971	1.35	-1.25404	-1.394	-1.3599	-0.229985	-0.338199	-0.317212
clust1	ENSG00000122733	-0.73287	0.894152	1.66165	0.286132	-1.2721	0.173714	-0.540329	0.978676	0.11513	1.5418	0.547765	1.15976	-1.00627	-1.44797	-1.44797	-0.135272	-0.813183	0.0371756
clust1	ENSG00000128655	-0.317931	0.4662	1.3994	-0.81251	-0.877426	-0.732121	-0.355502	0.595929	0.297129	1.99295	1.10796	1.75025	-0.835836	-0.732535	-0.962155	-0.113311	-0.96219	-0.908296
clust1	ENSG00000047597	-0.552176	1.35271	2.29142	-0.798831	-0.14283	-0.783651	0.373063	0.222022	-0.22507	1.62503	0.540821	-0.628123	-1.26998	-1.20794	-1.07718	0.473032	-0.483865	0.291535
clust1	ENSG00000138311	-1.16867	0.363564	1.71913	-0.597745	-0.761342	-1.06804	-0.216809	-0.222548	-1.07184	1.47574	1.33912	0.423735	-1.0808	-0.547567	-1.16867	0.940477	0.765392	0.876888
clust1	ENSG00000107438	0.276735	1.12803	1.13344	-0.509658	-0.360055	-0.454961	0.624712	0.808664	0.569036	0.88035	0.999151	1.03408	-1.82731	-1.78686	-1.66366	-0.341921	-0.175151	-0.334624
clust1	ENSG00000153904	-0.0269857	1.16336	1.38495	-0.260986	-0.381513	-0.320132	1.02892	0.870669	0.982545	0.47217	0.444799	0.587619	-1.63109	-1.78644	-1.97653	-0.175195	-0.146243	-0.229926
clust1	ENSG00000145990	1.13755	1.14782	1.02382	-0.615085	-0.900828	-0.430022	0.637334	0.380192	1.14191	0.31867	0.432296	0.251372	-1.76557	-1.88471	-1.68836	0.379837	0.238991	0.194791
clust1	ENSG00000163249	0.947434	0.906759	0.977195	-0.573698	-0.689197	-0.467424	0.995929	0.921108	0.924908	-0.0455498	0.0674044	0.217927	-1.86791	-1.76557	-1.83152	0.594205	0.310781	0.37722
clust1	ENSG00000151079	-0.0200967	1.6434	1.52035	-0.39089	-0.471248	-0.962006	0.655027	0.164466	0.948644	0.0386333	0.38133	0.386021	-1.68756	-1.68756	-1.68756	0.436617	0.238585	0.493855
clust1	ENSG00000162522	0.429083	1.7834	1.70784	-0.497975	-0.547846	-0.586269	0.444918	0.286356	0.351506	0.482964	0.380902	0.432495	-1.72913	-1.71161	-1.68313	0.234217	-0.00271281	0.224992
clust1	ENSG00000156395	-0.690848	1.21578	0.403273	-1.16398	-1.16398	-1.07321	1.47922	0.663553	1.09922	0.821497	0.309763	0.220813	-1.16398	-1.16398	-1.16398	0.0366088	1.50626	-0.17205
clust1	ENSG00000012817	0.469999	0.944383	0.937705	-1.3648	-1.3648	-1.3648	0.708428	0.552935	0.759215	0.600723	0.547379	0.606474	-1.3648	-1.3648	-1.3648	0.730854	0.664321	0.666388
clust1	ENSG00000169862	-0.00226378	0.990707	1.03251	-1.31484	-1.21286	-1.17538	0.632712	0.721417	0.696542	0.81242	0.942264	0.60346	-1.41295	-1.44219	-1.44219	0.327882	0.52898	0.713778
clust1	ENSG00000182013	0.0192502	1.16064	1.26951	-1.35776	-1.59338	-1.22495	0.715993	0.505183	0.733575	0.72062	0.742851	0.74266	-1.18977	-1.11567	-1.41509	0.501728	0.332806	0.451806
clust1	ENSG00000168528	-0.144246	1.27128	1.41894	-1.01284	-1.01982	-1.17268	0.552181	1.01179	0.655151	0.248175	0.362599	0.148151	-1.55679	-1.47063	-1.37154	0.82245	0.608905	0.648909
clust1	ENSG00000117318	0.464367	1.13723	1.09422	-1.21409	-1.25011	-1.15423	0.950339	1.08837	0.920457	0.211956	0.308731	0.385428	-1.53611	-1.39106	-1.3462	0.450156	0.483429	0.397114
clust1	ENSG00000175701	0.350829	1.2731	0.828599	-1.32619	-1.32619	-1.32619	0.648698	1.15956	0.503344	0.16414	0.327243	0.540638	-1.32619	-1.32619	-1.32619	0.797178	0.737845	0.625989
clust1	ENSG00000154917	0.127828	1.01164	1.06669	-0.744648	-0.916636	-0.875092	1.0388	1.10525	0.956916	0.418054	0.385098	0.318403	-1.77989	-1.67527	-1.59759	0.223587	0.520415	0.416456
clust1	ENSG00000132563	0.107424	1.53635	1.60442	-1.1546	-1.06043	-0.968642	0.963853	1.08445	0.883594	-0.0703985	-0.0896134	-0.00384673	-1.22189	-1.35139	-1.41132	0.342439	0.444576	0.365017
clust1	ENSG00000161642	-0.238741	1.35121	1.37921	-1.5169	-1.1353	-0.822398	0.683458	1.35247	0.786324	0.292119	0.0281313	0.226168	-1.20407	-1.47089	-1.22346	0.630152	0.43021	0.452293
clust1	ENSG00000018236	1.46698	0.474636	0.81076	-1.19453	-1.13099	-1.17989	0.16296	0.248631	0.296838	1.22938	1.11867	1.11334	-1.35192	-1.36253	-1.36253	0.216116	0.187677	0.25641
clust1	ENSG00000165246	1.49705	0.705435	0.785758	-1.23487	-1.23487	-1.23487	0.044903	-0.227757	-0.0648117	1.21057	1.10955	1.1027	-1.23487	-1.23487	-1.23487	0.442333	0.350217	0.453269
clust1	ENSG00000034533	0.935025	1.13676	0.981891	-1.30753	-1.62214	-1.40164	0.236604	-0.0776272	0.261805	0.93	0.84721	0.854492	-1.32006	-1.06786	-1.10404	0.600986	0.689629	0.426497
clust1	ENSG00000121691	0.812043	0.868834	0.551306	-1.41593	-1.24841	-1.34389	0.289078	0.586331	0.579837	0.837304	0.817111	0.910663	-1.38714	-1.24029	-1.51239	0.622884	0.675828	0.596832
clust1	ENSG00000183878	1.36901	0.790073	0.557582	-1.33493	-1.33493	-1.33493	0.255175	0.398772	0.527061	0.88696	0.894481	0.764138	-1.33493	-1.33493	-1.33493	0.563473	0.449558	0.55332
clust1	ENSG00000100505	1.64225	1.32807	1.39359	-1.21837	-1.29015	-1.29098	0.521004	0.142119	0.413722	0.222282	0.254374	0.103325	-1.20703	-1.15737	-1.26846	0.21083	0.4926	0.70819
clust1	ENSG00000245680	1.20524	1.61196	1.23671	-1.36856	-1.32658	-1.32852	0.285751	0.161491	0.212408	0.332963	0.597309	0.626307	-1.2027	-1.29362	-1.11879	0.5286	0.470701	0.36935
clust1	ENSG00000095261	1.37827	1.01904	0.801717	-1.4726	-1.24328	-1.15352	-0.113731	-0.272269	0.161995	0.481953	0.429643	0.397426	-1.23926	-1.29336	-1.04893	1.06333	1.18256	0.921009
clust1	ENSG00000177932	1.60251	0.983712	0.823485	-1.28208	-1.28208	-1.28208	0.00945412	-0.28208	0.494232	0.734075	0.748707	0.549669	-1.24419	-1.28208	-1.26142	0.788907	0.47548	0.705764
clust1	ENSG00000214026	0.781868	1.21485	0.927241	-1.23583	-1.35326	-1.06378	0.480124	0.217102	0.17391	0.772009	0.472407	0.415448	-1.16436	-1.59133	-1.52274	0.800568	0.762705	0.91308
clust1	ENSG00000169641	1.02923	1.118	1.31128	-1.22382	-1.31838	-1.1622	0.273211	-0.518506	0.203687	0.896267	0.561336	0.706571	-1.19769	-1.47037	-1.19115	0.61619	0.519397	0.846963
clust1	ENSG00000182957	1.09559	1.10445	1.40542	-1.01246	-1.23545	-1.22113	0.136991	-0.142801	-0.0319343	0.42915	0.56287	0.630508	-1.42654	-1.41523	-1.28615	0.820533	0.79566	0.790531
clust1	ENSG00000164695	1.01147	1.69419	1.32208	-1.10126	-0.922144	-0.761712	-0.631173	0.00791556	0.297179	0.780768	0.987994	1.48294	-1.58055	-0.811871	-0.755748	0.142902	-0.48483	-0.678158
clust1	ENSG00000113657	0.869884	1.21929	1.24689	-1.19952	-1.25756	-1.22704	0.434867	0.294574	0.441971	0.996998	0.932682	1.01337	-1.25987	-1.39123	-1.33012	0.0225985	0.0576652	0.134541
clust1	ENSG00000176399	1.48706	1.35534	1.21011	-0.90139	-0.998282	-1.36953	0.242372	0.0656818	0.54803	1.19179	0.680253	1.01379	-1.16887	-1.13632	-1.11925	-0.662119	-0.423719	-0.0149504
clust1	ENSG00000170430	-0.159569	1.40087	1.547	-1.2411	-1.15785	-1.14165	0.589411	0.970099	0.363502	0.703407	0.918029	0.889419	-1.26101	-1.2447	-1.24169	0.138382	0.265684	-0.338245
clust1	ENSG00000101417	-0.0220372	1.80536	1.61464	-1.1557	-1.2034	-1.1277	0.611757	0.37636	0.60378	0.803105	0.817694	0.736041	-1.18898	-1.25823	-1.13444	0.0130185	-0.0577373	-0.233527
clust1	ENSG00000160221	0.26971	1.51339	1.7367	-1.41982	-1.23634	-1.25013	0.585323	0.434022	0.629282	0.616178	0.528738	0.687233	-1.22743	-1.35071	-1.018	0.121113	0.17421	0.20653
clust1	ENSG00000103226	-0.174451	1.37248	1.11208	-1.438	-1.39041	-1.48886	0.47089	0.0850058	0.352964	0.990972	1.12529	0.984793	-1.12402	-1.21396	-0.90005	0.45668	0.369558	0.409058
clust1	ENSG00000185164	-0.41924	0.963901	0.999219	-1.83908	-1.65489	-1.67733	0.57618	0.322244	0.647373	1.14412	1.10646	1.2222	-0.479317	-0.712366	-0.543123	0.152672	0.037808	0.153173
clust1	ENSG00000167535	-2.04645	0.0881795	0.198878	-0.269433	-0.377094	-0.495973	0.873225	1.4089	0.795392	0.387328	0.372214	0.412699	-1.39596	-1.72828	-0.981633	0.981735	0.998211	0.778066
clust1	ENSG00000167657	-1.73582	-0.273585	-0.459332	-0.125286	-0.161852	-0.261881	0.932826	1.31457	1.06599	0.1537	0.231114	0.303098	-1.66671	-1.27205	-1.31404	1.12096	1.08675	1.06153
clust1	ENSG00000072110	-1.32701	-0.315576	-0.282675	-1.03364	-0.996557	-1.01716	1.10968	1.11117	1.11629	0.769874	0.753118	0.756585	-1.12573	-1.19683	-1.10718	0.964554	0.86111	0.959966
clust1	ENSG00000065357	-1.69429	-0.064996	-0.29264	-0.792946	-0.997186	-0.992626	1.3898	1.22666	1.59949	0.370405	0.582152	0.541363	-1.06107	-0.933293	-1.04929	0.687561	0.735306	0.7456
clust1	ENSG00000182446	-1.93957	-0.15716	0.0424437	-1.1549	-0.909191	-0.859051	1.41227	1.18638	1.14069	0.572122	0.340952	0.42048	-0.983243	-0.847939	-0.947424	0.957921	0.877056	0.848166
clust1	ENSG00000127663	-1.8955	0.254805	0.469619	-0.817558	-0.5812	-0.84574	1.1238	1.1353	1.53105	0.543273	0.545398	0.422436	-1.06252	-1.50423	-1.10977	0.580831	0.462811	0.747198
clust1	ENSG00000100345	-1.99972	-0.222038	-0.184045	-0.593263	-0.552563	-0.559699	1.03175	0.939859	1.04879	0.70782	0.666972	0.661966	-1.18988	-1.40523	-1.19238	0.974472	0.861109	1.00607
clust1	ENSG00000145901	-2.44225	-0.102079	-0.126044	-0.627805	-0.545609	-0.796678	1.20465	1.09931	1.0138	0.50002	0.670829	1.01056	-0.883101	-1.0987	-0.929058	0.751341	0.731396	0.569412
clust1	ENSG00000136295	-1.53602	0.323718	0.432371	-1.14689	-1.2228	-1.12973	1.20102	1.20676	1.1346	-0.175264	-0.380323	-0.223863	-0.66432	-0.808654	-0.624973	1.23213	1.12424	1.25801
clust1	ENSG00000006327	-1.14683	0.0782934	-0.0552372	-1.1208	-1.17299	-1.24127	1.12926	1.40542	1.13062	-0.0700011	-0.0769213	0.0489802	-1.06967	-0.790672	-0.759698	1.26101	1.32942	1.12107
clust1	ENSG00000172732	-1.08396	0.421148	0.206921	-0.987785	-1.20051	-0.876297	1.1606	1.50437	1.26879	-0.36834	-0.184703	-0.19488	-1.07945	-1.07223	-0.910849	1.10927	1.14929	1.1386
clust1	ENSG00000086289	-1.37105	0.105184	0.211437	-1.04819	-1.24592	-1.42296	1.46145	1.50112	1.42494	0.136854	0.406896	0.316202	-0.879077	-0.750934	-0.935166	0.725545	0.774795	0.58887
clust1	ENSG00000182541	-0.927704	0.193808	0.224821	-1.54335	-1.4097	-1.50981	1.18394	1.11143	1.15729	0.474031	0.358788	0.470859	-0.831829	-0.904092	-0.849234	0.887735	0.993233	0.919791
clust1	ENSG00000113070	-1.00448	-0.690513	-0.548565	-0.488345	-0.71155	-0.467328	1.23159	1.20884	1.21489	0.145029	0.0304994	0.150694	-1.35789	-1.17303	-1.324	1.31368	1.21144	1.25904
clust1	ENSG00000142627	-0.710543	-0.354981	-0.144583	-0.630255	-0.656306	-0.701799	1.15964	1.1832	1.21927	-0.0878793	-0.0800579	-0.159205	-1.35838	-1.27742	-1.39765	1.33476	1.30589	1.3563
clust1	ENSG00000123130	-1.25387	-0.327967	-0.329409	-0.618028	-1.03416	-0.968937	1.3038	1.36674	1.16285	-0.0207026	0.421827	0.184644	-1.05536	-0.721045	-1.48723	1.26489	1.1374	0.974559
clust1	ENSG00000135622	-1.39095	0.00987563	-0.254973	-0.863549	-0.750837	-0.771238	1.26904	1.13445	1.28378	-0.015638	0.136145	-0.0372681	-1.13415	-1.04197	-1.26498	1.31185	1.14634	1.23408
clust1	ENSG00000036448	-0.639292	-0.223852	-0.160329	-1.00361	-0.936455	-1.05584	1.26318	1.81856	0.841689	0.115682	0.443202	-0.108022	-1.17003	-1.17003	-1.17003	1.35486	0.654532	1.14579
clust1	ENSG00000148484	-0.132341	-0.204482	-0.182681	-1.18201	-1.14231	-0.980954	1.28138	1.38231	1.31227	0.230901	0.181295	0.21294	-1.33602	-1.20968	-1.2471	0.999963	1.00239	1.01413
clust1	ENSG00000134504	-0.794833	0.293381	0.21356	-1.06536	-0.759386	-0.785082	1.11673	1.35106	1.20623	-0.0784337	0.0622164	0.0541001	-1.42167	-1.4829	-1.21659	1.18284	0.981945	1.14219
clust1	ENSG00000118523	-0.572377	-0.0205185	0.00779045	-0.636442	-0.622523	-0.652998	1.59447	1.60508	1.55966	-0.144554	-0.111169	-0.163001	-1.48037	-1.33704	-1.40501	0.81669	0.806343	0.755962
clust1	ENSG00000142871	-0.351771	0.123114	0.137495	-0.671818	-0.666557	-0.669222	1.40134	1.33622	1.37683	-0.0880218	0.0390776	-0.00629286	-1.60979	-1.49096	-1.5917	0.966196	0.92731	0.838549
clust1	ENSG00000157654	-0.684041	0.281211	0.451117	-0.688192	-0.729422	-0.715682	1.03964	0.658862	1.12314	0.760784	0.585835	0.605902	-1.6733	-1.81124	-1.61766	0.834063	0.674297	0.904683
clust1	ENSG00000071127	-0.774849	0.495413	0.457371	-0.921026	-0.961196	-0.900704	1.05257	1.09729	1.02676	0.477779	0.493238	0.460418	-1.56906	-1.56419	-1.46735	0.884774	0.871453	0.841303
clust1	ENSG00000130402	-1.2239	0.538409	0.563751	-0.71595	-0.735659	-0.689251	1.21397	1.11274	1.21447	0.315223	0.413221	0.465678	-1.57675	-1.61142	-1.43494	0.767316	0.643564	0.739521
clust1	ENSG00000184545	-1.66797	0.637274	0.392928	-0.451797	-0.553697	-0.0600244	0.836469	0.971326	1.09382	0.210172	-0.125835	0.309394	-1.48777	-1.43449	-1.68207	0.983568	1.11903	0.909668
clust1	ENSG00000069188	-1.16603	0.632573	0.681649	-0.37824	-0.385246	-0.428494	0.938842	0.655317	0.962587	0.438839	0.234165	0.214016	-1.68985	-1.80107	-1.72587	0.885478	0.819616	1.11172
clust1	ENSG00000225968	-1.05693	0.949378	0.735245	-0.278848	-0.343516	-0.398766	0.752788	0.852375	0.834583	0.101527	0.0555384	-0.165374	-1.70991	-1.72848	-1.70833	1.02886	0.992721	1.08714
clust1	ENSG00000137877	-1.04772	0.4096	0.582337	-0.277138	-0.1002	-0.516399	0.926587	0.209163	0.308193	0.288858	-0.00767671	0.367101	-1.84025	-1.59045	-1.62313	1.62985	1.23325	1.04803
clust1	ENSG00000075624	-1.05275	0.290101	0.302479	-0.452034	-0.359182	-0.364629	0.663426	0.766932	0.560846	0.542305	0.550379	0.551513	-1.78558	-1.74067	-1.77234	1.11398	1.18683	0.998389
clust1	ENSG00000136274	-1.26895	0.149708	0.210198	-0.569606	-0.36476	-0.281006	0.888419	0.851995	0.837915	0.260706	0.25869	0.180512	-1.57518	-1.62084	-1.65052	1.35661	1.18144	1.15467
clust1	ENSG00000143367	-1.17303	0.454789	0.400202	-0.575174	-0.383955	-0.386531	0.80879	0.931568	0.891555	0.315731	0.298897	0.278434	-1.60091	-1.79183	-1.68126	1.08962	1.10995	1.01316
clust1	ENSG00000099917	-2.0496	-0.343329	-0.317006	-0.632205	-0.574389	-0.35765	0.91697	0.793903	0.853103	-0.0107826	0.165416	0.162338	-0.938098	-1.15267	-0.904025	1.47269	1.34315	1.57217
clust1	ENSG00000165617	-1.4635	-0.187286	-0.20468	-0.730262	-0.78749	-0.742325	0.735846	0.606164	0.771828	0.276436	0.158542	0.243482	-1.15733	-1.05131	-1.21108	1.57448	1.55959	1.60891
clust1	ENSG00000099284	-1.77871	-0.191388	-0.305769	-0.324529	-0.451957	-0.372597	0.789542	0.942441	0.681992	-0.425368	-0.299423	-0.244579	-0.990435	-0.89791	-1.04784	1.63861	1.70196	1.57596
clust1	ENSG00000139722	-2.08451	-0.176329	-0.173192	-0.47107	-0.2958	-0.108716	0.70688	0.706913	0.125002	0.079682	-0.0396906	0.199247	-1.15234	-1.26363	-0.825045	1.55359	1.53932	1.67969
clust1	ENSG00000277586	-0.461664	0.0669819	0.0167957	-1.17245	-0.918913	-1.00398	0.589164	0.677831	0.588653	0.484537	0.524569	0.484774	-1.40615	-1.33539	-1.37722	1.4138	1.4257	1.40297
clust1	ENSG00000144583	-0.557607	0.0301259	-0.0965334	-1.16651	-0.944736	-1.02528	0.813223	0.59562	0.539811	0.191088	0.183044	0.0276921	-1.17833	-1.17368	-1.12427	1.68692	1.56549	1.63393
clust1	ENSG00000162631	-0.333397	-0.106017	0.162324	-1.2089	-1.17313	-1.1774	0.897406	0.716707	0.572283	0.207467	0.200005	0.0785794	-1.13146	-1.06774	-1.21186	1.6277	1.54299	1.40444
clust1	ENSG00000138411	-0.795744	-0.309487	-0.14974	-0.779478	-0.798575	-0.831483	1.25002	0.53593	0.841802	0.297051	0.152586	0.240117	-1.43766	-1.273	-1.25409	1.48357	1.16518	1.663
clust1	ENSG00000104722	-0.292326	-0.296408	-0.288346	-1.16718	-0.977555	-0.723406	0.960816	0.995394	0.974114	0.0803157	0.0199437	0.0988414	-1.31624	-1.15221	-1.27531	1.46915	1.46409	1.42631
clust1	ENSG00000110880	-0.331529	-0.385918	-0.38447	-0.942805	-0.910638	-0.924736	0.906502	0.697332	0.924048	0.208503	0.225387	0.163473	-1.23087	-1.3006	-1.269	1.56101	1.48107	1.51325
clust1	ENSG00000106617	-0.789409	-0.552726	-0.528414	-0.618546	-0.925217	-0.756869	0.548567	0.568048	0.695117	0.580959	0.682252	0.68299	-1.41677	-1.3345	-1.19929	1.47596	1.32209	1.56575
clust1	ENSG00000156510	-1.16531	-0.150384	-0.182778	-0.706684	-1.17653	-0.883196	0.602546	1.27739	0.628236	0.621277	0.490338	0.942214	-1.31782	-1.16653	-1.30212	1.49388	1.03715	0.958313
clust1	ENSG00000283930	0.829756	0.140028	-0.539425	-1.07627	-1.07627	-1.07627	1.52989	0.305591	1.65808	0.585223	-0.371801	-0.250383	-1.07627	-1.07627	-1.07627	1.5899	0.0932722	0.887518
clust1	ENSG00000133107	1.23276	-0.171839	-0.509016	-1.47931	-1.37265	-1.21996	1.31184	1.13076	1.15413	0.0771304	0.337527	0.0901622	-1.08009	-1.0474	-0.928308	0.863535	0.766792	0.843928
clust1	ENSG00000131437	1.07941	-1.43989	-1.32099	-1.0326	-1.14566	-1.1893	1.156	0.946145	1.35621	0.346842	0.452304	0.218085	-0.482473	-0.994164	-0.52957	0.694873	0.843837	1.04094
clust1	ENSG00000135048	0.018759	-0.78279	-0.73244	-1.22812	-1.24825	-1.26863	1.26409	1.07021	1.34555	0.446078	0.357762	0.354206	-0.924542	-0.993334	-0.91303	1.07486	1.02515	1.13446
clust1	ENSG00000137941	0.104717	-0.821063	-0.776373	-1.19794	-1.18253	-1.255	1.35685	1.12102	1.35481	0.321011	0.0614841	-0.122511	-0.789524	-0.909134	-0.796175	1.16029	1.11459	1.25549
clust1	ENSG00000198692	0.725999	-0.0563622	-0.0166343	-1.31856	-1.31856	-1.2863	0.871351	1.00779	0.818223	0.41984	0.584897	0.707035	-1.31856	-1.31856	-1.31856	0.85778	1.02537	0.933834
clust1	ENSG00000083720	0.591923	0.263	0.281172	-1.3654	-1.36909	-1.19823	1.00812	0.968564	1.05591	0.51711	0.484499	0.570483	-1.31557	-1.38296	-1.41703	0.71925	0.786487	0.801766
clust1	ENSG00000129824	0.610025	0.444072	0.356863	-1.35072	-1.35072	-1.35072	0.815601	1.18356	0.771043	0.418147	0.598368	0.546226	-1.35072	-1.35072	-1.35072	0.766244	0.856222	0.737963
clust1	ENSG00000134330	0.174745	0.249873	0.191194	-1.31837	-1.34315	-1.36187	1.06421	0.997755	1.07979	0.812199	0.693935	0.774572	-1.30442	-1.30346	-1.33647	0.604645	0.596667	0.728144
clust1	ENSG00000198105	0.581639	0.263706	-0.0975906	-1.32195	-1.3334	-1.32167	0.877204	0.62519	0.933528	0.946576	0.870647	0.976852	-1.3334	-1.3334	-1.3334	0.676556	0.703354	0.619574
clust1	ENSG00000215131	-0.0907144	0.449715	0.461422	-1.29627	-1.29627	-1.29627	1.32679	0.91037	0.9966	0.233308	0.569934	0.815109	-1.29627	-1.29627	-1.29627	0.197195	1.02355	0.884368
clust1	ENSG00000120675	-0.0573361	0.137946	0.144633	-1.33697	-1.35581	-1.32785	1.21931	1.20414	1.22104	0.831008	0.892268	0.870372	-1.23437	-1.23745	-1.16648	0.356281	0.445135	0.394121
clust1	ENSG00000214517	-0.266195	0.0746291	-0.00304135	-1.196	-1.22358	-1.05392	1.30116	1.3867	1.27873	0.721089	0.664363	0.758977	-1.34184	-1.39014	-1.25292	0.521121	0.535578	0.485303
clust1	ENSG00000067646	0.508341	-0.388984	-0.112091	-1.26761	-1.26761	-1.26761	0.564086	0.425097	0.551883	1.04652	1.02634	0.925509	-1.26761	-1.26761	-1.26761	1.07825	0.946584	1.03413
clust1	ENSG00000081842	0.376841	0.566287	-0.0735532	-1.2127	-1.44674	-1.27603	0.334964	0.016865	0.616678	0.971535	0.946349	0.986974	-1.24418	-1.44426	-1.11329	0.741298	0.935525	1.31743
clust1	ENSG00000129317	1.02798	0.156593	-0.0324534	-1.24454	-1.3037	-1.26975	0.171251	-0.0579113	0.289201	1.18015	1.13142	1.04979	-1.25965	-1.26571	-1.25353	0.947806	0.813966	0.919068
clust1	ENSG00000137871	1.1712	0.0707469	-0.130716	-1.22596	-1.35151	-1.29438	0.578697	0.400676	0.761133	0.740774	1.06207	0.782457	-1.19918	-1.3767	-1.38997	0.656356	0.972295	0.772001
clust1	ENSG00000075407	1.46601	0.0617524	-0.0173132	-1.26377	-1.29974	-1.30051	0.589254	0.359121	0.706148	0.667987	0.633362	0.514939	-1.30347	-1.31139	-1.30174	0.843559	0.829422	1.12638
clust1	ENSG00000067048	1.41691	0.274313	0.0838873	-1.32747	-1.32747	-1.32747	0.618377	0.469778	0.643955	0.786542	0.752119	0.726152	-1.32747	-1.32747	-1.32747	0.729509	0.682132	0.781138
clust1	ENSG00000114374	1.37891	0.191424	0.302638	-1.33356	-1.33356	-1.33356	0.604555	0.395386	0.639241	0.751959	0.670048	0.724868	-1.33356	-1.33356	-1.33356	0.806011	0.774467	0.761838
clust1	ENSG00000187325	1.00458	0.394115	0.433994	-1.54319	-1.40737	-1.42777	0.453036	0.392582	0.436209	0.36295	0.617024	0.591799	-1.34102	-1.17221	-1.05279	1.10608	0.990968	1.16102
clust1	ENSG00000278318	0.506907	0.0900951	0.150549	-1.25495	-1.30466	-1.33784	0.982452	0.530227	0.562045	0.165826	0.607489	0.619762	-1.27272	-1.40367	-1.20627	1.29353	1.08605	1.18517
clust1	ENSG00000008735	0.560254	-0.34671	0.379309	-0.259511	-0.56482	-0.0751561	-0.0638934	0.397651	0.0951911	0.596901	0.526321	0.887557	-1.80919	-1.88933	-1.8884	1.13643	0.997072	1.32033
clust1	ENSG00000088387	0.310802	0.528776	0.451728	-0.0964805	0.039521	0.00315224	0.155152	-0.141625	0.172611	0.568218	0.432915	0.415111	-2.05632	-2.05556	-1.93475	0.99161	1.01131	1.20384
clust1	ENSG00000150471	0.858023	0.581699	0.612432	-0.211436	-0.237707	-0.310562	0.51807	0.106455	0.409161	0.76573	0.561965	0.509113	-1.95568	-2.12489	-2.02629	0.606442	0.534009	0.803468
clust1	ENSG00000087085	0.623079	-0.12753	-0.280294	-1.18746	-0.407994	-0.0550227	0.827049	1.13324	0.988653	1.02395	0.900113	0.367288	-1.81378	-1.69193	-1.61923	-0.0119966	0.255602	1.07626
clust1	ENSG00000133169	0.707029	0.335773	0.31534	-0.596013	-0.52828	-0.559239	0.697564	0.862835	0.667579	0.228704	0.338023	0.37258	-1.90905	-1.90136	-1.8545	0.928301	0.987441	0.907273
clust1	ENSG00000139971	0.500154	-0.350612	-0.191251	-0.429636	-0.258098	-0.48139	1.16373	0.637473	1.2818	0.39867	0.196638	-0.00658124	-1.56404	-1.85543	-1.9336	0.870749	0.814242	1.20717
clust1	ENSG00000106484	0.130065	0.0863715	0.084915	-0.784738	-0.722542	-0.792591	0.99881	0.955021	1.00331	0.975026	1.03837	1.00694	-1.70907	-1.71188	-1.71586	0.373567	0.407483	0.376795
clust1	ENSG00000187601	-0.259247	-0.179364	-0.408703	-0.715695	-0.721046	-0.84363	1.16524	1.11782	1.22203	0.671307	1.08038	0.961387	-1.52849	-1.46028	-1.72875	0.52167	0.610335	0.495039
clust1	ENSG00000137573	0.0136771	-0.400751	-0.443975	-0.167636	-0.184741	-0.259698	1.19254	1.0037	1.25966	1.11417	1.06296	1.05345	-1.83553	-1.61854	-1.73567	-0.104261	-0.0023153	0.0529689
clust1	ENSG00000164176	0.287008	-0.335398	-0.222693	-0.481861	-0.508664	-0.456158	1.48458	1.30072	1.49784	0.879916	0.870507	0.834648	-1.57858	-1.57228	-1.63672	-0.139791	-0.136428	-0.086644
clust1	ENSG00000101198	-0.538261	-0.127802	-0.204853	-0.652371	-0.649089	-0.696976	1.40834	1.56786	1.34095	0.89358	0.946702	0.908938	-1.67439	-1.39018	-1.33716	-0.0421009	0.0900747	0.156736
clust1	ENSG00000135931	-0.361347	0.226944	0.373601	-0.337821	-0.449114	-0.30812	1.2697	1.13946	1.26797	0.989724	0.93902	0.879537	-1.68861	-1.81406	-1.6944	-0.102503	-0.299591	-0.0303803
clust1	ENSG00000166432	-0.720796	0.468497	-0.128754	-0.41405	0.155486	-0.297698	0.692854	0.350325	1.57548	1.16264	0.998269	1.02539	-1.99357	-1.67891	-1.53061	0.549149	-0.194305	-0.0193879
clust1	ENSG00000130176	-1.27332	-0.491207	-0.561824	-0.0174308	-0.0672507	-0.042287	0.926897	1.03081	0.910911	1.20875	1.28181	1.25382	-1.74579	-1.46124	-1.45588	0.158999	0.185007	0.159232
clust1	ENSG00000022267	-0.81424	-0.495381	-0.484823	-0.101179	-0.0689441	-0.117983	1.17585	1.14771	1.21932	0.986918	1.01008	0.983303	-1.71142	-1.71373	-1.63666	0.148388	0.265048	0.207737
clust1	ENSG00000165996	-0.788447	-0.217656	-0.368758	-0.244845	-0.454298	-0.315402	1.21146	1.2112	1.30379	0.741588	0.804656	0.951498	-1.5685	-1.62969	-1.8624	0.462675	0.413064	0.35006
clust1	ENSG00000155957	-0.781017	-0.00469269	-0.375331	-0.912353	-0.511849	-1.73604	1.17378	1.19593	1.06733	0.467297	0.808225	0.909331	-1.37756	-1.11263	-1.17152	0.662031	0.619965	1.07912
clust1	ENSG00000149256	-1.35453	-0.262132	-0.0796447	-0.81751	-0.772568	-0.783117	1.2628	0.683955	1.04992	1.1826	1.0371	0.945888	-1.26467	-1.36843	-1.37708	0.414252	0.686712	0.816455
clust1	ENSG00000253846	-0.732964	-0.211208	-0.112078	-1.30553	-1.44721	-1.26626	1.16907	0.589042	1.09426	1.02874	0.824719	0.52112	-1.02539	-1.20632	-0.829343	0.988056	0.77915	1.14214
clust1	ENSG00000110900	-0.178022	0.0269845	0.0808854	-0.989317	-1.22526	-1.3967	0.245149	0.563189	0.923136	1.39324	1.18766	1.75063	-0.724669	-1.41407	-1.19502	0.273438	-0.22032	0.899061
clust1	ENSG00000114670	0.438124	0.0318599	-0.19765	-0.966466	-1.32433	-1.37459	0.79609	0.521094	0.350985	1.11136	1.21265	1.72276	-1.24846	-1.25894	-1.23788	0.681628	0.561745	0.180037
clust1	ENSG00000198001	0.252297	0.393305	0.567171	-1.34041	-1.27967	-1.28444	0.66493	0.664449	0.626096	1.19882	1.23321	1.05244	-1.37451	-1.34643	-1.31746	0.441226	0.569035	0.27994
clust2	ENSG00000135094	1.94807	-0.135674	1.79631	-1.02399	-0.707572	-1.02399	-0.744677	-1.02399	0.391884	1.8042	0.540007	0.0206977	-0.756249	-0.537517	0.633881	0.037622	-0.449454	-0.769559
clust2	ENSG00000175315	0.889445	2.17621	2.27036	-0.785882	-0.370268	-0.382247	-0.785882	-0.785882	-0.785882	0.994262	0.593574	-0.271119	-0.599632	-0.311101	0.321867	-0.596056	-0.785882	-0.785882
clust2	ENSG00000187583	0.62688	2.51626	1.66486	-1.00893	-0.645054	-0.658202	-0.947642	-0.696536	-0.940254	0.824851	1.09022	0.412809	-0.109909	0.000999043	-0.202092	-0.763023	-0.493722	-0.671508
clust2	ENSG00000106785	1.18995	2.10396	2.29071	-0.463283	0.0101498	-0.220507	-1.13251	-1.35071	-1.02574	0.427217	0.381217	0.186116	-0.298348	-0.388005	-0.450381	-0.263683	-0.256239	-0.739912
clust2	ENSG00000160602	1.15432	2.05945	2.42144	-0.284891	-0.175939	-0.0430771	-1.04984	-1.12741	-0.867954	0.465579	0.472214	0.134903	-0.229696	-0.834328	-0.40713	-0.57438	-0.565925	-0.547336
clust2	ENSG00000146021	0.72876	2.18578	2.50426	-0.563086	-0.485549	-0.504781	-1.04445	-1.28709	-0.894874	0.693838	0.138409	0.21521	-0.342489	-0.272011	-0.121617	-0.311208	-0.390325	-0.248783
clust2	ENSG00000162139	1.03541	2.10022	2.11815	-0.431796	-0.667143	-0.41407	-1.07035	-1.46059	-0.948925	0.805267	0.460113	0.427246	-0.176164	-0.842509	-0.354714	-0.291866	-0.221346	-0.0669313
clust2	ENSG00000127481	0.456814	2.00428	2.18403	-0.473785	-0.504146	-0.427428	-1.04751	-1.68516	-0.814888	0.883705	0.506733	0.436965	0.306981	-0.467482	0.295906	-0.583003	-0.850887	-0.221126
clust2	ENSG00000064687	0.867785	2.01634	2.1635	-0.717157	-0.720812	-0.41997	-1.39549	-0.850023	-0.721643	0.412805	0.71692	0.754703	-0.00389705	-0.00539067	0.206495	-0.619224	-0.844626	-0.840325
clust2	ENSG00000065923	1.46371	1.72674	1.85732	-0.473701	-0.644807	-0.4764	-1.09139	-1.13554	-1.06065	0.727821	0.787278	0.734696	0.147918	0.0980906	-0.0949703	-0.980806	-0.843441	-0.74188
clust2	ENSG00000076554	1.12232	1.84206	1.91289	-0.396117	-0.444179	-0.336203	-1.04715	-1.02601	-0.943225	0.952306	0.830697	0.863835	-0.191369	-0.178769	-0.0903754	-1.03798	-0.96722	-0.865504
clust2	ENSG00000172215	0.489699	1.00563	1.66717	-0.678041	-0.275985	-0.310274	-1.04985	-1.38061	-1.38061	0.852503	1.07566	0.458268	0.158089	-0.521127	1.82526	-0.116417	-1.0369	-0.782455
clust2	ENSG00000140545	0.476998	1.39358	1.38818	-0.768714	-0.796841	-0.776457	-0.842256	-0.777444	-0.749831	1.37132	1.37609	1.38798	0.143478	0.188703	0.180964	-1.04114	-1.12103	-1.03358
clust2	ENSG00000167964	0.84103	1.68072	1.39076	-0.522266	-1.02694	-1.05768	-0.908063	-0.657034	-1.53195	0.647326	0.910928	0.660694	0.578397	1.0892	0.327677	-0.556874	-0.688124	-1.1778
clust2	ENSG00000141052	-0.130574	1.10197	1.28444	-1.4128	-1.34399	-1.17919	-0.588505	-0.885297	-0.585233	1.42496	1.33897	1.19285	-0.469949	-0.827884	-0.597217	0.616743	0.504074	0.556621
clust2	ENSG00000148798	1.28274	1.37271	1.34333	-1.23972	-1.2989	-1.2401	-0.758417	-0.621509	-0.741843	0.901207	0.943133	0.923316	-0.85386	-0.895262	-0.679953	0.585555	0.378714	0.59885
clust2	ENSG00000183578	0.242793	0.846493	0.635944	-0.526006	-1.02596	-0.76377	-0.904943	-0.788187	-1.02596	0.650289	1.48566	1.66637	-1.02596	-1.02596	-1.02596	0.690119	0.409858	1.48519
clust2	ENSG00000197261	1.02679	0.916194	0.654464	-0.83931	-1.04201	-0.880771	-1.13998	-1.29266	-1.31848	1.05397	0.891828	1.00572	-0.490476	-0.720703	-0.828746	1.13803	0.899838	0.966317
clust2	ENSG00000171502	0.922229	-0.142231	0.754721	-1.41557	-1.31517	-1.53258	-0.874729	-1.45743	-0.814564	0.463138	0.818839	0.913797	0.585073	-0.0534595	-0.210986	0.956261	1.11745	1.28521
clust2	ENSG00000054356	-0.862854	0.776029	0.599291	-1.53079	-1.21239	-1.49364	-0.90112	-0.707237	-1.10696	0.753467	0.904795	0.83875	0.252361	0.0954913	-0.0948126	1.18647	1.25892	1.24424
clust2	ENSG00000172137	-0.277948	0.881365	1.02001	-0.892548	-1.00935	-0.911627	-1.59394	-1.2657	-1.10091	0.579214	0.737787	0.700729	-0.384224	-0.402248	-0.100723	1.46632	1.3153	1.23849
clust2	ENSG00000138823	0.817043	1.34637	-0.67291	-0.708295	-0.947964	-0.947964	-0.947964	-0.947964	-0.947964	1.40148	1.33006	2.04756	0.100705	-0.557106	0.406808	-0.299237	-0.715451	0.242794
clust2	ENSG00000110002	0.610248	1.7062	1.59836	-0.555266	-0.630611	-0.759707	-1.46828	-1.68722	-1.39115	0.908323	1.03403	0.962502	-0.24583	-0.109605	-0.178516	0.0994237	0.0606607	0.0464485
clust2	ENSG00000188167	1.01161	1.48	1.19132	-0.913346	-0.626344	-0.743542	-0.631772	-1.9832	-1.20682	1.01412	0.0563232	1.63808	0.650534	-0.456663	-0.507889	-0.0498229	-0.26864	0.346065
clust2	ENSG00000137364	1.69177	1.24404	1.20536	-1.06909	-1.09249	-1.39818	-0.20282	-0.58746	-0.59506	1.10841	0.960895	0.992652	-0.745654	-0.793848	-1.29215	0.207931	0.217876	0.147831
clust2	ENSG00000196604	1.6275	1.02543	1.33545	-1.04119	-1.04119	-1.04119	-0.335412	-0.51884	-0.0861619	1.55518	0.913125	1.14439	-1.04119	-1.04119	-1.04119	-0.164865	-0.160523	-0.0881186
clust2	ENSG00000183454	1.96515	1.23017	1.46162	-0.816329	-0.667911	-0.58893	-0.847522	-0.624624	-0.709958	1.27167	0.921806	0.970206	-0.973658	-0.973658	-0.973658	-0.0829653	-0.283387	-0.278027
clust2	ENSG00000188219	1.50825	1.4874	1.77802	-0.860079	-0.790228	-0.792437	-0.444359	-0.561391	-0.543101	1.62899	0.940536	0.483966	-0.860079	-0.860079	-0.860079	-0.566093	-0.312172	-0.37707
clust2	ENSG00000126838	1.75279	0.880801	0.467786	-0.899744	-0.412927	-0.899744	-0.469766	-0.899744	-0.746913	1.65943	1.34058	1.66301	-0.62366	-0.77271	-0.452822	-0.899744	-0.307055	-0.379559
clust2	ENSG00000123612	2.40242	1.21222	0.358198	-0.615051	-0.933924	-0.870546	-0.407786	-0.470352	-0.621441	0.765519	0.660461	1.63655	-0.955791	-0.857333	-1.07561	-0.139799	-0.443313	0.355583
clust2	ENSG00000187010	1.46534	1.27485	0.402384	-1.15431	-0.614141	-0.807058	-0.333893	-0.899341	-0.470722	1.26195	0.99281	2.00929	-0.720897	-1.1387	-0.782274	0.304234	-0.634395	-0.155129
clust2	ENSG00000177301	0.964361	1.5896	0.449498	-1.07171	-0.0487839	-0.342461	-1.29559	-0.181219	-1.23073	2.15818	0.740089	1.14794	-0.578568	-0.862985	-0.838364	-0.559817	-0.356673	0.317229
clust2	ENSG00000086205	1.49441	0.418659	-0.286249	-0.709046	-0.865696	-1.04394	-0.731196	-0.131786	-0.877865	1.96123	1.10084	0.936162	-1.04394	-1.04394	-1.04394	0.967174	0.0615784	0.837557
clust2	ENSG00000050438	1.16363	0.821651	0.796953	-0.180605	0.0486967	-0.0528605	-1.0326	-1.09828	-0.807862	1.41345	1.28166	1.09466	-1.45656	-1.40462	-1.46324	0.357058	0.124652	0.39422
clust2	ENSG00000077522	1.39221	0.63849	0.422871	-0.322242	-0.681677	-0.552362	-0.794983	-0.691803	-0.609492	1.7169	1.64357	1.62446	-1.12004	-1.1045	-1.1066	0.0529631	-0.232577	-0.275187
clust2	ENSG00000183908	1.05176	0.678563	0.974247	-0.450519	-0.474407	-0.514024	-0.825232	-0.848467	-0.784296	1.62285	1.57087	1.55108	-1.19125	-1.19125	-1.19125	0.0296189	-0.0772065	0.068924
clust2	ENSG00000176595	-0.459673	1.26363	1.24496	-0.103262	-0.16839	-0.222365	-0.174645	-0.0937266	-0.256577	0.0171174	-0.0151819	-0.196291	-1.71892	-1.46307	-1.69353	1.36054	1.39186	1.28752
clust2	ENSG00000142197	0.0554459	1.28221	1.2657	-0.667838	-0.510186	-0.677593	0.0401394	-0.414753	0.0308859	0.0788821	-0.336724	-0.233568	-1.45767	-1.39323	-1.38865	1.44215	1.41362	1.47118
clust2	ENSG00000183579	-0.103665	1.20029	1.31514	-0.437038	-0.553901	-0.31429	0.0417683	-0.063412	0.278801	-0.219561	-0.352543	-0.437301	-1.44416	-1.60555	-1.49416	1.42459	1.26592	1.49908
clust2	ENSG00000123374	0.289076	0.538706	0.490946	0.000975257	-0.244961	-0.182731	-0.341387	0.231337	-0.432651	-0.656747	-0.366919	-0.505801	-1.1947	-1.45788	-1.46679	1.69994	1.94174	1.65784
clust2	ENSG00000123416	0.762609	0.545534	0.41532	-0.222	-0.35208	-0.20609	-0.387773	0.290471	-0.541581	-0.341541	-0.127132	0.115497	-1.58282	-1.58462	-1.56024	1.58287	1.55954	1.63404
clust2	ENSG00000166483	0.45086	0.87803	1.03874	-0.129261	-0.265056	-0.188351	-0.093967	-0.25889	-0.0286413	-0.58431	-0.669678	-0.50369	-1.38699	-1.45213	-1.51286	1.57476	1.55781	1.57362
clust2	ENSG00000118655	-0.0493847	0.824587	0.902169	-0.621604	-0.542116	-0.371239	-0.234036	-0.0826934	-0.0218235	-0.175138	-0.168682	-0.358987	-1.45528	-1.31731	-1.40751	1.72853	1.65983	1.69069
clust2	ENSG00000186684	0.404291	0.762147	0.844775	-0.503249	-0.525933	-0.358701	0.0811999	-0.0962295	-0.202338	-0.722687	-0.116743	-0.522728	-1.59591	-1.40188	-1.05124	1.85004	1.57371	1.58147
clust2	ENSG00000175344	0.870759	1.10584	0.853211	-0.0218749	-0.059509	0.135603	-0.0854485	-0.354252	-0.239176	-1.31681	-0.671372	-0.68659	-0.763535	-1.53256	-1.39241	1.32748	0.78946	2.04118
clust2	ENSG00000162636	1.59593	0.731768	0.734366	0.136788	0.510733	0.306995	-0.603441	-0.579341	-0.471858	-0.602502	-0.518479	-0.765483	-1.39141	-1.33851	-1.53101	1.23678	1.18741	1.36126
clust2	ENSG00000173848	1.49849	0.64441	0.620904	-0.00339433	-0.106987	-0.103339	-0.144407	-0.26651	-0.238743	-0.525029	-0.486388	-0.590377	-1.48268	-1.53399	-1.53241	1.42212	1.41675	1.41158
clust2	ENSG00000196368	0.933092	0.929436	0.732189	0.442856	0.100477	0.110095	-0.301124	-0.212934	-0.413851	-0.511619	-0.613939	-0.666258	-1.44442	-1.49211	-1.74522	1.29307	1.42389	1.43636
clust2	ENSG00000012963	1.46693	1.1167	0.822048	-0.303923	-0.453035	-0.333483	-0.829226	-1.06565	-1.04242	-0.154543	0.10665	-0.320454	-1.07545	-0.989222	-1.17251	1.41363	1.432	1.38195
clust2	ENSG00000077152	1.52967	0.822875	1.05275	-0.141109	-0.395938	-0.405234	-0.755322	-0.986465	-1.02269	-0.167407	-0.295115	-0.229825	-1.30269	-0.916172	-1.05912	1.30051	1.56514	1.40615
clust2	ENSG00000168496	1.36184	0.787636	0.853554	-0.133729	-0.203883	-0.0344356	-0.699384	-0.635548	-0.793867	-0.33349	-0.187971	-0.344456	-1.28087	-1.24944	-1.50782	1.49764	1.52931	1.37491
clust2	ENSG00000112029	1.5372	0.85477	0.88963	-0.042485	-0.0761302	-0.194908	-0.978837	-1.07837	-1.01464	-0.415507	-0.296298	-0.385796	-1.00716	-1.04587	-1.07414	1.47195	1.45027	1.4063
clust2	ENSG00000120802	1.28295	0.853058	1.06789	-0.0415971	0.0451561	0.0328049	-1.05219	-1.17532	-1.02308	-0.167519	-0.278596	-0.297391	-1.17429	-1.20064	-1.05159	1.38342	1.38898	1.40795
clust2	ENSG00000131470	0.937252	0.795166	0.672946	-0.318818	-0.0619941	0.0461587	-1.08233	-1.19283	-0.719591	-0.366677	0.139721	-0.102537	-1.38057	-1.30891	-0.773283	1.68805	1.52814	1.5001
clust2	ENSG00000186638	0.520117	1.24239	0.74567	-0.0318201	0.0812547	-0.0643676	-1.15438	-1.30388	-1.2672	0.00310243	-0.099626	-0.196163	-0.972504	-1.0632	-0.978096	1.4719	1.41225	1.65454
clust2	ENSG00000138092	0.811212	1.07504	0.73807	-0.273368	-0.158483	-0.0487904	-1.4693	-1.02359	-1.1518	-0.131442	0.129964	0.0359807	-0.893763	-1.01079	-1.14579	1.58595	1.34954	1.58136
clust2	ENSG00000181938	0.924266	0.993878	0.700953	-0.134448	-0.134818	-0.212006	-1.15939	-0.979905	-1.29544	-0.0805572	-0.213262	0.037773	-1.12695	-1.14118	-0.843094	1.45566	1.60926	1.59927
clust2	ENSG00000109685	0.308859	1.23288	1.21535	-0.114971	-0.1603	-0.123675	-0.957688	-1.17999	-0.960172	-0.184276	-0.331501	-0.325008	-0.941268	-1.16283	-0.963051	1.58111	1.4831	1.58343
clust2	ENSG00000184992	0.709683	0.963935	1.04913	0.306378	0.160867	0.0762823	-1.22332	-1.01652	-1.01901	-0.514404	-0.240926	-0.282636	-0.967267	-1.3107	-1.09581	1.63271	1.31792	1.45368
clust2	ENSG00000103404	1.27696	1.42265	1.8079	-0.161233	-0.406501	-0.0830187	-0.568879	-1.27215	-0.507138	-0.0251919	-0.534799	-0.514835	-1.13729	-1.03018	-1.29219	1.00803	0.84849	1.16936
clust2	ENSG00000138376	1.48241	1.12196	1.15803	-0.281995	-0.280207	-0.0701334	-0.391377	-0.653113	-0.305766	-0.158024	-0.109944	-0.155053	-1.68407	-1.58373	-1.46096	1.23463	0.973177	1.16416
clust2	ENSG00000136699	0.342223	1.44141	1.642	-0.239192	-0.217412	-0.240282	-0.847631	-1.09729	-1.01042	0.0993759	0.0692574	-0.198823	-1.14333	-1.37985	-0.992134	1.29803	1.17262	1.30145
clust2	ENSG00000172534	0.368621	1.56331	1.63942	-0.406553	-0.207876	-0.160677	-0.949945	-1.16775	-0.909895	0.0313785	-0.14433	-0.0537741	-0.923109	-1.31907	-1.07696	1.25455	1.12797	1.3347
clust2	ENSG00000110107	0.10526	1.47874	1.49975	-0.117527	-0.0877859	0.00614504	-1.06825	-0.718046	-1.04105	-0.202392	-0.170015	-0.14142	-1.24469	-1.09373	-1.23617	1.28386	1.42477	1.32257
clust2	ENSG00000176619	0.40664	1.64402	1.63791	-0.0921411	-0.116817	-0.0975249	-0.819355	-0.802492	-0.948846	-0.256041	-0.326441	-0.336034	-1.15611	-1.24943	-1.1953	1.26594	1.16604	1.27598
clust2	ENSG00000179409	0.578408	1.45799	1.47148	0.345778	0.520398	0.216198	-1.10126	-0.974582	-0.775073	-0.0990157	-0.21764	-0.0841765	-1.41556	-1.81577	-1.0045	0.956351	0.942349	0.998627
clust2	ENSG00000159259	0.770435	1.70269	1.67017	0.359041	0.0182075	0.0995133	-0.958026	-1.17487	-1.09624	-0.283322	-0.296993	-0.336829	-1.17328	-1.18088	-1.06264	1.05807	0.958885	0.926077
clust2	ENSG00000062822	0.99548	1.54954	1.60668	-0.156709	-0.0635658	0.120291	-0.91019	-0.936987	-1.0313	-0.340664	-0.123609	-0.187819	-1.21103	-1.29144	-1.22078	1.07685	1.01673	1.10853
clust2	ENSG00000164053	0.831327	1.59167	1.52399	-0.200394	-0.148722	0.0499114	-0.882165	-1.01138	-0.670059	-0.118281	-0.526628	-0.13035	-1.32381	-1.3481	-1.10742	1.20094	1.2241	1.04539
clust2	ENSG00000137561	0.908328	0.32392	0.686296	-0.633367	0.39313	-0.447992	0.208157	-0.682202	-0.979936	-0.994996	0.445905	0.923104	-1.17072	-1.33277	-1.33277	1.66201	0.117772	1.90613
clust2	ENSG00000029153	0.94963	0.426434	0.579343	-0.0716195	0.13488	-0.269355	-0.829862	-1.0409	-0.913756	0.720308	0.519873	0.672422	-1.03367	-1.64021	-1.85215	1.28442	1.21962	1.14458
clust2	ENSG00000198513	1.43868	0.509436	0.800658	-0.632444	-0.367551	0.345379	-0.927463	-1.01018	-0.708851	0.568697	0.439354	0.530351	-1.57441	-1.28866	-1.47724	0.882806	1.37602	1.09543
clust2	ENSG00000114529	0.925598	0.556844	0.642806	-0.854655	-1.07741	-1.07786	-0.114728	-0.24605	0.00968107	0.613148	0.58833	0.533748	-1.433	-1.45289	-1.47001	1.30073	1.23848	1.31724
clust2	ENSG00000168014	1.38831	0.77769	0.549112	-0.840129	-0.391984	-0.591446	0.0266418	-0.17567	-0.0487235	0.995864	0.634047	0.561949	-1.60889	-1.9926	-1.61931	0.917995	0.404029	1.01311
clust2	ENSG00000170571	1.23005	1.03921	0.961391	-0.953394	-0.913593	-0.756942	-0.287296	-0.344221	-0.191887	0.799032	0.910524	0.696426	-1.55487	-1.51156	-1.52905	0.744667	0.847183	0.81432
clust2	ENSG00000128951	2.23659	1.51256	1.5501	0.407777	0.0856478	0.181913	-1.0926	-0.564742	-1.40511	-0.763098	-0.504896	-0.385336	-0.786613	-0.459307	-1.15099	0.409546	0.505598	0.222959
clust2	ENSG00000101624	2.12863	1.05721	1.32513	0.0486371	0.121174	-0.478084	-1.09677	-0.820657	-1.24755	-0.248046	-0.506258	0.0151549	-1.12297	-0.45075	-1.32256	1.16351	0.757127	0.677069
clust2	ENSG00000132773	1.69818	1.43769	1.40137	0.0919497	0.445001	-0.0596873	-1.6444	-0.678023	-1.34366	-0.379526	-0.654083	-0.332919	-1.03903	-0.48473	-0.887471	1.10715	0.764613	0.557575
clust2	ENSG00000184635	2.22224	1.05665	1.26651	-0.407709	-0.20795	-0.234827	-1.17204	-1.18687	-1.13925	-0.400879	-0.523898	-0.490109	-0.724348	-0.458144	-0.662991	0.915614	1.04738	1.10063
clust2	ENSG00000035499	1.8406	1.06714	1.15108	-0.137162	-0.138086	-0.213031	-1.24347	-1.33931	-1.16954	-0.458554	-0.50399	-0.432344	-0.685014	-0.751955	-0.588336	1.20716	1.18162	1.21322
clust2	ENSG00000058804	1.9264	1.30443	1.25262	-0.414889	-0.382251	-0.284687	-1.12061	-1.23375	-1.10565	-0.37469	-0.18002	-0.411661	-0.678575	-0.775385	-0.79714	1.13052	1.0706	1.07474
clust2	ENSG00000000460	2.00235	1.21643	1.04389	-0.296418	-0.287491	-0.165476	-1.10048	-1.30118	-1.38535	-0.343821	-0.281281	-0.517417	-0.55637	-0.590734	-0.755421	1.25694	1.01981	1.04203
clust2	ENSG00000146918	2.03066	1.22735	1.23189	-0.145904	-0.243458	-0.163194	-1.26847	-1.25443	-1.29503	-0.363891	-0.412254	-0.380907	-0.634414	-0.644209	-0.728389	1.01849	1.02029	1.00588
clust2	ENSG00000125484	1.78152	1.13794	1.50592	-0.472165	-0.307897	-0.153661	-1.21638	-1.41916	-1.11793	-0.335365	-0.436708	-0.614612	-0.137773	-0.730154	-0.70079	1.02558	1.07154	1.12009
clust2	ENSG00000189091	1.84678	1.30611	1.25639	-0.040713	-0.0630297	0.00504245	-0.966599	-1.38025	-1.14137	-0.632148	-0.668443	-0.72089	-0.48426	-0.879487	-0.62018	1.06068	0.958287	1.16408
clust2	ENSG00000113569	2.47561	1.29421	1.22753	-0.44446	-0.356374	-0.393371	-1.03237	-1.06585	-1.04884	-0.376473	-0.184139	-0.466483	-0.667506	-0.711502	-0.721595	0.85076	0.759217	0.861634
clust2	ENSG00000196419	2.07608	1.39467	1.5521	-0.434385	-0.364768	-0.507644	-1.13915	-1.03161	-1.0825	-0.457077	-0.406699	-0.404177	-0.624489	-0.650819	-0.634739	0.948176	0.947693	0.819342
clust2	ENSG00000125871	2.07921	1.4385	1.25253	-0.414595	-0.448224	-0.554265	-0.776854	-0.910264	-1.09816	-0.445823	-0.533688	-0.773736	-0.764512	-0.690205	-0.513019	1.06656	1.04838	1.03817
clust2	ENSG00000180198	1.89947	1.50729	1.38453	-0.175665	-0.369068	-0.197685	-0.952223	-0.872701	-1.29079	-0.574973	-0.629554	-0.569658	-0.628547	-0.715813	-0.821783	0.91529	1.08179	1.01009
clust2	ENSG00000075131	1.8836	1.67342	1.63934	0.0183056	-0.253586	-0.0506481	-1.19129	-1.30194	-1.26812	-0.33673	-0.480848	-0.512432	-0.390142	-0.918369	-0.497073	0.740902	0.631934	0.613671
clust2	ENSG00000140451	1.86646	1.81018	1.67346	-0.119592	-0.238767	-0.219295	-1.13211	-1.09441	-1.21602	-0.476924	-0.641575	-0.568618	-0.665204	-0.649431	-0.373796	0.694028	0.682177	0.669447
clust2	ENSG00000130844	1.97749	1.64072	1.45563	0.0737182	0.102523	0.0338723	-1.29612	-1.33847	-1.25586	-0.345965	-0.555354	-0.420461	-0.754969	-0.693752	-0.551215	0.737221	0.607992	0.582993
clust2	ENSG00000172687	1.92033	1.72116	1.65209	-0.0727047	-0.089954	-0.0932356	-1.31538	-1.36027	-1.27891	-0.291994	-0.284591	-0.298893	-0.587258	-0.539225	-0.736143	0.524519	0.432721	0.69774
clust2	ENSG00000079387	1.84316	1.39271	1.40761	-0.147745	0.202227	-0.0444362	-1.50153	-1.48485	-1.01817	-0.373246	-0.498364	-0.620189	-0.317572	-0.469125	-0.910268	0.670742	0.970801	0.89825
clust2	ENSG00000132383	1.76687	1.5547	1.48761	-0.270672	-0.189845	-0.237601	-1.22518	-1.3218	-1.26048	-0.452642	-0.342054	-0.357939	-0.567649	-0.581445	-0.765302	0.943518	0.871035	0.948884
clust2	ENSG00000158402	1.31228	1.54263	1.57831	0.00717467	0.0235698	-0.0166767	-1.30493	-1.25378	-1.33304	-0.429842	-0.684635	-0.498191	-0.47488	-0.617664	-0.881731	1.0368	1.04267	0.951931
clust2	ENSG00000144580	1.79782	1.48214	1.61689	-0.424047	-0.741962	-0.662626	-1.22651	-1.42548	-1.26736	-0.396972	-0.322804	0.0520612	-0.31697	-0.398321	-0.229989	0.707802	0.766369	0.989968
clust2	ENSG00000160352	1.6991	1.34656	1.52513	-0.475901	-0.457521	-0.40572	-1.38922	-1.54305	-1.29364	0.0021013	-0.109206	-0.11281	-0.530822	-0.449046	-0.569431	0.912735	0.85142	0.999314
clust2	ENSG00000060688	1.98952	1.56615	1.44941	-0.660407	-0.581097	-0.425101	-1.02967	-1.17637	-1.19221	-0.362182	-0.384894	-0.619695	-0.391294	-0.359297	-0.520733	0.828777	1.02911	0.839985
clust2	ENSG00000196290	1.96281	1.52767	1.37878	-0.69613	-0.453666	-0.592578	-0.983459	-1.28846	-0.772005	-0.802963	-0.40695	-0.755931	-0.389794	-0.373576	-0.296092	0.985323	0.957217	0.999812
clust2	ENSG00000162775	1.9458	1.37258	1.45072	-0.471487	-0.700612	-0.493539	-1.2673	-1.53231	-0.955592	-0.181886	-0.680166	-0.531639	0.149893	-0.34408	-0.394364	0.881705	0.792498	0.959792
clust2	ENSG00000173085	1.85853	1.4261	1.48591	-0.112186	-0.539997	-0.378938	-1.39441	-1.42176	-1.15453	-0.385641	-0.327039	-0.83632	-0.274753	-0.0427079	-0.496371	0.739486	1.00553	0.849101
clust2	ENSG00000166439	1.89125	1.07162	1.12131	0.453488	0.311252	0.16506	-1.30243	-1.84676	-0.825693	-0.201449	-1.13493	-0.677799	-0.382539	-0.682097	-0.161554	0.927353	0.00374401	1.27017
clust2	ENSG00000097046	2.16821	1.06759	0.925063	0.37405	0.382348	0.281937	-1.60879	-1.65582	-1.28711	-0.304528	-0.454305	-0.401861	-0.443863	-0.607316	-0.600213	0.742008	0.742939	0.679656
clust2	ENSG00000173226	1.91544	1.58231	1.27274	0.374412	0.309599	0.179468	-1.79162	-1.33234	-1.23484	-0.0675984	-0.355324	-0.632468	-0.517178	-0.510396	-0.736724	0.471279	0.658638	0.414614
clust2	ENSG00000187772	2.25203	1.29796	1.45561	0.22098	0.254947	0.326461	-1.35476	-1.42572	-1.37719	-0.141801	-0.320857	-0.358242	-0.59417	-0.787408	-0.650136	0.35462	0.362079	0.485593
clust2	ENSG00000107951	2.52152	1.14477	1.20048	-0.0709756	0.176135	0.0448407	-1.1069	-1.22903	-1.09632	-0.43213	-0.544856	-1.07581	-0.457833	-0.482015	-0.648929	0.680768	0.684918	0.691372
clust2	ENSG00000163807	2.69195	1.11545	1.45156	-0.0761869	0.0881072	-0.116599	-1.03641	-1.495	-1.29872	-0.198323	-0.533503	-0.473776	-0.361668	-0.301484	-0.484928	0.400773	0.226109	0.402653
clust2	ENSG00000272602	2.73592	1.19544	1.27304	-0.0130479	0.107441	0.0768701	-1.05266	-1.50332	-1.1121	-0.324482	-0.650956	-0.675396	-0.330476	-0.180675	-0.590798	0.329448	0.328001	0.38775
clust2	ENSG00000112081	1.99613	0.845226	0.924399	-0.1472	-0.26537	-0.245808	-0.681231	-1.00572	-0.801795	-0.546478	-0.396825	-0.534097	-0.920147	-1.02741	-1.14291	1.28235	1.44568	1.2212
clust2	ENSG00000137822	1.95903	1.29077	1.3353	-0.33083	-0.650555	-0.0881616	-0.458427	-0.83481	-0.911268	-0.441421	-0.538671	-0.480331	-0.933504	-1.09623	-1.06449	1.01802	1.10331	1.12227
clust2	ENSG00000130713	2.04222	1.1878	0.951632	-0.354391	-0.499545	-0.465935	-0.58805	-0.630472	-0.734894	-0.399639	-0.554458	-0.362172	-1.09058	-1.05659	-1.11193	1.24226	1.12891	1.29583
clust2	ENSG00000131876	2.10845	1.11245	1.02728	-0.269726	-0.61185	-0.289372	-0.75913	-0.817508	-0.971584	-0.351088	-0.411454	-0.429135	-1.16413	-0.964811	-0.759002	1.17152	1.20968	1.16942
clust2	ENSG00000093000	2.1895	0.834171	0.841581	-0.395936	-0.446162	-0.47402	-0.824404	-0.96409	-0.791652	-0.388751	-0.705692	-0.561954	-0.829743	-0.746308	-0.710578	1.33892	1.26411	1.37101
clust2	ENSG00000128050	2.46083	0.925374	0.884807	-0.53014	-0.598155	-0.534976	-0.749017	-0.774864	-0.6847	-0.6809	-0.668418	-0.610706	-0.615822	-0.653187	-0.704143	1.14734	1.18254	1.20413
clust2	ENSG00000106344	2.18088	1.23727	1.17678	-0.5082	-0.813178	-0.864512	-0.735157	-0.973821	-0.677748	-0.351505	-0.580583	-0.44923	-0.428285	-0.739713	-0.788392	1.17291	0.953707	1.18878
clust2	ENSG00000125450	1.80153	1.07273	0.9762	-0.384287	-0.628876	-0.746347	-0.951145	-0.953481	-0.777021	-0.468445	-0.346252	-0.295809	-0.780204	-0.72124	-0.926845	1.24968	1.36965	1.51017
clust2	ENSG00000171824	2.05104	0.936448	1.08601	-0.205833	-0.553002	-0.784337	-0.880286	-0.949739	-0.919436	-0.294754	-0.47604	-0.608113	-0.490209	-0.975466	-0.739939	1.24796	1.2258	1.3299
clust2	ENSG00000180855	2.52461	0.937658	0.703118	-0.244552	-0.347689	-0.810452	-0.888922	-1.03998	-1.15721	-0.0878841	-0.59622	-0.451361	-0.301895	-0.58664	-0.808129	1.37248	0.696976	1.08609
clust2	ENSG00000155561	2.37897	1.02154	0.986641	-0.463046	-0.460339	-0.406879	-1.01125	-1.01107	-1.12663	0.243037	0.0325022	0.0556407	-0.85881	-1.11839	-0.962	0.891338	0.832948	0.975787
clust2	ENSG00000167721	2.62134	1.13922	1.20451	-0.247849	-0.436706	-0.565286	-0.845045	-0.878284	-0.711503	-0.198799	-0.258322	-0.190999	-0.810838	-1.14573	-0.962018	0.770249	0.624545	0.891512
clust2	ENSG00000175322	2.10005	1.27524	0.995072	-0.378939	-0.358144	-0.342754	-0.983635	-1.10374	-1.17168	-0.163293	-0.408617	-0.348922	-0.868538	-0.842535	-0.722747	1.18314	0.94008	1.19996
clust2	ENSG00000114491	2.10256	1.21045	1.25966	-0.504182	-0.429905	-0.478759	-0.871194	-0.947039	-0.812702	-0.208278	-0.480443	-0.318587	-0.921482	-0.910921	-0.955682	1.1977	1.0472	1.0216
clust2	ENSG00000145907	2.18911	0.911476	1.12598	-0.391628	-0.360432	-0.365064	-0.989725	-1.30071	-0.89643	-0.189975	-0.268773	-0.353258	-0.781517	-0.858502	-0.876675	1.13937	1.11207	1.15469
clust2	ENSG00000149554	1.98074	1.0128	1.11774	-0.426947	-0.29683	-0.410177	-0.83904	-1.15635	-0.866682	-0.31778	-0.272525	-0.468394	-0.823465	-0.765573	-1.16379	1.27149	1.19123	1.23355
clust2	ENSG00000183850	2.53029	0.837315	0.984656	-0.460099	-0.276884	-0.353739	-0.899225	-1.24494	-1.07171	-0.114816	-0.329588	-0.404055	-0.345173	-0.892547	-0.928749	0.949923	1.03993	0.979411
clust2	ENSG00000253729	2.21939	1.07524	1.20519	-0.608364	-0.558832	-0.453951	-0.829609	-1.23666	-0.816517	-0.0269186	-0.23582	-0.315431	-0.687696	-1.04148	-0.822767	0.954825	1.00037	1.17904
clust2	ENSG00000188818	2.27371	1.37704	0.810009	0.75615	-0.380832	-0.663822	-0.853878	-0.585566	-0.926799	-0.549683	-0.253122	0.277444	-1.02217	-1.40229	-0.98764	0.411301	0.624522	1.09563
clust2	ENSG00000096063	2.21774	1.30102	1.22452	-0.37975	-0.54914	-0.307598	-0.305666	-0.682349	-0.283623	-0.522205	-0.58552	-0.666764	-1.1893	-1.32158	-0.839064	0.930342	0.991281	0.967654
clust2	ENSG00000142864	2.62933	1.16427	1.25431	-0.301646	-0.235482	-0.280315	-0.42969	-0.696017	-0.338363	-0.765104	-0.668141	-0.715255	-0.921179	-1.0227	-0.972822	0.718396	0.787562	0.792854
clust2	ENSG00000054654	2.2559	1.26558	1.24451	0.122706	0.115013	-0.00420787	-0.465289	-0.865281	-0.533385	-0.446896	-0.511974	-0.479111	-1.24779	-1.41585	-1.246	0.707821	0.602985	0.901276
clust2	ENSG00000082516	2.05828	1.19232	1.35105	-0.163257	-0.239339	-0.357909	-0.615166	-0.805628	-0.441324	-0.309558	-0.481536	-0.36264	-1.00032	-1.54631	-1.18378	0.896	0.937842	1.07128
clust2	ENSG00000134940	1.99927	0.126143	1.01836	-0.794732	0.184903	0.143058	-1.31188	-0.830805	-0.966542	0.0399129	-0.264494	0.470518	-1.15256	-0.884931	-1.13916	1.26717	0.592794	1.50298
clust2	ENSG00000163918	1.69275	1.23619	0.994418	0.0102221	-0.339666	-0.0695127	-1.2451	-0.659285	-1.38964	-0.249147	-0.183354	-0.0255517	-1.24891	-0.979212	-0.984663	1.14609	1.30696	0.987423
clust2	ENSG00000116830	1.88717	1.2361	1.09889	0.157619	-0.140501	-0.0798468	-0.825387	-1.05499	-0.911471	-0.342597	-0.219329	-0.322419	-1.19309	-1.32072	-1.11897	1.10205	0.907193	1.1403
clust2	ENSG00000094804	1.54287	1.31128	1.22897	-0.106321	-0.0111906	-0.075699	-0.986215	-0.973984	-0.960868	-0.0971282	-0.0778807	0.00674367	-1.41457	-1.26102	-1.27176	1.08662	1.0528	1.00737
clust2	ENSG00000144354	1.81064	1.44276	1.39565	-0.108778	0.045009	0.0884222	-1.05549	-1.10958	-0.996782	-0.379887	-0.0986306	-0.209422	-1.13694	-1.11558	-1.16429	0.867474	0.860713	0.864719
clust2	ENSG00000143476	1.42234	1.17529	1.11228	0.121478	0.109896	0.104915	-1.31047	-1.33927	-1.19861	-0.0603626	-0.0343876	-0.0381799	-1.06943	-1.18438	-1.10057	1.13391	1.07141	1.08414
clust2	ENSG00000187741	1.22907	1.06772	0.980277	0.227032	0.257068	0.170305	-1.27243	-1.40902	-1.19323	-0.0183782	-0.0438754	-0.0425303	-1.11317	-1.29816	-1.05507	1.29047	0.981996	1.24192
clust2	ENSG00000065328	1.65657	0.836221	0.902211	-0.0824341	-0.0357333	-0.0856251	-1.25466	-1.29661	-1.23613	-0.0171615	0.0642772	-0.0459783	-1.00257	-1.0241	-1.11183	1.23688	1.23151	1.26516
clust2	ENSG00000149636	1.69805	1.01244	0.798703	0.0167963	0.250522	0.197387	-1.16068	-1.21811	-1.28698	-0.264458	0.0328865	-0.0290758	-1.23982	-1.1497	-1.04799	1.12574	1.17946	1.08482
clust2	ENSG00000129810	1.15952	0.953253	1.25953	0.047113	0.235165	0.241341	-1.39795	-1.1688	-1.4116	-0.285554	-0.19029	-0.567131	-0.724243	-0.895895	-1.06247	1.23819	1.30913	1.26069
clust2	ENSG00000228716	1.66253	1.13479	1.16944	0.0923606	0.287575	0.0861777	-1.52706	-1.5162	-1.27744	-0.219322	-0.219259	-0.356885	-0.75594	-0.731735	-0.880184	1.08748	1.02437	0.939292
clust2	ENSG00000076382	1.59702	1.16069	1.02328	0.0744589	-0.0382147	-0.0318996	-1.4142	-1.43117	-1.50664	-0.291158	-0.235135	-0.281053	-0.54797	-0.823222	-0.722801	1.17253	1.14028	1.1552
clust2	ENSG00000184661	1.45309	0.955991	0.986772	-0.0365302	0.0270971	0.0185719	-1.43071	-1.53043	-1.47482	-0.0226483	-0.0574048	-0.18923	-0.804239	-0.758331	-0.814463	1.20567	1.21039	1.26124
clust2	ENSG00000076003	2.35089	1.0548	0.932426	0.244858	0.310559	0.327921	-1.03716	-1.31961	-0.936743	-0.0647849	-0.0979753	-0.031564	-1.19356	-1.22043	-1.1952	0.619686	0.665799	0.590075
clust2	ENSG00000198056	1.98547	1.33837	1.39157	0.0801565	0.210045	0.457461	-1.35817	-1.44946	-1.00954	-0.330248	-0.125857	-0.143268	-1.08755	-1.02404	-0.765991	0.69399	0.484806	0.652243
clust2	ENSG00000085840	1.82084	1.52698	1.63497	-0.22605	-0.186944	-0.139887	-1.28133	-1.24114	-1.15958	-0.138836	-0.20766	-0.202454	-0.868454	-0.835735	-0.821915	0.852011	0.766547	0.708644
clust2	ENSG00000120253	2.00624	1.50669	1.46946	-0.175921	-0.111806	-0.287963	-1.02616	-1.2844	-1.01223	-0.290233	-0.0459144	-0.0480631	-0.996731	-1.16899	-0.76193	0.747139	0.676991	0.803834
clust2	ENSG00000119969	2.30656	1.40798	1.38089	-0.0844221	-0.0588803	-0.0647462	-1.18415	-1.17266	-1.18164	-0.271654	-0.173976	-0.254462	-0.803856	-0.783835	-0.975128	0.657737	0.63808	0.618161
clust2	ENSG00000136527	2.11226	1.30355	1.21792	-0.0354468	0.00954121	-0.0620283	-1.16084	-1.17439	-1.15544	-0.111566	-0.224874	-0.252535	-0.972656	-0.96777	-1.06118	0.818717	0.926945	0.789794
clust2	ENSG00000196584	2.12804	1.23201	1.20906	-0.133457	-0.0875453	-0.195237	-1.13532	-1.21561	-1.13696	-0.0705376	-0.172179	-0.0738378	-0.937445	-1.09693	-0.953381	0.900589	0.782486	0.956252
clust2	ENSG00000136982	2.10935	1.39144	1.3208	-0.159633	-0.263179	-0.229252	-1.10596	-1.27711	-1.35351	-0.154492	-0.138032	-0.238222	-0.751163	-0.932705	-0.686521	0.844714	0.808351	0.815124
clust2	ENSG00000144554	1.95282	1.26292	1.08013	-0.159174	-0.25313	-0.205297	-1.27208	-1.10909	-1.37396	-0.0197361	-0.0824802	-0.223505	-0.844128	-0.973431	-0.842686	1.01896	0.983827	1.06004
clust2	ENSG00000151503	1.93305	1.20894	1.16956	-0.289896	-0.119902	-0.0800069	-1.2934	-1.47873	-1.33643	-0.0832338	-0.151531	-0.122511	-0.62297	-0.931456	-0.722347	0.988493	0.874012	1.05836
clust2	ENSG00000104738	1.74703	1.32341	1.35173	0.0391943	0.101767	0.0433447	-1.27442	-1.42278	-1.24368	-0.141066	-0.12378	-0.15728	-0.893433	-1.00045	-0.989177	0.871489	0.895147	0.872948
clust2	ENSG00000101003	1.73147	1.23056	1.24449	0.0175902	-0.0892271	-0.0694193	-1.17452	-1.27915	-1.27673	-0.158417	-0.160472	-0.291736	-1.08559	-0.849909	-0.949808	0.975751	1.12176	1.06336
clust2	ENSG00000165480	1.65471	1.38476	1.36865	-0.118839	-0.112172	-0.183977	-1.23326	-1.2888	-1.41922	-0.303648	-0.172167	-0.204857	-0.819186	-0.871857	-0.725292	0.975123	1.03833	1.03171
clust2	ENSG00000196172	2.32284	1.04378	0.899737	0.136123	-0.118458	0.0215638	-1.08268	-1.32281	-1.60632	-0.515389	-0.244952	-0.0255377	-0.616231	-0.815052	-0.672808	0.792518	1.11677	0.686905
clust2	ENSG00000213793	2.34471	1.20792	0.833621	0.379866	0.095554	-0.200955	-1.13783	-1.40592	-0.895668	-0.561155	-0.197914	-0.118301	-1.00784	-1.0832	-0.708554	0.875472	0.731252	0.848944
clust2	ENSG00000285053	1.58517	0.765149	0.832516	0.402653	-0.195775	-1.05712	-1.02448	-1.34182	-1.27244	0.195875	-1.13	-0.174822	-0.051607	0.514597	-0.891768	1.52834	-0.294045	1.60958
clust2	ENSG00000265590	2.51466	0.751896	1.44821	-0.667679	-0.0524227	-0.369739	-0.553976	-0.953512	-0.531534	-0.683988	-0.562825	0.0632444	-0.953512	-0.602772	-0.400491	0.839224	-0.814649	1.52986
clust2	ENSG00000277157	1.50729	1.68593	1.58887	-0.792361	-0.792361	-0.792361	-0.792361	-0.792361	0.210836	-0.792361	-0.792361	-0.792361	0.128381	-0.792361	-0.263935	0.888614	-0.264177	1.64945
clust2	ENSG00000174500	2.32736	0.670562	0.277006	-0.975184	-0.90442	-1.00703	-0.367782	-0.189606	-0.0332758	0.298137	0.254998	0.354565	-1.26405	-1.32022	-1.15795	1.2068	0.983487	0.846609
clust2	ENSG00000106086	2.33663	0.950981	0.940752	-0.807819	-0.950483	-1.17897	0.202611	-0.483988	0.216957	0.229896	-0.11977	0.185777	-1.1718	-1.30889	-1.27285	0.778693	0.644343	0.807924
clust2	ENSG00000107105	2.19995	0.902897	1.08202	-0.717718	-0.959299	-0.609525	-0.0406738	-0.293373	0.10247	0.465254	0.247871	0.0785618	-1.37972	-1.5194	-1.55812	0.751381	0.658739	0.588697
clust2	ENSG00000198429	2.63861	0.555502	0.873954	-0.544249	-1.24728	-1.39846	0.113491	-0.428529	-0.0545497	0.524259	-0.448034	0.2735	-1.00502	-0.84597	-1.05795	0.584959	0.462244	1.00352
clust2	ENSG00000176406	1.84819	0.591632	0.972326	-1.23842	-1.56325	-1.31015	-0.308206	-0.449044	0.402587	0.446705	0.22436	0.0648205	-0.905036	-1.12124	-0.750191	0.953607	0.92744	1.21386
clust2	ENSG00000173041	2.16707	0.822632	1.0796	-1.05823	-1.05823	-1.05823	-0.526244	-0.381358	-0.466926	0.312329	0.192685	0.198205	-1.05823	-1.05823	-1.05823	0.861592	1.01154	1.07823
clust2	ENSG00000041802	1.94265	1.30327	1.39148	-0.918716	-1.16103	-0.8982	-0.561156	-0.570557	-0.270643	0.164197	-0.196774	0.0142043	-1.0945	-0.746472	-1.18279	0.898887	0.753148	1.133
clust2	ENSG00000092847	1.93389	1.30387	1.27521	-1.03509	-1.06434	-0.950188	-0.228172	-0.429287	-0.1565	0.0631422	-0.217319	-0.0401513	-1.0366	-1.26144	-1.02326	0.969252	0.773042	1.12393
clust2	ENSG00000117707	2.20058	0.330139	0.345	-0.903444	-0.860983	-0.824861	-0.527931	-0.530485	-0.300225	-0.0136002	-0.472226	-0.113701	-0.941751	-0.910369	-0.758427	1.07348	1.27752	1.93129
clust2	ENSG00000182010	2.58306	0.550764	0.438991	-0.32341	-0.717729	-0.726159	-0.398968	-0.810898	-0.543889	-0.235796	-0.312972	-0.367289	-0.853078	-1.11728	-0.860962	1.15996	1.21258	1.32309
clust2	ENSG00000111845	2.53286	0.30192	-0.0389197	-0.644896	-0.956595	-0.955076	-0.3435	-0.705819	-0.195313	-0.160172	-0.613932	-0.334164	-0.563693	-0.500553	-0.931943	1.2951	1.35784	1.45686
clust2	ENSG00000165732	2.80871	0.0678479	0.258922	-0.737382	-0.69385	-0.777523	-0.418415	-0.808705	-0.298181	-0.320981	-0.441831	-0.384857	-0.603248	-0.731965	-0.669662	1.26932	1.18394	1.29786
clust2	ENSG00000198924	1.86941	0.568397	0.721988	-0.901928	-0.933186	-0.494585	-0.734106	-1.04219	-0.540497	-0.0628665	0.714325	-0.0422931	-1.12545	-0.724169	-1.1655	1.32786	1.50274	1.06205
clust2	ENSG00000101811	1.63356	1.02166	0.709148	-0.745112	-0.605963	-0.814794	-0.642883	-0.692956	-0.509459	-0.131151	0.0116269	-0.307122	-0.758328	-1.51994	-0.94022	1.40294	1.33695	1.55205
clust2	ENSG00000101871	1.39248	0.528087	0.624714	-0.896288	-0.842369	-0.992191	-0.200977	-0.518476	-0.300633	-0.0650082	-0.21833	-0.39239	-1.03975	-1.13988	-0.875883	1.68452	1.53989	1.71247
clust2	ENSG00000183715	2.75196	0.883874	0.344059	-0.661791	-0.859258	-0.859258	0.0770904	-0.37993	0.521482	-0.672959	-0.79867	-0.451578	-0.859258	-0.859258	-0.859258	0.729337	1.32369	0.629731
clust2	ENSG00000056291	2.61188	0.88659	1.18646	-0.808566	-0.655854	-0.852155	-0.127686	-0.291715	-0.0881389	-0.610036	-0.437258	-0.516327	-1.00425	-0.921787	-1.00425	0.685547	1.00542	0.942127
clust2	ENSG00000143469	2.73942	1.09254	0.982087	-0.734955	-0.772816	-0.7719	0.0186451	-0.502002	0.0127547	-0.198254	-0.45495	-0.455979	-1.06212	-1.08846	-0.984404	0.827013	0.765605	0.587764
clust2	ENSG00000105889	2.5526	1.37922	0.690582	-0.799957	-0.723549	-0.762769	-0.29259	-0.325175	-0.143907	-0.631967	-0.734002	-0.703105	-0.799957	-0.799957	-0.764731	0.747135	1.23186	0.880257
clust2	ENSG00000145220	2.49884	1.05171	1.02057	-0.308719	-0.663472	-0.584238	-0.45545	-0.392836	-0.555417	-0.503993	-0.83191	-0.513013	-1.22141	-0.909765	-0.662631	0.915329	1.14707	0.969332
clust2	ENSG00000151465	2.68407	1.05863	1.00753	-0.911827	-1.10233	-1.01449	-0.571655	-0.0459508	-0.303147	-0.513471	-0.513476	-0.492315	-0.776502	-0.574514	-0.492532	0.862814	0.972211	0.726954
clust2	ENSG00000104177	2.44104	1.19334	1.16745	-1.1505	-1.23015	-1.29584	-0.198254	-0.429379	-0.0508002	-0.279404	-0.471011	-0.38166	-0.496453	-0.509196	-0.750459	0.83152	0.876953	0.732806
clust2	ENSG00000170606	2.52514	1.0546	1.09438	-1.19525	-1.10594	-1.03964	-0.309316	-0.560944	-0.240946	-0.39036	-0.242481	-0.329611	-0.550476	-0.701229	-0.728572	0.913576	0.896313	0.910746
clust2	ENSG00000064102	2.57763	0.697466	0.91374	-1.43411	-1.07433	-1.28993	-0.551966	-0.563301	-0.201408	-0.258058	-0.486125	-0.733495	0.0920586	-0.105767	-0.312696	1.0917	0.866655	0.771931
clust2	ENSG00000115421	2.71877	0.91266	0.825124	-1.11989	-0.932821	-1.0512	-0.588096	-0.807727	-0.454091	-0.514297	-0.293401	-0.619047	0.17548	-0.72463	-0.172238	0.808463	0.93499	0.901947
clust2	ENSG00000275713	2.29593	1.52394	0.877376	-0.718872	-0.93274	-0.476363	-0.774818	-1.30794	-0.319559	-0.656375	-0.908626	-0.168439	-0.0273954	-0.263487	-0.86333	0.76123	1.0508	0.908681
clust2	ENSG00000215251	2.65305	1.06627	0.857036	-1.05671	-0.9528	-0.617237	-0.503978	-0.664407	-0.578464	-0.382093	-0.519239	-0.769425	-0.513836	-0.624041	-0.293817	1.10667	0.703107	1.08992
clust2	ENSG00000146386	2.40147	1.04124	1.32013	-0.88742	-1.12449	-0.601907	-0.775745	-0.465146	-0.746735	-0.856216	-0.356073	-0.157318	-0.549817	-0.469675	-0.644022	0.891844	1.12838	0.851507
clust2	ENSG00000108559	2.67444	1.00986	0.778165	-0.666723	-0.592317	-0.946878	-1.03729	-0.911166	-0.81123	-0.486682	-0.120278	-0.474788	-0.231718	-0.503118	-0.592423	0.949786	1.02447	0.937889
clust2	ENSG00000197472	2.57001	1.10832	1.13941	-0.672142	-0.269998	-0.508282	-0.92328	-0.882812	-0.755462	-0.685865	-0.448736	-0.556471	-0.733841	-0.650341	-0.52866	0.890141	1.10875	0.799262
clust2	ENSG00000277462	2.5538	1.2536	1.10526	-0.553907	-0.630136	-0.759508	-0.780211	-0.877167	-0.658005	-0.725643	-0.631116	-0.306021	-0.456382	-0.780416	-0.481053	0.76881	0.884847	1.07325
clust2	ENSG00000112242	1.42096	1.22589	1.50697	-1.33058	-1.54644	-1.47302	-0.42487	-0.811267	-0.468272	-0.0532075	-0.145143	-0.0601459	-0.291291	-0.437631	-0.306863	1.04287	0.986153	1.16589
clust2	ENSG00000121210	2.08196	1.06748	1.61703	-1.54342	-1.14236	-1.31809	-0.726364	-0.797425	-0.411309	-0.271668	-0.220718	-0.315834	-0.132388	-0.391399	0.319963	0.908803	0.54061	0.735124
clust2	ENSG00000277791	1.95417	1.45886	1.30292	-1.0567	-1.30399	-1.26352	-0.674856	-0.590203	-0.895792	-0.33215	-0.538151	-0.287634	-0.250822	0.0198766	-0.331182	0.989637	1.10158	0.697961
clust2	ENSG00000156502	1.86213	1.77135	1.60346	-0.949691	-1.20375	-0.981121	-0.665647	-0.601131	-0.779828	-0.455607	-0.454513	-0.67747	0.0219025	-0.360366	-0.441781	0.818617	0.508337	0.985103
clust2	ENSG00000162702	2.08965	1.44727	1.57331	-1.22448	-1.16294	-1.15375	-0.450755	-0.94193	-0.501545	-0.516675	-0.450868	-0.479322	-0.0979306	-0.179936	-0.233485	0.796419	0.709389	0.777568
clust2	ENSG00000165506	2.03122	1.45481	1.46021	-1.31793	-0.998232	-1.50051	-0.313841	-0.452236	-0.225056	-0.821352	-0.623431	-0.523167	-0.462567	0.174796	-0.110501	0.72541	0.889646	0.612729
clust2	ENSG00000159131	2.18344	1.77616	1.63359	-1.00502	-0.928748	-0.877155	-0.42968	-0.604056	-0.34341	-0.597775	-0.633764	-0.698756	-0.461472	-0.521859	-0.394343	0.588252	0.629312	0.685286
clust2	ENSG00000197147	2.0469	1.57482	1.67904	-1.10674	-1.07825	-1.14685	-0.243979	-0.204981	-0.243617	-0.618747	-0.561932	-0.697856	-0.531118	-0.4768	-0.583639	0.663167	0.749699	0.780891
clust2	ENSG00000111669	1.87505	1.85232	1.72345	-0.860255	-1.19291	-0.983004	-0.714986	-0.280474	-0.70832	-0.51493	-0.545147	-0.340174	-0.53774	-0.325818	-0.534517	0.712878	0.845167	0.529402
clust2	ENSG00000137692	2.01389	1.5629	1.58995	-1.01515	-1.20574	-1.19583	-0.67067	-0.190391	-0.458219	-0.732737	-0.595227	-0.524043	-0.246637	-0.177231	-0.475025	0.921447	0.861103	0.537612
clust2	ENSG00000124614	1.75706	1.04854	1.72915	-0.0589661	-1.41494	-1.0683	-0.264632	-0.871767	-0.159227	-0.927453	-0.741316	0.238594	-0.482903	-0.768862	-0.884434	1.00269	0.943103	0.923668
clust2	ENSG00000138757	2.63178	1.15343	1.29705	-1.12516	-1.13443	-1.1839	-0.382168	-0.838096	-0.42588	0.0651566	-0.201449	-0.219657	-0.222892	-0.692199	-0.554206	0.554227	0.531292	0.747097
clust2	ENSG00000101452	1.99614	1.66963	1.30196	-1.10756	-1.43236	-1.1725	-0.390407	-0.814857	-0.170134	-0.19316	-0.0752811	-0.00242382	-0.651001	-0.629968	-0.624175	0.772539	0.653302	0.87025
clust2	ENSG00000157193	2.01535	1.73487	1.69773	-1.00246	-1.05395	-1.10758	-0.379416	-0.603433	-0.360601	-0.310908	-0.26803	-0.311682	-0.701438	-0.640749	-0.703496	0.654622	0.477372	0.863791
clust2	ENSG00000156735	2.0165	1.69111	1.62417	-0.559143	-0.974784	-1.05948	-0.628725	-1.07531	-0.818745	0.217299	0.191537	0.00615545	-0.732338	-0.531288	-0.990266	0.331107	0.668777	0.623423
clust2	ENSG00000124831	2.32293	1.33624	1.33219	-0.874098	-0.995735	-0.865469	-0.592411	-0.812402	-0.400175	0.321674	0.151996	0.359899	-1.06602	-0.873039	-1.09126	0.639858	0.52394	0.581883
clust2	ENSG00000140022	2.47813	1.52021	1.4437	-0.844353	-0.911966	-0.813528	-0.319213	-0.432855	-0.465664	-0.0969194	-0.0982046	-0.0461105	-0.967545	-0.993858	-1.00174	0.501946	0.550415	0.497554
clust2	ENSG00000186310	2.3535	1.31222	1.16433	-0.576977	-0.12369	-0.37674	-0.43178	-0.437557	-0.395225	0.184015	0.13174	0.0431527	-1.55474	-1.19755	-1.63247	0.542789	0.50756	0.487433
clust2	ENSG00000166257	2.2584	0.981453	1.81138	-0.816932	-0.207513	-0.836639	-0.53724	-1.03449	-0.619732	0.137298	0.200731	0.619311	-0.888802	-1.27571	-1.04789	0.335938	0.520887	0.399546
clust2	ENSG00000102043	2.26112	1.44629	2.00811	-0.599961	-0.0336368	-0.530622	-0.797788	-0.384296	-0.498073	0.163485	0.468451	-0.0932942	-1.09554	-1.15572	-1.09045	0.207613	-0.25455	-0.0211391
clust2	ENSG00000121236	2.0096	1.63891	1.89049	-0.649941	-0.371703	-0.672923	-0.612078	-0.502133	-0.523112	0.337959	0.459442	0.212526	-1.23667	-1.03988	-1.30407	0.320953	0.0531519	-0.0105246
clust2	ENSG00000272398	1.70916	1.76673	1.78632	-0.4328	-0.401174	-0.406902	-0.63722	-0.706817	-0.624322	0.347293	0.37196	0.378922	-1.33104	-1.35032	-1.31221	0.273194	0.307849	0.26137
clust2	ENSG00000163568	2.41489	1.11048	0.662353	-0.658016	-0.787168	-0.642633	-0.555217	-0.703445	-0.900171	1.08701	0.784841	0.331655	-1.30425	-1.30425	-0.676417	0.481065	0.646994	0.0122919
clust2	ENSG00000072736	1.71241	1.41519	1.72324	-0.378255	-0.507615	-0.251166	-0.861292	-1.78512	-0.833367	0.623856	0.474812	0.277092	-0.756351	-1.19979	-0.833098	0.233436	0.239012	0.707004
clust2	ENSG00000113360	1.41838	1.53053	1.52968	-0.6508	-0.380213	-0.530026	-0.992413	-1.33613	-1.24901	0.499699	0.540362	0.416648	-1.01914	-1.00386	-0.914407	0.736587	0.687845	0.716273
clust2	ENSG00000177675	2.55102	1.45783	0.795862	-1.03783	-0.0521042	-1.03783	-1.03783	-0.171911	-0.118323	0.268847	-0.607244	0.407699	-1.03783	-1.03783	-0.807716	0.0219899	0.734371	0.70883
clust2	ENSG00000103037	2.88409	1.43297	1.28379	-0.148583	-0.344566	-0.523027	-0.106904	0.0692933	-0.179407	-0.262167	-0.465102	0.112056	-1.37802	-0.987385	-1.14986	-0.122224	-0.0219709	-0.0929847
clust2	ENSG00000008086	2.63074	1.50047	1.68323	-0.523091	-0.606011	-0.78911	0.0793734	-0.632732	0.161581	0.0830546	-0.279792	-0.0770149	-0.855072	-1.09832	-1.11586	-0.151907	0.0216131	-0.0311488
clust2	ENSG00000023171	2.22175	1.7337	1.95369	-0.370574	-0.565025	-0.566789	-0.331184	-0.307345	-0.129573	-0.108855	-0.448578	0.00317991	-0.958664	-1.17074	-1.25784	-0.0781415	-0.00806962	0.389063
clust2	ENSG00000187672	2.32063	1.92137	1.65071	-0.763492	-0.6052	-0.564707	-0.186901	-0.55964	-0.213261	-0.246103	-0.118599	-0.195575	-1.02277	-1.025	-1.04923	0.146154	0.0636904	0.447931
clust2	ENSG00000198763	2.50511	1.41871	1.5552	-1.09152	-0.964417	-0.993565	0.148857	0.32302	0.122571	-0.382842	-0.31005	-0.579642	-0.90781	-0.764411	-0.904927	0.326731	0.302275	0.19671
clust2	ENSG00000123213	2.29928	1.68723	1.73208	-0.846631	-0.977685	-0.899692	-0.0650712	-0.22684	-0.0024723	-0.429477	-0.461992	-0.428926	-0.887949	-0.83876	-0.870563	0.439225	0.364851	0.413384
clust2	ENSG00000152932	2.57539	1.62213	1.48985	-0.853662	-0.82844	-0.852595	-0.154315	-0.0478228	-0.0336937	-0.230071	-0.332082	-0.615903	-0.897035	-0.897035	-0.897035	0.133756	0.546621	0.27194
clust2	ENSG00000067715	2.92899	1.24186	1.19001	-0.89197	-0.863772	-0.854681	-0.0179311	-0.195245	-0.147315	-0.148796	-0.24172	-0.355655	-0.919725	-0.883349	-0.928738	0.260116	0.523813	0.304102
clust2	ENSG00000112159	2.89975	1.39372	1.43905	-0.748706	-0.73754	-0.744841	0.121867	-0.0778771	0.25302	-0.418693	-0.482008	-0.534911	-0.768058	-0.890257	-0.860798	0.0298347	0.000804489	0.125644
clust2	ENSG00000155629	2.43129	0.933675	1.49792	-1.10852	-1.10852	-1.10852	0.00852863	0.0370011	0.676315	0.15789	0.0888509	-0.16808	-1.06504	-1.06869	-1.06135	0.565851	0.118862	0.17253
clust2	ENSG00000261609	2.29054	1.34234	1.42243	-0.954406	-0.591806	-1.00027	0.421494	0.16497	0.55654	-0.0236984	-0.397318	-0.227851	-1.14303	-1.39777	-1.21814	0.201752	0.317352	0.23688
clust2	ENSG00000163376	3.26017	0.619553	1.0224	-0.567147	-0.495223	-0.549517	-0.387841	-0.634332	-0.592179	-0.176169	-0.0164699	0.0155953	-0.898092	-0.838309	-1.03458	0.319953	0.51367	0.438514
clust2	ENSG00000095002	2.97185	1.15402	1.13479	-0.302943	-0.27668	-0.304456	-0.517586	-0.639661	-0.555231	-0.443906	-0.566161	-0.521259	-0.90127	-0.845444	-1.03612	0.511962	0.604859	0.533236
clust2	ENSG00000105866	2.98619	1.18111	1.28608	-0.557196	-0.269603	-0.565254	-0.714891	-0.5677	-0.484402	-0.428137	-0.563847	-0.345385	-0.808317	-0.789159	-0.787693	0.271014	0.616495	0.540696
clust2	ENSG00000088035	2.59073	0.998133	1.28535	-0.298717	-0.0196559	-0.921922	-0.368024	-1.22105	-0.454268	-0.797594	-0.619474	-0.494121	-0.978452	-0.43548	-0.667844	1.03284	0.631185	0.738361
clust2	ENSG00000169989	2.7955	1.48196	1.06083	-0.324348	0.19103	-0.463824	-0.38761	-0.700348	-0.495549	-0.160467	-0.790187	-0.879814	-0.881389	-0.302506	-1.20363	0.933011	0.0804549	0.0468929
clust2	ENSG00000136231	1.97316	2.01834	2.04935	-0.172609	-0.333706	-0.221686	-0.318281	-0.654083	-0.105406	-0.485627	-0.730617	-0.620084	-0.938418	-1.05297	-0.930198	0.135189	0.180198	0.207445
clust2	ENSG00000143190	2.29733	1.68967	1.85196	-0.350991	-0.351316	-0.371011	-0.427732	-0.720025	-0.287676	-0.470247	-0.549169	-0.777998	-0.779402	-1.13095	-0.831605	0.58653	0.199027	0.423613
clust2	ENSG00000180182	2.27551	1.93003	1.81966	-0.401159	-0.12272	-0.230166	-0.395274	-0.746471	-0.28139	-0.696769	-0.748088	-0.858542	-0.565801	-0.998182	-0.684802	0.1504	0.175289	0.378472
clust2	ENSG00000035141	2.18895	1.7189	1.70599	-0.115566	-0.46972	-0.671209	-0.625877	-0.377993	-0.577461	-0.604025	-0.288474	-0.164009	-1.10667	-1.09171	-1.04819	0.476055	0.629732	0.421279
clust2	ENSG00000125454	2.16927	1.84703	1.75849	-0.228404	-0.38463	-0.447313	-0.214507	-0.655206	-0.68879	-0.409228	-0.0548803	-0.598785	-1.01687	-0.991324	-1.21219	0.389348	0.34236	0.39564
clust2	ENSG00000155380	2.34274	1.8353	1.86018	-0.346784	-0.338305	-0.395437	-0.523002	-0.801919	-0.553859	-0.474322	-0.489702	-0.472626	-0.863747	-0.828585	-0.828505	0.306644	0.329225	0.242703
clust2	ENSG00000184613	2.39814	1.89081	1.81709	-0.324943	-0.182098	-0.19892	-0.544968	-0.492731	-0.545161	-0.533936	-0.559393	-0.62	-0.875715	-0.848846	-0.885973	0.194632	0.0684356	0.24358
clust2	ENSG00000111879	2.64199	1.65216	1.74499	-0.388767	-0.300937	-0.45333	-0.701627	-0.513826	-0.765682	-0.442802	-0.646964	-0.532794	-0.768192	-0.527829	-0.701628	0.371078	0.201941	0.132212
clust2	ENSG00000136237	2.68163	1.63565	1.83085	-0.206191	-0.30853	-0.219297	-0.702666	-0.702844	-0.686492	-0.363296	-0.483083	-0.391544	-0.730589	-0.730589	-0.730589	0.0759904	0.088181	-0.0565931
clust2	ENSG00000170448	2.23272	2.22917	1.53807	-0.206439	-0.215898	-0.554755	-0.469732	-0.350518	-0.32045	-0.778447	-0.787275	-0.529082	-0.75713	-0.585563	-1.09107	0.443992	0.0418784	0.160524
clust2	ENSG00000198093	2.20732	1.96284	1.9066	-0.469086	-0.485595	-0.795993	-0.521875	-0.164795	-0.442194	-0.528708	-0.841812	-0.389119	-0.704007	-0.847791	-0.664705	0.453798	0.182653	0.142472
clust2	ENSG00000100410	2.42992	1.74603	1.71608	-0.57247	-0.489626	-0.615175	-0.874749	-0.319971	-0.581969	-0.72264	-0.54707	-0.308387	-0.637189	-0.628623	-0.840274	0.344809	0.471853	0.429455
clust2	ENSG00000178150	2.39129	1.71726	1.90496	-0.57438	-0.605013	-0.525186	-0.4042	-0.496449	-0.621047	-0.609721	-0.346035	-0.419112	-0.76893	-0.756071	-0.861701	0.461422	0.355267	0.157643
clust2	ENSG00000101977	2.34921	2.03005	1.28465	-0.57081	-0.740895	-0.743886	-0.507709	-0.752554	-0.747345	-0.424051	-0.514836	-0.218486	-0.521112	-0.835404	-0.663079	0.57042	0.21477	0.791067
clust2	ENSG00000135747	2.57513	1.86707	1.18959	-0.438935	-0.42243	-0.727154	-0.727154	-0.727154	-0.727154	-0.727154	-0.727154	-0.341978	-0.0981285	-0.727154	-0.727154	0.502756	0.454095	0.530064
clust2	ENSG00000102221	2.31598	1.84375	1.54771	-0.686083	-0.794006	-0.818799	-0.307454	-0.379255	-0.0950584	-0.644091	-0.578051	-0.951364	-0.676881	-0.805299	-0.499496	0.569301	0.360943	0.598155
clust2	ENSG00000243716	2.26542	2.06114	1.42959	-0.528686	-0.728688	-0.471779	-0.320131	-0.36036	-0.522535	-0.697422	-0.872469	-0.797975	-0.571769	-0.85738	-0.536724	0.516633	0.350145	0.642994
clust2	ENSG00000185344	2.15926	1.91757	1.80516	-0.748365	-0.586498	-1.06554	-0.228086	-0.641461	-0.346121	-0.370155	-0.599423	-0.684782	-0.60454	-0.772762	-0.512119	0.293308	0.396449	0.588109
clust2	ENSG00000188295	2.37419	1.69269	1.58136	-0.593323	-0.485658	-0.860984	-0.171267	-0.62212	-0.488956	-0.383031	-0.686858	-0.753163	-0.520436	-0.903536	-0.725653	0.802516	-0.0100831	0.754303
clust2	ENSG00000120756	2.82795	1.41002	1.51287	-0.726919	-0.49181	-0.722444	-0.242255	-0.485841	-0.382594	-0.506066	-0.392397	-0.376316	-0.776292	-0.859634	-0.848775	0.403317	0.336788	0.320404
clust2	ENSG00000136160	2.76401	1.42168	1.36991	-0.660995	-0.625178	-0.658593	-0.555853	-0.573296	-0.553897	-0.604233	-0.347628	-0.404789	-0.753896	-0.763538	-0.722384	0.605229	0.502347	0.561109
clust2	ENSG00000106603	2.50446	1.54374	1.43217	-0.594168	-0.814596	-0.614998	-0.35464	-0.432639	-0.276768	-0.733456	-0.726577	-0.534588	-0.489758	-0.60994	-1.16393	0.479768	0.682475	0.703442
clust2	ENSG00000163026	2.41015	1.53788	1.54012	-0.864913	-0.829995	-0.60973	-0.275667	-0.492741	-0.234133	-0.413475	-0.680041	-0.482142	-0.709466	-0.954591	-0.854665	0.553498	0.80214	0.557779
clust2	ENSG00000065427	2.06369	1.84941	1.78914	-0.725561	-0.792489	-0.888496	-0.344311	-0.276	-0.568909	-0.859321	-0.823495	-0.862165	-0.46247	-0.374352	-0.387594	0.517962	0.759087	0.385873
clust2	ENSG00000182287	2.1408	1.89185	1.87132	-0.746029	-0.747914	-0.712814	-0.262471	-0.434937	-0.398831	-0.765448	-0.785494	-1.02875	-0.500415	-0.340807	-0.404495	0.402891	0.453654	0.367886
clust2	ENSG00000117697	2.06328	1.73197	1.84816	-0.763025	-0.467178	-0.873741	-0.43778	-0.753634	-0.509483	-1.09705	-0.624026	-0.576527	-0.334567	-0.627221	-0.405961	0.480307	0.749835	0.596637
clust2	ENSG00000183150	2.30953	1.78473	1.68593	-0.568961	-0.52402	-0.653585	-0.641915	-0.791389	-0.572651	-0.790336	-0.732148	-0.595926	-0.312043	-0.499758	-0.693795	0.679186	0.559865	0.357286
clust2	ENSG00000167840	2.31913	2.00341	1.54424	-0.721309	-0.894696	-0.837954	-0.10694	-0.101924	-0.387476	-0.669544	-0.650905	-0.668017	-0.638154	-0.741738	-0.405175	0.654791	0.390059	-0.0878019
clust2	ENSG00000137571	2.06113	2.40455	1.47416	-0.738275	-0.738275	-0.738275	-0.147142	-0.388803	-0.367688	-0.338116	-0.573981	-0.668223	-0.738275	-0.738275	-0.71287	0.309124	0.500101	0.139138
clust2	ENSG00000177272	2.29481	2.36414	1.36705	-0.631691	-0.529278	-0.534008	-0.205048	-0.679246	-0.679246	-0.634405	-0.549803	-0.426829	-0.636714	-0.679246	-0.587224	0.29779	0.395789	0.0531499
clust2	ENSG00000135972	2.83358	1.47788	1.32283	-0.142824	-0.28223	-0.596784	-0.709334	-0.392972	-0.886567	-0.620625	-0.549043	0.144146	-0.719549	-0.553647	-1.10502	0.248622	0.566748	-0.0352135
clust2	ENSG00000171757	2.7008	1.72469	1.31899	-0.56569	-0.966801	-0.7145	-1.09155	-0.372108	-0.457808	-0.466732	-0.615707	-0.337902	-0.673123	-0.214938	-0.318806	0.285911	0.386213	0.379063
clust2	ENSG00000257446	2.65697	1.43618	1.81688	-0.0473931	-0.659213	-0.747088	-0.754618	-0.536904	-0.593818	-0.532228	-0.541332	-0.832716	-0.685315	-0.171256	-0.597353	0.353269	0.103471	0.332471
clust2	ENSG00000165526	2.53971	1.42077	1.71818	-0.712372	-0.433539	-0.326132	-0.559748	-0.0873467	-0.422117	-0.831239	-0.915245	-0.869121	-0.647359	-0.526972	-0.776543	0.523268	0.524964	0.38085
clust2	ENSG00000181007	3.0234	1.18285	1.49432	-0.434805	-0.16216	-0.522884	-0.143977	-0.501696	-0.554587	-0.862906	-0.766555	-0.790526	-0.495089	-0.268857	-0.853104	0.306655	0.191944	0.157976
clust2	ENSG00000008324	2.56973	1.48764	1.2629	-0.986961	-0.997787	-0.764022	0.302241	-0.129268	-0.400506	-0.797005	-0.756346	-0.547849	-0.326347	-0.604167	-0.817101	0.610103	0.864212	0.0305265
clust2	ENSG00000144410	2.56143	1.59707	1.79967	-0.716292	-0.572152	-0.576625	0.0697827	-0.589623	-0.581807	-0.587537	-0.591595	-0.476385	-0.257621	-0.716292	-0.716292	-0.358505	0.797115	-0.0843421
clust2	ENSG00000144040	0.243303	0.655795	1.25967	-1.89992	-1.51687	-1.25032	-0.637432	-0.399944	-1.18811	0.0818396	-0.155895	-0.339595	0.579722	0.199954	0.75961	1.06586	1.22095	1.32138
clust2	ENSG00000128564	0.147725	1.07966	1.35398	-1.26161	-1.18502	-1.1874	-1.16113	-1.12987	-1.05657	-0.214925	-0.171792	-0.340521	0.436624	0.326386	0.453048	1.45824	1.18966	1.2635
clust2	ENSG00000138074	0.767855	1.58275	1.56271	-1.21757	-1.05992	-0.996056	-1.02174	-1.161	-1.02594	-0.410108	-0.393827	-0.575603	0.157823	0.200787	0.305504	1.15633	1.00781	1.12018
clust2	ENSG00000141298	-0.0238105	1.27543	0.980056	-1.42009	-1.1638	-1.51012	-0.357724	-0.905374	-0.434311	0.605183	0.42078	0.184953	-0.690599	-0.78581	-0.326991	1.35955	1.17541	1.61726
clust2	ENSG00000025772	-0.0955476	1.00985	0.796982	-1.41447	-1.4994	-1.45557	-0.714562	-0.277892	-0.761129	-0.122986	-0.277656	-0.0965419	0.0697269	0.0057156	0.031798	1.53924	1.66744	1.59502
clust2	ENSG00000196935	-0.392389	0.690283	0.996689	-1.17975	-1.32442	-1.37371	-0.628112	-0.807374	-0.733831	0.106205	0.138537	-0.00181406	-0.279241	-0.276909	0.0255595	1.779	1.41884	1.84243
clust2	ENSG00000145826	0.0778556	-0.890959	1.33291	-0.890959	0.0464847	-0.890959	-0.60636	-0.890959	-0.0151926	-0.890959	-0.890959	-0.890959	0.405156	-0.158413	-0.028265	2.02934	1.50245	1.65074
clust2	ENSG00000164440	-0.0614295	-0.282091	1.64161	-0.642815	-0.452803	-0.458813	-0.475167	-0.149207	-0.465766	-0.642815	-0.642815	-0.642815	-0.482138	-0.642815	-0.642815	1.62586	2.74493	0.671908
clust2	ENSG00000103326	0.120241	1.30228	1.1492	-0.92954	-0.757853	-0.643067	-0.899217	-0.599792	-0.778719	-0.733247	-0.709593	-0.979479	-0.00760273	-0.511697	0.0650222	1.71126	1.4974	1.70441
clust2	ENSG00000261678	-0.102619	0.994429	0.925074	-0.484392	-0.292487	-0.799419	-0.966829	-0.665922	-0.805736	-0.966829	-0.670648	-0.675563	-0.676494	-0.441349	0.377891	2.1149	1.31112	1.82486
clust2	ENSG00000172238	0.229566	0.248991	1.18598	-0.635843	-0.635843	-0.635843	-0.635843	-0.455356	-0.444253	-0.635843	-0.635843	-0.635843	-0.635843	-0.635843	-0.635843	1.70633	1.41233	2.47484
clust2	ENSG00000185347	-0.471998	1.01335	0.565579	-0.70479	-0.187752	-0.625889	-0.68836	-0.234904	-0.773285	-0.354569	-0.300232	-0.298162	-1.01318	-0.66648	-0.927275	2.03671	1.77513	1.85612
clust2	ENSG00000101146	-0.304231	0.946279	1.21297	-0.316026	-0.295397	-0.487324	-1.05973	-0.857501	-1.17983	-0.179338	-0.598632	-0.460175	-0.583871	-0.622685	-0.485787	1.60073	1.83808	1.83247
clust2	ENSG00000120875	0.0253265	0.819925	0.770939	-0.213173	-0.340633	-0.14604	-0.701411	-0.820151	-0.647451	-0.889707	-0.881581	-0.802197	-0.636362	-0.631853	-0.555327	1.90321	1.85128	1.8952
clust2	ENSG00000168393	0.0824827	0.898896	0.830322	-0.451453	-0.626598	-0.58373	-0.793884	-0.435054	-0.935548	-0.810712	-0.59199	-0.354403	-0.712421	-0.293787	-0.820281	1.80247	1.97282	1.82287
clust2	ENSG00000124787	1.04732	0.840748	0.736079	-0.922548	-0.881364	-1.23341	-0.782904	-0.214096	-1.10578	-1.11812	-1.03752	-0.317613	0.285069	0.00455527	0.215502	1.7277	1.7555	1.00088
clust2	ENSG00000106355	1.30676	1.01544	0.922014	-0.227583	-0.56122	-0.576173	-1.43401	-1.1132	-1.59315	-0.703421	-0.588537	-0.320136	-0.0558872	0.100933	-0.334858	1.35661	1.52807	1.27836
clust2	ENSG00000165501	1.16228	0.63253	0.592093	-0.39679	-0.387994	-0.702012	-1.4829	-0.870663	-1.29922	-0.714154	-0.598685	-0.664066	0.371267	-0.190852	-0.273928	1.62813	1.86127	1.3337
clust2	ENSG00000131848	1.6311	0.959874	-0.347341	-0.807917	-0.49244	-0.261704	-0.145358	-0.642441	-0.576447	-0.718251	-0.635082	-0.794351	-0.570703	-0.926792	-0.602382	1.25223	1.57634	2.10167
clust2	ENSG00000156689	1.91458	1.33631	0.216865	-0.778679	-0.435999	-0.255601	-0.593775	-0.898816	-0.281146	-0.791284	-0.418121	-0.516691	-1.00641	-0.641595	-1.00641	1.67128	1.32348	1.16202
clust2	ENSG00000053372	0.967471	0.889504	0.931935	-0.501659	-0.432617	-0.333987	-0.529054	-0.685273	-0.623506	-0.568392	-0.47099	-0.354304	-0.947122	-1.14053	-1.20907	1.73629	1.73589	1.53541
clust2	ENSG00000165891	0.923804	0.655039	0.619696	-0.706178	-0.466054	-0.372202	-0.276398	-0.495577	-0.341249	-0.562721	-0.586916	-0.615757	-1.09891	-1.04128	-1.01716	1.73744	1.73781	1.90661
clust2	ENSG00000104313	0.735791	0.741628	0.336885	-0.709597	-0.706984	-0.754455	-0.507243	-0.671524	-0.408902	-0.383416	-0.552318	-0.594939	-0.754455	-0.681169	-0.754455	2.26925	1.8055	1.59041
clust2	ENSG00000167553	0.73849	0.657382	0.567801	-1.07444	-0.96046	-0.764075	-0.634889	-0.425178	-0.667002	-0.277538	-0.206809	-0.281838	-0.867014	-0.704091	-0.623034	1.82438	1.91477	1.78355
clust2	ENSG00000091129	0.806493	0.893848	0.533212	-0.65746	-0.840299	-0.807096	-0.31886	-0.0159113	-0.386869	-0.672535	-0.711031	-0.582732	-0.839018	-0.876465	-0.900694	1.70308	1.85326	1.81908
clust2	ENSG00000143603	0.3612	0.972133	0.786504	-0.756468	-0.705149	-0.739461	-0.286759	-0.289901	-0.284984	-0.689128	-0.80366	-0.776391	-0.776524	-0.730314	-0.758263	1.87943	1.75916	1.83859
clust2	ENSG00000123136	1.36061	0.698381	0.708703	-0.773083	-0.863012	-0.866639	-0.363063	-0.336269	-0.448251	-0.681844	-0.719145	-0.547114	-0.838391	-0.51706	-0.886829	1.71546	1.7098	1.64775
clust2	ENSG00000133083	1.17867	1.00199	0.982423	-0.904675	-0.907962	-0.917395	-0.193044	-0.295022	-0.277088	-0.520528	-0.566503	-0.552679	-0.91853	-0.926331	-0.926331	1.57049	1.58635	1.58617
clust2	ENSG00000129484	1.12028	0.643514	0.734774	-0.59228	-1.05874	-0.699676	-0.956661	-1.07414	-0.689143	-0.333344	-0.24739	-0.238044	-0.580764	-0.498137	-0.707134	1.58655	1.86221	1.72812
clust2	ENSG00000108671	1.01186	1.16186	1.16499	-1.03085	-1.25574	-1.01985	-0.693273	-0.778792	-0.575847	-0.398672	-0.495727	-0.546304	-0.301525	-0.297222	-0.52731	1.4973	1.61102	1.47407
clust2	ENSG00000143942	1.44197	1.08172	1.19499	-0.836754	-1.21858	-0.97141	-0.295186	-0.792437	-0.883675	-0.308644	-0.363979	-0.333495	-0.698367	-0.511723	-0.756601	1.34339	1.48359	1.4252
clust2	ENSG00000158164	1.03621	1.14496	1.1539	-0.381358	-0.420237	-0.329005	-0.541724	-0.598439	-0.714543	-1.04993	-0.819675	-0.901538	-0.625492	-0.534968	-1.07762	1.5325	1.68224	1.44473
clust2	ENSG00000213186	1.32793	0.977955	1.14463	-0.222757	-0.574319	-0.404538	-0.842029	-0.877367	-0.834369	-0.993358	-0.443024	-0.663426	-0.891639	-0.480058	-0.795548	1.56198	1.52462	1.48532
clust2	ENSG00000204856	1.24453	0.897111	0.70766	-0.706981	-0.667127	-0.63351	-0.649402	-0.499813	-0.605254	-1.23576	-0.817508	-1.13155	-0.143453	-0.314896	-0.349257	1.57998	1.76012	1.56512
clust2	ENSG00000110958	1.33378	1.00143	1.02144	-0.679981	-0.699673	-0.675081	-0.817731	-0.862243	-0.694183	-0.831333	-0.731447	-0.731626	-0.46869	-0.291349	-0.598178	1.57089	1.6398	1.51417
clust2	ENSG00000154473	1.68302	0.950417	0.728056	-0.469402	-0.562625	-0.711023	-0.999523	-0.944635	-0.77274	-0.958695	-0.550819	-0.726953	-0.302563	-0.327778	-0.581087	1.46506	1.64542	1.43587
clust2	ENSG00000172927	-0.314597	1.74541	1.21215	-0.626846	-0.325049	-0.334543	-0.626846	-0.626846	-0.626846	-0.357669	-0.626846	-0.626846	-0.626846	-0.626846	-0.626846	2.77975	0.696501	0.539673
clust2	ENSG00000273540	-0.651642	2.13611	1.79206	-0.651642	-0.651642	-0.651642	-0.247183	-0.450339	-0.651642	-0.0398339	-0.651642	-0.651642	-0.651642	-0.651642	-0.651642	1.86897	1.01092	0.445714
clust2	ENSG00000100351	0.00113681	2.65421	0.575109	-0.305282	-0.789669	-0.789669	-0.789669	0.318006	-0.789669	-0.789669	-0.347338	-0.789669	-0.142332	-0.789669	-0.789669	1.13715	1.03577	1.39092
clust2	ENSG00000171056	0.562158	2.85615	1.06515	-0.40319	-0.849914	-1.01707	-0.170631	-0.446345	-0.558651	-0.578111	-0.320688	-0.331917	-0.465993	-0.634507	-1.01707	1.56596	0.396293	0.348386
clust2	ENSG00000173825	0.770663	2.48558	1.11253	-0.60117	-0.407455	-0.586071	-0.93716	-0.645847	-0.609855	-0.783059	-0.797485	-0.394293	-0.267083	-0.343313	-0.925044	1.12347	1.64785	0.157733
clust2	ENSG00000185838	0.478918	1.88476	1.37808	-0.582255	-0.531502	-0.195435	-0.579324	-1.01703	-1.14282	-0.258328	-0.608712	-0.415648	-0.932366	-0.581457	-0.892794	1.46063	1.37188	1.16339
clust2	ENSG00000130816	0.914173	1.54271	1.67326	-0.412154	-0.453686	-0.410616	-0.738891	-0.911215	-0.802944	-0.131733	-0.237678	-0.30409	-1.07816	-1.22503	-1.07116	1.2593	1.14155	1.24637
clust2	ENSG00000160299	0.911845	1.38513	1.52382	-0.564526	-0.610546	-0.51802	-0.566353	-1.10324	-0.761608	-0.274778	-0.385738	-0.305477	-0.943917	-1.10782	-0.801686	1.30909	1.18426	1.62956
clust2	ENSG00000141499	0.973571	1.62252	1.50054	-0.575298	-0.812074	-0.774102	-0.820122	-0.59317	-0.555764	-0.514432	-0.515616	-0.321178	-0.978232	-0.769239	-0.855155	1.46452	1.30165	1.22158
clust2	ENSG00000189410	1.22009	1.63523	1.43491	-0.734687	-0.798682	-0.609184	-0.854686	-0.836795	-0.554859	-0.156912	-0.542797	-0.504134	-0.650839	-0.977145	-0.844442	1.41465	1.03959	1.3207
clust2	ENSG00000148229	0.619421	1.29557	1.37941	-0.81426	-0.772303	-0.816706	-0.514519	-0.793868	-0.578274	-0.336139	-0.0836689	-0.34217	-1.03662	-0.63707	-1.11448	1.44279	1.66106	1.44183
clust2	ENSG00000169258	0.890921	1.15733	1.49978	-0.643398	-0.834653	-0.385985	-0.686047	-0.634685	-0.676708	-0.526317	-0.630873	-0.454007	-0.839648	-0.545116	-1.16007	1.61711	1.187	1.66536
clust2	ENSG00000167889	0.482595	2.1496	1.91026	-0.493315	-0.488001	-0.283529	-0.801825	-0.744398	-0.751473	-0.535648	-0.397316	-0.520812	-0.866457	-0.874727	-0.858113	1.21523	0.893176	0.964753
clust2	ENSG00000183763	0.728534	1.89604	1.76075	-0.165622	-0.280926	-0.252596	-1.06813	-1.16782	-1.01849	-0.668715	-0.519158	-0.109977	-0.722607	-0.812748	-0.824066	1.03475	1.11511	1.07567
clust2	ENSG00000134222	0.92178	1.88204	1.82099	-0.232817	-0.111714	-0.103737	-0.976888	-1.06826	-0.82413	-0.540419	-0.651595	-0.56696	-1.03843	-0.83862	-0.714519	0.944501	1.13709	0.961692
clust2	ENSG00000099381	1.04659	1.95958	1.91658	-0.35459	-0.31134	-0.253847	-0.678805	-0.85985	-0.821427	-0.632931	-0.500248	-0.511494	-0.944135	-1.11298	-0.747187	0.935838	0.891065	0.979174
clust2	ENSG00000129351	0.801516	1.79252	1.94258	-0.185538	-0.249101	-0.233221	-0.883094	-0.993727	-0.827789	-0.557866	-0.483094	-0.535214	-0.769892	-1.10519	-0.87869	1.03822	0.997349	1.13023
clust2	ENSG00000075702	1.40281	1.38154	1.31772	-0.491052	-0.493859	-0.678963	-1.01121	-0.929251	-0.922662	-0.255067	-0.322523	-0.259775	-0.819264	-0.937565	-0.896255	1.35019	1.29931	1.26588
clust2	ENSG00000102172	1.30069	1.35022	1.34641	-0.268075	-0.438382	-0.41575	-0.912515	-0.713599	-0.785916	-0.26606	-0.231475	-0.122629	-1.26728	-1.12958	-1.21845	1.29743	1.34668	1.12826
clust2	ENSG00000089685	0.954855	1.39958	1.38938	-0.239838	-0.534561	-0.399724	-1.28724	-1.13727	-1.11942	-0.0562888	-0.0515453	0.0414048	-0.983092	-0.912587	-0.892561	1.29798	1.29268	1.23825
clust2	ENSG00000160193	1.24987	1.56233	1.4509	-0.367417	-0.399838	-0.398216	-0.972278	-0.982292	-0.920052	0.134483	-0.149009	0.0275107	-0.995214	-1.43435	-1.02553	1.09672	0.853756	1.26862
clust2	ENSG00000151692	0.536194	1.5753	1.6528	-0.300723	-0.25054	-0.415104	-0.39682	-0.30662	-0.461168	-0.340574	-0.375807	-0.414848	-1.39151	-1.3676	-1.40922	1.28253	1.16263	1.2211
clust2	ENSG00000158321	0.431335	1.72876	1.77433	-0.528341	-0.510702	-0.513345	-0.162444	-0.329437	-0.183405	-0.412271	-0.471105	-0.61407	-1.27427	-1.28272	-1.20558	1.16606	1.14622	1.24097
clust2	ENSG00000137337	0.0128206	1.78222	1.88131	-0.375787	-0.366445	-0.248429	-0.684218	-0.693763	-0.58922	-0.286051	-0.277539	-0.291365	-1.0906	-1.33929	-1.03149	1.23167	1.03627	1.32992
clust2	ENSG00000143179	0.353134	1.80604	1.72135	-0.401521	-0.434931	-0.447274	-0.358215	-0.539975	-0.552289	-0.0289529	-0.132369	-0.15123	-1.35365	-1.3839	-1.39697	1.12874	1.11717	1.05483
clust2	ENSG00000162073	0.801627	1.50085	1.90729	-0.527493	-0.688616	-0.309401	0.0643758	-0.0153963	-0.566466	0.0949823	-0.224324	-0.283107	-1.60428	-1.55535	-1.2861	1.04597	0.995217	0.650213
clust2	ENSG00000143368	0.389929	1.40343	1.24199	-0.280898	-0.384992	-0.194743	-0.543475	-0.388258	-0.77185	-0.17644	-0.208846	-0.0307221	-1.33671	-1.38237	-1.53689	1.48515	1.36816	1.34754
clust2	ENSG00000172009	1.00589	1.51531	1.52588	-0.513185	-0.811548	-0.745745	-0.477239	-0.334164	-0.697452	-0.298644	-0.169026	-0.174617	-1.06306	-1.38551	-1.1018	1.28567	1.31932	1.11992
clust2	ENSG00000131504	0.943402	1.51124	1.66328	-0.543671	-0.382971	-0.554817	-0.402729	-0.690645	-0.380225	-0.173505	-0.349375	-0.289109	-1.32104	-1.32806	-1.25206	1.22649	1.09394	1.22985
clust2	ENSG00000186297	1.01077	1.26807	1.36796	-0.55576	-0.444054	-0.616752	-0.246949	-0.317364	-0.202851	-0.343611	-0.24677	-0.36145	-1.43163	-1.4141	-1.38456	1.35778	1.35228	1.209
clust2	ENSG00000134809	1.31161	1.57789	1.1128	-0.804488	-0.886983	-0.617144	-0.848808	-0.141833	-0.746732	-0.233139	-0.665206	-0.310562	-1.24893	-0.693401	-0.730964	1.32646	1.55699	1.04244
clust2	ENSG00000161980	1.58595	1.29736	1.17656	-0.502572	-0.780073	-0.845573	-0.391246	-0.0741718	-0.704349	-0.6371	-0.588616	-0.587614	-0.975019	-0.955232	-0.951251	1.45339	1.49905	0.980505
clust2	ENSG00000099901	1.65399	1.29155	1.28154	-0.542921	-0.630553	-0.602666	-0.662433	-0.261685	-0.729082	-0.680692	-0.401858	-0.199789	-1.14706	-0.99329	-1.1035	1.28655	1.35873	1.08317
clust2	ENSG00000169689	1.83823	1.4593	1.42668	-0.514263	-0.627241	-0.61919	-0.508605	-0.32218	-0.883095	-0.471945	-0.463649	-0.30928	-1.25381	-0.958852	-0.942725	1.04529	1.21066	0.894681
clust2	ENSG00000172336	1.119	1.23049	1.29978	-0.775188	-0.875052	-0.556479	-0.907428	0.0994134	-0.212616	-0.729639	-0.721028	-0.458708	-1.05968	-0.727103	-0.966484	1.47384	1.64906	1.11782
clust2	ENSG00000183684	0.918869	1.21146	1.17608	-0.558995	-0.595933	-0.590261	-0.830421	0.112908	-0.578181	-0.931627	-0.652358	-0.579575	-0.999726	-0.67879	-1.02855	1.56832	1.64889	1.38789
clust2	ENSG00000137656	0.937495	1.6244	1.45049	-0.755887	-0.30172	-0.310684	-0.834029	0.100398	-0.561367	-0.704549	-0.747202	-0.685105	-0.965338	-1.06667	-1.0225	1.12313	1.33461	1.38452
clust2	ENSG00000125835	1.10036	1.47628	1.2982	-0.922417	-0.733314	-0.714252	-0.562261	0.0415905	-0.451575	-1.01994	-0.710685	-0.746229	-0.867339	-0.657055	-0.676265	1.43213	1.4785	1.23427
clust2	ENSG00000170515	1.22349	1.48756	1.60527	-0.480521	-0.546443	-0.837055	-0.610981	-0.165752	-0.604167	-0.972938	-0.848063	-0.833992	-0.830629	-0.600061	-0.751487	1.21382	1.35245	1.1995
clust2	ENSG00000162975	0.56111	2.2164	1.67868	-0.677771	-0.761044	-0.761044	-0.607479	-0.324915	-0.599042	-0.45852	-0.761044	-0.613278	-0.761044	-0.62589	-0.6802	1.39011	1.32779	0.457184
clust2	ENSG00000005448	0.786886	1.88877	1.71147	-0.922748	-0.524278	-1.01878	-0.529984	0.00376397	-0.423516	-0.827163	-0.714646	-0.686758	-0.887484	-0.140649	-1.04358	1.15199	1.07049	1.10621
clust2	ENSG00000132017	0.379842	1.7853	1.55733	-0.79266	-0.63042	-0.931432	-0.335177	0.0261641	-0.22164	-0.884939	-0.794466	-0.621916	-0.896285	-0.684037	-0.923631	1.40946	1.31627	1.24225
clust2	ENSG00000082556	1.19302	2.16242	1.39635	-0.631625	-0.847472	-0.847472	0.389854	-0.713199	-0.634642	-0.31815	-0.650254	-0.782164	-0.847472	-0.847472	-0.847472	0.791248	1.19884	0.835661
clust2	ENSG00000131467	0.868249	1.60781	1.60862	-0.99809	-1.12694	-1.05527	-0.435618	-0.854168	-0.471623	-0.186955	-0.149621	-0.202366	-0.752876	-0.715711	-0.858557	1.13635	1.27846	1.30831
clust2	ENSG00000097021	0.746558	1.87309	1.8397	-0.906681	-0.98809	-0.942046	-0.565524	-0.22745	-0.517945	-0.241536	-0.256527	-0.20675	-0.868968	-0.956315	-0.980056	1.01867	1.1717	1.00817
clust2	ENSG00000171316	1.00821	1.71041	1.86729	-0.845281	-1.02088	-0.833093	-0.482697	-0.587015	-0.417906	-0.276726	-0.575303	-0.491137	-0.760974	-0.885399	-0.767983	1.08981	1.08159	1.18709
clust2	ENSG00000104783	0.218484	1.38523	1.24064	-0.360178	-0.831836	-0.021308	-0.717791	-0.876159	0.661764	-0.55801	-1.03701	-0.442525	-1.04016	-0.912928	-1.02701	1.28465	1.78651	1.24765
clust2	ENSG00000134802	0.1736	1.46596	1.5012	-0.440171	-1.01064	-0.50521	-0.586458	-0.455904	-0.342812	-1.10084	-0.688915	-0.934562	-0.515261	-0.566737	-0.496165	1.66584	1.76154	1.07554
clust2	ENSG00000143786	0.36271	1.30644	1.4955	-0.781472	-0.902169	-0.592311	-0.779814	-0.314139	-0.635762	-0.563431	-0.429068	-0.86437	-0.747627	-0.553272	-0.716304	1.57073	1.54785	1.59651
clust2	ENSG00000108106	0.370396	1.49932	1.43197	-0.748041	-0.81306	-0.700512	-0.626182	-0.313949	-0.673866	-0.841686	-0.758668	-0.490481	-0.810984	-0.46321	-0.659729	1.53166	1.6493	1.41772
clust2	ENSG00000154027	0.148903	1.35755	1.10887	-0.773359	-0.729472	-0.73085	-0.577382	-0.511593	-0.591334	-0.708665	-0.72303	-0.55161	-0.57407	-0.68421	-0.594005	1.76859	1.79374	1.57192
clust2	ENSG00000187122	0.138032	1.44153	1.29371	-0.761476	-0.650792	-0.627941	-0.615805	-0.477388	-0.60775	-0.59036	-0.665879	-0.575777	-0.761476	-0.675581	-0.735814	1.41232	2.02346	1.43699
clust2	ENSG00000176165	1.03015	1.07157	1.47838	-0.738436	-0.738436	-0.738436	-0.379978	-0.382239	-0.547561	-0.738436	-0.738436	-0.738436	-0.738436	-0.579673	-0.738436	1.05853	2.35644	0.801864
clust2	ENSG00000177468	0.787805	0.92327	1.58766	-0.676458	-0.676458	-0.676458	-0.676458	-0.676458	-0.676458	-0.676458	-0.537503	-0.676458	-0.676458	-0.676458	-0.676458	1.09589	1.96602	1.61789
clust2	ENSG00000164900	0.0781381	1.24567	2.49962	-0.940493	-0.940493	-0.448561	-0.712913	-0.0706334	0.811356	-0.486874	-0.501128	-0.508336	-0.940493	-0.940493	-0.940493	1.05504	0.97859	0.76249
clust2	ENSG00000148488	0.0230989	1.37575	2.48138	-0.936641	-0.760563	-0.936641	0.168908	-0.40729	0.0806064	-0.625318	-0.488138	-0.14356	-0.936641	-0.936641	-0.936641	1.29402	0.699257	0.985055
clust2	ENSG00000123700	0.591878	1.92192	1.77649	-0.968648	-0.925712	-0.968648	-0.217665	-0.191581	-0.211974	-0.74509	-0.143404	-0.490406	-0.75629	-0.968648	-0.929263	1.24462	0.649614	1.33281
clust2	ENSG00000066117	0.260154	2.03897	2.1978	-0.881375	-0.851486	-0.766248	-0.32123	-0.271573	-0.332667	-0.475565	-0.528381	-0.601282	-0.760353	-0.987083	-0.60624	0.949892	0.926586	1.01008
clust2	ENSG00000116128	0.271036	2.05664	2.18037	-0.755861	-0.504253	-0.762576	-0.149517	-0.279191	-0.240859	-0.365006	-0.326366	-0.629545	-1.05427	-1.10481	-0.981492	0.958682	0.615775	1.07125
clust2	ENSG00000066056	-0.351833	1.85508	2.00741	-0.769813	-0.653945	-0.731818	-0.324273	-0.0663549	0.17661	-0.771896	-0.642396	-0.773562	-0.806373	-0.806373	-0.806373	0.997561	1.00015	1.4682
clust2	ENSG00000133874	0.0157391	1.61395	1.84347	-0.796347	-0.492267	-0.584067	-0.0292547	0.301082	-0.0770077	-0.45684	-0.600552	-0.722908	-1.1409	-1.45202	-0.956163	0.917526	1.31795	1.29861
clust2	ENSG00000132970	0.342278	1.75675	1.96732	-1.05321	-0.464175	-0.399038	0.126828	-0.310236	-0.116039	-0.72903	-0.99929	-0.824781	-0.660715	-0.868956	-1.09349	0.984763	1.23752	1.1035
clust2	ENSG00000107736	0.105379	1.37259	1.92167	-0.6304	-0.769209	-0.687472	-0.162581	-0.574656	-0.140955	-0.647113	-0.771565	-0.679313	-0.736678	-0.857897	-0.907876	1.30757	1.11293	1.74557
clust2	ENSG00000109991	0.299471	1.47721	2.0519	-0.758687	-0.608825	-0.613529	-0.249521	-0.499109	-0.48314	-0.758687	-0.758687	-0.758687	-0.758687	-0.758687	-0.758687	1.34092	1.17414	1.42129
clust2	ENSG00000197417	0.188517	1.96117	1.81498	-0.816733	0.754953	-0.799198	-0.925674	-0.196244	-0.121183	-1.04549	-0.534996	-0.831987	-0.663893	-0.893212	-0.775318	0.495391	1.31336	1.07556
clust2	ENSG00000100036	-0.0635841	1.60821	1.7357	-0.126621	-0.712256	-0.419218	-0.319329	-0.212352	-0.428933	-0.874073	-0.380691	-0.703106	-1.37412	-0.713656	-1.01022	1.00358	1.31337	1.67731
clust2	ENSG00000155093	0.0823065	1.95446	1.52685	-0.317649	-0.2814	-0.37848	-0.0669035	-0.295134	-0.641572	-0.763962	-0.81568	-0.819672	-0.974247	-1.00307	-1.06777	1.41799	1.25461	1.18932
clust2	ENSG00000128594	0.327547	2.01331	1.68822	-0.760247	-0.652924	-0.605328	-0.733675	-0.759479	-0.482999	-0.307595	-0.409091	-0.459904	-0.959018	-0.890995	-0.709324	1.21077	1.16762	1.32312
clust2	ENSG00000136715	0.517533	1.75315	1.82863	-0.927372	-0.664129	-0.704017	-0.52112	-0.629721	-0.558911	-0.449912	-0.356962	-0.507793	-0.946394	-0.911554	-0.68737	1.13068	1.31682	1.31843
clust2	ENSG00000122778	0.518325	1.83247	2.01792	-0.651138	-0.434198	-0.499185	-0.747083	-0.85355	-0.539798	-0.630636	-0.571881	-0.58595	-0.667558	-0.845145	-0.776663	1.17395	0.908464	1.35166
clust2	ENSG00000184144	0.2406	1.60375	2.03196	-0.658856	-0.583896	-0.497852	-0.726745	-0.5193	-0.637666	-0.683989	-0.644258	-0.686059	-0.706435	-0.726745	-0.639043	1.41039	0.826527	1.59762
clust2	ENSG00000146267	0.903328	1.77179	1.75398	-0.53312	-0.33525	-0.304518	-0.363899	-0.471956	-0.0907396	-0.826254	-0.456842	-0.76	-1.15877	-1.13544	-1.22207	0.936819	1.06058	1.23236
clust2	ENSG00000154928	0.285566	2.07588	1.97668	-0.14791	-0.487941	-0.353278	-0.325891	-0.107565	-0.181817	-0.827721	-0.591757	-0.984284	-1.13921	-1.01252	-1.0445	0.897158	0.936479	1.03264
clust2	ENSG00000196363	0.39848	1.81658	1.82687	-0.177999	-0.367112	-0.026478	-0.414519	-0.210255	-0.371762	-0.992735	-0.7234	-0.654519	-1.14069	-1.02083	-1.28812	1.11672	1.04539	1.18439
clust2	ENSG00000275700	0.808563	1.60342	1.79059	-0.514824	-0.494913	-0.414682	-0.31612	-0.377608	-0.596795	-1.06932	-0.992076	-0.934533	-0.664996	-0.726786	-0.820869	1.23096	1.36305	1.12693
clust2	ENSG00000147234	0.426914	1.90803	2.06435	-0.235077	-0.296084	-0.596696	-0.487297	-0.797077	-0.559552	-0.79632	-0.666462	-0.842108	-0.842108	-0.842108	-0.655423	0.887401	0.947538	1.38208
clust2	ENSG00000196361	0.407632	2.10605	2.00886	0.0024857	-0.681009	-0.559801	-0.47015	-0.417677	-0.629232	-0.75433	-0.814047	-0.757212	-0.814047	-0.814047	-0.814047	0.994162	1.00536	1.00104
clust2	ENSG00000130749	-0.804932	1.99633	1.89774	0.359397	0.0678809	0.438913	-1.30013	-1.20528	-1.03788	0.0082212	-0.200145	-0.116173	-0.681785	-1.25565	-0.477339	0.838212	0.503041	0.969582
clust2	ENSG00000156384	-1.21132	1.33312	1.68238	0.141458	-0.186575	0.3736	-1.01319	-1.60194	-1.03421	-0.205819	0.0497244	0.280239	-0.754103	-0.662349	-0.624562	1.77814	0.739379	0.916012
clust2	ENSG00000014138	-0.687101	1.01469	1.19599	0.69397	0.256821	0.0331502	-1.05571	-1.06101	-1.08188	0.24462	-0.657364	-0.0644981	-1.0904	-0.718833	-1.20435	0.947683	2.02212	1.2121
clust2	ENSG00000174343	-0.0455671	0.569007	1.04561	0.706887	0.0418544	0.0909615	-1.2287	-1.14515	-1.09605	-0.224914	-0.237602	-0.260697	-1.0085	-0.695756	-1.29412	1.68066	1.72682	1.37526
clust2	ENSG00000137404	-0.80488	1.53029	1.59021	0.312022	0.233281	0.148755	-0.664233	-0.815712	-0.841879	-0.62288	-0.608331	-0.425889	-1.06908	-1.08203	-0.896626	1.24882	1.53304	1.23512
clust2	ENSG00000004777	-0.756232	0.905267	0.844171	0.114399	-0.00957484	0.161848	-0.684149	-0.543895	-0.742934	-0.446674	-0.971023	-0.771211	-0.78696	-0.900832	-0.791589	1.76685	1.58355	2.02899
clust2	ENSG00000110987	-1.15011	0.948518	0.89424	0.0192932	-0.193856	0.173528	-0.296793	-0.670429	-0.163516	-0.465494	-0.763404	-0.226865	-1.2214	-1.1138	-0.921681	1.75756	1.87514	1.51907
clust2	ENSG00000188064	0.0896677	2.84969	1.03532	-0.192536	0.0595665	-0.604206	-0.821859	-0.821859	-0.821859	-0.423559	0.125906	0.110387	-0.821859	-0.821859	-0.821859	0.490044	1.67679	-0.285913
clust2	ENSG00000126216	-0.0467688	2.02439	2.26125	-0.0555361	0.1731	-0.11154	-1.02562	-1.06629	-1.14525	-0.489778	-0.220786	-0.432217	-0.864405	-0.599226	-0.816996	0.979974	0.705676	0.730015
clust2	ENSG00000173757	-0.290049	2.22061	2.30238	0.0203265	-0.201203	0.0703792	-0.930316	-1.04709	-1.03753	-0.205415	-0.483904	-0.56508	-0.610256	-0.750455	-0.679767	0.682956	0.688138	0.816274
clust2	ENSG00000161021	-0.0176342	2.17308	2.14485	-0.570272	-0.429192	-0.598463	-0.633247	-1.21852	-0.714916	-0.203021	-0.352352	-0.423108	-0.732068	-0.643851	-0.621117	0.866202	0.856423	1.1172
clust2	ENSG00000126464	-0.330069	2.26301	2.44786	-0.232912	-0.420324	-0.268311	-0.916758	-0.664702	-0.665534	-0.00856658	-0.385157	-0.259614	-0.779844	-1.00628	-0.733493	0.80314	0.405426	0.752129
clust2	ENSG00000158545	0.0441199	2.11658	2.44694	-0.362994	-0.190853	-0.356382	-0.679572	-0.871718	-0.565081	-0.344883	-0.347321	-0.142059	-0.80035	-1.05421	-1.04139	0.846015	0.522457	0.780704
clust2	ENSG00000100867	-0.928471	2.24405	2.32348	-0.334427	-0.154115	-0.563586	-0.764239	-0.54975	-0.455298	0.438786	0.212011	0.450679	-1.06394	-1.03246	-0.996514	0.182138	0.482216	0.509438
clust2	ENSG00000126368	-0.595861	2.32749	2.10556	-0.177178	-0.255352	0.309699	-0.767003	-0.708788	-0.584412	-0.00136268	0.175061	0.317802	-1.10634	-0.95095	-1.46184	0.766973	0.319765	0.286739
clust2	ENSG00000182185	-0.369265	2.36313	1.59113	0.91785	-0.654036	-0.407054	-1.23265	-1.02852	-0.082224	-0.797417	-0.807991	-0.0247296	-0.422853	-0.146978	-1.05158	0.183361	0.703537	1.26628
clust2	ENSG00000170545	-0.151952	1.93662	2.11381	-0.15878	-0.388185	-0.291084	-1.35796	-0.0915262	-0.956038	-0.847184	-1.12197	-0.72393	-0.238874	-0.0173053	-0.37236	0.756086	1.51994	0.390686
clust2	ENSG00000091622	-0.0495777	1.94685	2.20032	-0.683809	-0.720403	-0.807857	-0.664214	-0.596872	-0.75466	-0.674267	-0.963642	-0.786692	-0.212973	-0.138664	-0.0976489	1.3737	0.631719	0.99869
clust2	ENSG00000114631	0.375478	1.9842	1.92305	-0.955558	-0.549611	-0.741573	-1.08188	-1.04723	-1.25069	-0.262257	-0.275807	-0.293351	-0.362608	-0.270423	-0.249352	1.09047	1.03702	0.930124
clust2	ENSG00000165244	0.973134	0.68983	1.00111	0.591343	0.651118	0.800237	-1.41927	-1.3962	-1.22111	0.348429	0.063936	0.136413	-1.26953	-1.23339	-1.41444	0.895768	0.875477	0.927126
clust2	ENSG00000101412	0.713081	0.960596	0.795392	0.692767	0.952379	0.678097	-1.30094	-1.36693	-1.50428	-0.261018	-0.136617	-0.135948	-1.16602	-1.18419	-0.960668	1.11754	0.992604	1.11415
clust2	ENSG00000137310	0.426011	0.945479	0.977574	0.593046	0.511535	0.552905	-1.29872	-1.43876	-1.49038	0.233618	0.0776921	0.0801814	-1.136	-1.27597	-1.13413	1.10292	1.1502	1.1228
clust2	ENSG00000230453	0.678134	1.25407	1.64722	0.381584	0.0399591	0.305243	-1.22992	-1.49961	-1.43641	0.102234	0.162522	0.244029	-1.11331	-1.01321	-1.1295	0.696428	0.60845	1.30209
clust2	ENSG00000051180	0.779712	1.43635	1.41075	0.215698	0.206958	0.1156	-1.4804	-1.36029	-1.44959	0.178894	-0.0292586	0.313421	-1.21889	-1.04201	-0.872144	0.829689	1.05186	0.913652
clust2	ENSG00000101057	1.0161	1.40644	1.46108	0.234693	0.233551	0.226635	-1.44691	-1.46321	-1.44613	0.110071	0.137567	0.141104	-0.998338	-1.09243	-1.01813	0.772208	0.912668	0.813032
clust2	ENSG00000146670	1.16786	1.47527	1.43353	0.0148547	-0.0215306	-0.106266	-1.36009	-1.22578	-1.33703	-0.079628	-0.0997175	-0.0358959	-1.00674	-1.05158	-0.908088	1.02752	1.0905	1.02282
clust2	ENSG00000127564	0.747582	1.42914	1.31696	0.10237	-0.0810787	0.119594	-1.29454	-1.2436	-1.29961	0.012781	0.0922976	0.0336262	-1.17894	-1.067	-1.12048	1.19626	1.12203	1.11261
clust2	ENSG00000177084	0.984319	1.29223	1.3573	0.148191	0.115201	0.0673973	-1.33576	-1.3692	-1.29952	0.0445317	-0.113184	-0.136793	-1.10542	-0.992375	-1.03519	1.1593	1.0266	1.19238
clust2	ENSG00000093009	1.17879	1.06938	1.10586	0.147228	-0.0240273	0.237907	-1.4166	-1.48215	-1.55375	0.172664	0.121237	0.335196	-0.942763	-0.940226	-1.14965	0.97592	1.08809	1.07689
clust2	ENSG00000105486	1.15222	1.26832	1.38442	0.245178	0.287511	0.342104	-1.59549	-1.21338	-1.34267	-0.0115064	-0.111152	-0.0497481	-1.21115	-1.0172	-0.939547	0.826882	1.0737	0.911498
clust2	ENSG00000131153	1.4196	1.15837	1.31275	0.259321	0.341052	0.214008	-1.27713	-1.35944	-1.34701	0.0076074	0.103721	-0.0384738	-1.07551	-1.28153	-1.10104	0.890744	0.949513	0.823434
clust2	ENSG00000178502	1.73603	0.301585	0.941117	0.134544	0.891897	0.00966107	-1.55762	-2.06349	-1.34287	0.532741	-0.328183	0.586283	-0.802522	-0.848125	-0.248506	0.419482	0.69523	0.942734
clust2	ENSG00000077514	1.62377	0.586411	0.555764	0.327609	0.260957	0.175553	-1.38788	-1.4622	-1.57526	-0.257157	-0.314617	0.0685675	-0.735512	-0.896284	-0.761534	1.12117	1.19143	1.47922
clust2	ENSG00000152253	1.22512	0.58869	0.6558	0.317712	0.320973	0.343558	-1.54214	-1.59802	-1.72248	-0.373793	-0.133799	-0.0133322	-0.629433	-0.876957	-0.431651	1.31057	1.27721	1.28197
clust2	ENSG00000139618	1.53728	0.206155	0.488019	0.657546	0.452639	0.5107	-1.57101	-1.62278	-1.61502	0.117121	0.32157	0.0724656	-0.798075	-1.07619	-0.769237	0.972104	0.894329	1.22239
clust2	ENSG00000148773	1.35774	0.46945	0.560278	0.504247	0.53605	0.522928	-1.64887	-1.73495	-1.66936	0.155201	0.0206584	0.0271556	-0.696196	-0.865691	-0.75348	1.052	0.984246	1.17859
clust2	ENSG00000012048	1.69702	0.582604	0.682503	0.137021	0.203654	0.225743	-1.38164	-1.37765	-1.42917	0.192987	0.104112	-0.0319298	-1.00296	-1.02114	-1.08107	1.19189	1.19732	1.11071
clust2	ENSG00000111247	1.71752	0.550621	0.635278	0.394365	0.385881	0.300969	-1.46021	-1.69939	-1.1903	-0.0817009	0.103171	-0.113084	-0.852632	-1.09341	-0.926746	1.06879	1.16063	1.10025
clust2	ENSG00000174371	1.64189	0.59068	0.616582	0.495718	0.323455	0.308381	-1.52153	-1.48152	-1.38597	0.0697223	0.0913739	0.27375	-1.03182	-1.11876	-1.00697	1.0933	1.04062	1.00109
clust2	ENSG00000122952	1.26601	0.939673	0.890045	0.379189	0.341973	0.323817	-1.72048	-1.51818	-1.59599	0.0297367	-0.0557944	0.0995714	-0.859049	-0.838166	-0.855721	1.06072	1.07787	1.03478
clust2	ENSG00000151725	1.71277	0.822668	0.9348	0.391262	0.444876	0.255194	-1.51252	-1.50541	-1.67039	-0.104661	-0.148655	-0.184004	-0.849238	-0.742927	-0.759621	0.950813	1.02552	0.939522
clust2	ENSG00000167604	1.77156	1.47004	0.510705	-0.391124	0.575191	0.0587371	-1.66451	-2.15584	-1.17028	-0.0429549	-0.375318	0.846108	-0.350374	-0.0663492	-0.421425	0.66776	-0.00712644	0.745214
clust2	ENSG00000260007	1.93265	1.21036	0.84735	0.180201	0.131511	0.532932	-1.86338	-1.92658	-1.0451	0.117192	-0.281888	0.209196	0.111518	-0.445817	-0.499431	-0.184284	-0.339806	1.31339
clust2	ENSG00000114859	0.760227	0.710497	1.02209	0.561803	0.847306	0.274194	-2.50537	-1.6374	-0.920448	0.47245	0.23672	0.431579	0.234928	-1.6323	-0.185661	0.278383	0.759269	0.291736
clust2	ENSG00000139133	0.766443	0.961709	1.45807	0.518477	1.10935	0.610418	-1.78158	-1.51645	-1.98099	0.0974547	0.247323	-0.38161	-0.00827273	-0.766152	-0.586113	0.838642	0.485983	-0.0727133
clust2	ENSG00000157036	-0.227182	0.582718	0.369879	-0.116294	0.174981	-0.0316662	-1.2812	-1.97377	-1.59086	0.308696	0.24939	0.607327	-0.682369	-0.750615	-0.114481	1.2373	1.71012	1.52803
clust2	ENSG00000131944	-1.21362	1.04909	0.981823	0.350243	-0.105695	0.376505	-1.46397	-1.42015	-1.66096	0.032954	-0.172887	0.284936	-0.305474	-0.556804	-0.276667	1.16115	1.40875	1.53077
clust2	ENSG00000198824	-0.620956	0.895768	1.11606	0.291781	0.312102	0.39269	-1.46335	-1.81611	-1.45146	0.0418998	0.49007	0.233745	-0.770613	-0.932168	-0.471183	1.2767	1.30487	1.17016
clust2	ENSG00000119737	0.284561	1.24747	0.811656	0.0354747	0.144468	-0.520562	-2.30225	-2.10096	-0.36922	0.00617285	-0.0399375	0.448163	-0.259323	-0.649846	-0.0885011	1.18729	1.31324	0.852103
clust2	ENSG00000161888	0.613871	1.05608	0.951875	0.396986	0.221861	0.474143	-1.80345	-1.40673	-1.8123	0.0154536	-0.155575	0.0161649	-0.843762	-0.536681	-0.68671	1.30087	1.25789	0.940006
clust2	ENSG00000105011	0.226244	1.20917	1.13263	0.368164	0.351114	0.310815	-1.49237	-1.64194	-1.50739	-0.0559619	0.214072	-0.0651726	-0.790852	-1.00308	-0.834476	1.2031	1.21958	1.15633
clust2	ENSG00000183856	0.204388	0.87309	0.840358	0.423448	0.379781	0.308297	-1.58101	-1.65072	-1.49386	0.217446	0.00114915	0.0232633	-0.762321	-0.936165	-0.851173	1.39635	1.17072	1.43695
clust2	ENSG00000109674	0.902424	1.16806	1.01618	0.231477	0.235747	-0.0892414	-1.26255	-1.41199	-1.40218	-0.535637	-0.270995	-0.263037	-0.814147	-0.977795	-0.633903	1.37251	1.51461	1.22048
clust2	ENSG00000091651	0.982291	1.06782	1.0503	0.133202	0.00815479	0.00665147	-1.36445	-1.34142	-1.27679	-0.140723	-0.093779	-0.176105	-1.05617	-0.911541	-0.962728	1.38164	1.42719	1.26645
clust2	ENSG00000149503	1.14064	0.979134	1.13126	-0.0494869	-0.0146351	-0.0696761	-1.42671	-1.48895	-1.20131	-0.0558677	-0.222707	-0.0769452	-0.826677	-1.06144	-0.752339	1.34873	1.31008	1.3369
clust2	ENSG00000186185	1.14473	1.10219	1.09603	0.280464	0.119821	0.182467	-1.53527	-1.37642	-1.39779	-0.193822	-0.121561	-0.19524	-0.911899	-1.04486	-0.759923	1.1935	1.16581	1.25177
clust2	ENSG00000113368	1.0567	1.1461	1.15523	0.10089	0.095354	0.0666858	-1.47298	-1.43827	-1.52592	-0.126569	-0.137348	-0.0989528	-0.935567	-0.783622	-0.778064	1.21381	1.23825	1.22427
clust2	ENSG00000178999	0.864658	1.29579	1.25955	0.117595	0.111476	0.0558025	-1.48704	-1.40434	-1.61252	-0.265727	-0.103425	-0.107796	-0.862306	-0.760073	-0.685485	1.19465	1.25944	1.12974
clust2	ENSG00000088325	1.05148	1.17935	1.17438	-0.0621233	-0.0185656	-0.0782233	-1.47214	-1.47386	-1.37083	-0.0835944	-0.0793958	-0.0878949	-0.756265	-0.858884	-0.864744	1.25318	1.27135	1.27678
clust2	ENSG00000237649	0.94848	1.2945	1.26013	0.0397639	0.0436481	0.0901957	-1.49965	-1.53154	-1.27289	-0.086168	-0.179026	-0.00544624	-0.88288	-0.94151	-0.831889	1.18355	1.15501	1.21573
clust2	ENSG00000101945	0.572756	1.53693	0.973581	-0.246812	0.296723	-0.0436962	-1.30497	-1.4734	-1.5501	-0.0826899	-0.318163	0.0626565	-0.737346	-0.604496	-0.946932	1.43391	1.25552	1.17653
clust2	ENSG00000188486	0.17819	1.06375	0.984307	0.0611122	0.116244	-0.00935977	-1.41679	-1.49189	-1.39845	-0.24372	-0.202942	-0.202268	-0.671057	-0.744644	-0.639125	1.54861	1.56875	1.49928
clust2	ENSG00000075218	0.497981	0.892946	1.01704	0.19809	0.33313	0.17315	-1.37423	-1.43665	-1.59624	-0.0742044	-0.12909	-0.233394	-0.728184	-0.927229	-0.863639	1.47176	1.37855	1.40022
clust2	ENSG00000134690	0.702679	1.15472	1.17376	0.000974731	0.0305287	-0.0510418	-1.35289	-1.41349	-1.57996	-0.0513667	-0.0907211	-0.214162	-0.770722	-0.80784	-0.800715	1.34355	1.36845	1.35824
clust2	ENSG00000135451	0.681897	1.11137	0.967301	0.160507	0.0198481	0.0178867	-1.50519	-1.54776	-1.59171	-0.0513904	-0.208024	-0.338931	-0.567045	-0.633491	-0.681249	1.30886	1.4109	1.44622
clust2	ENSG00000112984	1.09657	0.933773	0.87073	0.183471	0.254829	0.211967	-1.83606	-2.01362	-1.58564	-0.160283	-0.239531	-0.257853	-0.249195	-0.271532	-0.277148	1.06042	1.13614	1.14297
clust2	ENSG00000136451	0.780151	0.865582	1.04405	0.384455	0.386758	0.245074	-1.77276	-1.85193	-1.50152	-0.0347884	-0.0732449	-0.31949	-0.475563	-0.550086	-0.692807	1.11059	1.19477	1.26075
clust2	ENSG00000133119	1.12412	0.832693	0.915336	0.0469131	0.109578	0.0896513	-1.61985	-1.63454	-1.50108	-0.0071907	0.0075167	0.0523091	-0.57927	-1.01838	-0.633572	1.27413	1.31439	1.22723
clust2	ENSG00000165304	1.14437	0.679259	0.718199	0.144352	0.225869	0.158545	-1.6009	-1.5439	-1.5565	-0.0584033	-0.135225	-0.119225	-0.789398	-0.631053	-0.746428	1.34989	1.37291	1.38763
clust2	ENSG00000145386	1.4599	0.797375	0.811863	0.0371326	0.0873401	0.0412558	-1.55503	-1.71821	-1.62594	-0.280241	-0.196788	-0.270525	-0.413286	-0.511253	-0.433583	1.23649	1.25667	1.27682
clust2	ENSG00000068489	0.97554	0.933218	1.0552	0.0919703	0.0467536	0.128778	-1.70288	-1.44544	-1.54291	-0.212938	-0.33482	-0.257945	-0.618465	-0.53989	-0.602618	1.37006	1.34708	1.30931
clust2	ENSG00000111665	1.03872	0.721322	0.950322	0.231066	-0.0784531	0.0715229	-1.67032	-1.44357	-1.62138	-0.393247	-0.212291	-0.379332	-0.531457	-0.476031	-0.412139	1.3363	1.49161	1.37736
clust2	ENSG00000128578	1.03441	1.40388	1.40015	-0.14549	-0.195087	0.108838	-1.50721	-1.49157	-1.62403	-0.0339637	0.385264	-0.113102	-0.51199	-0.923963	-0.756602	0.975448	0.970341	1.02468
clust2	ENSG00000175063	1.08855	1.08239	1.0838	0.263853	0.141776	0.196358	-1.5335	-1.68925	-1.75871	-0.282119	-0.300857	-0.245868	-0.475247	-0.462771	-0.584018	1.14587	1.20861	1.12113
clust2	ENSG00000087586	1.19742	1.11899	1.13216	-0.0285399	0.0903137	-0.0375816	-1.56016	-1.62458	-1.57639	-0.282375	-0.29582	-0.197505	-0.622331	-0.450134	-0.502387	1.23504	1.1898	1.21408
clust2	ENSG00000117399	1.13242	1.26574	1.19553	0.0740027	0.042816	0.117919	-1.72632	-1.56958	-1.60258	-0.247721	-0.174946	-0.111055	-0.53684	-0.602914	-0.543161	1.07008	1.11841	1.09819
clust2	ENSG00000123485	1.27462	1.31194	1.43133	-0.0814188	-0.0499783	-0.114532	-1.56839	-1.58912	-1.46544	-0.139627	-0.198948	-0.185547	-0.572399	-0.574789	-0.625949	1.00276	1.06515	1.08034
clust2	ENSG00000100162	0.766013	1.39503	1.49915	0.203905	0.035845	-0.0150711	-1.72425	-1.27947	-1.56231	-0.473309	-0.207197	-0.260386	-0.587201	-0.576781	-0.577012	1.11304	1.19702	1.05299
clust2	ENSG00000157456	0.972903	1.35834	1.42465	0.21235	0.168094	0.0482169	-1.63806	-1.65772	-1.69915	-0.272236	-0.158888	-0.236308	-0.490028	-0.440215	-0.541797	0.976466	1.01311	0.960271
clust2	ENSG00000188312	0.197835	1.03727	1.39018	-0.166901	-0.340732	-0.0916548	-1.20234	-1.63372	-1.23321	0.505942	0.151138	0.445101	-0.72752	-0.972381	-1.16357	1.29731	1.12578	1.38147
clust2	ENSG00000142230	0.588244	1.84188	2.04272	-0.188974	-0.22431	-0.252193	-1.31753	-1.07534	-1.06014	-0.0651421	-0.00250819	-0.0486383	-0.994247	-0.931598	-0.898426	0.792413	0.986423	0.807371
clust2	ENSG00000154920	0.754401	1.87351	1.85211	-0.121602	0.09738	-0.296061	-1.31233	-1.27354	-1.30099	0.196454	-0.0212987	-0.0727721	-0.859928	-0.830254	-1.02008	0.696144	0.837754	0.801109
clust2	ENSG00000125319	0.448898	1.83364	1.73185	-0.632249	-0.135214	-0.484915	-1.26713	-1.36151	-1.21442	-0.108045	-0.25651	-0.0468155	-0.474524	-0.634646	-0.674674	1.3575	0.999508	0.919261
clust2	ENSG00000161692	0.605085	1.82397	1.83321	-0.269358	-0.415868	-0.259295	-1.07476	-1.50087	-1.19372	-0.237237	-0.178782	-0.182691	-0.558336	-0.839153	-0.659593	1.11525	0.986378	1.00578
clust2	ENSG00000141994	0.99286	1.67919	1.26619	-0.293324	0.152353	0.220699	-1.4754	-1.23714	-1.29607	-0.314309	-0.911173	-0.044568	-0.454897	-0.466906	-1.03826	1.29737	0.762338	1.16103
clust2	ENSG00000159055	1.42197	1.45206	1.57966	-0.168261	-0.381693	0.0490475	-1.56647	-0.880443	-0.98727	-0.398339	-0.302469	-0.434857	-1.21637	-0.572541	-0.68944	0.974149	1.25206	0.86921
clust2	ENSG00000079616	0.97055	1.60185	1.6365	0.200533	0.0254207	0.100401	-1.50237	-1.42128	-1.39475	-0.107069	-0.231076	-0.117137	-0.932587	-0.771657	-0.755197	0.911331	0.898527	0.888021
clust2	ENSG00000135476	0.943546	1.52961	1.64975	0.17895	0.167624	0.225804	-1.39302	-1.30199	-1.3818	-0.0753618	-0.106033	-0.196771	-1.01265	-0.995251	-0.938099	0.914929	0.895197	0.895568
clust2	ENSG00000140534	1.05588	1.65543	1.87364	0.123342	0.106274	-0.106423	-1.13953	-1.36477	-1.08965	-0.121476	-0.192994	-0.214709	-0.992412	-0.995553	-1.0662	0.776175	0.81982	0.873149
clust2	ENSG00000167513	1.26106	1.59835	1.68655	0.291758	0.189756	0.114164	-1.28046	-1.12879	-1.40306	-0.280249	-0.265474	-0.158085	-0.887424	-1.06449	-1.02294	0.849135	0.807994	0.692207
clust2	ENSG00000171960	1.10147	1.73886	1.74596	-0.0400779	-0.277934	-0.255269	-1.37285	-0.75774	-1.59078	-0.364398	-0.228649	-0.486764	-0.722612	-0.570436	-0.740585	0.723841	0.910093	1.18788
clust2	ENSG00000183647	0.884981	1.48525	1.90408	0.0621336	-0.375687	-0.283595	-1.10203	-0.856068	-1.12609	-0.378754	-0.609924	-0.374808	-0.44234	-1.11183	-1.01689	1.03353	0.940778	1.36726
clust2	ENSG00000112877	0.806571	1.69112	1.65583	-0.121804	-0.37685	-0.222857	-1.38176	-1.28741	-0.961222	-0.187131	-0.568962	-0.448233	-0.820884	-0.854554	-0.354693	1.15156	1.01252	1.26877
clust2	ENSG00000160298	0.764694	1.7012	1.59933	0.237929	-0.0428166	0.0564974	-1.57879	-1.15909	-1.12207	-0.240283	-0.239116	-0.386451	-1.0844	-0.953254	-0.58112	0.806996	1.07239	1.14836
clust2	ENSG00000166851	0.746685	1.53731	1.60573	-0.18648	-0.0572642	-0.0762696	-1.38583	-1.40087	-1.45514	-0.237132	-0.26802	-0.246704	-0.618466	-0.713108	-0.674123	1.12662	1.17134	1.13173
clust2	ENSG00000013810	1.01403	1.46209	1.46058	-0.0941431	-0.168451	-0.0687704	-1.37641	-1.26448	-1.32221	-0.211814	-0.176709	-0.277909	-0.920814	-0.868825	-0.714601	1.18089	1.18804	1.1595
clust2	ENSG00000101447	1.1792	1.35943	1.45817	-0.0808142	-0.0620131	-0.0308859	-1.24645	-1.4818	-1.41627	-0.32103	-0.326212	-0.273951	-0.655549	-0.808184	-0.737451	1.10587	1.19599	1.14195
clust2	ENSG00000142945	1.03617	1.32868	1.31897	-0.0819873	-0.00989934	-0.104419	-1.47263	-1.45332	-1.48958	-0.155751	-0.138005	-0.297902	-0.604868	-0.778281	-0.695252	1.23032	1.18961	1.17815
clust2	ENSG00000111206	1.05131	1.38145	1.52085	0.12496	0.0801316	0.16632	-1.32384	-1.54186	-1.45874	-0.249755	-0.20919	-0.312156	-0.715276	-0.976121	-0.663486	1.01019	1.05315	1.06206
clust2	ENSG00000221829	1.09266	1.36361	1.38112	0.0786148	-0.0213375	0.0908717	-1.28556	-1.265	-1.43585	-0.511097	-0.458924	-0.34133	-0.76227	-0.879387	-0.649539	1.14354	1.15266	1.30721
clust2	ENSG00000127586	1.02052	1.52542	1.47016	-0.213732	-0.0471889	-0.25986	-1.19235	-1.05131	-1.30547	-0.327859	-0.364081	-0.380951	-0.897423	-0.847318	-0.814139	1.32183	1.10642	1.25732
clust2	ENSG00000166508	1.25951	1.49906	1.46705	-0.143828	-0.0956538	-0.0798043	-1.29832	-1.15627	-1.25144	-0.476846	-0.40597	-0.474603	-0.76803	-0.746151	-0.790821	1.14323	1.20553	1.11335
clust2	ENSG00000084463	0.821451	1.536	1.72555	0.0530419	0.240227	-0.00460568	-1.1952	-1.12763	-1.26507	-0.363893	-0.389387	-0.405787	-0.762234	-0.900785	-1.16547	1.11033	1.00304	1.09042
clust2	ENSG00000162063	0.808359	1.56039	1.62216	-0.0350615	0.100885	-0.118472	-1.36291	-1.00013	-1.20279	-0.190622	-0.270268	-0.351002	-0.921638	-0.928005	-1.08312	1.00095	1.28737	1.08391
clust2	ENSG00000058056	0.228851	1.29682	1.55685	0.48825	0.0107956	-0.091505	-1.18544	-1.1396	-1.24277	-0.653846	-0.338488	-0.705033	-0.782336	-0.594799	-0.885419	1.27637	1.6218	1.13949
clust2	ENSG00000115163	0.417672	1.45397	1.27198	-0.190605	-0.20854	-0.130188	-1.52394	-1.32671	-1.39733	-0.555735	-0.209386	-0.242629	-0.494392	-0.396293	-0.622214	1.37429	1.4553	1.32475
clust2	ENSG00000111445	1.45288	1.19074	1.27221	0.0409738	-0.040848	-0.255422	-1.07012	-1.30557	-1.24709	-0.372412	-0.285542	-0.496914	-0.703169	-0.848965	-1.04303	1.31983	1.14508	1.24736
clust2	ENSG00000072501	1.21882	1.12582	1.23583	-0.0840485	-0.189275	0.00832555	-1.05771	-1.54562	-1.16004	-0.202154	-0.066088	-0.336573	-0.920856	-1.08136	-0.808262	1.28984	1.1878	1.38554
clust2	ENSG00000121152	1.4288	0.985054	1.18652	-0.141225	-0.0942198	-0.0521615	-1.20212	-1.24095	-1.34277	-0.209153	-0.345535	-0.298916	-0.86592	-0.962591	-0.793718	1.26601	1.34874	1.33416
clust2	ENSG00000160957	1.27877	1.2896	1.35507	-0.219158	-0.177217	-0.0595683	-1.21147	-1.19889	-1.29247	-0.42613	-0.237706	-0.117427	-0.871336	-0.965145	-0.840228	1.31142	1.22192	1.15996
clust2	ENSG00000138780	1.26971	1.14738	0.971936	-0.297592	-0.124545	-0.288015	-1.29818	-1.63618	-1.29585	-0.252246	-0.0307652	-0.393551	-0.64234	-0.567439	-0.626682	1.26818	1.528	1.26819
clust2	ENSG00000205208	1.48816	1.07589	1.16159	-0.493807	-0.33564	-0.362272	-1.32254	-1.13771	-1.15848	-0.395404	-0.122931	-0.520288	-0.584295	-0.723195	-0.680521	1.37007	1.34984	1.39154
clust2	ENSG00000120334	0.908	1.1909	1.09002	-0.230526	-0.258375	-0.106415	-1.2417	-1.90759	-0.971921	-0.0622062	-0.317535	-0.189767	-0.707567	-0.778808	-0.554405	1.46667	1.197	1.47423
clust2	ENSG00000131351	1.08654	0.960636	0.861013	-0.0844484	-0.103452	-0.377133	-1.4059	-1.27793	-1.30852	-0.290968	-0.449501	-0.406593	-0.631937	-0.633009	-0.538167	1.69979	1.58863	1.31095
clust2	ENSG00000146410	1.06633	0.833618	1.00105	-0.0013182	-0.235199	-0.0299177	-1.33196	-1.33357	-1.31783	-0.262059	-0.472874	-0.0619333	-0.916037	-0.842047	-0.557511	1.57684	1.53971	1.34472
clust2	ENSG00000007968	0.301237	1.71028	1.77261	0.298312	0.574372	0.578898	-1.373	-1.30002	-1.24038	0.201375	0.0858537	0.277176	-1.1259	-1.317	-1.00945	0.567413	0.434765	0.563461
clust2	ENSG00000106236	0.43909	1.66362	1.85431	0.390091	0.11002	0.235287	-1.40893	-1.06022	-1.11854	0.394591	0.338181	0.33625	-0.883131	-1.43995	-1.40186	0.519384	0.609155	0.422655
clust2	ENSG00000092470	0.969261	1.37111	1.35491	0.813525	0.749629	0.468979	-1.34019	-1.3728	-1.21216	0.253012	0.147733	0.323248	-1.19528	-1.40753	-1.24885	0.472981	0.472493	0.37991
clust2	ENSG00000073111	1.15128	1.44164	1.4842	0.231821	0.312248	0.41233	-1.18593	-1.23917	-1.07782	0.15231	-0.00510808	0.130502	-1.25652	-1.47642	-1.2559	0.772905	0.657989	0.749635
clust2	ENSG00000100297	1.21626	1.7381	1.69682	0.278402	0.297117	0.296894	-1.26705	-1.10021	-1.09526	0.0238958	0.0625948	0.111495	-1.26905	-1.2079	-1.244	0.53134	0.49594	0.434617
clust2	ENSG00000145996	1.45979	1.53697	1.88426	0.149267	0.195591	-0.0627956	-1.19947	-1.72134	-1.35458	0.21034	-0.342883	-0.0497502	-0.46195	-1.05331	-0.659159	0.570472	0.402142	0.496405
clust2	ENSG00000165792	1.39414	1.37005	1.41012	0.0454332	0.0717514	-0.176262	-1.51644	-1.96926	-0.872611	0.243201	-0.197401	0.308103	-0.527182	-1.12566	-0.755469	0.683805	0.546867	1.06683
clust2	ENSG00000114790	1.10746	1.66044	1.69645	-0.0906166	-0.0182102	0.248317	-1.34887	-1.77466	-1.70496	0.24677	0.164006	0.134876	-0.806816	-0.310714	-0.681501	0.663492	0.180669	0.633864
clust2	ENSG00000132405	0.930446	1.53859	1.95488	0.476736	-0.104384	0.196482	-1.38751	-1.96406	-1.01827	0.683318	0.0148017	0.0766438	-0.612746	-0.989336	-0.792875	0.334951	0.155634	0.506698
clust2	ENSG00000156509	0.334005	1.85858	1.9425	0.350101	0.468314	0.455129	-1.36674	-1.26427	-1.47364	-0.778792	-0.50468	-0.325098	-0.404388	-0.744588	-0.493662	1.06706	0.538318	0.341845
clust2	ENSG00000122966	0.512364	1.81736	1.76458	0.0514981	0.117164	-0.00696073	-1.45531	-1.46033	-1.39549	-0.387059	-0.404311	-0.334771	-0.624546	-0.650207	-0.381246	0.984371	0.789528	1.06338
clust2	ENSG00000010292	0.684801	1.69874	1.73141	0.177971	0.278501	0.227836	-1.52283	-1.82463	-1.46945	-0.230169	-0.169094	-0.205831	-0.528786	-0.586481	-0.502516	0.786527	0.687608	0.766389
clust2	ENSG00000186193	0.970497	1.77175	1.62643	0.122499	0.250401	0.299843	-1.56756	-1.44789	-1.455	-0.402591	-0.498861	-0.386168	-0.464717	-0.644756	-0.556551	0.633231	0.837763	0.911687
clust2	ENSG00000265763	0.889102	1.5466	1.74406	0.689459	0.353379	0.518444	-0.689131	-1.14757	-0.76652	-0.322123	-0.816458	0.0329961	-1.43581	-1.31454	-1.23707	0.496098	0.479064	0.980024
clust2	ENSG00000128973	0.240554	1.6273	1.69139	0.517158	0.499816	0.195952	-1.5547	-0.938809	-1.29528	-0.196469	-0.313637	-0.274546	-0.928054	-1.29445	-0.722026	1.00595	0.640442	1.0994
clust2	ENSG00000149929	0.0442765	1.9973	1.76292	0.166949	0.312404	0.241704	-1.18998	-0.79307	-1.03035	-0.383143	-0.366237	-0.0445336	-1.06051	-0.939303	-1.38641	0.860262	1.01437	0.793343
clust2	ENSG00000160447	0.482781	2.05494	1.98619	-0.161319	0.176604	0.0819857	-1.16536	-0.987907	-1.02034	-0.298441	-0.491382	-0.224601	-0.93474	-1.0948	-0.834199	0.645883	0.916509	0.868196
clust2	ENSG00000154274	0.910655	2.6826	1.35165	-0.761651	-0.740855	-0.217711	-0.952955	-0.143138	0.564158	0.0312432	-0.158166	-0.482205	-1.12269	-1.12269	-0.772178	1.02188	-0.431511	0.343569
clust2	ENSG00000146233	1.6437	1.87652	1.43678	-0.310388	-1.13669	-0.386659	-0.0193797	-0.474176	-0.723449	0.571888	-0.218701	-0.323381	-1.07322	-1.09853	-1.04771	1.56534	-0.152784	-0.129164
clust2	ENSG00000198881	2.05045	2.00047	1.44327	-0.949186	-0.949186	-0.501749	-0.539991	0.791546	-0.517974	-0.342844	0.318865	-0.0225227	-0.949186	-0.949186	-0.949186	0.623215	-0.32652	-0.230289
clust2	ENSG00000087995	1.62723	2.02183	2.07638	-0.545241	-0.720578	-1.07461	0.095381	0.0109926	-0.149448	-0.661389	-1.07222	-0.541057	-0.609835	-0.840259	-0.619059	0.439539	0.640191	-0.0778507
clust2	ENSG00000126249	1.50021	2.05212	2.03529	-0.898682	-0.490008	-0.771958	-0.00443189	0.0215118	-0.321027	-1.10235	-0.734279	-0.436939	-0.79455	-0.750604	-0.801755	0.658555	0.619709	0.219192
clust2	ENSG00000105202	1.50947	2.14234	2.12375	-0.240083	-0.484689	-0.452683	-0.366076	0.0122105	-0.435938	-1.03667	-1.12879	-0.725647	-0.812458	-0.543494	-0.699496	0.305361	0.557202	0.275689
clust2	ENSG00000077348	1.3266	2.27674	2.1619	-0.240772	-0.598868	-0.477926	-0.39307	-0.045552	-0.278513	-0.795542	-0.725166	-0.427109	-1.04876	-0.873171	-0.907638	0.486429	0.483462	0.0769466
clust2	ENSG00000130159	1.53969	2.07022	1.96419	-0.0574406	-0.36484	-0.417349	-0.214392	0.0306756	-0.0887289	-0.948479	-0.894486	-0.617923	-1.19072	-1.01782	-0.953693	0.559775	0.601619	-0.000300972
clust2	ENSG00000162373	1.49084	1.88326	1.98129	-0.0783502	-0.146673	-0.998944	-0.475055	-0.434581	-0.184359	-0.715096	-0.691497	-1.07926	-1.02463	-0.600234	-0.690558	1.23232	0.0108762	0.520659
clust2	ENSG00000104129	0.964431	2.13306	1.96188	-0.586072	-0.420628	-0.383678	-0.150103	0.254781	-0.0657324	-1.14046	-0.738307	-1.29738	-0.830928	-0.486133	-1.07687	0.914859	0.40092	0.546364
clust2	ENSG00000168913	1.21804	2.2609	2.10651	-0.600793	-0.472859	-0.930295	-0.533899	0.155742	-0.000239299	-0.940184	-0.544189	-0.739196	-1.05749	-0.765071	-0.422632	0.383934	0.263137	0.618579
clust2	ENSG00000187147	1.34948	2.03571	2.32031	-0.328463	-0.229132	-0.399771	-0.554597	0.0988047	-0.0106052	-1.04742	-0.673515	-0.785687	-0.85767	-0.872902	-0.962308	0.323189	0.032274	0.562292
clust2	ENSG00000253250	1.80843	2.04247	1.38379	0.14399	-0.633186	-0.378051	0.508497	0.137844	-0.277213	-0.57214	-0.407668	-0.886168	-1.51353	-0.686145	-1.33468	0.905472	0.0422092	-0.28392
clust2	ENSG00000133818	1.93165	1.86492	1.87691	-0.226885	-0.340142	-0.473148	0.125062	0.0550285	0.190796	-0.671597	-0.658052	-0.713693	-1.2731	-1.08526	-1.22381	0.255382	0.185956	0.179991
clust2	ENSG00000257093	1.81697	1.73729	1.7316	-0.371875	-0.503726	-0.291094	0.497695	0.0553904	0.546846	-0.351707	-0.632468	-0.522089	-1.42771	-1.44077	-1.26725	0.14426	-0.0598892	0.33852
clust2	ENSG00000007062	1.86061	1.32325	1.38844	-0.326724	-0.202635	-0.347617	0.352915	0.271762	0.327666	-0.741459	-0.774319	-0.654827	-1.47749	-1.46919	-1.45791	0.616024	0.668303	0.643217
clust2	ENSG00000184515	1.58677	1.69617	1.6472	0.0907553	-0.193391	-0.382347	0.312572	0.305838	-0.0150955	-0.767936	-0.182959	-0.335062	-1.5693	-1.5693	-1.5693	0.547706	0.253775	0.143903
clust2	ENSG00000130119	1.87348	1.88538	2.08388	-0.508847	-0.879814	-0.201233	-0.149097	-0.236901	-0.005292	-0.256725	-0.360143	-0.257364	-1.14901	-1.3439	-0.948257	-0.0641828	0.171337	0.346685
clust2	ENSG00000172671	1.98525	1.66579	2.06956	-0.508986	-1.01528	-0.131148	-0.155351	-0.1001	0.339894	-0.613637	-0.808045	-0.0676319	-0.941371	-1.13414	-1.05205	-0.166325	0.35159	0.281987
clust2	ENSG00000137513	1.70074	2.19761	1.89958	-0.42375	-0.654032	-0.359658	-0.648494	-0.40744	-0.208232	-0.425117	-0.5322	-0.536605	-1.01987	-0.967346	-0.965386	0.350151	0.398592	0.601456
clust2	ENSG00000156973	1.76289	2.04849	1.90107	-0.65622	-0.795927	-0.786678	-0.54859	-0.121352	-0.320483	-0.268005	-0.366977	-0.383258	-0.963569	-1.0314	-0.911821	0.262393	0.729415	0.450025
clust2	ENSG00000170633	1.94246	2.02063	1.88131	-0.590681	-1.0164	-0.81092	-0.438104	-0.306209	-0.456838	-0.475234	-0.470112	-0.58103	-0.565143	-0.768035	-0.794804	0.627595	0.523461	0.278049
clust2	ENSG00000101938	2.13189	1.94118	1.92259	-0.714944	-0.713607	-0.691157	-0.49937	-0.282409	-0.525861	-0.460703	-0.577911	-0.490319	-0.73799	-0.73799	-0.73799	0.437788	0.328593	0.408217
clust2	ENSG00000139146	2.01895	1.93023	1.96086	-0.710544	-0.747176	-0.767182	-0.396329	-0.554419	-0.358329	-0.377909	-0.42883	-0.375009	-0.847732	-0.796782	-0.850628	0.434078	0.42836	0.438394
clust2	ENSG00000103740	1.87804	1.63118	2.11165	-0.623592	-0.761848	-0.764286	-0.604978	-0.354307	-0.490233	-0.569819	-0.546684	-0.645322	-0.806265	-0.720189	-0.698497	0.490796	0.58969	0.884662
clust2	ENSG00000112130	2.13798	1.65897	1.76806	-0.776752	-0.851811	-0.893699	-0.781646	-0.241514	-0.142831	-0.550762	-0.555555	-0.520267	-0.575946	-0.797042	-0.800545	0.561995	0.665492	0.695867
clust2	ENSG00000146352	2.05912	1.28677	2.39137	-0.666103	-0.666103	-0.666103	-0.270202	-0.666103	-0.560713	-0.465044	-0.666103	-0.570181	-0.666103	-0.666103	-0.666103	0.193661	0.443786	0.820261
clust2	ENSG00000150625	1.89635	1.41673	2.05094	-0.661381	-0.711645	-0.532245	-0.677647	-0.242842	-0.372245	-0.618188	-0.738532	-0.314794	-0.852825	-0.909022	-0.848049	0.197849	0.704473	1.21307
clust2	ENSG00000186230	2.25433	1.79773	1.76545	-0.635866	-0.966515	-0.342288	-0.0175443	-0.548478	-0.0303151	-0.574264	-0.657097	-0.512295	-0.734787	-1.1488	-0.571775	0.158721	0.004935	0.75887
clust2	ENSG00000275004	1.95981	1.63784	2.02732	-0.712475	-0.906397	-0.610905	0.0904189	-0.656377	-0.34335	-1.04624	-0.260221	-0.48303	-0.696558	-0.771182	-0.772967	0.137942	0.588449	0.817916
clust2	ENSG00000178971	1.35048	1.62717	2.27272	-0.831634	-0.495093	-1.22834	0.278284	-0.286227	0.38507	-0.325142	-0.588529	-0.317769	-0.766179	-1.37151	-0.985481	0.459477	0.22663	0.596076
clust2	ENSG00000119685	1.9469	1.984	1.68719	-0.965519	-0.781962	-1.12248	-0.144259	-0.127659	-0.108488	-0.312552	-0.312959	-0.261763	-0.700666	-1.27059	-0.772848	0.281338	0.339819	0.642498
clust2	ENSG00000197283	2.12598	1.74916	1.67755	-1.00829	-0.880733	-1.0804	0.224997	-0.180913	0.421238	-0.23737	-0.51727	-0.412148	-0.920567	-1.06576	-0.763798	0.225373	0.13687	0.506077
clust2	ENSG00000109917	1.70344	1.74523	1.83675	-0.987912	-1.03061	-0.937614	0.00211982	0.21261	0.0961895	-0.435681	-0.424227	-0.354824	-1.05586	-1.03737	-1.01223	0.374299	0.611924	0.693764
clust2	ENSG00000151014	1.37768	1.94132	2.07659	-1.1664	-1.12253	-1.07254	0.0212544	0.201739	0.149109	-0.0665178	-0.53604	-0.00865629	-0.723926	-1.0162	-1.01242	0.257645	0.319027	0.380867
clust2	ENSG00000129596	1.92648	1.69349	1.51788	-0.827273	-0.848054	-0.460799	0.150681	-0.253365	-0.215444	-0.20507	-0.10721	-0.338094	-1.4302	-1.20014	-1.24578	0.477021	0.711106	0.654774
clust2	ENSG00000167085	2.00254	1.52433	1.63894	-0.714541	-0.79264	-0.802485	-0.213239	0.0943818	-0.136166	-0.18044	-0.376619	-0.329253	-1.25979	-1.13968	-1.28365	0.626352	0.757917	0.58405
clust2	ENSG00000064419	1.71942	1.90284	1.88013	-0.663682	-0.799149	-0.691833	-0.337027	-0.802214	-0.343375	-0.169883	-0.187284	-0.0746171	-0.846905	-1.18422	-1.12464	0.655696	0.499512	0.567247
clust2	ENSG00000166348	1.51588	1.90578	1.84749	-0.664093	-0.653491	-0.81187	-0.395625	-0.604141	-0.152545	-0.371325	-0.0670123	-0.0326127	-1.05324	-1.21789	-1.22791	0.657134	0.538525	0.786944
clust2	ENSG00000107815	1.22864	1.91494	1.95022	-0.606554	-0.726147	-0.875291	0.048556	-0.619096	-0.230453	-0.643454	-0.265731	-0.459673	-0.922907	-1.1818	-1.01796	0.813348	0.861939	0.731415
clust2	ENSG00000173473	1.23975	1.93574	2.09669	-0.957437	-0.738107	-0.817909	-0.18132	-0.557713	-0.149426	-0.288576	-0.282299	-0.300015	-0.944663	-1.15888	-0.952151	0.691471	0.585941	0.778917
clust2	ENSG00000105993	1.92462	1.90497	2.14605	-0.510445	-0.711152	-0.685534	0.0964916	-0.071169	0.150202	-0.727605	-0.766268	-0.648142	-0.853567	-0.816919	-0.886599	0.13355	0.157745	0.163765
clust2	ENSG00000115290	2.14085	2.18406	1.86192	-0.627998	-0.580312	-0.62291	0.0240548	-0.321084	-0.131654	-0.672649	-0.584008	-0.528949	-0.812199	-0.753819	-0.737153	0.292044	-0.0911256	-0.0390653
clust2	ENSG00000099954	1.45757	2.22129	2.28169	-0.38745	-0.476481	-0.471683	0.0261508	-0.0942456	0.0590855	-0.569599	-0.663527	-0.655477	-1.08004	-1.01191	-0.840658	0.165766	-0.0176556	0.0571668
clust2	ENSG00000127946	1.63478	2.122	2.17703	-0.367546	-0.379246	-0.30788	0.143931	-0.0830174	0.151917	-0.812367	-0.71761	-0.893218	-0.832436	-1.06426	-0.90566	0.101523	-0.109256	0.141327
clust2	ENSG00000081377	1.65018	2.24453	2.2514	-0.591419	-0.408618	-0.510559	-0.205688	-0.35956	-0.0235999	-0.64338	-0.730429	-0.726707	-0.662729	-0.825497	-0.746957	0.134228	-0.0575451	0.212337
clust2	ENSG00000141314	1.60782	2.33376	2.13994	-0.535881	-0.524173	-0.600434	-0.0635857	-0.314101	-0.193473	-0.678108	-0.702145	-0.66009	-0.746542	-0.746542	-0.746542	0.156995	-0.182864	0.455955
clust2	ENSG00000056487	1.70284	2.21465	2.21923	-0.591371	-0.651108	-0.687243	-0.0578638	-0.154566	-0.183918	-0.518817	-0.544438	-0.580152	-0.822807	-0.794261	-0.84801	0.153952	0.0568874	0.0869927
clust2	ENSG00000109956	1.83871	2.21651	2.22176	-0.496263	-0.401046	-0.573303	-0.140228	-0.175745	-0.208667	-0.624116	-0.607072	-0.65904	-0.747765	-0.763003	-0.763003	0.0728398	-0.114657	-0.0759153
clust2	ENSG00000141664	1.91598	1.92475	1.87996	-0.901024	-0.307317	-0.278892	0.258797	0.0336822	0.00759033	-0.815991	-0.820098	-0.69128	-1.18015	-1.11546	-0.566491	-0.0256391	0.216804	0.464772
clust2	ENSG00000100078	1.90714	1.77124	2.10802	-0.869727	-0.837809	-0.869727	0.435488	0.318097	0.0972341	-0.869727	-0.869727	-0.842625	-0.60114	-0.663151	-0.469052	0.0722804	0.0728705	0.110315
clust2	ENSG00000165185	1.74476	2.04597	2.11733	-0.749601	-0.518738	-0.58038	0.302442	0.0499833	0.222916	-0.748426	-0.957754	-1.08287	-0.707032	-0.654141	-0.595231	0.153448	-0.117827	0.0751479
clust2	ENSG00000078725	2.24202	1.83256	1.77473	-0.793616	-0.69139	-0.663398	0.341892	0.512008	0.185493	-0.635442	-0.397993	-0.561921	-0.91331	-0.931847	-0.931847	-0.141491	-0.0440029	-0.182449
clust2	ENSG00000175445	2.01264	1.92732	1.86237	-0.791808	-0.658845	-0.772217	0.396069	0.410712	0.333216	-0.69077	-0.810774	-0.776958	-0.810774	-0.764713	-0.810774	-0.143967	0.115359	-0.0260773
clust2	ENSG00000135605	1.78314	1.99299	2.12683	-0.699375	-0.924724	-0.582154	0.244986	0.118266	0.442676	-0.329645	-0.378313	-0.476571	-0.902184	-1.01096	-0.971064	-0.320201	-0.10717	-0.00652692
clust2	ENSG00000204065	1.82096	2.20977	1.96651	-0.577404	-0.871081	-0.871081	0.146947	0.142387	0.257215	-0.472634	-0.540936	-0.33334	-0.871081	-0.871081	-0.871081	0.0211141	-0.0194863	-0.2657
clust2	ENSG00000161653	1.81983	1.98537	2.32778	-0.325035	-0.312728	-0.87626	0.270124	-0.0702679	-0.101391	-0.444545	-0.687652	-0.697917	-0.485172	-0.786259	-0.945585	-0.116427	0.0363454	-0.590205
clust2	ENSG00000002746	1.62574	2.46109	2.01426	-0.69	-0.707867	-0.708509	0.208246	0.117324	-0.0205002	-0.603822	-0.590874	-0.676937	-0.660259	-0.728048	-0.709542	-0.220502	0.0156817	-0.125487
clust2	ENSG00000105143	1.56856	2.3447	2.22354	-0.635249	-0.679428	-0.679428	-0.0213576	0.0384457	-0.0744137	-0.637758	-0.659182	-0.679428	-0.679428	-0.679428	-0.679428	-0.232308	0.14724	0.0143414
clust2	ENSG00000128242	1.42214	2.34867	2.39713	-0.67336	-0.67336	-0.505148	0.087395	0.162404	-0.152174	-0.517992	-0.611462	-0.553786	-0.67336	-0.67336	-0.64015	-0.0727475	-0.340631	-0.330208
clust2	ENSG00000019505	1.707	2.1915	2.35063	-0.69612	-0.569029	-0.69612	0.0508707	0.02676	-0.0249253	-0.433638	-0.497568	-0.633227	-0.69612	-0.69612	-0.69612	-0.154181	-0.314971	-0.218624
clust2	ENSG00000173175	1.65514	2.38393	2.25181	-0.544831	-0.592176	-0.639464	0.00128348	-0.00907176	-0.0165326	-0.558543	-0.522373	-0.50988	-0.605358	-0.68809	-0.667622	-0.254618	-0.444197	-0.239416
clust2	ENSG00000100473	1.96346	2.07088	2.18865	-0.539562	-0.744208	-0.718713	-0.0444143	0.100429	0.111395	-0.709517	-0.632017	-0.665709	-0.752569	-0.446751	-0.551881	0.08627	-0.358037	-0.3577
clust2	ENSG00000123560	1.8182	2.20043	2.13865	-0.717221	-0.66541	-0.618898	-0.00512242	0.300874	0.166056	-0.552459	-0.650659	-0.673168	-0.717221	-0.717221	-0.693185	-0.156889	-0.22051	-0.236249
clust2	ENSG00000140832	1.69488	2.0869	2.16538	-0.631043	-0.641014	-0.645014	0.322912	0.572696	0.23097	-0.754011	-0.582095	-0.706916	-0.771103	-0.726916	-0.771103	-0.218757	-0.266941	-0.358833
clust2	ENSG00000177614	1.78082	2.05943	2.1474	-0.538743	-0.671804	-0.613292	0.307585	0.336803	0.306354	-0.687517	-0.672584	-0.722288	-0.790611	-0.802202	-0.809637	-0.341806	-0.0269459	-0.260962
clust2	ENSG00000121570	1.78788	1.89135	1.93354	-0.844215	-0.862285	-0.773389	0.25243	0.201524	0.274388	-0.399463	-0.407036	-0.380151	-1.06289	-1.12876	-1.11625	0.206975	0.226535	0.199819
clust2	ENSG00000133401	1.65906	1.92267	2.02438	-0.811253	-0.787641	-0.728972	0.218277	0.0270826	0.267415	-0.552678	-0.50277	-0.455838	-1.1242	-1.02826	-1.05146	0.247287	0.197091	0.479816
clust2	ENSG00000120162	1.25701	2.06695	2.16602	-0.756647	-0.734452	-0.857371	0.397972	0.356112	0.334867	-0.433073	-0.534533	-0.650454	-1.08667	-0.990203	-1.01787	0.127143	0.0386714	0.316526
clust2	ENSG00000155961	1.46877	2.0805	2.18566	-0.70878	-0.622338	-0.683961	0.226736	0.311093	0.341575	-0.430109	-0.721475	-0.530002	-1.05902	-1.02443	-0.973225	0.0163656	0.0263662	0.0962726
clust2	ENSG00000160049	1.26654	2.15702	2.31738	-0.627302	-0.726377	-0.877326	-0.0620432	0.078292	-0.0172683	-0.380273	-0.290112	-0.226368	-1.14421	-0.99348	-1.00026	0.148395	0.218842	0.15855
clust2	ENSG00000105607	1.28739	2.35494	2.18367	-0.587698	-0.543118	-0.640016	-0.0972248	-0.139472	0.0250077	-0.225293	-0.321848	-0.234847	-1.14743	-0.984613	-1.17336	0.126959	0.22227	-0.105331
clust2	ENSG00000179361	1.40983	2.28096	2.27296	-0.565778	-0.604732	-0.45225	-0.152651	-0.21117	-0.0984338	-0.379543	-0.382015	-0.449288	-1.04026	-1.04262	-0.978591	0.131214	0.0811782	0.181186
clust2	ENSG00000088899	0.974029	2.24232	2.26474	-0.743271	-0.954027	-0.684976	0.162742	0.209032	0.314515	-0.236248	-0.219997	-0.37805	-1.18856	-1.07941	-0.967037	0.0301313	0.121313	0.132753
clust2	ENSG00000105357	1.10005	2.31955	2.4076	-0.737072	-0.768273	-0.779217	0.107299	0.286138	0.145548	-0.251955	-0.378692	-0.385649	-0.875071	-0.875071	-0.875071	-0.140897	-0.291571	-0.00764388
clust2	ENSG00000058453	1.45921	2.18399	2.27154	-0.48901	-0.726242	-0.605985	0.140094	0.418037	0.189592	-0.696838	-0.8172	-0.744181	-0.796171	-0.917581	-0.53184	0.0906701	-0.288589	-0.139503
clust2	ENSG00000182674	1.28193	1.99441	2.55557	-0.563693	-0.551124	-0.707766	0.046391	0.267007	0.32569	-0.784439	-0.784439	-0.585921	-0.784439	-0.784439	-0.784439	-0.0281436	-0.299987	0.187831
clust2	ENSG00000165238	1.04761	2.29194	2.26181	-0.704571	-0.811456	-0.793166	0.160882	0.181319	0.141041	-0.722874	-0.623338	-0.696954	-0.838254	-0.838254	-0.819769	0.287007	0.219368	0.257656
clust2	ENSG00000182175	1.21491	2.37585	2.18319	-0.811205	-0.664532	-0.800097	-0.0988432	0.275555	0.129435	-0.701247	-0.569538	-0.557677	-0.84183	-0.833428	-0.802289	0.0765958	0.197277	0.227882
clust2	ENSG00000015133	1.36605	2.17689	2.23141	-0.814548	-0.824512	-0.879913	0.143505	0.157228	0.233687	-0.663025	-0.790142	-0.69628	-0.752149	-0.760489	-0.639429	0.180962	0.0972537	0.233505
clust2	ENSG00000179761	1.664	2.12566	2.16629	-0.714396	-0.718912	-0.73392	-0.0631814	0.0443504	0.116774	-0.808682	-0.63072	-0.777932	-0.717341	-0.793292	-0.717931	0.0955739	0.204101	0.259558
clust2	ENSG00000159685	0.841517	2.47446	2.27172	-0.394315	-0.541017	-0.98895	-0.183646	0.191945	-0.114555	-0.296747	-0.757261	-0.590047	-1.02566	-0.762949	-0.821023	0.343841	0.170234	0.182466
clust2	ENSG00000167105	0.832826	2.4171	2.2869	-0.638082	-0.617339	-1.11993	0.352356	0.343775	-0.0145561	-0.687668	-0.376786	-0.627209	-0.809541	-0.924705	-0.557683	-0.0852584	-0.0952221	0.321021
clust2	ENSG00000118242	2.05094	1.90016	1.99548	-0.643249	-1.03588	-0.627632	-0.165254	0.0977775	-0.222896	-0.155943	-0.758332	-0.728847	-0.692749	-0.891792	-0.808192	0.223834	0.325493	0.137076
clust2	ENSG00000091073	1.45803	2.279	2.24122	-0.755882	-0.644261	-0.847538	-0.353935	-0.144171	-0.227747	-0.331653	-0.689116	-0.479112	-0.322795	-0.889674	-0.850077	-0.0171836	0.566952	0.00794291
clust2	ENSG00000196391	1.4879	2.37279	2.06117	-0.684394	-1.08222	-0.902319	-0.324302	-0.169989	-0.383204	-0.0252393	-0.272192	-0.495125	-0.378094	-0.982587	-0.758961	0.230276	0.338411	-0.0319247
clust2	ENSG00000145248	1.28566	1.96694	2.53589	-0.51393	-0.7623	-0.503628	0.168156	-0.245402	-0.43851	-0.459638	-0.78844	-0.711494	-0.483693	-0.955987	-0.955987	0.391839	0.272038	0.19849
clust2	ENSG00000170468	1.47715	2.40362	2.01711	-0.397151	-1.02526	-0.616744	-0.205407	-0.158783	0.027337	-0.81067	-0.762042	-0.363549	-0.641446	-0.796881	-0.839747	0.0830348	0.31472	0.294713
clust2	ENSG00000196378	1.22956	2.31291	2.34725	-0.363781	-1.02477	-0.400844	-0.286163	0.118103	-0.0403988	-0.504483	-0.482421	-0.652196	-0.444113	-1.00251	-0.948055	-0.192621	0.369401	-0.0348669
clust2	ENSG00000119772	1.07814	2.0593	2.26397	-0.554961	-0.747532	-0.636524	0.13334	-0.242481	0.218266	-0.797049	-1.05599	-0.753669	-0.724871	-1.07478	-0.612173	0.508588	0.43433	0.504099
clust2	ENSG00000130052	0.829723	2.04702	2.19358	-0.673351	-0.799307	-0.758353	0.182836	-0.0946513	0.035411	-0.757408	-0.467517	-0.94446	-0.944754	-0.952384	-0.88873	0.652373	0.643523	0.696446
clust2	ENSG00000170561	1.13246	2.06401	2.17098	-0.769126	-0.727378	-0.717317	0.129099	0.0430696	-0.0552662	-0.840817	-0.710062	-0.829294	-0.860752	-0.85164	-0.872595	0.560973	0.52368	0.609983
clust2	ENSG00000138135	0.89755	2.08248	2.39229	-0.781547	-0.781547	-0.781547	-0.0716226	0.0553059	0.342719	-0.781547	-0.781547	-0.781547	-0.718832	-0.781547	-0.781547	0.350573	0.290797	0.631119
clust2	ENSG00000143502	0.811941	2.32688	2.14047	-0.85858	-0.85858	-0.85858	0.246855	-0.0402454	0.259449	-0.721366	-0.526965	-0.628071	-0.85858	-0.85858	-0.85858	0.261544	0.440604	0.580384
clust2	ENSG00000177380	0.667001	2.35921	2.2746	-0.551877	-1.03362	-0.637058	0.0441172	-0.0103129	0.00773348	-0.48208	-0.319174	-0.453999	-0.959238	-1.11493	-0.905721	0.178852	0.326631	0.609867
clust2	ENSG00000065882	0.80393	2.27142	2.42356	-0.748718	-0.674017	-0.804334	-0.00870861	-0.108217	-0.0624144	-0.629309	-0.482056	-0.493789	-0.955351	-0.884811	-0.787157	0.469337	0.262413	0.408228
clust2	ENSG00000124228	1.20759	2.17013	2.20445	-0.639588	-0.63792	-0.817736	-0.227479	-0.0439502	-0.11878	-0.775622	-0.568265	-0.364718	-0.905328	-0.897342	-1.02213	0.495577	0.42261	0.518502
clust2	ENSG00000116670	1.15984	2.30157	2.18855	-0.613797	-0.691029	-0.58801	-0.185663	-0.000733336	-0.175414	-0.685726	-0.453191	-0.646249	-1.03781	-0.843059	-0.951306	0.462853	0.463659	0.29552
clust2	ENSG00000175029	1.16058	2.24345	2.23657	-0.828134	-0.765563	-0.690472	-0.0249156	0.0313138	0.00962529	-0.651056	-0.545178	-0.6119	-0.964222	-0.792835	-0.901461	0.342708	0.399269	0.352214
clust2	ENSG00000101290	0.857544	2.03883	2.24979	-1.10827	-1.24449	-0.915798	0.239798	-0.124205	0.386445	-0.203263	-0.348528	-0.340885	-0.888035	-1.03152	-0.768109	0.337782	0.420774	0.442142
clust2	ENSG00000156515	0.887264	2.22106	2.23462	-1.10038	-1.12468	-1.17714	0.111474	0.0077443	0.119892	-0.407726	-0.367276	-0.404741	-0.70531	-0.740356	-0.678436	0.356964	0.331206	0.435833
clust2	ENSG00000173065	1.01576	2.22098	2.30084	-1.11369	-1.03217	-1.02491	0.0150891	-0.0973377	0.0502496	-0.223674	-0.434145	-0.339761	-0.829506	-0.807195	-0.626791	0.297366	0.297318	0.331568
clust2	ENSG00000164591	1.03575	2.04294	2.14406	-0.861882	-1.05526	-0.962631	0.405985	0.209459	0.335862	-0.593788	-0.566315	-0.531332	-1.11279	-0.803465	-0.859728	0.487289	0.363109	0.322734
clust2	ENSG00000050344	1.33172	2.14328	2.19429	-1.04947	-1.00194	-0.990686	0.195363	0.1693	0.155098	-0.528701	-0.437569	-0.54271	-0.699665	-0.721568	-0.83859	0.119109	0.353477	0.149267
clust2	ENSG00000174574	1.41188	2.00032	2.09785	-1.00168	-1.19794	-1.16884	0.214009	0.0663685	0.379813	-0.386128	-0.607851	-0.42886	-0.670826	-0.756923	-0.799678	0.273246	0.27696	0.298293
clust2	ENSG00000172269	1.50683	2.08148	1.93728	-0.95842	-0.685911	-0.796728	0.0505929	-0.0170777	0.083772	-0.575609	-0.60632	-0.806325	-1.01202	-0.989763	-0.675545	0.70989	0.297069	0.456802
clust2	ENSG00000073849	1.45932	2.0437	2.08013	-1.00683	-0.92218	-0.971603	-0.0845032	-0.0802925	0.00124122	-0.385921	-0.420719	-0.423222	-0.972	-0.832791	-0.860429	0.577085	0.332181	0.466843
clust2	ENSG00000105605	1.26433	2.134	2.15926	-0.881301	-0.85683	-0.927232	-0.0964707	0.113642	0.106387	-0.431131	-0.582704	-0.598544	-0.86832	-0.843597	-0.948986	0.462712	0.421416	0.373371
clust2	ENSG00000127152	1.23401	2.2501	1.82263	-0.812199	-1.02581	-0.927747	0.01279	0.0581728	-0.234988	-0.194845	-0.629311	-0.577321	-0.912727	-0.91299	-0.963835	0.602766	0.583252	0.628056
clust2	ENSG00000003249	1.14976	2.01333	1.99137	-0.941992	-0.959479	-0.938359	-0.0964769	-0.0861297	-0.112234	-0.530204	-0.590112	-0.544108	-0.935679	-0.843395	-0.844368	0.785217	0.736471	0.746394
clust2	ENSG00000188322	1.37168	1.95231	1.99536	-0.94957	-0.956853	-0.991019	0.0499315	0.111445	-0.0156001	-0.617839	-0.565398	-0.518919	-0.893728	-0.943956	-0.856929	0.585982	0.630086	0.613018
clust2	ENSG00000121653	0.880846	2.10953	2.0729	-0.773586	-0.999286	-1.03304	0.0775967	0.215451	0.0584197	-0.442865	-0.859964	-0.684651	-0.889064	-0.787135	-0.851622	0.662192	0.573389	0.670896
clust2	ENSG00000175093	1.10084	1.95938	1.90097	-0.923139	-0.940232	-0.883016	0.266835	0.343582	0.190735	-0.741857	-0.606652	-0.694283	-0.982251	-0.982251	-0.982251	0.673847	0.658176	0.641571
clust2	ENSG00000129682	1.24966	2.04587	2.03912	-0.878776	-0.89808	-0.864786	0.146517	0.243143	0.268747	-0.691748	-0.714778	-0.680183	-0.905071	-0.905071	-0.905071	0.461769	0.537585	0.45115
clust2	ENSG00000237515	1.24313	1.98371	2.07634	-0.872092	-0.880228	-0.889434	0.211389	0.0453054	0.192517	-0.73409	-0.642516	-0.741238	-0.881654	-0.889434	-0.889434	0.507535	0.638495	0.521693
clust2	ENSG00000134815	1.21241	2.04645	1.9793	-0.326078	-0.564276	-0.624991	-0.564982	-0.668205	-0.529803	-0.064926	-0.310847	0.288758	-1.21386	-1.29287	-1.04694	0.440099	0.325407	0.91535
clust2	ENSG00000001497	1.3377	2.066	2.16875	-0.518491	-0.300855	-0.423362	-0.640649	-0.623288	-0.474447	-0.239125	-0.280254	-0.270049	-1.144	-1.20989	-0.949078	0.51319	0.640342	0.347511
clust2	ENSG00000110400	1.25074	2.09488	2.06586	-0.494996	-0.532941	-0.33661	-0.356412	-0.367647	-0.306477	-0.17258	-0.232213	-0.267677	-1.204	-1.36037	-1.26085	0.443159	0.506666	0.531467
clust2	ENSG00000163362	1.16185	2.14364	2.09278	-0.559648	-0.65544	-0.519707	-0.426875	-0.500008	-0.187045	-0.10194	-0.254251	-0.259505	-1.22987	-1.19414	-1.11584	0.46714	0.603483	0.535373
clust2	ENSG00000084774	0.197528	2.2579	2.24402	-0.461702	-0.370034	-0.332553	-0.508522	-0.691676	-0.332512	0.0779306	0.0247203	0.120838	-1.09287	-1.48875	-1.13228	0.500956	0.310681	0.67632
clust2	ENSG00000130305	0.466991	2.26258	2.31982	-0.175429	-0.472384	-0.378757	-0.514807	-0.135669	-0.643479	-0.182597	0.065794	0.282931	-1.49237	-1.13472	-1.13594	0.372102	0.216836	0.279094
clust2	ENSG00000181026	0.749989	2.03551	1.99023	-0.911321	-1.15963	-1.11635	-0.291339	-0.507827	-0.159329	0.29618	0.173814	0.414661	-0.958844	-1.12797	-1.07545	0.532135	0.55647	0.559074
clust2	ENSG00000125166	1.08543	1.94489	2.01229	-0.754393	-0.785863	-0.811067	-0.539338	-0.458759	-0.441229	-0.167362	-0.0557669	-0.202011	-0.97592	-1.1142	-1.12923	0.783564	0.79883	0.810137
clust2	ENSG00000148843	0.417213	2.06814	2.12102	-0.690363	-0.829385	-0.869041	-0.252364	-0.439865	-0.222538	-0.0190352	-0.193275	-0.0903367	-0.965013	-1.34409	-1.06956	0.757191	0.746364	0.874949
clust2	ENSG00000102977	0.458205	2.05284	2.14799	-0.817211	-0.711413	-0.302583	-0.495541	-0.550303	-0.908397	-0.32238	-0.00410293	-0.0638011	-0.996331	-0.784779	-1.21321	0.897836	0.68987	0.923314
clust2	ENSG00000164061	0.28299	1.9609	2.48538	-0.581352	-0.875658	-0.4132	-0.174718	-0.420053	-0.0227891	-0.208762	-0.34245	-0.330904	-1.16164	-1.03715	-1.06616	0.935937	0.140968	0.828673
clust2	ENSG00000102572	0.518276	2.23938	2.4604	-0.495109	-0.525212	-0.603969	-0.350017	-0.337147	-0.419746	-0.387808	-0.391856	-0.31046	-0.917467	-1.0525	-1.05896	0.491026	0.596967	0.544206
clust2	ENSG00000167393	0.681087	2.31205	2.27824	-0.276232	-0.55461	-0.535508	-0.271241	-0.345194	-0.593558	-0.191953	-0.309888	-0.124844	-1.25174	-1.18733	-1.00069	0.381637	0.388686	0.601088
clust2	ENSG00000099365	0.857633	2.2618	2.2121	-0.667184	-0.554977	-0.718769	-0.153408	0.0619555	-0.323601	-0.310869	-0.22614	-0.31887	-1.12585	-1.19648	-1.09074	0.755138	0.277298	0.26096
clust2	ENSG00000127585	0.51609	2.31985	2.22699	-0.487204	-0.893952	-0.499384	-0.279255	-0.272317	-0.242682	-0.348794	-0.40337	-0.102312	-0.979536	-1.00313	-1.25903	0.794994	0.478381	0.434665
clust2	ENSG00000103423	0.693455	2.48016	2.54939	-0.832192	-0.683248	-0.594718	-0.462194	-0.458416	-0.460777	-0.309997	-0.515727	-0.205131	-0.731591	-0.524103	-0.568877	0.337085	0.0273893	0.259492
clust2	ENSG00000116983	0.514246	2.61978	2.60364	-0.623211	-0.58451	-0.620222	-0.17108	-0.26856	-0.480563	-0.464839	-0.447746	-0.146371	-0.71894	-0.523671	-0.597621	0.156063	-0.175045	-0.0713485
clust2	ENSG00000105287	0.84646	2.51499	2.39163	-0.636275	-0.790024	-0.887657	-0.161762	-0.0831776	-0.243153	-0.389303	-0.39261	-0.220275	-0.875181	-0.737501	-0.742594	0.306038	-0.0367451	0.137146
clust2	ENSG00000092377	0.759468	2.48058	2.55183	-0.715956	-0.715956	-0.715956	-0.147012	-0.350677	-0.419843	-0.103406	-0.196322	-0.402871	-0.715956	-0.715956	-0.715956	0.345279	-0.167353	-0.0539392
clust2	ENSG00000141510	0.863416	2.42051	2.47983	-0.972695	-0.904605	-0.778256	-0.144011	-0.254551	-0.270622	-0.158869	-0.336855	-0.346587	-0.660243	-0.701723	-0.673652	0.172698	0.207032	0.0591771
clust2	ENSG00000167257	0.896508	2.50352	2.4583	-0.672495	-0.685765	-0.975162	-0.17621	-0.391815	-0.277083	-0.181769	-0.57231	-0.351375	-0.484567	-0.757275	-0.620024	-0.0792203	0.19657	0.170174
clust2	ENSG00000181192	0.785241	2.46303	2.46193	-0.641664	-1.04646	-0.838099	-0.0820762	-0.410722	-0.0983467	-0.517202	-0.47466	-0.517302	-0.553435	-0.652655	-0.490224	0.22274	0.157152	0.232745
clust2	ENSG00000183307	0.89565	2.27355	2.41454	-0.782994	-0.565886	-0.664458	-0.696597	-0.305499	-0.381034	-0.642858	-0.422139	-0.354073	-0.479768	-0.706953	-0.930863	0.106028	0.658424	0.58493
clust2	ENSG00000170537	0.623075	2.556	2.32589	-0.535138	-0.739925	-0.710304	-0.599885	-0.535859	-0.336859	-0.301096	-0.29199	-0.0717594	-0.584489	-0.867232	-0.952391	0.215235	0.494067	0.312662
clust2	ENSG00000230707	0.490644	2.3755	2.63882	-0.577806	-0.57071	-0.574798	-0.474771	-0.370477	-0.462534	-0.472524	-0.479612	-0.282139	-0.702473	-0.702473	-0.702473	0.00137487	0.747569	0.118876
clust2	ENSG00000117407	1.2113	2.49498	2.33111	-0.649232	-0.644057	-0.647039	-0.49615	-0.000256486	-0.523719	-0.53266	-0.427917	-0.468553	-0.580651	-0.665367	-0.651854	-0.223691	0.087014	0.386747
clust2	ENSG00000132623	1.23205	2.5086	2.19719	-0.653143	-0.583444	-0.642169	-0.604422	-0.301454	-0.42113	-0.412223	-0.0300565	-0.0893963	-0.700662	-1.00054	-0.882334	-0.0155689	0.100948	0.297762
clust2	ENSG00000112137	1.03915	2.23706	2.51638	-0.495471	-0.614762	-0.670854	-0.156806	-0.300332	-0.0664174	-0.506248	-0.545742	-0.435488	-0.954276	-0.937097	-0.82216	0.167361	0.220543	0.325158
clust2	ENSG00000164742	1.19139	2.28044	2.49425	-0.437358	-0.461584	-0.504663	-0.167965	-0.293737	-0.251003	-0.653016	-0.613773	-0.641584	-0.819864	-0.810317	-0.825624	0.213968	0.206107	0.0943311
clust2	ENSG00000130940	0.869707	2.34352	2.70609	-0.502368	-0.645116	-0.608989	-0.449292	-0.354505	-0.283747	-0.413811	-0.552542	-0.555049	-0.604554	-0.597816	-0.631974	0.185211	-0.0854564	0.180692
clust2	ENSG00000196338	0.897829	2.49785	2.50135	-0.604542	-0.744022	-0.657007	-0.44171	-0.292711	-0.445054	-0.445886	-0.45076	-0.402013	-0.641544	-0.629604	-0.640378	0.19275	0.114792	0.190663
clust2	ENSG00000078549	1.10203	2.39842	2.42371	-0.56603	-0.588504	-0.62852	-0.449788	-0.440489	-0.519522	-0.581127	-0.582631	-0.60577	-0.62852	-0.577151	-0.62852	0.347355	0.312098	0.212957
clust2	ENSG00000179314	0.985542	2.45445	2.42256	-0.695648	-0.683527	-0.675572	-0.232768	-0.201661	-0.240415	-0.571836	-0.553835	-0.579172	-0.708148	-0.726077	-0.64315	0.287022	0.0918538	0.270377
clust2	ENSG00000184828	0.842974	1.98043	2.68036	-0.776426	-0.369185	-0.776426	-0.0656025	-0.0700585	-0.648828	0.05801	-0.658297	-0.545012	-0.776426	-0.776426	-0.776426	0.691455	0.434715	-0.448832
clust2	ENSG00000106290	0.504992	2.34961	2.54228	-0.562277	-0.609948	-0.558195	-0.219872	-0.630654	0.0407047	-0.198138	-0.348418	-0.288888	-0.730297	-1.30184	-0.787748	0.192335	0.308419	0.29794
clust2	ENSG00000125834	0.762422	2.3425	2.32019	-0.600561	-0.773318	-0.768157	-0.240248	-0.507864	-0.147217	-0.0948563	-0.444108	-0.113374	-0.934212	-1.02128	-1.00387	0.389976	0.318136	0.515842
clust2	ENSG00000197362	0.502142	2.11337	2.48548	-1.08084	-0.624918	-0.782881	-0.0736554	-0.300021	0.12454	-0.406252	-0.276614	-0.590929	-0.713635	-1.19942	-0.686831	0.462195	0.67887	0.369388
clust2	ENSG00000113248	0.593696	2.26636	2.40295	-0.763424	-1.00441	-1.15022	-0.285237	-0.323202	-0.0531016	-0.00604215	-0.358431	-0.53303	-0.788044	-0.592897	-0.756685	0.240897	0.576766	0.534049
clust2	ENSG00000137274	0.786452	2.36522	2.40181	-0.862516	-0.790174	-1.2144	-0.260805	-0.162034	-0.212753	-0.193922	-0.211452	-0.460359	-0.83028	-0.617737	-0.630406	0.361911	0.289078	0.242362
clust2	ENSG00000077312	0.495959	2.24704	2.25973	-0.840356	-0.537012	-0.645276	-0.756994	-0.432099	-0.883883	-0.907853	-0.561117	-0.624525	-0.491365	-0.316009	-0.250919	0.703156	0.894406	0.647113
clust2	ENSG00000090932	0.838816	2.39396	2.29087	-0.630292	-0.728167	-0.599016	-0.834491	-0.283686	-0.592961	-0.651789	-0.64301	-0.571799	-0.536266	-0.573587	-0.480568	0.44592	0.684405	0.471664
clust2	ENSG00000237190	0.87086	2.27913	2.34613	-0.810679	-0.770771	-0.622814	-0.82575	-0.337606	-0.744301	-0.745542	-0.398319	-0.80506	-0.25151	-0.305648	-0.446057	0.514753	0.615996	0.437185
clust2	ENSG00000134955	0.430835	1.89278	2.63557	-0.629087	-0.108887	-0.618126	-0.846922	-0.754129	-0.733469	-0.562061	-0.899331	-0.586588	-0.458761	-0.392456	-0.500471	0.538344	0.918631	0.674128
clust2	ENSG00000173404	0.493798	1.70394	2.47999	-0.647913	-0.647913	-0.647913	-0.60376	-0.647913	-0.46738	-0.647913	-0.647913	-0.647913	-0.647913	-0.647913	-0.647913	0.62026	1.14066	1.11163
clust2	ENSG00000135824	1.02071	2.27059	2.28332	-0.51107	-0.634563	-0.508026	-0.634563	-0.634563	-0.634563	-0.634563	-0.634563	-0.523736	-0.634563	-0.634563	-0.634563	0.656075	0.841396	0.18181
clust2	ENSG00000154217	1.28346	2.08079	2.20253	-0.493428	-0.404817	-0.350244	-0.505071	-0.511051	-0.520406	-0.521458	-0.603788	-0.748434	-0.921794	-0.960637	-0.862225	0.698265	0.627303	0.511008
clust2	ENSG00000187555	0.983064	2.13657	2.21305	-0.540974	-0.502645	-0.475493	-0.503102	-0.594626	-0.399215	-0.717169	-0.680243	-0.865218	-0.656646	-0.800139	-0.793031	0.717068	0.733236	0.745509
clust2	ENSG00000166133	1.36129	2.16618	1.84989	-0.895077	-0.605475	-0.626375	-0.60157	-0.247061	-0.68637	-0.904019	-0.527427	-0.291504	-0.509984	-0.677519	-0.979092	0.687801	1.01014	0.476175
clust2	ENSG00000132591	0.820756	2.18303	2.04429	-0.371271	-0.696812	-0.818225	-0.595983	-0.301121	-0.500766	-0.839706	-0.863246	-0.629299	-0.771843	-0.305934	-0.842476	0.786164	1.05057	0.651881
clust2	ENSG00000115425	1.20649	1.85566	2.15852	-0.40038	-0.404453	-0.699822	-0.67862	-0.434521	-0.505498	-0.832466	-0.994127	-0.546957	-0.727355	-0.866342	-0.593523	0.734077	1.06055	0.668763
clust2	ENSG00000120158	1.34065	2.25924	1.817	-0.244287	-0.546931	-0.894527	-0.792813	-0.471242	-0.550333	-0.763691	-0.648393	-0.775704	-0.621459	-0.671905	-0.639281	0.682223	0.831446	0.69001
clust2	ENSG00000133316	1.19135	2.20994	1.9758	-0.639084	-0.529891	-0.752116	-0.734252	-0.349958	-0.279184	-0.744995	-0.616899	-0.817526	-0.69832	-0.580105	-0.843657	0.705396	0.876125	0.627382
clust2	ENSG00000182810	0.993346	2.18366	1.85324	-0.34369	-0.799798	-0.420361	-0.454313	-1.35098	-0.372979	-0.669378	-0.653496	-0.799863	-0.631155	-0.505755	-0.546542	0.870596	1.07118	0.576291
clust2	ENSG00000126453	1.41514	1.95495	1.91869	-0.614288	-0.662695	-0.604852	-0.413323	-0.611151	-0.8348	-0.465035	-0.66857	-0.512027	-1.14246	-0.338228	-0.861012	0.802176	0.814015	0.823472
clust2	ENSG00000137700	1.10936	2.37368	1.85972	-0.5102	-0.49505	-0.777294	-0.671247	-0.855464	-0.610095	-0.524992	-0.491009	-0.490311	-0.874998	-0.452272	-0.78693	0.925295	0.616433	0.655365
clust2	ENSG00000204624	1.20828	2.05842	1.71894	-0.687078	-0.615804	-0.620989	-0.693397	-0.693963	-0.719602	-0.722339	-0.666717	-0.668638	-0.72544	-0.602363	-0.570034	1.0028	0.965641	1.03228
clust2	ENSG00000213390	1.52464	1.73234	1.86815	-0.676429	-0.36415	-0.60291	-0.608555	-0.698902	-0.864202	-0.841343	-0.551915	-0.726585	-0.735533	-0.795171	-0.486649	0.985587	0.981969	0.85966
clust2	ENSG00000156304	1.04904	1.96029	2.18656	-0.562007	-0.648595	-0.344627	-0.690246	-0.861272	-0.709005	-0.658609	-0.678485	-0.674382	-0.46902	-0.794922	-0.611412	0.812144	0.725651	0.968891
clust2	ENSG00000189143	1.35452	1.91888	2.17683	-0.610168	-0.753927	-0.437532	-0.564648	-0.726895	-0.633868	-0.839657	-0.864613	-0.717388	-0.614377	-0.383598	-0.497208	0.821628	0.622401	0.749612
clust2	ENSG00000197696	0.627647	2.09274	2.12841	-0.728164	-0.83051	-0.843284	-0.701146	-0.359789	-1.11732	-0.130434	0.0416335	-0.389146	-0.337509	0.15534	-1.47105	0.504943	1.03026	0.327375
clust2	ENSG00000077279	1.11683	2.1958	2.15397	-0.811307	-0.811307	-0.811307	-0.691131	-0.530354	-0.489323	-0.131687	-0.490345	-0.284047	-0.811307	-0.70568	-0.735904	0.818891	0.293045	0.725166
clust2	ENSG00000160877	0.663448	2.27979	2.32144	-0.98189	-0.865177	-0.8179	-0.743853	-0.532728	-0.576516	-0.0903013	-0.110518	-0.183085	-0.732605	-0.756041	-0.552029	0.576611	0.46036	0.640993
clust2	ENSG00000138162	0.913661	2.29386	2.58268	-0.6405	-0.449159	-0.768247	-0.540245	-0.547677	-0.668544	-0.198864	-0.276582	-0.301414	-0.636343	-0.738744	-0.781127	0.28502	0.110009	0.362223
clust2	ENSG00000158125	0.71525	2.56334	2.21474	-0.585721	-0.732737	-0.57919	-0.430708	-0.605002	-0.515795	-0.0383208	-0.374128	-0.479158	-0.787514	-0.761044	-0.859313	0.718789	0.196865	0.339637
clust2	ENSG00000256269	1.24001	2.2685	2.27026	-0.99727	-0.895856	-0.837469	-0.446859	-0.457096	-0.59523	-0.323026	-0.252692	-0.525707	-0.639816	-0.470317	-0.502815	0.526575	0.533327	0.105472
clust2	ENSG00000120685	1.29062	2.30568	2.42696	-0.76625	-0.724311	-0.73978	-0.653587	-0.709604	-0.591381	-0.441132	-0.455576	-0.487235	-0.355248	-0.361129	-0.388603	0.205679	0.217421	0.227472
clust2	ENSG00000162836	1.16185	2.25031	2.32021	-0.879052	-0.882696	-0.851533	-0.533028	-0.377875	-0.664785	-0.376398	-0.517237	-0.746836	-0.420937	-0.512226	-0.262196	0.431397	0.318875	0.542166
clust2	ENSG00000120709	0.676017	2.24115	2.32241	-1.07165	-1.25058	-0.94779	-0.435571	-0.693054	-0.533566	-0.514242	-0.375085	-0.284643	-0.281945	-0.318687	-0.127402	0.467691	0.453863	0.673082
clust2	ENSG00000198719	0.783821	2.17629	2.59287	-0.645351	-0.750582	-0.796084	-0.461418	-0.66442	-0.6861	-0.424803	-0.600664	-0.811314	-0.54201	-0.189263	-0.283719	0.353256	0.43874	0.510752
clust2	ENSG00000164620	2.05072	2.00812	1.83073	-1.17042	-1.18971	-0.63102	-0.6153	-0.669138	-0.725018	-0.535131	-0.486417	0.233143	0.0260561	-0.0786399	-0.47848	0.150277	0.14073	0.139494
clust2	ENSG00000133193	1.89374	1.96666	2.01261	-0.920447	-0.927311	-0.842589	-0.791029	-0.166863	-0.895382	-0.186895	-0.717198	-0.315093	-0.0858011	-0.330228	-0.685655	0.530623	0.239912	0.220951
clust2	ENSG00000135469	1.89764	2.00432	2.07014	-0.701722	-1.20749	-0.48309	-0.641095	-0.495702	-0.605657	-0.593863	-0.71941	-0.104253	-0.669285	-0.283177	-0.415935	0.380646	0.298822	0.269119
clust2	ENSG00000139187	1.59166	2.33786	2.10501	-0.866711	-0.937538	-0.525614	-0.510128	-0.304994	-0.707259	-0.291289	-0.596103	-0.825677	-0.268764	0.0605074	0.00391713	0.123389	0.316556	-0.704824
clust2	ENSG00000244274	1.77107	2.18397	2.04758	-0.887559	-1.13747	-0.0488642	0.148412	-0.686026	-1.14706	-0.0357749	-0.478679	-0.387841	-0.19037	-0.365966	-0.659925	0.0250786	-0.00400311	-0.14657
clust2	ENSG00000155980	1.37217	2.16586	2.14543	-1.06021	-1.07637	-1.09796	-0.373192	-0.436097	-0.40844	-0.228523	-0.169779	-0.192698	-0.555077	-0.740443	-0.569219	0.274	0.393164	0.557381
clust2	ENSG00000160688	1.38105	2.14585	2.13128	-1.10297	-1.08573	-1.03377	-0.406468	-0.180648	-0.500577	-0.199106	-0.495932	-0.232573	-0.693289	-0.523972	-0.552868	0.559982	0.334755	0.454996
clust2	ENSG00000179051	1.15441	2.17133	2.31091	-0.68683	-1.00638	-0.844904	-0.288132	-0.377922	-0.322149	-0.50486	-0.555774	-0.414239	-0.664395	-0.77146	-0.726036	0.447084	0.501407	0.577955
clust2	ENSG00000110395	1.33353	2.10217	2.24776	-1.10714	-1.06573	-0.997476	-0.101885	-0.445635	0.0548672	-0.24305	-0.462264	-0.454918	-0.4974	-0.829992	-0.595191	0.414441	0.202016	0.445895
clust2	ENSG00000119487	1.33436	2.07877	2.17212	-1.23021	-0.95816	-1.09248	-0.112094	-0.10218	-0.274272	-0.548396	-0.31758	-0.457062	-0.658605	-0.711322	-0.507989	0.432378	0.413978	0.538741
clust2	ENSG00000131480	1.2558	1.97771	2.58155	-1.04398	-0.708599	-0.952929	-0.325659	-0.46703	-0.412918	-0.289607	-0.777689	-0.637068	-0.169603	-0.236038	-0.544994	0.315716	-0.0839969	0.519333
clust2	ENSG00000130560	1.13115	2.21213	2.33338	-0.852204	-1.21738	-0.915266	-0.0146189	-0.000308119	-0.283154	-0.590609	-0.395359	-0.796021	-0.536733	-0.419188	-0.590465	0.248135	0.404516	0.281989
clust2	ENSG00000278129	1.5102	2.10793	2.35916	-0.999455	-0.949931	-0.821326	0.0944417	-0.453717	-0.248304	-0.509634	-0.742052	-0.735576	-0.377185	-0.24687	-0.455127	0.034625	0.190424	0.242399
clust2	ENSG00000082458	1.46271	2.34145	2.22266	-0.682622	-0.786967	-0.788984	-0.180306	-0.27896	-0.184691	-0.987316	-0.75136	-0.780473	-0.298657	-0.292509	-0.444121	0.171153	0.163738	0.0952556
clust2	ENSG00000180304	1.33194	2.21868	2.24348	-0.836035	-1.0255	-0.94005	-0.112906	-0.0388361	-0.00397372	-0.836446	-0.852573	-0.677985	-0.38238	-0.346862	-0.511723	0.254228	0.192143	0.324799
clust2	ENSG00000139668	1.84273	2.03603	2.05053	-0.792517	-0.97952	-0.753673	-0.378321	-0.637605	-0.406296	-0.610352	-0.786124	-0.774262	-0.247709	-0.342095	-0.357382	0.476025	0.183541	0.476995
clust2	ENSG00000121644	1.88389	2.06378	2.10462	-0.79515	-0.878678	-0.90025	-0.308415	-0.574607	-0.267734	-0.447884	-0.568929	-0.452204	-0.468454	-0.728653	-0.551692	0.290478	0.26297	0.336908
clust2	ENSG00000177479	1.91699	2.01538	2.05517	-1.08851	-0.994469	-0.825838	-0.277965	-0.36526	-0.0777758	-0.560033	-0.68167	-0.555723	-0.254523	-0.656497	-0.405473	0.386777	0.15337	0.216048
clust2	ENSG00000111707	2.00566	1.99025	2.25783	-0.762569	-0.898194	-0.820066	-0.212007	-0.274556	-0.105229	-0.670249	-0.644073	-0.753515	-0.268683	-0.331035	-0.311351	-0.046931	-0.0509011	-0.104382
clust2	ENSG00000071994	1.84013	2.01337	2.10101	-0.753711	-1.05957	-1.05613	-0.0613254	-0.173012	-0.317739	-0.845156	-0.613033	-0.796233	-0.0659845	-0.335226	-0.480844	0.169908	0.145031	0.288504
clust2	ENSG00000059804	1.79353	2.00204	2.05121	-1.01944	-1.07763	-1.01901	-0.0497261	-0.145235	0.00234985	-0.733275	-0.799894	-0.801897	-0.313825	-0.319252	-0.311306	0.283379	0.261224	0.196764
clust2	ENSG00000143494	2.10518	1.9377	1.98214	-0.98296	-0.984972	-0.987669	-0.0387698	-0.212169	-0.0112923	-0.538707	-0.738695	-0.621647	-0.385302	-0.455604	-0.523264	0.116594	0.132366	0.207075
clust2	ENSG00000047662	1.95031	2.07915	1.95554	-0.805485	-0.768856	-0.870579	-0.278072	-0.353948	-0.585193	-0.767528	-0.370476	-0.660236	-0.525773	-0.292381	-0.450678	0.284782	0.773979	-0.314554
clust2	ENSG00000106554	2.13738	1.94557	1.98738	-0.629017	-0.687052	-0.790146	-0.415459	-0.319583	-0.446604	-0.725483	-0.69672	-0.573067	-0.659292	-0.443773	-0.631202	0.319335	0.488919	0.138815
clust2	ENSG00000092199	1.88203	2.01103	1.97854	-0.670305	-0.836447	-0.869788	-0.447889	-0.419684	-0.442183	-0.618981	-0.782224	-0.472275	-0.635744	-0.492673	-0.656289	0.483395	0.529771	0.459711
clust2	ENSG00000143420	1.94548	1.90009	2.01479	-0.699133	-0.96827	-0.882561	-0.264697	-0.27096	-0.396169	-0.572274	-0.739427	-0.464198	-0.566391	-0.526046	-0.852101	0.357728	0.576107	0.408027
clust2	ENSG00000110955	1.75911	2.13097	2.01855	-0.906947	-0.935374	-0.974952	-0.560482	-0.360996	-0.524701	-0.689949	-0.450888	-0.506225	-0.46599	-0.298752	-0.43178	0.329161	0.496387	0.372863
clust2	ENSG00000175792	1.69781	2.02888	2.06976	-0.976119	-0.829489	-0.875559	-0.292253	-0.0285702	-0.299297	-0.664693	-0.589422	-0.613475	-0.685713	-0.667993	-0.642741	0.465982	0.535223	0.367667
clust2	ENSG00000029639	1.9907	2.16334	1.98324	-0.960149	-0.91379	-0.907548	-0.351804	-0.146509	-0.547967	-0.858548	-0.435197	-0.629767	-0.00502682	-0.104126	-0.220566	-0.112951	0.0486213	0.00805207
clust2	ENSG00000197415	1.86154	1.99068	2.10694	-0.782088	-0.802372	-0.803928	-0.621517	-0.622925	-0.588302	-0.786019	-0.809124	-0.748366	0.105107	0.20392	-0.231905	-0.0259652	0.369915	0.184409
clust2	ENSG00000089022	1.514	2.1125	2.08851	-0.72938	-0.793764	-0.913409	-0.317205	-0.404473	-0.156843	-1.15373	-0.66368	-0.863866	-0.357379	-0.381609	-0.365197	0.398098	0.611137	0.376305
clust2	ENSG00000100814	1.52477	2.17089	2.15373	-0.659961	-0.621109	-0.790982	-0.495773	-0.204351	-0.275325	-1.12975	-0.89145	-0.923386	-0.289645	-0.244868	-0.312219	0.37833	0.401853	0.209237
clust2	ENSG00000174721	1.73254	2.01191	2.18106	-0.699372	-1.01917	-0.860508	-0.409482	-0.0516207	-0.366669	-0.908735	-1.01383	-0.613736	-0.315118	-0.294794	-0.0454597	0.404427	0.167558	0.100998
clust2	ENSG00000196208	1.58312	2.17356	2.2176	-0.725962	-0.710086	-0.684048	-0.263956	-0.414533	-0.319608	-0.804102	-1.05846	-1.03207	0.00916008	-0.213732	-0.215384	0.182235	0.0569654	0.219297
clust2	ENSG00000166822	1.29	2.36604	2.35018	-0.154032	-0.260899	-0.595838	-0.23313	-0.643093	-0.326781	-0.855141	-0.762856	-1.00322	-0.60598	-0.387898	-0.55197	0.174633	0.113326	0.0866579
clust2	ENSG00000049246	0.801412	2.57497	2.47227	-0.478118	-0.420875	-0.3754	-0.489407	-0.457046	-0.410676	-0.742056	-0.819999	-0.667358	-0.5584	-0.376235	-0.481226	0.266473	-0.00273284	0.164397
clust2	ENSG00000167771	1.07815	2.49024	2.5096	-0.457915	-0.399971	-0.682952	-0.373256	-0.397061	-0.46268	-0.688525	-0.676744	-0.758601	-0.387751	-0.335197	-0.46893	0.021965	-0.0195529	0.00918023
clust2	ENSG00000133627	1.33601	2.40721	2.27606	-0.565637	-0.866163	-0.495367	-0.530917	-0.588608	-0.337694	-0.977753	-0.58599	-0.539658	-0.39565	-0.435409	-0.327855	0.273097	0.161815	0.192517
clust2	ENSG00000071626	1.10954	2.3744	2.3458	-0.286375	-0.500193	-0.283321	-0.755526	-0.442604	-0.723284	-0.842795	-0.769225	-0.781632	-0.477969	-0.473959	-0.482156	0.358441	0.31275	0.3181
clust2	ENSG00000114738	1.04906	2.50725	2.45004	-0.318423	-0.320316	-0.414337	-0.624215	-0.384918	-0.688841	-0.931388	-0.532667	-0.520103	-0.41454	-0.540103	-0.54922	-0.0259275	0.10215	0.156506
clust2	ENSG00000145919	1.44578	2.32924	2.30214	-0.715919	-0.556076	-0.7692	-0.39677	0.0997182	-0.362696	-0.939015	-0.829648	-0.852874	-0.133957	-0.0354764	-0.327267	0.0171394	-0.0660918	-0.209039
clust2	ENSG00000180190	1.5758	2.24043	2.32488	-0.203575	-0.443818	-0.267436	-0.238541	-0.23653	-0.200639	-1.07101	-0.887788	-1.07072	-0.395274	-0.396091	-0.356475	-0.309034	0.0379527	-0.102127
clust2	ENSG00000184428	1.37977	2.32738	2.43037	-0.258241	-0.172618	-0.374994	-0.353568	-0.0477955	-0.472839	-1.16487	-0.86179	-0.70148	-0.458168	-0.125662	-0.421668	-0.190378	-0.192087	-0.341359
clust2	ENSG00000125337	1.43581	2.00085	2.73224	-0.572403	-0.572403	-0.572403	-0.221879	-0.572403	-0.572403	-0.218273	-0.572403	-0.572403	0.0961894	-0.572403	-0.572403	-0.572403	0.152332	-0.253244
clust2	ENSG00000183206	1.1737	1.94237	2.91717	-0.497091	-0.497091	-0.497091	0.081306	-0.497091	-0.497091	-0.497091	-0.497091	-0.497091	-0.497091	-0.497091	-0.497091	0.347643	-0.497091	-0.497091
clust2	ENSG00000182223	1.16825	1.76479	3.14041	-0.447141	-0.447141	-0.447141	-0.447141	-0.447141	-0.447141	-0.447141	-0.447141	-0.447141	-0.447141	-0.447141	-0.447141	-0.0176281	-0.447141	-0.242994
clust2	ENSG00000182747	1.01538	1.91401	3.10263	-0.452171	-0.452171	-0.452171	-0.145753	-0.452171	-0.452171	-0.452171	-0.452171	-0.452171	-0.452171	-0.452171	-0.452171	-0.00803682	-0.452171	-0.452171
clust2	ENSG00000278570	1.10035	2.36828	2.68956	-0.618406	-0.333932	-0.342813	-0.367014	-0.492359	-0.484462	-0.618406	-0.49435	-0.376576	-0.618406	-0.506984	-0.486528	-0.252907	-0.105762	-0.0592925
clust2	ENSG00000144550	1.20647	2.40706	2.63274	-0.503659	-0.451171	-0.355285	-0.412129	-0.412701	-0.503659	-0.456834	-0.458326	-0.45908	-0.503659	-0.462927	-0.503659	-0.287754	-0.455502	-0.0199344
clust2	ENSG00000162105	1.25094	2.42181	2.58416	-0.359731	-0.391671	-0.279527	-0.487563	-0.488517	-0.500159	-0.393568	-0.447739	-0.382344	-0.586858	-0.633671	-0.631915	-0.16931	-0.283368	-0.220974
clust2	ENSG00000129194	1.32211	2.4538	2.50485	-0.22395	-0.444666	-0.42737	-0.585106	-0.440316	-0.567413	-0.519987	-0.420057	-0.508959	-0.661535	-0.46451	-0.421251	-0.183213	-0.12699	-0.285444
clust2	ENSG00000130054	1.35596	2.42214	2.49711	-0.504329	-0.462248	-0.484165	-0.479199	-0.544558	-0.52299	-0.384926	-0.175798	-0.424193	-0.612194	-0.612194	-0.612194	-0.188475	-0.100898	-0.166855
clust2	ENSG00000183421	1.20475	2.36948	2.63009	-0.564221	-0.495822	-0.467473	-0.478678	-0.342108	-0.472231	-0.392689	-0.481225	-0.375833	-0.596463	-0.596463	-0.596463	-0.146932	0.0223857	-0.220106
clust2	ENSG00000181790	1.34853	2.25942	2.61313	-0.527932	-0.539694	-0.463786	-0.465239	-0.395866	-0.549875	-0.253645	-0.487825	-0.40495	-0.617462	-0.657782	-0.651426	0.136271	-0.22506	-0.116807
clust2	ENSG00000182732	1.26071	2.24297	2.75214	-0.467289	-0.417961	-0.466191	-0.347312	-0.429528	-0.511792	-0.345634	-0.511792	-0.511792	-0.393148	-0.475335	-0.511792	-0.0414559	-0.425754	-0.399045
clust2	ENSG00000113430	1.01771	2.2255	2.8728	-0.478114	-0.478114	-0.478114	-0.478114	-0.478114	-0.478114	-0.478114	-0.478114	-0.342107	-0.478114	-0.478114	-0.478114	-0.0786277	-0.33127	-0.104752
clust2	ENSG00000144847	1.16616	2.1964	2.81732	-0.283385	-0.328326	-0.461143	-0.592594	-0.592594	-0.497061	-0.272642	-0.592594	-0.449121	-0.592594	-0.385774	-0.49852	-0.178629	-0.32059	-0.134311
clust2	ENSG00000110076	0.965506	2.58474	2.57364	-0.296679	-0.223678	-0.334494	-0.441165	-0.217729	-0.466782	-0.55011	-0.486805	-0.499111	-0.573957	-0.59565	-0.548786	-0.213827	-0.391169	-0.28394
clust2	ENSG00000186907	0.920632	2.50761	2.66755	-0.431944	-0.451097	-0.232971	-0.289823	-0.19796	-0.524742	-0.471905	-0.450041	-0.594237	-0.427481	-0.520021	-0.655266	-0.2268	-0.302764	-0.318746
clust2	ENSG00000105523	1.00865	2.4191	2.71309	-0.553054	-0.550605	-0.552017	-0.294923	-0.159028	-0.472259	-0.477513	-0.336302	-0.410844	-0.520229	-0.492723	-0.513915	-0.371874	-0.211152	-0.224401
clust2	ENSG00000134317	0.884252	2.40788	2.76808	-0.541809	-0.458121	-0.423029	-0.331817	-0.333373	-0.504252	-0.471378	-0.0732804	-0.580776	-0.476967	-0.580776	-0.505434	-0.17067	-0.286432	-0.322095
clust2	ENSG00000186994	0.785861	2.47968	2.71955	-0.477528	-0.557152	-0.354478	-0.107103	-0.306872	-0.560192	-0.601864	-0.277604	-0.490002	-0.564035	-0.567199	-0.52059	-0.0863596	-0.366999	-0.14712
clust2	ENSG00000121104	1.08648	2.51547	2.55313	-0.55151	-0.479366	-0.594602	-0.32575	-0.22744	-0.488817	-0.772708	-0.532261	-0.358578	-0.27893	-0.36689	-0.581899	-0.166506	-0.282425	-0.147401
clust2	ENSG00000162728	0.981339	2.38411	2.74217	-0.492649	-0.492649	-0.492649	-0.492649	-0.234586	-0.492649	-0.492649	-0.492649	-0.242917	-0.492649	-0.492649	-0.222621	0.0116416	-0.492649	-0.492649
clust2	ENSG00000125246	1.86779	2.27176	2.19815	-0.558615	-0.750054	-0.761479	-0.145937	-0.0772837	0.0580547	-0.478523	-0.240087	-0.722005	-0.483651	-0.392435	-0.603138	-0.419215	-0.323432	-0.439903
clust2	ENSG00000102096	1.58161	2.37222	2.34758	-0.745627	-0.631682	-0.707661	-0.0853279	-0.173818	-0.0771726	-0.566615	-0.59003	-0.578099	-0.342991	-0.514406	-0.504116	-0.351789	-0.2599	-0.172177
clust2	ENSG00000235568	1.68022	2.28854	2.36883	-0.547226	-0.537727	-0.543202	-0.187808	-0.0488016	-0.0836736	-0.633638	-0.487573	-0.563986	-0.349145	-0.643846	-0.631363	-0.414476	-0.0933472	-0.57177
clust2	ENSG00000181274	1.77947	2.2592	2.30113	-0.683503	-0.599282	-0.689247	-0.0468741	-0.0993464	-0.52916	-0.51613	-0.479914	-0.725511	-0.503578	-0.497399	-0.407375	-0.309411	-0.0191709	-0.233904
clust2	ENSG00000204644	1.81608	2.29246	2.2128	-0.61912	-0.61912	-0.61912	-0.0883867	-0.433698	-0.328151	-0.52354	-0.436573	-0.61912	-0.61912	-0.61912	-0.61912	-0.263723	-0.0690896	0.155659
clust2	ENSG00000137460	2.06215	2.15454	2.16341	-0.612817	-0.551627	-0.567813	-0.152735	-0.324169	-0.181898	-0.507942	-0.480819	-0.544935	-0.655699	-0.709028	-0.70052	-0.15698	-0.120849	-0.112272
clust2	ENSG00000185737	2.01125	2.26747	2.15324	-0.580133	-0.580133	-0.580133	-0.231682	-0.367792	-0.213117	-0.580133	-0.40496	-0.544909	-0.580133	-0.580133	-0.542043	-0.239125	-0.322826	-0.084707
clust2	ENSG00000165084	1.70294	2.48611	2.02768	-0.661436	-0.661436	-0.548978	-0.457178	0.136511	-0.338859	-0.661436	-0.166337	-0.661436	-0.661436	-0.661436	-0.661436	0.123851	-0.135545	-0.20014
clust2	ENSG00000168065	1.32136	2.43662	2.36073	-0.570788	-0.570788	-0.570788	-0.570788	0.242263	-0.570788	-0.570788	-0.168388	-0.570788	-0.570788	-0.570788	-0.570788	0.229218	-0.143134	-0.570788
clust2	ENSG00000104140	1.70183	2.26779	2.33435	-0.632868	-0.618206	-0.461183	-0.42444	0.196046	-0.720689	-0.493376	-0.106069	-0.511537	-0.512695	-0.352536	-0.640316	-0.297516	-0.128757	-0.599826
clust2	ENSG00000214866	2.0784	1.75941	2.49292	-0.558376	-0.558376	-0.558376	-0.383929	0.114216	-0.558376	-0.558376	-0.22061	-0.558376	-0.558376	-0.558376	-0.558376	-0.0569018	-0.199738	-0.558376
clust2	ENSG00000058600	1.43163	2.4974	2.31549	-0.601109	-0.54665	-0.484691	-0.189013	-0.357159	-0.273343	-0.435816	-0.563649	-0.459686	-0.565499	-0.761831	-0.712636	-0.0270501	-0.300017	0.0336284
clust2	ENSG00000145911	1.5313	2.39013	2.37084	-0.488223	-0.561395	-0.512341	-0.41919	-0.253924	-0.204653	-0.454425	-0.468752	-0.394506	-0.72645	-0.720214	-0.743367	-0.0710329	-0.133837	-0.139955
clust2	ENSG00000080854	1.65878	2.30056	2.33935	-0.666115	-0.616143	-0.587038	-0.26229	-0.271	-0.146182	-0.538964	-0.528525	-0.476187	-0.644868	-0.675826	-0.662582	-0.186137	-0.0826307	0.0457988
clust2	ENSG00000165821	1.57074	2.34331	2.38479	-0.641678	-0.579889	-0.604152	-0.248145	-0.233313	-0.12417	-0.408848	-0.550003	-0.490693	-0.528575	-0.790264	-0.653539	-0.170336	-0.166282	-0.108953
clust2	ENSG00000186854	1.41542	2.24603	2.64489	-0.60519	-0.51001	-0.604632	-0.194278	-0.233628	-0.329682	-0.543406	-0.36988	-0.411739	-0.567533	-0.554381	-0.498456	-0.203401	-0.415277	-0.264858
clust2	ENSG00000113749	1.26519	2.43384	2.56159	-0.536077	-0.566633	-0.467618	-0.220719	-0.313249	-0.254374	-0.420277	-0.398466	-0.42945	-0.621315	-0.621315	-0.604395	-0.278958	-0.286695	-0.241077
clust2	ENSG00000135144	1.27408	2.43048	2.54006	-0.560528	-0.52752	-0.560528	-0.210118	-0.339438	-0.298662	-0.502085	-0.503945	-0.532523	-0.560528	-0.560528	-0.560528	-0.0310591	-0.30262	-0.194002
clust2	ENSG00000006047	1.5454	2.42025	2.41725	-0.557233	-0.494251	-0.511142	-0.27003	-0.293715	-0.233221	-0.434483	-0.502733	-0.440134	-0.490839	-0.557233	-0.542472	-0.212881	-0.43114	-0.411393
clust2	ENSG00000136828	1.49274	2.41941	2.41062	-0.392596	-0.422374	-0.363552	-0.150796	-0.242387	-0.210826	-0.453491	-0.637298	-0.553814	-0.562989	-0.655976	-0.643262	-0.266109	-0.573031	-0.194265
clust2	ENSG00000130775	1.43079	2.41744	2.42258	-0.562272	-0.610192	-0.718303	-0.446867	-0.299554	-0.206196	-0.585386	-0.770847	-0.504449	-0.374663	-0.404167	-0.348055	-0.256275	-0.0429507	-0.140642
clust2	ENSG00000172602	1.57929	2.45254	2.29797	-0.587533	-0.65404	-0.585926	-0.350917	-0.302831	-0.266361	-0.264951	-0.57355	-0.555766	-0.594427	-0.5816	-0.488123	-0.30787	0.0536095	-0.269508
clust2	ENSG00000159753	1.4464	2.45695	2.41074	-0.543696	-0.512806	-0.591535	-0.37915	-0.292807	-0.408455	-0.549234	-0.508513	-0.489643	-0.511102	-0.58144	-0.546554	-0.14646	-0.0847622	-0.167931
clust2	ENSG00000281406	1.48882	2.45611	2.39372	-0.567751	-0.541637	-0.591369	-0.359134	-0.281736	-0.263402	-0.481978	-0.485432	-0.507665	-0.591369	-0.51486	-0.568446	-0.174382	-0.208541	-0.200949
clust2	ENSG00000176769	1.56293	2.25752	2.50391	-0.344533	-0.532579	-0.467443	-0.25027	-0.288934	-0.389105	-0.58626	-0.484664	-0.526929	-0.630478	-0.630478	-0.630478	-0.464759	-0.0074808	-0.0899701
clust2	ENSG00000149926	1.53975	2.2479	2.47522	-0.624028	-0.275733	-0.503876	-0.545368	-0.183693	-0.490697	-0.630804	-0.57046	-0.414915	-0.746015	-0.587757	-0.582117	-0.140754	0.0431082	-0.00976102
clust2	ENSG00000141480	1.54848	2.35672	2.34818	-0.417065	-0.363391	-0.486592	-0.438527	-0.324251	-0.481127	-0.691048	-0.731647	-0.701751	-0.547422	-0.542936	-0.578094	-0.117145	0.10247	0.0651453
clust2	ENSG00000160867	1.61747	2.41549	2.33131	-0.435632	-0.341308	-0.417379	-0.368514	-0.387177	-0.515897	-0.628403	-0.656196	-0.553464	-0.509582	-0.570059	-0.550032	-0.164695	-0.11905	-0.146883
clust2	ENSG00000160117	1.63139	2.47733	2.08147	-0.881837	-0.734786	-0.646	-0.134353	-0.254955	-0.110693	-0.466147	-0.733032	-0.510578	-0.455209	-0.786402	-0.391572	-0.0284939	-0.17304	0.116908
clust2	ENSG00000066032	1.70293	2.55962	1.95049	-0.648059	-0.703605	-0.745264	-0.188547	-0.250329	-0.400544	-0.497072	-0.331877	-0.46082	-0.675321	-0.712977	-0.688166	0.0439488	-0.0239322	0.069532
clust2	ENSG00000088538	1.74535	2.34639	2.27657	-0.630577	-0.680266	-0.599916	-0.261556	-0.437953	-0.314107	-0.409954	-0.387726	-0.447919	-0.597006	-0.600142	-0.595703	-0.076381	-0.298431	-0.0306628
clust2	ENSG00000112293	1.58326	2.46301	2.21654	-0.754848	-0.656984	-0.719958	-0.310488	-0.497224	-0.244709	-0.248833	-0.399775	-0.309352	-0.577738	-0.598574	-0.706136	-0.193819	-0.17024	0.125868
clust2	ENSG00000102230	1.75866	2.20433	2.24545	-0.773378	-0.750241	-0.720622	-0.0459501	-0.318014	-0.164421	-0.410333	-0.309522	-0.302166	-0.842466	-0.752558	-0.717091	-0.178303	-0.0480694	0.124694
clust2	ENSG00000143919	1.69149	2.31164	2.24308	-0.834592	-0.587678	-0.59498	-0.322062	-0.374268	-0.206445	-0.296822	-0.343816	-0.244425	-0.96718	-0.68623	-0.584257	-0.144353	0.120593	-0.1797
clust2	ENSG00000116990	1.2408	2.3518	2.42011	-0.763543	-0.647617	-0.514578	-0.389187	-0.228765	-0.172775	-0.52552	-0.483968	-0.44949	-0.650348	-0.806279	-0.843048	0.101558	0.177547	0.183296
clust2	ENSG00000158457	1.24485	2.38361	2.4053	-0.647685	-0.703117	-0.75885	-0.221226	-0.216245	-0.302581	-0.386444	-0.486618	-0.430949	-0.573764	-0.837604	-0.802996	0.117726	0.212115	0.00448062
clust2	ENSG00000103449	1.47272	2.33162	2.32136	-0.60621	-0.69342	-0.553364	-0.435807	-0.547262	-0.458422	-0.288212	-0.45446	-0.391959	-0.711839	-0.805846	-0.681816	0.121133	0.184467	0.197323
clust2	ENSG00000130475	1.44226	2.36367	2.33165	-0.524623	-0.560706	-0.73651	-0.152625	-0.500078	-0.274444	-0.554098	-0.438268	-0.412443	-0.663683	-0.83278	-0.756679	0.133527	0.147889	-0.0120537
clust2	ENSG00000105675	1.41663	2.53235	2.15162	-0.691942	-0.505797	-0.691942	-0.527675	-0.209618	-0.347802	-0.52599	-0.691942	0.222352	-0.37935	-0.547684	-0.691942	0.384312	-0.35324	-0.542339
clust2	ENSG00000204655	1.35075	2.40336	2.42771	-0.512602	-0.512602	-0.512602	-0.167295	-0.512602	-0.328586	-0.512602	-0.512602	-0.512602	-0.512602	-0.512602	-0.512602	0.465287	-0.512602	-0.512602
clust2	ENSG00000185811	1.84854	1.92107	2.48907	-0.465811	-0.64842	-0.46133	-0.310209	-0.535171	-0.175154	-0.533271	-0.64842	-0.484473	-0.64842	-0.64842	-0.64842	0.36432	-0.125809	-0.289673
clust2	ENSG00000188582	1.81355	2.12122	2.32866	-0.121491	-0.463969	-0.333078	-0.450069	-0.621747	-0.570775	-0.664118	-0.414428	-0.500737	-0.420203	-0.708187	-0.708187	0.442238	-0.484103	-0.244577
clust2	ENSG00000170231	1.90536	2.14121	2.28951	-0.574061	-0.370657	-0.574061	-0.574061	-0.0641922	-0.574061	-0.574061	-0.574061	-0.574061	-0.574061	-0.26449	-0.574061	-0.0718691	-0.574061	0.175738
clust2	ENSG00000274641	1.86145	2.1394	2.27717	-0.381473	-0.238496	-0.673164	-0.673164	-0.528987	-0.673164	-0.5267	-0.531153	-0.0972175	-0.673164	0.0231584	-0.673164	-0.000811712	-0.673164	0.0426443
clust2	ENSG00000166840	1.79404	2.35771	2.149	-0.524065	-0.322793	-0.553568	-0.623039	-0.653867	-0.653867	-0.357122	-0.449422	-0.291248	-0.624322	-0.653867	-0.653867	-0.0810116	0.0782158	0.0630885
clust2	ENSG00000155846	1.68035	2.35554	2.25379	-0.584971	-0.705399	-0.715286	-0.273953	-0.629924	-0.605587	-0.448983	-0.539173	-0.498779	-0.423273	-0.456459	-0.443144	-0.0793308	-0.043899	0.158483
clust2	ENSG00000178233	1.78902	2.26523	2.30802	-0.531214	-0.568787	-0.549425	-0.368976	-0.38582	-0.442725	-0.533341	-0.568787	-0.568787	-0.568787	-0.568787	-0.550445	-0.25499	0.0248793	0.073717
clust2	ENSG00000250366	1.77097	2.31231	2.30833	-0.565445	-0.565445	-0.565445	-0.337917	-0.266911	-0.451986	-0.508963	-0.532113	-0.543425	-0.565445	-0.565445	-0.565445	-0.109089	-0.132976	-0.115554
clust2	ENSG00000164076	1.92619	2.20395	2.25826	-0.566956	-0.566956	-0.566956	-0.460403	-0.448695	-0.48145	-0.552733	-0.553188	-0.553418	-0.489048	-0.506868	-0.537931	-0.001847	-0.137013	0.0350659
clust2	ENSG00000177108	1.86235	2.30107	2.24172	-0.580412	-0.552394	-0.580412	-0.50835	-0.422316	-0.52899	-0.440948	-0.347565	-0.447185	-0.568459	-0.56946	-0.554687	-0.197475	-0.0748805	-0.0316102
clust2	ENSG00000268089	1.81657	2.299	2.26701	-0.58652	-0.552428	-0.491622	-0.543815	-0.573046	-0.481019	-0.417536	-0.503408	-0.400553	-0.532476	-0.513296	-0.602441	-0.0841141	-0.146854	0.0465454
clust2	ENSG00000167619	1.84609	2.51425	2.02319	-0.283049	-0.338041	-0.235643	-0.453748	-0.606831	-0.59943	-0.488625	-0.570539	-0.610643	-0.611011	-0.586139	-0.443433	-0.251626	-0.023204	-0.281575
clust2	ENSG00000117971	1.67926	2.44917	2.22627	-0.333766	-0.621628	-0.442485	-0.458223	-0.566856	-0.449172	-0.456563	-0.307394	-0.516235	-0.621628	-0.621628	-0.621628	0.0335183	-0.182363	-0.18866
clust2	ENSG00000173093	1.51557	2.59865	2.22297	-0.488368	-0.488368	-0.488368	-0.488368	-0.488368	-0.488368	-0.488368	-0.488368	-0.488368	-0.488368	-0.488368	-0.378921	0.0915562	-0.378974	-0.298818
clust2	ENSG00000176834	1.995	2.15871	2.16875	-0.384293	-0.219975	-0.25729	-0.894366	-0.945763	-0.663701	-0.283758	-0.451883	-0.420705	-0.49345	-0.570615	-0.435629	-0.0382341	-0.0940353	-0.168758
clust2	ENSG00000197024	2.05617	2.16448	2.19253	-0.389976	-0.353731	-0.406632	-0.729963	-0.85282	-0.679433	-0.362859	-0.442177	-0.437569	-0.323319	-0.447675	-0.417389	-0.219634	-0.239546	-0.110463
clust2	ENSG00000088305	2.0079	2.19186	2.21436	-0.281213	-0.355876	-0.369517	-0.706665	-0.694778	-0.660151	-0.320307	-0.370596	-0.353483	-0.630289	-0.560608	-0.570269	-0.157542	-0.21075	-0.172084
clust2	ENSG00000164626	2.00048	2.23713	2.2062	-0.325115	-0.180021	-0.397271	-0.542854	-0.555911	-0.552691	-0.480716	-0.439634	-0.486495	-0.60849	-0.60849	-0.60849	-0.162317	-0.254122	-0.241188
clust2	ENSG00000176244	1.71575	2.33008	2.27229	-0.27125	-0.179928	-0.392485	-0.840743	-0.73384	-0.603249	-0.481762	-0.593774	-0.541003	-0.542051	-0.45693	-0.428921	-0.0157826	-0.0845959	-0.1518
clust2	ENSG00000181896	1.79689	2.28131	2.293	-0.480851	-0.440657	-0.409202	-0.782565	-0.657887	-0.52219	-0.599112	-0.322173	-0.373999	-0.498761	-0.447343	-0.564534	-0.0585484	-0.0763347	-0.137044
clust2	ENSG00000149474	1.47658	2.28356	2.40537	-0.543561	-0.245604	-0.393887	-0.701495	-0.74545	-0.768539	-0.506429	-0.675116	-0.784703	-0.347527	-0.207624	-0.397933	-0.00307245	0.0163128	0.139116
clust2	ENSG00000167525	1.35796	2.45956	2.35533	-0.209121	-0.174214	-0.477189	-0.606915	-0.83771	-0.696837	-0.174468	-0.822465	-0.469815	-0.532842	-0.322331	-0.588696	-0.122083	-0.155852	0.0176977
clust2	ENSG00000188559	2.02811	2.00148	2.16979	-0.731518	-0.696174	-0.34044	-0.171685	-0.504298	-0.290427	-0.450904	-0.370897	-0.369935	-0.914418	-1.00484	-0.532016	-0.121703	0.113719	0.186158
clust2	ENSG00000139737	2.15899	2.03241	2.00644	-0.618221	-0.607378	-0.648651	-0.358335	-0.360827	-0.336608	-0.5358	-0.432277	-0.360926	-0.75035	-0.803058	-0.819126	-0.0926253	0.327621	0.19872
clust2	ENSG00000146938	2.20054	2.01151	2.10201	-0.46648	-0.427993	-0.458697	-0.364844	-0.347079	-0.24399	-0.394576	-0.542328	-0.317682	-0.857592	-0.857592	-0.857592	-0.0658708	-0.0783315	-0.0334111
clust2	ENSG00000183067	1.80285	2.12854	2.29042	-0.569472	-0.173447	-0.560903	-0.512521	-0.363433	-0.531999	-0.760623	-0.0673683	-0.241624	-0.812587	-0.633224	-0.945972	-0.0361912	-0.122976	0.11053
clust2	ENSG00000198889	1.82709	2.2483	2.04448	-0.199844	-0.492298	-0.261129	-0.654254	-0.385102	-0.642686	-0.570557	-0.502904	-0.294836	-0.86872	-0.86872	-0.86872	0.37686	-0.0117332	0.124777
clust2	ENSG00000158467	2.05614	2.16561	2.09733	-0.406017	-0.271357	-0.344432	-0.368693	-0.811342	-0.219066	-0.60827	-0.631204	-0.612608	-0.814321	-0.579496	-0.394009	-0.00128477	-0.405462	0.148483
clust2	ENSG00000198182	2.10872	2.16414	2.01583	-0.364787	-0.489264	-0.212409	-0.166698	-0.433729	-0.369765	-0.5725	-0.372576	-0.762078	-0.985588	-0.64631	-0.664886	0.217268	-0.200523	-0.264837
clust2	ENSG00000177842	2.21246	2.1542	2.0189	-0.266839	-0.358409	-0.49557	-0.456493	-0.427658	-0.295446	-0.414769	-0.407184	-0.452761	-0.835249	-0.955357	-0.37515	-0.312623	-0.260634	-0.071417
clust2	ENSG00000186648	2.29276	2.18092	1.98436	-0.385644	-0.463493	-0.491434	-0.503724	-0.305201	-0.206508	-0.439911	-0.38675	-0.409942	-0.590644	-0.594149	-0.632538	-0.48618	-0.434576	-0.127344
clust2	ENSG00000134215	2.3046	1.98129	2.15769	-0.551289	-0.530422	-0.531083	-0.496524	-0.391881	-0.493472	-0.477825	-0.394334	-0.498619	-0.53365	-0.551289	-0.551289	-0.0809319	-0.180588	-0.180381
clust2	ENSG00000180616	2.33849	1.95369	2.04555	-0.530359	-0.600266	-0.64996	-0.459806	-0.527469	-0.36716	-0.55258	-0.438952	-0.545438	-0.626402	-0.569125	-0.563251	-0.0300083	0.0153499	0.107699
clust2	ENSG00000102003	2.39094	2.20306	1.79935	-0.497752	-0.58382	-0.489149	-0.339777	-0.0512062	-0.42999	-0.447809	-0.597888	-0.602232	-0.557394	-0.499801	-0.65683	-0.122238	-0.253328	-0.264126
clust2	ENSG00000204287	2.23419	2.08699	2.15423	-0.426859	-0.528922	-0.528922	-0.255393	-0.174046	-0.528922	-0.432562	-0.528922	-0.528922	-0.528922	-0.528922	-0.528922	-0.261163	-0.335459	-0.358543
clust2	ENSG00000056736	1.6371	2.47345	2.06805	-0.216419	-0.921237	-0.891107	-0.454932	-0.576146	-0.579709	-0.465237	-0.291408	-0.253139	-0.336841	-0.822633	-0.276143	-0.231825	-0.111716	0.249893
clust2	ENSG00000124635	1.75768	2.22227	2.20168	-0.673615	-0.849042	-0.537798	-0.799361	-0.666938	-0.712572	-0.133811	-0.342558	-0.416545	-0.539	-0.550314	-0.310806	0.250257	0.0122513	0.0882237
clust2	ENSG00000154814	1.94587	2.10702	2.28511	-0.899261	-0.590217	-0.59929	-0.542802	-0.551759	-0.529606	-0.235787	-0.377706	-0.265877	-0.492818	-0.615142	-0.487697	0.0684022	-0.110254	-0.108185
clust2	ENSG00000107833	1.77903	2.15158	2.18818	-0.571499	-0.845947	-0.481432	-0.315118	-0.166527	-0.452268	-0.796207	-0.557127	-0.597614	-0.75161	-0.528053	-0.681952	0.265992	0.361927	-0.00135303
clust2	ENSG00000181924	1.82638	2.30043	1.95126	-0.78394	-0.683202	-0.598988	-0.514083	-0.217598	-0.489405	-0.807005	-0.625538	-0.680509	-0.425825	-0.489684	-0.600872	0.231147	0.45854	0.148888
clust2	ENSG00000132330	1.96587	2.31505	1.96031	-0.719592	-0.488435	-0.641753	-0.274495	-0.336571	-0.423991	-0.718109	-0.63142	-0.683804	-0.329755	-0.610648	-0.676405	0.0606477	-0.032604	0.265703
clust2	ENSG00000118298	1.74369	2.25712	2.21822	-0.44332	-0.567155	-0.358528	-0.596187	-0.598839	-0.50441	-0.569109	-0.700104	-0.756187	-0.375189	-0.557024	-0.627854	0.294959	0.0439241	0.0959914
clust2	ENSG00000125878	1.80681	2.36754	2.06217	-0.47253	-0.656365	-0.223864	-0.404896	-0.260126	-0.656365	-0.656365	-0.569718	-0.656365	-0.656365	-0.656365	-0.656365	0.0441814	0.136459	0.108528
clust2	ENSG00000150401	1.58625	2.30729	2.22722	-0.440023	-0.429078	-0.469652	-0.336285	-0.428306	-0.369388	-0.241883	-1.1379	-0.775516	-0.428099	-0.841924	-0.532438	0.0736016	0.0690862	0.16704
clust2	ENSG00000154359	2.06434	2.09969	2.08096	-0.425075	-0.633039	-0.433128	-0.406619	-0.416267	-0.170036	-0.581408	-1.03014	-0.975376	-0.370143	-0.412202	-0.393653	-0.0624125	-0.116743	0.181248
clust2	ENSG00000167971	1.50614	2.55433	1.98297	-0.240539	-0.176722	-0.564069	0.193031	-0.835833	-0.315388	-0.961493	-0.307306	-0.480541	-0.535403	-0.378052	-0.751682	0.362982	-0.752294	-0.300119
clust2	ENSG00000168569	1.70998	2.48837	1.86468	-0.471648	-0.951885	-0.912861	0.0370693	-0.403532	-0.267153	-1.02183	-0.160887	-0.814318	-0.134029	-0.222956	-0.433237	0.0236468	-0.452959	0.123545
clust2	ENSG00000158220	1.96758	2.43123	1.95755	-0.528559	-0.344627	-0.690145	-0.323103	-0.373309	-0.120224	-0.0467448	-0.273518	-0.465972	-0.729551	-0.663411	-0.736449	-0.557063	-0.192502	-0.311192
clust2	ENSG00000185905	1.99905	2.44645	1.93189	-0.614898	-0.569414	-0.614898	-0.422884	-0.388301	0.109641	-0.384725	-0.16338	-0.361188	-0.614898	-0.614898	-0.573151	-0.391749	-0.492644	-0.28
clust2	ENSG00000111752	1.75262	2.29517	2.30551	-0.526212	-0.52268	-0.512073	-0.286186	-0.488634	-0.223536	-0.243759	-0.301085	-0.362496	-0.810733	-0.729825	-0.754966	-0.169515	-0.250728	-0.170876
clust2	ENSG00000185664	2.04156	2.17833	2.1988	-0.681739	-0.500918	-0.640006	-0.256219	-0.528169	-0.250958	-0.26748	-0.294463	-0.292874	-0.676874	-0.629799	-0.645555	-0.161255	-0.329785	-0.2626
clust2	ENSG00000076826	1.82693	2.27093	2.25385	-0.521442	-0.32601	-0.39952	-0.505075	-0.2188	-0.334089	-0.353163	-0.162291	-0.198437	-0.818906	-0.782671	-0.863899	-0.295084	-0.319251	-0.253069
clust2	ENSG00000168671	1.88219	2.26346	2.14778	-0.481587	-0.611536	-0.50773	-0.274985	-0.278061	-0.289062	-0.219252	-0.153761	0.0397538	-0.847953	-0.833866	-0.914202	-0.324883	-0.382444	-0.21386
clust2	ENSG00000102981	1.49808	2.4556	2.33642	-0.540679	-0.789786	-0.318246	-0.603458	-0.360623	-0.088191	-0.245492	-0.482313	-0.111274	-0.612895	-0.409339	-0.741721	-0.404549	-0.380775	-0.200755
clust2	ENSG00000176371	1.90235	2.26928	2.1661	-0.304454	-0.797593	-0.463888	-0.556584	-0.551906	-0.355297	-0.310331	-0.581149	-0.239357	-0.568605	-0.406907	-0.574125	-0.558252	-0.374431	0.305153
clust2	ENSG00000111087	1.60749	2.36219	2.37348	-0.579374	-0.669107	-0.798308	-0.425329	0.000359651	-0.473996	-0.349482	-0.23305	-0.293731	-0.359241	-0.397628	-0.259053	-0.528943	-0.449202	-0.527076
clust2	ENSG00000242574	1.41372	2.51746	2.34936	-0.594436	-0.594436	-0.594436	-0.450986	-0.0350943	-0.442944	-0.594436	-0.178877	-0.456504	-0.594436	-0.34395	-0.445287	-0.594436	-0.153159	-0.207126
clust2	ENSG00000104888	1.3785	2.46008	2.45204	-0.534005	-0.530024	-0.567386	-0.475551	0.0643309	-0.308173	-0.537905	-0.417845	-0.541028	-0.363199	-0.546377	-0.569256	-0.300291	-0.343665	-0.320247
clust2	ENSG00000117013	1.39622	2.42562	2.47693	-0.507743	-0.540577	-0.473794	-0.278749	0.0724782	-0.207927	-0.419201	-0.423015	-0.511103	-0.482201	-0.540577	-0.540577	-0.510611	-0.477316	-0.457859
clust2	ENSG00000160973	1.48402	2.42801	2.4806	-0.464001	-0.323993	-0.392961	-0.464001	-0.399447	-0.464001	-0.377756	-0.442208	-0.401461	-0.421867	-0.406718	-0.464001	-0.442214	-0.464001	-0.464001
clust2	ENSG00000162344	1.51853	2.41162	2.47439	-0.445579	-0.445579	-0.445579	-0.445579	-0.308701	-0.407497	-0.445579	-0.376099	-0.410874	-0.445579	-0.445579	-0.445579	-0.445579	-0.445579	-0.445579
clust2	ENSG00000205744	1.55827	2.37358	2.48548	-0.433144	-0.411188	-0.453091	-0.416088	-0.416322	-0.338956	-0.379279	-0.434882	-0.435186	-0.453091	-0.453091	-0.453091	-0.453091	-0.43374	-0.453091
clust2	ENSG00000165623	1.51764	2.41352	2.47675	-0.427194	-0.427194	-0.427194	-0.427194	-0.427194	-0.427194	-0.427194	-0.427194	-0.427194	-0.427194	-0.427194	-0.427194	-0.427194	-0.427194	-0.427194
clust2	ENSG00000124780	1.58361	2.42862	2.41637	-0.428573	-0.428573	-0.428573	-0.428573	-0.428573	-0.428573	-0.428573	-0.428573	-0.428573	-0.428573	-0.428573	-0.428573	-0.428573	-0.428573	-0.428573
clust2	ENSG00000173673	1.59809	2.39207	2.44245	-0.42884	-0.42884	-0.42884	-0.42884	-0.42884	-0.42884	-0.42884	-0.42884	-0.42884	-0.42884	-0.42884	-0.42884	-0.42884	-0.42884	-0.42884
clust2	ENSG00000105707	1.45555	2.51111	2.4151	-0.461175	-0.461175	-0.331928	-0.38906	-0.436869	-0.409993	-0.436463	-0.323522	-0.437652	-0.461175	-0.461175	-0.435744	-0.461175	-0.435756	-0.438895
clust2	ENSG00000182107	1.57204	2.47347	2.37596	-0.406899	-0.443758	-0.316274	-0.443758	-0.409549	-0.407415	-0.443758	-0.443758	-0.443758	-0.443758	-0.443758	-0.443758	-0.443758	-0.443758	-0.443758
clust2	ENSG00000117154	1.55832	2.51017	2.35003	-0.435074	-0.435074	-0.411758	-0.413823	-0.413958	-0.435074	-0.413605	-0.435074	-0.414638	-0.435074	-0.435074	-0.435074	-0.435074	-0.435074	-0.435074
clust2	ENSG00000151650	1.53248	2.47602	2.4032	-0.439989	-0.439989	-0.398581	-0.439989	-0.439989	-0.439989	-0.401854	-0.439989	-0.439989	-0.4038	-0.40682	-0.439989	-0.439989	-0.400768	-0.439989
clust2	ENSG00000159166	1.53174	2.46983	2.40716	-0.398707	-0.448711	-0.448711	-0.448711	-0.448711	-0.448711	-0.356006	-0.380762	-0.448711	-0.448711	-0.448711	-0.448711	-0.337425	-0.448711	-0.448711
clust2	ENSG00000134595	1.46753	2.4926	2.42828	-0.454745	-0.454745	-0.352737	-0.454745	-0.430573	-0.429067	-0.454745	-0.454745	-0.454745	-0.408726	-0.412512	-0.357847	-0.43096	-0.404934	-0.432578
clust2	ENSG00000142698	1.45175	2.50145	2.43191	-0.43246	-0.43246	-0.43246	-0.43246	-0.412193	-0.43246	-0.43246	-0.43246	-0.43246	-0.43246	-0.43246	-0.43246	-0.392923	-0.390461	-0.43246
clust2	ENSG00000100341	1.42448	2.43748	2.51386	-0.425054	-0.425054	-0.425054	-0.425054	-0.425054	-0.425054	-0.425054	-0.425054	-0.425054	-0.425054	-0.425054	-0.425054	-0.425054	-0.425054	-0.425054
clust2	ENSG00000119411	1.38304	2.50875	2.46877	-0.427877	-0.427877	-0.427877	-0.427877	-0.427877	-0.427877	-0.427877	-0.398838	-0.399321	-0.427877	-0.427877	-0.427877	-0.427877	-0.427877	-0.427877
clust2	ENSG00000253313	1.40934	2.50389	2.45736	-0.424707	-0.424707	-0.424707	-0.424707	-0.424707	-0.424707	-0.424707	-0.424707	-0.424707	-0.424707	-0.424707	-0.424707	-0.424707	-0.424707	-0.424707
clust2	ENSG00000137078	1.57984	2.41345	2.42297	-0.449318	-0.449318	-0.449318	-0.449318	-0.449318	-0.449318	-0.449318	-0.449318	-0.449318	-0.449318	-0.449318	-0.449318	-0.384235	-0.190888	-0.449318
clust2	ENSG00000165215	1.65113	2.41516	2.37314	-0.47259	-0.422625	-0.47259	-0.386193	-0.386723	-0.339103	-0.47259	-0.47259	-0.47259	-0.47259	-0.47259	-0.47259	-0.42938	-0.301041	-0.393645
clust2	ENSG00000223572	1.72198	2.33511	2.39614	-0.490511	-0.451225	-0.452461	-0.455828	-0.490511	-0.490511	-0.421186	-0.358943	-0.361071	-0.300658	-0.490511	-0.490511	-0.390864	-0.317927	-0.490511
clust2	ENSG00000132698	1.70125	2.37582	2.37414	-0.460486	-0.370369	-0.459755	-0.383691	-0.462639	-0.460905	-0.28768	-0.490556	-0.437395	-0.490556	-0.37408	-0.490556	-0.385947	-0.406038	-0.490556
clust2	ENSG00000149418	1.6658	2.38857	2.38863	-0.420038	-0.47379	-0.47379	-0.47379	-0.4077	-0.455851	-0.268367	-0.377512	-0.364009	-0.47379	-0.47379	-0.47379	-0.457182	-0.421617	-0.427984
clust2	ENSG00000170608	1.67121	2.42831	2.34726	-0.428085	-0.424806	-0.426695	-0.485943	-0.485943	-0.374989	-0.354708	-0.358676	-0.433889	-0.434053	-0.485943	-0.376623	-0.433036	-0.457453	-0.485943
clust2	ENSG00000181885	1.6918	2.35253	2.40909	-0.464502	-0.464502	-0.440146	-0.464502	-0.33942	-0.374118	-0.398786	-0.442787	-0.443148	-0.382162	-0.444993	-0.464502	-0.400853	-0.464502	-0.464502
clust2	ENSG00000125850	1.62951	2.36459	2.44509	-0.436441	-0.436441	-0.436441	-0.436441	-0.436441	-0.436441	-0.436441	-0.436441	-0.436441	-0.436441	-0.436441	-0.436441	-0.329012	-0.436441	-0.436441
clust2	ENSG00000133477	1.68649	2.36483	2.40178	-0.437458	-0.383455	-0.458576	-0.4465	-0.466675	-0.444994	-0.393074	-0.414747	-0.409422	-0.473391	-0.473391	-0.473391	-0.364187	-0.424765	-0.389078
clust2	ENSG00000168004	1.63766	2.43448	2.36818	-0.454372	-0.454372	-0.367481	-0.454372	-0.454372	-0.454372	-0.374247	-0.376764	-0.378038	-0.454372	-0.454372	-0.454372	-0.42805	-0.426395	-0.454372
clust2	ENSG00000156959	1.66333	2.35153	2.4321	-0.416458	-0.453194	-0.43426	-0.453194	-0.453194	-0.453194	-0.351498	-0.436326	-0.356282	-0.453194	-0.453194	-0.453194	-0.453194	-0.435267	-0.391314
clust2	ENSG00000142273	1.62361	2.41504	2.40037	-0.401126	-0.43836	-0.43836	-0.43836	-0.43836	-0.43836	-0.43836	-0.43836	-0.37258	-0.405001	-0.43836	-0.43836	-0.43836	-0.43836	-0.43836
clust2	ENSG00000143365	1.6615	2.36679	2.42163	-0.429995	-0.429995	-0.429995	-0.429995	-0.429995	-0.429995	-0.429995	-0.429995	-0.429995	-0.429995	-0.429995	-0.429995	-0.429995	-0.429995	-0.429995
clust2	ENSG00000182866	1.69906	2.371	2.38907	-0.434861	-0.434861	-0.434861	-0.434861	-0.434861	-0.434861	-0.383062	-0.434861	-0.434861	-0.434861	-0.434861	-0.434861	-0.434861	-0.434861	-0.42287
clust2	ENSG00000078900	1.67198	2.47068	2.28713	-0.388917	-0.207724	-0.420174	-0.366609	-0.525957	-0.457763	-0.428526	-0.339693	-0.402797	-0.525957	-0.469233	-0.525957	-0.525957	-0.492247	-0.352276
clust2	ENSG00000133019	1.57096	2.29837	2.52904	-0.354472	-0.48403	-0.394466	-0.452947	-0.524547	-0.37216	-0.409137	-0.215389	-0.285465	-0.471825	-0.506036	-0.551905	-0.525475	-0.462611	-0.387907
clust2	ENSG00000204252	1.56894	2.41005	2.42991	-0.391605	-0.314981	-0.501258	-0.403123	-0.416607	-0.368353	-0.376687	-0.280957	-0.385633	-0.510934	-0.541378	-0.505269	-0.406774	-0.491058	-0.514276
clust2	ENSG00000145113	1.59004	2.38052	2.44923	-0.377645	-0.4501	-0.343464	-0.415036	-0.472393	-0.424428	-0.272697	-0.403387	-0.418883	-0.419193	-0.49002	-0.425832	-0.515358	-0.515358	-0.475989
clust2	ENSG00000277200	1.60682	2.28864	2.52499	-0.380999	-0.316139	-0.418302	-0.4422	-0.461052	-0.479906	-0.264996	-0.443029	-0.408258	-0.479906	-0.479906	-0.479906	-0.443039	-0.460187	-0.462627
clust2	ENSG00000283567	1.44252	2.59727	2.30009	-0.126848	-0.292437	-0.495913	-0.495913	-0.495913	-0.495913	-0.402821	-0.236434	-0.322219	-0.495913	-0.495913	-0.495913	-0.495913	-0.495913	-0.495913
clust2	ENSG00000185436	1.49779	2.58472	2.29612	-0.453321	-0.425176	-0.42823	-0.436562	-0.523633	-0.454302	-0.351806	-0.222976	-0.379471	-0.523633	-0.523633	-0.500589	-0.357149	-0.41129	-0.386865
clust2	ENSG00000167759	1.46969	2.56382	2.33463	-0.274573	-0.480511	-0.480511	-0.480511	-0.480511	-0.411172	-0.349337	-0.292036	-0.235914	-0.480511	-0.480511	-0.480511	-0.480511	-0.480511	-0.480511
clust2	ENSG00000182795	1.36735	2.71108	2.24626	-0.369573	-0.476039	-0.439252	-0.476039	-0.442738	-0.405653	-0.408692	-0.284486	-0.257311	-0.476039	-0.417471	-0.476039	-0.443275	-0.476039	-0.476039
clust2	ENSG00000052344	1.34318	2.47121	2.49611	-0.395496	-0.50411	-0.423121	-0.473605	-0.488802	-0.487844	-0.176894	-0.32827	-0.123588	-0.50411	-0.50411	-0.50411	-0.445573	-0.488103	-0.462764
clust2	ENSG00000134917	1.5274	2.44023	2.4199	-0.346227	-0.456936	-0.418861	-0.374518	-0.44641	-0.481021	-0.271805	-0.295072	-0.236933	-0.521438	-0.521438	-0.521438	-0.521438	-0.521438	-0.452553
clust2	ENSG00000117595	1.35609	2.46049	2.51108	-0.540609	-0.458231	-0.460805	-0.374579	-0.398386	-0.365591	-0.30502	-0.312217	-0.21201	-0.403291	-0.540609	-0.540609	-0.469432	-0.515097	-0.431177
clust2	ENSG00000188910	1.39301	2.42147	2.51477	-0.488896	-0.488896	-0.488896	-0.488896	-0.488896	-0.188137	-0.200936	-0.347736	-0.214585	-0.488896	-0.488896	-0.488896	-0.488896	-0.488896	-0.488896
clust2	ENSG00000148600	1.37967	2.57989	2.36252	-0.563252	-0.456816	-0.533159	-0.508829	-0.522537	-0.423016	-0.244896	-0.265683	-0.214965	-0.375093	-0.446014	-0.272532	-0.471159	-0.534755	-0.48937
clust2	ENSG00000109158	1.51635	2.46238	2.42199	-0.456824	-0.456824	-0.456824	-0.456824	-0.456824	-0.456824	-0.321347	-0.456824	-0.456824	-0.328307	-0.339094	-0.386914	-0.456824	-0.456824	-0.456824
clust2	ENSG00000130545	1.55283	2.44305	2.39532	-0.424931	-0.470943	-0.524735	-0.524735	-0.477496	-0.474565	-0.146448	-0.390037	-0.434858	-0.272887	-0.365171	-0.475332	-0.524735	-0.524735	-0.359587
clust2	ENSG00000006740	1.38286	2.55302	2.34386	-0.558562	-0.377675	-0.558402	-0.657745	-0.69062	-0.514253	-0.232408	-0.319555	-0.241301	-0.530784	-0.630217	-0.263918	-0.303144	-0.213281	-0.187882
clust2	ENSG00000187554	1.32685	2.59063	2.38092	-0.514882	-0.462264	-0.513704	-0.562823	-0.518348	-0.378263	-0.301624	-0.28957	-0.196914	-0.519922	-0.562823	-0.539461	-0.289647	-0.359212	-0.288941
clust2	ENSG00000124827	1.47712	2.67543	2.18	-0.484627	-0.484627	-0.157976	-0.484627	-0.484627	-0.484627	-0.183806	-0.484627	-0.484627	-0.484627	-0.484627	-0.484627	-0.484627	-0.175234	-0.484627
clust2	ENSG00000146038	1.39547	2.4528	2.48232	-0.518346	-0.518346	-0.518346	-0.367695	-0.36865	-0.359298	-0.217571	-0.371008	-0.518346	-0.518346	-0.518346	-0.439556	-0.444266	-0.134119	-0.518346
clust2	ENSG00000176387	1.42209	2.56436	2.36857	-0.485463	-0.513183	-0.484785	-0.461981	-0.34416	-0.459157	-0.364522	-0.513183	-0.463921	-0.513183	-0.383024	-0.434274	-0.391868	-0.225754	-0.316565
clust2	ENSG00000198822	1.69591	2.28993	2.40801	-0.461004	-0.450531	-0.549007	-0.0673867	-0.642818	-0.55255	-0.387209	-0.395296	-0.320276	-0.400159	-0.642818	-0.466305	-0.314988	-0.553989	-0.189521
clust2	ENSG00000083454	1.55591	2.17954	2.62024	-0.340337	-0.576299	-0.576299	-0.0472154	-0.410671	-0.51676	-0.299741	-0.521163	-0.363972	-0.576299	-0.477917	-0.459959	-0.466854	-0.347215	-0.374981
clust2	ENSG00000273079	1.38946	2.34468	2.59291	-0.414191	-0.494514	-0.525069	-0.345896	-0.424316	-0.498577	-0.474651	-0.275033	-0.20588	-0.553802	-0.553802	-0.553802	-0.275114	-0.391439	-0.340974
clust2	ENSG00000102575	1.59366	2.55305	2.23877	-0.0723624	-0.505075	-0.426928	-0.332188	-0.510248	-0.547045	-0.330054	-0.51083	-0.476297	-0.511551	-0.357625	-0.547045	-0.405088	-0.470623	-0.38253
clust2	ENSG00000165863	1.56871	2.54715	2.28226	-0.473444	-0.515214	-0.430771	-0.364684	-0.330334	-0.394775	-0.292392	-0.47706	-0.477695	-0.515214	-0.515214	-0.515214	-0.439837	-0.435174	-0.221102
clust2	ENSG00000109832	1.51544	2.62267	2.24767	-0.397484	-0.4143	-0.33426	-0.509244	-0.418914	-0.387856	-0.462378	-0.420858	-0.46629	-0.466539	-0.513529	-0.519975	-0.388399	-0.356228	-0.329522
clust2	ENSG00000144229	1.70629	2.55277	2.18108	-0.434103	-0.461852	-0.462851	-0.43803	-0.357727	-0.321333	-0.437463	-0.439251	-0.493351	-0.493351	-0.493351	-0.493351	-0.386116	-0.407522	-0.320488
clust2	ENSG00000175707	1.61398	2.54619	2.26363	-0.42082	-0.338357	-0.460792	-0.423451	-0.286129	-0.421379	-0.423071	-0.424269	-0.460792	-0.460792	-0.460792	-0.460792	-0.460792	-0.460792	-0.460792
clust2	ENSG00000157992	1.53019	2.43755	2.38692	-0.437342	-0.402887	-0.38752	-0.411987	-0.481543	-0.55457	-0.5416	-0.247428	-0.714236	-0.640624	-0.402314	-0.262418	-0.425824	-0.323968	-0.120395
clust2	ENSG00000198598	1.31839	2.48701	2.49084	-0.404606	-0.348761	-0.615365	-0.285924	-0.334739	-0.553232	-0.588301	-0.387599	-0.592039	-0.455104	-0.508059	-0.425047	-0.216828	-0.297165	-0.283478
clust2	ENSG00000011347	1.20851	2.5635	2.4814	-0.383201	-0.475236	-0.440812	-0.256134	-0.388776	-0.410702	-0.47949	-0.496052	-0.486591	-0.534063	-0.620795	-0.513107	-0.202967	-0.354988	-0.210505
clust2	ENSG00000203685	1.25554	2.64387	2.36867	-0.515155	-0.515155	-0.515155	-0.270068	-0.432136	-0.456112	-0.294303	-0.379976	-0.488173	-0.515155	-0.515155	-0.515155	-0.249728	-0.457052	-0.149604
clust2	ENSG00000184731	1.58598	2.29948	2.36603	-0.169474	-0.513783	-0.451218	-0.102649	0.0323546	-0.0225257	-0.367452	-0.454575	-0.506214	-0.804049	-0.804049	-0.804049	-0.454666	-0.451499	-0.377639
clust2	ENSG00000068831	1.6907	2.34859	2.26001	-0.549269	-0.594065	-0.621676	0.0921642	-0.0417488	0.0108785	-0.284525	-0.454224	-0.362585	-0.649443	-0.598755	-0.623731	-0.515843	-0.540999	-0.565473
clust2	ENSG00000186205	1.68609	2.2414	2.44005	-0.533295	-0.554921	-0.60602	-0.0545319	-0.11699	-0.190068	-0.257396	-0.42702	-0.575014	-0.605034	-0.528286	-0.603104	-0.408393	-0.467699	-0.439758
clust2	ENSG00000102445	1.45483	2.04301	2.72916	-0.611959	-0.682907	-0.609748	0.00395221	-0.298631	-0.209492	-0.435427	-0.428125	-0.341233	-0.669687	-0.642875	-0.597293	-0.199734	-0.394849	-0.108991
clust2	ENSG00000157103	1.40417	2.27767	2.51148	-0.610838	-0.610838	-0.610838	0.013518	0.00954499	-0.0824849	-0.610838	-0.487931	-0.0104619	-0.610838	-0.610838	-0.610838	-0.610838	-0.480183	-0.268623
clust2	ENSG00000262179	1.44703	2.47297	2.2861	-0.133997	-0.491581	-0.363419	0.0353116	-0.638772	0.162813	-0.507127	-0.638772	-0.180203	-0.638772	-0.638772	-0.638772	-0.391812	-0.503462	-0.638772
clust2	ENSG00000140675	1.4763	2.42846	2.41473	-0.530676	-0.157467	-0.528883	-0.20829	-0.33831	-0.0552938	-0.466972	-0.471322	-0.47352	-0.53835	-0.603599	-0.25924	-0.603599	-0.603599	-0.480362
clust2	ENSG00000156076	1.82079	2.24078	2.35492	-0.430662	-0.229795	-0.582218	-0.187826	-0.39675	-0.0882316	-0.264968	-0.399554	-0.582218	-0.582218	-0.582218	-0.531706	-0.488472	-0.531731	-0.537934
clust2	ENSG00000153093	1.44617	2.23955	2.63515	-0.345112	-0.438877	-0.247128	-0.160088	-0.33807	-0.230124	-0.504305	-0.511213	-0.548982	-0.335111	-0.440399	-0.443714	-0.65341	-0.5165	-0.60783
clust2	ENSG00000176532	1.38515	2.3081	2.58672	-0.456837	-0.446507	-0.452453	-0.13382	-0.239698	-0.10953	-0.598779	-0.245377	-0.286386	-0.516386	-0.565336	-0.505865	-0.432209	-0.645391	-0.645391
clust2	ENSG00000125731	1.34341	2.46188	2.50342	-0.496123	-0.3344	-0.266791	-0.271119	-0.283426	-0.302554	-0.338997	-0.380823	-0.385802	-0.60077	-0.644473	-0.477707	-0.468104	-0.552441	-0.505177
clust2	ENSG00000124493	1.44185	2.49682	2.4153	-0.510457	-0.479132	-0.495325	-0.242912	-0.239017	-0.239522	-0.389549	-0.388142	-0.402488	-0.532559	-0.527245	-0.532012	-0.480934	-0.490834	-0.403831
clust2	ENSG00000141738	1.52431	2.34459	2.51081	-0.355841	-0.484252	-0.426356	-0.211492	-0.257357	-0.258121	-0.452037	-0.472068	-0.388478	-0.526866	-0.510195	-0.526866	-0.526866	-0.507142	-0.475775
clust2	ENSG00000101443	1.76731	2.36115	2.29718	-0.5672	-0.242333	-0.521363	-0.485329	-0.341617	-0.5672	-0.182575	-0.378413	-0.226191	-0.527085	-0.530403	-0.5672	-0.5672	-0.298398	-0.423131
clust2	ENSG00000129354	1.84407	2.31203	2.30637	-0.239564	-0.270522	-0.395557	-0.527189	-0.398965	-0.430385	-0.383149	-0.513199	-0.367618	-0.594224	-0.507379	-0.594224	-0.441291	-0.432712	-0.366487
clust2	ENSG00000156966	1.91809	2.23013	2.328	-0.256856	-0.341166	-0.347968	-0.410843	-0.336525	-0.344777	-0.397867	-0.460068	-0.417002	-0.560231	-0.550598	-0.586583	-0.448446	-0.503701	-0.513581
clust2	ENSG00000077009	1.84318	2.31062	2.32465	-0.368196	-0.360469	-0.364913	-0.514761	-0.318065	-0.514761	-0.408173	-0.349778	-0.479246	-0.44559	-0.514761	-0.439975	-0.478663	-0.44001	-0.481094
clust2	ENSG00000170011	1.89535	2.19951	2.388	-0.311544	-0.410709	-0.48552	-0.452331	-0.32391	-0.48552	-0.321253	-0.48552	-0.359731	-0.453712	-0.48552	-0.48552	-0.48552	-0.451027	-0.48552
clust2	ENSG00000113396	1.84771	2.27488	2.31451	-0.463078	-0.362765	-0.316992	-0.34624	-0.373279	-0.355761	-0.245202	-0.377723	-0.196621	-0.407985	-0.476146	-0.679322	-0.591262	-0.647545	-0.597176
clust2	ENSG00000212993	1.74367	2.22459	2.46333	-0.41141	-0.354471	-0.320033	-0.319583	-0.308821	-0.239379	-0.342513	-0.442956	-0.406295	-0.529334	-0.486269	-0.505565	-0.586705	-0.616446	-0.561805
clust2	ENSG00000142449	1.50037	2.46421	2.39841	-0.222304	-0.478519	-0.349333	-0.331904	-0.402621	-0.374025	-0.335873	-0.371684	-0.342676	-0.641105	-0.641105	-0.641105	-0.351504	-0.444898	-0.434339
clust2	ENSG00000185670	1.73869	2.33375	2.328	-0.23328	-0.4874	-0.235543	-0.285972	-0.290793	-0.330033	-0.278238	-0.440261	-0.36614	-0.764098	-0.533358	-0.736542	-0.485843	-0.444739	-0.488196
clust2	ENSG00000105699	1.69467	2.39383	2.34225	-0.39596	-0.430834	-0.353489	-0.309971	-0.206561	-0.402144	-0.42901	-0.515781	-0.530602	-0.584616	-0.604946	-0.432988	-0.466377	-0.433192	-0.334274
clust2	ENSG00000139044	1.58465	2.30302	2.49958	-0.452349	-0.37484	-0.361788	-0.45886	-0.269818	-0.308099	-0.422316	-0.388802	-0.35292	-0.654453	-0.65048	-0.620949	-0.378347	-0.282303	-0.410925
clust2	ENSG00000105131	1.69963	2.40919	2.32756	-0.513585	-0.480692	-0.45336	-0.247984	-0.292903	-0.279002	-0.46031	-0.462901	-0.544008	-0.544008	-0.519031	-0.378913	-0.412397	-0.378987	-0.4683
clust2	ENSG00000169418	1.6867	2.48027	2.25794	-0.470545	-0.447592	-0.505896	-0.201568	-0.303341	-0.213677	-0.508909	-0.412673	-0.446016	-0.47815	-0.468874	-0.507891	-0.49335	-0.438332	-0.528093
clust2	ENSG00000151789	1.79388	2.41807	2.22223	-0.518113	-0.590616	-0.497992	-0.217015	-0.281298	-0.279129	-0.389065	-0.379581	-0.429934	-0.590616	-0.590616	-0.590616	-0.270757	-0.400246	-0.408586
clust2	ENSG00000157064	1.75293	2.40347	2.26955	-0.643098	-0.557981	-0.578647	-0.261644	-0.299251	-0.238262	-0.328832	-0.225988	-0.394053	-0.50641	-0.56066	-0.460732	-0.48909	-0.447408	-0.433892
clust2	ENSG00000103067	1.84168	2.3317	2.2978	-0.366136	-0.484144	-0.422088	-0.46391	-0.464207	-0.485985	-0.262264	-0.297944	-0.291733	-0.499729	-0.459442	-0.511274	-0.487854	-0.474163	-0.500305
clust2	ENSG00000140284	1.74197	2.53959	2.16284	-0.468677	-0.468677	-0.468677	-0.468677	-0.468677	-0.468677	-0.280281	-0.286061	-0.323523	-0.468677	-0.434514	-0.468677	-0.468677	-0.468677	-0.433251
clust2	ENSG00000005001	1.86628	2.38669	2.22184	-0.46452	-0.46452	-0.46452	-0.46452	-0.46452	-0.46452	-0.361532	-0.46452	-0.366472	-0.46452	-0.46452	-0.46452	-0.172565	-0.46452	-0.46452
clust2	ENSG00000127831	1.7953	2.49783	2.17652	-0.450705	-0.450705	-0.450705	-0.450705	-0.450705	-0.415517	-0.450705	-0.3538	-0.418673	-0.450705	-0.421459	-0.416062	-0.418137	-0.450705	-0.420372
clust2	ENSG00000171759	1.85616	2.50317	2.11584	-0.422063	-0.42025	-0.421295	-0.424138	-0.453213	-0.453213	-0.365811	-0.453213	-0.342698	-0.453213	-0.453213	-0.453213	-0.453213	-0.453213	-0.453213
clust2	ENSG00000112164	1.82513	2.43905	2.2177	-0.434943	-0.434943	-0.434943	-0.434943	-0.434943	-0.434943	-0.414108	-0.434943	-0.434943	-0.434943	-0.434943	-0.434943	-0.434943	-0.41351	-0.434943
clust2	ENSG00000283877	1.93886	2.39399	2.16646	-0.433288	-0.433288	-0.433288	-0.433288	-0.433288	-0.433288	-0.433288	-0.433288	-0.433288	-0.433288	-0.433288	-0.433288	-0.433288	-0.433288	-0.433288
clust2	ENSG00000248746	1.80436	2.35735	2.30942	-0.51697	-0.499217	-0.450087	-0.384909	-0.372227	-0.283049	-0.485585	-0.442841	-0.487084	-0.403309	-0.463144	-0.468961	-0.48659	-0.380072	-0.347077
clust2	ENSG00000126583	1.87212	2.31206	2.30056	-0.492701	-0.508505	-0.307075	-0.447427	-0.356759	-0.425409	-0.462641	-0.449557	-0.362475	-0.482503	-0.517183	-0.460249	-0.359609	-0.411108	-0.441535
clust2	ENSG00000133980	1.79168	2.33904	2.34919	-0.433923	-0.433923	-0.433923	-0.433923	-0.433923	-0.433923	-0.433923	-0.433923	-0.433923	-0.404996	-0.433923	-0.433923	-0.433923	-0.433923	-0.433923
clust2	ENSG00000083307	1.87213	2.31877	2.30205	-0.446823	-0.446823	-0.446823	-0.434262	-0.446823	-0.446823	-0.40913	-0.410328	-0.446823	-0.434785	-0.424864	-0.446823	-0.446823	-0.358167	-0.446823
clust2	ENSG00000130182	1.93515	2.28158	2.28662	-0.438659	-0.438659	-0.438659	-0.438659	-0.428357	-0.438659	-0.438659	-0.438659	-0.409259	-0.428721	-0.411766	-0.438659	-0.438659	-0.438659	-0.438659
clust2	ENSG00000226792	1.90672	2.26731	2.3249	-0.438941	-0.438941	-0.438941	-0.438941	-0.438941	-0.384699	-0.438941	-0.438941	-0.428726	-0.438941	-0.438941	-0.438941	-0.438941	-0.427902	-0.429266
clust2	ENSG00000248329	1.87755	2.29475	2.32298	-0.433842	-0.433842	-0.433842	-0.433842	-0.421481	-0.433842	-0.433842	-0.433842	-0.433842	-0.433842	-0.433842	-0.433842	-0.433842	-0.433842	-0.433842
clust2	ENSG00000130768	1.87877	2.31782	2.27202	-0.480211	-0.399846	-0.53965	-0.415239	-0.352722	-0.251321	-0.30482	-0.450858	-0.234294	-0.469259	-0.53965	-0.519958	-0.521129	-0.500736	-0.488907
clust2	ENSG00000165905	1.74298	2.37268	2.34373	-0.404755	-0.456094	-0.31351	-0.375516	-0.37635	-0.355957	-0.386186	-0.438793	-0.380565	-0.518399	-0.505936	-0.475002	-0.504528	-0.475022	-0.492773
clust2	ENSG00000205517	1.83774	2.41716	2.21876	-0.49241	-0.346691	-0.44315	-0.311951	-0.392748	-0.445577	-0.419203	-0.421982	-0.306566	-0.508788	-0.443238	-0.47722	-0.508788	-0.446563	-0.508788
clust2	ENSG00000007312	1.99461	2.3313	2.10193	-0.507044	-0.507044	-0.181887	-0.507044	-0.507044	-0.507044	-0.507044	-0.507044	0.0557355	-0.507044	-0.507044	-0.507044	-0.217154	-0.507044	-0.507044
clust2	ENSG00000137393	1.90378	2.25456	2.30204	-0.513885	-0.575766	-0.491777	-0.390376	-0.289988	-0.455885	-0.406365	-0.199745	-0.23589	-0.538606	-0.575766	-0.575766	-0.343544	-0.476843	-0.390181
clust2	ENSG00000111913	2.0514	2.23937	2.17981	-0.574209	-0.537955	-0.542605	-0.396841	-0.372446	-0.364251	-0.313142	-0.272751	-0.356636	-0.602075	-0.614532	-0.588805	-0.265304	-0.368754	-0.300274
clust2	ENSG00000130477	1.93407	2.2891	2.24951	-0.569537	-0.587277	-0.572964	-0.441797	-0.401256	-0.370401	-0.295419	-0.365226	-0.310014	-0.573182	-0.48075	-0.512564	-0.349918	-0.309942	-0.332431
clust2	ENSG00000177807	2.03716	2.35567	2.08928	-0.550044	-0.550044	-0.482521	-0.367266	-0.250162	-0.485077	-0.487898	-0.371276	-0.550044	-0.432684	-0.336742	-0.486084	-0.371328	-0.486115	-0.274821
clust2	ENSG00000112280	2.00148	2.17675	2.31378	-0.464183	-0.512851	-0.500744	-0.345553	-0.325178	-0.381478	-0.39942	-0.371158	-0.406021	-0.539883	-0.539883	-0.539883	-0.317947	-0.37241	-0.475418
clust2	ENSG00000179023	1.93481	2.28478	2.27288	-0.477333	-0.504059	-0.49028	-0.308747	-0.37439	-0.355064	-0.395086	-0.444067	-0.468255	-0.504059	-0.504059	-0.504059	-0.3655	-0.392105	-0.405405
clust2	ENSG00000164362	1.98704	2.32975	2.18094	-0.406361	-0.478048	-0.404624	-0.478048	-0.461155	-0.460092	-0.478048	-0.478048	-0.445514	-0.478048	-0.478048	-0.478048	-0.318878	-0.325401	-0.329371
clust2	ENSG00000183742	1.99707	2.32275	2.18382	-0.455157	-0.455157	-0.455157	-0.438054	-0.455157	-0.419143	-0.455157	-0.42181	-0.455157	-0.455157	-0.455157	-0.455157	-0.42182	-0.282294	-0.424104
clust2	ENSG00000196218	1.96156	2.26493	2.27398	-0.308143	-0.388304	-0.355838	-0.433426	-0.433786	-0.460155	-0.444233	-0.468011	-0.468389	-0.490637	-0.465281	-0.484588	-0.418293	-0.442915	-0.438484
clust2	ENSG00000177511	1.98682	2.18877	2.32982	-0.453967	-0.453967	-0.453967	-0.424104	-0.380422	-0.438149	-0.453967	-0.453967	-0.425253	-0.453967	-0.427747	-0.453967	-0.353217	-0.438402	-0.440334
clust2	ENSG00000161940	2.04052	2.19051	2.27721	-0.362346	-0.427669	-0.464075	-0.464075	-0.432156	-0.464075	-0.368049	-0.464075	-0.464075	-0.464075	-0.407998	-0.464075	-0.464075	-0.333341	-0.464075
clust2	ENSG00000075388	1.99367	2.25717	2.2594	-0.434016	-0.434016	-0.434016	-0.434016	-0.434016	-0.434016	-0.434016	-0.434016	-0.434016	-0.434016	-0.434016	-0.434016	-0.434016	-0.434016	-0.434016
clust2	ENSG00000196542	2.00497	2.27942	2.22609	-0.440677	-0.440677	-0.440677	-0.440677	-0.440677	-0.440677	-0.440677	-0.440677	-0.440677	-0.440677	-0.440677	-0.440677	-0.423676	-0.404832	-0.393843
clust2	ENSG00000178394	2.04764	2.19124	2.27496	-0.436952	-0.436952	-0.436952	-0.436952	-0.436952	-0.436952	-0.436952	-0.39651	-0.436952	-0.436952	-0.436952	-0.436952	-0.436952	-0.436952	-0.436952
clust2	ENSG00000241186	2.09091	2.21074	2.21535	-0.439427	-0.439427	-0.439427	-0.439427	-0.439427	-0.439427	-0.41747	-0.407891	-0.418512	-0.439427	-0.439427	-0.439427	-0.439427	-0.439427	-0.439427
clust2	ENSG00000111704	2.09366	2.19174	2.23176	-0.429535	-0.438407	-0.438407	-0.430125	-0.438407	-0.421017	-0.438407	-0.438407	-0.438407	-0.422618	-0.438407	-0.438407	-0.438407	-0.4298	-0.438407
clust2	ENSG00000147596	2.07368	2.21836	2.22431	-0.435699	-0.435699	-0.435699	-0.416556	-0.435699	-0.435699	-0.435699	-0.435699	-0.435699	-0.435699	-0.435699	-0.435699	-0.435699	-0.435699	-0.435699
clust2	ENSG00000204531	2.05786	2.23309	2.22378	-0.427971	-0.400744	-0.43641	-0.445477	-0.445477	-0.445477	-0.445477	-0.437394	-0.445477	-0.445477	-0.445477	-0.436885	-0.399308	-0.412196	-0.445477
clust2	ENSG00000140955	2.07265	2.25524	2.18804	-0.434395	-0.434395	-0.434395	-0.434395	-0.434395	-0.434395	-0.434395	-0.434395	-0.434395	-0.434395	-0.434395	-0.434395	-0.434395	-0.434395	-0.434395
clust2	ENSG00000225366	2.11287	2.22413	2.181	-0.434533	-0.434533	-0.434533	-0.434533	-0.434533	-0.434533	-0.434533	-0.434533	-0.434533	-0.434533	-0.434533	-0.434533	-0.434533	-0.434533	-0.434533
clust2	ENSG00000229544	2.09828	2.2311	2.18806	-0.434496	-0.434496	-0.434496	-0.434496	-0.434496	-0.434496	-0.434496	-0.434496	-0.434496	-0.434496	-0.434496	-0.434496	-0.434496	-0.434496	-0.434496
clust2	ENSG00000163377	2.0412	2.27117	2.18421	-0.52088	-0.292485	-0.52088	-0.52088	-0.485785	-0.483586	-0.450172	-0.419079	-0.3568	-0.487025	-0.52088	-0.378064	-0.354157	-0.310573	-0.395328
clust2	ENSG00000167634	2.02709	2.34765	2.12955	-0.449332	-0.449332	-0.449332	-0.449332	-0.449332	-0.449332	-0.449332	-0.449332	-0.3313	-0.33168	-0.449332	-0.449332	-0.449332	-0.449332	-0.449332
clust2	ENSG00000255192	2.05077	2.22038	2.23364	-0.430087	-0.488508	-0.346	-0.460765	-0.46094	-0.488508	-0.460482	-0.409506	-0.386333	-0.339846	-0.46412	-0.304178	-0.488508	-0.488508	-0.488508
clust2	ENSG00000105205	2.18415	2.24297	2.08744	-0.441826	-0.441826	-0.441826	-0.441826	-0.441826	-0.441826	-0.441826	-0.441826	-0.441826	-0.441826	-0.441826	-0.441826	-0.328999	-0.441826	-0.441826
clust2	ENSG00000188848	2.26129	2.12894	2.12522	-0.432393	-0.450665	-0.425797	-0.450665	-0.422596	-0.450665	-0.444879	-0.445065	-0.428858	-0.450665	-0.450665	-0.450665	-0.4069	-0.438804	-0.366183
clust2	ENSG00000175077	2.17968	2.11224	2.22509	-0.439347	-0.439347	-0.439347	-0.439347	-0.439347	-0.439347	-0.439347	-0.439347	-0.439347	-0.439347	-0.439347	-0.439347	-0.366142	-0.439347	-0.439347
clust2	ENSG00000132297	2.22715	2.12247	2.16852	-0.434543	-0.434543	-0.434543	-0.434543	-0.434543	-0.434543	-0.434543	-0.434543	-0.434543	-0.434543	-0.434543	-0.434543	-0.434543	-0.434543	-0.434543
clust2	ENSG00000166105	2.21188	2.12439	2.18212	-0.436967	-0.436967	-0.436967	-0.436967	-0.436967	-0.436967	-0.427516	-0.42782	-0.427973	-0.436967	-0.436967	-0.436967	-0.436967	-0.436967	-0.42845
clust2	ENSG00000166535	2.15799	2.18011	2.16903	-0.376163	-0.351753	-0.474443	-0.493464	-0.477757	-0.459116	-0.353322	-0.286794	-0.37499	-0.50951	-0.453787	-0.459891	-0.493824	-0.476303	-0.466017
clust2	ENSG00000173890	2.21076	2.16613	2.12777	-0.456802	-0.389357	-0.439147	-0.551747	-0.435517	-0.473167	-0.352664	-0.285054	-0.336854	-0.387302	-0.486102	-0.444839	-0.450985	-0.504686	-0.510436
clust2	ENSG00000119888	2.18319	2.12313	2.17538	-0.667864	-0.665116	-0.563266	-0.429348	-0.304354	-0.285471	-0.407065	-0.317373	-0.382174	-0.419838	-0.431244	-0.370697	-0.475459	-0.400041	-0.362392
clust2	ENSG00000196139	2.19148	2.04906	2.26099	-0.40673	-0.501926	-0.501926	-0.412954	-0.328931	-0.438843	-0.382995	-0.277939	-0.416324	-0.473066	-0.501926	-0.379611	-0.501926	-0.501926	-0.474504
clust2	ENSG00000120659	2.17536	2.0672	2.26274	-0.475264	-0.475264	-0.445755	-0.252173	-0.396774	-0.391974	-0.475264	-0.448958	-0.475264	-0.475264	-0.475264	-0.475264	-0.448965	-0.367114	-0.426737
clust2	ENSG00000183166	2.05756	2.16449	2.28604	-0.478549	-0.478549	-0.452742	-0.30877	-0.375561	-0.392993	-0.443026	-0.421571	-0.422516	-0.478549	-0.478549	-0.478549	-0.444172	-0.418028	-0.435962
clust2	ENSG00000143119	1.75674	2.27529	2.41511	-0.49578	-0.49578	-0.49578	-0.39186	-0.392518	-0.49578	-0.49578	-0.49578	-0.49578	-0.39615	-0.49578	-0.387764	-0.394171	-0.387816	-0.130628
clust2	ENSG00000185668	1.76494	2.23595	2.43581	-0.509043	-0.5353	-0.452328	-0.487155	-0.257269	-0.509828	-0.436173	-0.539424	-0.373392	-0.514905	-0.542073	-0.510676	-0.282757	-0.244642	-0.241734
clust2	ENSG00000146904	1.78703	2.33682	2.33727	-0.558162	-0.526114	-0.565987	-0.458722	-0.337497	-0.383689	-0.449731	-0.491849	-0.422527	-0.450741	-0.401058	-0.445174	-0.32911	-0.366302	-0.274463
clust2	ENSG00000134873	1.81808	2.32823	2.31906	-0.45477	-0.516477	-0.517204	-0.499198	-0.351898	-0.496963	-0.459455	-0.539524	-0.463216	-0.374983	-0.469678	-0.437499	-0.241104	-0.308534	-0.334866
clust2	ENSG00000150510	1.88947	2.27856	2.3107	-0.47625	-0.507188	-0.516509	-0.436399	-0.382381	-0.40195	-0.464528	-0.438451	-0.474853	-0.49659	-0.493004	-0.525537	-0.274426	-0.278552	-0.31211
clust2	ENSG00000185352	1.6873	2.37337	2.37065	-0.344423	-0.396156	-0.460621	-0.466055	-0.521592	-0.346913	-0.521592	-0.413355	-0.521592	-0.46837	-0.521592	-0.521592	-0.467302	-0.237148	-0.223016
clust2	ENSG00000100346	1.63943	2.39003	2.38301	-0.467285	-0.462699	-0.519248	-0.497036	-0.376947	-0.520279	-0.471778	-0.403051	-0.359405	-0.522708	-0.54645	-0.495072	-0.310047	-0.344532	-0.115934
clust2	ENSG00000261115	1.64846	2.40254	2.3711	-0.536536	-0.526824	-0.53632	-0.39747	-0.354904	-0.358798	-0.449243	-0.336791	-0.388716	-0.521934	-0.545286	-0.528351	-0.393413	-0.310027	-0.237485
clust2	ENSG00000124302	1.56104	2.45984	2.3729	-0.445591	-0.503718	-0.473631	-0.503718	-0.449746	-0.503718	-0.396072	-0.4769	-0.40111	-0.503718	-0.503718	-0.503718	-0.326074	-0.172303	-0.23005
clust2	ENSG00000140835	1.56097	2.36404	2.48112	-0.471436	-0.471436	-0.471436	-0.471436	-0.407616	-0.43714	-0.43862	-0.471436	-0.471436	-0.471436	-0.471436	-0.471436	-0.378264	-0.250845	-0.250721
clust2	ENSG00000164651	1.60274	2.32039	2.48712	-0.470056	-0.470056	-0.470056	-0.470056	-0.470056	-0.470056	-0.470056	-0.448664	-0.470056	-0.470056	-0.470056	-0.470056	-0.32702	-0.145601	-0.318348
clust2	ENSG00000101445	1.70033	2.36277	2.38614	-0.462492	-0.462492	-0.462492	-0.462492	-0.38395	-0.462492	-0.450766	-0.462492	-0.451332	-0.462492	-0.462492	-0.462492	-0.3431	-0.426654	-0.231018
clust2	ENSG00000143858	1.71394	2.34473	2.39766	-0.445066	-0.494778	-0.440943	-0.443255	-0.457248	-0.503094	-0.402735	-0.396968	-0.437336	-0.4628	-0.498792	-0.396738	-0.336366	-0.396841	-0.34336
clust2	ENSG00000198576	1.61638	2.45639	2.35479	-0.4906	-0.405609	-0.4906	-0.415384	-0.440283	-0.437165	-0.390282	-0.4906	-0.46601	-0.418442	-0.4906	-0.4906	-0.281554	-0.362983	-0.35685
clust2	ENSG00000237289	1.54483	2.4414	2.4258	-0.461203	-0.461203	-0.461203	-0.393328	-0.438317	-0.436883	-0.370593	-0.438678	-0.461203	-0.461203	-0.461203	-0.461203	-0.416561	-0.368073	-0.321173
clust2	ENSG00000188770	1.73846	2.20143	2.47535	-0.473436	-0.565496	-0.211647	-0.479467	-0.565496	-0.565496	-0.237842	-0.400477	-0.403149	-0.565496	-0.416826	-0.565496	-0.400523	-0.152917	-0.41148
clust2	ENSG00000135525	1.92566	2.22019	2.30258	-0.45604	-0.504562	-0.587018	-0.473676	-0.499594	-0.458024	-0.312297	-0.406119	-0.331295	-0.571681	-0.599583	-0.58812	-0.1373	-0.19204	-0.331093
clust2	ENSG00000134207	1.97156	2.23147	2.26513	-0.492424	-0.479243	-0.504384	-0.493219	-0.460778	-0.504384	-0.460059	-0.482674	-0.493649	-0.504384	-0.504384	-0.504384	-0.17472	-0.215414	-0.194065
clust2	ENSG00000178445	1.80673	2.27475	2.34294	-0.522566	-0.522183	-0.509066	-0.435568	-0.481442	-0.490903	-0.451629	-0.505359	-0.505754	-0.523261	-0.513069	-0.516418	-0.147086	-0.0528165	-0.247304
clust2	ENSG00000164398	1.94204	2.12356	2.36448	-0.348466	-0.336939	-0.546366	-0.546366	-0.180599	-0.546366	-0.546366	-0.365752	-0.368782	-0.546366	-0.546366	-0.546366	-0.00841545	-0.4502	-0.546366
clust2	ENSG00000139835	1.84481	2.27766	2.31355	-0.451769	-0.261906	-0.344296	-0.485106	-0.280268	-0.327596	-0.466748	-0.334746	-0.674056	-0.72212	-0.519865	-0.522965	-0.334909	-0.231203	-0.478463
clust2	ENSG00000143375	1.89558	2.26423	2.2659	-0.370075	-0.427626	-0.405849	-0.32621	-0.251842	-0.246636	-0.454999	-0.497385	-0.419558	-0.711826	-0.703898	-0.711826	-0.17723	-0.365422	-0.355332
clust2	ENSG00000095203	1.96812	2.27273	2.21397	-0.180506	-0.317048	-0.318365	-0.387685	-0.316725	-0.472549	-0.471766	-0.513146	-0.542388	-0.645085	-0.629923	-0.632186	-0.361189	-0.27811	-0.388156
clust2	ENSG00000164142	2.10628	2.13641	2.24024	-0.377473	-0.347617	-0.325936	-0.410169	-0.479581	-0.408287	-0.358166	-0.429931	-0.510358	-0.595833	-0.679062	-0.578983	-0.324959	-0.335345	-0.321225
clust2	ENSG00000167195	1.94284	1.76753	2.62275	0.0475992	-0.580748	-0.44904	0.00666131	-0.580748	-0.580748	-0.459522	-0.580748	-0.351192	-0.46575	-0.475402	-0.455984	-0.463447	-0.580748	-0.363297
clust2	ENSG00000198797	1.56589	2.12082	2.63897	-0.559067	-0.559067	-0.559067	-0.0905652	-0.32323	-0.559067	-0.438378	-0.559067	-0.330799	-0.109676	-0.248018	-0.559067	-0.559067	-0.312485	-0.559067
clust2	ENSG00000103710	1.62912	2.22867	2.55238	-0.474021	-0.54506	-0.3694	-0.384298	-0.297003	-0.375718	-0.382723	-0.54506	-0.54506	-0.361637	-0.430442	-0.378214	-0.512244	-0.54506	-0.264226
clust2	ENSG00000188730	1.81167	2.11723	2.53012	-0.466885	-0.428574	-0.466885	-0.2341	-0.433316	-0.395711	-0.466885	-0.400986	-0.434404	-0.466885	-0.466885	-0.466885	-0.466885	-0.396848	-0.466885
clust2	ENSG00000166573	1.73777	2.1524	2.56277	-0.434301	-0.434301	-0.434301	-0.372727	-0.434301	-0.434301	-0.434301	-0.434301	-0.434301	-0.434301	-0.434301	-0.434301	-0.434301	-0.434301	-0.434301
clust2	ENSG00000182261	1.67562	2.15032	2.60861	-0.432974	-0.432974	-0.432974	-0.432974	-0.432974	-0.432974	-0.432974	-0.432974	-0.432974	-0.432974	-0.432974	-0.432974	-0.372909	-0.432974	-0.432974
[truncated: 8,896 more rows]
