# Supplementary material for: A hiPSC-derived lineage-specific vascular smooth muscle cell-on-a-chip identifies aortic heterogeneity across segments
Source: Royal Society of Chemistry journal article supplement (doi:10.1039/d2lc01158a), 2023-01-01
Supplement: d2lc01158a4.xlsx [file d2lc01158a4.xlsx]

## Sheet: S_LMvsN_LM
gene	baseMean	logFC	lfcSE	stat	pvalue	padj
SULT1E1	8.11544	6.59299	1.34855	4.88896	1.01e-06	5.53e-06
MYH7	7.94865	6.56254	1.35132	4.85639	1.2e-06	6.48e-06
FGG	7.46676	6.47028	1.38163	4.68307	2.83e-06	1.44e-05
ERMN	31.5543	6.11115	0.902956	6.76794	1.31e-11	1.22e-10
DAPP1	184.206	6.05186	0.370541	16.3325	5.8e-60	4.34e-58
MALL	5.41651	6.00934	1.4259	4.21441	2.5e-05	0.000110114
MYH6	5.08866	5.91751	1.45037	4.07999	4.5e-05	0.000189931
SLC17A8	35.0082	5.8253	0.788887	7.38419	1.53e-13	1.71e-12
C1QL2	4.32988	5.68656	1.4951	3.80347	0.000142683	0.000546789
NELL1	159.223	5.58921	0.892383	6.26324	3.77e-10	3.07e-09
FGB	3.60121	5.42119	1.60025	3.38772	0.000704756	0.00233083
FGL2	743.347	5.29278	0.156264	33.8707	1.8e-251	2.55e-248
ASZ1	3.24695	5.27125	1.609	3.27609	0.00105254	0.00333991
GC	3.08349	5.19545	1.63384	3.1799	0.00147326	0.00451934
KRT4	3.05227	5.18342	1.59766	3.24438	0.00117706	0.00369142
CELA2A	6.083	5.18334	1.42152	3.64634	0.000266002	0.000969737
C2CD4D	3.02215	5.17152	1.63685	3.15944	0.00158075	0.00480737
TNFAIP8L2	2.88659	5.1016	1.62677	3.13603	0.0017125	0.00517272
WNT2	1755.43	5.06263	0.109991	46.0278	0	0
MKX	29.2579	4.96962	0.686992	7.23388	4.69e-13	5.02e-12
HAO2	2.54267	4.9168	1.72377	2.85235	0.0043397	0.011958
GKN1	42.4065	4.91482	0.56097	8.76129	1.93e-18	3.1e-17
HTRA4	2.52641	4.90918	1.67597	2.92917	0.00339873	0.00961347
BHLHA15	5.00803	4.89079	1.44359	3.38794	0.000704209	0.00232995
OAS3	17.8226	4.81456	0.846799	5.6856	1.3e-08	9.05e-08
MYL2	2.34337	4.80101	1.70032	2.8236	0.00474879	0.01295
C4orf17	2.32009	4.78657	3.63172	1.31799	0.187506	0.294823
A2M	601.289	4.78476	0.15411	31.0476	1.23e-211	1.12e-208
MYMK	2.19856	4.70487	1.78221	2.63991	0.00829284	0.0211622
GYPA	2.13483	4.66992	1.79011	2.60873	0.00908777	0.0229724
CERKL	2.00628	4.57377	1.78989	2.55534	0.0106084	0.0263501
PTPRQ	14.9074	4.56574	0.872848	5.23085	1.69e-07	1.02e-06
NUPR1	1.97728	4.55674	1.80214	2.52851	0.0114547	0.0282494
XKRX	1.97728	4.55674	1.80214	2.52851	0.0114547	0.0282494
SFTPA2	1.94144	4.53436	1.90092	2.38535	0.0170627	0.0398701
NXPE2	3.9232	4.52028	1.53642	2.94208	0.00326011	0.00926006
ITIH3	6.94088	4.46987	1.24394	3.59333	0.000326483	0.00116693
TMEM71	3.78652	4.46355	1.53029	2.9168	0.00353643	0.00995775
RTL1	14.0913	4.44871	0.898175	4.95305	7.31e-07	4.07e-06
C3	315.373	4.43233	0.195668	22.6523	1.32e-113	3.5e-111
TRIM29	13.2643	4.4127	0.904214	4.88015	1.06e-06	5.77e-06
PZP	9.8458	4.36495	1.01353	4.30669	1.66e-05	7.49e-05
IL34	6.52895	4.35415	1.27177	3.42368	0.000617798	0.00207406
AGTR2	1.66347	4.30112	2.05516	2.09284	0.0363632	0.0762208
ATP6V0A4	9.06489	4.2886	1.06209	4.03787	5.39e-05	0.000223768
ABCB5	1.62393	4.27171	2.10558	2.02875	0.0424836	0.0869206
C1QTNF9B	1.62172	4.27003	1.89435	2.25409	0.0241906	0.0541065
HSD3B2	27.6749	4.262	0.601241	7.08867	1.35e-12	1.38e-11
TINAGL1	1932.56	4.25773	0.197261	21.5842	2.53e-103	5.32e-101
GFRA1	1821.54	4.24717	0.0925225	45.9042	0	0
SLITRK1	18.1068	4.22886	0.729749	5.79496	6.83e-09	4.87e-08
PLN	178.843	4.22234	0.60712	6.95471	3.53e-12	3.49e-11
LGSN	5.94079	4.16746	1.2689	3.2843	0.00102236	0.0032536
EREG	3.03314	4.14489	1.59487	2.5989	0.0093524	0.0235839
ACSS1	11.1429	4.14216	0.955953	4.33302	1.47e-05	6.7e-05
GSDMA	3.02391	4.14118	1.5794	2.622	0.00874166	0.0221731
NIBAN1	4033.3	4.10205	0.169241	24.2379	8.88e-130	2.94e-127
C4B	2.8525	4.05192	1.60264	2.52828	0.0114622	0.028259
CHAT	39.1533	4.00102	0.498632	8.02399	1.02e-15	1.37e-14
SAMD9L	25.8213	3.99828	0.588863	6.78983	1.12e-11	1.06e-10
FGF5	5.19094	3.9808	1.29836	3.06602	0.00216927	0.00640702
GPR1	102.127	3.97728	0.302491	13.1484	1.74e-39	7.16e-38
RUFY4	2.67056	3.95221	1.65549	2.38733	0.0169712	0.039692
GCSAML	2.6763	3.94587	1.62339	2.43064	0.0150723	0.0359011
NCKAP5	91.5171	3.84884	0.32647	11.7893	4.43e-32	1.4e-30
COL15A1	2856.7	3.84881	0.204709	18.8014	7.36e-79	9.09e-77
TMPRSS11A	2.47366	3.83759	1.66051	2.3111	0.0208276	0.0473947
GPHA2	2.47256	3.83699	1.66058	2.31063	0.0208531	0.0474422
SLITRK2	15.9574	3.8304	0.736301	5.20222	1.97e-07	1.18e-06
ZAR1L	2.45389	3.82713	1.80961	2.1149	0.0344387	0.0727942
KCNIP1	4.60484	3.82629	1.33345	2.86947	0.00411154	0.0113816
ARMC4	22.6827	3.79189	0.604271	6.27515	3.49e-10	2.86e-09
NFIX	132.839	3.73763	0.690948	5.40943	6.32e-08	4.06e-07
LPO	8.99832	3.72109	0.982805	3.7862	0.00015297	0.000583053
ADRA1A	2.27215	3.71055	1.71376	2.16515	0.030376	0.0655775
RASSF6	29.6735	3.70325	0.520536	7.11431	1.12e-12	1.16e-11
C10orf67	4.05317	3.68951	1.39498	2.64485	0.00817266	0.0209137
LAMA3	868.313	3.67562	0.293419	12.5268	5.32e-36	1.91e-34
OXTR	152.449	3.65878	0.254576	14.372	7.75e-47	4.02e-45
CNTN6	121.367	3.64934	0.256372	14.2345	5.59e-46	2.78e-44
DAW1	16.1902	3.62238	0.682425	5.30811	1.11e-07	6.9e-07
PKD1L1	18.134	3.62124	0.646384	5.6023	2.12e-08	1.43e-07
DCN	8071.38	3.61938	0.209752	17.2555	1.02e-66	9.11e-65
SV2B	20.4799	3.61641	0.630247	5.73809	9.58e-09	6.74e-08
ADGRG4	2.17755	3.61108	1.753	2.05994	0.0394038	0.0816166
NPHS1	2.15155	3.60703	1.72666	2.08902	0.0367058	0.0768459
LRFN2	2.12383	3.60243	1.73842	2.07225	0.0382423	0.0795811
NOS1	6.06709	3.59803	1.11585	3.22448	0.00126202	0.00393882
CX3CR1	9.90692	3.58876	0.882795	4.06523	4.8e-05	0.000201547
SYNPO2	1015.28	3.5624	0.108994	32.6843	2.61e-234	3.39e-231
CHRDL2	26.7197	3.55375	0.537424	6.61255	3.78e-11	3.38e-10
SLC30A2	3.6928	3.55094	1.44821	2.45194	0.0142087	0.0341544
PRC1	3.65586	3.53994	1.46459	2.41701	0.0156484	0.0370715
EPHA3	1276.21	3.53872	0.0958874	36.9049	3.85e-298	1.2e-294
ST6GALNAC5	394.044	3.49748	0.146662	23.8473	1.08e-125	3.37e-123
SYNPO	1307.54	3.49009	0.0960981	36.318	8.41e-289	2.18e-285
CT45A1	1.98125	3.4773	1.88122	1.84842	0.0645411	0.124079
WNT7B	1.96056	3.47588	1.76944	1.9644	0.0494839	0.0992354
TMEM163	1.98015	3.47586	1.7656	1.96865	0.0489929	0.0985171
ST8SIA5	1.96851	3.46877	1.79822	1.929	0.0537314	0.106141
CR1	1.98397	3.46673	1.90861	1.81637	0.069314	0.13131
CGB8	1.93396	3.45898	1.89044	1.82972	0.0672917	0.128369
CAPN8	1.95114	3.45776	1.76931	1.9543	0.0506657	0.101137
TMEM176A	40.4384	3.45763	0.434926	7.94994	1.87e-15	2.45e-14
GBP1	104.761	3.44016	0.268565	12.8094	1.45e-37	5.56e-36
MYO3B	31.734	3.43795	0.504654	6.81248	9.59e-12	9.13e-11
C4orf50	10.8797	3.42285	0.823831	4.1548	3.26e-05	0.000140808
SELPLG	83.0456	3.40296	0.302903	11.2345	2.76e-29	7.66e-28
NPPC	8.42301	3.39407	0.926939	3.66158	0.00025066	0.000918106
C4orf54	10.3233	3.37583	0.83525	4.04171	5.31e-05	0.000220436
FAM71F1	5.12957	3.35277	1.19709	2.80077	0.00509816	0.0137845
CLEC3A	71.1468	3.3511	0.319361	10.4932	9.29e-26	2.19e-24
DMRT2	10.1375	3.33658	0.824112	4.04869	5.15e-05	0.00021453
NCAM2	193.626	3.32502	0.193613	17.1735	4.19e-66	3.69e-64
DNASE1L3	1.76938	3.3181	1.84066	1.80267	0.0714404	0.134715
CTRB2	1.76828	3.31715	1.81174	1.83092	0.0671132	0.128106
KCNK15	6.33169	3.31502	1.07135	3.09425	0.00197308	0.00587661
ACTG2	6752.5	3.30692	0.155934	21.2072	8.2e-100	1.6e-97
GDF7	224.907	3.30222	0.20745	15.9181	4.74e-57	3.37e-55
GALNT15	1.76588	3.30139	1.93977	1.70195	0.0887648	0.161536
SLC1A2	8.38308	3.28965	0.947595	3.47158	0.000517413	0.00176947
CYP8B1	1.73688	3.27988	1.96364	1.67031	0.0948586	0.170513
ADAMTSL1	677.423	3.27946	0.133241	24.613	9.16e-134	3.4e-131
NPY4R	3.39129	3.2662	1.47379	2.21619	0.0266786	0.0587435
SAMD9	13.0341	3.25916	0.729399	4.46828	7.89e-06	3.74e-05
CCDC80	37959	3.25242	0.0780618	41.6647	0	0
RBP7	7.82837	3.23147	0.937901	3.44543	0.000570151	0.00193243
WNT2B	744.591	3.21919	0.11333	28.4054	1.74e-177	1.18e-174
IFIH1	25.7713	3.21751	0.539484	5.96405	2.46e-09	1.85e-08
THBS2	179.299	3.21115	0.209807	15.3053	7.05e-53	4.36e-51
TCTE1	4.60038	3.20696	1.24667	2.57243	0.0100986	0.0252396
KCNE1B	4.32827	3.17685	1.2763	2.48911	0.0128065	0.0311492
NANOGP8	1.62841	3.14978	1.87756	1.67759	0.0934271	0.168524
SMPX	28.7425	3.14211	1.02258	3.07272	0.00212121	0.00627936
TBX1	1.61456	3.13887	1.88032	1.66933	0.0950518	0.170821
HSD17B2	122.92	3.13383	0.252562	12.4082	2.36e-35	8.28e-34
AQP1	2172.89	3.11414	0.0900694	34.5749	6.02e-262	1.04e-258
MINAR2	8.62932	3.10974	0.88164	3.52723	0.000419938	0.00146705
GABRA1	5.8616	3.10696	1.0536	2.94891	0.00318895	0.00907948
SLC16A6	35.1629	3.08749	0.444628	6.94398	3.81e-12	3.75e-11
DHRS9	77.1062	3.08661	0.322339	9.57568	1.01e-21	1.93e-20
CACNA1D	134.418	3.0746	0.241376	12.7378	3.64e-37	1.37e-35
FAP	277.184	3.07206	0.163117	18.8335	4.02e-79	5e-77
PLAC1	121.736	3.06242	0.247505	12.3732	3.65e-35	1.27e-33
MYO18B	4.02481	3.05693	1.2822	2.38412	0.0171199	0.0399857
FRY	1338.25	3.03714	0.0992351	30.6055	1.03e-205	8.48e-203
CPNE6	2.79497	3.03147	1.55649	1.94763	0.0514593	0.102434
CHRNA4	2.85791	3.02538	1.48076	2.04312	0.0410402	0.0844445
SLFN11	29.0465	3.02448	1.23727	2.44448	0.0145063	0.0347464
SH2D4A	416.076	3.02387	0.133216	22.699	4.58e-114	1.23e-111
CP	4.04311	3.00022	1.23527	2.4288	0.0151487	0.0360303
CHRNA3	58.4771	2.99797	0.331766	9.0364	1.62e-19	2.76e-18
ECRG4	14.954	2.99371	0.664649	4.5042	6.66e-06	3.21e-05
MESP2	3.85562	2.99126	1.31923	2.26743	0.0233638	0.0524381
ANKRD29	110.125	2.99002	0.255288	11.7123	1.1e-31	3.4e-30
HIC1	84.0562	2.98437	0.274896	10.8564	1.86e-27	4.73e-26
CA12	56.5953	2.98149	0.341406	8.73298	2.48e-18	3.93e-17
PLEKHA7	1007.06	2.98105	0.270409	11.0242	2.92e-28	7.72e-27
ARSH	2.71218	2.9779	1.58433	1.8796	0.060163	0.116757
RARRES1	132.976	2.95787	0.242614	12.1917	3.44e-34	1.18e-32
MEI1	3.84048	2.94904	1.25458	2.35062	0.0187421	0.0432814
COL8A1	244.53	2.94628	0.169872	17.3441	2.18e-67	1.98e-65
TMEFF2	31.2336	2.9382	0.444528	6.6097	3.85e-11	3.45e-10
STX11	44.5344	2.93325	0.382111	7.67643	1.64e-14	1.96e-13
SGCD	16.1615	2.92788	0.660957	4.42975	9.43e-06	4.42e-05
HKDC1	15.48	2.92487	0.626584	4.66796	3.04e-06	1.55e-05
ROS1	2.6854	2.92048	1.51126	1.93248	0.0532999	0.105476
ELFN2	45.7419	2.91091	0.406404	7.1626	7.92e-13	8.28e-12
FRMPD1	38.1506	2.90911	0.416505	6.98458	2.86e-12	2.85e-11
LRRC55	133.902	2.89532	0.224818	12.8785	5.95e-38	2.29e-36
COL5A3	80.0868	2.8927	0.284482	10.1683	2.75e-24	5.95e-23
ANXA8	64.6571	2.88235	0.307411	9.37622	6.84e-21	1.25e-19
BDKRB2	63.5702	2.88172	0.309026	9.32517	1.11e-20	2.01e-19
ADH1A	2.69163	2.88079	1.5437	1.86615	0.0620203	0.119958
TMEM229B	27.3842	2.87021	0.487638	5.88595	3.96e-09	2.9e-08
SPTLC3	495.176	2.86827	0.135505	21.1673	1.91e-99	3.68e-97
CEMIP	562.102	2.84903	0.360488	7.90326	2.72e-15	3.52e-14
KRT80	28.1098	2.84167	0.495731	5.73229	9.91e-09	6.97e-08
CCDC70	3.86903	2.83799	1.32488	2.14208	0.0321869	0.0688003
AKAP6	1418.23	2.83598	0.212776	13.3285	1.58e-40	6.8e-39
MYO1G	2.47002	2.83264	1.53161	1.84945	0.0643923	0.123823
GSAP	18.3637	2.83162	0.599796	4.72097	2.35e-06	1.22e-05
SLIT3	1706.29	2.82868	0.0942307	30.0186	5.61e-198	3.97e-195
SEMA3E	332.395	2.82209	0.154852	18.2245	3.3e-74	3.62e-72
MFSD6L	2.54411	2.82111	1.59546	1.76822	0.0770249	0.143508
ANXA8L1	51.1303	2.81489	0.365803	7.6951	1.41e-14	1.71e-13
MTNR1A	2.42364	2.80631	1.66108	1.68945	0.0911331	0.165036
SLC30A10	3.56412	2.7957	1.32599	2.10838	0.0349979	0.073736
GALNT12	139.845	2.78905	0.218531	12.7627	2.65e-37	1e-35
EDN3	9.56205	2.78763	0.821127	3.39488	0.000686581	0.00228089
NIM1K	3.54146	2.78608	1.42707	1.95231	0.0509013	0.101503
SOD3	452.508	2.78501	0.124806	22.3147	2.66e-110	6.79e-108
CARNS1	104.746	2.77652	0.25796	10.7634	5.13e-27	1.27e-25
PCP4	1055.69	2.77647	0.238252	11.6535	2.2e-31	6.7e-30
GNAT2	45.633	2.77414	0.369249	7.51294	5.78e-14	6.68e-13
C1QTNF7	31.7697	2.76897	0.458393	6.0406	1.54e-09	1.18e-08
CFH	56.1905	2.76293	0.336224	8.21752	2.08e-16	2.92e-15
ERICH6	2.30513	2.75863	1.61561	1.70749	0.0877306	0.160028
BHLHE41	112.228	2.74726	0.253961	10.8177	2.84e-27	7.12e-26
SGCG	48.236	2.72941	0.353728	7.71612	1.2e-14	1.46e-13
ACTA2	10248.1	2.72645	0.200833	13.5757	5.58e-42	2.53e-40
ASB2	2.32583	2.7199	1.64401	1.65443	0.09804	0.175301
NLRC5	107.098	2.71542	0.253337	10.7186	8.32e-27	2.04e-25
VTN	2748.45	2.70014	0.0770339	35.0513	3.73e-269	8.29e-266
OR2L13	2.27644	2.69761	1.75297	1.53888	0.123834	0.211841
AVIL	197.268	2.6975	0.176023	15.3247	5.23e-53	3.26e-51
DLK1	967.763	2.67921	0.100104	26.7641	8.45e-158	4.54e-155
AC213203.2	4.82469	2.67884	1.23551	2.16821	0.0301424	0.0651997
ABCC3	8.19415	2.66706	0.874879	3.04849	0.00229992	0.00675191
LUM	40458.5	2.66658	0.197901	13.4743	2.21e-41	9.83e-40
CDH6	369.168	2.65948	0.140978	18.8645	2.23e-79	2.83e-77
SLC34A2	2.08513	2.65595	1.69678	1.56529	0.117514	0.203126
CCDC144A	4.38879	2.65497	1.14564	2.31745	0.0204794	0.0467046
UPK3B	21.9293	2.65229	0.506762	5.2338	1.66e-07	1.01e-06
TMEM176B	41.4357	2.64871	0.392896	6.74151	1.57e-11	1.46e-10
MLIP	88.0127	2.6483	0.258687	10.2375	1.35e-24	2.97e-23
MT1E	70.1387	2.64567	0.336404	7.86456	3.7e-15	4.74e-14
PKHD1	5.62312	2.63711	1.02776	2.56589	0.0102911	0.025648
SLC16A12	19.7001	2.62997	0.53494	4.91638	8.82e-07	4.85e-06
AC068946.1	2.32443	2.62721	1.63424	1.60761	0.107921	0.189553
NEGR1	118.004	2.62631	0.273004	9.62003	6.58e-22	1.27e-20
MYOT	3.33392	2.6258	1.32276	1.98508	0.0471351	0.0952611
ALKAL2	8.87277	2.62152	0.828137	3.16557	0.0015478	0.00472194
GYPE	7.04229	2.61264	0.989184	2.64121	0.00826112	0.0210985
OR51E2	93.7883	2.60985	0.29691	8.79004	1.5e-18	2.42e-17
LTBP1	18429.1	2.60795	0.0754385	34.5706	7e-262	1.09e-258
C11orf87	20.5417	2.60174	0.543026	4.79119	1.66e-06	8.78e-06
PI16	3.16219	2.60118	1.35088	1.92554	0.0541613	0.1068
EPAS1	2708.58	2.59948	0.0799699	32.5057	8.85e-232	1.06e-228
PTPRO	2.06869	2.59226	1.7356	1.49358	0.135285	0.226967
CPT1A	316.949	2.58631	0.144927	17.8456	3.13e-71	3.12e-69
ITPR1	1907.78	2.57889	0.0847068	30.4449	1.4e-203	1.04e-200
ALB	22.9053	2.57685	0.575561	4.47711	7.57e-06	3.6e-05
C1QTNF1	73.1104	2.57655	0.27962	9.21446	3.13e-20	5.54e-19
INMT	35.0354	2.57471	0.414353	6.21381	5.17e-10	4.15e-09
VSNL1	59.2085	2.56974	0.311554	8.24815	1.61e-16	2.28e-15
TMEM26	4.30122	2.56092	1.25088	2.0473	0.0406287	0.0837674
SVEP1	707.732	2.55936	0.106997	23.92	1.9e-126	6.03e-124
CATSPER1	2.08656	2.55485	1.63368	1.56386	0.117851	0.203524
PSORS1C2	7.10619	2.55037	0.886546	2.87675	0.00401799	0.0111541
OR10G4	2.16065	2.54844	1.61215	1.58077	0.11393	0.198185
SLC5A9	9.5187	2.54676	0.793791	3.20835	0.00133499	0.00413919
STC2	1636.25	2.54597	0.0935587	27.2125	4.62e-163	2.88e-160
IPCEF1	4.02337	2.54118	1.18878	2.13764	0.0325463	0.069435
APOL6	43.0861	2.5385	0.367606	6.9055	5e-12	4.87e-11
TIMM23B-AGAP6	44.0929	2.53706	0.38052	6.66734	2.6e-11	2.36e-10
APBA1	48.2778	2.5253	0.346326	7.2917	3.06e-13	3.31e-12
PRR22	11.0214	2.51905	0.745718	3.37801	0.000730111	0.00240651
NALCN	27.7021	2.51895	0.462035	5.45185	4.98e-08	3.24e-07
SLC7A4	67.1003	2.51806	0.666064	3.78051	0.000156506	0.000595512
KCNA5	2.9404	2.51559	1.36482	1.84316	0.065306	0.125256
CLDN1	158.684	2.50525	0.199134	12.5807	2.7e-36	9.76e-35
FAM71D	2.16337	2.50216	1.63448	1.53086	0.125803	0.214314
ETNPPL	1.89395	2.49747	1.70468	1.46507	0.142902	0.237266
FCGBP	8.36971	2.49667	0.834412	2.99212	0.00277043	0.00800269
CFAP47	25.1668	2.49436	0.466199	5.35043	8.77e-08	5.54e-07
CLDN16	3.75428	2.4937	1.27422	1.95704	0.0503422	0.100614
STUM	2.95778	2.48803	1.40672	1.76867	0.0769483	0.143402
MCMDC2	5.75978	2.48614	1.03771	2.3958	0.0165843	0.0389668
KL	1.95068	2.48424	1.77972	1.39586	0.162757	0.263518
ASS1	872.048	2.4804	0.0980752	25.2908	4.03e-141	1.7e-138
OTUD7A	4.88869	2.47922	1.06954	2.31803	0.0204477	0.0466392
PTGIS	548.146	2.47739	0.112017	22.1161	2.21e-108	5.3e-106
IL15RA	6.29239	2.47669	0.986157	2.51146	0.0120233	0.0294977
NXPE1	8.15895	2.46869	0.831035	2.97062	0.00297195	0.00852868
OLR1	79.647	2.45548	0.276259	8.88832	6.2e-19	1.02e-17
NOS2	2.10314	2.44692	1.7994	1.35985	0.173877	0.277598
PCDHB1	2.10314	2.44692	1.7994	1.35985	0.173877	0.277598
RGS7BP	2.10314	2.44692	1.7994	1.35985	0.173877	0.277598
SMKR1	4.04952	2.44529	1.19463	2.04691	0.0406671	0.0838319
SECTM1	3.00146	2.44364	1.33995	1.82368	0.0681999	0.129641
FCGR1A	2.7204	2.43856	1.49647	1.62954	0.103198	0.182907
SYPL2	1329.31	2.43777	0.284174	8.57846	9.62e-18	1.48e-16
TMEM151A	63.6967	2.43516	0.293758	8.28968	1.14e-16	1.63e-15
MS4A7	3.07204	2.4339	1.39329	1.74688	0.0806586	0.14929
ADH4	1.93141	2.41769	1.75136	1.38046	0.167445	0.269483
EGFL6	7235.84	2.41515	0.169256	14.2692	3.4e-46	1.71e-44
PLG	3.00941	2.40799	1.36994	1.75773	0.0787928	0.146295
AC008676.3	2.75274	2.4074	1.40377	1.71495	0.0863544	0.15798
C17orf78	1.92039	2.40318	1.69604	1.41694	0.1565	0.255005
SH3RF2	528.881	2.40034	0.11463	20.9399	2.32e-97	4.2e-95
AKAP5	627.896	2.39987	0.114431	20.9723	1.17e-97	2.15e-95
CA4	4.72462	2.39967	1.04396	2.29863	0.0215261	0.0487989
STING1	51.1889	2.39473	0.340099	7.04129	1.9e-12	1.93e-11
NRXN3	315.104	2.3939	0.140759	17.0071	7.28e-65	6.1e-63
DDR2	1071.38	2.39165	0.117419	20.3684	3.19e-92	5.12e-90
STMND1	1.89428	2.39125	1.76508	1.35476	0.175496	0.279722
AL139353.1	3.04926	2.38901	1.39886	1.70783	0.0876685	0.159933
APOB	25.044	2.38817	1.22391	1.95126	0.0510257	0.101699
SYTL2	687.52	2.38722	0.129765	18.3965	1.4e-75	1.59e-73
KCNMB1	7.46986	2.38662	0.907225	2.63068	0.00852136	0.0216778
SCRG1	25.5891	2.3842	0.454892	5.24124	1.6e-07	9.69e-07
TDRD12	4.48342	2.38389	1.10652	2.15439	0.0312092	0.0670232
KCNJ3	12.0011	2.38252	0.679486	3.50636	0.000454281	0.00157634
NNMT	1244.3	2.3823	0.114438	20.8175	3e-96	5.32e-94
PLGLB2	4.64642	2.38155	1.16111	2.05111	0.0402563	0.0831171
SH2D4B	1.95322	2.37697	1.67729	1.41715	0.15644	0.255005
TFR2	8.70104	2.37676	0.798294	2.9773	0.002908	0.00835901
IRAG2	17.1674	2.37006	0.596118	3.97583	7.01e-05	0.000285281
CDH15	22.4395	2.36595	0.531383	4.45243	8.49e-06	4.01e-05
SHISAL1	113.166	2.36535	0.232999	10.1518	3.25e-24	7e-23
OMG	3.61504	2.36303	1.24117	1.90388	0.0569259	0.111335
C1R	531.013	2.3579	0.130031	18.1334	1.74e-73	1.89e-71
ELOVL2	403.669	2.35742	0.131761	17.8917	1.37e-71	1.38e-69
KLKB1	7.29882	2.35146	0.878851	2.67561	0.00745935	0.0193143
NXF3	1.91738	2.34978	1.71459	1.37046	0.170543	0.273378
NFIB	77.6456	2.34208	0.293463	7.98082	1.45e-15	1.93e-14
MAMLD1	102.44	2.335	0.264283	8.83523	9.99e-19	1.63e-17
TMEM236	32.9309	2.3342	0.40361	5.78331	7.32e-09	5.19e-08
AOC1	2.56064	2.33208	1.49001	1.56514	0.11755	0.203143
OPRK1	2.54327	2.32733	1.54074	1.51053	0.130909	0.221053
IRAG1	139.284	2.32553	0.207415	11.2119	3.56e-29	9.86e-28
PSMB8	56.3476	2.32114	0.34036	6.81964	9.13e-12	8.69e-11
MET	102.43	2.31915	0.262276	8.84244	9.37e-19	1.53e-17
CDHR4	1.69354	2.31908	1.79403	1.29266	0.196128	0.305615
SMOC2	497.653	2.31505	0.113101	20.4689	4.08e-93	6.61e-91
MEDAG	71.9823	2.31435	0.275172	8.41058	4.08e-17	6.03e-16
AQP3	121.428	2.3127	0.218221	10.598	3.04e-26	7.3e-25
SPI1	1.95593	2.31099	1.87052	1.23548	0.216651	0.330116
TAC1	2.60683	2.30981	1.42053	1.62601	0.103947	0.183958
SNTG1	1.93636	2.30599	1.76551	1.30613	0.191508	0.299724
GNG13	5.25241	2.30395	1.02345	2.25116	0.0243755	0.0544499
NXPH4	42.7579	2.30214	0.409763	5.61823	1.93e-08	1.31e-07
C1QL1	4.24477	2.30156	1.17642	1.95641	0.050417	0.100731
ITLN1	11.8145	2.30115	0.676651	3.40079	0.000671911	0.00223597
RP1	5.40659	2.2984	0.974777	2.35787	0.0183803	0.0425594
SEZ6	10.6705	2.29157	0.691432	3.31424	0.000918917	0.00295992
CSRP3	3.46562	2.28729	1.24789	1.83293	0.0668124	0.127704
GCNT1	486.851	2.28649	0.117621	19.4396	3.57e-84	5.15e-82
FOXD4L1	1.71424	2.27491	1.83003	1.2431	0.213831	0.327196
TMEM40	14.5535	2.26972	0.64025	3.54505	0.000392539	0.00138187
PDCD1LG2	23.5545	2.26167	0.466879	4.84423	1.27e-06	6.86e-06
ERVW-1	6.04457	2.25779	0.991401	2.27737	0.0227639	0.0511948
MCTP2	88.6114	2.25627	0.262905	8.58211	9.32e-18	1.43e-16
CLDN11	353.499	2.25249	0.307488	7.32545	2.38e-13	2.62e-12
IGFBP1	5.01917	2.25056	1.06584	2.11153	0.0347264	0.0732136
ADRB3	23.3068	2.24808	0.491369	4.57513	4.76e-06	2.34e-05
TRPC4	177.015	2.24641	0.192138	11.6916	1.41e-31	4.32e-30
CTSW	3.50308	2.24525	1.18969	1.88726	0.0591256	0.115088
MAN1C1	324.967	2.23966	0.144864	15.4605	6.41e-54	4.13e-52
KCNRG	2.41935	2.23511	1.56194	1.43099	0.152434	0.250002
SH3RF3	95.3129	2.2346	0.250375	8.92502	4.46e-19	7.44e-18
ZFP92	27.9142	2.23362	0.458891	4.86742	1.13e-06	6.15e-06
SAXO1	7.62725	2.22939	0.824248	2.70476	0.00683536	0.0178734
PADI2	85.6944	2.22428	0.259714	8.56434	1.09e-17	1.66e-16
A4GALT	8.58028	2.22307	0.7822	2.84208	0.00448206	0.0123089
GDF10	80.515	2.21881	0.261105	8.49777	1.93e-17	2.92e-16
RASD2	4.62655	2.21548	1.16744	1.89773	0.0577318	0.112671
B3GALT2	4.52268	2.21454	1.19419	1.85443	0.0636783	0.122723
CD38	19.3649	2.20865	0.543793	4.06156	4.87e-05	0.000204517
LMO4	3511.72	2.20545	0.0691179	31.9086	2.03e-223	2.26e-220
VGLL3	359.307	2.20498	0.145672	15.1366	9.3e-52	5.63e-50
SYT16	41.3284	2.20413	0.388018	5.68048	1.34e-08	9.3e-08
GOLGA7B	6.06902	2.20199	1.07002	2.0579	0.0395997	0.0819242
A2ML1	7.50049	2.19893	0.8289	2.65282	0.00798216	0.020497
OLFML1	23.2024	2.19226	0.486359	4.50749	6.56e-06	3.16e-05
RAB38	299.986	2.18938	0.154644	14.1576	1.68e-45	8.24e-44
TBC1D10C	62.8861	2.18934	0.304492	7.19014	6.47e-13	6.82e-12
CPA4	1144.57	2.1888	0.0880948	24.8459	2.86e-136	1.14e-133
CKLF	3.50389	2.18695	1.29707	1.68608	0.0917812	0.166074
KCTD8	3.25708	2.18591	1.32142	1.65421	0.098084	0.17534
E2F2	57.9695	2.18397	0.310806	7.02677	2.11e-12	2.13e-11
PCSK2	9.21556	2.18216	0.747593	2.91892	0.00351249	0.00990108
PLEK2	42.8933	2.18157	0.364818	5.97989	2.23e-09	1.68e-08
OLFM3	23.7025	2.18128	0.471157	4.62963	3.66e-06	1.84e-05
CTSF	1.82167	2.17922	1.85121	1.17719	0.239121	0.356678
DIRAS2	137.642	2.17551	0.206219	10.5495	5.11e-26	1.21e-24
AMBP	3.30155	2.1743	1.26481	1.71908	0.0856004	0.156914
MYLK	1609.69	2.17285	0.0809199	26.8518	8.03e-159	4.47e-156
PRPH2	81.8601	2.16533	0.269669	8.02959	9.78e-16	1.31e-14
SMC1B	6.65349	2.15522	0.873355	2.46774	0.0135968	0.0328358
SYT9	9.90295	2.15438	0.713371	3.02	0.00252774	0.00735283
TTPA	6.46198	2.1534	0.966007	2.22917	0.0258023	0.0571291
C11orf88	3.32527	2.14801	1.33236	1.61219	0.106922	0.188094
SLC23A3	3.32527	2.14801	1.33236	1.61219	0.106922	0.188094
PNMA2	123.756	2.14742	0.212724	10.0948	5.82e-24	1.24e-22
VWA5B2	2.42029	2.14279	1.47873	1.44907	0.147317	0.242913
RIMKLA	23.6627	2.14081	0.509582	4.20112	2.66e-05	0.000116355
ANKRD34B	2.41326	2.13828	1.44778	1.47694	0.139693	0.233106
FNDC8	5.56939	2.11549	1.02318	2.06756	0.0386812	0.0803978
NPAS4	11.9515	2.11325	0.659148	3.20603	0.00134579	0.00416853
SLC9C1	7.93198	2.11125	0.869916	2.42696	0.0152259	0.0361806
LRRC7	88.284	2.10647	0.254496	8.277	1.26e-16	1.8e-15
TNFRSF8	65.2941	2.10595	0.321136	6.55781	5.46e-11	4.8e-10
RIBC2	6.18409	2.094	0.958174	2.18541	0.0288591	0.062755
NBPF19	2.21894	2.08831	1.58612	1.31661	0.187969	0.295372
TENM2	110.297	2.08454	0.22743	9.16567	4.92e-20	8.64e-19
FAM111B	123.595	2.08423	0.211876	9.83702	7.8e-23	1.57e-21
SAMD12	293.413	2.08372	0.151361	13.7665	4.05e-43	1.86e-41
CCDC9B	99.7952	2.08347	0.230294	9.04698	1.47e-19	2.51e-18
FILIP1	248.766	2.08302	0.14916	13.965	2.55e-44	1.22e-42
KCTD4	6.88619	2.08063	0.860824	2.41702	0.0156481	0.0370715
IL6R	656.42	2.07448	0.137108	15.1303	1.02e-51	6.15e-50
SOCS3	768	2.07377	0.0977507	21.2149	6.95e-100	1.37e-97
LXN	761.752	2.07296	0.104743	19.791	3.56e-87	5.49e-85
COL14A1	2514	2.07129	0.0650153	31.8584	1.01e-222	1.04e-219
ELF3	46.8916	2.07024	0.364375	5.68162	1.33e-08	9.24e-08
VSTM4	96.7287	2.0702	0.247944	8.34944	6.86e-17	1e-15
TNNT2	326.453	2.06924	0.143288	14.4412	2.85e-47	1.5e-45
IQGAP2	2741.73	2.06591	0.239071	8.64142	5.55e-18	8.67e-17
FZD5	207.698	2.06428	0.170678	12.0945	1.13e-33	3.76e-32
PRSS35	1521.64	2.06209	0.0763866	26.9954	1.67e-160	1e-157
SP5	6.49796	2.06201	1.04536	1.97254	0.0485484	0.0977858
IL1RL1	20.1096	2.06111	0.520994	3.95612	7.62e-05	0.000308309
LMOD1	770.714	2.06043	0.0997263	20.6609	7.79e-95	1.3e-92
GPC5	209.686	2.05641	0.167788	12.256	1.56e-34	5.38e-33
FAM163A	24.9717	2.05217	0.463259	4.42985	9.43e-06	4.42e-05
GABRB2	171.926	2.05106	0.195658	10.4829	1.04e-25	2.43e-24
SULF1	1425.65	2.04991	0.0867772	23.6227	2.25e-123	6.62e-121
GALNT5	308.102	2.0476	0.139615	14.666	1.06e-48	5.82e-47
LGALS2	5.29108	2.04724	0.993319	2.06101	0.0393019	0.0814597
CAPN9	4.1045	2.04454	1.2053	1.69629	0.0898302	0.163131
TACSTD2	48.6513	2.04375	0.326841	6.25304	4.03e-10	3.26e-09
LDHAL6A	5.34651	2.04166	0.961783	2.12278	0.0337722	0.0715798
GABRA2	488.481	2.04081	0.123421	16.5354	2.04e-61	1.57e-59
CD226	20.6272	2.03753	0.515925	3.94928	7.84e-05	0.000316265
IGFN1	2.51528	2.03707	1.49261	1.36477	0.172324	0.275712
LMCD1	5178.45	2.03649	0.0831918	24.4794	2.45e-132	8.29e-130
GLRA3	4.43179	2.03615	1.0775	1.8897	0.0587975	0.114493
SLC9A4	4.78442	2.03334	1.08715	1.87034	0.061437	0.118933
KLHL29	435.758	2.03049	0.119087	17.0504	3.47e-65	2.95e-63
KLRK1	6.10114	2.02968	0.914675	2.21902	0.0264851	0.0583921
CFAP77	4.75141	2.02437	1.02789	1.96943	0.0489032	0.0984003
TCF19	201.863	2.02164	0.208487	9.69673	3.11e-22	6.12e-21
SORBS1	851.545	2.02031	0.105047	19.2324	1.98e-82	2.78e-80
MYL7	1288.88	2.01885	0.108677	18.5766	4.97e-77	5.87e-75
LRRK1	73.1648	2.01672	0.276488	7.29405	3.01e-13	3.26e-12
CAV1	1624.81	2.01649	0.076578	26.3325	8.15e-153	3.97e-150
GRM4	14.9478	2.01402	0.591509	3.40488	0.000661928	0.00220511
DLG2	541.742	2.01044	0.116868	17.2027	2.53e-66	2.26e-64
C3orf20	14.1252	2.01027	0.62219	3.23095	0.00123379	0.00385688
RFLNB	488.714	2.00695	0.140169	14.3181	1.69e-46	8.55e-45
SLC2A5	7.15394	2.00363	0.892092	2.24599	0.0247045	0.0550741
AGAP2	2.86918	2.00166	1.36263	1.46897	0.141841	0.235933
SPDYE21	17.1685	2.00124	0.565299	3.54015	0.0003999	0.00140461
DCLK1	73.2923	2.00081	0.266078	7.51964	5.49e-14	6.36e-13
TSPAN18	1312.63	1.99994	0.0860509	23.2413	1.74e-119	4.93e-117
KRT7	78.1071	1.99698	0.26488	7.53921	4.73e-14	5.5e-13
CDCP1	19.5052	1.99676	0.525822	3.7974	0.000146223	0.000558977
CHL1	20.3999	1.9963	0.559391	3.5687	0.000358757	0.00127128
ITGB7	6.47391	1.99283	0.908321	2.19397	0.0282376	0.0616792
MOXD1	3634.51	1.99178	0.0738896	26.9561	4.84e-160	2.79e-157
ASCL3	1.65026	1.99147	1.95369	1.01934	0.308042	0.434276
DHRS3	911.381	1.98878	0.120476	16.5077	3.23e-61	2.48e-59
PPEF2	1.63751	1.98768	1.84154	1.07935	0.28043	0.403307
NT5DC4	1.64564	1.98717	1.95488	1.01652	0.309382	0.435731
PKHD1L1	6.96748	1.98525	0.880623	2.25437	0.0241731	0.0540753
KIAA2012	19.3381	1.98477	0.53509	3.70922	0.000207897	0.000771637
HP	2.26545	1.98272	1.42571	1.39069	0.16432	0.265582
GOLT1A	4.54076	1.98247	1.06271	1.86548	0.062114	0.12008
PAOX	6.09143	1.98235	0.903218	2.19476	0.0281807	0.0615721
HHIPL2	5.86088	1.97796	0.953221	2.07503	0.0379842	0.079118
CD44	1396.37	1.97785	0.0877336	22.5439	1.54e-112	4e-110
TBC1D2	169.395	1.97784	0.201486	9.81624	9.58e-23	1.92e-21
AANAT	2.96225	1.97741	1.26319	1.56542	0.117485	0.203099
ISX	2.26718	1.97717	1.59951	1.23612	0.216416	0.329977
LGALS3BP	2678.42	1.97377	0.0817978	24.1299	1.21e-128	3.94e-126
SH3GL3	276.986	1.97096	0.177861	11.0815	1.54e-28	4.12e-27
AMIGO2	4556.8	1.97007	0.0749319	26.2915	2.4e-152	1.13e-149
VWF	3.17495	1.96967	1.34092	1.4689	0.141861	0.23594
EML5	2.95012	1.96894	1.30212	1.5121	0.130508	0.220472
LRP2	355.646	1.96849	0.39482	4.98579	6.17e-07	3.47e-06
ELAVL4	2.73841	1.96426	1.55325	1.26462	0.206008	0.318007
ALPK2	747.276	1.96181	0.109285	17.9514	4.68e-72	4.83e-70
P2RX5	2.24057	1.96044	1.57509	1.24465	0.21326	0.326548
C2	5.8434	1.95943	0.913558	2.14483	0.0319663	0.0684038
BDKRB1	13.1371	1.95736	0.621495	3.14945	0.0016358	0.00496316
SLC1A4	905.92	1.95553	0.0940043	20.8025	4.11e-96	7.18e-94
TRIM22	474.212	1.9548	0.122081	16.0123	1.05e-57	7.49e-56
P4HA3	301.646	1.95043	0.136462	14.2929	2.42e-46	1.23e-44
GUCY1A2	269.458	1.94967	0.153714	12.6837	7.28e-37	2.68e-35
LAMP3	34.8989	1.94713	0.386961	5.03186	4.86e-07	2.77e-06
BEST3	7.23041	1.94508	0.837181	2.32337	0.0201595	0.0460763
HSPB3	9.57741	1.94348	0.77944	2.49343	0.0126515	0.0308156
DCAF12L1	6.88273	1.94309	0.871087	2.23065	0.0257043	0.0569363
ATP2B2	2.95696	1.93797	1.36555	1.41918	0.155845	0.254364
HRH1	17.8258	1.93784	0.559818	3.46155	0.000537074	0.00182948
GPR158	113.871	1.9377	0.247283	7.83597	4.65e-15	5.92e-14
HSPB7	62.487	1.93646	0.292078	6.62995	3.36e-11	3.02e-10
IL18	93.1895	1.93127	0.236177	8.17723	2.9e-16	4.05e-15
SYCE3	3.67323	1.93107	1.14158	1.69157	0.0907276	0.164416
KY	2.02776	1.92957	1.59153	1.21239	0.225361	0.339996
MOCOS	134.586	1.92776	0.231645	8.32203	8.65e-17	1.26e-15
CD163L1	3.3506	1.92599	1.31686	1.46256	0.143588	0.238126
MYL1	5.61717	1.92486	0.948112	2.03021	0.0423354	0.0866744
ARSJ	866.282	1.92335	0.101358	18.9758	2.71e-80	3.57e-78
TRIB3	617.05	1.92166	0.10166	18.9027	1.08e-79	1.39e-77
PODXL	1573.26	1.92165	0.091458	21.0113	5.17e-98	9.59e-96
NPAS3	12.5268	1.91509	0.634991	3.01594	0.00256183	0.00744468
PALMD	47.2852	1.91289	0.3517	5.43897	5.36e-08	3.47e-07
BIRC3	99.6546	1.9124	0.230431	8.29924	1.05e-16	1.51e-15
JAKMIP3	50.0129	1.9103	0.328914	5.8079	6.33e-09	4.52e-08
CAVIN2	92.5337	1.90938	0.260161	7.33921	2.15e-13	2.37e-12
VSTM2L	81.6317	1.90843	0.257764	7.40378	1.32e-13	1.48e-12
C9orf152	3.01579	1.90724	1.28905	1.47958	0.138986	0.232101
NXPE4	3.76691	1.90612	1.31905	1.44506	0.14844	0.24435
CFI	156.633	1.90214	0.184593	10.3045	6.72e-25	1.51e-23
MS4A12	2.94693	1.90192	1.35259	1.40613	0.159686	0.259301
TGM2	9399.02	1.90159	0.183525	10.3615	3.71e-25	8.49e-24
FAT3	462.217	1.89808	0.129388	14.6697	1.01e-48	5.53e-47
LANCL3	12.9309	1.89743	0.635756	2.98453	0.00284011	0.00819109
LAMA4	1378.84	1.89723	0.0885738	21.4198	8.74e-102	1.77e-99
WFDC1	225.298	1.89582	0.1563	12.1293	7.38e-34	2.48e-32
WDR64	2.99189	1.89569	1.35762	1.39633	0.162616	0.263316
VAX2	4.08436	1.89545	1.18161	1.60413	0.108686	0.190657
ICA1L	268.746	1.89304	0.159811	11.8455	2.27e-32	7.23e-31
CLUL1	41.6935	1.88915	0.355892	5.30821	1.11e-07	6.9e-07
SPTA1	33.0717	1.88906	0.412901	4.57509	4.76e-06	2.34e-05
GSDME	1336.3	1.88617	0.0875722	21.5385	6.79e-103	1.41e-100
GRIK2	98.383	1.88592	0.236758	7.96559	1.64e-15	2.17e-14
LIMCH1	383.393	1.88417	0.130953	14.3881	6.15e-47	3.21e-45
NPIPB8	2.08831	1.88135	1.6276	1.1559	0.24772	0.366782
STAT4	15.3225	1.88047	0.574234	3.27475	0.00105755	0.00335512
IRX5	2.02648	1.8787	1.55064	1.21156	0.225679	0.340311
TNFRSF9	63.2627	1.87807	0.304133	6.17518	6.61e-10	5.24e-09
SLC24A3	60.5858	1.87242	0.30595	6.12002	9.36e-10	7.34e-09
VSIR	448.246	1.87107	0.125325	14.9298	2.11e-50	1.21e-48
HGD	8.54181	1.87009	0.781162	2.39398	0.0166666	0.0391148
ADM2	574.252	1.86817	0.105801	17.6575	8.91e-70	8.62e-68
ITGB3	239.14	1.86307	0.184388	10.104	5.3e-24	1.13e-22
SLC40A1	1256.39	1.86124	0.0792626	23.482	6.23e-122	1.8e-119
SLCO4A1	4.19923	1.86022	1.08598	1.71295	0.0867222	0.158522
MYOCD	265.532	1.8601	0.171818	10.826	2.59e-27	6.52e-26
ERICH5	75.9499	1.85588	0.261414	7.09939	1.25e-12	1.28e-11
RDH10	3279.75	1.85431	0.070389	26.3437	6.06e-153	3.05e-150
CGREF1	82.6715	1.85249	0.259753	7.13173	9.91e-13	1.03e-11
DRD1	34.8264	1.85217	0.408201	4.53739	5.7e-06	2.77e-05
AGMAT	29.3142	1.84986	0.42912	4.31081	1.63e-05	7.37e-05
ABCC9	527.258	1.84877	0.129713	14.2528	4.31e-46	2.16e-44
COL16A1	3349.85	1.84823	0.0753608	24.5251	7.97e-133	2.76e-130
SLC35G5	2.03973	1.84775	1.66186	1.11186	0.266198	0.388071
SPIN2A	9.01688	1.8466	0.721581	2.55911	0.0104941	0.0260912
SSTR1	255.229	1.84337	0.154051	11.966	5.35e-33	1.75e-31
KLF2	49.4016	1.84226	0.324175	5.68292	1.32e-08	9.18e-08
GUCY1A1	695.654	1.84219	0.104518	17.6255	1.57e-69	1.49e-67
BHMT2	2.11092	1.84184	1.7184	1.07183	0.283795	0.40687
NT5C1B	3.37002	1.84135	1.35556	1.35837	0.174347	0.278176
IQCJ-SCHIP1	228.903	1.8411	0.168612	10.9192	9.33e-28	2.41e-26
PVALEF	2.10852	1.84025	1.7103	1.07598	0.281934	0.404873
TAP2	64.973	1.83985	0.278018	6.61773	3.65e-11	3.27e-10
LIN7A	811.431	1.83823	0.0943598	19.4811	1.59e-84	2.31e-82
NR3C2	37.97	1.83803	0.363332	5.05883	4.22e-07	2.43e-06
MGLL	78.0054	1.8359	0.273646	6.70904	1.96e-11	1.79e-10
ANKK1	20.3733	1.83572	0.505204	3.63362	0.000279476	0.00101435
SLC16A11	3.48556	1.83543	1.15966	1.58273	0.113483	0.197672
ARHGAP23	1515.4	1.833	0.0929704	19.716	1.57e-86	2.4e-84
MGAM	4.17646	1.83246	1.04673	1.75065	0.0800057	0.148264
UBA7	54.4943	1.83112	0.310096	5.905	3.53e-09	2.61e-08
NXPH2	187.514	1.82495	0.167442	10.899	1.17e-27	3e-26
CAMK2B	12.6373	1.82233	0.649555	2.80551	0.00502368	0.0136139
TACR2	4.21231	1.82144	1.06123	1.71634	0.0860996	0.157623
IFNE	16.7496	1.81929	0.572534	3.1776	0.00148499	0.00455081
CFAP251	122.485	1.81678	0.239133	7.59739	3.02e-14	3.57e-13
CACNA1E	4.4036	1.81528	1.20777	1.503	0.132838	0.22356
TMEM255A	206.195	1.81463	0.168059	10.7976	3.53e-27	8.82e-26
ACER1	2.12688	1.81402	1.61735	1.1216	0.262032	0.383398
CACNA1A	86.6724	1.81385	0.267169	6.78915	1.13e-11	1.06e-10
GPR78	77.1822	1.81253	0.26773	6.76998	1.29e-11	1.21e-10
CXCR2	11.3881	1.81186	0.655437	2.76435	0.00570369	0.0152157
HSPG2	8237.71	1.80941	0.175172	10.3293	5.19e-25	1.18e-23
ARHGAP9	6.63348	1.80665	0.912613	1.97964	0.0477437	0.0963661
CAMK1D	171.244	1.80426	0.191366	9.42831	4.17e-21	7.68e-20
BEST1	35.7291	1.80355	0.395847	4.55618	5.21e-06	2.55e-05
SARM1	812.43	1.80302	0.094258	19.1285	1.46e-81	1.96e-79
SYNC	78.1453	1.80263	0.249892	7.21361	5.45e-13	5.77e-12
F2RL2	114.844	1.8018	0.22946	7.85234	4.08e-15	5.2e-14
MS4A4E	6.05179	1.80151	0.890373	2.02332	0.0430404	0.0879559
MEOX1	51.862	1.79946	0.308654	5.83003	5.54e-09	3.99e-08
TXNDC2	3.18493	1.79877	1.29076	1.39358	0.163446	0.264303
AP003108.2	15.6326	1.79863	0.562538	3.19735	0.00138695	0.00428399
HK3	2.09325	1.79317	1.55567	1.15267	0.249048	0.368275
CD244	18.7172	1.79276	0.533691	3.35917	0.000781783	0.00255412
ASB5	11.792	1.78895	0.679041	2.63453	0.00842541	0.0214653
FRK	36.9209	1.7879	0.39575	4.51774	6.25e-06	3.02e-05
BDNF	765.994	1.78732	0.0968876	18.4473	5.48e-76	6.32e-74
CEP295NL	9.48792	1.78527	0.715589	2.49482	0.0126021	0.0307192
ITGA4	1265.68	1.78376	0.093251	19.1285	1.46e-81	1.96e-79
IL1R1	2265.22	1.78206	0.0952153	18.7161	3.66e-78	4.42e-76
RHOH	4.4001	1.77982	1.10327	1.61323	0.106695	0.187886
COL8A2	80.8358	1.7786	0.245206	7.2535	4.06e-13	4.37e-12
GPNMB	37.6728	1.77795	0.377096	4.71485	2.42e-06	1.25e-05
SIK1B	126.877	1.77664	0.218008	8.14941	3.66e-16	5.04e-15
OGFRL1	6664.01	1.77565	0.0795986	22.3075	3.12e-110	7.85e-108
CD6	8.07208	1.7737	0.833471	2.12808	0.0333301	0.0708503
NR4A3	33.9169	1.77158	0.413595	4.28337	1.84e-05	8.24e-05
FAM166A	3.76704	1.77141	1.2178	1.4546	0.145779	0.241041
SPTBN5	56.8954	1.77005	0.305889	5.78657	7.18e-09	5.1e-08
TNFRSF11B	17.4374	1.76932	0.566987	3.12056	0.00180505	0.005427
CHRNB4	2.58359	1.76805	1.38672	1.27499	0.202313	0.313017
ABCA3	141.629	1.76747	0.193759	9.12203	7.37e-20	1.28e-18
GLP2R	3.31557	1.7648	1.30598	1.35132	0.176593	0.281098
GLIS3	255.602	1.76315	0.147423	11.9599	5.77e-33	1.88e-31
BANK1	55.9579	1.76014	0.299027	5.88622	3.95e-09	2.9e-08
ABLIM3	31.8418	1.75741	0.408055	4.3068	1.66e-05	7.48e-05
TRHDE	105.257	1.75621	0.225263	7.79628	6.38e-15	7.98e-14
SLC18A3	29.5656	1.75568	0.424776	4.13319	3.58e-05	0.000153537
VPREB3	1.83197	1.7546	1.68058	1.04405	0.296464	0.420925
AHSG	1.83197	1.7546	1.68058	1.04405	0.296464	0.420925
SFRP5	32.8474	1.75356	0.39854	4.39996	1.08e-05	5.03e-05
AMZ1	29.9534	1.7481	0.422693	4.13562	3.54e-05	0.000152045
CFAP57	4.94037	1.74764	1.09285	1.59916	0.109785	0.192272
DUSP26	17.2847	1.74375	0.533811	3.26661	0.00108844	0.00344401
ENOX1	40.5561	1.74292	0.346873	5.02467	5.04e-07	2.87e-06
H2BC18	8.21739	1.74253	0.786598	2.21527	0.0267415	0.0588569
MSC	83.7625	1.74201	0.257437	6.76672	1.32e-11	1.23e-10
PLD4	6.951	1.73954	0.851912	2.04193	0.0411585	0.0846319
C1orf198	1550.47	1.7387	0.0797548	21.8006	2.29e-105	5.02e-103
GATM	235.244	1.73848	0.178259	9.75259	1.8e-22	3.57e-21
TMEM47	783.007	1.73715	0.0931461	18.6498	1.27e-77	1.52e-75
ITLN2	12.8543	1.73584	0.642062	2.70353	0.00686069	0.0179246
RBP4	27.7105	1.73511	0.449554	3.85962	0.000113562	0.000442597
MPV17L	33.2976	1.73278	0.489812	3.53764	0.000403719	0.00141611
CHAC1	474.607	1.73152	0.11694	14.807	1.32e-49	7.45e-48
RP1L1	3.29851	1.73002	1.19435	1.4485	0.147478	0.243075
SLC14A2	2.87772	1.72961	1.53644	1.12573	0.260281	0.381409
SEMA5A	2671.69	1.72884	0.0903919	19.1261	1.53e-81	2.04e-79
PTGFR	455.425	1.72835	0.120315	14.3652	8.55e-47	4.4e-45
REPS2	48.1491	1.72805	0.32789	5.27021	1.36e-07	8.37e-07
SCUBE2	40.7293	1.72675	0.347647	4.96698	6.8e-07	3.8e-06
PALM2AKAP2	3169.36	1.72636	0.0695224	24.8317	4.08e-136	1.59e-133
PTX3	34.1947	1.72388	0.385816	4.46816	7.89e-06	3.75e-05
CDH3	1894.99	1.72191	0.0702073	24.526	7.8e-133	2.76e-130
CCN3	23.9668	1.72181	0.469364	3.66838	0.000244091	0.000895939
CRIM1	3463.9	1.72061	0.0721606	23.8442	1.16e-125	3.55e-123
LRRC17	118.719	1.72034	0.202136	8.51081	1.73e-17	2.62e-16
CPZ	260.803	1.71806	0.148236	11.59	4.63e-31	1.4e-29
SLC1A3	2998.68	1.71782	0.0829313	20.7138	2.6e-95	4.5e-93
CD36	67.543	1.71532	0.264896	6.47544	9.45e-11	8.16e-10
DUOX2	79.8569	1.71494	0.659228	2.60144	0.00928322	0.0234303
ARHGAP22	73.7275	1.71452	0.293331	5.84502	5.07e-09	3.67e-08
SLC35G6	7.85317	1.71273	0.788023	2.17346	0.0297459	0.0644944
RPEL1	1.84343	1.71159	1.68924	1.01323	0.31095	0.437188
MFSD6	52.3083	1.70912	0.306595	5.57452	2.48e-08	1.67e-07
THBD	133.272	1.70904	0.226126	7.55792	4.1e-14	4.8e-13
SYBU	750.377	1.70883	0.11561	14.781	1.94e-49	1.09e-47
KCNK7	3.73305	1.70622	1.26294	1.351	0.176697	0.281189
ALPK1	92.6854	1.70277	0.232174	7.33403	2.23e-13	2.46e-12
FTCDNL1	7.10457	1.70196	0.858415	1.98268	0.0474033	0.0957411
KCNQ3	9.96138	1.70084	0.727263	2.33869	0.0193516	0.0445239
OR1F1	3.08521	1.69562	1.25914	1.34665	0.178093	0.282879
GPRC5A	1335.49	1.69188	0.096872	17.4651	2.64e-68	2.42e-66
COL1A1	175587	1.69136	0.0686637	24.6325	5.66e-134	2.15e-131
B3GAT1	12.0619	1.69039	0.630524	2.68093	0.00734186	0.019038
NCR3LG1	165.938	1.68996	0.192598	8.77459	1.72e-18	2.76e-17
CASP4	5.90893	1.68873	1.00352	1.68279	0.092415	0.166932
ANGPTL1	36.7972	1.68591	0.358952	4.69675	2.64e-06	1.35e-05
ADRA1D	4.07233	1.68307	1.15848	1.45283	0.146271	0.241598
ACVR1C	24.8118	1.68274	0.478104	3.51962	0.000432168	0.0015064
CLMP	921.08	1.68272	0.0957005	17.5832	3.31e-69	3.09e-67
QRFP	10.9744	1.67821	0.680455	2.46631	0.0136513	0.0329467
SPTB	25.421	1.67581	0.502055	3.3379	0.000844133	0.00273886
FRZB	328.359	1.673	0.14094	11.8703	1.69e-32	5.41e-31
RUNDC3B	7.07878	1.67255	0.832045	2.01017	0.0444128	0.0903573
SKP2	2068.76	1.6711	0.073125	22.8526	1.38e-115	3.76e-113
LAYN	425.005	1.66907	0.119633	13.9516	3.08e-44	1.46e-42
E2F8	104.088	1.66674	0.248351	6.7112	1.93e-11	1.77e-10
AL157935.2	2.32374	1.66529	1.50192	1.10878	0.267526	0.389607
RNF103-CHMP3	2.30748	1.66415	1.63155	1.01998	0.307737	0.433963
GAL3ST1	2.31561	1.66238	1.53014	1.08643	0.27729	0.400038
IRF8	202.878	1.66122	0.16884	9.83906	7.64e-23	1.54e-21
ABHD1	3.74742	1.65864	1.12904	1.46907	0.141814	0.235913
SPATA21	1.90177	1.65807	1.53198	1.0823	0.279118	0.401977
SCN2B	45.4214	1.65729	0.325437	5.09252	3.53e-07	2.06e-06
GHR	516.245	1.65718	0.117243	14.1345	2.33e-45	1.14e-43
COL1A2	249460	1.65695	0.0539044	30.7387	1.73e-207	1.5e-204
KCNK6	1086.95	1.65657	0.0924691	17.9148	9.03e-72	9.25e-70
EPS8	828.613	1.6558	0.0962878	17.1963	2.83e-66	2.5e-64
PLAAT4	4.28444	1.65501	1.03769	1.5949	0.110735	0.193664
BICDL1	75.8744	1.65497	0.263002	6.29259	3.12e-10	2.57e-09
SLC16A8	42.962	1.6548	0.348557	4.74756	2.06e-06	1.08e-05
TMEM130	37.809	1.65272	0.368433	4.48581	7.26e-06	3.47e-05
SBSPON	3504.16	1.65184	0.0903782	18.277	1.26e-74	1.4e-72
GOLGA8M	7.16009	1.65166	0.844452	1.9559	0.050477	0.100824
CHST13	2.87222	1.6515	1.5175	1.08831	0.27646	0.399332
POLN	10.9578	1.65035	0.690999	2.38836	0.0169239	0.0395993
UGCG	1178.48	1.64807	0.086971	18.9497	4.44e-80	5.82e-78
TLL2	35.8035	1.64579	0.37589	4.37838	1.2e-05	5.51e-05
KLHDC7B	15.0266	1.64528	0.553098	2.97467	0.00293306	0.00842484
MCC	2887.36	1.64516	0.099198	16.5846	9e-62	6.98e-60
STK32B	63.575	1.64482	0.282835	5.81548	6.05e-09	4.33e-08
CAVIN1	9826.49	1.64378	0.0644075	25.5215	1.14e-143	4.92e-141
IL18R1	168.705	1.64239	0.180692	9.08945	9.95e-20	1.72e-18
COL10A1	1.88723	1.63911	1.78924	0.916094	0.359618	0.488244
TNC	33091.3	1.63679	0.059428	27.5424	5.46e-167	3.54e-164
LGR5	71.8004	1.63506	0.280237	5.83458	5.39e-09	3.89e-08
APOL1	3.86408	1.63482	1.09334	1.49526	0.134846	0.226352
SLC7A14	99.0379	1.63352	0.229248	7.12556	1.04e-12	1.08e-11
ACSM3	61.4693	1.62832	0.279553	5.82473	5.72e-09	4.12e-08
KCNG3	1.99945	1.6271	1.82208	0.892988	0.371864	0.500338
RNASE7	2.39242	1.62611	1.41008	1.15321	0.248826	0.368052
MFSD14A	4.84741	1.62576	1.07793	1.50821	0.1315	0.22181
SIK1	52.9842	1.62411	0.315997	5.13963	2.75e-07	1.62e-06
CGAS	6.68008	1.62233	0.882486	1.83836	0.066009	0.126402
PIEZO2	115.493	1.62158	0.235007	6.90012	5.2e-12	5.05e-11
TMEM132E	16.2167	1.62118	0.543081	2.98515	0.00283435	0.00817902
B3GNT9	267.833	1.62047	0.174118	9.30676	1.32e-20	2.37e-19
PLPP3	2813.08	1.6167	0.096685	16.7214	9.16e-63	7.47e-61
APLN	2.37043	1.61318	1.41706	1.1384	0.254952	0.375083
HIVEP3	248.491	1.60968	0.160256	10.0444	9.72e-24	2.05e-22
GGT5	15.8866	1.6087	0.584568	2.75194	0.00592425	0.015734
ITGA9	674.13	1.60604	0.106648	15.0593	3e-51	1.78e-49
LRRTM4	362.893	1.60361	0.13865	11.5659	6.14e-31	1.84e-29
CYTL1	212.376	1.60338	0.157793	10.1613	2.95e-24	6.36e-23
LCT	2.42014	1.60282	1.35507	1.18283	0.236875	0.354142
SLC27A2	3.12872	1.6026	1.18961	1.34716	0.177928	0.282645
POTEF	91.4519	1.59825	0.257946	6.19607	5.79e-10	4.62e-09
ARHGAP8	47.5805	1.59741	0.356829	4.47669	7.58e-06	3.61e-05
TRIM14	171.421	1.59725	0.176428	9.05327	1.39e-19	2.38e-18
STEAP4	5.1315	1.59421	1.01118	1.57658	0.114891	0.199513
SCT	5.76676	1.59351	0.950821	1.67593	0.0937521	0.168934
C9orf131	2.40801	1.59272	1.39891	1.13854	0.254896	0.375035
ANXA3	474.34	1.59016	0.119817	13.2715	3.39e-40	1.44e-38
EPHA5	15.8505	1.58842	0.548891	2.89386	0.00380533	0.0106132
MTUS1	70.3233	1.58663	0.260372	6.09372	1.1e-09	8.58e-09
PSMB10	40.4266	1.58598	0.338476	4.68564	2.79e-06	1.43e-05
ZNF541	15.8086	1.58595	0.545475	2.90747	0.00364367	0.0102246
ANGPTL7	12.3778	1.58586	0.627226	2.52837	0.0114594	0.0282565
MMP24	182.084	1.58524	0.185347	8.55282	1.2e-17	1.83e-16
ODF3	2.39526	1.58515	1.39999	1.13226	0.257526	0.37819
COL11A1	15277.6	1.58437	0.0614438	25.7858	1.28e-146	5.87e-144
ARHGAP28	648.319	1.58345	0.121206	13.0641	5.28e-39	2.12e-37
FMOD	564.237	1.58049	0.10577	14.9428	1.74e-50	1.01e-48
PHOX2A	2.44958	1.57953	1.60905	0.981654	0.32627	0.453165
RIN3	120.026	1.57877	0.212735	7.42128	1.16e-13	1.31e-12
LDHAL6B	2.43862	1.57657	1.44948	1.08768	0.276737	0.399479
NGFR	42.9721	1.5744	0.349516	4.5045	6.65e-06	3.2e-05
TMIE	3.56727	1.56758	1.15037	1.36267	0.172987	0.276517
GREM1	1851.33	1.56683	0.0752393	20.8246	2.59e-96	4.64e-94
ADTRP	15.602	1.56667	0.548187	2.85791	0.00426437	0.0117692
RIN2	1386.17	1.56662	0.0887857	17.6449	1.11e-69	1.06e-67
MASP1	932.917	1.56552	0.106518	14.6972	6.72e-49	3.71e-47
MS4A6A	11.3314	1.56459	0.631852	2.47619	0.0132791	0.0321632
PARD3B	439.404	1.56403	0.129025	12.1219	8.09e-34	2.7e-32
BCL2	27.4295	1.56391	0.447013	3.49859	0.000467728	0.00161983
COL3A1	410178	1.56366	0.0702471	22.2594	9.14e-110	2.26e-107
AC022415.2	8.68357	1.5629	0.837791	1.86551	0.0621104	0.12008
ZMAT4	61.3048	1.56287	0.279148	5.59872	2.16e-08	1.46e-07
SFTPD	35.5745	1.56243	0.411642	3.79562	0.000147277	0.000562593
CCDC184	471.912	1.56205	0.110637	14.1187	2.91e-45	1.42e-43
SQOR	13.5252	1.56198	0.608334	2.56763	0.0102395	0.0255397
F5	491.349	1.56049	0.132652	11.7637	6e-32	1.87e-30
SDSL	170.921	1.55792	0.177998	8.75245	2.09e-18	3.33e-17
WWC1	309.609	1.55766	0.14438	10.7886	3.9e-27	9.67e-26
COL12A1	3255.17	1.55716	0.184781	8.42709	3.54e-17	5.25e-16
OSMR	1168.48	1.5567	0.0830663	18.7405	2.32e-78	2.82e-76
CD22	10.7802	1.55354	0.780879	1.98948	0.046648	0.0943501
SH3TC2	108.92	1.55257	0.233202	6.65764	2.78e-11	2.52e-10
N4BP2L1	49.4826	1.55243	0.31035	5.0022	5.67e-07	3.2e-06
RASGRP3	56.787	1.55187	0.337097	4.60364	4.15e-06	2.06e-05
TUBA4A	28.683	1.55057	0.44578	3.47833	0.000504558	0.00173121
TENT5C	416.603	1.54874	0.134967	11.4749	1.76e-30	5.17e-29
FZD1	1048.25	1.54745	0.10011	15.4575	6.72e-54	4.31e-52
PAQR5	37.7003	1.54727	0.357963	4.32243	1.54e-05	7.01e-05
PTPRH	121.529	1.54696	0.201043	7.69466	1.42e-14	1.71e-13
NAALADL2	46.4364	1.54651	0.333497	4.63727	3.53e-06	1.77e-05
PAPPA	3097.49	1.54464	0.0983913	15.699	1.54e-55	1.05e-53
ACOT12	4.58504	1.54446	1.00067	1.54343	0.122725	0.210285
ARFGEF3	57.86	1.54439	0.317528	4.86378	1.15e-06	6.26e-06
QRICH2	105.608	1.54433	0.24953	6.18894	6.06e-10	4.82e-09
TFEC	7.97726	1.54281	0.893185	1.72731	0.0841116	0.154585
IPO4	2.17783	1.54103	1.56896	0.982199	0.326002	0.452872
NDUFA4L2	39.9567	1.54031	0.36404	4.23116	2.32e-05	0.000102571
TREH	8.65782	1.5389	0.810685	1.89827	0.0576608	0.112547
MAP3K7CL	96.941	1.53885	0.269376	5.71265	1.11e-08	7.79e-08
PLEKHG4	149.819	1.53674	0.198659	7.73557	1.03e-14	1.26e-13
CDK15	65.244	1.53502	0.287593	5.33747	9.43e-08	5.93e-07
SERPINC1	2.92909	1.53443	1.26715	1.21093	0.225921	0.340642
HAS3	23.6703	1.53419	0.455058	3.37142	0.000747815	0.00245706
NEURL1	45.096	1.53261	0.320937	4.77541	1.79e-06	9.46e-06
KIF4B	1.68126	1.53223	1.68216	0.91087	0.362364	0.490992
AFF3	145.459	1.52949	0.195426	7.82642	5.02e-15	6.37e-14
COL5A2	47138.9	1.52901	0.0754155	20.2745	2.16e-91	3.4e-89
BBOX1	2.92047	1.52724	1.29195	1.18212	0.237159	0.354399
LRRC32	1020.97	1.52691	0.0861391	17.7261	2.64e-70	2.57e-68
ARHGEF38	2.47879	1.52663	1.5146	1.00794	0.313482	0.439835
DNAH12	17.7524	1.52536	0.503174	3.03147	0.00243367	0.00709908
SLC2A9	11.8233	1.52524	0.763851	1.99678	0.0458496	0.0929162
ACTR3C	1.67203	1.52248	1.64515	0.925439	0.354737	0.483222
DEPP1	97.7786	1.52172	0.236455	6.43556	1.23e-10	1.05e-09
AL110118.2	1.66279	1.51627	1.68576	0.899456	0.36841	0.496757
PTGER3	21.5213	1.51466	0.489146	3.09654	0.00195793	0.00583817
GRM7	4.05425	1.514	1.16614	1.29831	0.194182	0.303219
IHO1	2.44467	1.50856	1.38468	1.08946	0.27595	0.398779
GLS	8146.14	1.50671	0.0613309	24.5669	2.85e-133	1.03e-130
DLGAP1	116.182	1.50631	0.214409	7.02542	2.13e-12	2.15e-11
SLC16A14	239.846	1.50541	0.146365	10.2854	8.2e-25	1.82e-23
SLC5A12	59.3339	1.50448	0.311049	4.83678	1.32e-06	7.11e-06
MAB21L3	11.4744	1.50427	0.677299	2.22098	0.0263521	0.0581478
ANGPTL8	3.93488	1.50128	2.83368	0.529799	0.596251	0.707668
TLR2	24.6342	1.49994	0.444313	3.37585	0.000735876	0.00242295
GDPGP1	14.4082	1.49969	0.575874	2.60419	0.0092091	0.023264
TIMM23B	265.431	1.49939	0.154251	9.72041	2.47e-22	4.87e-21
HEG1	6621.02	1.49924	0.0762361	19.6658	4.23e-86	6.34e-84
THY1	11143.1	1.49784	0.0791134	18.9328	6.12e-80	7.94e-78
THRB	106.43	1.49773	0.232526	6.44115	1.19e-10	1.01e-09
COX7A1	9.28813	1.49559	0.710928	2.10371	0.0354038	0.0744905
DDAH1	1052.87	1.49438	0.0958421	15.5922	8.23e-55	5.48e-53
C5	25.1257	1.4934	0.430083	3.47235	0.00051593	0.00176518
ANKRD35	8.06751	1.49336	0.805325	1.85436	0.0636875	0.122726
MYOZ2	3.93523	1.49254	1.13569	1.31422	0.188773	0.296396
PRR18	4.93742	1.49054	1.04894	1.421	0.155316	0.253739
TEX52	30.0337	1.48992	0.401481	3.71106	0.000206391	0.000767145
TNFSF10	1.69513	1.48954	1.64641	0.904719	0.365615	0.494192
CSPG5	13.2302	1.48936	0.650327	2.29017	0.0220112	0.0497826
ECM2	22.1743	1.48899	0.478429	3.11225	0.00185664	0.00556492
NEBL	1650.18	1.48855	0.103073	14.4418	2.82e-47	1.5e-45
KRT17	33.177	1.48841	0.423142	3.51752	0.000435592	0.00151664
ZFHX4	294.771	1.488	0.146132	10.1826	2.37e-24	5.16e-23
CSMD2	225.242	1.48784	0.154187	9.64961	4.93e-22	9.58e-21
LIFR	2927.35	1.48727	0.0980275	15.172	5.42e-52	3.31e-50
CSRP1	14329.4	1.48591	0.167391	8.87692	6.87e-19	1.13e-17
MUC4	7.53628	1.48549	0.806762	1.8413	0.065578	0.125669
IL17B	10.6891	1.48533	0.765716	1.93979	0.0524051	0.103943
HLA-B	496.634	1.48528	0.151391	9.81092	1.01e-22	2.02e-21
SLC7A11	1165.1	1.4821	0.0822547	18.0185	1.4e-72	1.48e-70
MTUS2	22.036	1.48141	0.476251	3.11057	0.00186728	0.00559359
KCNN2	324.031	1.47864	0.141729	10.4328	1.76e-25	4.08e-24
HOXC12	31.7898	1.47792	0.397397	3.719	0.000200015	0.000745401
SLC12A8	304.294	1.47788	0.153056	9.65577	4.65e-22	9.04e-21
ENG	25.4265	1.47763	0.453894	3.25546	0.00113208	0.00356758
APBB1IP	7.42065	1.47541	0.78509	1.87929	0.0602055	0.116825
PYCR1	1480.87	1.47499	0.102673	14.3659	8.47e-47	4.37e-45
ATP13A5	9.8416	1.47397	0.810426	1.81876	0.0689473	0.13087
C17orf97	19.3163	1.47132	0.49614	2.96553	0.00302163	0.00865848
DTX3L	296.094	1.46512	0.133366	10.9857	4.48e-28	1.17e-26
LAMA1	3430.88	1.46509	0.082587	17.74	2.06e-70	2.03e-68
MYLK3	70.3372	1.4647	0.358773	4.08254	4.45e-05	0.000188114
TAGLN	16206	1.46244	0.085988	17.0074	7.23e-65	6.09e-63
SLC16A7	164.576	1.46139	0.172444	8.47457	2.36e-17	3.55e-16
AC093827.5	1.72506	1.46118	1.87436	0.779565	0.435647	0.563379
ATP10A	39.908	1.46069	0.335159	4.35821	1.31e-05	6.01e-05
ALX4	18.7659	1.45958	0.539748	2.70418	0.00684731	0.0178926
ARL9	9.2218	1.45932	0.726345	2.00912	0.0445241	0.0905482
UPB1	13.1106	1.45838	0.651537	2.23837	0.0251971	0.056003
DMGDH	16.5203	1.45621	0.552142	2.63739	0.00835475	0.0213008
NSG1	530.087	1.4562	0.102748	14.1724	1.36e-45	6.69e-44
MBOAT4	4.48582	1.45597	1.0186	1.42938	0.152894	0.250623
C5orf49	18.2149	1.4553	0.526636	2.76339	0.00572038	0.015255
MT2A	179.949	1.45363	0.199701	7.27903	3.36e-13	3.64e-12
FAM124A	6.65646	1.45178	0.822344	1.76541	0.0774945	0.144228
CDH20	7.46021	1.45045	0.791823	1.83179	0.0669825	0.127935
KCNIP2	85.7117	1.4494	0.239582	6.04969	1.45e-09	1.12e-08
ECT2L	5.45088	1.44859	0.95103	1.52318	0.127715	0.216717
SOX30	3.40431	1.44816	1.31099	1.10463	0.269319	0.391595
KCNJ12	75.9241	1.44498	0.266836	5.41523	6.12e-08	3.93e-07
SLC9C2	3.26762	1.44268	1.29752	1.11187	0.266192	0.388071
DLC1	1444.77	1.44037	0.0748674	19.2389	1.75e-82	2.48e-80
PSEN2	11.7349	1.43942	0.642411	2.24066	0.0250484	0.0556972
NKPD1	11.5812	1.43911	0.674535	2.13349	0.0328846	0.0699937
HEATR9	3.96968	1.43889	1.07438	1.33927	0.180482	0.285914
PNPLA1	3.65296	1.4376	1.20397	1.19405	0.232457	0.348641
MDGA1	19.4296	1.43718	0.53004	2.71146	0.00669872	0.0175574
GFAP	2.73871	1.43551	1.33929	1.07185	0.283788	0.40687
ARHGEF37	28.2818	1.43498	0.406672	3.5286	0.000417759	0.00146009
GAS1	744.893	1.43465	0.106288	13.4977	1.61e-41	7.2e-40
TENM3	3519.02	1.43447	0.0653022	21.9666	6.02e-107	1.36e-104
GK	85.5386	1.43444	0.241707	5.93465	2.94e-09	2.19e-08
C3orf49	2.21572	1.43416	1.4469	0.991195	0.32159	0.447983
DERL3	7.13869	1.43333	0.820693	1.74648	0.0807268	0.149369
STPG2	2.72707	1.43261	1.44172	0.993687	0.320375	0.44669
SEPTIN4	17.9007	1.43206	0.54199	2.64222	0.00823643	0.0210493
OGN	32.3842	1.43064	0.384759	3.71829	0.000200577	0.000747317
TSFM	8.39633	1.42459	0.775245	1.8376	0.0661211	0.126585
PAQR4	41.4452	1.42379	0.348048	4.0908	4.3e-05	0.000181879
AGAP6	219.063	1.42339	0.181208	7.85505	4e-15	5.1e-14
DPY19L2	36.0392	1.42181	0.375684	3.78458	0.000153968	0.000586425
GALNT18	336.43	1.4216	0.17255	8.23875	1.74e-16	2.46e-15
CRYM	39.3347	1.42018	0.354635	4.00462	6.21e-05	0.000254917
VIPR2	4.43053	1.41986	1.05256	1.34895	0.177352	0.281959
ASNS	87.8162	1.41735	0.248465	5.70442	1.17e-08	8.15e-08
SLC38A5	463.261	1.41711	0.116661	12.1473	5.93e-34	2.01e-32
FAM71F2	96.2647	1.4161	0.228136	6.20725	5.39e-10	4.32e-09
MSTN	3.73087	1.41577	1.11944	1.26471	0.205976	0.317989
APOL3	7.89213	1.41538	0.831259	1.7027	0.0886249	0.161363
PIK3C2B	923.242	1.41532	0.0897418	15.7711	4.92e-56	3.39e-54
MAPK4	4.48215	1.41477	0.995781	1.42077	0.155385	0.253824
CXCL16	29.7907	1.41437	0.428729	3.29899	0.000970336	0.00310627
FHOD3	497.138	1.41362	0.107178	13.1895	1.01e-39	4.2e-38
MCOLN2	18.6281	1.41094	0.513181	2.7494	0.00597047	0.0158487
USP18	23.9274	1.41031	0.438802	3.214	0.00130898	0.00406909
MYL9	12813.1	1.40963	0.0651939	21.6221	1.11e-103	2.37e-101
MYO1H	18.0976	1.40609	0.504955	2.78459	0.00535961	0.0144313
SLC7A7	360.167	1.40556	0.121771	11.5426	8.04e-31	2.39e-29
DGKB	7.7037	1.40449	0.758945	1.85058	0.0642306	0.123589
RASSF5	30.7032	1.40359	0.416743	3.36801	0.00075714	0.00248351
CASP1	4.50112	1.40346	0.989132	1.41888	0.155934	0.254401
SFXN2	559.093	1.40018	0.10752	13.0224	9.12e-39	3.61e-37
PKMYT1	135.841	1.39994	0.207968	6.73153	1.68e-11	1.55e-10
AC240274.1	647.815	1.39924	0.0970857	14.4125	4.32e-47	2.27e-45
PSMB9	4.25608	1.39879	1.0624	1.31662	0.187965	0.295372
ADORA2B	304.602	1.39663	0.143241	9.7502	1.84e-22	3.64e-21
CCNP	4.93155	1.3966	0.959747	1.45517	0.145621	0.240882
NMI	84.2638	1.3941	0.247145	5.64083	1.69e-08	1.16e-07
LAT2	17.8661	1.39232	0.516242	2.69704	0.00699596	0.0182413
TMED6	7.77029	1.39232	0.837898	1.66168	0.0965764	0.173077
KCNIP3	59.2527	1.39028	0.280457	4.95718	7.15e-07	3.99e-06
ESRRG	16.4458	1.38997	0.536301	2.59177	0.00954836	0.0240314
KCNH1	7.7464	1.38958	0.771513	1.80111	0.0716848	0.135094
ZNF185	651.652	1.38783	0.111668	12.4282	1.84e-35	6.47e-34
MME	13611.9	1.38753	0.0714505	19.4195	5.28e-84	7.55e-82
NOSTRIN	17.2153	1.38644	0.537253	2.58061	0.00986258	0.0247183
SERPIND1	3.21645	1.38636	1.21062	1.14516	0.252143	0.371763
PPP1R3G	12.9869	1.38501	0.610595	2.26829	0.0233113	0.0523353
TNFAIP8L3	16.5921	1.38419	0.548009	2.52586	0.0115417	0.0284415
PARP12	80.4121	1.38333	0.256718	5.38854	7.1e-08	4.53e-07
PTPN20	55.3314	1.38331	0.297849	4.64434	3.41e-06	1.72e-05
NPAS2	69.2146	1.38123	0.289861	4.76513	1.89e-06	9.92e-06
RNF207	579.855	1.38109	0.113789	12.1373	6.7e-34	2.26e-32
THEM5	7.96351	1.37969	0.766314	1.80043	0.0717931	0.135266
STAMBPL1	37.7764	1.37863	0.380805	3.62031	0.000294254	0.00106327
RAPH1	111.008	1.37828	0.236474	5.82847	5.59e-09	4.03e-08
NBPF1	828.447	1.37768	0.0959282	14.3615	9.02e-47	4.62e-45
P3H2	242.95	1.37735	0.150306	9.16367	5.02e-20	8.79e-19
THSD1	60.2254	1.37586	0.286302	4.80564	1.54e-06	8.22e-06
RGPD1	2.2328	1.37408	1.41056	0.974138	0.329988	0.457431
FILIP1L	3562.71	1.37292	0.0643186	21.3456	4.29e-101	8.56e-99
NHLRC1	9.26125	1.37205	0.688955	1.9915	0.0464263	0.0939506
TTC9	263.466	1.37199	0.137814	9.95536	2.39e-23	4.92e-22
RBP5	61.6277	1.37162	0.31026	4.42088	9.83e-06	4.59e-05
KCNMA1	1280.59	1.37147	0.0953697	14.3806	6.85e-47	3.57e-45
C13orf46	20.7389	1.37097	0.508707	2.69501	0.00703855	0.018337
C17orf107	4.08716	1.3707	1.15751	1.18418	0.236341	0.353445
BNC1	483.68	1.37058	0.127003	10.7917	3.77e-27	9.36e-26
SLC38A4	30.9846	1.36957	0.379535	3.60854	0.000307924	0.00110702
MACROD2	34.4818	1.36857	0.366326	3.73592	0.000187027	0.000701364
FAM151A	3.28451	1.3676	1.15722	1.18179	0.237288	0.354554
KLRG2	11.4774	1.36736	0.644673	2.12101	0.033921	0.0718463
ENTPD2	2.48304	1.36708	1.44539	0.945816	0.344243	0.471898
NKX3-1	53.1406	1.36628	0.299883	4.55605	5.21e-06	2.55e-05
ARNTL2	210.611	1.36297	0.167487	8.13772	4.03e-16	5.53e-15
CNTNAP3B	40.5323	1.36237	0.346047	3.93696	8.25e-05	0.00033193
ITGA11	5387.42	1.36	0.0813938	16.7089	1.13e-62	9.11e-61
JSRP1	4.75982	1.35992	0.979348	1.3886	0.164956	0.26633
TNS1	3642.42	1.35965	0.0757041	17.96	4.01e-72	4.19e-70
ZNF239	121.388	1.35939	0.208739	6.51242	7.39e-11	6.46e-10
PLXNA2	1245.36	1.3593	0.0974529	13.9483	3.22e-44	1.53e-42
HSPA2	164.118	1.35556	0.171683	7.89568	2.89e-15	3.73e-14
CDK3	2.03174	1.35549	1.60973	0.84206	0.399754	0.527384
CTNNA3	24.0176	1.35547	0.432354	3.1351	0.00171794	0.00518814
DSEL	165.768	1.35536	0.185311	7.31397	2.59e-13	2.84e-12
KCNS2	4.24717	1.35403	1.00612	1.3458	0.178367	0.283169
GP6	6.71568	1.35353	0.849234	1.59382	0.110976	0.194021
FAM111A	334.262	1.35348	0.126506	10.6989	1.03e-26	2.51e-25
NT5C1A	17.731	1.35161	0.509385	2.65342	0.00796804	0.0204641
DES	91.637	1.35138	0.249413	5.41824	6.02e-08	3.87e-07
CCDC87	8.36211	1.35077	0.846075	1.59652	0.110373	0.193141
SHFL	55.1653	1.35074	0.29208	4.62456	3.75e-06	1.88e-05
HSPB6	49.778	1.35061	0.345977	3.90375	9.47e-05	0.000376771
F8A3	3.79938	1.34991	1.07401	1.25689	0.208794	0.321352
ADAMTS5	324.365	1.34937	0.129443	10.4245	1.92e-25	4.44e-24
OPN5	1.72256	1.34893	1.89053	0.713518	0.475526	0.600441
MUTYH	20.3017	1.34891	0.579358	2.32828	0.019897	0.0455674
LURAP1L	111.667	1.34815	0.238187	5.66003	1.51e-08	1.04e-07
TTLL11	115.14	1.34784	0.229641	5.86934	4.38e-09	3.19e-08
GAS2	44.2234	1.34565	0.319522	4.21145	2.54e-05	0.000111505
CALB2	69.6408	1.34399	0.27414	4.90259	9.46e-07	5.18e-06
CNKSR2	58.8775	1.34273	0.281832	4.76429	1.9e-06	9.95e-06
CNN1	2797.21	1.34157	0.0997371	13.4511	3.04e-41	1.34e-39
CAV2	801.44	1.34135	0.1023	13.1119	2.81e-39	1.14e-37
TEN1-CDK3	9.31015	1.33939	0.74688	1.79331	0.0729231	0.13703
DIRAS3	18.9144	1.33899	0.555754	2.40933	0.0159819	0.0377754
ASB12	3.82821	1.33774	1.09263	1.22433	0.220829	0.33504
PCDH1	28.0955	1.33767	0.407243	3.28469	0.00102095	0.00325093
CFAP298-TCP10L	3.28846	1.33707	1.27192	1.05122	0.293158	0.417462
MYO7B	184.269	1.33692	0.17836	7.49562	6.6e-14	7.58e-13
CDH8	698.353	1.33674	0.103713	12.8889	5.2e-38	2e-36
GAPDHS	2.74016	1.3363	1.39696	0.956582	0.338778	0.466625
METTL1	137.058	1.33591	0.187363	7.13004	1e-12	1.04e-11
TRPV6	6.97145	1.33501	0.872775	1.52961	0.126113	0.214725
COBLL1	1724.27	1.33495	0.0862185	15.4834	4.49e-54	2.93e-52
CLDN18	34.1229	1.33467	0.382874	3.48594	0.000490414	0.00168752
ACMSD	4.24829	1.33417	1.07706	1.23871	0.215453	0.329097
MAD1L1	5.4599	1.33389	0.987959	1.35015	0.176968	0.281493
CNNM1	64.5371	1.33358	0.287271	4.64222	3.45e-06	1.74e-05
CDKN2C	64.2875	1.33316	0.326664	4.08114	4.48e-05	0.000189094
LDLRAP1	690.85	1.33295	0.0984905	13.5338	9.88e-42	4.44e-40
AP002495.1	54.266	1.33139	0.306381	4.34554	1.39e-05	6.35e-05
GLIPR1	566.837	1.33073	0.124675	10.6736	1.35e-26	3.27e-25
MCM5	653.418	1.33044	0.123043	10.8128	2.99e-27	7.5e-26
MN1	144.539	1.3277	0.188093	7.05877	1.68e-12	1.71e-11
GABPB2	203.386	1.32656	0.175214	7.57111	3.7e-14	4.35e-13
RUNX1T1	438.119	1.32327	0.120979	10.938	7.58e-28	1.97e-26
ACVR2A	445.505	1.32185	0.112092	11.7925	4.27e-32	1.35e-30
EFCAB8	3.55244	1.32167	1.18272	1.11748	0.263787	0.385394
NEK5	818.023	1.32152	0.0878436	15.044	3.78e-51	2.24e-49
SLC6A9	437.446	1.31822	0.11152	11.8204	3.06e-32	9.73e-31
TIFA	63.7427	1.31688	0.283669	4.64232	3.45e-06	1.74e-05
TWIST2	14.1671	1.31632	0.567615	2.31903	0.0203934	0.0465359
EVA1A	88.9681	1.31583	0.237575	5.53856	3.05e-08	2.03e-07
CDKL4	1.98537	1.31522	1.52377	0.863138	0.388062	0.515848
XYLT1	2091.43	1.31338	0.0726255	18.0843	4.24e-73	4.55e-71
MBNL3	1682.73	1.3133	0.312263	4.20576	2.6e-05	0.000114186
SLC4A9	2.03507	1.31136	1.58913	0.825208	0.409254	0.536644
COPZ2	625.217	1.31113	0.118237	11.089	1.42e-28	3.8e-27
NFIC	1054.6	1.3111	0.0903411	14.5128	1.01e-47	5.36e-46
MPZL3	45.0265	1.30912	0.331007	3.95496	7.65e-05	0.000309483
FOXP1	504.916	1.3089	0.113196	11.5631	6.34e-31	1.89e-29
DMC1	35.8845	1.30883	0.373331	3.50582	0.000455199	0.0015789
LANCL2	777.352	1.30841	0.0988153	13.241	5.09e-40	2.15e-38
TPPP	56.7356	1.30832	0.284821	4.5935	4.36e-06	2.16e-05
HNMT	186.14	1.30811	0.162164	8.06657	7.23e-16	9.77e-15
WDR76	163.389	1.30721	0.178929	7.30573	2.76e-13	3.01e-12
PDLIM3	988.183	1.30583	0.0873269	14.9534	1.48e-50	8.6e-49
CDHR5	20.7083	1.30455	0.552282	2.36211	0.0181714	0.042132
TPPP2	6.78993	1.30426	0.825685	1.57961	0.114196	0.198559
ST6GALNAC6	7.36602	1.30243	0.774825	1.68094	0.0927754	0.167445
FOXD4	6.93146	1.3003	0.805456	1.61437	0.106448	0.187518
HRNR	6.27605	1.29842	0.863158	1.50426	0.132514	0.223087
PPP2R2B	964.665	1.29806	0.104051	12.4752	1.02e-35	3.62e-34
MAT1A	7.33812	1.29698	0.767398	1.6901	0.0910088	0.164849
SERPINB9	1642.72	1.29663	0.0703904	18.4206	8.98e-76	1.03e-73
NBPF3	263.769	1.29641	0.139726	9.27825	1.72e-20	3.09e-19
HSF2BP	31.6507	1.29324	0.38707	3.34109	0.00083451	0.00271046
MAP3K20	1269.22	1.29293	0.0777484	16.6297	4.25e-62	3.32e-60
TPM2	13072.7	1.29239	0.0775792	16.6589	2.61e-62	2.08e-60
ZNF367	88.0872	1.29111	0.244705	5.27621	1.32e-07	8.12e-07
LGALS4	1.99972	1.28635	1.52051	0.845999	0.397554	0.525285
HOXD3	18.3289	1.28628	0.488117	2.63519	0.00840906	0.0214271
VCAM1	93.6696	1.28622	0.246393	5.22019	1.79e-07	1.08e-06
GABRA5	57.6035	1.28378	0.291072	4.41051	1.03e-05	4.81e-05
PTPRT	6.43718	1.28376	0.869805	1.47592	0.139966	0.233487
CCDC171	110.785	1.2836	0.216306	5.93416	2.95e-09	2.2e-08
ZNF559-ZNF177	1.9916	1.2826	1.60981	0.796742	0.425601	0.55305
AC006254.1	10.6572	1.28088	0.705545	1.81545	0.0694546	0.131528
TMEM37	60.7806	1.28078	0.340279	3.76392	0.000167273	0.000633228
A1BG	9.18478	1.2783	0.728459	1.7548	0.0792937	0.147067
DGAT2	30.7726	1.27788	0.416425	3.06869	0.00215001	0.00635495
ELOVL5	4304.86	1.27734	0.0686119	18.6169	2.34e-77	2.78e-75
MAB21L2	45.124	1.27713	0.319382	3.99874	6.37e-05	0.00026099
ADGRB3	8.17641	1.27711	0.770556	1.65738	0.0974425	0.174453
PDGFRL	177.094	1.27691	0.166757	7.65732	1.9e-14	2.27e-13
CPQ	325.508	1.27687	0.130721	9.7679	1.55e-22	3.08e-21
SGMS1	661.612	1.27629	0.100653	12.6801	7.63e-37	2.8e-35
PRSS12	128.75	1.27612	0.200851	6.35354	2.1e-10	1.76e-09
CYBRD1	1173.54	1.27588	0.103199	12.3633	4.13e-35	1.44e-33
DMD	3608.99	1.27572	0.262478	4.86028	1.17e-06	6.36e-06
KCTD16	223.741	1.27551	0.153293	8.32074	8.74e-17	1.27e-15
ICAM1	90.0994	1.27459	0.233442	5.45998	4.76e-08	3.1e-07
LDHD	10.481	1.27433	0.648321	1.96559	0.0493463	0.0990232
SMIM18	2.57002	1.27422	1.3108	0.972097	0.331002	0.458551
SERPING1	1601.66	1.27384	0.0848325	15.0159	5.77e-51	3.41e-49
FSHR	40.4465	1.27327	0.35151	3.62228	0.000292016	0.00105628
TMEM179	46.6641	1.27293	0.307909	4.13412	3.56e-05	0.000152959
SGPP2	28.6306	1.27211	0.392289	3.24279	0.00118366	0.00370987
MUCL3	1.98298	1.27173	1.61487	0.787513	0.430982	0.558458
COL20A1	23.3754	1.27014	0.450891	2.81696	0.00484799	0.0131963
MELTF	1447.89	1.27009	0.0817525	15.5358	1.99e-54	1.3e-52
F7	17.5922	1.26915	0.546861	2.3208	0.0202978	0.0463721
FHL1	4897.26	1.26891	0.0791933	16.0229	8.84e-58	6.35e-56
LYST	412.263	1.26889	0.12321	10.2985	7.15e-25	1.6e-23
EML1	379.031	1.26873	0.121051	10.4809	1.06e-25	2.48e-24
SLC22A5	328.49	1.26799	0.128672	9.85441	6.56e-23	1.32e-21
NBEA	408.63	1.26679	0.125253	10.1139	4.79e-24	1.03e-22
LRATD2	2411.48	1.26624	0.0803407	15.7609	5.78e-56	3.97e-54
ZEB1	444.899	1.26444	0.116983	10.8088	3.13e-27	7.82e-26
SLC7A1	1566.97	1.26444	0.0869896	14.5355	7.22e-48	3.86e-46
FANCB	58.7133	1.26219	0.295808	4.26692	1.98e-05	8.84e-05
DHRS2	90.0136	1.26206	0.238852	5.28387	1.26e-07	7.82e-07
IFI35	76.2382	1.26202	0.25536	4.94212	7.73e-07	4.29e-06
PTPN14	940.49	1.26071	0.112803	11.1761	5.34e-29	1.46e-27
CDH7	190.752	1.25962	0.161235	7.81236	5.61e-15	7.07e-14
SGCA	4.5038	1.25916	1.07788	1.16818	0.242735	0.361099
EIF3C	472.98	1.25637	0.110127	11.4084	3.8e-30	1.1e-28
IL1RAP	242.447	1.25594	0.1455	8.63188	6.04e-18	9.41e-17
ATL3	1034.9	1.25566	0.0873921	14.3681	8.21e-47	4.25e-45
POTEE	29.1776	1.25543	0.430517	2.9161	0.0035444	0.0099766
PDC	5.97835	1.25538	0.955632	1.31367	0.188959	0.296628
SEMA3C	6686.8	1.25502	0.0795193	15.7826	4.1e-56	2.85e-54
MOBP	3.62385	1.25501	1.10674	1.13397	0.256806	0.377417
SYK	4.66264	1.25451	1.02658	1.22203	0.221695	0.335995
SLC9A3R1	626.051	1.25435	0.10699	11.7241	9.6e-32	2.97e-30
AK4P3	4.6037	1.2543	0.961673	1.30429	0.192135	0.300523
PLAC9	140.182	1.25385	0.189585	6.61369	3.75e-11	3.36e-10
ZNF536	5.17991	1.25363	0.95853	1.30787	0.190919	0.299012
CLIC5	2.01993	1.25361	1.51653	0.826633	0.408445	0.535945
CNKSR3	316.357	1.25334	0.127744	9.81136	1.01e-22	2.01e-21
KLHL35	36.0117	1.25214	0.384663	3.25516	0.00113328	0.00357064
ZDHHC14	319.314	1.25181	0.130602	9.58487	9.26e-22	1.77e-20
PTPN7	5.58429	1.2503	1.00257	1.24709	0.212364	0.325528
FXYD7	4.69966	1.25019	1.06958	1.16887	0.242456	0.360823
LMOD3	3.54976	1.24832	1.17221	1.06493	0.286907	0.410312
TLN1	8581.5	1.24791	0.06819	18.3005	8.2e-75	9.19e-73
MYH11	29.5352	1.24771	0.394486	3.16288	0.00156217	0.00476202
NIN	2188.72	1.24691	0.0715616	17.4243	5.4e-68	4.91e-66
SNAI3	24.1493	1.24577	0.43653	2.8538	0.00432001	0.0119079
ACR	2.57927	1.24541	1.39616	0.892026	0.372379	0.500728
NRIP2	74.6849	1.24433	0.250634	4.96472	6.88e-07	3.85e-06
MYH9	33563.6	1.2437	0.0687919	18.0791	4.65e-73	4.96e-71
FLNA	44879.9	1.24358	0.0590315	21.0664	1.62e-98	3.07e-96
SEC14L6	10.9174	1.2421	0.659576	1.88318	0.0596759	0.115971
MTRR	629.127	1.24106	0.0985017	12.5994	2.13e-36	7.74e-35
MEGF9	185.379	1.24087	0.166313	7.46105	8.58e-14	9.78e-13
TMX4	1263.93	1.24027	0.0940466	13.1879	1.03e-39	4.28e-38
H3-2	13.0662	1.23968	0.582727	2.12738	0.0333886	0.0709469
DNAJB7	2.56763	1.23949	1.28994	0.960895	0.336605	0.464206
ALPG	7.69526	1.23886	0.760286	1.62947	0.103213	0.182914
EGF	163.75	1.23835	0.174182	7.10952	1.16e-12	1.2e-11
MIF	2.05055	1.23681	1.52479	0.811132	0.41729	0.544979
LONRF2	106.12	1.23659	0.247764	4.991	6.01e-07	3.39e-06
AL391650.1	2.04291	1.23576	1.49531	0.826421	0.408565	0.536057
ALDH1L2	2808	1.23554	0.078705	15.6984	1.55e-55	1.05e-53
ZPLD1	3.34229	1.23528	1.33096	0.928113	0.353349	0.481795
AP000944.5	10.7822	1.23106	0.684774	1.79776	0.0722149	0.135896
NANS	911.256	1.23018	0.101428	12.1286	7.45e-34	2.5e-32
PRMT8	3.05448	1.22851	1.36283	0.901442	0.367353	0.495871
IFIT2	20.0952	1.22658	0.47021	2.60857	0.00909207	0.0229795
CELF2	601.599	1.22627	0.11278	10.8731	1.55e-27	3.97e-26
RGS9BP	13.5537	1.22561	0.627241	1.95398	0.050704	0.101161
ADGRF3	14.021	1.22528	0.589295	2.07924	0.0375954	0.0784132
NUDT4B	16.3222	1.22515	0.527522	2.32247	0.0202076	0.0461728
ROR2	681.711	1.22447	0.0978105	12.5188	5.89e-36	2.1e-34
GJD3	10.4891	1.22223	0.659166	1.8542	0.0637105	0.122755
MTRNR2L12	2.58661	1.22114	1.27388	0.958598	0.337761	0.465513
RCVRN	1.84074	1.21963	1.81891	0.670527	0.502522	0.625552
SPTBN4	20.671	1.21958	0.458105	2.66224	0.00776236	0.0200084
RPS6KA2	996.136	1.21901	0.0957378	12.7328	3.88e-37	1.45e-35
GRM3	2.59184	1.21856	1.35138	0.901713	0.36721	0.495789
ABAT	540.137	1.21761	0.108042	11.2698	1.85e-29	5.2e-28
PSTPIP1	6.52347	1.2174	0.836943	1.45458	0.145785	0.241041
DOCK5	756.582	1.21726	0.115504	10.5387	5.73e-26	1.36e-24
CCDC192	3.64154	1.21706	1.09952	1.1069	0.268336	0.39051
KCNIP4	102.667	1.21689	0.234513	5.18899	2.11e-07	1.26e-06
CHRNB2	9.34754	1.21599	0.769481	1.58028	0.114043	0.198338
JPH1	289.313	1.21412	0.14623	8.3028	1.02e-16	1.47e-15
KIF6	22.566	1.21381	0.450022	2.69721	0.00699226	0.0182347
ANXA11	2552.65	1.21364	0.0642519	18.8888	1.41e-79	1.8e-77
TLL1	1460.89	1.21327	0.0810155	14.9757	1.06e-50	6.19e-49
NPNT	8860.41	1.21308	0.0802589	15.1145	1.3e-51	7.75e-50
ADCY9	588.906	1.2126	0.134423	9.02075	1.87e-19	3.17e-18
TBX10	6.94689	1.2117	0.808433	1.49883	0.133918	0.225036
PLA2G4C	11.8644	1.21155	0.64512	1.87803	0.0603775	0.11713
RAB30	646.642	1.20978	0.102621	11.7888	4.46e-32	1.4e-30
SPAG1	114.994	1.20939	0.220481	5.48524	4.13e-08	2.71e-07
MX1	40.8222	1.20747	0.332489	3.63161	0.000281659	0.00102084
WDR4	190.193	1.20659	0.168201	7.17349	7.31e-13	7.67e-12
PLSCR4	63.6261	1.20599	0.273544	4.40878	1.04e-05	4.84e-05
RIMBP2	69.6547	1.20569	0.259629	4.64389	3.42e-06	1.72e-05
XG	8.98451	1.20568	0.707515	1.7041	0.0883627	0.161011
VWA7	14.5575	1.20533	0.552066	2.18332	0.0290126	0.0630535
CHRM4	10.8118	1.20439	0.691216	1.74242	0.0814356	0.150412
DPYD	23.0264	1.20435	0.440171	2.7361	0.00621715	0.0164335
VWA3B	2.61895	1.20435	1.3245	0.909288	0.363198	0.491865
MYH7B	56.2468	1.20265	0.312292	3.85105	0.000117613	0.000457241
ETV7	8.9883	1.20254	0.794543	1.5135	0.130152	0.219947
GAS7	2031.13	1.20223	0.0932225	12.8963	4.72e-38	1.82e-36
NAIP	5.21929	1.20206	0.938039	1.28146	0.200033	0.310228
KLB	3.34169	1.20064	1.17101	1.0253	0.30522	0.431039
KIRREL2	10.8477	1.20061	0.656581	1.82858	0.0674633	0.128633
B3GNT4	4.59057	1.19941	1.11186	1.07875	0.2807	0.403547
SEL1L3	249.521	1.19905	0.153224	7.82548	5.06e-15	6.41e-14
PLS3	7489.92	1.19721	0.0720536	16.6155	5.38e-62	4.19e-60
CLSTN2	1427.04	1.19641	0.0976306	12.2545	1.59e-34	5.48e-33
NID1	7477.8	1.19635	0.0667992	17.9096	9.93e-72	1.01e-69
LMO7	828.715	1.19605	0.0894489	13.3714	8.89e-41	3.87e-39
DIAPH3	558.001	1.19573	0.110408	10.8301	2.48e-27	6.26e-26
ZNF844	70.9568	1.19547	0.26579	4.49781	6.87e-06	3.3e-05
SORT1	2156.42	1.19463	0.0789743	15.1268	1.08e-51	6.46e-50
MDGA2	39.9473	1.19407	0.348017	3.43108	0.000601188	0.00202397
SLC7A5	6030.22	1.19407	0.0607167	19.6662	4.2e-86	6.34e-84
ULBP2	34.7783	1.19402	0.387671	3.07997	0.00207023	0.0061401
ADM	374.356	1.19352	0.128285	9.30364	1.36e-20	2.44e-19
AGAP5	18.8862	1.19239	0.496027	2.40389	0.0162219	0.0382327
NPIPB6	7.80058	1.19088	0.758575	1.56989	0.116442	0.201765
TEAD4	226.393	1.19083	0.148351	8.02713	9.98e-16	1.34e-14
GCLM	523.099	1.18991	0.11056	10.7626	5.17e-27	1.27e-25
SLC1A5	2418.48	1.18896	0.0750532	15.8415	1.61e-56	1.13e-54
CELA2B	7.55613	1.18883	0.855288	1.38998	0.164536	0.265873
ANGPTL2	1315.75	1.18825	0.0757213	15.6924	1.71e-55	1.15e-53
CELF5	34.1784	1.1878	0.428774	2.77023	0.00560167	0.014982
SLC22A4	52.9746	1.18712	0.292312	4.06112	4.88e-05	0.000204847
GRIN1	3.91581	1.18677	1.10294	1.076	0.281927	0.404873
WFDC13	7.05407	1.18497	0.816888	1.45058	0.146896	0.242416
GPR176	228.768	1.18437	0.14629	8.09607	5.68e-16	7.75e-15
SENP3-EIF4A1	3.08855	1.18416	1.28527	0.921326	0.35688	0.485377
HSD17B6	235.056	1.1839	0.150079	7.88848	3.06e-15	3.94e-14
STKLD1	25.1812	1.18385	0.443235	2.67094	0.00756396	0.0195423
ALDH8A1	8.92383	1.18355	0.732276	1.61626	0.106038	0.187047
SMIM5	10.12	1.18302	0.678918	1.7425	0.0814207	0.150403
GALNT9	8.89408	1.18112	0.728638	1.621	0.105018	0.185604
MTCL1	452.303	1.17989	0.114317	10.3212	5.65e-25	1.27e-23
GNAO1	52.6316	1.17971	0.315678	3.73707	0.000186178	0.000698513
WARS1	3814.9	1.17942	0.0637882	18.4897	2.5e-76	2.91e-74
SPTAN1	14659.8	1.17932	0.0669435	17.6167	1.84e-69	1.72e-67
TUFT1	486.317	1.17912	0.116286	10.1399	3.68e-24	7.88e-23
KITLG	873.446	1.17887	0.0903351	13.05	6.35e-39	2.53e-37
CBX6	1315.51	1.17832	0.0830428	14.1893	1.07e-45	5.27e-44
UFSP1	21.6208	1.17799	0.497193	2.36929	0.0178225	0.0414342
MSH4	7.73285	1.17665	0.757826	1.55267	0.120502	0.207232
ANKRD61	47.8951	1.17582	0.331158	3.55064	0.000384299	0.00135532
FAM13B	860.047	1.17498	0.0855057	13.7415	5.73e-43	2.62e-41
POLR3H	290.854	1.17308	0.162638	7.21282	5.48e-13	5.8e-12
C9	2.85054	1.17269	1.2553	0.934193	0.350204	0.478764
COMTD1	57.8783	1.17262	0.293768	3.99167	6.56e-05	0.000268146
TMPRSS11B	4.42306	1.17173	0.99281	1.18021	0.237915	0.355321
PXMP4	101.144	1.17121	0.243131	4.81717	1.46e-06	7.79e-06
CATSPER3	6.99686	1.17038	0.841586	1.39068	0.164322	0.265582
LYG2	9.32847	1.17015	0.703489	1.66335	0.0962416	0.172581
FAM9C	2.0319	1.16993	1.77817	0.657942	0.510575	0.632812
DCT	3.32876	1.16921	1.1746	0.995415	0.319534	0.445876
AC087289.3	2.84241	1.16842	1.25573	0.930478	0.352124	0.480467
LOX	15645.2	1.16681	0.0598718	19.4885	1.37e-84	2.02e-82
ZC3HAV1L	246.864	1.16582	0.155402	7.50194	6.29e-14	7.24e-13
TCF21	58.8988	1.16364	0.293155	3.96936	7.21e-05	0.000292656
GPR27	30.2442	1.16309	0.404138	2.87796	0.00400258	0.0111156
SPRN	13.8461	1.16262	0.559137	2.07932	0.0375884	0.0784089
FERMT1	261.758	1.16222	0.147751	7.86605	3.66e-15	4.69e-14
PCED1B	235.002	1.16211	0.153711	7.56031	4.02e-14	4.72e-13
RAB37	9.97127	1.16063	0.661161	1.75544	0.0791846	0.146917
UCHL3	5.95204	1.15789	0.897853	1.28962	0.197183	0.306939
GPR34	4.88225	1.15724	1.05443	1.0975	0.272423	0.39507
GOLGA8H	8.11506	1.15668	0.765135	1.51173	0.130603	0.220608
AC097625.1	2.92796	1.15594	1.34585	0.858889	0.390402	0.517822
CD3EAP	25.9493	1.15506	0.462381	2.49806	0.0124876	0.0304926
SPDYE1	25.3795	1.15459	0.487314	2.36929	0.0178223	0.0414342
MAP3K14	132.474	1.15409	0.199269	5.79163	6.97e-09	4.96e-08
EHD2	5264.06	1.15331	0.0650151	17.7392	2.09e-70	2.05e-68
KCNV2	5.72566	1.15314	0.876719	1.31529	0.188413	0.29592
GALNT7	2664.27	1.1521	0.0682549	16.8793	6.39e-64	5.26e-62
CCL7	17.1769	1.15179	0.557743	2.06509	0.038914	0.0807955
CHRM2	390.442	1.14986	0.152304	7.54977	4.36e-14	5.09e-13
GOLGA8O	7.33458	1.14949	0.781088	1.47166	0.141113	0.234961
EFNA5	257.739	1.14815	0.148003	7.75762	8.65e-15	1.07e-13
FZD8	554.585	1.148	0.108862	10.5455	5.33e-26	1.27e-24
NCOA7	654.297	1.14662	0.108763	10.5424	5.51e-26	1.31e-24
TRIM58	828.591	1.14636	0.0974587	11.7625	6.09e-32	1.9e-30
CES4A	71.3382	1.14623	0.249115	4.6012	4.2e-06	2.08e-05
ATP7B	10243.7	1.14584	0.164553	6.96338	3.32e-12	3.29e-11
RAD50	57.094	1.14531	0.280694	4.08027	4.5e-05	0.000189753
CXCL5	7.58594	1.14484	0.789281	1.45049	0.146922	0.242416
NKD2	23.8307	1.14396	0.454497	2.51697	0.0118369	0.0290724
KIT	1858.27	1.14366	0.0970617	11.7828	4.78e-32	1.5e-30
REM1	1.81969	1.14339	1.71181	0.667943	0.50417	0.627183
LRRC36	8.94505	1.14255	0.698922	1.63473	0.102105	0.181218
JPH4	29.9727	1.14254	0.386861	2.95335	0.00314346	0.00896305
AADAC	8.69047	1.14207	0.722217	1.58135	0.113799	0.198084
STC1	465.034	1.14174	0.147398	7.74602	9.48e-15	1.16e-13
ANO4	768.718	1.14165	0.0902332	12.6522	1.09e-36	3.98e-35
CYP4X1	43.2337	1.14081	0.34506	3.30613	0.000945941	0.00303442
CEACAM19	271.959	1.1396	0.147413	7.73065	1.07e-14	1.3e-13
SNCAIP	895.739	1.1394	0.107861	10.5636	4.39e-26	1.05e-24
SIAE	348.633	1.13915	0.123613	9.2154	3.1e-20	5.49e-19
NODAL	2.89785	1.13867	1.30375	0.873376	0.382458	0.510348
MYL4	92.6203	1.13837	0.222189	5.12343	3e-07	1.76e-06
NPPB	1145.53	1.13772	0.337754	3.36847	0.000755856	0.00248034
ZNF575	27.5717	1.1372	0.424888	2.67648	0.00744006	0.0192702
KCNC1	6.58059	1.13697	0.860067	1.32195	0.186185	0.293189
GPT2	1279.2	1.13588	0.0749559	15.154	7.13e-52	4.34e-50
UCP2	543.952	1.13583	0.113927	9.96982	2.07e-23	4.26e-22
RGS11	88.9274	1.13456	0.242495	4.67868	2.89e-06	1.47e-05
IFITM3	4004.78	1.13333	0.0921406	12.3	9.06e-35	3.14e-33
ZNRF3	221.81	1.13323	0.150897	7.50999	5.91e-14	6.82e-13
RETREG1	103.906	1.1309	0.216264	5.22926	1.7e-07	1.03e-06
VEGFA	1962.92	1.13054	0.0734274	15.3967	1.72e-53	1.08e-51
RHOU	3610.47	1.13051	0.0661644	17.0864	1.87e-65	1.61e-63
FBXO4	70.6552	1.13031	0.252376	4.47868	7.51e-06	3.58e-05
CALML4	2.93419	1.13024	1.2433	0.909064	0.363316	0.491983
C16orf71	25.7482	1.13017	0.422908	2.67238	0.00753142	0.0194647
H3C2	2.39339	1.13009	1.38734	0.814577	0.415314	0.543082
HOXC5	7.59304	1.12957	0.83995	1.34481	0.178687	0.28359
SLC16A2	702.576	1.1294	0.101084	11.173	5.53e-29	1.51e-27
SPATC1	5.00404	1.12939	0.977836	1.15499	0.248094	0.367185
SSPN	87.3173	1.12928	0.236824	4.76845	1.86e-06	9.77e-06
BCAT1	7174.91	1.12864	0.0658069	17.1508	6.2e-66	5.4e-64
AKR1D1	7.18552	1.12859	0.821796	1.37332	0.169653	0.272418
MVP	723.256	1.12773	0.0973673	11.5822	5.07e-31	1.52e-29
COL6A6	54.9738	1.12762	0.293332	3.84418	0.000120955	0.000469412
SLC1A1	933.411	1.12694	0.0904521	12.459	1.25e-35	4.41e-34
ZBTB47	332.467	1.12665	0.127019	8.86989	7.32e-19	1.2e-17
ITPR2	905.837	1.12654	0.103841	10.8487	2.02e-27	5.12e-26
AP3M2	437.447	1.12587	0.112457	10.0115	1.36e-23	2.83e-22
TCAF2	34.1487	1.12549	0.435675	2.58332	0.00978553	0.024541
TMCO4	88.587	1.12532	0.244555	4.6015	4.19e-06	2.08e-05
KIAA1614	72.4902	1.12427	0.257286	4.36974	1.24e-05	5.72e-05
NEK6	1239.35	1.12419	0.0849193	13.2383	5.27e-40	2.23e-38
GINS2	251.662	1.12397	0.146958	7.64826	2.04e-14	2.43e-13
TRIM25	695.642	1.12273	0.0996202	11.2701	1.84e-29	5.19e-28
RARB	487.864	1.12258	0.136471	8.22571	1.94e-16	2.73e-15
MAL2	60.9151	1.12253	0.274089	4.0955	4.21e-05	0.000178475
IER3	240.049	1.12117	0.180394	6.21512	5.13e-10	4.12e-09
MBNL1	1390.52	1.12094	0.0803181	13.9562	2.88e-44	1.38e-42
MANEAL	9.16605	1.12086	0.739491	1.51572	0.12959	0.219207
FBN2	12088.7	1.1202	0.0731019	15.3238	5.3e-53	3.29e-51
CPA5	2.38538	1.12004	1.51255	0.740496	0.458999	0.584406
ERVV-1	1.8503	1.11913	1.56305	0.71599	0.473997	0.598948
AGFG2	123.199	1.11812	0.240132	4.65628	3.22e-06	1.63e-05
SV2C	2.90567	1.11798	1.26067	0.886815	0.375178	0.503189
ITGA1	4190.99	1.11795	0.0627608	17.8128	5.62e-71	5.58e-69
TNIP3	4.47931	1.11682	1.00597	1.11019	0.266918	0.38894
FSTL1	18198.8	1.11587	0.0580398	19.2259	2.25e-82	3.13e-80
MEF2B	2.85609	1.11583	1.33939	0.833089	0.404795	0.532366
CNGA1	12.1372	1.11552	0.627024	1.77907	0.0752285	0.1407
SLC47A2	4.43023	1.11532	1.04892	1.0633	0.287646	0.411104
DOCK2	8.69683	1.11527	0.726589	1.53494	0.124799	0.213046
TESC	9.22729	1.11499	0.685784	1.62587	0.103977	0.183975
XRCC4	1171.04	1.11452	0.099494	11.2019	3.99e-29	1.1e-27
TCTEX1D4	21.6094	1.11345	0.451776	2.46461	0.0137163	0.0330935
SLFN12L	3.47537	1.11338	1.12164	0.99264	0.320886	0.447289
MYO1E	1811.54	1.11278	0.0803945	13.8415	1.43e-43	6.69e-42
MLYCD	91.5312	1.11259	0.229467	4.8486	1.24e-06	6.73e-06
ADARB1	2143.9	1.11205	0.0874768	12.7125	5.04e-37	1.88e-35
SLC25A19	45.7026	1.11141	0.350077	3.17477	0.00149954	0.00458999
SH3TC1	25.3168	1.11118	0.41271	2.69239	0.00709416	0.0184602
SNTB1	31.0222	1.11055	0.415478	2.67295	0.00751885	0.0194451
PRR29	2.42172	1.10875	1.3722	0.808004	0.419088	0.546686
TAX1BP3	10.3431	1.10664	0.706565	1.56623	0.117295	0.202905
DEXI	58.6498	1.10631	0.281134	3.93517	8.31e-05	0.000333961
TAS2R10	8.08044	1.10492	0.85181	1.29714	0.194583	0.303652
CACNB4	121.277	1.10443	0.234321	4.7133	2.44e-06	1.26e-05
SP100	172.587	1.10069	0.165929	6.63348	3.28e-11	2.95e-10
POLR2J2	10.3968	1.09961	0.683278	1.60931	0.107548	0.189026
EPPK1	306.147	1.09842	0.167283	6.56628	5.16e-11	4.54e-10
FOXP3	6.67959	1.09783	0.814869	1.34725	0.177901	0.28263
CTSH	375.934	1.09689	0.118726	9.23885	2.49e-20	4.43e-19
GRK7	2.35176	1.09656	1.45003	0.756237	0.449507	0.576246
PTK2B	247.631	1.09641	0.156337	7.01311	2.33e-12	2.34e-11
INHBE	128.647	1.09511	0.199201	5.49755	3.85e-08	2.54e-07
SLC30A4	188.706	1.09466	0.162471	6.7376	1.61e-11	1.49e-10
C5AR1	83.4816	1.09463	0.240429	4.55281	5.29e-06	2.58e-05
PHGDH	6383.26	1.09437	0.0732975	14.9306	2.09e-50	1.2e-48
MGP	368.721	1.09417	0.122453	8.93548	4.05e-19	6.77e-18
ABO	320.544	1.09372	0.137121	7.97633	1.51e-15	2e-14
SCFD2	210.124	1.09337	0.154677	7.06872	1.56e-12	1.59e-11
CD200R1	23.6709	1.09336	0.451486	2.42168	0.0154488	0.0366489
LGI3	5.88004	1.09329	0.875087	1.24935	0.211538	0.324452
SLC9A2	11.0866	1.09283	0.642469	1.70098	0.0889466	0.16181
IL12RB2	19.5306	1.09181	0.515363	2.11854	0.0341297	0.0722294
GDPD5	253.748	1.09145	0.149054	7.3225	2.43e-13	2.67e-12
ADPRHL1	50.9673	1.09087	0.299159	3.64645	0.000265892	0.000969562
SPNS2	18.6563	1.09085	0.481764	2.26428	0.0235567	0.0528254
MAG	6.7038	1.09063	0.818833	1.33193	0.182883	0.289034
NDUFA7	8.41245	1.09032	0.727177	1.49939	0.133772	0.224888
SLC43A2	778.321	1.08943	0.092683	11.7543	6.71e-32	2.09e-30
DPP10	709.865	1.08917	0.0943273	11.5467	7.67e-31	2.28e-29
CCL2	77.5279	1.08866	0.268284	4.05786	4.95e-05	0.000207118
MRC1	6.59398	1.08855	0.81299	1.33894	0.180589	0.286026
BMP6	723.774	1.08852	0.0978404	11.1255	9.43e-29	2.55e-27
SPATA31E1	2.90217	1.08724	1.22277	0.88916	0.373917	0.501973
STARD6	4.19493	1.08723	1.04129	1.04412	0.296431	0.420925
HINT3	605.59	1.08625	0.10222	10.6267	2.24e-26	5.38e-25
FRAS1	1020.25	1.08547	0.116508	9.31673	1.2e-20	2.17e-19
AL590560.2	2.43257	1.08407	1.3253	0.817982	0.413367	0.541035
SLC26A1	66.2455	1.08245	0.278606	3.88525	0.000102225	0.000402744
C5orf46	2.42795	1.08082	1.34039	0.806347	0.420043	0.547518
CDKL3	19.2754	1.08042	0.501262	2.15539	0.0311311	0.0668924
AC079447.1	7.04703	1.07817	0.923257	1.16779	0.242893	0.36128
COL9A1	9.32861	1.07617	0.679173	1.58452	0.113074	0.197114
SCN8A	346.864	1.07533	0.139273	7.72104	1.15e-14	1.4e-13
OR10AD1	2.37707	1.0752	1.51849	0.708074	0.478899	0.603779
TNS3	4952.84	1.07486	0.0799348	13.4468	3.22e-41	1.41e-39
PCSK5	874.406	1.07467	0.0930125	11.5541	7.04e-31	2.1e-29
HERPUD1	1807.24	1.07324	0.0724702	14.8094	1.27e-49	7.22e-48
PCSK6	56.7845	1.07307	0.280894	3.82021	0.00013334	0.000513129
BAAT	3.93886	1.07205	1.1679	0.917924	0.358659	0.487363
SLC6A13	15.2852	1.06994	0.537278	1.9914	0.046437	0.0939599
RFLNA	125.561	1.06946	0.196445	5.44409	5.21e-08	3.38e-07
AC093512.2	20.351	1.06913	0.488387	2.1891	0.0285898	0.0622651
RAB36	127.474	1.06886	0.208529	5.12572	2.96e-07	1.74e-06
SRD5A2	2.36784	1.06869	1.51955	0.703296	0.481871	0.606438
PPME1	1376.31	1.0683	0.0788933	13.5411	8.95e-42	4.03e-40
TBC1D9	2469.15	1.0677	0.0691844	15.4327	9.86e-54	6.29e-52
COLCA2	3.16838	1.06761	1.26458	0.844236	0.398538	0.52627
FBLN5	1932.47	1.0676	0.0676295	15.786	3.89e-56	2.71e-54
MCM2	506.71	1.0675	0.113044	9.4433	3.61e-21	6.71e-20
GHRL	6.86001	1.06669	0.818311	1.30352	0.192397	0.300842
UNC13D	49.6272	1.06552	0.311165	3.42429	0.000616411	0.00206985
DBNDD2	6.08251	1.06548	0.862511	1.23533	0.216709	0.330116
EXO1	215.941	1.06535	0.153269	6.95084	3.63e-12	3.58e-11
NUTM2E	8.99686	1.06413	0.735859	1.44611	0.148146	0.243918
CPE	2226.71	1.06403	0.0851007	12.5031	7.18e-36	2.56e-34
CIITA	40.1529	1.06353	0.348132	3.05496	0.00225091	0.00662427
AGPAT3	1032.62	1.06077	0.0835424	12.6973	6.12e-37	2.27e-35
ATP10D	650.288	1.06076	0.103098	10.2889	7.91e-25	1.76e-23
IGFBP3	39163.1	1.0606	0.0668178	15.873	9.75e-57	6.87e-55
FLG	3.21981	1.06025	1.15519	0.917814	0.358716	0.487363
SYT12	1.88425	1.05966	1.5207	0.696826	0.485911	0.610191
CD14	14.433	1.05945	0.542909	1.95144	0.0510051	0.101671
PDE1C	5.50894	1.05932	0.986374	1.07395	0.282845	0.405806
ZMYND10	4.53579	1.05931	1.10183	0.961411	0.336346	0.46389
GALNTL6	11.1279	1.05914	0.677058	1.56432	0.117742	0.203384
PLXDC1	27.2617	1.05904	0.402605	2.63047	0.00852675	0.021688
MLC1	14.7994	1.05891	0.578861	1.8293	0.0673546	0.128457
TEX2	1437.65	1.05865	0.0721489	14.6731	9.58e-49	5.27e-47
PAH	1.83689	1.05824	1.65676	0.638737	0.522994	0.643729
ANKRD13A	644.041	1.05742	0.103254	10.241	1.3e-24	2.86e-23
TK1	735.326	1.05646	0.231562	4.56233	5.06e-06	2.47e-05
PAK6	5.09655	1.05636	0.921091	1.14685	0.251442	0.370969
RAD18	319.449	1.0559	0.133828	7.88996	3.02e-15	3.9e-14
GPR17	70.2074	1.05581	0.267458	3.94757	7.89e-05	0.000318446
HOGA1	11.1911	1.05492	0.623613	1.69163	0.0907172	0.164416
P2RY11	32.9467	1.05492	0.371858	2.83688	0.00455572	0.0124891
FAM81A	15.4212	1.05466	0.569503	1.8519	0.0640397	0.123298
WDR17	198.719	1.05424	0.160893	6.55245	5.66e-11	4.97e-10
FAM86B2	11.8761	1.05309	0.641814	1.64081	0.100837	0.179454
SH2B3	358.836	1.05282	0.122809	8.57282	1.01e-17	1.55e-16
YY2	22.4032	1.05243	0.450465	2.33632	0.0194746	0.0447785
SASH3	1.88025	1.05241	1.48675	0.707859	0.479033	0.603779
POLR1E	404.686	1.05091	0.115131	9.12796	6.98e-20	1.22e-18
CLEC18C	2.38447	1.05073	1.51324	0.694359	0.487457	0.611589
SLC22A13	3.81371	1.05062	1.14792	0.915236	0.360068	0.488595
SERTM1	3.48774	1.05029	1.21928	0.861405	0.389015	0.51663
PLAC8L1	16.7379	1.04994	0.594771	1.76529	0.0775147	0.144248
PPP1R3C	1023.04	1.04989	0.10319	10.1743	2.58e-24	5.6e-23
DPP4	4340.41	1.04919	0.0813401	12.8988	4.57e-38	1.77e-36
LAMC1	34798.2	1.04893	0.0613995	17.0837	1.96e-65	1.68e-63
CXCL2	3.80256	1.04871	1.10207	0.951583	0.341308	0.469487
PIM1	736.417	1.04847	0.0898863	11.6644	1.94e-31	5.92e-30
BTC	8.91939	1.04813	0.708464	1.47944	0.139022	0.232135
JPH2	585.474	1.04739	0.110785	9.45426	3.25e-21	6.07e-20
C3orf70	241.816	1.04696	0.148368	7.05653	1.71e-12	1.73e-11
C6orf132	134.727	1.0451	0.186069	5.61674	1.95e-08	1.32e-07
NRG2	6.98888	1.04485	0.827339	1.26291	0.206622	0.31867
CFAP221	32.0215	1.04331	0.402746	2.59049	0.00958402	0.0241094
KRT8	56065.9	1.04326	0.0664139	15.7085	1.32e-55	9.04e-54
NPY4R2	3.23306	1.04321	1.1703	0.891403	0.372713	0.500918
TNNI1	190.38	1.04225	0.16465	6.33008	2.45e-10	2.04e-09
E2F1	161.766	1.0422	0.177266	5.87931	4.12e-09	3.02e-08
NLRC3	19.9148	1.0421	0.496366	2.09947	0.0357758	0.0751311
PLEKHF1	88.2306	1.04198	0.228985	4.55042	5.35e-06	2.61e-05
SDS	5.04858	1.04075	0.983275	1.05845	0.289851	0.413685
ADCY5	21.1828	1.04058	0.449161	2.31671	0.0205195	0.0467893
ANKRD2	2.37758	1.04045	1.48226	0.701931	0.482722	0.606968
STARD13	247.901	1.04031	0.154156	6.74845	1.49e-11	1.39e-10
BAG1	730.471	1.03982	0.0975654	10.6577	1.61e-26	3.88e-25
GRID1	45.5488	1.03964	0.31284	3.32323	0.000889828	0.00287276
XYLB	90.7388	1.03902	0.229059	4.53605	5.73e-06	2.78e-05
NUDT4	4296.86	1.03894	0.0576758	18.0134	1.53e-72	1.61e-70
THTPA	77.4148	1.03887	0.255879	4.06001	4.91e-05	0.0002056
ADAMTS19	218.997	1.03873	0.146226	7.10363	1.22e-12	1.25e-11
DGKI	76.0472	1.03855	0.26506	3.91817	8.92e-05	0.000356389
CLEC18B	33.0693	1.03715	0.368591	2.81382	0.0048957	0.0133041
NAV3	461.356	1.03692	0.12254	8.46187	2.63e-17	3.94e-16
AKNA	482.634	1.03668	0.113795	9.11004	8.24e-20	1.43e-18
FAAH	49.5346	1.03593	0.325477	3.18281	0.00145855	0.00448214
CHI3L2	1.85937	1.0356	1.49762	0.691497	0.489253	0.613299
SKA1	165.892	1.03535	0.206151	5.02227	5.11e-07	2.91e-06
VDR	146.577	1.0347	0.178104	5.80953	6.26e-09	4.48e-08
BEGAIN	28.3377	1.0341	0.41298	2.504	0.0122797	0.0300414
CDC45	202.012	1.03119	0.169889	6.06981	1.28e-09	9.91e-09
GPRC5D	7.55523	1.03066	0.811775	1.26964	0.204214	0.315487
RPP25	720.815	1.03029	0.0987614	10.4321	1.77e-25	4.11e-24
CPNE5	17.7645	1.02861	0.501941	2.04926	0.040437	0.0834348
FBXL13	25.6653	1.02837	0.428821	2.39813	0.0164792	0.0387626
FAM186B	15.2631	1.0281	0.545835	1.88353	0.059628	0.115892
KCNE1	20.967	1.0279	0.486953	2.11089	0.0347817	0.0733103
ASIC4	53.8888	1.02714	0.301336	3.40862	0.000652927	0.00217838
CNRIP1	149.966	1.02704	0.180992	5.67453	1.39e-08	9.59e-08
PPFIA2	3.74696	1.02657	1.07255	0.957129	0.338502	0.466286
ITIH4	2.92557	1.02625	1.35938	0.754938	0.450286	0.576754
NOL6	1307.28	1.02565	0.0763732	13.4295	4.06e-41	1.78e-39
BLOC1S1	9.33319	1.02552	0.723335	1.41776	0.156261	0.254779
TMEM170B	113.883	1.02506	0.223678	4.58277	4.59e-06	2.26e-05
XRCC2	176.022	1.02331	0.164547	6.21895	5e-10	4.03e-09
COL28A1	4.81194	1.02218	1.18808	0.860357	0.389592	0.517176
SDR42E1	39.3313	1.0221	0.375825	2.71963	0.00653551	0.0171787
ANKDD1B	17.6173	1.02199	0.529429	1.93037	0.0535613	0.105912
TMEM272	40.0497	1.02162	0.36805	2.77575	0.00550742	0.0147719
ZNF20	4.34659	1.02132	1.0595	0.963963	0.335064	0.46282
ADAMTS12	3374.97	1.02116	0.0776783	13.146	1.79e-39	7.37e-38
IGFALS	3.18256	1.02099	1.25047	0.816481	0.414225	0.541931
MPZ	24.7857	1.02011	0.451553	2.2591	0.0238769	0.0534664
SMIM10	38.7117	1.02005	0.368304	2.76958	0.00561291	0.0150069
MYH3	78.6043	1.01971	0.243953	4.17994	2.92e-05	0.000126916
UHRF1	817.692	1.01894	0.100006	10.1888	2.23e-24	4.85e-23
SLC41A2	134.272	1.0185	0.187423	5.43422	5.5e-08	3.55e-07
ADAMTS8	11.8468	1.01812	0.599349	1.6987	0.0893755	0.162419
SOCS6	1242.88	1.01797	0.0907126	11.2219	3.18e-29	8.82e-28
SCN2A	110.025	1.01774	0.224062	4.54223	5.57e-06	2.71e-05
EMILIN2	1214.98	1.0176	0.0795676	12.7891	1.89e-37	7.17e-36
BST1	681.132	1.01657	0.0967361	10.5087	7.88e-26	1.86e-24
DIO1	3.78804	1.01623	1.13961	0.891739	0.372533	0.500861
JAK2	843.304	1.01577	0.0949504	10.698	1.04e-26	2.53e-25
SIPA1L1	852.002	1.0136	0.0858698	11.8039	3.73e-32	1.18e-30
ASPG	231.026	1.01322	0.191334	5.29555	1.19e-07	7.37e-07
AC010325.1	4.61452	1.01283	0.95355	1.06217	0.288159	0.411685
IFIT3	39.9844	1.01108	0.342201	2.95463	0.00313039	0.00893563
TIGAR	494.614	1.01094	0.104483	9.67565	3.83e-22	7.49e-21
CYP26B1	16.4358	1.01015	0.529916	1.90625	0.0566181	0.11081
PRKG1	122.101	1.00909	0.192338	5.24643	1.55e-07	9.44e-07
CMPK2	10.3782	1.00897	0.75529	1.33587	0.181591	0.28732
BHMT	4.00455	1.00896	1.06115	0.950812	0.3417	0.469749
DRD2	549.36	1.0089	0.107126	9.41786	4.6e-21	8.47e-20
NIBAN3	9.69151	1.00881	0.675554	1.49331	0.135356	0.22706
RNF151	2.42415	1.00871	1.42483	0.707949	0.478977	0.603779
LGALS1	2983.64	1.00843	0.0909592	11.0866	1.46e-28	3.89e-27
CAPN3	21.683	1.00809	0.502376	2.00664	0.0447877	0.090972
SIGLEC1	2.17128	1.0073	1.53358	0.65683	0.51129	0.633184
RBM47	383.657	1.00653	0.133086	7.56302	3.94e-14	4.62e-13
PROK2	1.93267	1.00584	1.61847	0.621476	0.534286	0.653562
SLC48A1	286.897	1.00323	0.13498	7.43242	1.07e-13	1.21e-12
GJB7	4.62886	1.00202	1.17706	0.851292	0.394607	0.52232
IL7	31.2308	1.0017	0.381957	2.62254	0.00872775	0.022145
CDC42EP1	783.691	1.00147	0.0955585	10.4802	1.07e-25	2.49e-24
SLC28A3	3.98367	1.0011	1.07644	0.930011	0.352365	0.480748
TSC22D1	3272.43	1.0007	0.0616367	16.2354	2.83e-59	2.1e-57
NHSL1	402.024	1.00047	0.114553	8.73371	2.46e-18	3.91e-17
PCP4L1	5.84687	0.998607	0.982568	1.01632	0.309476	0.435784
MUC1	74.6065	0.998577	0.245574	4.0663	4.78e-05	0.000200678
EBF1	24.1114	0.998454	0.427883	2.33347	0.0196232	0.0450424
GPR135	175.906	0.99818	0.18406	5.42311	5.86e-08	3.77e-07
PSAT1	4615.34	0.997171	0.0564912	17.6518	9.86e-70	9.48e-68
GRK1	2.16315	0.996934	1.44493	0.689952	0.490225	0.614016
ALDH3B1	183.6	0.996235	0.211913	4.70116	2.59e-06	1.33e-05
AMIGO1	104.079	0.995992	0.210734	4.72631	2.29e-06	1.19e-05
IGFBP7	1128.56	0.995498	0.0985288	10.1036	5.32e-24	1.13e-22
UNC13A	57.5823	0.994488	0.296164	3.3579	0.000785383	0.00256427
KRT18	15075.8	0.99283	0.0734586	13.5155	1.27e-41	5.67e-40
MYLK4	34.9081	0.99247	0.388183	2.5567	0.0105669	0.0262554
CLCA2	7.42634	0.992085	0.881487	1.12547	0.260391	0.381426
PDXP	24.0383	0.991289	0.47724	2.07713	0.0377897	0.0787552
PRELID2	86.6159	0.991288	0.239715	4.13528	3.55e-05	0.000152225
CHD5	16.096	0.991056	0.569224	1.74107	0.0816721	0.150706
ATXN7L2	387.085	0.990934	0.13958	7.09937	1.25e-12	1.28e-11
CYP2W1	12.1623	0.988544	0.677541	1.45902	0.14456	0.239407
PPIF	748.604	0.988476	0.090689	10.8996	1.16e-27	2.98e-26
TAC3	156.391	0.987307	0.180331	5.47496	4.38e-08	2.86e-07
MARCHF3	480.409	0.986134	0.118932	8.29161	1.12e-16	1.61e-15
ACTN1	12378.9	0.986018	0.0747525	13.1904	9.96e-40	4.16e-38
ATP8B1	44.8524	0.985914	0.317796	3.10235	0.00191994	0.00573258
SPDYE5	57.7175	0.985878	0.284594	3.46416	0.000531884	0.00181379
MATN2	4256.18	0.985158	0.0591812	16.6465	3.21e-62	2.54e-60
MXRA5	6706.17	0.985158	0.0639339	15.409	1.42e-53	8.98e-52
ARID5B	1893.47	0.984956	0.0702597	14.0188	1.2e-44	5.77e-43
SFRP4	28.4464	0.984886	0.411509	2.39335	0.0166953	0.0391644
CCDC168	5.99537	0.983638	0.842961	1.16688	0.243257	0.361634
HS6ST1	503.885	0.983338	0.110616	8.88968	6.13e-19	1.01e-17
FMO2	2.13704	0.983034	1.48739	0.660912	0.508669	0.631235
SLC5A4	2.96937	0.982489	1.23951	0.792643	0.427986	0.555408
G0S2	7.15926	0.982289	0.815147	1.20505	0.228186	0.343392
ST3GAL1	2123.95	0.981568	0.0817475	12.0073	3.25e-33	1.07e-31
ACTN2	185.667	0.981562	0.163295	6.01095	1.84e-09	1.41e-08
SLC38A11	3.78021	0.981251	1.16472	0.842478	0.399521	0.527121
SHE	4.91067	0.978601	0.937083	1.04431	0.296344	0.420925
PCK2	1167.41	0.978404	0.0860664	11.368	6.03e-30	1.73e-28
LAMC2	593.45	0.978191	0.13605	7.18992	6.48e-13	6.83e-12
FNDC10	134.723	0.978082	0.19549	5.00323	5.64e-07	3.19e-06
STS	251.447	0.977981	0.160133	6.10733	1.01e-09	7.92e-09
SYNE3	91.5487	0.977069	0.223327	4.37506	1.21e-05	5.59e-05
PEAK1	1963.22	0.975901	0.102325	9.53726	1.47e-21	2.77e-20
GHRHR	4.30059	0.975834	1.23931	0.787401	0.431047	0.558497
C1S	1660.3	0.975641	0.0732134	13.326	1.63e-40	7.01e-39
SVOPL	20.2047	0.975357	0.502448	1.94121	0.0522327	0.103693
MLKL	64.3291	0.973883	0.265026	3.67466	0.000238165	0.000875426
FOXL1	36.1356	0.973695	0.393272	2.47588	0.0132908	0.0321814
FLRT1	16.0895	0.973605	0.534843	1.82036	0.0687047	0.130441
FGFR2	4549.25	0.973554	0.0871145	11.1756	5.37e-29	1.47e-27
SYNDIG1	29.3535	0.973301	0.403527	2.41198	0.015866	0.0375242
LTBR	322.261	0.973299	0.14572	6.67923	2.4e-11	2.18e-10
IFITM5	2.18385	0.973293	1.44205	0.674936	0.499716	0.622607
RAB11FIP1	1315.68	0.973181	0.0911631	10.6752	1.33e-26	3.22e-25
ECHDC2	506.664	0.973073	0.107243	9.07351	1.15e-19	1.99e-18
FRMD7	3.20499	0.972999	1.28544	0.756938	0.449087	0.575977
PAPSS2	2060.78	0.972899	0.0661884	14.6989	6.55e-49	3.63e-47
URB1	638.363	0.972434	0.0963091	10.097	5.7e-24	1.21e-22
ROR1	754.145	0.972398	0.0940301	10.3414	4.58e-25	1.04e-23
HOXC8	113.581	0.972333	0.222401	4.37197	1.23e-05	5.66e-05
ACTN4	9715.37	0.97107	0.0568194	17.0905	1.75e-65	1.51e-63
FICD	115.295	0.970829	0.20071	4.83697	1.32e-06	7.1e-06
LCN12	16.6031	0.970597	0.510885	1.89984	0.0574547	0.112215
CUX1	3227.97	0.969846	0.0798476	12.1462	6.01e-34	2.03e-32
AC004922.1	2.75565	0.969769	1.26525	0.766465	0.4434	0.570514
AC008687.4	3.24706	0.969749	1.26125	0.76888	0.441965	0.569051
MINDY4	10.3053	0.96954	0.678467	1.42902	0.153	0.250691
CFD	20.3281	0.969302	0.483396	2.00519	0.0449426	0.0912087
STPG4	4.06091	0.968129	1.04746	0.924267	0.355347	0.483841
TMC3	8.51596	0.967917	0.743245	1.30228	0.192819	0.301381
AC098650.1	4.09904	0.966393	1.02042	0.947055	0.343611	0.471447
FOLH1	13.5593	0.966387	0.601398	1.6069	0.108077	0.189783
RAB7B	150.432	0.965686	0.188098	5.13395	2.84e-07	1.67e-06
CCL5	3.40375	0.965574	1.40886	0.685361	0.493116	0.616653
CD200	153.524	0.964954	0.176828	5.45701	4.84e-08	3.15e-07
THBS1	5514.02	0.964834	0.0596091	16.186	6.33e-59	4.67e-57
CDC42BPA	1771.15	0.964654	0.0809497	11.9167	9.69e-33	3.14e-31
GALNT10	1449.95	0.964141	0.0860223	11.208	3.72e-29	1.03e-27
TRAF1	116.319	0.963259	0.209071	4.60733	4.08e-06	2.03e-05
ANO3	6.78996	0.962341	0.814868	1.18098	0.237612	0.35497
NDST2	3.27416	0.96156	1.19592	0.804031	0.421379	0.548663
RGCC	114.05	0.960983	0.215194	4.46566	7.98e-06	3.79e-05
CBR1	142.185	0.960877	0.19499	4.92783	8.31e-07	4.59e-06
CCL26	10.2022	0.960401	0.676851	1.41893	0.155921	0.254401
BDH1	69.0702	0.959384	0.267918	3.58089	0.000342421	0.0012181
SCIN	16.9135	0.959316	0.504564	1.90128	0.0572655	0.111915
GMDS	120.311	0.959106	0.199455	4.80862	1.52e-06	8.11e-06
STAT3	3011.69	0.958673	0.062388	15.3663	2.75e-53	1.72e-51
RAB27A	365.646	0.958501	0.132273	7.24636	4.28e-13	4.59e-12
CCND3	1068.64	0.957179	0.0940359	10.1789	2.46e-24	5.35e-23
C2CD6	5.80454	0.956141	0.880113	1.08638	0.277309	0.400038
CYP2A13	10.2148	0.955348	0.684836	1.395	0.163015	0.263909
COLQ	79.5983	0.955341	0.242712	3.93611	8.28e-05	0.000333001
PER2	66.1683	0.954063	0.276162	3.45472	0.000550867	0.00187156
RAB6B	234.25	0.953998	0.146777	6.49963	8.05e-11	7e-10
GCK	21.7003	0.95326	0.448057	2.12754	0.0333751	0.0709311
CLIP4	679.007	0.95276	0.101733	9.36533	7.58e-21	1.38e-19
DNAJB13	6.02339	0.951622	0.864833	1.10035	0.271178	0.393658
SBSN	8.51031	0.951281	0.718597	1.3238	0.185569	0.292426
ETV6	444.766	0.950526	0.124888	7.611	2.72e-14	3.22e-13
MINDY2	1347.57	0.950428	0.0833487	11.403	4.04e-30	1.17e-28
ZNF442	38.2594	0.948563	0.348805	2.71947	0.00653871	0.0171843
GLI1	41.6839	0.947541	0.335243	2.82643	0.00470702	0.0128519
NR2C2AP	56.1319	0.946844	0.305806	3.09622	0.00196005	0.00584226
GPR45	3.57684	0.94628	1.07451	0.880664	0.3785	0.506466
RAPSN	8.19795	0.944693	0.764621	1.2355	0.216643	0.330116
PLP2	498.608	0.94455	0.105367	8.96439	3.12e-19	5.23e-18
NSMCE1	110.808	0.944363	0.218253	4.32691	1.51e-05	6.87e-05
LHFPL4	3.52011	0.944346	1.13987	0.82847	0.407404	0.534984
ZNF92	349.212	0.944235	0.120938	7.80762	5.83e-15	7.32e-14
TERB1	1.96138	0.944197	1.61242	0.585576	0.55816	0.674906
GDF6	1370.67	0.944067	0.077728	12.1458	6.04e-34	2.04e-32
SYNPO2L	24.1148	0.943973	0.423566	2.22863	0.0258384	0.0571845
DUOX1	36.966	0.943814	0.38957	2.42271	0.0154052	0.0365622
CALD1	26770.1	0.943257	0.0567162	16.6312	4.14e-62	3.26e-60
ZNF439	25.0439	0.9432	0.42385	2.22532	0.0260599	0.057593
IL32	162.325	0.943064	0.179337	5.25862	1.45e-07	8.89e-07
STIMATE	3.85173	0.942638	1.16361	0.810101	0.417882	0.545615
SEC14L5	4.3849	0.94175	1.07845	0.873245	0.382529	0.510367
JAM2	524.542	0.941594	0.101962	9.23471	2.59e-20	4.6e-19
HSD17B1	5.85537	0.940815	0.878907	1.07044	0.284423	0.407619
ZNF469	1062.15	0.940318	0.109187	8.612	7.18e-18	1.12e-16
SHOX2	16.1559	0.939218	0.54705	1.71688	0.0860014	0.157501
LMBRD2	542.838	0.938372	0.112699	8.32633	8.34e-17	1.21e-15
ANKRD31	2.75658	0.937222	1.3257	0.706965	0.479588	0.604275
COL21A1	1581.43	0.93698	0.0951493	9.84746	7.03e-23	1.42e-21
IL1RAPL2	1.65531	0.936969	1.726	0.542855	0.58723	0.700215
ERICH6B	9.40443	0.93659	0.685604	1.36608	0.171914	0.275197
SPDYE10P	3.03504	0.936047	1.17869	0.794144	0.427112	0.554597
MAST4	532.943	0.935745	0.103062	9.07944	1.09e-19	1.88e-18
GRK5	394.485	0.93315	0.136244	6.84911	7.43e-12	7.13e-11
SYTL3	37.2703	0.932765	0.356912	2.61343	0.00896383	0.0226812
LASP1	7731.8	0.932178	0.0597183	15.6096	6.26e-55	4.2e-53
TAC4	4.8837	0.932079	1.05588	0.882751	0.377371	0.505259
KAT2B	534.831	0.932007	0.103937	8.967	3.05e-19	5.12e-18
MAP6	127.061	0.931332	0.197765	4.70929	2.49e-06	1.28e-05
RHOB	2139.21	0.931328	0.0721747	12.9038	4.28e-38	1.66e-36
HIRIP3	200.064	0.931236	0.155741	5.97939	2.24e-09	1.69e-08
SPEG	2308.31	0.930483	0.0726657	12.805	1.54e-37	5.87e-36
GOLGA7	357.005	0.929977	0.135664	6.855	7.13e-12	6.85e-11
CPED1	157.387	0.92966	0.173919	5.34537	9.02e-08	5.68e-07
LOXL4	2259.72	0.929114	0.0672196	13.8221	1.88e-43	8.7e-42
SAMHD1	191.845	0.929002	0.161899	5.73816	9.57e-09	6.74e-08
DSC3	2112.2	0.928206	0.0723296	12.833	1.07e-37	4.11e-36
FGD6	1260.46	0.928003	0.0910733	10.1896	2.21e-24	4.82e-23
P2RX6	108.47	0.927733	0.215632	4.30239	1.69e-05	7.62e-05
CHSY3	765.809	0.926972	0.097374	9.51971	1.74e-21	3.26e-20
ITPRIPL1	13.3535	0.926833	0.606822	1.52736	0.126673	0.215367
RSU1	1588.15	0.92667	0.0795181	11.6536	2.2e-31	6.7e-30
PKDCC	3106.11	0.926597	0.223266	4.15019	3.32e-05	0.000143357
TMEM154	71.7919	0.926509	0.249095	3.71951	0.000199613	0.000744082
AC009690.1	6.42588	0.925152	0.897216	1.03114	0.302477	0.427941
CD248	729.407	0.92446	0.10879	8.49764	1.93e-17	2.92e-16
BICC1	122.709	0.924159	0.19608	4.71316	2.44e-06	1.26e-05
C19orf71	31.2122	0.923924	0.410586	2.25026	0.0244326	0.0545616
ITGB2	13.048	0.923297	0.598876	1.54172	0.123142	0.210819
FSTL3	1613.83	0.922966	0.0833976	11.0671	1.81e-28	4.82e-27
SYDE2	217.658	0.922795	0.161498	5.71397	1.1e-08	7.73e-08
CDC6	423.986	0.922778	0.115027	8.02224	1.04e-15	1.39e-14
SLITRK5	118.749	0.921925	0.19811	4.65361	3.26e-06	1.65e-05
IFNAR2	2.73761	0.921566	1.35836	0.678438	0.497494	0.620831
TAPBPL	45.6199	0.920473	0.335825	2.74093	0.00612661	0.0162182
GXYLT2	384.726	0.919152	0.127609	7.20287	5.9e-13	6.23e-12
TPM1	17036.1	0.919016	0.067863	13.5422	8.81e-42	3.98e-40
FAR2	128.521	0.918996	0.197913	4.64345	3.43e-06	1.73e-05
C11orf94	2.20967	0.918697	1.37549	0.667904	0.504195	0.627183
SNTB2	934.429	0.917933	0.0843826	10.8782	1.46e-27	3.76e-26
SLITRK3	3.84872	0.916726	1.049	0.873907	0.382169	0.510061
TMPRSS9	65.1906	0.915098	0.262536	3.4856	0.000491029	0.00168889
SLC18A2	4.56065	0.914835	1.1574	0.790426	0.429279	0.556691
DSCC1	108.884	0.914794	0.221512	4.12978	3.63e-05	0.00015553
HPSE	19.6586	0.913836	0.478034	1.91165	0.0559206	0.1097
NEMP2	78.565	0.913687	0.276597	3.30331	0.000955491	0.00306316
EDDM13	13.1529	0.910978	0.6748	1.35	0.177017	0.281543
STARD5	28.4289	0.910086	0.411737	2.21036	0.0270804	0.0594685
COL4A1	102947	0.910083	0.0587877	15.4808	4.67e-54	3.03e-52
ZNF132	84.5798	0.909065	0.234481	3.87693	0.000105784	0.000415505
MB21D2	246.993	0.908048	0.145615	6.23595	4.49e-10	3.63e-09
IGSF6	14.3933	0.907584	0.59257	1.53161	0.125619	0.214048
CDHR2	8.76738	0.907414	0.72855	1.24551	0.212945	0.326162
INHA	54.2817	0.907052	0.304654	2.97732	0.00290776	0.00835901
GCNT7	14.7709	0.907031	0.587085	1.54497	0.122353	0.209813
DAAM2	324.737	0.9069	0.129094	7.02513	2.14e-12	2.15e-11
DTL	254.634	0.905782	0.144703	6.2596	3.86e-10	3.14e-09
COL5A1	56115.6	0.904511	0.0607571	14.8873	3.98e-50	2.27e-48
FAM209A	1.6749	0.903383	1.70079	0.531157	0.59531	0.706659
ZBED3	206.796	0.903323	0.154916	5.83106	5.51e-09	3.97e-08
TUBB4A	23.936	0.903318	0.468073	1.92986	0.0536237	0.106022
FAM102A	834.724	0.902868	0.0903118	9.99723	1.57e-23	3.25e-22
CDH17	3.86782	0.902841	1.13647	0.794427	0.426947	0.554476
CUEDC1	574.987	0.902603	0.103099	8.75471	2.05e-18	3.28e-17
TFEB	62.4138	0.902322	0.271232	3.32676	0.000878624	0.00283835
BTBD18	5.30638	0.901788	0.891244	1.01183	0.311619	0.437862
MTF1	365.789	0.899877	0.119509	7.52978	5.08e-14	5.89e-13
AUNIP	59.0837	0.899091	0.313292	2.86982	0.00410704	0.0113712
SDC2	2227.37	0.899035	0.0776306	11.5809	5.15e-31	1.54e-29
TLN2	925.79	0.899018	0.0886332	10.1431	3.56e-24	7.64e-23
XKR7	2.50471	0.898245	1.32141	0.679763	0.496654	0.620044
RBL1	190.67	0.897665	0.165468	5.42502	5.79e-08	3.73e-07
ADAMTSL2	107.524	0.896504	0.22348	4.01157	6.03e-05	0.000248371
PARP9	250.527	0.896181	0.149793	5.9828	2.19e-09	1.65e-08
KBTBD11	144.322	0.896148	0.178319	5.02553	5.02e-07	2.86e-06
TMEM74	66.4691	0.895246	0.264656	3.38268	0.000717826	0.00237053
BRCA2	207.88	0.894806	0.178761	5.00561	5.57e-07	3.15e-06
XPO6	2052.16	0.894038	0.0684388	13.0633	5.34e-39	2.14e-37
SPCS3	6362.42	0.893834	0.0531447	16.8189	1.77e-63	1.45e-61
BRIP1	340.586	0.893557	0.127057	7.03272	2.03e-12	2.05e-11
ESCO2	123.044	0.893485	0.218226	4.0943	4.23e-05	0.000179347
IGSF5	10.628	0.8931	0.697202	1.28098	0.200202	0.310417
FN1	380467	0.891832	0.0610698	14.6035	2.67e-48	1.45e-46
STOX2	291.525	0.891647	0.147471	6.04624	1.48e-09	1.14e-08
TNNC1	214.436	0.891479	0.155624	5.72843	1.01e-08	7.12e-08
RTL8B	226.796	0.891144	0.152369	5.8486	4.96e-09	3.59e-08
STEAP3	46.7354	0.891011	0.320278	2.78199	0.00540264	0.0145296
FANCA	280.335	0.889812	0.139306	6.38749	1.69e-10	1.42e-09
BRI3BP	148.295	0.889375	0.179633	4.95105	7.38e-07	4.11e-06
TUBE1	513.626	0.8891	0.113555	7.82969	4.89e-15	6.21e-14
EMP2	686.362	0.888299	0.131479	6.75622	1.42e-11	1.32e-10
ADGRG5	1.65802	0.888106	1.60858	0.552107	0.580875	0.694286
RAD51	181.053	0.887466	0.177729	4.99337	5.93e-07	3.35e-06
ACSL1	283.185	0.887272	0.141511	6.26996	3.61e-10	2.94e-09
RIPK3	5.61697	0.887226	0.9993	0.887847	0.374623	0.502531
SPDYE2B	13.9399	0.886509	0.63311	1.40024	0.16144	0.261736
HPX	73.0538	0.885615	0.249081	3.55553	0.000377214	0.00133244
CCND2	5358.78	0.885527	0.0549611	16.1119	2.1e-58	1.53e-56
DAAM1	1357.88	0.883586	0.0783745	11.2739	1.77e-29	4.98e-28
MSRB3	2283.84	0.882682	0.0668353	13.2068	8.01e-40	3.35e-38
GNPNAT1	493.742	0.882471	0.110733	7.96932	1.6e-15	2.11e-14
FO681492.1	133.615	0.882368	0.189805	4.64881	3.34e-06	1.69e-05
DCLRE1C	216.483	0.8823	0.149733	5.89249	3.8e-09	2.8e-08
KLHL34	1.70311	0.882256	1.62502	0.542919	0.587186	0.700215
PPP4R4	9.79933	0.881715	0.667451	1.32102	0.186495	0.293635
ELF4	500.637	0.881702	0.121	7.28682	3.17e-13	3.43e-12
LIMA1	3636.75	0.881555	0.0843641	10.4494	1.47e-25	3.43e-24
FERMT2	4307.62	0.880214	0.0774109	11.3707	5.85e-30	1.68e-28
AMH	60.1011	0.880068	0.272527	3.22928	0.00124101	0.0038779
SP140L	137.593	0.879716	0.218196	4.03178	5.54e-05	0.000229286
LHX4	79.5473	0.878864	0.250781	3.50451	0.000457443	0.00158598
RAB11FIP5	1034.15	0.878759	0.0924375	9.50652	1.97e-21	3.69e-20
C9orf24	4.72332	0.878564	0.972903	0.903034	0.366508	0.495013
PROX2	26.3302	0.878313	0.421018	2.08616	0.0369638	0.0772821
SLC7A6	525.339	0.878132	0.104009	8.44285	3.1e-17	4.61e-16
MYBBP1A	1163.84	0.877314	0.0798635	10.9852	4.5e-28	1.18e-26
FLNB	19809	0.876663	0.0644458	13.6031	3.84e-42	1.74e-40
MAP1A	3388.32	0.876511	0.0749155	11.7	1.27e-31	3.92e-30
RFTN1	462.324	0.8758	0.115235	7.60014	2.96e-14	3.5e-13
MTHFD1	538.333	0.875447	0.114986	7.61353	2.67e-14	3.17e-13
TEX38	3.0677	0.875415	1.15631	0.757073	0.449006	0.57592
ATOH8	73.1794	0.875054	0.262163	3.33783	0.00084436	0.00273902
RNF212	29.9612	0.874909	0.490278	1.78452	0.0743399	0.139289
RIOX2	344.444	0.874732	0.121245	7.21461	5.41e-13	5.74e-12
ARG2	133.32	0.874073	0.20079	4.35316	1.34e-05	6.14e-05
COA7	328.987	0.8738	0.134877	6.47851	9.26e-11	8e-10
CXCR6	5.588	0.873349	0.86269	1.01236	0.311368	0.437579
ISM2	69.8387	0.871532	0.264885	3.29023	0.00100105	0.00319474
ACSBG1	6.44381	0.870735	0.803465	1.08373	0.278487	0.401254
FARP1	1371.15	0.870656	0.0785726	11.0809	1.55e-28	4.13e-27
OPN3	27.7934	0.870607	0.419815	2.07379	0.0380991	0.0793257
EFNB2	1740.05	0.869922	0.0750727	11.5877	4.76e-31	1.43e-29
NEFH	131.957	0.869583	0.189139	4.59759	4.27e-06	2.12e-05
SPATA46	44.915	0.869296	0.335857	2.5883	0.00964521	0.0242399
COMMD1	435.262	0.868674	0.119059	7.29617	2.96e-13	3.22e-12
CNTN4	192.354	0.867999	0.168695	5.14537	2.67e-07	1.58e-06
FAM110C	16.7389	0.867415	0.503832	1.72163	0.0851358	0.156228
AC118553.2	4.14297	0.86716	1.0261	0.845106	0.398052	0.525717
GRIN3A	8.35987	0.867073	0.753983	1.14999	0.250148	0.369622
TMEM63C	370.891	0.867033	0.138305	6.26899	3.63e-10	2.96e-09
TXLNA	1861.82	0.867004	0.069892	12.4049	2.46e-35	8.6e-34
MPP5	1876.84	0.866909	0.0820728	10.5627	4.44e-26	1.06e-24
EGFR	1048.41	0.866105	0.0995415	8.70094	3.29e-18	5.18e-17
ADAP2	6.25269	0.863942	0.864261	0.999631	0.317489	0.443778
DNAH3	4.17821	0.863804	1.07808	0.80124	0.422993	0.550396
SPRYD3	542.338	0.863772	0.100613	8.58507	9.08e-18	1.4e-16
CAMK2N2	8.25145	0.863709	0.758916	1.13808	0.255086	0.375205
TAFA4	2.50404	0.863019	1.35375	0.637501	0.523798	0.644414
CDK18	281.504	0.862434	0.159781	5.39761	6.75e-08	4.32e-07
TRAF5	888.88	0.86187	0.0828228	10.4062	2.32e-25	5.35e-24
PARG	1373.23	0.861628	0.0749145	11.5015	1.3e-30	3.82e-29
GBP3	223.368	0.861233	0.154181	5.58587	2.33e-08	1.57e-07
DOK3	71.6701	0.861143	0.264361	3.25745	0.00112417	0.00354483
TYMP	24.5931	0.86069	0.428079	2.01059	0.0443693	0.0902805
ASCL5	5.36664	0.860365	0.912497	0.942869	0.345748	0.47367
BCAP29	14.8589	0.859871	0.556082	1.5463	0.122031	0.209377
ZNF485	26.2906	0.859099	0.408907	2.10096	0.0356443	0.0749155
RNF128	55.2163	0.857931	0.298812	2.87114	0.00408995	0.0113282
RUBCN	187.559	0.857851	0.165691	5.17742	2.25e-07	1.34e-06
GPT	32.1455	0.857144	0.400686	2.13919	0.0324201	0.0692227
MAGI1	928.767	0.857101	0.0990396	8.65412	4.97e-18	7.77e-17
BRCA1	312.099	0.856953	0.139977	6.12208	9.24e-10	7.26e-09
GABBR2	2.49067	0.856285	1.30407	0.656625	0.511422	0.633189
IDI2	2.22102	0.856128	1.43301	0.597432	0.550219	0.668313
FYB2	52.0419	0.855757	0.297834	2.87327	0.00406251	0.0112659
FGF2	261.859	0.855669	0.150752	5.676	1.38e-08	9.52e-08
MYH10	8291.77	0.855355	0.0650413	13.1509	1.68e-39	6.94e-38
KLHL31	134.633	0.855185	0.200482	4.26564	1.99e-05	8.89e-05
ASF1B	153.626	0.854419	0.186616	4.5785	4.68e-06	2.3e-05
GOLGA8N	24.6364	0.854261	0.415327	2.05684	0.0397017	0.0820917
TAP1	173.51	0.854178	0.170367	5.01375	5.34e-07	3.03e-06
HPRT1	281.62	0.854156	0.142596	5.99003	2.1e-09	1.59e-08
FMN2	65.5488	0.853439	0.260383	3.27763	0.00104684	0.00332317
EXT1	9562.03	0.852724	0.0655952	12.9998	1.23e-38	4.85e-37
P2RY6	10.6762	0.852137	0.653374	1.30421	0.192162	0.300535
ZNF324B	71.7168	0.851763	0.250087	3.40587	0.000659538	0.00219808
FBN1	16798.4	0.851711	0.0783606	10.8691	1.62e-27	4.14e-26
LDHA	6998.79	0.851576	0.0577221	14.753	2.94e-49	1.65e-47
TPMT	563.652	0.851041	0.110516	7.70061	1.35e-14	1.64e-13
HFE	155.307	0.850869	0.177442	4.79519	1.63e-06	8.62e-06
INSL6	6.19929	0.850425	0.857298	0.991983	0.321206	0.447527
HRCT1	10.6183	0.850089	0.636738	1.33507	0.181854	0.287591
BCL2L2-PABPN1	13.7783	0.849856	0.571614	1.48677	0.137077	0.229502
TNFRSF1A	2276.73	0.849034	0.0664584	12.7754	2.25e-37	8.52e-36
DHX37	346.308	0.848793	0.139744	6.07392	1.25e-09	9.67e-09
CPLANE2	73.0052	0.84862	0.247384	3.43038	0.00060273	0.00202785
DCAF4	148.833	0.848573	0.180564	4.69958	2.61e-06	1.34e-05
KCNMB3	44.6676	0.84818	0.328295	2.58359	0.00977775	0.024537
CNN2	6262.08	0.84811	0.0633464	13.3884	7.06e-41	3.08e-39
FRRS1	129.716	0.847828	0.199017	4.26009	2.04e-05	9.09e-05
KLF5	581.715	0.847704	0.108267	7.82975	4.89e-15	6.21e-14
SOX10	4.45932	0.847527	0.988854	0.85708	0.391401	0.518957
DTD2	89.2911	0.847264	0.224209	3.7789	0.000157522	0.000598937
CTNNA2	14.7711	0.847223	0.561115	1.50989	0.131071	0.221208
RFESD	9.99966	0.846378	0.678574	1.24729	0.212291	0.325448
SLC30A1	668.082	0.846219	0.0948379	8.9228	4.55e-19	7.57e-18
NYAP2	2.52652	0.845998	1.26597	0.668258	0.503969	0.627052
ARTN	5.60265	0.845265	0.941318	0.897959	0.369207	0.497404
CRHR2	17.1598	0.844455	0.505948	1.66906	0.0951064	0.1709
CCDC39	30.3566	0.844385	0.390637	2.16156	0.030652	0.0660452
ERICH2	7.32086	0.843861	0.82429	1.02374	0.305957	0.431841
ASMT	3.96269	0.843733	1.04598	0.80664	0.419874	0.547389
HCRTR1	6.90264	0.84271	0.908604	0.927478	0.353678	0.482201
SLC38A1	3993.27	0.841895	0.065998	12.7564	2.87e-37	1.08e-35
DHX58	7.03531	0.841689	0.872497	0.96469	0.3347	0.462481
ALDH5A1	252.158	0.84164	0.143891	5.84914	4.94e-09	3.58e-08
TATDN2	182.526	0.841203	0.160676	5.2354	1.65e-07	9.98e-07
LONP1	2215.92	0.840575	0.0643669	13.0591	5.64e-39	2.26e-37
ADAM20	2.0085	0.839741	1.65134	0.50852	0.611089	0.719684
OR2W3	30.2976	0.839725	0.394745	2.12726	0.0333986	0.0709522
MICAL2	1555.41	0.839558	0.112746	7.44649	9.59e-14	1.09e-12
SMARCA2	1200.71	0.838913	0.0836634	10.0272	1.16e-23	2.43e-22
ABLIM2	3.62711	0.838395	1.14275	0.733668	0.463151	0.588583
SLC22A23	95.6321	0.83832	0.232506	3.60558	0.000311454	0.00111842
PDZRN4	4.21196	0.837814	1.08976	0.768803	0.44201	0.569051
LACC1	136.035	0.837712	0.194736	4.30178	1.69e-05	7.64e-05
RFK	646.236	0.837545	0.107066	7.82269	5.17e-15	6.54e-14
INHBC	7.77532	0.83741	0.824273	1.01594	0.309659	0.435831
EEF2K	642.079	0.834965	0.0998606	8.36131	6.2e-17	9.09e-16
MYO19	577.63	0.834706	0.10247	8.14583	3.77e-16	5.18e-15
TTLL13P	2.55363	0.834009	1.25737	0.663294	0.507142	0.629693
RHD	39.0526	0.833015	0.33893	2.45778	0.0139798	0.033677
TRMT61A	238.616	0.832512	0.145863	5.70749	1.15e-08	8.01e-08
ATRNL1	392.784	0.832356	0.119257	6.97951	2.96e-12	2.95e-11
EXOC3L4	10.7531	0.831933	0.736286	1.1299	0.258517	0.379274
CLDN2	6.70326	0.831651	0.801795	1.03724	0.299625	0.424447
DCDC2B	21.9934	0.831602	0.469276	1.7721	0.0763785	0.142509
APOL2	473.745	0.831497	0.110922	7.49621	6.57e-14	7.56e-13
COL25A1	413.785	0.831296	0.153031	5.43222	5.57e-08	3.59e-07
PGM1	706.938	0.830326	0.103207	8.04528	8.6e-16	1.16e-14
RAD9B	9.28498	0.830202	0.711913	1.16616	0.243551	0.36183
SLC15A2	60.3548	0.830179	0.29113	2.85158	0.00435032	0.0119851
CASS4	5.05176	0.82977	0.930172	0.892061	0.37236	0.500728
UNC5D	310.675	0.829732	0.131721	6.29917	2.99e-10	2.46e-09
USP28	770.716	0.829711	0.0964861	8.59928	8.02e-18	1.24e-16
CCDC86	226.43	0.828962	0.157097	5.27674	1.32e-07	8.1e-07
CALB1	11.0765	0.828201	0.625078	1.32495	0.185186	0.29203
MSLN	4.18838	0.827127	1.01373	0.815925	0.414543	0.54221
PLA2G4B	2.54088	0.826279	1.25819	0.65672	0.511361	0.633184
PIGZ	85.8944	0.82618	0.233451	3.53898	0.000401672	0.00140974
SRM	942.611	0.825922	0.115938	7.12381	1.05e-12	1.09e-11
C11orf42	6.21587	0.825184	0.894013	0.923011	0.356001	0.484436
LRRD1	2.74236	0.824687	1.37938	0.597868	0.549928	0.668064
CYS1	43.6503	0.824015	0.324464	2.53962	0.0110974	0.0274508
FAM155B	14.5449	0.823769	0.593585	1.38779	0.165202	0.266617
HYKK	49.5669	0.82254	0.331691	2.47983	0.0131444	0.0318764
BRF2	204.97	0.822498	0.176239	4.66694	3.06e-06	1.55e-05
KIAA0825	33.6133	0.821876	0.397756	2.06628	0.038802	0.0806059
GDAP1	276.126	0.821761	0.146864	5.59537	2.2e-08	1.49e-07
SIK2	677.381	0.821619	0.097053	8.46568	2.55e-17	3.81e-16
NPIPB9	5.33294	0.821468	0.897074	0.91572	0.359814	0.488344
INKA2	445.167	0.821343	0.12716	6.45913	1.05e-10	9.01e-10
KCTD19	14.9857	0.821067	0.552479	1.48615	0.137239	0.22975
GPR157	107.508	0.820649	0.228312	3.59442	0.000325117	0.00116319
AOX1	18.1341	0.819695	0.526675	1.55636	0.119623	0.206153
GPD1	5.10585	0.819618	0.940895	0.871106	0.383697	0.511332
MPND	44.1572	0.81925	0.342472	2.39216	0.0167493	0.0392676
ST7	371.718	0.818047	0.121399	6.7385	1.6e-11	1.49e-10
PRKCB	64.5199	0.818015	0.304939	2.68255	0.00730627	0.0189552
MYLPF	1.98934	0.8166	1.57636	0.518028	0.604439	0.714608
FAM167A	24.7572	0.816397	0.424853	1.9216	0.0546565	0.107627
OR2L3	1.68556	0.816016	1.65876	0.491944	0.622759	0.729072
SERTAD4	35.8526	0.815921	0.356872	2.28631	0.0222359	0.0502178
CERCAM	2148.17	0.81411	0.0716808	11.3574	6.81e-30	1.95e-28
IKBKE	284.661	0.8138	0.139515	5.83308	5.44e-09	3.93e-08
ZGLP1	7.08065	0.813631	0.837594	0.971391	0.331353	0.458915
THEM4	900.476	0.813508	0.089145	9.12567	7.13e-20	1.24e-18
MAPRE2	781.429	0.813381	0.0969514	8.38958	4.88e-17	7.18e-16
VWA5B1	5.98199	0.8131	0.845125	0.962106	0.335996	0.463655
AGTPBP1	734.506	0.812993	0.10848	7.49437	6.66e-14	7.65e-13
LY96	38.3247	0.812172	0.351497	2.31061	0.0208546	0.0474422
EMILIN1	376.06	0.812128	0.125143	6.4896	8.61e-11	7.46e-10
NTMT1	278.2	0.811844	0.146283	5.54981	2.86e-08	1.91e-07
SRXN1	7.62651	0.811282	0.837181	0.969064	0.332513	0.460112
FOXC1	23.5725	0.811228	0.426798	1.90073	0.0573375	0.112018
TRPC7	5.97386	0.811114	0.840566	0.964962	0.334564	0.462382
BCL3	419.357	0.810632	0.120927	6.7035	2.03e-11	1.86e-10
SYT15	44.6039	0.810538	0.316152	2.56376	0.0103545	0.0257893
POLDIP3	2.51588	0.810533	1.43931	0.563142	0.573338	0.687653
CFAP157	32.7696	0.809747	0.374089	2.16458	0.0304197	0.0656536
PRKD1	480.27	0.809294	0.108204	7.47935	7.47e-14	8.55e-13
ALDH1A3	1.92579	0.809211	1.66634	0.485621	0.627236	0.732716
ANKRD24	68.1852	0.809023	0.266382	3.03708	0.00238882	0.00697871
DNAJC21	1986.78	0.808962	0.0814538	9.93154	3.04e-23	6.22e-22
POPDC3	14.934	0.808876	0.640411	1.26306	0.206568	0.31865
RCAN1	305.25	0.808722	0.12941	6.2493	4.12e-10	3.34e-09
PXDNL	8.20262	0.808721	0.746082	1.08396	0.278384	0.401164
CPM	94.9452	0.808282	0.229009	3.52948	0.000416376	0.00145684
C3orf52	269.319	0.808202	0.152421	5.30243	1.14e-07	7.11e-07
FGFBP1	10.8792	0.806956	0.67666	1.19256	0.233043	0.349351
ALDOA	21.8109	0.806292	0.449324	1.79446	0.0727404	0.13672
EPSTI1	158.544	0.80582	0.18406	4.37804	1.2e-05	5.52e-05
PPDPF	1653.19	0.805744	0.0767537	10.4978	8.84e-26	2.08e-24
ITPRIPL2	577.624	0.805593	0.11048	7.29178	3.06e-13	3.31e-12
MYO5B	142.675	0.80553	0.179711	4.48238	7.38e-06	3.52e-05
DDIT4L	15.0237	0.804815	0.534911	1.50458	0.132433	0.222974
LDLRAD4	255.402	0.804094	0.137649	5.84161	5.17e-09	3.74e-08
PNPO	103.053	0.803765	0.213655	3.76197	0.000168579	0.000637553
AK5	7.86802	0.8037	0.854346	0.940719	0.346849	0.474802
PMM1	263.928	0.803605	0.139667	5.75371	8.73e-09	6.16e-08
RAI14	4574.17	0.802786	0.0604583	13.2784	3.09e-40	1.32e-38
ARHGEF2	1262.64	0.802686	0.0771647	10.4022	2.42e-25	5.57e-24
SNX10	75.9442	0.801789	0.245426	3.26693	0.0010872	0.00344218
SETDB2	413.239	0.801761	0.138342	5.79551	6.81e-09	4.85e-08
CSRP2	6843.57	0.80072	0.0802744	9.97479	1.97e-23	4.06e-22
EXOC6	93.8123	0.800573	0.219969	3.63948	0.000273193	0.000993164
XK	20.869	0.800143	0.536458	1.49153	0.135823	0.227672
FOSL2	2637.98	0.800018	0.066297	12.0672	1.57e-33	5.22e-32
PCDHAC2	314.065	0.798913	0.13589	5.87913	4.12e-09	3.02e-08
RTL6	883.472	0.798795	0.084657	9.43567	3.89e-21	7.19e-20
MICAL3	794.5	0.798702	0.110722	7.21361	5.45e-13	5.77e-12
UTP20	670.213	0.798515	0.0965999	8.26621	1.38e-16	1.97e-15
PTDSS1	983.816	0.798467	0.0831997	9.59699	8.23e-22	1.58e-20
PCSK7	811.404	0.79832	0.0938651	8.50497	1.82e-17	2.75e-16
H4C11	3.39374	0.798038	1.24056	0.643289	0.520037	0.6409
CPD	3647.52	0.797964	0.0700647	11.3889	4.75e-30	1.37e-28
CARMIL1	857.182	0.797756	0.0989908	8.05889	7.7e-16	1.04e-14
SPEGNB	2.59792	0.797731	1.37093	0.581889	0.560641	0.677042
IFRD2	426.002	0.797294	0.121242	6.57608	4.83e-11	4.27e-10
PRDM12	3.97176	0.797275	1.15057	0.692936	0.48835	0.612357
CCDC96	36.2945	0.796755	0.357317	2.22982	0.0257591	0.0570495
AGBL2	16.49	0.796271	0.543587	1.46485	0.142963	0.23734
VLDLR	1668.01	0.796087	0.0754422	10.5523	4.96e-26	1.18e-24
AP1S3	172.969	0.79532	0.172655	4.60643	4.1e-06	2.04e-05
SVIL	1653.08	0.794426	0.0909632	8.73349	2.47e-18	3.92e-17
CRYBG1	21.4467	0.794183	0.468732	1.69432	0.090204	0.163677
SLC35C1	522.851	0.794001	0.106776	7.43617	1.04e-13	1.17e-12
CYP27B1	34.8043	0.793738	0.387704	2.04728	0.0406305	0.0837674
GLTPD2	19.4729	0.793546	0.548263	1.44738	0.14779	0.243503
NTN3	28.687	0.793516	0.395472	2.0065	0.0448027	0.090984
H1-7	2.54834	0.793232	1.38007	0.574778	0.565442	0.680751
LAMA5	7118.41	0.793207	0.0725138	10.9387	7.53e-28	1.96e-26
AC004706.3	87.7895	0.792126	0.238014	3.32806	0.000874523	0.00282686
FYCO1	804.014	0.792071	0.0932695	8.49229	2.03e-17	3.06e-16
TTYH1	87.5563	0.791975	0.225134	3.51779	0.000435158	0.00151546
RNF150	352.269	0.791227	0.135358	5.84544	5.05e-09	3.66e-08
NR1D1	70.8581	0.791085	0.257532	3.0718	0.00212774	0.00629511
MSANTD1	24.8163	0.790862	0.452512	1.74771	0.0805135	0.149063
CD82	330.127	0.790839	0.138967	5.69084	1.26e-08	8.79e-08
SLC31A1	2623.77	0.78967	0.0701945	11.2497	2.32e-29	6.49e-28
MAP6D1	20.7416	0.789399	0.46198	1.70873	0.0875008	0.159716
EML4	2368.71	0.789199	0.0662886	11.9055	1.11e-32	3.58e-31
PLXDC2	429.771	0.789066	0.112527	7.01221	2.35e-12	2.36e-11
LHCGR	3.61358	0.788006	1.19802	0.657755	0.510696	0.632843
TRIM35	335.718	0.787986	0.126523	6.228	4.72e-10	3.81e-09
C4BPB	37.8801	0.787925	0.387044	2.03575	0.0417753	0.0857304
C2CD3	592.542	0.787685	0.107658	7.31653	2.54e-13	2.78e-12
ZNF793	182.833	0.787495	0.167381	4.7048	2.54e-06	1.31e-05
STAB2	17.351	0.787416	0.527106	1.49385	0.135215	0.226898
FAM162B	2.87559	0.786933	1.29158	0.609277	0.542341	0.661188
PARP16	175.515	0.786851	0.185634	4.23872	2.25e-05	9.94e-05
ASL	255.908	0.786674	0.14321	5.49315	3.95e-08	2.6e-07
TUNAR	2.83001	0.786296	1.2171	0.646039	0.518254	0.639563
NLRP1	46.4171	0.785787	0.326543	2.40638	0.0161116	0.0380299
GPHN	381.165	0.785599	0.141075	5.56868	2.57e-08	1.72e-07
TBX18	299.82	0.785598	0.13365	5.87803	4.15e-09	3.03e-08
SLC47A1	163.259	0.78557	0.172772	4.54685	5.45e-06	2.65e-05
FAM160A2	555.988	0.785364	0.098795	7.94943	1.87e-15	2.46e-14
AVPR2	1.75314	0.784912	1.67244	0.469321	0.63884	0.742374
ACTG1	65597	0.784335	0.050372	15.5708	1.15e-54	7.61e-53
ABHD15	163.974	0.783888	0.176162	4.4498	8.59e-06	4.05e-05
ARSG	131.098	0.782461	0.19036	4.11043	3.95e-05	0.000168234
RDH13	109.314	0.782306	0.204972	3.81665	0.000135278	0.000519945
CDH4	14.8182	0.781889	0.570009	1.37171	0.170153	0.272938
MAFK	437.663	0.78183	0.11149	7.01253	2.34e-12	2.35e-11
ACSM1	11.2399	0.781643	0.62984	1.24102	0.214599	0.328017
CYP2A6	43.9363	0.781611	0.338312	2.31033	0.02087	0.0474704
GALNT14	36.4119	0.781255	0.36036	2.16799	0.0301597	0.065219
TPK1	52.9555	0.780177	0.329476	2.36793	0.0178878	0.0415674
JMJD7	6.85639	0.780171	0.80778	0.965822	0.334133	0.461903
ZACN	6.30715	0.779989	0.901361	0.865346	0.386849	0.514611
RRM2	1311.71	0.77995	0.0957195	8.14828	3.69e-16	5.08e-15
RBP3	15.9169	0.779886	0.542676	1.43711	0.150687	0.247526
DCAF4L1	17.4122	0.779781	0.577212	1.35094	0.176713	0.281189
SORCS3	17.389	0.779577	0.503058	1.54968	0.121219	0.208168
SMIM10L2B	111.945	0.778979	0.227109	3.42998	0.000603621	0.00202953
KLHL21	885.284	0.778962	0.104533	7.45186	9.2e-14	1.05e-12
[truncated: 13,575 more rows]

## Sheet: S_NCvsN_NC
	baseMean	log2FoldChange	lfcSE	stat	pvalue	padj
TSPAN6	995.395	-0.251176	0.102101	-2.46008	0.0138906	0.0275574
TNMD	145.432	3.98489	0.26389	15.1005	1.60639e-51	3.77176e-50
DPM1	848.207	-0.24899	0.0958768	-2.59698	0.00940467	0.0193036
SCYL3	140	-0.38857	0.189932	-2.04583	0.0407726	0.0723383
C1orf112	202.237	-2.97107	0.207855	-14.2939	2.38713e-46	4.97336e-45
FGR	0.340176	0.289563	3.8394	0.0754186	0.939882	NA
CFH	108.189	4.17763	0.320023	13.0542	6.01576e-39	1.02997e-37
FUCA2	651.278	-0.524204	0.114701	-4.57019	4.87287e-06	1.59658e-05
GCLC	740.46	0.101702	0.10092	1.00775	0.313574	0.414224
NFYA	712.204	-0.332767	0.104107	-3.19639	0.00139157	0.00332122
STPG1	155.526	-0.156037	0.183617	-0.849795	0.395439	0.49788
NIPAL3	469.913	1.15971	0.125029	9.27559	1.76646e-20	1.54475e-19
LAS1L	1011.02	-0.431784	0.0929189	-4.64688	3.36986e-06	1.12638e-05
ENPP4	71.5276	-0.574824	0.29635	-1.93968	0.0524191	0.0904626
SEMA3F	181.911	2.21483	0.184299	12.0176	2.87251e-33	4.21613e-32
CFTR	3.80874	-1.66175	1.16118	-1.43108	0.152406	0.229101
ANKIB1	1683.41	0.118031	0.0858362	1.37508	0.169108	0.250253
CYP51A1	102.385	1.02543	0.251686	4.07424	4.61647e-05	0.000135272
KRIT1	140.878	-0.206907	0.190325	-1.08712	0.276982	0.374124
RAD52	214.414	-0.142731	0.157846	-0.904247	0.365864	0.469036
BAD	73.892	1.46076	0.410393	3.55943	0.000371662	0.000967442
LAP3	1272.39	-0.526928	0.0846499	-6.2248	4.8218e-10	2.29749e-09
CD99	5583.3	0.565854	0.101681	5.565	2.62155e-08	1.07645e-07
HS3ST1	19.1047	-2.67973	0.596631	-4.49145	7.07413e-06	2.27921e-05
AOC1	1.50194	4.17488	2.10521	1.98312	0.0473545	0.0827863
WNT16	8.35816	1.47544	0.854339	1.72699	0.0841693	0.137032
HECW1	44.9428	0.674683	0.334985	2.01407	0.0440021	0.0775345
MAD1L1	4.33852	-0.69302	1.00885	-0.68694	0.49212	0.589586
LASP1	7874.22	0.855005	0.065175	13.1186	2.5767e-39	4.47767e-38
SNX11	417.491	0.248109	0.118616	2.0917	0.0364656	0.0656138
TMEM176A	1.67293	0.898618	1.65305	0.543611	0.586709	0.675201
M6PR	1532.17	-0.139259	0.0891911	-1.56136	0.11844	0.184861
KLHL13	63.1334	-1.67495	0.289436	-5.78693	7.16859e-09	3.09528e-08
CYP26B1	25.6162	3.50759	0.57539	6.09601	1.08746e-09	5.02389e-09
ICA1	14.0057	1.0218	0.61406	1.66401	0.0961098	0.153824
DBNDD1	259.327	-1.43904	0.148051	-9.71993	2.4794e-22	2.39366e-21
ALS2	1513.94	-0.0334923	0.0975444	-0.343355	0.731332	0.798889
CASP10	0.933051	-1.92934	2.28258	-0.845247	0.397973	0.500136
CFLAR	483.518	0.785298	0.124469	6.3092	2.80476e-10	1.36198e-09
TFPI	249.102	-0.410477	0.153848	-2.66807	0.00762884	0.0159405
NDUFAF7	394.246	-0.23451	0.121129	-1.93603	0.0528636	0.0911427
RBM5	1971.7	0.491256	0.0742753	6.61398	3.74112e-11	1.94639e-10
MTMR7	45.7579	-0.264654	0.336572	-0.786323	0.431678	0.532082
SLC7A2	68.6317	-3.32516	0.350615	-9.48379	2.45212e-21	2.23958e-20
ARF5	1039.02	0.290358	0.128698	2.25613	0.0240628	0.0452514
SARM1	163.851	-0.323972	0.21151	-1.53171	0.125594	0.194421
POLDIP2	1945.88	0.021543	0.0774443	0.278174	0.780879	0.837308
PLXND1	3750.75	0.258322	0.071275	3.6243	0.000289749	0.00076488
AK2	1758.04	-0.275335	0.0791404	-3.47907	0.000503154	0.00128562
CD38	11.6437	2.17258	0.679699	3.19639	0.00139161	0.00332122
FKBP4	1616.31	-0.41285	0.0941499	-4.38503	1.15971e-05	3.64185e-05
KDM1A	3618.44	-0.490646	0.0676665	-7.25094	4.139e-13	2.45529e-12
RBM6	2363.67	0.0840851	0.0716586	1.17341	0.24063	0.334711
CAMKK1	205.01	-0.806199	0.172764	-4.66649	3.06393e-06	1.02878e-05
RECQL	824.012	-0.68299	0.118396	-5.76867	7.99001e-09	3.43807e-08
VPS50	438.683	0.0688461	0.117791	0.584477	0.5589	0.650595
HSPB6	5.62073	2.11026	1.02081	2.06723	0.0387121	0.0691126
ARHGAP33	349.859	-1.54198	0.141581	-10.8912	1.26929e-27	1.54367e-26
NDUFAB1	1087.1	-0.338212	0.0998281	-3.38794	0.000704185	0.00175916
PDK4	38.742	2.71787	0.407006	6.67771	2.42712e-11	1.27873e-10
SLC22A16	0.179041	1.25133	4.08047	0.306664	0.759099	NA
ZMYND10	17.0732	0.147107	0.569907	0.258124	0.796311	0.85032
ABCB5	6.60126	1.78927	0.879174	2.03517	0.0418336	0.0740509
ARX	0.190235	1.25133	4.08047	0.306664	0.759099	NA
SLC25A13	1720.54	0.109621	0.0838104	1.30796	0.190887	0.275864
ST7	468.963	0.900659	0.120334	7.48464	7.17458e-14	4.44425e-13
CDC27	1956.8	-0.439174	0.0908798	-4.83247	1.34846e-06	4.68559e-06
SLC4A1	0.503763	-0.689122	3.32336	-0.207357	0.835731	NA
CALCR	5.52706	0.383705	0.909977	0.421665	0.67327	0.750242
HCCS	488.038	-0.135387	0.121991	-1.1098	0.267084	0.36354
DVL2	937.277	-0.0262732	0.11483	-0.228801	0.819024	0.868352
PRSS22	0.450531	-2.15351	3.77717	-0.570138	0.568584	NA
UPF1	2100.27	-0.163628	0.0738223	-2.21651	0.0266566	0.0496238
SKAP2	566.951	-0.0308586	0.10922	-0.282537	0.777532	0.834624
SLC25A5	2497.75	-0.0325118	0.105052	-0.309483	0.756954	0.819282
MCUB	112.633	-3.08187	0.268775	-11.4664	1.94688e-30	2.60139e-29
HOXA11	0.640766	-1.19178	3.04226	-0.391742	0.695249	0.768933
POLR2J	513.651	0.121979	0.163082	0.747962	0.454483	0.553705
DHX33	835.65	-0.869949	0.114243	-7.61487	2.63967e-14	1.68326e-13
MEOX1	4.33439	0.0583644	1.01617	0.0574357	0.954198	0.967658
THSD7A	374.996	0.275041	0.160302	1.71577	0.0862036	0.139818
LIG3	620.843	-0.474804	0.104982	-4.5227	6.10544e-06	1.98046e-05
RPAP3	1022.6	-0.32792	0.111815	-2.9327	0.00336024	0.00752028
ACSM3	12.9441	2.65602	0.740368	3.58744	0.000333945	0.000874441
REXO5	54.8578	-2.69987	0.349931	-7.71544	1.20567e-14	7.82024e-14
CIAPIN1	1281.13	-0.37875	0.0848744	-4.46247	8.10189e-06	2.59286e-05
SPPL2B	813.059	0.418013	0.118498	3.52761	0.000419328	0.00108491
FAM214B	1388.08	1.36973	0.0833438	16.4347	1.07957e-60	3.05588e-59
COPZ2	185.814	2.55331	0.19404	13.1586	1.51801e-39	2.65783e-38
PRKAR2B	164.525	-1.92158	0.21531	-8.92474	4.46734e-19	3.67149e-18
MSL3	639.578	-0.22456	0.101039	-2.2225	0.0262494	0.0489499
CREBBP	1669.11	-0.335179	0.092915	-3.60737	0.000309316	0.0008131
TSPOAP1	124.345	2.45268	0.239387	10.2456	1.23799e-24	1.32683e-23
MPO	0	NA	NA	NA	NA	NA
PON1	1.10582	-2.22186	2.31559	-0.959522	0.337296	0.439274
GCFC2	241.415	-0.548611	0.162495	-3.37617	0.000735018	0.00183168
WDR54	322.448	-0.599415	0.140189	-4.27577	1.90482e-05	5.83093e-05
CROT	213.811	0.0222539	0.16356	0.13606	0.891774	0.923195
ABCB4	124.882	0.153956	0.204025	0.754592	0.450494	0.550099
KMT2E	1151.23	-0.594578	0.101181	-5.87637	4.19366e-09	1.84358e-08
RHBDD2	1219.09	0.570441	0.0850368	6.70817	1.97085e-11	1.04512e-10
SOX8	27.8421	1.90776	0.450728	4.23262	2.30982e-05	7.011e-05
IBTK	1707.77	-0.0166301	0.0910839	-0.18258	0.855128	0.896048
ZNF195	631.68	-1.68171	0.108766	-15.4617	6.29501e-54	1.55679e-52
MYCBP2	801.495	-0.0638671	0.119983	-0.532303	0.594516	0.681989
FBXL3	822.835	0.420056	0.101644	4.13263	3.58641e-05	0.000106546
ITGAL	0.340412	0.289563	3.83841	0.0754381	0.939866	NA
PDK2	334.814	0.709065	0.136638	5.18936	2.11014e-07	7.94199e-07
ITGA3	2572.8	0.548986	0.07732	7.10019	1.24588e-12	7.18096e-12
ZFX	632.262	-0.348033	0.126435	-2.75267	0.00591117	0.0126192
LAMP2	4509.75	-0.0477541	0.0730324	-0.653875	0.513192	0.609128
ITGA2B	34.9925	0.83625	0.388735	2.1512	0.03146	0.0575763
ASB4	0.580811	-2.52531	3.0793	-0.820092	0.412163	0.514231
GDE1	1199.11	0.28512	0.0839324	3.39702	0.000681241	0.00170473
REX1BD	473.684	-0.402527	0.152245	-2.64394	0.00819464	0.0170148
CRLF1	27.9434	1.23315	0.43289	2.84864	0.00439068	0.00961193
OSBPL7	299.414	-0.210756	0.134263	-1.56973	0.116478	0.182027
TMEM98	1420.68	0.228709	0.0904322	2.52907	0.0114366	0.0231064
YBX2	19.979	0.737973	0.531541	1.38836	0.165026	0.245118
KRT33A	0	NA	NA	NA	NA	NA
MAP3K14	349.553	-0.782339	0.134538	-5.81498	6.06395e-09	2.633e-08
ABCC8	0.965039	-0.722934	2.38231	-0.303459	0.76154	0.822542
CACNG3	0.362985	2.13332	4.03903	0.528177	0.597376	NA
TMEM132A	5020.18	0.259192	0.0661998	3.9153	9.02921e-05	0.000255364
AP2B1	7525.4	-0.0312508	0.0692972	-0.450967	0.652013	0.731695
TAC1	18.9742	1.20207	0.510875	2.35297	0.0186242	0.0358921
ZNF263	726.156	0.225647	0.10794	2.09049	0.0365738	0.0657648
CX3CL1	381.326	1.39729	0.125651	11.1204	9.98051e-29	1.26591e-27
SPATA20	498.984	0.68254	0.109221	6.24918	4.12608e-10	1.97527e-09
CACNA1G	102.084	-1.05609	0.226771	-4.65707	3.20742e-06	1.07496e-05
TNFRSF12A	3150.33	0.212896	0.0993172	2.14359	0.0320654	0.0585589
DLX6	1.36139	1.91401	2.12282	0.901639	0.367249	0.470402
MAP3K9	317.825	-0.268257	0.162432	-1.6515	0.0986362	0.157279
RALA	1551.3	0.0881068	0.0840621	1.04812	0.294585	0.393491
BAIAP2L1	114.513	-0.660263	0.231361	-2.85383	0.00431962	0.00946529
KDM7A	393.536	0.997712	0.138035	7.22795	4.90334e-13	2.89497e-12
ETV1	360.352	-1.28704	0.134413	-9.57526	1.01601e-21	9.49839e-21
AGK	589.078	-0.402945	0.106493	-3.78377	0.000154469	0.000423882
ALDH3B1	106.098	1.50388	0.221802	6.7803	1.1993e-11	6.44813e-11
TTC22	0	NA	NA	NA	NA	NA
PHTF2	848.641	-0.708301	0.0961414	-7.36728	1.74146e-13	1.05226e-12
CCL26	0.181493	1.25133	4.08047	0.306664	0.759099	NA
FARP2	1124.74	-0.515371	0.104723	-4.92127	8.59826e-07	3.04765e-06
USH1C	2.17022	3.65141	1.76938	2.06366	0.0390497	0.0696695
GGCT	119.134	-0.0416548	0.307614	-0.135412	0.892286	0.923548
DBF4	562.356	-2.99906	0.129715	-23.1204	2.88691e-118	1.81808e-116
TBXA2R	7.90218	0.307398	0.812936	0.378133	0.705332	0.777703
IFRD1	401.886	0.59571	0.162457	3.66688	0.00024553	0.000654746
LGALS14	0	NA	NA	NA	NA	NA
COX10	306.708	-0.307657	0.140048	-2.1968	0.0280346	0.0519451
GTF2IRD1	530.348	-0.0673811	0.112748	-0.597626	0.550089	0.642919
PAF1	1212.39	-0.245232	0.100884	-2.43084	0.0150639	0.029664
VPS41	1515.1	0.687111	0.0923064	7.44381	9.7821e-14	6.00679e-13
ARHGAP44	58.7601	-0.847627	0.297213	-2.85192	0.00434561	0.00951969
ELAC2	1544.94	-0.658483	0.0780618	-8.4354	3.30074e-17	2.47716e-16
SCIN	0.548317	2.72708	3.15144	0.865344	0.38685	0.489375
ARSD	174.221	1.52349	0.184344	8.26436	1.40444e-16	1.01917e-15
PNPLA4	156.66	0.857439	0.176929	4.84622	1.25834e-06	4.38557e-06
MYH13	0.369276	2.15448	3.6818	0.58517	0.558434	NA
ADIPOR2	1504.1	0.0250185	0.0820584	0.304887	0.760452	0.822042
CDKL3	21.2416	0.0187805	0.502746	0.0373559	0.970201	0.978528
UPP2	1.08544	3.71424	2.4961	1.48802	0.136747	0.209077
PRSS21	0	NA	NA	NA	NA	NA
MARK4	1075.23	0.775822	0.0889221	8.72474	2.66795e-18	2.10534e-17
PROM1	536.262	-0.274464	0.107302	-2.55787	0.0105316	0.0214164
CCDC124	1238.85	0.0519627	0.132215	0.393017	0.694307	0.76831
CEACAM21	2.1224	-3.30133	1.7927	-1.84155	0.0655417	0.110104
PAFAH1B1	3543.17	-0.114154	0.0688943	-1.65695	0.0975293	0.155863
NOS2	5.31174	-3.11426	1.16357	-2.67646	0.00744039	0.0155848
DNAH9	28.0662	0.346761	0.422262	0.821199	0.411533	0.513839
KIAA0100	2092.58	0.111579	0.0822209	1.35707	0.17476	0.257224
SLC13A2	0	NA	NA	NA	NA	NA
GAS7	200.59	0.244071	0.157579	1.54888	0.121411	0.188864
TRAPPC6A	138.759	1.04057	0.201507	5.16395	2.41789e-07	9.04997e-07
MATK	2.33652	0.305488	1.34073	0.227852	0.819761	0.868794
CEACAM7	0	NA	NA	NA	NA	NA
CD79B	0.150177	-0.67222	4.08047	-0.164741	0.869148	NA
SCN4A	4.67368	3.90254	1.42018	2.74792	0.00599743	0.0127899
ST7L	266.421	0.0467888	0.144796	0.323137	0.746592	0.810979
TKTL1	6.22814	-1.24855	0.957504	-1.30397	0.192245	0.277283
PAX6	102.569	1.74542	0.242517	7.19713	6.14944e-13	3.6123e-12
RPUSD1	464.308	-0.563815	0.150436	-3.74788	0.000178339	0.0004848
RHBDF1	640.721	-0.0143626	0.102849	-0.139647	0.888939	0.920964
LUC7L	1610.53	0.246273	0.0855099	2.88005	0.00397609	0.00876694
CACNA2D2	53.3382	-0.527616	0.299835	-1.75969	0.0784603	0.1289
BAIAP3	123.535	0.339604	0.2115	1.60569	0.108342	0.170957
TSR3	762.815	0.655922	0.139698	4.69527	2.66251e-06	8.98451e-06
PIGQ	717.385	0.612352	0.108709	5.63297	1.77129e-08	7.39843e-08
CRAMP1	389.224	-0.179302	0.123963	-1.44641	0.148062	0.223537
TEAD3	1453.28	1.05691	0.0829476	12.7419	3.45925e-37	5.68885e-36
SELE	0.161135	-0.67222	4.08047	-0.164741	0.869148	NA
DNAJC11	1049.13	-0.549606	0.0964789	-5.69664	1.22189e-08	5.17553e-08
FMO3	3.99143	4.57698	1.53493	2.98188	0.00286485	0.00647928
MYLIP	287.647	2.1753	0.155084	14.0266	1.07131e-44	2.08963e-43
NOX1	7.97709	-0.251347	0.75641	-0.33229	0.73967	0.805075
E2F2	58.6484	-4.15114	0.4359	-9.52316	1.67989e-21	1.55173e-20
PSMB1	2747.34	-0.105593	0.0707784	-1.49188	0.13573	0.207737
SYN1	18.6697	0.745728	0.528557	1.41088	0.158281	0.236331
JARID2	809.77	-0.652085	0.0962167	-6.77726	1.22479e-11	6.58082e-11
CDKL5	317.561	0.178731	0.147443	1.2122	0.225434	0.317103
CAMK1G	5.0023	-2.55435	1.19718	-2.13364	0.0328726	0.059885
CDK11A	4.78056	-0.463599	1.01405	-0.457176	0.647544	0.727816
NADK	1500.35	-0.0628568	0.0781717	-0.804086	0.421347	0.522839
TFAP2B	2.7921	-1.4438	1.52346	-0.947711	0.343277	0.445848
TFAP2D	0	NA	NA	NA	NA	NA
DLEC1	2.67273	0.716523	1.41642	0.505868	0.61295	0.698206
CYTH3	887.957	0.474885	0.0938571	5.05967	4.19992e-07	1.53556e-06
ADAM22	516.814	0.235872	0.126216	1.8688	0.0616512	0.104269
SYPL1	1345.27	-0.0595219	0.0857793	-0.693896	0.487748	0.585384
CYB561	358.905	1.71621	0.128653	13.3398	1.35736e-40	2.45321e-39
SPAG9	3199.88	-0.311464	0.0873	-3.56775	0.000360064	0.000938304
CELSR3	325.503	-0.213854	0.156276	-1.36843	0.171176	0.252659
AASS	969.568	0.211361	0.112598	1.87713	0.0605001	0.102653
PLEKHG6	23.7309	0.305827	0.494734	0.618164	0.536467	0.630763
SS18L2	208.944	-0.103239	0.181547	-0.568661	0.569586	0.659648
MPND	83.1087	1.04663	0.268019	3.90508	9.41933e-05	0.000265611
MGST1	580.074	-1.19782	0.119889	-9.99105	1.66809e-23	1.70246e-22
CRY1	674.668	0.07003	0.112105	0.624682	0.53218	0.627129
PGLYRP1	2.70204	-0.976122	1.32082	-0.739027	0.459891	0.558969
NFIX	324.966	1.35402	0.139679	9.69375	3.20532e-22	3.0762e-21
ST3GAL1	273.093	0.0147468	0.14682	0.100441	0.919994	0.942858
MMP25	63.6994	0.444266	0.285169	1.5579	0.119256	0.185957
IL32	527.474	1.30856	0.165413	7.91087	2.55594e-15	1.73109e-14
PKD1	1832.63	-0.117202	0.109503	-1.0703	0.284482	0.382543
MAPK8IP2	160.323	-0.568998	0.188384	-3.02041	0.00252432	0.00576866
MED24	1338.3	-0.560841	0.0876449	-6.39901	1.56384e-10	7.75853e-10
RHOBTB2	459.311	0.224728	0.118596	1.89489	0.0581066	0.0990262
HEATR5B	586.572	-0.148151	0.122717	-1.20726	0.227331	0.319246
SEC62	3537.05	0.425368	0.0739619	5.75118	8.86222e-09	3.79729e-08
RPS20	12111.5	0.820181	0.253689	3.23302	0.0012249	0.0029489
CSDE1	11951.2	-0.17192	0.0646153	-2.66066	0.00779871	0.0162578
UBE3C	2464.83	-0.205731	0.0784359	-2.62292	0.00871809	0.0180081
REV3L	323.552	-0.326128	0.166534	-1.95832	0.0501921	0.087119
TENM1	39.6113	1.39612	0.36506	3.82434	0.000131122	0.000362756
PAX7	5.62881	-1.28827	0.943742	-1.36507	0.172232	0.25401
MASP2	72.9126	-0.357742	0.265895	-1.34543	0.178488	0.26148
IYD	1.27429	3.94486	2.15262	1.83259	0.0668638	0.112093
FAM76A	197.179	-0.351863	0.159517	-2.2058	0.0273983	0.0508704
TRAF3IP3	2.13909	3.6335	1.7814	2.03969	0.0413814	0.0733383
POMT2	1098.2	0.0779053	0.0912647	0.853619	0.393316	0.495703
VTA1	1181.91	-0.371672	0.0925391	-4.01638	5.90996e-05	0.000170893
MLXIPL	1.33972	1.09589	1.95026	0.561918	0.574172	0.663902
BAZ1B	2989.66	-1.05494	0.0823301	-12.8135	1.37795e-37	2.27994e-36
RANBP9	772.219	0.128098	0.11268	1.13683	0.25561	0.351753
ETV7	1.88045	-1.30864	1.69768	-0.770841	0.440801	0.540906
SPRTN	375.112	-0.349534	0.143738	-2.43174	0.0150264	0.0296118
EEF1AKNMT	713.128	-0.988486	0.101272	-9.76066	1.6607e-22	1.61769e-21
DYRK4	245.063	0.599914	0.164724	3.64194	0.000270589	0.000717683
ZNF207	3100.37	-0.530264	0.0667786	-7.94062	2.01178e-15	1.37169e-14
UQCRC1	2820.46	-0.164462	0.0742493	-2.215	0.0267599	0.0497876
STARD3NL	1420.62	-0.0201432	0.0857718	-0.234847	0.814328	0.864671
CD9	323.404	1.17331	0.139393	8.41724	3.85455e-17	2.88081e-16
HHATL	0.642769	0.355473	3.03773	0.117019	0.906845	0.934095
NCAPD2	1784.68	-2.0091	0.095104	-21.1253	4.65436e-99	2.4161e-97
IFFO1	515.383	0.23911	0.112563	2.12424	0.0336502	0.0611215
GIPR	68.8471	2.25809	0.351338	6.42711	1.30051e-10	6.49376e-10
PHF7	66.1373	-0.7291	0.293651	-2.48288	0.0130325	0.0260298
SEMA3G	3.12747	-0.153732	1.20284	-0.127808	0.898301	0.927883
NISCH	2856.23	0.601846	0.0793714	7.58265	3.38569e-14	2.14133e-13
STAB1	1.54736	1.31582	1.86824	0.704309	0.481241	0.579154
FUZ	99.2814	-0.200021	0.252356	-0.792617	0.428001	0.528713
SLC6A13	6.63855	-0.149461	0.888356	-0.168245	0.866391	0.90499
IDS	315.406	0.0800415	0.141224	0.56677	0.570871	0.660696
PRSS3	4.79221	2.83157	1.15056	2.46102	0.0138541	0.027495
ZNF200	177.685	-0.541654	0.171731	-3.15408	0.00161006	0.00380071
CD4	35.9698	2.22076	0.4016	5.52979	3.2062e-08	1.3053e-07
LRRC23	157.801	0.871037	0.202414	4.30324	1.6832e-05	5.19009e-05
BTK	1.67805	0.271846	1.83173	0.14841	0.88202	0.916324
HFE	125.517	1.38816	0.243828	5.6932	1.2468e-08	5.27415e-08
SCMH1	307.989	0.363173	0.13834	2.62522	0.00865941	0.017896
FYN	1821.53	-0.0536854	0.0804964	-0.66693	0.504817	0.601339
HIVEP2	546.748	-1.42438	0.129004	-11.0414	2.41309e-28	3.01832e-27
FMO1	5.73737	4.18155	1.39335	3.00107	0.00269031	0.00611188
ELOA	1239.08	-0.30337	0.0901155	-3.36646	0.000761407	0.00189222
LYPLA2	1139.38	-0.130385	0.126923	-1.02728	0.304288	0.40396
CLCN6	749.181	-0.205216	0.0978326	-2.09762	0.0359387	0.0647878
MRC2	18300.8	1.88574	0.059442	31.724	7.24835e-221	1.38554e-218
NME1-NME2	0	NA	NA	NA	NA	NA
SLC6A7	0.150177	-0.67222	4.08047	-0.164741	0.869148	NA
TSPAN9	2632.39	1.32755	0.0725314	18.3031	7.81903e-75	2.82319e-73
BTBD7	1405.94	-0.155756	0.122024	-1.27644	0.201801	0.28881
APBA3	189.219	0.25629	0.180266	1.42173	0.155105	0.232335
MKS1	252.855	-0.667789	0.159262	-4.19301	2.75273e-05	8.28266e-05
ABHD5	282.224	-0.334938	0.138389	-2.42027	0.0155088	0.030459
ANOS1	3186.42	3.63691	0.0961727	37.8165	0	0
AKAP8L	889.403	0.388527	0.101857	3.81442	0.000136502	0.000377063
MBTD1	719.475	0.183191	0.113759	1.61035	0.107321	0.169429
UTP18	1060.07	-0.948082	0.0983301	-9.64182	5.3235e-22	5.03177e-21
RNF216	1550.08	0.12128	0.0795912	1.52378	0.127563	0.197057
TTC19	1154.22	-0.109421	0.0906687	-1.20683	0.227499	0.319454
PTBP1	6021.72	-0.590556	0.0610533	-9.67278	3.93538e-22	3.74588e-21
DPF1	152.587	-0.617078	0.192105	-3.21218	0.0013173	0.00315779
SYT7	27.4405	-0.238571	0.432432	-0.551696	0.581156	0.67026
LARS2	681.805	-0.55332	0.105056	-5.26691	1.3874e-07	5.32289e-07
PIK3C2A	1814.05	-0.24994	0.106495	-2.34696	0.0189272	0.0364027
PLAUR	1637.45	-1.59847	0.0874832	-18.2717	1.38989e-74	4.98518e-73
ANLN	2174.63	-4.85303	0.120017	-40.4363	0	0
WIZ	1399.85	-0.25866	0.0847301	-3.05275	0.00226751	0.005243
RABGAP1	1718.7	0.455902	0.0761008	5.99077	2.08854e-09	9.44462e-09
DCN	1754.73	8.30064	0.251378	33.0205	4.12115e-239	1.03016e-236
QPCTL	376.587	0.320382	0.129599	2.47211	0.013432	0.0267421
PPP5C	1761.62	-0.543004	0.0779738	-6.96393	3.30916e-12	1.85212e-11
CEP68	403.152	-0.250049	0.120438	-2.07616	0.0378788	0.0678186
MAP4K3	1196.39	-0.0848381	0.103639	-0.81859	0.41302	0.514905
ZBTB32	6.57967	-0.305129	0.840225	-0.363151	0.716492	0.787017
TYROBP	1.30209	-0.481382	1.84102	-0.261476	0.793726	0.848116
TMEM159	238.758	0.338093	0.160622	2.1049	0.0353003	0.063743
GABRA3	67.7689	-2.80781	0.329856	-8.51222	1.70631e-17	1.30038e-16
BRCA1	429.247	-3.76839	0.158909	-23.7142	2.57425e-124	1.77985e-122
ERCC1	886.491	0.550811	0.0984216	5.59645	2.18784e-08	9.06838e-08
CD22	0	NA	NA	NA	NA	NA
SEMA3B	274.068	2.01509	0.153969	13.0876	3.87567e-39	6.70627e-38
MBTPS2	725.865	-0.161236	0.103789	-1.55349	0.120306	0.187307
PRICKLE3	90.7137	0.50366	0.245649	2.05032	0.0403333	0.0716987
LTF	0.924324	-3.18521	2.59598	-1.22698	0.219831	0.310404
EXTL3	2009.59	-0.676705	0.0838183	-8.07348	6.83252e-16	4.76254e-15
NR1H4	0.32227	-1.65723	4.03018	-0.411204	0.680923	NA
ELOVL5	2910.89	-0.169652	0.0719151	-2.35906	0.0183213	0.0353712
ALOX5	1.2963	0.300624	2.12684	0.141348	0.887595	0.919924
KDM5D	939.492	0.207444	0.102932	2.01535	0.0438681	0.0773404
CALCOCO1	1326.89	1.82123	0.0958399	19.0029	1.61409e-80	6.35005e-79
UBR7	608.52	-1.66465	0.110478	-15.0677	2.64089e-51	6.17398e-50
MAP4K5	1958.27	0.0723858	0.0821818	0.880801	0.378425	0.481643
EHD3	645.33	1.03536	0.103636	9.99037	1.67947e-23	1.713e-22
PSMC4	1794.54	-0.220327	0.0977031	-2.25506	0.0241293	0.0453608
MAN2B2	745.96	1.30163	0.102825	12.6586	1.0022e-36	1.63328e-35
SLC7A14	18.4813	0.0935702	0.516382	0.181203	0.856208	0.897006
CLDN11	23.1725	0.545026	0.520478	1.04717	0.295023	0.393946
SLC25A39	1725.13	0.52223	0.0870691	5.99788	1.99911e-09	9.04778e-09
MVP	1047.85	1.28122	0.105787	12.1114	9.19543e-34	1.36695e-32
NUB1	963.222	0.253517	0.0876549	2.89222	0.00382535	0.00846098
PGM3	1454.58	0.761971	0.0845379	9.01337	1.99816e-19	1.66835e-18
RWDD2A	222.06	1.35787	0.179095	7.58181	3.40765e-14	2.1527e-13
CLK1	1646.22	0.506446	0.091189	5.55381	2.79515e-08	1.1446e-07
POLR3B	242.957	-0.617547	0.171734	-3.59595	0.000323215	0.00084799
ANGEL1	442.131	0.772049	0.123509	6.25095	4.07976e-10	1.95482e-09
RNF14	1077.1	0.0174953	0.0877886	0.199289	0.842037	0.885815
DNASE1L1	80.1113	1.08715	0.243545	4.46385	8.05005e-06	2.57779e-05
DDX11	485.83	-3.49388	0.153777	-22.7204	2.81453e-114	1.72568e-112
HEBP1	454.593	0.691965	0.138808	4.98505	6.19451e-07	2.22723e-06
GPRC5A	58.5611	-1.19459	0.305816	-3.90623	9.37473e-05	0.000264445
MAMLD1	605.183	-0.0293899	0.116467	-0.252346	0.800774	0.853626
CD6	63.5979	-0.858276	0.325835	-2.63408	0.00843645	0.0174796
TACC3	1567.1	-3.80289	0.100255	-37.932	0	0
UFL1	986.215	0.440349	0.111984	3.93226	8.41515e-05	0.000238828
POLA2	70.7183	-2.09511	0.306848	-6.82785	8.6198e-12	4.68723e-11
ZC3H3	288.376	-0.347938	0.150729	-2.30837	0.0209787	0.0399933
CAPN1	1710.06	0.091325	0.0797531	1.1451	0.252169	0.347755
ACP3	0.161135	-0.67222	4.08047	-0.164741	0.869148	NA
MDH1	3127.29	0.470492	0.0787841	5.97192	2.34481e-09	1.05565e-08
SLC30A9	1906.42	-0.000389433	0.0754502	-0.00516145	0.995882	0.997171
MTMR11	209.299	0.167617	0.184174	0.910103	0.362768	0.465777
COX15	436.706	0.0172808	0.119791	0.144258	0.885296	0.918432
CCDC88C	294.095	0.238589	0.14066	1.69621	0.0898454	0.144981
YAF2	349.244	-0.0208807	0.129052	-0.161801	0.871462	0.908943
ZMYND11	2033.32	0.0812326	0.0745795	1.08921	0.276062	0.373104
WAS	11.6303	1.34542	0.685971	1.96133	0.0498401	0.0866376
DPEP1	0.311312	-1.61304	3.93044	-0.410398	0.681514	NA
BID	550.778	-0.455921	0.118553	-3.84572	0.000120201	0.000334309
MATR3	82.2797	-0.346988	0.257068	-1.34979	0.177083	0.259771
NPC1L1	2.42301	-1.79358	1.52639	-1.17505	0.239977	0.333973
XYLT2	1157.41	0.674889	0.0879969	7.66946	1.72718e-14	1.11097e-13
RGPD5	33.577	-0.0183142	0.394521	-0.0464214	0.962974	0.973944
STMN4	17.1046	-2.06987	0.578015	-3.58099	0.000342291	0.000895004
NUDCD3	1724.99	0.325584	0.0789634	4.12322	3.73606e-05	0.000110773
ISL1	1.91165	1.66759	1.80733	0.92268	0.356174	0.458894
CHDH	48.044	-2.00227	0.369086	-5.42495	5.79706e-08	2.30577e-07
IL20RA	8.58401	-0.676669	0.765762	-0.883655	0.376882	0.480432
CLCA1	0	NA	NA	NA	NA	NA
CLCA4	0	NA	NA	NA	NA	NA
GLT8D1	1726.04	0.592765	0.0813075	7.29041	3.09004e-13	1.84584e-12
ATP2C1	1936.27	0.0243746	0.0794621	0.306745	0.759037	0.82104
IGF1	0.727359	3.1358	2.84468	1.10234	0.270315	0.366985
SLC38A5	66.9761	-2.26112	0.311302	-7.26343	3.77387e-13	2.24115e-12
RALBP1	1675.42	0.0209576	0.0956344	0.219143	0.826539	0.874437
RUFY3	1134.94	-0.32444	0.0879808	-3.68763	0.000226356	0.000606603
CNTN1	271.816	0.253952	0.141902	1.78963	0.0735132	0.12177
SLC11A1	2.15884	2.65748	1.78773	1.48651	0.137143	0.209519
WWTR1	1947.07	0.511823	0.0859726	5.95332	2.62751e-09	1.17447e-08
AGPS	1950.49	0.154927	0.0945722	1.63819	0.101382	0.161053
CXorf56	378.145	-0.0383782	0.128973	-0.297568	0.766033	0.826051
ATP1A2	1006.75	1.58212	0.0963146	16.4266	1.23354e-60	3.48567e-59
TTC27	454.182	-0.824927	0.115664	-7.13211	9.88396e-13	5.73143e-12
ZNF582	45.2638	-0.21569	0.325723	-0.662189	0.50785	0.60432
VSIG2	2.88932	-1.10569	1.29115	-0.856361	0.391798	0.494321
PHLDB1	2188.16	0.325445	0.0869189	3.74424	0.00018094	0.000491624
MARCO	0	NA	NA	NA	NA	NA
CYP24A1	3.9478	-1.6776	1.28381	-1.30674	0.191302	0.276267
PRDM11	238.169	0.97127	0.160862	6.03792	1.56112e-09	7.13261e-09
SYT13	44.7005	0.952904	0.32884	2.89778	0.00375818	0.00833283
SNAI2	3974.06	0.0585422	0.0698957	0.837565	0.402275	0.504489
CD74	25.9924	1.38393	0.496645	2.78655	0.00532723	0.0114782
HGF	2.51961	1.34778	1.52736	0.882425	0.377547	0.481083
ZRANB1	406.498	0.289032	0.139589	2.07059	0.0383975	0.0686265
NCDN	753.287	0.338205	0.0958323	3.52913	0.000416926	0.00107904
ADGRA2	2396.56	3.41915	0.0916192	37.3191	8.03457e-305	3.34733e-302
ZFP64	449.051	-0.214296	0.112915	-1.89785	0.0577161	0.098433
MNAT1	346.107	0.0605268	0.149689	0.40435	0.685955	0.761092
SAMD4A	1627.32	-0.755314	0.0882561	-8.5582	1.14642e-17	8.80713e-17
RUNX3	25.1525	0.615347	0.436789	1.4088	0.158895	0.237138
MRE11	571.841	-1.14769	0.11083	-10.3554	3.95473e-25	4.31831e-24
PLEKHB1	73.6879	1.22977	0.290922	4.22716	2.36656e-05	7.17097e-05
SERPINB1	73.3891	1.36163	0.274135	4.96702	6.79899e-07	2.43433e-06
CYP3A43	0	NA	NA	NA	NA	NA
SLC7A9	2.28219	-0.0915153	1.39069	-0.0658055	0.947533	0.963363
SPAST	628.112	-0.218713	0.106902	-2.04593	0.0407635	0.07233
NRXN3	333.667	-2.24595	0.144383	-15.5555	1.46064e-54	3.68518e-53
OSBPL5	702.687	-0.0115645	0.116465	-0.0992953	0.920904	0.943671
AQR	528.807	-0.578332	0.119243	-4.85004	1.23437e-06	4.30933e-06
CPS1	302.131	-0.443985	0.173975	-2.552	0.0107106	0.0217451
C8B	0	NA	NA	NA	NA	NA
FHL1	5721.88	1.709	0.072552	23.5555	1.10294e-122	7.40518e-121
RTF2	937.782	0.215583	0.0981947	2.19546	0.0281304	0.0521048
GABRA1	0.844832	0.861129	2.74949	0.313196	0.754132	0.817053
NLRP2	1.31687	0.26028	2.34156	0.111156	0.911492	0.937016
SLC45A4	138.303	0.0992993	0.200577	0.495068	0.620552	0.705024
RNF10	1792.61	0.24516	0.0783067	3.13076	0.00174353	0.00409496
ZNF839	128.409	-0.0351132	0.198499	-0.176894	0.859592	0.899337
ZDHHC6	682.314	-0.412357	0.101848	-4.04876	5.14891e-05	0.0001499
GRAMD1B	172.759	-0.205132	0.19104	-1.07376	0.28293	0.380707
RNH1	2200.21	0.325999	0.0940496	3.46625	0.000527775	0.00134388
NDUFS1	1899.21	-0.106791	0.0767631	-1.39118	0.164172	0.24405
RB1CC1	1470.18	0.0854559	0.0963294	0.887122	0.375013	0.478275
ERP44	1473.3	0.796817	0.0836555	9.52498	1.65078e-21	1.5257e-20
ALAS1	1030.79	-0.187713	0.0864528	-2.17128	0.0299099	0.0551181
BIRC3	17.7663	-0.858306	0.58279	-1.47275	0.140818	0.214313
AKAP11	1217.82	-0.126503	0.12187	-1.03801	0.299263	0.398854
GLRX2	353.509	-0.254038	0.144226	-1.76139	0.0781724	0.128518
SNAPC1	173.989	0.210753	0.174531	1.20754	0.227225	0.319179
DERA	342.883	-0.712005	0.13596	-5.23687	1.63326e-07	6.21625e-07
STRAP	3557.95	-0.0621209	0.0824194	-0.753717	0.451019	0.550575
ABCC2	11.6586	-1.01594	0.638685	-1.59067	0.111683	0.175597
DEF6	35.8725	0.494266	0.380749	1.29814	0.19424	0.279589
PLEKHO1	1596.49	0.686569	0.102209	6.71728	1.85154e-11	9.83772e-11
GCLM	535.86	-0.657927	0.119329	-5.51354	3.51681e-08	1.42781e-07
UBR2	735.404	-0.104094	0.109043	-0.954617	0.339771	0.442002
EHD2	1604.48	1.48211	0.0775945	19.1008	2.48774e-81	9.95585e-80
DEPDC1	589.816	-4.45584	0.158887	-28.044	4.72684e-173	5.12011e-171
CCDC28A	190.985	0.463886	0.164161	2.8258	0.00471624	0.010272
RRAGD	884.347	0.810652	0.0930327	8.71362	2.94324e-18	2.31695e-17
HSF2	507.165	-0.668079	0.120729	-5.5337	3.13549e-08	1.27843e-07
PHF20	1010.87	-0.408171	0.0888563	-4.59361	4.35654e-06	1.43551e-05
HSD17B6	19.0277	-0.0870033	0.500981	-0.173666	0.862128	0.901465
NR1H3	97.5572	0.685505	0.2225	3.08092	0.00206359	0.00480086
TYMP	15.3175	1.38474	0.602798	2.29719	0.0216082	0.0410919
NCAPH2	679.665	-0.869347	0.112128	-7.75315	8.96382e-15	5.85151e-14
TOMM34	842.199	-1.1634	0.110044	-10.5721	4.0123e-26	4.59235e-25
SEC63	3312.96	0.509187	0.0667287	7.63071	2.33456e-14	1.49279e-13
KPNA6	1594.45	-0.115451	0.0789668	-1.46202	0.143735	0.218201
VIM	33672.7	0.4035	0.108014	3.73564	0.00018724	0.000507977
RTEL1-TNFRSF6B	35.5875	-1.68656	0.398589	-4.23133	2.32317e-05	7.05022e-05
FAS	330.453	-0.264316	0.14423	-1.8326	0.0668622	0.112093
RNASET2	100.473	0.311363	0.222812	1.39742	0.162287	0.241535
CD44	2229.35	-2.74005	0.0869638	-31.5079	6.76759e-218	1.26391e-215
KCNG1	1008.71	-0.0287586	0.102338	-0.281015	0.778699	0.835436
AGPAT4	1291.23	-0.239056	0.0853327	-2.80145	0.00508729	0.0109991
SLAMF7	0	NA	NA	NA	NA	NA
BTN3A1	169.522	0.216461	0.179985	1.20266	0.229108	0.321417
MIPEP	374.049	-0.563336	0.122108	-4.61344	3.96055e-06	1.31302e-05
PRKCH	38.4204	1.53002	0.365675	4.18409	2.8631e-05	8.60042e-05
INSRR	5.02437	0.474607	0.961925	0.493393	0.621735	0.705978
IFNGR1	928.414	0.917141	0.0977792	9.37972	6.61508e-21	5.90235e-20
B4GALT7	524.282	0.864133	0.128361	6.73206	1.67275e-11	8.91692e-11
SH2D2A	4.84646	1.1302	1.01203	1.11677	0.264094	0.360316
VRK2	223.624	-0.444884	0.153174	-2.90444	0.00367913	0.00817429
TNFRSF1B	12.2037	-2.17632	0.685571	-3.17447	0.00150112	0.00356635
VEZT	1179.92	0.277424	0.0933696	2.97125	0.00296593	0.00668755
POU2F2	103.504	-1.19055	0.255947	-4.65153	3.29481e-06	1.10266e-05
BRD9	1277.83	-0.642891	0.0877679	-7.3249	2.39079e-13	1.43607e-12
SNX1	1953.07	0.0792938	0.0877176	0.903968	0.366012	0.469189
TBPL1	317.544	-0.279125	0.147398	-1.89368	0.0582677	0.0992487
ARNTL2	240.985	-1.78139	0.158987	-11.2046	3.8707e-29	4.95987e-28
BCLAF1	3655.9	-0.663711	0.0805701	-8.23769	1.75567e-16	1.26839e-15
SLC39A9	1433.06	0.453877	0.0915207	4.95928	7.0754e-07	2.52828e-06
ANK1	9.83934	-0.440586	0.805492	-0.546977	0.584394	0.673278
IBSP	0	NA	NA	NA	NA	NA
TFB1M	160.736	-0.124428	0.188499	-0.660103	0.509188	0.605569
RABEP1	1261.59	-0.0539728	0.0939274	-0.574623	0.565547	0.656498
HMGB3	3564.44	-0.155306	0.069518	-2.23405	0.0254801	0.0476246
NUP160	1283.69	-0.923688	0.114181	-8.08965	5.98348e-16	4.18149e-15
BAK1	566.223	0.231699	0.120173	1.92806	0.0538483	0.0925848
MUSK	0.865863	2.17197	2.75019	0.789753	0.429672	0.530294
IKZF2	83.3044	1.20751	0.260871	4.62877	3.67844e-06	1.22349e-05
GRN	4979.67	1.30452	0.0696116	18.7399	2.34006e-78	8.90429e-77
FAM13B	779.252	0.162934	0.121463	1.34143	0.179781	0.262876
ARHGAP31	606.393	-0.426732	0.123977	-3.44202	0.000577392	0.00146023
CENPQ	188.553	-1.89857	0.189062	-10.042	9.95957e-24	1.03006e-22
SARS1	5356.7	1.02015	0.0809376	12.6042	2.00263e-36	3.22166e-35
RANBP3	1190.4	-0.473359	0.0880345	-5.37698	7.57473e-08	2.98109e-07
ARID4A	479.25	-0.103409	0.128098	-0.807259	0.419517	0.521324
EIPR1	367.067	-0.310454	0.123491	-2.51399	0.0119375	0.0240317
PNPLA6	674.817	0.286166	0.110106	2.599	0.00934949	0.0192049
IFT88	352.618	-0.254631	0.13205	-1.92829	0.0538191	0.0925605
ALG1	369.382	0.120461	0.128722	0.935825	0.349363	0.452425
ZCCHC8	726.381	-0.323459	0.0993149	-3.2569	0.00112634	0.00272374
ABCF2	305.6	-0.344317	0.143927	-2.3923	0.016743	0.0326305
CHPF2	1963.28	0.957269	0.0797563	12.0024	3.45027e-33	5.05956e-32
LRRC7	277.164	2.34825	0.163378	14.3731	7.63773e-47	1.61586e-45
FUT8	346.699	-1.3164	0.138321	-9.51705	1.78164e-21	1.64198e-20
UBA6	1840.43	-0.632212	0.0963908	-6.55884	5.4227e-11	2.78295e-10
GAB2	346.346	0.662078	0.13578	4.87612	1.08192e-06	3.79676e-06
ATP6V0A1	1170.66	0.262397	0.0888143	2.95444	0.00313233	0.00704611
PIAS1	562	-0.578628	0.126795	-4.56349	5.03091e-06	1.64637e-05
SLC4A7	1577.53	-0.219677	0.118946	-1.84686	0.0647675	0.108916
APBA2	279.18	-0.459078	0.147936	-3.10323	0.00191422	0.00447193
MAP2K3	459.625	-0.225447	0.120039	-1.87811	0.0603658	0.102446
EFCAB1	26.3889	-0.431772	0.452528	-0.954131	0.340017	0.442286
TMSB10	22570.3	0.46673	0.200175	2.33161	0.019721	0.0377907
ASTE1	94.3962	-0.234904	0.231798	-1.0134	0.31087	0.41122
RNF19A	718.251	0.240353	0.107003	2.24623	0.024689	0.0463164
PEX3	235.672	-0.178989	0.159681	-1.12091	0.262326	0.358506
GABARAPL2	1227.94	0.463439	0.0963327	4.81082	1.50313e-06	5.20854e-06
MYOC	0.537124	2.70083	3.52561	0.76606	0.44364	NA
SH3YL1	555.728	0.766727	0.108011	7.09863	1.25997e-12	7.25699e-12
FAM136A	682.213	-0.462152	0.105948	-4.36205	1.28852e-05	4.0238e-05
VCL	12242.5	0.0277733	0.0815234	0.340678	0.733346	0.800529
DEPDC1B	319.268	-4.24687	0.198608	-21.3832	1.9151e-101	1.03377e-99
DAPK2	13.8061	0.11592	0.582342	0.199059	0.842217	0.885947
NSMAF	637.908	-0.633831	0.114494	-5.53591	3.09614e-08	1.26302e-07
ADSS2	999.943	-0.432552	0.0873641	-4.95114	7.37816e-07	2.63184e-06
STAP1	0.161135	-0.67222	4.08047	-0.164741	0.869148	NA
TIMP2	6608.82	0.715633	0.0691667	10.3465	4.34109e-25	4.737e-24
RFC1	1381.26	-0.727413	0.0919214	-7.91343	2.50401e-15	1.69663e-14
TBC1D23	858.045	0.0959465	0.116396	0.824313	0.409762	0.512218
CUL3	1410.55	-0.346632	0.0802841	-4.31756	1.57764e-05	4.88443e-05
MYOM2	55.5146	0.423899	0.312457	1.35666	0.174889	0.257321
OTC	0	NA	NA	NA	NA	NA
CYP46A1	39.8327	-0.19962	0.346959	-0.57534	0.565061	0.656169
ZZZ3	948.103	-0.552671	0.0982491	-5.6252	1.85291e-08	7.73142e-08
SLC18A1	2.6749	-4.71485	1.8042	-2.61326	0.00896831	0.0184826
USP2	33.8333	-0.449242	0.416884	-1.07762	0.281204	0.378919
CASR	0	NA	NA	NA	NA	NA
TUBG2	511.495	0.500201	0.112317	4.45348	8.44884e-06	2.69699e-05
RPL26L1	566.778	-0.226122	0.117074	-1.93145	0.0534273	0.0920168
FLT4	17.2813	-1.3917	0.573653	-2.42602	0.0152654	0.0300208
NSUN2	1755.64	-0.668048	0.079412	-8.41243	4.01619e-17	2.99885e-16
FBXO42	761.532	-0.0165941	0.107426	-0.154469	0.87724	0.913211
MFAP3	1088.84	-0.0929387	0.10119	-0.918461	0.358378	0.461148
MRI1	206.127	0.114006	0.160598	0.709883	0.477777	0.575756
METTL1	184.819	-0.312246	0.173541	-1.79926	0.071977	0.119616
HOXC8	231.656	-0.0316817	0.158347	-0.200078	0.841419	0.885458
AGA	152.455	0.335124	0.201662	1.66181	0.0965513	0.154462
PI4K2B	339.13	-1.25231	0.135628	-9.23345	2.62041e-20	2.27074e-19
BOD1L1	1418.16	-0.299294	0.104587	-2.86167	0.00421418	0.00925595
MAT2B	1072.13	-0.6268	0.093174	-6.7272	1.72959e-11	9.20485e-11
TLL1	272.685	0.617968	0.153859	4.01646	5.90801e-05	0.000170867
EDC4	797.417	-0.394577	0.104962	-3.75925	0.000170426	0.000464612
TRIO	4538.05	-0.695553	0.090209	-7.71046	1.25365e-14	8.11849e-14
VCAN	9438.77	0.801469	0.0983949	8.14543	3.77945e-16	2.66646e-15
CLEC16A	774.126	0.380079	0.108114	3.51552	0.000438895	0.00113193
MSR1	2.20829	-3.34864	1.91783	-1.74606	0.0808013	0.132145
CDH1	1.59077	3.17172	1.94191	1.63329	0.102407	0.162476
MTREX	1545.15	-0.71819	0.0949909	-7.56062	4.01147e-14	2.52531e-13
DNAH5	37.5928	-0.841091	0.40116	-2.09665	0.0360248	0.0649285
ZFYVE16	971.139	-0.447062	0.121221	-3.68799	0.000226037	0.000605847
RIPOR1	803.343	0.0907192	0.103938	0.872821	0.382761	0.486209
C6	1.4812	-3.87262	2.25251	-1.71925	0.0855691	0.138949
RAI14	7386.65	0.838058	0.0775988	10.7999	3.44645e-27	4.12355e-26
SOX30	5.17595	1.82145	1.17107	1.55538	0.119856	0.186732
PNKP	664.94	0.010658	0.112024	0.0951403	0.924203	0.946038
BEST2	0.837478	0.845289	2.75698	0.3066	0.759148	0.82105
PHLPP2	433.111	-0.472625	0.135765	-3.4812	0.000499164	0.00127603
SPDL1	1793.62	-2.8025	0.0878826	-31.8891	3.77564e-223	7.66832e-221
STAU2	578.399	-0.315093	0.103146	-3.05483	0.00225189	0.00520984
SLC66A1	493.811	0.00835868	0.114407	0.0730607	0.941758	0.959261
CTNS	397.382	0.479944	0.127117	3.77561	0.000159619	0.000436761
RTN4R	84.0351	-0.630596	0.26536	-2.37638	0.0174835	0.0339069
PHF23	1407.9	0.123814	0.0881146	1.40514	0.159979	0.238603
CDH10	48.5965	-0.761572	0.319111	-2.38655	0.0170075	0.0330944
INPP4A	799.249	-0.0689696	0.107242	-0.643124	0.520144	0.61549
RAB27B	51.6983	-4.25905	0.472379	-9.01616	1.94805e-19	1.62735e-18
PSMA4	2730.38	-0.493634	0.0723475	-6.8231	8.90961e-12	4.83511e-11
MYO16	37.6885	0.508734	0.385362	1.32015	0.186786	0.271143
LSG1	818.583	-0.726359	0.106537	-6.81791	9.23777e-12	5.00985e-11
PARP3	56.8051	0.780228	0.299697	2.60339	0.0092307	0.0189753
TNC	33703.1	-0.16563	0.0679604	-2.43715	0.0148033	0.0292218
THAP3	229.552	-0.0454467	0.160665	-0.282867	0.777279	0.834494
RIPOR3	8.29805	1.17752	0.819216	1.43737	0.150613	0.226735
TDP1	544.544	-1.74658	0.122976	-14.2026	8.82827e-46	1.79302e-44
AIFM2	233.491	0.890014	0.169197	5.26022	1.43885e-07	5.50857e-07
SPATA7	129.759	0.627619	0.198717	3.15836	0.00158662	0.00374863
MED17	108.132	-0.627154	0.2136	-2.93612	0.0033235	0.00744524
RETSAT	482.221	0.627064	0.115366	5.43545	5.4657e-08	2.18306e-07
CAPG	493.747	-0.126472	0.136388	-0.927294	0.353774	0.456816
AP2S1	2321.63	-0.231965	0.10918	-2.12462	0.0336186	0.0610796
USH2A	2.42805	-0.304478	1.54339	-0.197279	0.84361	0.887068
ZPBP	0.721068	3.12526	2.82766	1.10524	0.269054	0.365792
TG	18.7342	1.04648	0.511752	2.0449	0.0408643	0.0724931
ADAM28	3.4656	-4.05007	1.64455	-2.46272	0.0137888	0.0273754
BARX2	51.7498	-0.919126	0.378074	-2.43107	0.0150542	0.0296522
DCUN1D1	731.978	-0.59499	0.113091	-5.26118	1.43134e-07	5.48114e-07
JADE2	224.478	-0.668334	0.156309	-4.27572	1.90524e-05	5.83093e-05
ZIC2	1434.49	-0.409315	0.0810432	-5.05058	4.40481e-07	1.60722e-06
LCP2	1.01095	0.353313	2.35389	0.150098	0.880688	0.915452
TRIT1	463.584	-0.400577	0.121457	-3.2981	0.000973399	0.00237831
ADRB1	6.1237	1.22003	0.931508	1.30973	0.190286	0.275212
GUCA2B	0	NA	NA	NA	NA	NA
CUL7	745.015	0.856525	0.100962	8.48363	2.18282e-17	1.65422e-16
CTNNA1	9715.66	0.205333	0.0603642	3.40157	0.00066999	0.0016789
PHKA2	274.588	0.0037972	0.148785	0.0255214	0.979639	0.985427
CNTLN	300.329	-0.907092	0.16808	-5.39678	6.78489e-08	2.6803e-07
EPHA3	1014.03	-0.426162	0.0923148	-4.6164	3.90461e-06	1.29553e-05
HSPA5	51273.3	1.78179	0.0599223	29.7349	2.71611e-194	3.90544e-192
DSG2	2202.86	-0.0469805	0.112359	-0.418127	0.675854	0.752607
GEMIN8	287.873	0.696684	0.14766	4.71815	2.37998e-06	8.07644e-06
OFD1	523.515	-0.033455	0.118846	-0.2815	0.778327	0.835178
GPM6B	891.322	-1.73981	0.0992918	-17.5222	9.70658e-69	3.1107e-67
MAGEC2	0	NA	NA	NA	NA	NA
PREX2	28.5217	-2.75327	0.511244	-5.38544	7.22667e-08	2.84652e-07
WDR37	647.382	-0.116258	0.111568	-1.04204	0.297394	0.396721
YTHDC2	942.962	-0.488261	0.11674	-4.18245	2.88384e-05	8.65633e-05
CTPS2	483.889	-0.440796	0.118678	-3.71422	0.00020383	0.000550594
ATP6V1H	891.071	-0.044709	0.0911225	-0.490647	0.623676	0.707695
POLR2B	3148.72	-0.91244	0.0746181	-12.2281	2.19947e-34	3.33991e-33
FAM214A	370.291	0.578136	0.138541	4.17302	3.0059e-05	9.00939e-05
ARAP2	36.612	-0.159642	0.377546	-0.422842	0.672411	0.749542
TPR	3382.82	-0.54518	0.104505	-5.21676	1.8208e-07	6.89292e-07
CP	2.05048	1.27404	1.55819	0.817641	0.413562	0.515422
KIAA0556	452.648	0.370882	0.127115	2.91768	0.00352648	0.007862
DTNBP1	215.633	0.220556	0.194065	1.1365	0.255746	0.351851
XK	19.4769	0.250541	0.503968	0.497138	0.619092	0.703771
ANO2	21.9522	0.950119	0.453404	2.09552	0.0361245	0.0650938
C12orf4	574.169	-0.208718	0.11131	-1.8751	0.0607783	0.103039
SCML1	272.788	-0.0463278	0.149606	-0.309664	0.756816	0.819237
WWC3	1403.47	0.749086	0.0943527	7.93921	2.03471e-15	1.38674e-14
ARHGAP6	70.6524	0.933603	0.267742	3.48695	0.000488557	0.00125107
FAM184B	18.8074	-0.527749	0.513528	-1.02769	0.304094	0.403868
MAP4	11078.2	0.372101	0.0696981	5.33875	9.35873e-08	3.64566e-07
GOPC	816.837	0.0905607	0.0991515	0.913357	0.361055	0.464116
ROS1	46.4328	-6.97274	1.06247	-6.5628	5.28081e-11	2.71184e-10
USP28	641.98	0.473913	0.124373	3.81041	0.000138738	0.000382784
HDAC9	862.974	-0.306837	0.134505	-2.28123	0.0225346	0.0426839
TSPAN17	1383	0.343536	0.0855912	4.01368	5.97788e-05	0.000172704
NOP16	327.058	-0.739714	0.173658	-4.25959	2.04799e-05	6.24778e-05
CC2D2A	625.074	0.483732	0.112292	4.30781	1.64877e-05	5.0918e-05
RRM2B	1103.96	0.455649	0.0999877	4.55705	5.18761e-06	1.69492e-05
ZNF800	342.342	-0.534921	0.138271	-3.86865	0.000109438	0.000306156
TNFRSF17	0.150177	-0.67222	4.08047	-0.164741	0.869148	NA
SNX29	348.458	0.394516	0.13431	2.93735	0.00331029	0.00741767
LMO3	47.0699	-0.523893	0.318978	-1.64241	0.100505	0.159864
MRPS10	856.652	-0.399468	0.0975051	-4.0969	4.18727e-05	0.000123296
GUCA1A	0.512505	-0.688876	3.30321	-0.208548	0.834801	NA
RSF1	1665.38	-0.0695154	0.102794	-0.676258	0.498877	0.595967
VPS13D	733.254	0.192492	0.132177	1.45632	0.145303	0.220272
CELF2	216.163	0.285048	0.173683	1.64119	0.100757	0.160202
FAM120A	2119.51	0.0274034	0.0733382	0.373658	0.708659	0.780895
R3HDM1	867.433	-0.48322	0.099572	-4.85297	1.21626e-06	4.24985e-06
COL9A2	472.783	3.05892	0.139054	21.9982	2.99821e-107	1.75233e-105
KITLG	522.706	-1.49971	0.114189	-13.1336	2.11481e-39	3.68685e-38
ERCC8	350.272	-0.209798	0.13474	-1.55706	0.119457	0.186199
ADAMTS6	373.681	0.258692	0.134389	1.92495	0.0542362	0.0931828
H6PD	607.596	0.879027	0.109159	8.05275	8.0951e-16	5.6209e-15
VAMP3	2196.5	0.120644	0.0732222	1.64764	0.0994263	0.15838
PER3	73.2238	-0.950887	0.263741	-3.60538	0.000311693	0.000818949
UTS2	0.805676	-2.98221	3.05103	-0.977442	0.32835	0.429483
TNFRSF9	47.8472	-0.30474	0.325454	-0.936352	0.349092	0.452185
EPN3	2.40026	1.1567	1.60059	0.722671	0.469882	0.568313
LTBP1	2277.13	0.729263	0.0788503	9.2487	2.27229e-20	1.97751e-19
RCN1	1871.02	1.02242	0.2699	3.78815	0.000151771	0.000417043
ELN	9754.67	4.21358	0.0744555	56.592	0	0
RFC2	481.268	-1.84308	0.130859	-14.0845	4.7298e-45	9.37192e-44
ARID1B	1657.99	0.0049283	0.0924485	0.0533086	0.957486	0.970077
CLPTM1L	2322.35	0.51736	0.0869479	5.95023	2.6777e-09	1.19624e-08
NEDD4L	389.338	-1.70335	0.13797	-12.3458	5.12938e-35	7.99829e-34
FOXP3	4.5601	-0.609197	1.15321	-0.528263	0.597317	0.684236
PPP1R3F	59.8434	0.784025	0.281593	2.78425	0.00536522	0.0115524
HEXB	1716.74	-0.486316	0.0817367	-5.94979	2.68491e-09	1.19913e-08
PTCD2	222.457	-0.609511	0.157862	-3.86103	0.000112909	0.000314996
NEXMIF	252.447	3.40694	0.183045	18.6126	2.53794e-77	9.52342e-76
JKAMP	1111.88	0.0888557	0.0936742	0.948562	0.342843	0.445428
DKK3	3203.63	1.15959	0.0722832	16.0424	6.46418e-58	1.74179e-56
ARHGEF5	49.9864	1.56443	0.354796	4.40937	1.03671e-05	3.26758e-05
NFE2L3	317.004	0.167901	0.144789	1.15962	0.246203	0.341148
MCUR1	791.054	-0.19154	0.101826	-1.88106	0.0599639	0.101839
LIMA1	2853.29	0.252245	0.0805763	3.13051	0.00174504	0.00409791
LETMD1	615.836	0.526547	0.102464	5.13884	2.76443e-07	1.02949e-06
SLC4A8	205.743	-1.65136	0.190701	-8.6594	4.74272e-18	3.70124e-17
LAMC3	86.0643	1.51223	0.241149	6.27094	3.58883e-10	1.72723e-09
PTGER3	63.8198	4.78117	0.458778	10.4216	1.97704e-25	2.1927e-24
TNIP3	4.87218	1.02008	1.1192	0.911435	0.362066	0.465158
MAPK9	1102.87	-0.429121	0.100587	-4.26616	1.98869e-05	6.07716e-05
COL23A1	51.3537	0.986698	0.336343	2.9336	0.00335053	0.00749958
BCAR1	3403.59	0.0940228	0.0765719	1.2279	0.219484	0.310075
FAM160A2	495.972	0.240798	0.110801	2.17325	0.0297616	0.0548635
HERPUD1	4427.81	2.33621	0.0734088	31.8246	2.95743e-222	5.78943e-220
HOMER3	150.469	0.697117	0.220912	3.15563	0.00160153	0.00378167
RAD51	223.578	-3.33273	0.202046	-16.495	3.98853e-61	1.13297e-59
POLQ	361.15	-4.82809	0.214242	-22.5357	1.85482e-112	1.13298e-110
PIK3CB	546.178	-0.0905672	0.114532	-0.790762	0.429083	0.529727
CYBA	1285.62	0.919527	0.1173	7.83912	4.53711e-15	3.01386e-14
THOC3	443.374	-1.10733	0.123164	-8.99069	2.45674e-19	2.03539e-18
HEBP2	689.691	0.0421589	0.114089	0.369527	0.711735	0.783222
MPHOSPH9	530.123	-1.10982	0.122342	-9.07145	1.1744e-19	9.91771e-19
PLEKHA5	966.464	-0.70538	0.111008	-6.35431	2.0936e-10	1.02553e-09
PRSS8	1.91133	-0.697639	1.50576	-0.463314	0.643139	0.724016
SIKE1	1115.05	-0.0223974	0.0905309	-0.247401	0.804598	0.856859
RRP12	1038.91	-0.340206	0.0896003	-3.79694	0.000146496	0.00040323
FNIP2	556.2	-0.716978	0.139962	-5.12265	3.0127e-07	1.11784e-06
MSMO1	2728.03	-0.0531606	0.0743805	-0.714712	0.474787	0.572961
TTC17	1782.76	0.753676	0.0861557	8.74784	2.17473e-18	1.72703e-17
ALX4	6.941	3.05636	1.06041	2.88224	0.00394864	0.00871232
FSTL4	8.0517	-0.237614	0.764812	-0.310683	0.756042	0.818617
FOXN3	1644.72	0.393413	0.100173	3.92733	8.58938e-05	0.000243518
METTL24	86.6476	2.51413	0.269595	9.32556	1.10395e-20	9.7696e-20
AKR7A2	688.852	0.450392	0.128475	3.50569	0.000455425	0.00117233
MRTO4	1154.71	-1.55065	0.0929592	-16.6809	1.80363e-62	5.2331e-61
NNAT	16.6925	-0.617601	0.527385	-1.17106	0.241573	0.335694
USE1	280.435	0.985423	0.18461	5.33786	9.4051e-08	3.66109e-07
MCF2L2	45.8864	-0.487992	0.350869	-1.39081	0.164283	0.244191
NRIP2	40.5964	0.743518	0.347223	2.14133	0.0322478	0.0588523
LAMA3	3.9353	0.907388	1.11206	0.815952	0.414528	0.516309
AP5M1	744.942	-0.533063	0.103433	-5.15371	2.55386e-07	9.5391e-07
ANAPC4	621.119	-0.40411	0.112344	-3.59707	0.000321817	0.000844594
KCNQ1	1.19244	0.753396	2.05755	0.366161	0.714245	0.785292
TRAPPC3	1062.55	0.311772	0.105761	2.94789	0.00319949	0.00718723
THRAP3	3300.51	-0.44001	0.0736037	-5.9781	2.25761e-09	1.01752e-08
PHPT1	265.447	1.11167	0.441076	2.52036	0.0117236	0.0236392
ENTPD2	1.79937	2.24051	1.9482	1.15004	0.250127	0.345772
LY75	1.17187	0.805932	2.23162	0.361142	0.717994	0.788081
ARID4B	1095.24	-0.560241	0.107962	-5.18922	2.11175e-07	7.94621e-07
OPN3	28.0201	0.0964724	0.409567	0.235547	0.813784	0.864433
SDCCAG8	273.61	-0.165183	0.14651	-1.12745	0.259553	0.355583
PTPRN	330.958	-2.0996	0.158362	-13.2582	4.04413e-40	7.22077e-39
HHAT	330.337	-0.0973912	0.131039	-0.743222	0.457348	0.556545
KIF1B	3208.68	-0.401509	0.0986776	-4.0689	4.72363e-05	0.000138312
FOXC1	346.606	2.90871	0.152919	19.0212	1.13783e-80	4.48726e-79
TBC1D22A	385.672	0.848086	0.130174	6.515	7.26885e-11	3.69653e-10
SYNE2	721.535	-1.09143	0.127424	-8.56536	1.07738e-17	8.28065e-17
PLEKHH1	60.4213	-0.0782144	0.285887	-0.273585	0.784403	0.840033
ATP9A	1071.86	0.626303	0.101271	6.18441	6.23344e-10	2.9425e-09
SPO11	0	NA	NA	NA	NA	NA
CBLN4	0	NA	NA	NA	NA	NA
CHRDL2	1.43807	-2.68512	2.38211	-1.1272	0.259656	0.355695
FAM168A	1240.77	0.045741	0.0963072	0.474949	0.634824	0.71712
RELT	116.823	-1.90472	0.227023	-8.38999	4.86183e-17	3.61038e-16
GALC	698.56	0.717495	0.0986292	7.27468	3.47255e-13	2.06825e-12
NOP58	1252.29	-1.32079	0.0887868	-14.876	4.7198e-50	1.07707e-48
SZRD1	2620.65	-0.239815	0.0905422	-2.64866	0.00808117	0.0168035
KCNH2	245.065	2.51064	0.181992	13.7953	2.72103e-43	5.18912e-42
CUL1	1506.85	-0.543773	0.0908181	-5.9875	2.13097e-09	9.61779e-09
FAM114A2	513.682	0.146129	0.119269	1.2252	0.220498	0.311237
CYFIP2	1188.39	0.227585	0.0858814	2.64999	0.00804938	0.0167439
TAB2	2227.31	-0.21928	0.0848185	-2.58528	0.00973	0.019921
GINM1	683.436	0.579455	0.107081	5.41137	6.25447e-08	2.48102e-07
EIF2AK2	1351.89	-0.544034	0.101243	-5.37357	7.71938e-08	3.03544e-07
USP36	933.427	-0.481119	0.0927296	-5.1884	2.12106e-07	7.97937e-07
KMT2C	1217.82	-0.0538451	0.0945808	-0.569303	0.569151	0.659379
MCOLN3	10.3392	0.0943995	0.717704	0.13153	0.895356	0.925593
CCDC85A	6.9357	0.938395	0.822411	1.14103	0.253858	0.349668
PUM2	2208.31	-0.547511	0.0962928	-5.6859	1.30128e-08	5.49747e-08
MRPL43	479.475	0.227665	0.17713	1.2853	0.198687	0.284878
ITIH4	2.07343	-3.26871	1.797	-1.81898	0.0689145	0.115174
ITIH1	2.20169	4.73186	1.86632	2.53539	0.0112322	0.0227245
HPF1	486.931	-0.621152	0.120599	-5.15055	2.59724e-07	9.69223e-07
ZFR	2545.65	-0.675718	0.0778734	-8.67713	4.05873e-18	3.17354e-17
ZNF280C	225.973	-0.942383	0.157851	-5.97007	2.37153e-09	1.0665e-08
NPFFR2	42.2316	-1.37411	0.349483	-3.93183	8.43013e-05	0.000239212
PHF21B	126.415	-0.328953	0.201338	-1.63384	0.102293	0.162326
TRAF1	85.1434	1.31561	0.29185	4.50784	6.54901e-06	2.118e-05
RC3H2	1958.66	-0.100243	0.108094	-0.927366	0.353737	0.456805
IL17RB	60.978	-0.374408	0.285028	-1.31359	0.188985	0.273675
TRAF3IP2	150.417	0.05063	0.185055	0.273595	0.784396	0.840033
GYG2	527.333	0.834437	0.110817	7.52985	5.07999e-14	3.18072e-13
DCBLD2	12011.7	-2.33233	0.066155	-35.2555	2.82393e-272	8.99672e-270
SERPINB3	0	NA	NA	NA	NA	NA
SOAT1	1038.55	-2.02632	0.0928493	-21.8238	1.3806e-105	7.84335e-104
PKP2	90.0061	1.39725	0.247429	5.64708	1.63195e-08	6.84227e-08
MSH4	3.44172	0.906061	1.27937	0.708209	0.478816	0.57688
F7	5.80517	3.55774	1.16262	3.06011	0.00221259	0.00512769
GDI2	6631.63	0.0361033	0.06519	0.553817	0.579704	0.669013
PRDM1	28.8414	-2.14811	0.449028	-4.78391	1.71917e-06	5.91553e-06
ATG5	592.08	-0.244883	0.110225	-2.22168	0.0263052	0.0490371
TMCC3	59.9336	0.240824	0.300392	0.8017	0.422727	0.52391
PITHD1	1055.68	0.0265239	0.0915201	0.289815	0.771957	0.830592
MTA3	990.244	0.457462	0.100342	4.55901	5.13957e-06	1.68024e-05
USP13	415.924	-1.37133	0.130219	-10.5309	6.22053e-26	7.06297e-25
ATP11B	771.005	0.0668042	0.115846	0.576665	0.564166	0.655457
LAMC2	57.3239	-1.01871	0.300338	-3.39187	0.000694167	0.00173574
CDK14	1513.78	-0.0234228	0.0915869	-0.255744	0.798149	0.851554
SEC61A1	9723.91	0.648096	0.0589711	10.99	4.26702e-28	5.28434e-27
PPP1R12A	2485.28	-0.303609	0.0969426	-3.13185	0.00173711	0.00408163
RASGRF1	8.68683	-1.41544	0.796482	-1.77712	0.0755484	0.124747
CAMK2B	8.25633	1.32978	0.896975	1.48252	0.138203	0.210867
CROCC	833.074	0.489408	0.10936	4.47521	7.63352e-06	2.45069e-05
POLR3E	621.093	0.0874766	0.109369	0.799828	0.423811	0.525053
ATP2B4	2453.36	-0.81809	0.111905	-7.3106	2.65954e-13	1.59454e-12
ZC3H11A	3.31523	-0.308204	1.2157	-0.25352	0.799866	0.852883
RIOK2	616.936	0.00567872	0.10677	0.0531867	0.957583	0.970077
YIPF1	480.789	0.228887	0.116411	1.9662	0.0492756	0.0857756
NDC1	946.251	-2.351	0.0983492	-23.9046	2.74436e-126	1.96433e-124
DGKG	13.6843	-4.58058	0.993544	-4.61034	4.02004e-06	1.33192e-05
FLYWCH1	762.511	0.0874122	0.09922	0.880994	0.378321	0.481623
UNKL	184.142	-0.328843	0.17327	-1.89786	0.0577141	0.098433
TBXAS1	26.9203	-1.61941	0.446649	-3.62569	0.000288186	0.000761002
PARP12	67.5393	0.372146	0.262153	1.41958	0.155731	0.233016
ALDH18A1	2118.36	0.462583	0.0759041	6.09431	1.09908e-09	5.0747e-09
TARBP1	940.384	-0.149966	0.0915609	-1.63788	0.101447	0.161125
GATB	351.884	-0.662485	0.130924	-5.06006	4.19119e-07	1.53271e-06
MXD1	332.907	0.31445	0.134283	2.34169	0.0191967	0.0368511
CDK17	909.115	-0.504712	0.0909408	-5.5499	2.85831e-08	1.17012e-07
DNAJC25	282.802	0.0385024	0.136407	0.282262	0.777742	0.834716
SLC2A3	2237.93	-0.346004	0.0868805	-3.98253	6.81859e-05	0.000195774
PSD	61.5855	0.611446	0.274462	2.2278	0.025894	0.0483316
CTDP1	725.574	-0.132559	0.0980437	-1.35204	0.176364	0.258951
YBX3	3724.12	0.22736	0.0802391	2.83353	0.00460368	0.0100444
STYK1	7.14582	-1.94175	0.876389	-2.21563	0.0267171	0.049725
WNK1	6528.61	0.692567	0.0997905	6.94021	3.9152e-12	2.18081e-11
CCAR1	2519.88	-0.981199	0.0722635	-13.5781	5.40237e-42	1.00894e-40
OGFR	963.824	0.0940424	0.0970552	0.968958	0.332566	0.434263
GNA15	0.483405	-2.24444	3.679	-0.610066	0.541818	NA
CREB3L3	0	NA	NA	NA	NA	NA
PIGV	125.765	1.20643	0.210486	5.73165	9.94582e-09	4.24257e-08
PTPRU	1385.62	0.472188	0.0842661	5.60353	2.10025e-08	8.71421e-08
SNRNP40	829.313	-1.1797	0.0992519	-11.8859	1.40157e-32	2.01528e-31
RIMBP2	132.345	1.13814	0.235792	4.82687	1.38693e-06	4.81617e-06
COL11A1	37012.7	2.42933	0.0795135	30.5525	5.24207e-205	8.51731e-203
QSER1	1433.61	-1.22808	0.0937568	-13.0986	3.35459e-39	5.81702e-38
MPC1	759.737	0.772428	0.0994845	7.76431	8.20921e-15	5.37402e-14
ACAA1	488.837	0.441006	0.113901	3.87182	0.000108024	0.000302511
BCAT1	7108.47	0.220854	0.0854315	2.58516	0.00973341	0.0199255
HDAC7	2104.16	-0.210635	0.0750138	-2.80796	0.00498571	0.0108025
LZTS1	2896.04	0.275984	0.0811746	3.39988	0.000674146	0.00168828
PRDM6	100.967	5.26895	0.408143	12.9096	3.9756e-38	6.65247e-37
WNT8A	0	NA	NA	NA	NA	NA
SPAG4	26.1909	1.4098	0.509185	2.76873	0.00562752	0.0120739
NCKAP1	5716.32	-0.233398	0.0734961	-3.17565	0.00149501	0.00355286
MRPS35	1151.07	-0.338391	0.0828114	-4.08628	4.38339e-05	0.000128884
GUCY1B1	348.671	1.86376	0.135426	13.7622	4.30364e-43	8.19761e-42
SFSWAP	1059.9	-0.379991	0.0907383	-4.18777	2.81712e-05	8.46699e-05
TNK2	837.76	0.617551	0.0923066	6.69022	2.2284e-11	1.17785e-10
MON2	1132.65	0.354111	0.0896363	3.95053	7.79782e-05	0.00022224
CDH3	41.1417	2.82514	0.390572	7.23333	4.71298e-13	2.78764e-12
ARSF	0	NA	NA	NA	NA	NA
GPBP1	1698.7	-0.308452	0.0890092	-3.46539	0.000529453	0.00134752
DGAT2	18.7355	-0.233672	0.512523	-0.455926	0.648443	0.728524
ZNF112	121.648	-0.516093	0.201113	-2.56619	0.0102823	0.0209489
CS	3809.81	-0.434879	0.0676689	-6.42657	1.30515e-10	6.51494e-10
LTK	4.40763	1.69408	1.1516	1.47106	0.141274	0.214847
MRPS24	4.77245	-0.9462	1.0631	-0.890041	0.373444	0.476647
ELMO2	960.914	0.141362	0.0904989	1.56202	0.118282	0.184634
WAPL	1453.01	-0.581361	0.0924124	-6.29095	3.15538e-10	1.52495e-09
VMP1	7926.37	0.904672	0.0608628	14.8641	5.6347e-50	1.28046e-48
APPBP2	1550.82	0.365183	0.0950931	3.84026	0.000122902	0.000341486
POLD1	602.852	-2.11472	0.113474	-18.6362	1.63549e-77	6.16552e-76
SEZ6	30.9943	0.54349	0.426734	1.2736	0.202804	0.290092
EIF4B	8274.76	0.674898	0.0662865	10.1815	2.39747e-24	2.53607e-23
SLC6A16	238.593	0.0575203	0.169697	0.338958	0.734642	0.801538
BICRA	354.62	-0.36732	0.12758	-2.87914	0.00398762	0.00878996
SPHK2	259.576	-0.0643559	0.145128	-0.443443	0.657446	0.736093
RPL18	10079.7	0.649796	0.103225	6.29492	3.07554e-10	1.48813e-09
CA11	139.565	1.47302	0.194152	7.58695	3.27529e-14	2.07312e-13
ISOC2	1018.17	1.6355	0.141305	11.5743	5.5643e-31	7.58463e-30
U2AF2	3517.85	-0.672255	0.0768246	-8.75051	2.12392e-18	1.68833e-17
EPN1	2080.07	0.13575	0.0746492	1.8185	0.0689875	0.11526
MED29	875.548	0.0581708	0.0982882	0.591839	0.553958	0.646356
AHRR	3.51833	-3.07969	1.46081	-2.1082	0.0350136	0.0632744
GSC2	0.300354	-1.56858	4.03787	-0.388468	0.69767	NA
ZNF275	778.199	0.0282831	0.114204	0.247655	0.804401	0.856706
MTMR1	484.702	-0.112904	0.111236	-1.01499	0.310109	0.410448
GPC1	2199.31	0.134314	0.0798588	1.68189	0.0925903	0.148892
ADCK1	141.503	0.10237	0.204592	0.500361	0.616821	0.701632
HAGH	595.959	1.23276	0.124886	9.87108	5.55627e-23	5.55217e-22
RNF4	1759.27	-0.270583	0.0758951	-3.56522	0.000363548	0.000946927
CASP8	245.527	-0.645346	0.160235	-4.02749	5.63758e-05	0.000163424
LIMCH1	348.405	0.425381	0.137624	3.0909	0.00199553	0.00465117
INTS13	850.248	-0.58379	0.101852	-5.73174	9.94032e-09	4.24134e-08
TM7SF3	885.082	-0.428816	0.0930248	-4.60969	4.03266e-06	1.33556e-05
DLX3	1.96967	2.40761	1.7749	1.35647	0.174949	0.257362
SPA17	25.0256	-2.16461	0.489443	-4.4226	9.75214e-06	3.08698e-05
TSPAN32	3.72828	2.89937	1.30086	2.22882	0.0258259	0.0482265
CCN5	1.39095	1.01649	1.93125	0.52634	0.598652	0.685524
DMRT3	0	NA	NA	NA	NA	NA
ST3GAL6	33.3189	-3.10032	0.486179	-6.37691	1.80701e-10	8.91597e-10
ATP2C2	13.3681	-0.11528	0.591394	-0.19493	0.845448	0.888598
NGFR	31.5195	-0.010375	0.475458	-0.0218211	0.982591	0.98733
CDON	580.705	0.135438	0.150639	0.899089	0.368605	0.471769
TAF2	930.586	-0.479568	0.110602	-4.33598	1.45114e-05	4.50738e-05
HIPK2	2744.31	-1.37418	0.103781	-13.2412	5.07419e-40	9.03017e-39
TNPO3	1796.85	-0.512375	0.0943061	-5.4331	5.53835e-08	2.21044e-07
BORCS8-MEF2B	0.362985	2.13332	4.03903	0.528177	0.597376	NA
RFXANK	685.375	0.559757	0.115953	4.82745	1.38291e-06	4.80324e-06
TMEM161A	566.016	0.314277	0.112641	2.79007	0.0052696	0.0113736
LPAR2	251.201	0.685404	0.167395	4.09452	4.23047e-05	0.000124478
CTSA	1174.39	0.705177	0.109555	6.43672	1.22079e-10	6.1126e-10
SUGP2	3312.66	-0.241578	0.0739059	-3.26873	0.0010803	0.00262217
SLC12A2	701.563	-0.372908	0.110862	-3.36372	0.000768995	0.00190874
SNX24	398.965	0.604308	0.123656	4.887	1.02385e-06	3.60695e-06
EYA2	4.09598	-3.35951	1.41269	-2.37809	0.0174026	0.0337742
CNN2	8999.11	0.60954	0.0666576	9.14434	5.99972e-20	5.13341e-19
ABCA7	168.622	0.0260844	0.20472	0.127415	0.898612	0.928133
SNCAIP	218.362	1.87502	0.187515	9.99929	1.53493e-23	1.57149e-22
DDX20	714.017	-1.23156	0.106338	-11.5816	5.10707e-31	6.96722e-30
BTBD1	1754.25	0.0338013	0.0742527	0.455221	0.648951	0.728892
FAR2	579.584	0.993922	0.120769	8.22994	1.87309e-16	1.35022e-15
BCAS1	2.43207	0.124475	1.74938	0.0711538	0.943275	0.960237
POU1F1	0	NA	NA	NA	NA	NA
CHI3L2	1.01604	1.31022	2.40168	0.545542	0.585381	0.673936
SBNO2	960.096	0.08365	0.104862	0.797716	0.425035	0.526169
PMS1	532.033	-0.356597	0.14912	-2.39134	0.0167868	0.0327002
HMG20B	823.297	0.400547	0.114373	3.50211	0.000461594	0.00118689
CALCRL	126.98	-0.623658	0.211891	-2.94329	0.0032474	0.00728479
TAF11	743.669	-0.393725	0.0996267	-3.952	7.75006e-05	0.000220956
ANKS1A	723.267	0.234962	0.104347	2.25174	0.0243388	0.045707
AP3D1	4777.63	0.686819	0.0696497	9.86105	6.14029e-23	6.1207e-22
ZNF76	459.497	0.142596	0.114231	1.24831	0.211917	0.301112
SLC9A3R2	510.487	1.12524	0.152248	7.39083	1.45918e-13	8.86312e-13
NTHL1	242.524	-0.475674	0.154935	-3.07016	0.00213942	0.00496519
UHRF1BP1	730.906	1.03978	0.12664	8.21053	2.20211e-16	1.58318e-15
GNAI3	2763.59	-0.692976	0.0784265	-8.83599	9.92164e-19	8.00828e-18
IPO5	6156.66	-0.773994	0.0820555	-9.43257	4.00178e-21	3.60627e-20
OAT	2265.02	0.426375	0.0730741	5.83482	5.38476e-09	2.3494e-08
WDR3	842.538	-0.955479	0.105313	-9.07274	1.16057e-19	9.81109e-19
PKN2	1417.08	-0.815758	0.110033	-7.41374	1.22785e-13	7.48597e-13
WDR18	769.016	-0.267257	0.117934	-2.26615	0.023442	0.044217
TRAM2	2619.13	0.975831	0.0917812	10.6321	2.11214e-26	2.44431e-25
NTN1	130.986	0.0632654	0.214289	0.295235	0.767815	0.827614
GLP2R	14.9859	2.61073	0.626149	4.16951	3.0526e-05	9.13689e-05
MCM10	484.608	-6.05991	0.25458	-23.8036	3.06795e-125	2.13026e-123
DGKA	943.81	0.683092	0.0951	7.18287	6.82617e-13	3.99682e-12
ERBB3	13.6192	1.31818	0.625093	2.10877	0.0349641	0.0631991
ROPN1	0.642982	-1.21941	2.77713	-0.439089	0.660597	0.73879
ANKRD44	138.411	0.220041	0.215901	1.01918	0.308119	0.408212
KARS1	3026.71	-0.236666	0.0821397	-2.88127	0.00396077	0.00873553
ADAT1	419.717	-0.498454	0.125785	-3.96275	7.40909e-05	0.000211681
PDIA5	948.147	0.919575	0.093468	9.83839	7.69283e-23	7.63549e-22
TBC1D22B	305.437	0.290577	0.140451	2.06888	0.0385571	0.0688586
NDUFB4	857.331	0.329032	0.143237	2.29712	0.0216117	0.0410938
SPEN	1306.14	-0.840845	0.117391	-7.16278	7.9056e-13	4.61553e-12
MYLK	2374.67	3.48446	0.092389	37.715	0	0
ZC3H15	1711.82	-0.565532	0.0844484	-6.69678	2.13059e-11	1.12761e-10
MAP2K4	985.402	-0.0285974	0.0924057	-0.309477	0.756959	0.819282
PACC1	369.486	-0.436834	0.130423	-3.34937	0.000809948	0.00200336
SNAP91	35.8461	1.30296	0.37424	3.48163	0.000498379	0.00127462
SLK	1412.47	-0.68822	0.0931324	-7.38969	1.47169e-13	8.93575e-13
CYB5R4	244.378	-0.534066	0.149207	-3.57935	0.000344447	0.000900495
COL17A1	18.3993	-5.62211	1.12639	-4.99126	5.99875e-07	2.15923e-06
GSTO2	22.8039	0.0875352	0.507305	0.172549	0.863006	0.90215
SEC61A2	442.577	-0.993564	0.12483	-7.95931	1.73005e-15	1.18257e-14
PRKCQ	19.2437	-2.6937	0.61634	-4.37048	1.23974e-05	3.88269e-05
TLE2	6.17019	2.29418	0.973123	2.35755	0.0183962	0.0355072
ASB1	990.94	0.195126	0.104357	1.86979	0.0615125	0.104077
FAM107B	596.58	-1.23676	0.114956	-10.7586	5.40104e-27	6.41492e-26
ME1	1000.53	1.01198	0.0989985	10.2222	1.57739e-24	1.68062e-23
TBC1D1	1345.52	-0.0608089	0.0818989	-0.742488	0.457792	0.556972
CDK13	1294.36	0.121095	0.093255	1.29854	0.194103	0.279468
MTHFD2	3756.33	1.24985	0.0787746	15.8661	1.08728e-56	2.8311e-55
SLC9A7	82.5561	-0.333854	0.248629	-1.34278	0.179343	0.262353
FOXJ2	546.896	-0.325033	0.12385	-2.62441	0.00867985	0.0179359
YBX1	14449.7	-0.260844	0.0972105	-2.68329	0.00729023	0.0152958
PDE4A	194.615	1.55243	0.179471	8.65002	5.14912e-18	4.01069e-17
PPP2R5A	305.995	0.445065	0.132414	3.36116	0.000776156	0.00192475
CTNNA2	38.1595	-0.601698	0.357868	-1.68134	0.0926964	0.149022
ELAVL1	2128.68	-0.821615	0.07895	-10.4068	2.30918e-25	2.55409e-24
TIE1	47.7639	-1.43451	0.355833	-4.03141	5.5443e-05	0.000160979
DIP2B	1278.37	-0.738689	0.108299	-6.82081	9.05311e-12	4.91135e-11
SMARCD1	1737.74	-0.731023	0.0763701	-9.5721	1.04753e-21	9.78734e-21
KDM4A	479.194	0.537601	0.121401	4.42829	9.49822e-06	3.01244e-05
NFYC	641.019	-0.072983	0.117669	-0.620238	0.535101	0.629749
ZMYND12	2.07934	1.94436	1.82742	1.064	0.28733	0.385734
SLC9A3	28.0441	0.00114933	0.434436	0.00264557	0.997889	0.998381
NGEF	41.9516	2.66803	0.384282	6.9429	3.84134e-12	2.1404e-11
ASPM	1318.2	-5.29828	0.137117	-38.6407	0	0
CD84	0.150177	-0.67222	4.08047	-0.164741	0.869148	NA
ELOVL1	1226.96	-0.0954432	0.0851074	-1.12144	0.262099	0.358316
SPI1	0.852682	-0.369049	2.54005	-0.145292	0.884481	0.917925
ZNRD1	70.6063	0.131728	0.34755	0.379018	0.704675	0.777084
MPPED2	297.544	3.5043	0.177679	19.7226	1.37953e-86	5.9932e-85
CLDN18	34.0852	0.5912	0.395685	1.49412	0.135144	0.20688
ZBTB11	578.374	-0.531501	0.121087	-4.38942	1.13655e-05	3.57189e-05
ATXN3	405.094	0.340898	0.126887	2.68663	0.00721767	0.0151574
GOLGA5	995.024	0.7995	0.0962634	8.30534	9.95358e-17	7.27839e-16
FGFR2	1049.48	1.44376	0.0943598	15.3006	7.57736e-53	1.8321e-51
LRRC40	800.082	-1.22517	0.0993085	-12.3371	5.72075e-35	8.90332e-34
ISOC1	283.764	-0.385925	0.140784	-2.74125	0.00612052	0.0130323
EML1	434.607	-0.182765	0.123503	-1.47984	0.138915	0.211734
TRMT11	291.491	-0.277436	0.143151	-1.93807	0.0526141	0.090751
THUMPD1	926.566	-0.371409	0.103003	-3.60579	0.000311201	0.00081779
MSANTD3	630.397	-0.899475	0.124679	-7.2143	5.4212e-13	3.19144e-12
KIF26A	35.8705	1.07178	0.379118	2.82704	0.00469799	0.0102364
ATG2B	785.303	0.0643154	0.108718	0.59158	0.554132	0.646434
ARFGEF1	1227.92	-0.207431	0.100842	-2.05698	0.0396878	0.0706527
ACSM2B	1.45823	4.13897	2.11772	1.95444	0.0506488	0.0877991
ZFAT	95.2279	0.225573	0.242968	0.928405	0.353197	0.456217
MTFR1	640.018	-0.307447	0.101248	-3.03657	0.0023929	0.00550629
STAG3	69.7834	0.255674	0.273684	0.934197	0.350202	0.453141
FECH	833.139	0.324527	0.0928086	3.49673	0.000470995	0.00120954
MYO9A	601.87	0.132203	0.143339	0.922311	0.356366	0.459069
DDX3Y	1914.78	-0.129456	0.104786	-1.23544	0.216667	0.306736
PFKP	2448.16	-0.148395	0.0797285	-1.86126	0.0627076	0.105835
IDI1	2237.85	-0.29987	0.0795351	-3.77029	0.000163056	0.000445642
SP100	251.422	0.366616	0.155158	2.36286	0.0181347	0.0350402
KLF6	4582.15	0.287492	0.0712343	4.03587	5.44015e-05	0.000158068
PLPP1	273.903	0.752564	0.150466	5.00156	5.68695e-07	2.05146e-06
NEO1	2062.56	1.54532	0.0770533	20.0552	1.81694e-89	8.2926e-88
TRAM1	5532.17	1.05088	0.0756973	13.8827	8.06529e-44	1.55083e-42
PHKA1	118.433	-0.652283	0.20257	-3.22004	0.00128172	0.00307521
TNFRSF1A	1946.21	0.0442916	0.0748859	0.591455	0.554216	0.646486
CACNB1	235.292	0.0776895	0.155402	0.499927	0.617126	0.701881
EVI5	740.935	0.311243	0.103411	3.00977	0.00261449	0.00595211
STOML1	266.407	1.27443	0.166062	7.67442	1.66164e-14	1.06966e-13
PKM	23517.4	-1.18303	0.0591782	-19.9909	6.60744e-89	2.9739e-87
DHX29	909.899	-0.394862	0.0971038	-4.06639	4.77463e-05	0.000139655
DNTTIP2	1282.57	-0.859966	0.086499	-9.94193	2.73485e-23	2.76686e-22
METTL22	386.811	-0.132115	0.120126	-1.09981	0.271416	0.368234
TP53BP1	1634.18	-0.153796	0.111828	-1.37529	0.169043	0.250238
TRO	1746.34	0.457913	0.0821278	5.57561	2.46666e-08	1.01541e-07
RRP15	613.237	-0.928931	0.119309	-7.7859	6.92191e-15	4.55702e-14
RHOA	10435.2	0.0802556	0.0652339	1.23027	0.218594	0.309017
DHX8	950.451	-0.25881	0.104038	-2.48764	0.0128595	0.0257095
PRKCZ	154.48	2.78545	0.237795	11.7137	1.08501e-31	1.50807e-30
ZFY	320.758	-0.47711	0.134108	-3.55766	0.00037418	0.000973527
IARS2	2028.23	-0.268602	0.0802611	-3.3466	0.000818095	0.00202043
SYT1	150.802	-0.762409	0.206621	-3.6899	0.000224346	0.000601514
NAV3	677.661	-0.0538702	0.134309	-0.401091	0.688353	0.762813
IDH3G	708.324	0.0701152	0.123261	0.568836	0.569468	0.659589
ROGDI	200.71	1.85359	0.270492	6.85266	7.24908e-12	3.96043e-11
PDZD4	658.45	0.785083	0.115307	6.80866	9.85111e-12	5.32294e-11
ATP2B3	4.52349	0.618168	1.07407	0.575536	0.564929	0.656062
ROCK1	2051.37	-0.215515	0.0984489	-2.18911	0.0285891	0.0528639
CBFB	1209.79	-0.606855	0.0869089	-6.98266	2.89651e-12	1.62734e-11
PDK3	326.17	0.297558	0.135116	2.20224	0.0276484	0.0512821
HYAL2	700.453	-0.10787	0.13955	-0.772988	0.43953	0.539514
HDAC4	308.319	0.024405	0.142946	0.17073	0.864436	0.903297
RASSF1	477.033	-0.661033	0.132725	-4.98046	6.34346e-07	2.27927e-06
FGFR3	454.419	0.655241	0.122955	5.3291	9.87032e-08	3.83759e-07
IFI35	50.0685	0.883838	0.306111	2.88731	0.00388553	0.00858473
HEATR6	457.778	-0.419876	0.126286	-3.32479	0.000884849	0.00217241
COASY	655.704	0.379395	0.101206	3.74876	0.000177713	0.000483261
PLEKHH3	509.227	0.979986	0.118344	8.28081	1.22344e-16	8.91809e-16
MEF2A	935.196	0.514367	0.0970728	5.29878	1.1658e-07	4.5057e-07
OTUD5	1497.25	0.563024	0.0799354	7.04349	1.87488e-12	1.06738e-11
TFE3	1308.29	0.429662	0.0863491	4.97587	6.49563e-07	2.33137e-06
TBC1D25	258.733	0.139539	0.145619	0.958249	0.337937	0.440074
ACSL4	2139.1	-0.96866	0.100404	-9.64759	5.03253e-22	4.76507e-21
INPP5A	617.959	0.0213782	0.111524	0.191691	0.847984	0.890332
GPKOW	362.558	0.157241	0.128516	1.22351	0.221137	0.31195
GRIPAP1	892.385	0.266431	0.0998278	2.66891	0.00760984	0.0159028
FTSJ1	897.067	-0.218784	0.0922397	-2.37191	0.0176964	0.0342952
PRR11	1040.07	-3.43672	0.115762	-29.6879	1.0999e-193	1.56764e-191
REEP1	33.3738	1.2125	0.465361	2.60551	0.00917368	0.0188747
ATP11A	687.686	-0.0931216	0.107274	-0.868069	0.385357	0.488209
POLR1A	1664.46	-0.703064	0.106024	-6.63116	3.33061e-11	1.73615e-10
LAPTM4A	4899.57	0.910582	0.0687467	13.2455	4.7939e-40	8.54072e-39
TTC7A	706.796	0.490662	0.100794	4.86795	1.12759e-06	3.95022e-06
IP6K2	1860.12	-0.155141	0.0876441	-1.77013	0.0767057	0.126363
STON1-GTF2A1L	44.7544	0.468249	0.330182	1.41815	0.156146	0.233594
SRBD1	367.383	-0.783189	0.13951	-5.61387	1.9785e-08	8.23113e-08
KIF2A	1548.93	-0.495052	0.0771376	-6.41777	1.38283e-10	6.88363e-10
RASGRP2	45.6967	3.0883	0.388294	7.95351	1.81294e-15	1.2382e-14
PSME4	2213.18	-0.353992	0.106079	-3.33707	0.000846677	0.00208595
IFT80	364.997	0.307047	0.147083	2.08758	0.036836	0.0661412
SIRT2	930.574	0.673213	0.0951295	7.07681	1.47511e-12	8.45117e-12
ERLEC1	1261.78	0.790344	0.0908433	8.70008	3.31645e-18	2.60192e-17
PPP2R5B	432.568	0.686411	0.120647	5.68942	1.27468e-08	5.38929e-08
PYGM	7.15494	1.20838	0.857702	1.40885	0.158879	0.237136
PAGE1	0	NA	NA	NA	NA	NA
PITX1	0.321385	0.289562	3.92199	0.0738303	0.941145	NA
TRPC7	15.7731	3.08814	0.652649	4.7317	2.22649e-06	7.56662e-06
MAST4	153.272	0.49126	0.204555	2.40161	0.0163231	0.031904
ADGRF5	4.23418	2.2902	1.28911	1.77657	0.0756386	0.12482
SDK2	820.291	0.130014	0.117567	1.10587	0.268784	0.365516
ADAM7	0	NA	NA	NA	NA	NA
NUP133	1252.62	-0.533691	0.0825978	-6.46133	1.03789e-10	5.21448e-10
NUCKS1	9274.47	-0.941646	0.0801869	-11.7431	7.65944e-32	1.07008e-30
VPS35	3353.74	-0.488195	0.0716748	-6.81124	9.67578e-12	5.23691e-11
DNAJA2	1526.92	-0.321489	0.0779608	-4.12373	3.72793e-05	0.000110552
BCL3	79.3507	0.02364	0.281212	0.0840649	0.933005	0.952527
KCNAB2	63.1587	1.34474	0.281155	4.78292	1.72764e-06	5.94116e-06
ABCC9	6.89223	1.17856	0.812718	1.45015	0.147017	0.222311
GAL	142.522	-3.38541	0.255859	-13.2316	5.76827e-40	1.02318e-38
CLEC2D	121.876	0.40432	0.203809	1.98381	0.0472766	0.0826679
FUNDC1	256.448	-0.260897	0.160058	-1.63001	0.103099	0.163461
MAOB	40.0608	2.13602	0.393733	5.42504	5.79425e-08	2.30522e-07
RORA	86.1762	0.0340705	0.259851	0.131115	0.895684	0.92565
DRD4	72.6217	1.90282	0.319184	5.96152	2.49897e-09	1.12164e-08
TGFBR3	44.9005	-0.8013	0.356984	-2.24464	0.0247913	0.0464924
PLA2G10	3.09166	0.137935	1.32212	0.104329	0.916908	0.940348
HES2	3.07623	-0.826363	1.19947	-0.688939	0.490861	0.588425
ATP1B3	3050.9	-0.254794	0.0763324	-3.33795	0.000843975	0.0020796
NEDD4	676.983	-0.256865	0.134046	-1.91625	0.0553337	0.0948578
PIGB	89.8262	-0.0726269	0.22971	-0.316168	0.751875	0.815293
MAPK6	2820.89	-0.657519	0.0833378	-7.88981	3.02656e-15	2.03373e-14
GNB5	395.514	0.93024	0.122559	7.59013	3.19588e-14	2.02522e-13
RAB27A	279.155	-0.703017	0.159358	-4.41155	1.02634e-05	3.23741e-05
HDHD5	672.737	-0.529554	0.119164	-4.44392	8.83341e-06	2.81256e-05
UFD1	927.335	-0.209994	0.0995661	-2.10909	0.034937	0.0631712
LRP6	1028.63	-0.179988	0.117379	-1.53339	0.125179	0.193816
GUCY2C	0.360534	2.12547	3.71477	0.572168	0.567208	NA
SCT	6.16649	1.97044	1.11395	1.76887	0.0769152	0.126659
PHRF1	1348.95	-0.447573	0.0837497	-5.34418	9.08285e-08	3.54414e-07
ELP1	1246.16	-0.241685	0.0945223	-2.55691	0.0105606	0.0214701
NUCB2	1058.65	1.35671	0.087896	15.4354	9.45885e-54	2.32507e-52
PFN2	7610.22	0.823421	0.0799057	10.3049	6.69487e-25	7.24705e-24
PTPN3	48.8182	0.242747	0.366504	0.662331	0.507759	0.604268
SPTB	45.4336	0.6656	0.337329	1.97315	0.0484785	0.0845058
DAPP1	4.40725	-0.765292	1.06891	-0.715957	0.474018	0.57216
FGF10	0.8773	2.1555	2.73734	0.787443	0.431023	0.531435
SLC44A1	463.471	-0.178018	0.112708	-1.57946	0.114231	0.179049
TMEM260	232.464	0.12173	0.147945	0.822806	0.410618	0.513012
SMG6	614.072	-0.225286	0.128712	-1.75031	0.0800643	0.131151
EXOC5	1968.37	-0.494075	0.0902824	-5.47256	4.43587e-08	1.78667e-07
CLTCL1	742.397	1.38991	0.102817	13.5183	1.22035e-41	2.25577e-40
FGF22	12.9201	-0.434472	0.731087	-0.594281	0.552324	0.645053
FSTL3	850.873	1.84666	0.104075	17.7435	1.93489e-70	6.38984e-69
DGCR2	1773.96	-0.109436	0.0795833	-1.37511	0.169097	0.250253
RNF126	828.084	-0.378542	0.115336	-3.28209	0.00103041	0.00250817
MNT	352.334	0.132339	0.129455	1.02228	0.306649	0.406563
ZXDC	437.313	-0.156609	0.139627	-1.12163	0.262022	0.35824
JMJD6	603.786	-0.17913	0.115298	-1.55363	0.120274	0.187282
POLB	336.04	-0.493799	0.149959	-3.29289	0.000991638	0.0024196
ST6GALNAC1	0.750886	-2.89046	3.12277	-0.925609	0.354649	0.457437
WIPI1	831.394	2.43452	0.116647	20.8708	9.8632e-97	4.96153e-95
FRMPD1	1.96985	3.50396	1.87204	1.87173	0.0612433	0.103698
GBA2	1117.02	0.35593	0.0882973	4.03104	5.55315e-05	0.000161207
NDST1	4733.05	0.0423207	0.088208	0.479783	0.631381	0.714255
ASNS	82.1786	1.64615	0.2705	6.08559	1.16067e-09	5.35145e-09
AP3M2	784.9	-0.0808245	0.10619	-0.761132	0.446578	0.546647
CNGB1	1.50755	0.564788	1.90953	0.295774	0.767403	0.827335
ST6GALNAC2	6.16271	3.27419	1.26237	2.59369	0.00949524	0.0194673
CHAT	3.14265	0.114294	1.39378	0.0820028	0.934644	0.953818
PABPC1	21325.4	0.772241	0.0578781	13.3426	1.30887e-40	2.36821e-39
TESK2	20.0252	0.392795	0.494237	0.79475	0.426759	0.527539
CFAP20	447.898	-0.508208	0.138394	-3.67217	0.000240501	0.000642496
CSNK2A2	568.424	-0.0989815	0.106136	-0.932593	0.35103	0.453966
PTPN21	844.511	0.185877	0.106285	1.74884	0.0803179	0.13146
EIF2B3	541.219	-0.114816	0.120234	-0.954934	0.339611	0.441899
CAMK2A	27.4283	-2.32718	0.484075	-4.80748	1.52844e-06	5.29174e-06
TCOF1	1874.74	-1.10936	0.0806696	-13.7518	4.96537e-43	9.43595e-42
CDC42	6626.28	0.0370466	0.0711307	0.520824	0.602489	0.688947
OSBPL3	344.51	-3.4699	0.185081	-18.748	2.00998e-78	7.66622e-77
EPHA8	1.07425	3.70039	2.75485	1.34323	0.179198	0.262213
SLC12A3	0	NA	NA	NA	NA	NA
RAD18	428.176	-2.16905	0.132895	-16.3216	6.93293e-60	1.93218e-58
ATP2B1	1488.02	0.0929322	0.088034	1.05564	0.291133	0.389735
TRPM5	0.429961	-2.09446	3.4448	-0.608008	0.543182	NA
NCK2	1062.19	0.379145	0.0882052	4.29844	1.72001e-05	5.29696e-05
MAP4K4	8148.46	0.0386683	0.0652724	0.592415	0.553573	0.646107
MGAT4A	31.1194	-0.710896	0.404547	-1.75726	0.0788728	0.129499
RPL31	8074.02	1.21845	0.270337	4.50715	6.57031e-06	2.12447e-05
WDR1	10141.5	0.414126	0.0675982	6.12629	8.99504e-10	4.19132e-09
SNX13	772.175	-0.0325927	0.112093	-0.290766	0.771231	0.830139
MS4A12	0.150177	-0.67222	4.08047	-0.164741	0.869148	NA
ARHGAP10	468.791	0.36376	0.119736	3.03801	0.00238147	0.00548541
RPS6KA2	3237.1	1.23358	0.0883037	13.9698	2.38305e-44	4.6205e-43
ING3	222.496	-0.526685	0.179915	-2.92741	0.00341798	0.00763792
VASH1	1226.6	1.04952	0.0908971	11.5462	7.71305e-31	1.04959e-29
LMCD1	1381.51	1.70493	0.0940484	18.1282	1.90917e-73	6.67102e-72
BUD23	1431.95	-0.327319	0.0838274	-3.90468	9.43519e-05	0.000266012
SEL1L	4127.67	1.3709	0.0975339	14.0556	7.11656e-45	1.40328e-43
TRIP13	850.951	-3.84884	0.124226	-30.9826	9.24849e-211	1.63336e-208
ATP6AP1	3442.23	0.821969	0.0813251	10.1072	5.13302e-24	5.35654e-23
TCF3	2794.83	-0.385153	0.0827676	-4.65343	3.26456e-06	1.09344e-05
TRIB2	2310.16	0.339686	0.0783518	4.3354	1.45495e-05	4.51835e-05
DAZAP1	2216.8	-0.414455	0.0847182	-4.89216	9.97373e-07	3.51831e-06
MBD3	967.706	-0.0431577	0.144213	-0.299263	0.764739	0.825229
PRLH	0	NA	NA	NA	NA	NA
HLTF	680.11	-0.516385	0.155845	-3.31345	0.000921519	0.00225665
FAM50A	1427.62	0.602935	0.103118	5.84704	5.00391e-09	2.18734e-08
FAM3A	659.808	0.590593	0.107953	5.47082	4.47969e-08	1.80387e-07
CPSF1	1921.76	-0.0600543	0.0792126	-0.758141	0.448367	0.548079
MYO3B	0.419676	-2.06133	3.88054	-0.531197	0.595282	NA
CYBRD1	1974.68	2.11993	0.0855481	24.7805	1.45433e-135	1.13606e-133
CDH19	1.08896	3.71792	2.7436	1.35512	0.175378	0.257784
PDCD2	970.321	-0.0294018	0.0930782	-0.315883	0.752091	0.815318
SLC6A15	775.264	-1.13791	0.100379	-11.3361	8.68944e-30	1.13585e-28
RDH11	1665.67	0.174432	0.0891078	1.95754	0.0502837	0.0872594
PRKACA	995.859	0.0264448	0.106022	0.249429	0.803029	0.855581
ADGRL1	1091.07	0.789474	0.0846283	9.32872	1.07158e-20	9.48829e-20
SPP2	0.358082	2.11629	4.04057	0.523761	0.600445	NA
ACTN1	19497.7	0.425447	0.0609356	6.98191	2.91202e-12	1.63548e-11
ZFYVE26	830.314	-0.212188	0.109101	-1.94488	0.0517888	0.0894678
RPS6KA6	163.319	-0.0291968	0.191631	-0.15236	0.878903	0.914122
EPN2	333.882	0.2629	0.150588	1.74583	0.0808413	0.132197
PTPN18	206.656	-0.483311	0.162086	-2.98183	0.00286535	0.00647928
LIMS2	552.531	2.90083	0.139641	20.7735	7.5224e-96	3.73774e-94
ASIC4	2.33563	-0.13801	1.46765	-0.0940349	0.925081	0.946519
SPEG	1176.79	1.67077	0.0901207	18.5393	9.95945e-77	3.69455e-75
LNX1	93.8279	0.432528	0.260121	1.6628	0.0963531	0.154195
ALDH3A2	533.844	-0.446694	0.107462	-4.15675	3.22804e-05	9.6414e-05
TFRC	2620.79	-1.14962	0.0839677	-13.6912	1.14563e-42	2.16192e-41
SREBF1	1077.59	1.33378	0.109302	12.2027	3.00867e-34	4.53478e-33
TRPC5	0.72003	-2.83711	2.82093	-1.00574	0.314542	0.415199
AFF4	4427.37	-0.230807	0.0980582	-2.35378	0.0185837	0.0358267
UBE2D1	549.957	-0.452408	0.119704	-3.7794	0.000157209	0.000430602
MPP5	820.774	-0.272162	0.0928688	-2.93061	0.00338295	0.00756485
RHOBTB1	811.347	-0.164236	0.0982791	-1.67112	0.094698	0.151921
SMC1A	2194.76	-1.59816	0.0952016	-16.7871	3.03465e-63	8.86817e-62
HSD17B10	1105.79	0.137907	0.128475	1.07341	0.283088	0.380825
MARK2	724.572	-0.179546	0.09927	-1.80866	0.0705038	0.117528
HMMR	577.203	-4.94527	0.179216	-27.5939	1.31801e-167	1.39059e-165
CHFR	1188.31	0.300237	0.0889745	3.37441	0.000739731	0.00184286
TRHDE	23.7599	-1.4375	0.472849	-3.04007	0.00236522	0.00545339
P4HA2	2012.96	1.29948	0.0747401	17.3866	1.04246e-67	3.27619e-66
FCGR2B	0.300354	-1.56858	4.03787	-0.388468	0.69767	NA
NFATC3	324.423	-0.686973	0.166617	-4.12307	3.73848e-05	0.000110804
TRNT1	523.791	0.0316353	0.114798	0.275574	0.782876	0.83884
ACADVL	3631.47	0.42362	0.0737361	5.74508	9.18792e-09	3.9327e-08
STK10	996.239	0.175625	0.091998	1.90901	0.0562611	0.0962445
FBXW11	1781.41	0.288526	0.0759802	3.79739	0.000146228	0.000402629
ACAP1	26.4932	0.783838	0.44818	1.74893	0.0803023	0.131448
CRMP1	1798.51	-0.826953	0.0853273	-9.69154	3.27563e-22	3.14006e-21
EVC	425.929	0.165823	0.152461	1.08764	0.276752	0.37385
DERL2	1164.06	0.477934	0.0847481	5.63947	1.70576e-08	7.1394e-08
SIDT1	1.6662	-0.336346	1.68229	-0.199933	0.841533	0.885515
NDE1	369.265	-0.807451	0.123537	-6.53613	6.31325e-11	3.22166e-10
IRAG1	248.421	1.87518	0.158195	11.8536	2.06108e-32	2.94274e-31
TMEM38A	18.5231	1.44163	0.520498	2.76972	0.00561045	0.0120389
AP1M1	1545.62	-0.15525	0.0768431	-2.02035	0.0433473	0.0765219
PVR	989.834	-0.406487	0.101731	-3.9957	6.45045e-05	0.000185762
XRCC1	313.933	-0.30405	0.168266	-1.80695	0.0707694	0.117874
SCARB1	512.931	0.359599	0.110164	3.26422	0.00109765	0.00266227
CYP2W1	6.68564	2.23571	0.950423	2.35233	0.018656	0.0359405
MCM2	651.398	-2.65178	0.119392	-22.2107	2.70673e-109	1.61095e-107
MOV10L1	22.2457	3.274	0.571605	5.72773	1.01781e-08	4.33938e-08
PANX2	86.1504	0.907462	0.267728	3.38949	0.000700235	0.00174957
SELENOO	400.505	0.0343425	0.141101	0.243388	0.807705	0.85945
TP63	1.30634	-1.32653	1.93615	-0.685135	0.493259	0.590538
ALPK1	57.8142	0.204415	0.285385	0.716277	0.47382	0.571987
LLGL2	22.0979	1.53062	0.499226	3.06599	0.00216952	0.00503145
PDE8A	340.216	0.46139	0.134835	3.42188	0.000621905	0.00156517
CLCN4	423.31	0.303694	0.133382	2.27687	0.0227937	0.0431244
NLE1	444.926	-0.35455	0.122043	-2.90512	0.00367114	0.00815875
SDHA	49.7688	0.0432537	0.350775	0.123309	0.901862	0.930583
SMARCE1	150.669	-0.484257	0.202864	-2.3871	0.0169819	0.0330485
FNDC8	5.39219	-0.318685	0.911774	-0.349522	0.726698	0.795217
GSDMB	314.989	1.46457	0.143981	10.172	2.64512e-24	2.79077e-23
KDM5A	1117.72	0.0236811	0.111789	0.211837	0.832234	0.878917
ADAM11	55.2578	-0.571817	0.293557	-1.94789	0.051428	0.0889034
PPP2R3A	359.11	-0.624717	0.131692	-4.74378	2.09762e-06	7.1526e-06
FERMT2	7454.58	1.26823	0.0738987	17.1617	5.13549e-66	1.58033e-64
ABCB11	0.461276	-0.523621	3.42742	-0.152774	0.878577	NA
DHRS9	0	NA	NA	NA	NA	NA
CD5L	0	NA	NA	NA	NA	NA
PTGS2	5.08378	-1.55411	0.979999	-1.58583	0.112778	0.177045
IGF2BP2	2365.5	-0.130004	0.0713811	-1.82127	0.0685661	0.114627
MAP3K13	361.623	0.165311	0.124578	1.32696	0.184521	0.268454
ST6GAL1	484.008	-0.606835	0.126581	-4.79406	1.63441e-06	5.63579e-06
TBX21	0.544478	2.71811	3.50801	0.77483	0.43844	0.538334
FRY	75.4931	0.498962	0.251891	1.98087	0.0476062	0.0831726
PICALM	5776.73	0.000842333	0.0709485	0.0118725	0.990527	0.993094
NSF	801.397	0.109947	0.0968078	1.13572	0.256073	0.352078
GLI2	1141.94	-0.443807	0.0887916	-4.9983	5.7838e-07	2.08463e-06
CLASP1	1639.06	-0.380197	0.10527	-3.61164	0.000304272	0.000801006
MRPS34	467.993	0.255752	0.34301	0.745611	0.455902	0.555243
NOTCH3	9282.92	0.914594	0.0793475	11.5264	9.70779e-31	1.31663e-29
CLNS1A	1398.35	-0.0455624	0.0891118	-0.511294	0.609145	0.694846
PPP2R2C	5.55027	0.540591	0.925057	0.584387	0.55896	0.650618
TEAD2	1164.84	-0.244997	0.082871	-2.95636	0.0031129	0.00700338
EED	395.873	-1.20267	0.124108	-9.69053	3.30802e-22	3.16914e-21
CDHR2	10.0749	-1.69516	0.730469	-2.32064	0.0203061	0.0388066
SNCB	2.02858	-2.18655	1.72227	-1.26958	0.204236	0.291883
TSG101	1239.2	0.252681	0.0895253	2.82246	0.00476572	0.0103687
NCBP3	1963.57	-0.260529	0.0792646	-3.28682	0.00101325	0.00246936
ATP2A3	42.8062	1.26988	0.35669	3.56018	0.000370604	0.000964842
CA12	175.077	0.430909	0.181795	2.3703	0.0177736	0.0344243
MGLL	730.082	-0.210319	0.112147	-1.87538	0.0607406	0.102997
NTN4	374.375	1.70315	0.135087	12.6077	1.9138e-36	3.0818e-35
BCS1L	514.486	-0.453993	0.113909	-3.98558	6.73155e-05	0.00019348
NUAK1	2110.34	0.921299	0.0918694	10.0284	1.14404e-23	1.17872e-22
DPP8	1049.81	-0.0950284	0.0954508	-0.995575	0.319457	0.42032
SLC24A1	206.704	0.638612	0.166624	3.83265	0.000126771	0.000351437
ZNF532	2173.08	-0.185949	0.0950718	-1.95588	0.050479	0.0875609
SCARF1	46.37	1.29484	0.362552	3.57147	0.000354983	0.000926252
LMAN1	4754.48	0.525907	0.0776846	6.76977	1.28988e-11	6.92597e-11
HACD3	4519.17	-0.688469	0.0707769	-9.72731	2.3062e-22	2.23309e-21
IPCEF1	2.49321	0.869459	1.7483	0.497317	0.618965	0.703677
ZZEF1	1067.16	0.158239	0.117294	1.34908	0.177312	0.260039
NOX3	0	NA	NA	NA	NA	NA
ENO1	26037.4	-0.645265	0.0681662	-9.46606	2.90602e-21	2.64373e-20
SLC12A1	3.06231	3.24692	1.55158	2.09266	0.0363797	0.0655028
MYDGF	2986.95	0.903668	0.0997507	9.05927	1.31332e-19	1.10621e-18
ANO8	418.022	-0.763576	0.134479	-5.67804	1.36245e-08	5.74839e-08
TUBE1	441.862	0.784936	0.131822	5.9545	2.60867e-09	1.16693e-08
ARHGEF10L	623.06	0.352194	0.105158	3.3492	0.000810466	0.00200405
TXK	6.1124	0.637968	1.0039	0.635492	0.525107	0.620235
WSCD2	63.2087	1.38199	0.287807	4.80179	1.57257e-06	5.43639e-06
KCNQ2	218.928	-1.9882	0.187211	-10.6201	2.40237e-26	2.77425e-25
TACR2	4.65265	-0.369561	1.00971	-0.366008	0.714359	0.785312
ACTR6	398.325	-0.351204	0.124362	-2.82404	0.00474218	0.0103244
TIPIN	179.966	-1.8681	0.180203	-10.3666	3.51693e-25	3.85062e-24
SRI	1173.8	-0.568554	0.107158	-5.30578	1.12192e-07	4.34436e-07
EIF4G3	2870.07	0.426527	0.0848787	5.02513	5.03093e-07	1.82502e-06
NUP37	317.769	-1.40473	0.141719	-9.91207	3.68939e-23	3.7049e-22
SEMA3A	273.043	-0.0317512	0.154374	-0.205677	0.837044	0.882849
GTSE1	755.56	-4.48752	0.147752	-30.3719	1.29065e-202	2.05593e-200
SEMA3C	14170.3	0.543694	0.0968487	5.61385	1.97876e-08	8.23113e-08
TTC38	405.347	-0.276271	0.125528	-2.20088	0.0277445	0.0514487
ACAT1	402.549	-0.494267	0.139227	-3.55009	0.000385104	0.00100067
GRAMD4	717.94	0.544464	0.100741	5.40462	6.49474e-08	2.57131e-07
CELSR1	1890.26	-0.344686	0.0992247	-3.47379	0.000513162	0.00130893
WNT8B	1.33881	1.05811	1.84701	0.572875	0.56673	0.657542
ZNF638	2346.84	-0.1408	0.0811576	-1.73489	0.0827597	0.134967
SLC25A40	344.988	-1.07139	0.144999	-7.38892	1.48022e-13	8.9808e-13
TIMM21	600.092	-1.11367	0.112686	-9.88296	4.93531e-23	4.94383e-22
ADD2	438.631	-2.38414	0.132071	-18.052	7.61387e-73	2.62654e-71
FGF4	0	NA	NA	NA	NA	NA
RASAL2	1071.94	0.0795293	0.0969952	0.819929	0.412256	0.514268
VPS9D1	288.654	1.08537	0.158208	6.86039	6.86716e-12	3.75809e-11
ZNF37A	608.496	-0.258256	0.137397	-1.87963	0.0601581	0.102137
MARK3	2035.64	-0.226666	0.0769785	-2.94454	0.00323438	0.0072586
SLC25A3	11011.3	0.392672	0.0727415	5.39818	6.73203e-08	2.66071e-07
FNDC3B	3395.45	0.14577	0.0875484	1.66502	0.0959095	0.153606
FOSL2	2222.94	-0.0024901	0.0759604	-0.0327816	0.973849	0.980889
CACNG5	0.311312	-1.61304	3.93044	-0.410398	0.681514	NA
CACNG4	380.707	-2.03748	0.136102	-14.9702	1.14959e-50	2.64194e-49
FRYL	1090.78	-0.739635	0.0938819	-7.87836	3.31718e-15	2.22442e-14
TMEM131	1181.52	-0.439983	0.0862444	-5.10158	3.3683e-07	1.24269e-06
FSCN1	9924.3	-0.617102	0.0682899	-9.0365	1.61767e-19	1.35624e-18
ACTB	99816.9	-0.113872	0.0727442	-1.56537	0.117496	0.183564
MOCOS	14.5798	-0.501517	0.603876	-0.830496	0.406259	0.508817
PLD1	92.5459	0.960559	0.259938	3.69535	0.000219586	0.000590018
ATP12A	3.37499	-0.736934	1.23445	-0.596976	0.550524	0.643241
WDR62	486.8	-4.83042	0.188803	-25.5844	2.2766e-144	1.98872e-142
DLG1	1413.76	0.3782	0.10203	3.70677	0.000209921	0.000566014
RAB7A	5359.07	-0.0892806	0.065805	-1.35674	0.174863	0.257321
BCAP29	9.44814	-0.555474	0.739932	-0.75071	0.452827	0.552119
SEC31B	314.736	0.980558	0.144373	6.79184	1.1071e-11	5.96225e-11
SART3	948.94	-0.541351	0.0971496	-5.57234	2.51334e-08	1.0341e-07
ARHGAP15	1.1327	-1.00342	2.09423	-0.479136	0.631842	0.714645
TUBA3D	19.7671	0.493757	0.472637	1.04469	0.296168	0.395378
PAX2	0.928787	3.484	2.58772	1.34636	0.178186	0.261108
EXOSC7	482.088	0.0408017	0.175886	0.231977	0.816556	0.866188
KIFAP3	1003.89	0.551014	0.0883672	6.2355	4.50328e-10	2.14825e-09
MKRN2	447.469	0.229212	0.122755	1.86724	0.0618687	0.104549
MCM6	1018.99	-1.64878	0.109076	-15.1159	1.27154e-51	2.99419e-50
REXO2	982.538	0.499091	0.154642	3.22739	0.00124925	0.00300309
RBM7	505.728	0.204432	0.116209	1.75918	0.0785471	0.129004
RBMS2	1529.11	0.346797	0.0823525	4.21113	2.54098e-05	7.67679e-05
BAZ2A	1722.41	-0.330341	0.0997652	-3.31119	0.00092901	0.00227465
PTPN23	916.594	-0.341395	0.0962981	-3.54519	0.000392337	0.00101881
MLH1	902.595	-0.815356	0.0931111	-8.75681	2.0085e-18	1.59893e-17
UNG	635.943	-1.42169	0.11708	-12.1429	6.25851e-34	9.35494e-33
FMO4	16.6642	-0.61062	0.517412	-1.18014	0.237943	0.331897
KLHL20	599.123	0.646907	0.116364	5.55936	2.70772e-08	1.11014e-07
RGS11	52.0953	1.58446	0.341682	4.63723	3.53102e-06	1.17686e-05
SLC46A1	42.4004	1.3132	0.343629	3.82156	0.000132612	0.00036663
PLXNA2	617.544	0.0126529	0.126271	0.100205	0.920182	0.94299
SPAG5	763.938	-4.09727	0.132006	-31.0385	1.63304e-211	2.91578e-209
ANKRD13A	606.523	-0.195292	0.113447	-1.72144	0.0851713	0.138428
TPD52	12.1629	-0.343877	0.681911	-0.504284	0.614062	0.699129
ACACB	79.8275	-0.610765	0.262799	-2.32407	0.0201215	0.0384849
TRAF4	1570.4	0.14559	0.108601	1.3406	0.180052	0.263178
PAG1	143.838	-1.22882	0.204432	-6.01089	1.84511e-09	8.37413e-09
GPATCH1	227.567	-0.592467	0.173101	-3.42267	0.000620099	0.00156111
ICAM3	0.559568	-2.47599	3.47188	-0.713154	0.47575	0.573782
NT5C2	718.803	0.204913	0.131843	1.55422	0.120132	0.187089
MCAM	974.802	0.891504	0.101695	8.76641	1.84447e-18	1.47123e-17
GPC4	5940.67	1.12597	0.06442	17.4786	2.08441e-68	6.60186e-67
MBNL3	125.357	-1.82254	0.262503	-6.94294	3.84016e-12	2.1404e-11
CAMSAP3	42.7622	0.0402339	0.353906	0.113685	0.909487	0.93569
RAP1GAP	71.4494	0.994003	0.284649	3.49203	0.000479373	0.00122968
XAB2	731.873	-0.204144	0.099959	-2.04227	0.0411244	0.0729226
ARHGEF1	1294.88	-0.241811	0.099371	-2.43341	0.0149573	0.0295006
STXBP2	14.6172	0.647825	0.590873	1.09639	0.27291	0.369859
MAP2K7	464.523	0.0422297	0.125938	0.33532	0.737383	0.803447
NMRK2	1.7013	0.842797	1.8497	0.455639	0.648649	0.728654
DGKD	967.192	0.323554	0.0925436	3.49623	0.000471881	0.00121162
CTTNBP2	51.6256	-0.745826	0.317462	-2.34934	0.0188068	0.0361967
ACTL6B	3.40648	-0.741792	1.45531	-0.509714	0.610252	0.695718
RARB	43.3942	-0.20289	0.327769	-0.619003	0.535914	0.630433
TOP2B	3735.69	-0.657732	0.0760706	-8.64634	5.31769e-18	4.13603e-17
TM9SF3	5666.64	-0.00807099	0.0815078	-0.0990211	0.921122	0.943775
NFKB2	644.537	0.368365	0.101966	3.61261	0.000303127	0.000798508
UBE2T	456.517	-2.6173	0.144863	-18.0674	5.75367e-73	1.9933e-71
PPP1R12B	340.207	0.0915625	0.164331	0.557182	0.577403	0.666879
DNAJC10	3948.17	0.450492	0.0786676	5.72653	1.02507e-08	4.36917e-08
GTF3C1	2354.5	-0.479381	0.0764262	-6.27246	3.55377e-10	1.71137e-09
IL4R	753.775	-0.0490755	0.109191	-0.449448	0.653109	0.732413
USP33	1335.29	-0.422883	0.096323	-4.39026	1.13214e-05	3.55939e-05
PAK3	434.368	-0.310093	0.178786	-1.73444	0.0828399	0.135071
CAPN6	70.6236	5.14023	0.488231	10.5283	6.39924e-26	7.25575e-25
DCX	37.9687	-2.55528	0.435771	-5.86383	4.5232e-09	1.98308e-08
SNRPA	700.388	-1.08079	0.127068	-8.5056	1.80657e-17	1.37357e-16
SPAG6	0	NA	NA	NA	NA	NA
EXOSC5	233.958	-0.200965	0.162059	-1.24007	0.214949	0.304595
DYNC1I2	3751.64	-0.16859	0.0680782	-2.47641	0.013271	0.0264508
APBB1IP	1.80831	-0.565463	1.63919	-0.344965	0.730121	0.798157
LRCH4	154.801	-0.267034	0.210109	-1.27093	0.203754	0.291341
FAM76B	493.294	-0.48454	0.122457	-3.95681	7.59576e-05	0.000216709
SIRT6	330.38	-0.297499	0.142922	-2.08155	0.0373834	0.067013
TYR	18.6607	4.59291	0.806192	5.69705	1.21898e-08	5.16455e-08
POLD3	476.552	-2.04263	0.131611	-15.5202	2.53302e-54	6.33177e-53
ACTN2	54.2193	-0.811114	0.308943	-2.62545	0.00865351	0.017886
CAPZB	4813.98	0.388337	0.0739461	5.25163	1.50761e-07	5.7602e-07
GPR137B	308.326	0.920924	0.143002	6.43993	1.19532e-10	5.9906e-10
NAALAD2	85.5049	-0.539297	0.249452	-2.16193	0.0306235	0.0562163
JADE1	1119.51	-0.208838	0.0903407	-2.31168	0.0207955	0.0396766
SLC25A43	238.704	0.294352	0.150732	1.95282	0.0508415	0.0880674
UBE2A	1600.27	-0.0910506	0.0924073	-0.985319	0.324467	0.425569
FGFR1	4441.95	-0.156093	0.0674049	-2.31575	0.0205718	0.0392775
FKBP6	0.321385	0.289562	3.92199	0.0738303	0.941145	NA
SMC1B	5.50719	1.68329	1.02927	1.63541	0.101963	0.161865
FBLN1	3805.05	0.935891	0.0769508	12.1622	4.94093e-34	7.41276e-33
ITGA8	33.9485	-0.0421399	0.384246	-0.109669	0.912672	0.937488
CST7	0.890778	-3.13877	2.66384	-1.17829	0.238681	0.332627
MAP2	2413.37	0.676253	0.0971582	6.96033	3.39474e-12	1.89937e-11
PIAS2	625.246	-0.127343	0.102294	-1.24487	0.213179	0.302602
AMPH	858.236	0.055903	0.0922221	0.606178	0.544396	0.637963
ARAF	692.243	0.312393	0.0967686	3.22825	0.0012455	0.00299539
MCCC1	201.338	-0.0436071	0.159615	-0.273202	0.784698	0.840238
LAMP3	118.535	3.74238	0.280294	13.3516	1.15894e-40	2.09927e-39
FAP	28.1353	1.70249	0.428981	3.96869	7.2269e-05	0.000206912
NEBL	165.416	-1.05728	0.177464	-5.9577	2.55818e-09	1.14568e-08
ACER3	636.698	-0.428762	0.101658	-4.21767	2.46835e-05	7.46433e-05
UBE2K	2518.62	-0.477867	0.0693354	-6.89211	5.49707e-12	3.03076e-11
PIK3C3	1653.28	0.641984	0.0812246	7.9038	2.70518e-15	1.82533e-14
N4BP2	676.737	-0.956586	0.124695	-7.67143	1.70092e-14	1.09452e-13
TIGAR	268.662	0.521518	0.144273	3.6148	0.000300584	0.000792196
TULP3	849.119	0.214759	0.109148	1.96759	0.0491147	0.0855048
SYNJ2	879.803	-0.975867	0.112914	-8.64256	5.49666e-18	4.26503e-17
ADCY2	310.9	1.82146	0.15596	11.679	1.63125e-31	2.25378e-30
PPP2R5C	1860.79	-0.302175	0.0761919	-3.96598	7.30952e-05	0.000209093
RBFOX1	20.2561	-0.441416	0.51408	-0.858652	0.390532	0.493117
GNB1	9673.75	0.0396238	0.0735826	0.538494	0.590236	0.678516
HOXA9	76.316	-0.421975	0.255169	-1.65371	0.0981867	0.156744
EDN1	720.235	1.00634	0.106349	9.46263	3.00281e-21	2.7272e-20
MLLT10	970.643	-0.22811	0.126866	-1.79804	0.0721711	0.119865
ZCWPW1	43.7283	0.810848	0.327955	2.47244	0.0134195	0.0267212
ADCYAP1R1	58.3257	-2.76003	0.349158	-7.90483	2.68293e-15	1.81181e-14
FGF20	0.483405	-2.24444	3.679	-0.610066	0.541818	NA
P2RY10	0	NA	NA	NA	NA	NA
ITM2A	126.976	0.354109	0.203082	1.74367	0.0812161	0.132756
NRDC	2415.16	-0.0846765	0.0748411	-1.13142	0.257879	0.354012
VDAC3	1862.41	-0.756786	0.0768252	-9.85075	6.80335e-23	6.76919e-22
PCM1	2479.35	-0.686386	0.0922759	-7.43841	1.01905e-13	6.23884e-13
TNRC6C	388.711	-0.449522	0.121359	-3.70406	0.000212174	0.000571804
CBFA2T2	588.869	-0.177376	0.110804	-1.60081	0.10942	0.17244
BRINP1	89.498	1.20406	0.256341	4.6971	2.63884e-06	8.91206e-06
ITCH	1647.77	-0.010429	0.0951011	-0.109662	0.912677	0.937488
PKD2L2	5.47664	-1.69265	1.06192	-1.59395	0.110948	0.174543
TP53INP2	923.662	1.1252	0.0954135	11.7929	4.24661e-32	5.99991e-31
SDF4	3499.71	0.588016	0.0766008	7.67637	1.63658e-14	1.05437e-13
MYH7B	27.9292	-0.27198	0.398076	-0.683236	0.494457	0.591645
BPIFB2	0	NA	NA	NA	NA	NA
TP73	2.27616	0.337004	1.63611	0.205979	0.836808	0.882772
TOLLIP	1044.93	0.573713	0.0964947	5.94554	2.75547e-09	1.22828e-08
UBE2D4	102.74	1.09276	0.237569	4.59975	4.23006e-06	1.39553e-05
CLUL1	11.7826	1.1963	0.675424	1.77118	0.0765314	0.126114
RUNX1T1	25.7114	0.82111	0.454379	1.8071	0.0707463	0.117848
CDH17	4.84	0.185166	0.964277	0.192026	0.847722	0.890137
THOC1	724.294	-0.317181	0.108795	-2.91539	0.00355244	0.00791553
FKBP7	468.9	0.551789	0.124573	4.42945	9.44758e-06	2.99809e-05
OSBPL6	346.824	-1.07666	0.139217	-7.73367	1.04493e-14	6.80756e-14
SLC1A3	1309.3	0.371262	0.0894516	4.15043	3.31855e-05	9.89718e-05
XRCC5	6459.52	-0.994283	0.0627541	-15.8441	1.54378e-56	4.00052e-55
LXN	58.3059	-0.294684	0.300828	-0.979577	0.327295	0.428482
SP140	40.1445	-4.92341	0.631742	-7.79339	6.52357e-15	4.30174e-14
MKNK1	193.027	0.372578	0.167772	2.22074	0.0263683	0.0491322
TNS1	2320.08	1.42204	0.0947608	15.0066	6.64684e-51	1.53624e-49
REXO1	563.535	-0.141754	0.11259	-1.25902	0.208023	0.296487
SAR1A	3614.08	0.56998	0.0721522	7.89969	2.79588e-15	1.8834e-14
CDC14A	101.203	-0.690033	0.225675	-3.05764	0.00223085	0.00516338
RAPGEF3	228.38	1.94079	0.162467	11.9457	6.83346e-33	9.92226e-32
CEACAM1	4.52699	-0.07443	1.12367	-0.0662385	0.947188	0.963073
SENP1	376.484	-0.88043	0.131888	-6.67557	2.46273e-11	1.29622e-10
DUSP13	0.440246	-2.1243	3.41573	-0.621916	0.533997	NA
CIC	1458.09	-0.453972	0.107424	-4.22599	2.37896e-05	7.20338e-05
LIPE	70.1088	-0.749417	0.304175	-2.46377	0.0137486	0.027309
FDFT1	3713.4	-0.654637	0.0721428	-9.07418	1.14538e-19	9.69275e-19
PAFAH1B3	313.516	-0.795729	0.195446	-4.07135	4.67411e-05	0.000136912
OPHN1	291.63	1.05452	0.182959	5.76372	8.22803e-09	3.53581e-08
AFM	0.801689	-0.233953	2.38848	-0.0979503	0.921972	0.944467
KIF22	834.678	-3.58791	0.11911	-30.1227	2.44714e-199	3.716e-197
SCGN	2.20414	4.73327	2.00397	2.36194	0.0181795	0.0351226
CARMIL1	241.862	0.318538	0.168163	1.89422	0.0581952	0.0991474
PGM1	395.993	0.999706	0.128743	7.76514	8.15557e-15	5.34106e-14
DDX1	3304.3	-0.395521	0.0772651	-5.11901	3.07143e-07	1.13782e-06
DNM2	2856.02	-0.0307228	0.0698148	-0.440061	0.659893	0.738273
EPB41L2	1049.78	-1.08036	0.0885547	-12.1999	3.11291e-34	4.68755e-33
RIMS1	89.4653	3.83676	0.315263	12.17	4.48917e-34	6.74122e-33
MOXD1	208.559	0.839707	0.160305	5.23818	1.6217e-07	6.17372e-07
STX7	1389.97	0.524643	0.0950035	5.52235	3.34487e-08	1.35994e-07
RABL2B	763.018	0.5615	0.102458	5.48029	4.2462e-08	1.71239e-07
KEAP1	1084.28	0.33896	0.107872	3.14223	0.00167664	0.00394868
DDX43	0	NA	NA	NA	NA	NA
PTPRH	9.67493	-2.28396	0.775429	-2.94542	0.00322521	0.00724101
DCT	1.02387	1.27257	2.36137	0.53891	0.589949	0.678282
SLC35C2	889.134	0.519856	0.0945023	5.50099	3.77655e-08	1.52869e-07
CRYBG3	176.154	-0.810592	0.20105	-4.0318	5.53515e-05	0.000160742
EPHA6	5.35413	-0.31759	0.955513	-0.332377	0.739605	0.805058
SCTR	0.318933	0.289562	3.93331	0.0736178	0.941315	NA
RFX3	434.113	-0.382872	0.161838	-2.36578	0.0179924	0.0347858
RIF1	2042.58	-0.837383	0.10632	-7.87604	3.37929e-15	2.26326e-14
RAB21	1281.84	-0.0986965	0.0900163	-1.09643	0.272891	0.369859
SLC4A4	45.2474	-0.477288	0.334063	-1.42874	0.15308	0.229939
SMARCA2	723.962	0.665987	0.105554	6.30942	2.8008e-10	1.36046e-09
RDH8	0.139892	-0.67222	4.08047	-0.164741	0.869148	NA
SESN1	328.002	-0.140699	0.149666	-0.940089	0.347172	0.45008
MID2	185.478	0.146299	0.189487	0.772075	0.44007	0.54005
DNAAF6	0	NA	NA	NA	NA	NA
COL5A3	378.321	-1.07627	0.132599	-8.11667	4.79139e-16	3.36287e-15
SRCAP	39.0951	-0.312615	0.372603	-0.839003	0.401468	0.50371
PUM3	1350.53	-0.751212	0.0846762	-8.87159	7.21105e-19	5.85826e-18
CPB2	1.79228	-0.460326	1.7501	-0.263028	0.792529	0.84706
CHRNA3	18.3169	-2.51382	0.612387	-4.10495	4.04403e-05	0.000119338
KCNN2	4.94913	-0.133646	1.07654	-0.124144	0.901202	0.930169
CNOT4	441.58	-0.183639	0.116674	-1.57395	0.1155	0.180741
PSEN1	1427.16	0.338897	0.0854025	3.96823	7.2408e-05	0.000207274
CPOX	537.618	-0.257739	0.115709	-2.22747	0.0259156	0.0483663
CLDND1	1469.56	-0.278184	0.0830979	-3.34767	0.000814952	0.00201428
MOK	132.445	0.294606	0.196989	1.49554	0.134773	0.206411
HSP90AA1	23309.9	-1.196	0.0633839	-18.8692	2.04396e-79	7.92606e-78
RBL1	307.034	-3.07653	0.171412	-17.9482	4.96043e-72	1.6791e-70
DLGAP4	1255.74	-0.165535	0.084496	-1.95908	0.0501029	0.0870014
IGSF9B	153.186	-0.288629	0.215701	-1.3381	0.180864	0.26427
CFHR2	0	NA	NA	NA	NA	NA
NDC80	598.577	-4.68719	0.1708	-27.4426	8.50889e-166	8.86233e-164
AP4E1	380.589	-0.0703371	0.123993	-0.567265	0.570534	0.660542
RSBN1	395.153	-0.793059	0.123405	-6.4265	1.30578e-10	6.51498e-10
MAGI3	360.336	-0.834997	0.134958	-6.18707	6.1292e-10	2.89498e-09
CXCL2	16.4597	-1.29814	0.553958	-2.3434	0.0191091	0.0366916
AFP	45.0877	-1.0562	0.356263	-2.96466	0.00303018	0.00682579
COL4A4	8.22917	1.2671	0.80076	1.58237	0.113566	0.178092
TCF7	115.705	0.317263	0.202083	1.56997	0.116423	0.181959
OSTM1	1510	0.661873	0.0841777	7.86281	3.75619e-15	2.50853e-14
CDH7	10.0565	-0.136296	0.66456	-0.205091	0.837501	0.883044
IMPG2	19.7903	0.453074	0.520348	0.870713	0.383911	0.48706
PCNP	3508.17	-0.279468	0.0830034	-3.36694	0.00076006	0.00188945
EXD2	606.091	0.421308	0.104592	4.02812	5.62247e-05	0.000163016
ARG2	111.495	0.777629	0.213206	3.64731	0.000265001	0.000704358
MEF2C	236.337	-0.67431	0.168522	-4.00132	6.29901e-05	0.000181626
PTPRC	1.54512	0.58265	1.70987	0.340757	0.733286	0.800529
CACNA1S	0.741004	3.15826	2.58697	1.22083	0.222149	0.31316
PKP1	0.716165	3.1157	3.16634	0.984006	0.325112	0.426037
UBA5	997.785	-0.100663	0.0896632	-1.12268	0.261575	0.357659
STK17B	1071.51	-0.886669	0.0901081	-9.84006	7.56664e-23	7.51484e-22
CDC14B	532.09	-0.0354326	0.117246	-0.302206	0.762495	0.8233
ZNF510	233.747	-0.250433	0.157754	-1.58749	0.112401	0.176566
LRP2	50.7522	-1.61887	0.356725	-4.53815	5.67507e-06	1.84787e-05
ZNF506	180.407	-0.0174592	0.169098	-0.103249	0.917765	0.940989
JMJD4	47.6264	0.419712	0.360235	1.16511	0.243976	0.338611
DUSP12	457.076	-0.691475	0.118427	-5.83883	5.25678e-09	2.29602e-08
AACS	551.222	0.669339	0.116401	5.75027	8.90991e-09	3.81672e-08
DELE1	896.225	0.130068	0.0999457	1.30138	0.193128	0.278359
SLC13A1	0	NA	NA	NA	NA	NA
CADPS2	295.078	1.70592	0.155344	10.9815	4.68813e-28	5.7882e-27
PCDHB4	27.0752	0.0815692	0.427414	0.190844	0.848648	0.890809
PCDHA6	148.469	-0.451201	0.21897	-2.06057	0.0393445	0.0700953
PCDHGA2	4.848	-2.98012	1.20254	-2.47817	0.0132056	0.0263432
HSPB11	571.593	-0.594555	0.121459	-4.89512	9.82471e-07	3.46724e-06
PHLPP1	260.212	-1.03131	0.15104	-6.8281	8.60471e-12	4.68158e-11
ATP8B1	124.289	1.80763	0.24297	7.43972	1.009e-13	6.18548e-13
IL12RB2	9.43591	0.0351271	0.73047	0.0480883	0.961646	0.973046
SMARCD3	618.127	0.699691	0.106281	6.58343	4.59702e-11	2.37044e-10
WDR70	504.636	-0.131881	0.117838	-1.11918	0.263065	0.359244
FYB1	0.150177	-0.67222	4.08047	-0.164741	0.869148	NA
MPP4	169.174	-2.72277	0.217825	-12.4998	7.48342e-36	1.18857e-34
STRADB	645.038	-0.23413	0.106851	-2.19118	0.0284385	0.0526095
BZW1	5174.94	-0.965956	0.0740243	-13.0492	6.4242e-39	1.09874e-37
PGR	15.9153	5.71361	1.13995	5.01217	5.38202e-07	1.94803e-06
C1QTNF3	177.365	3.01735	0.218255	13.8249	1.80291e-43	3.44631e-42
ME2	1048.73	-0.702056	0.0937585	-7.48791	6.99765e-14	4.33796e-13
C5orf22	722.47	-0.279545	0.108222	-2.58308	0.00979231	0.0200284
CCNT2	1178.93	-0.351284	0.103299	-3.40066	0.000672242	0.00168428
FAM135A	293.279	-0.422974	0.142172	-2.97509	0.00292904	0.00660896
COL19A1	8.54266	0.822291	0.761658	1.07961	0.280318	0.377944
EPB41L3	599.588	-0.702339	0.115857	-6.06215	1.34317e-09	6.16492e-09
COBLL1	159.772	-0.39118	0.18583	-2.10505	0.0352873	0.0637266
DLG3	525.733	-0.0959805	0.106904	-0.89782	0.369282	0.472448
KCNK2	38.252	-0.267571	0.360669	-0.741874	0.458164	0.557287
SERTAD4	390.359	0.909262	0.145423	6.25253	4.03869e-10	1.93685e-09
TRAF5	921.036	1.70968	0.105524	16.2018	4.89927e-59	1.3515e-57
MRPL22	421.553	-0.271049	0.141652	-1.91348	0.0556869	0.0953827
GEMIN5	701.904	-1.03927	0.107207	-9.69404	3.19617e-22	3.06923e-21
OPRK1	18.5347	-1.6261	0.66107	-2.4598	0.0139014	0.0275754
NFE2L1	7704.13	0.910892	0.0740098	12.3077	8.2313e-35	1.27495e-33
SEMA5B	34.5818	-2.35271	0.467186	-5.03592	4.75566e-07	1.72902e-06
GSK3B	2084.92	-0.460499	0.082455	-5.58486	2.33895e-08	9.66265e-08
ITGB5	2182.02	1.19757	0.0739059	16.204	4.72131e-59	1.30462e-57
ERC1	1017.77	0.103293	0.104813	0.985501	0.324378	0.425486
XPO1	4900.81	-1.045	0.0768834	-13.592	4.46524e-42	8.34881e-41
RNF13	564.281	0.63494	0.107918	5.88352	4.01622e-09	1.76892e-08
TRPM3	14.6193	1.31877	0.561255	2.34968	0.0187894	0.0361676
PALB2	291.847	-0.928662	0.146612	-6.33417	2.38628e-10	1.16433e-09
DOP1A	278.492	0.147257	0.191156	0.770352	0.441091	0.541098
LYRM2	813.146	-0.277203	0.0923119	-3.0029	0.00267422	0.00607788
BCKDHB	366.182	0.403024	0.132719	3.03667	0.00239209	0.00550519
KAT6A	1083.48	-0.874109	0.110172	-7.93401	2.12186e-15	1.44554e-14
TUT7	511.665	0.32575	0.115491	2.82058	0.00479376	0.0104213
ULK2	783.469	0.31376	0.108358	2.89557	0.00378468	0.00838129
GRHL2	1.30699	-2.50377	2.45027	-1.02183	0.30686	0.406809
TNPO1	5378.25	-0.702502	0.0748411	-9.38659	6.19754e-21	5.53893e-20
PLOD1	4803.81	1.355	0.0701991	19.3022	5.15e-83	2.10244e-81
P2RX5	4.02959	0.755132	1.12707	0.669997	0.50286	0.599755
ITGAE	400.511	0.0783277	0.178266	0.439388	0.660381	0.738666
DIS3	1379.96	-0.229485	0.0836147	-2.74455	0.00605937	0.0129101
PIBF1	354.784	0.194381	0.136128	1.42793	0.153311	0.230179
TDRD3	298.526	0.310998	0.140933	2.20671	0.0273343	0.0507633
NUFIP1	262.463	-0.843771	0.156053	-5.40697	6.4101e-08	2.5409e-07
PDS5B	1060.4	-0.717405	0.108845	-6.59107	4.36661e-11	2.2552e-10
OXCT1	1598.56	0.676153	0.0844538	8.00619	1.18319e-15	8.14593e-15
RRAGB	416.487	0.799152	0.125086	6.38882	1.6717e-10	8.27349e-10
EPYC	1.56036	2.14495	1.87526	1.14381	0.252701	0.34831
CYLD	580.982	0.570524	0.108837	5.24198	1.58865e-07	6.05498e-07
SLC27A5	64.3307	0.810627	0.279862	2.89653	0.0037732	0.00836042
ZNF324	219.673	0.142364	0.169842	0.838214	0.40191	0.50411
ZNF671	94.3825	0.405613	0.244929	1.65605	0.0977123	0.156078
ZNF416	101.985	0.212782	0.231548	0.918954	0.35812	0.460889
ZNF586	167.76	-0.225411	0.198986	-1.1328	0.257299	0.353418
ZNF446	47.7767	0.24994	0.321706	0.77692	0.437206	0.537631
ZNF264	405.667	0.207174	0.124922	1.65843	0.0972314	0.155448
RPS5	9947.37	0.474336	0.0763734	6.21075	5.27332e-10	2.50236e-09
FAT1	6622.81	-0.0116737	0.101195	-0.115359	0.908161	0.934741
YTHDC1	1650.76	-0.378407	0.0856284	-4.41917	9.90795e-06	3.13138e-05
CHMP2B	731.549	-0.0153186	0.104024	-0.147259	0.882927	0.916862
SMAP2	536.08	-0.185538	0.109041	-1.70154	0.0888408	0.143488
PPIE	760.508	0.00560207	0.108522	0.0516217	0.95883	0.971082
ZMPSTE24	1710.53	-0.0513744	0.0897149	-0.57264	0.566888	0.657679
STARD7	2405.72	-0.621237	0.0751177	-8.27018	1.33754e-16	9.72362e-16
NOA1	548.067	0.789856	0.127349	6.2023	5.56443e-10	2.63435e-09
REST	1529.35	-0.276915	0.101658	-2.72399	0.00644983	0.0136579
HAL	4.33834	-1.57003	1.07265	-1.4637	0.143277	0.217607
SSH1	2148.02	0.374838	0.111283	3.36833	0.000756242	0.00188054
GSTP1	11350.3	0.591325	0.096185	6.14779	7.8572e-10	3.68757e-09
APLP2	18773.7	0.41982	0.0661011	6.35119	2.13658e-10	1.04627e-09
FAM234B	214.095	-0.47527	0.172693	-2.75211	0.00592119	0.0126389
SLCO1A2	9.44399	-0.881888	0.867102	-1.01705	0.309129	0.409316
WBP11	1696.94	-1.07257	0.0781306	-13.7279	6.90857e-43	1.30524e-41
EIF3I	2669.56	0.000390175	0.0809869	0.00481776	0.996156	0.997199
NKAIN1	195.248	-3.38717	0.213415	-15.8713	1.00183e-56	2.61281e-55
COL16A1	577.625	1.06897	0.119416	8.95163	3.50287e-19	2.892e-18
TXLNA	1495.73	0.3331	0.0904811	3.68143	0.00023193	0.000620823
APOB	9.02517	1.29812	0.789038	1.6452	0.0999288	0.159087
NCOA1	684.497	-0.0712027	0.141551	-0.503017	0.614953	0.699947
AGBL5	616.596	0.168628	0.10859	1.55289	0.120449	0.187512
EFR3B	639.053	-0.784102	0.114881	-6.82535	8.77114e-12	4.76315e-11
KIF3C	1469.62	0.412778	0.0804915	5.12823	2.92486e-07	1.08624e-06
RAB10	3593.82	-0.1483	0.0825902	-1.79562	0.0725557	0.120393
GCKR	5.14147	-0.591605	1.16586	-0.507439	0.611847	0.697243
HADHA	3757.92	0.0619334	0.0692512	0.894329	0.371146	0.474385
MAPRE3	380.877	0.624411	0.129103	4.83652	1.32131e-06	4.59319e-06
CAD	2064.43	-0.520049	0.0929271	-5.59631	2.18963e-08	9.0735e-08
CD59	2475.46	-0.419346	0.0851526	-4.92464	8.45163e-07	2.99764e-06
CD82	597.102	-0.479374	0.131662	-3.64094	0.000271645	0.000720013
BCORL1	389.774	0.364051	0.122293	2.97688	0.00291196	0.00657406
ATRX	2213.3	-0.294585	0.113414	-2.59744	0.00939224	0.0192878
AK6	287.013	-0.521721	0.157288	-3.31698	0.000909972	0.00222938
FCN1	1.04163	-3.36425	2.28455	-1.47261	0.140857	0.214352
MYNN	309.582	-0.0227738	0.150751	-0.151069	0.879921	0.914875
MECOM	23.1516	-1.93065	0.515468	-3.74544	0.000180078	0.000489445
SCAMP1	1141.24	0.297987	0.0984012	3.02829	0.00245945	0.00564257
PREP	812.703	-0.516405	0.0990015	-5.21613	1.82697e-07	6.91467e-07
HACE1	432.824	0.140062	0.131457	1.06546	0.286669	0.384942
SEH1L	701.895	-0.577521	0.100395	-5.75249	8.7938e-09	3.77196e-08
WDR47	612.33	-0.0854621	0.115548	-0.739624	0.459528	0.558612
WDFY1	1262.41	-0.495834	0.0887679	-5.58574	2.32714e-08	9.62121e-08
OVGP1	70.6559	0.29665	0.264021	1.12359	0.261188	0.357221
SLC25A24	1810.16	-0.00297885	0.101437	-0.0293665	0.976572	0.983046
MAP3K4	816.636	-0.797532	0.0985745	-8.09066	5.93444e-16	4.149e-15
PILRA	12.2172	0.580326	0.683104	0.849542	0.39558	0.497976
IGSF9	118.772	-2.24211	0.232829	-9.62984	5.98252e-22	5.64155e-21
ABCB1	9.11464	-2.62065	0.915692	-2.86194	0.00421063	0.00925142
ZNF213	236.61	-0.0484607	0.150389	-0.322235	0.747275	0.811558
AKR1B1	1172.08	-1.28276	0.0913496	-14.0423	8.58305e-45	1.68835e-43
CPNE3	1135.89	-0.187204	0.105361	-1.77678	0.0756046	0.124802
RRN3	1119.92	-0.75382	0.0885786	-8.51018	1.73667e-17	1.32166e-16
CTTN	7579.49	0.550475	0.0607426	9.06242	1.27592e-19	1.07527e-18
WNT11	37.5693	3.62259	0.494164	7.33074	2.28887e-13	1.37586e-12
MTIF2	625.212	-0.540547	0.107252	-5.03998	4.65578e-07	1.69422e-06
DDHD2	1216.1	0.0415826	0.0930324	0.446969	0.654897	0.733948
TTC39A	21.4881	0.198501	0.47448	0.418356	0.675687	0.752523
EPS15	1626.59	0.475049	0.10039	4.73204	2.22275e-06	7.55548e-06
ORC1	269.784	-4.82623	0.247784	-19.4775	1.70304e-84	7.09511e-83
MGST2	228.943	1.55214	0.171931	9.02771	1.75307e-19	1.46673e-18
CHERP	556.816	-0.662953	0.110485	-6.00041	1.96824e-09	8.91302e-09
ATG16L1	639.429	-0.16275	0.108071	-1.50596	0.132079	0.202894
USP40	658.348	0.164179	0.106929	1.53541	0.124684	0.193141
POMGNT1	1586	0.392643	0.0780893	5.02813	4.95292e-07	1.79792e-06
RAD54L	196.799	-4.0783	0.24233	-16.8295	1.48291e-63	4.36491e-62
MAST2	947.051	-0.406514	0.110532	-3.67779	0.000235267	0.000629444
DNAJA1	6219	-0.758687	0.0621948	-12.1986	3.16388e-34	4.75988e-33
B4GALT1	1267.65	-0.099547	0.0811691	-1.22642	0.220042	0.310648
CHMP5	1407.61	0.307935	0.0877291	3.51007	0.000447992	0.00115448
NFX1	1042.78	-0.15305	0.101885	-1.50219	0.133048	0.204094
AQP6	1.23186	-2.40292	2.08453	-1.15274	0.249017	0.344549
DIMT1	359.456	-0.624033	0.130395	-4.78573	1.7037e-06	5.86975e-06
IPO11	493.445	-1.00721	0.115284	-8.73673	2.39962e-18	1.89912e-17
FOLH1	6.82619	-1.66134	0.902856	-1.84009	0.0657549	0.110427
EIF2AK1	2400.78	0.111492	0.0709666	1.57105	0.11617	0.181669
NME8	4.80022	2.40484	1.11774	2.15153	0.0314346	0.0575362
EPDR1	904.308	1.02107	0.0929945	10.9799	4.77224e-28	5.88758e-27
SNX10	29.815	-1.33783	0.417681	-3.20299	0.00136008	0.00325122
SEPHS1	1617.55	-1.19366	0.0841181	-14.1902	1.05305e-45	2.1334e-44
MRPL28	1013.46	0.0271868	0.0979814	0.277469	0.78142	0.83772
HBQ1	8.00386	0.0438766	0.859772	0.0510329	0.959299	0.97148
ITPKC	349.465	0.631001	0.140045	4.50571	6.61516e-06	2.13812e-05
CEACAM6	0	NA	NA	NA	NA	NA
FAT2	212.723	2.52285	0.210318	11.9954	3.75553e-33	5.49729e-32
RBM22	1050.31	-0.476404	0.0922489	-5.16434	2.4129e-07	9.03336e-07
TMED2	4562	0.494843	0.0709447	6.97505	3.05752e-12	1.71364e-11
ERO1B	565.546	1.70704	0.112562	15.1653	5.99937e-52	1.42511e-50
ZFAND6	1276.86	0.227674	0.083446	2.72839	0.00636435	0.0134962
HSD17B2	0	NA	NA	NA	NA	NA
TXLNG	471.576	-0.725788	0.117926	-6.15462	7.52587e-10	3.53514e-09
PPEF1	24.9803	-1.70242	0.467231	-3.64363	0.00026882	0.000713575
LAT2	27.318	0.217889	0.420454	0.518224	0.604302	0.690485
HUWE1	5035.2	-0.464483	0.105058	-4.42121	9.81482e-06	3.10497e-05
ZW10	556.129	-0.966757	0.113905	-8.4874	2.11308e-17	1.60286e-16
ALG9	214.955	-0.00920321	0.163841	-0.0561717	0.955205	0.968497
MYBPC2	3.60881	2.8248	1.36309	2.07235	0.0382331	0.0683702
NOX4	1338.07	1.8543	0.0946213	19.5971	1.63773e-85	6.92964e-84
ACOX3	706.356	1.28231	0.102065	12.5637	3.34356e-36	5.35761e-35
MTMR2	1653.18	-0.562045	0.098427	-5.71028	1.12791e-08	4.78993e-08
PPP1R15A	1429.41	0.132176	0.0869371	1.52036	0.12842	0.198192
HSD17B14	296.579	1.48053	0.170739	8.67127	4.27336e-18	3.33976e-17
TRIP6	1353.18	0.212193	0.0971471	2.18424	0.0289443	0.053472
ACHE	141.194	0.545685	0.216146	2.52461	0.0115827	0.0233812
FTL	30435	0.700292	0.081723	8.56909	1.04309e-17	8.02467e-17
SRRT	2712.63	-0.803911	0.0706165	-11.3842	5.01358e-30	6.60135e-29
BAX	1680.01	0.206678	0.106349	1.94339	0.0519685	0.0897518
NLK	658.765	0.200621	0.105861	1.89513	0.0580747	0.0989924
PIGS	1357.07	0.799084	0.0942764	8.47597	2.33135e-17	1.76431e-16
ADAMTS2	241.502	-0.103372	0.164933	-0.62675	0.530823	0.625939
TMPRSS11E	0	NA	NA	NA	NA	NA
ATXN7L3	1526.78	0.0670257	0.082514	0.812295	0.416623	0.51856
PGS1	495.397	0.0045507	0.123851	0.0367434	0.97069	0.978638
PSMC5	1307.08	-0.478528	0.117686	-4.06615	4.77972e-05	0.000139778
UIMC1	468.796	-0.271153	0.1199	-2.26148	0.0237293	0.0446966
CETP	1.30944	-2.50375	2.4489	-1.0224	0.306593	0.406555
MMP2	7859.12	-0.51093	0.0662431	-7.71296	1.22934e-14	7.96421e-14
MT3	0.181493	1.25133	4.08047	0.306664	0.759099	NA
LPCAT2	754.349	-0.524306	0.116693	-4.49303	7.0217e-06	2.26277e-05
GNAO1	22.2896	0.597119	0.48618	1.22818	0.219378	0.309979
OGFOD1	871.065	-0.246239	0.0995057	-2.47463	0.0133375	0.0265671
SH3BP2	961.286	-0.226825	0.102747	-2.2076	0.0272718	0.0506646
NOP14	561.354	-0.55481	0.118398	-4.68598	2.78619e-06	9.37266e-06
ADD1	3928.35	0.115784	0.0645326	1.79419	0.0727829	0.120696
L2HGDH	229.352	-0.801638	0.172783	-4.63956	3.49153e-06	1.16513e-05
TXNDC16	297.045	-0.182826	0.186947	-0.977955	0.328096	0.429289
RTRAF	2354.96	0.101556	0.0944374	1.07538	0.282206	0.379985
NID2	91.5738	0.493701	0.235749	2.09418	0.0362439	0.06528
GMCL1	589.171	0.467378	0.115063	4.06194	4.8667e-05	0.000142143
SF3B2	3812.64	-0.363429	0.0767378	-4.73599	2.17993e-06	7.41768e-06
KLHL42	1003.7	-0.080619	0.101112	-0.797323	0.425263	0.5264
GNAS	19562.7	0.757938	0.0774593	9.78497	1.30629e-22	1.28013e-21
DNM1L	1857.9	-0.601021	0.0802259	-7.49161	6.80343e-14	4.22077e-13
PTHLH	90.3759	-2.12419	0.255129	-8.32596	8.3651e-17	6.14727e-16
PHACTR3	6.55796	-0.819058	0.88061	-0.930102	0.352318	0.45519
ERGIC2	801.211	-0.289005	0.121946	-2.36995	0.0177906	0.034449
TFAP2C	35.1839	-1.96926	0.409031	-4.81446	1.47597e-06	5.11771e-06
AURKA	995.831	-4.3072	0.123005	-35.0166	1.25908e-268	3.78842e-266
CASS4	10.4214	1.12153	0.66388	1.68935	0.0911516	0.146869
PIR	108.259	0.329998	0.220364	1.49751	0.13426	0.205721
AAMDC	108.158	1.75224	0.335805	5.21805	1.80817e-07	6.84669e-07
RFX2	261.655	0.366834	0.142284	2.57818	0.00993233	0.0202894
METTL2A	363.243	0.0279784	0.140118	0.199678	0.841733	0.885667
SULT2B1	1.45823	4.13897	2.11772	1.95444	0.0506488	0.0877991
ALG6	249.138	-0.63313	0.168867	-3.74928	0.000177343	0.000482334
CNOT3	905.606	-0.341274	0.0936442	-3.64437	0.000268047	0.000711638
GP6	3.61648	-0.249082	1.1064	-0.225129	0.821879	0.870414
PTPN4	296.823	-0.169849	0.143083	-1.18707	0.235202	0.328793
DDX18	2241.57	-0.885522	0.0846972	-10.4551	1.38787e-25	1.55411e-24
KHSRP	3996.95	-0.813596	0.0659013	-12.3457	5.14079e-35	8.00839e-34
GNA11	1003.59	0.0960572	0.112259	0.855672	0.392179	0.494571
ASAP3	732.546	0.0636311	0.097739	0.651031	0.515026	0.610774
EDEM2	395.526	0.524382	0.132004	3.97247	7.11326e-05	0.000203838
DNMT3B	240.064	-1.65466	0.160639	-10.3005	7.01236e-25	7.58062e-24
REM1	2.81544	2.45976	1.4849	1.65652	0.0976173	0.155957
TPX2	5252.68	-4.2492	0.0777516	-54.651	0	0
PDRG1	437.875	-0.0168034	0.117792	-0.142653	0.886564	0.919383
EPB41L1	623.685	-0.189827	0.10524	-1.80376	0.0712683	0.118596
SLC15A1	116.68	-0.131563	0.238335	-0.55201	0.580941	0.670067
DOCK9	918.853	-0.752941	0.109448	-6.87946	6.00806e-12	3.30688e-11
ANKRD10	2187.37	-0.298945	0.076105	-3.92806	8.56348e-05	0.000242869
TGDS	274.284	0.0970716	0.139066	0.698026	0.485161	0.582925
DOCK3	45.2439	-0.411072	0.347082	-1.18436	0.236269	0.329887
C3orf18	169.089	0.471728	0.189435	2.49018	0.0127677	0.0255417
COQ9	515.542	0.0256991	0.112384	0.228672	0.819124	0.86839
TMEM40	0.669395	0.225898	2.76145	0.0818044	0.934802	0.953818
KIF9	81.9083	-0.0606632	0.25407	-0.238766	0.811287	0.862402
ARHGAP28	292.44	0.438869	0.144556	3.03597	0.00239761	0.00551556
CRLS1	156.313	-0.0345004	0.250904	-0.137505	0.890632	0.922306
DEFB127	0	NA	NA	NA	NA	NA
PPP1R13B	157.007	0.414933	0.183006	2.26732	0.0233706	0.044108
ATRN	1514.41	0.164092	0.093257	1.75957	0.0784813	0.128922
SMOX	532.536	-0.534371	0.136529	-3.91397	9.07926e-05	0.00025669
SIGLEC1	0.161135	-0.67222	4.08047	-0.164741	0.869148	NA
FKBP1A	2687.78	-0.0424898	0.100595	-0.422387	0.672743	0.749758
NSFL1C	1557.4	-0.0534841	0.0959444	-0.557448	0.577221	0.666733
SLC4A11	33.2204	-0.309457	0.380857	-0.812528	0.416488	0.518433
C20orf194	972.79	0.89934	0.095586	9.4087	5.02307e-21	4.50413e-20
ZNF343	176.297	0.155074	0.18056	0.858851	0.390422	0.493108
EBF4	105.364	2.22412	0.230447	9.6513	4.85369e-22	4.6011e-21
CPXM1	2003.97	0.193148	0.0847646	2.27864	0.0226882	0.0429517
MAVS	2119.45	0.536101	0.0775962	6.90885	4.88591e-12	2.70113e-11
LZTS3	325.661	0.387923	0.132212	2.93409	0.00334522	0.00748872
F11	0	NA	NA	NA	NA	NA
XRN2	2209.37	-0.727196	0.0906011	-8.02635	1.00416e-15	6.93392e-15
KIZ	187.292	1.26513	0.168292	7.51746	5.58525e-14	3.49035e-13
DYNLL1	4600.25	0.238902	0.101861	2.34538	0.0190077	0.0365185
TESC	16.6969	1.6333	0.591593	2.76085	0.00576515	0.012335
SNX5	2641.34	-0.485072	0.0701477	-6.91501	4.67814e-12	2.59068e-11
RPL6	20251.7	0.405865	0.068648	5.91226	3.37448e-09	1.49437e-08
SIRPG	0.483405	-2.24444	3.679	-0.610066	0.541818	NA
MAPKAPK5	757.021	-0.147657	0.0976193	-1.51258	0.130385	0.20073
P2RX7	1.82066	0.569437	1.59357	0.357335	0.720841	0.79046
ESF1	680.451	-1.01681	0.109774	-9.26271	1.99314e-20	1.73644e-19
RBBP9	483.994	-1.03088	0.12031	-8.56855	1.04792e-17	8.05803e-17
ANAPC5	2333.09	0.276864	0.0795766	3.47921	0.000502887	0.00128514
SLC23A2	976.659	-0.344711	0.10014	-3.44228	0.000576826	0.00145917
SLC8B1	360.865	-0.00505777	0.136018	-0.0371845	0.970338	0.978585
TMEM230	1869.53	0.405817	0.0776887	5.22363	1.75452e-07	6.66063e-07
DZANK1	77.4922	-0.121598	0.248493	-0.489341	0.6246	0.708447
KDM2B	408.632	-1.2945	0.128896	-10.043	9.86412e-24	1.02084e-22
CFAP61	7.35278	-1.60495	0.867291	-1.85054	0.0642362	0.108133
LHX5	0.38047	2.19241	4.03381	0.543509	0.586779	NA
TASP1	183.439	0.307931	0.186547	1.65069	0.0988023	0.157498
OAS1	0.550769	2.73255	2.88285	0.947865	0.343198	0.445818
GCN1	3084.17	-0.0560374	0.0945131	-0.592907	0.553244	0.645815
RPLP0	28059.5	0.580671	0.067163	8.64569	5.34796e-18	4.15759e-17
PXN	849.667	-1.06327	0.110469	-9.62505	6.26769e-22	5.9002e-21
SIRT4	33.5183	1.17948	0.432203	2.729	0.00635261	0.0134748
RPH3A	3.95782	3.60761	1.48311	2.43247	0.0149964	0.029567
KIF16B	222.648	0.409607	0.169807	2.41219	0.015857	0.0310752
TRMT6	418.062	-0.945511	0.131553	-7.18729	6.60912e-13	3.87392e-12
CHGB	112.763	0.306117	0.223296	1.3709	0.170406	0.25182
PEBP1	3855.66	-0.120238	0.0869708	-1.38251	0.166815	0.247458
TBX5	0.190235	1.25133	4.08047	0.306664	0.759099	NA
BRAP	483.583	-0.131265	0.111421	-1.1781	0.238758	0.332653
ERP29	2242.26	0.891498	0.0896109	9.94854	2.55898e-23	2.59217e-22
NOS1	1.0423	-3.36484	2.24882	-1.49627	0.134584	0.206158
FUS	6399.55	-0.677668	0.0804768	-8.42066	3.74361e-17	2.79918e-16
IGBP1	578.107	1.09165	0.118132	9.24092	2.44382e-20	2.12111e-19
FXYD5	678.299	-0.480826	0.102003	-4.71385	2.43083e-06	8.24209e-06
ZNF302	572.482	-0.118308	0.103016	-1.14844	0.250787	0.346289
GRAMD1A	1327.11	0.644229	0.0858396	7.50503	6.14129e-14	3.82313e-13
FXYD3	0.179041	1.25133	4.08047	0.306664	0.759099	NA
HEPH	1295.84	1.58722	0.0857321	18.5137	1.60032e-76	5.8563e-75
CDIP1	827.881	0.326198	0.0991769	3.28905	0.00100527	0.00245104
CMTM1	20.1998	0.0824047	0.492926	0.167175	0.867233	0.905578
KCNH4	0.725971	3.13308	3.15159	0.994127	0.320161	0.420736
GANAB	9454.63	0.0581107	0.0707823	0.820978	0.411659	0.513878
GMIP	323.482	-0.0790505	0.13346	-0.592316	0.553639	0.646112
RBM41	481.141	-0.342209	0.11512	-2.97263	0.00295263	0.00665847
BIRC5	1138.45	-4.40173	0.125458	-35.0853	1.12975e-269	3.53003e-267
LAG3	28.4764	-0.281094	0.406395	-0.691678	0.48914	0.586578
MLF2	3611.58	-0.157309	0.0815378	-1.92928	0.0536966	0.0924023
OTUB2	86.3647	0.135243	0.266232	0.507988	0.611462	0.696902
DDX24	2635.43	-0.516469	0.0708607	-7.28851	3.1339e-13	1.86998e-12
ZBTB25	249.585	0.805695	0.147891	5.44791	5.0965e-08	2.04464e-07
NECAP1	365.742	-0.0703636	0.133174	-0.528357	0.597251	0.684209
ARHGAP4	20.6887	1.05858	0.534009	1.98233	0.0474424	0.0829221
ANKRD24	11.5335	3.32394	0.794325	4.18461	2.85653e-05	8.58227e-05
DHX32	373.248	-0.266059	0.124144	-2.14316	0.0321004	0.0586162
RCOR1	835.259	-0.0393495	0.109315	-0.359963	0.718875	0.788728
GPATCH2L	1006.8	-0.313865	0.103611	-3.02926	0.00245151	0.00562759
LTBP4	4221.02	0.933855	0.0735151	12.7029	5.69778e-37	9.31363e-36
BLVRB	487.035	0.957851	0.136392	7.0228	2.17465e-12	1.23372e-11
SLC9A1	753.52	0.0657788	0.115547	0.56928	0.569166	0.659379
SPTLC1	1927.53	0.0154391	0.0802055	0.192494	0.847356	0.88997
PAPOLA	3812.42	-0.554936	0.0745912	-7.43969	1.00921e-13	6.18548e-13
CCNK	219.894	-0.30775	0.18002	-1.70953	0.0873527	0.141407
PCBP4	784.833	0.520107	0.123722	4.20382	2.62447e-05	7.92164e-05
RGS1	2.1163	0.0919406	1.44818	0.0634871	0.949379	0.964757
YPEL3	247.483	1.37525	0.162359	8.47046	2.44426e-17	1.84546e-16
MRPS33	507.567	0.174016	0.120367	1.44572	0.148256	0.22374
NDUFB2	275.974	0.164573	0.23518	0.699774	0.484069	0.581996
NUDC	2706.44	-0.354199	0.107752	-3.28716	0.00101202	0.00246673
MAEA	1685.03	-0.199536	0.0757755	-2.63326	0.00845705	0.0175179
ICAM1	459.35	2.93109	0.138153	21.2163	6.76034e-100	3.5663e-98
STRN4	1746.43	-0.175544	0.0906444	-1.93662	0.0527914	0.0910278
IRAK3	9.02324	-2.59288	0.873436	-2.9686	0.00299159	0.00674353
LYZ	0	NA	NA	NA	NA	NA
SI	0	NA	NA	NA	NA	NA
MUL1	577.167	0.622747	0.106036	5.87299	4.2801e-09	1.88107e-08
TFAP4	167.962	-2.1729	0.192337	-11.2974	1.35215e-29	1.75758e-28
PDCD7	452.978	-0.359415	0.130409	-2.75605	0.00585044	0.012506
SPG21	1415.93	0.191015	0.0835437	2.28641	0.0222304	0.0421715
FETUB	0.279784	-1.47989	4.04603	-0.365764	0.714541	NA
DNAJB11	1816.79	1.30561	0.103719	12.588	2.45818e-36	3.94279e-35
P3H2	706.704	0.532025	0.1162	4.57852	4.68272e-06	1.538e-05
THPO	1.07022	2.51024	2.17763	1.15274	0.249017	0.344549
CHRD	21.7567	1.54673	0.492601	3.13992	0.00168995	0.00397658
FLT3LG	0.139892	-0.67222	4.08047	-0.164741	0.869148	NA
RAB11FIP3	1152.04	0.124929	0.088943	1.40459	0.160142	0.238802
GNPTG	826.34	1.28044	0.12814	9.99256	1.64277e-23	1.67767e-22
ZNF268	377.171	-0.10976	0.132835	-0.826287	0.408641	0.511171
GOLGA3	3293.28	1.12027	0.075776	14.784	1.85774e-49	4.16338e-48
PABPC4	2252.08	-0.249059	0.0825055	-3.0187	0.00253863	0.00579728
CD209	0	NA	NA	NA	NA	NA
CERS4	260.539	0.720495	0.14806	4.86623	1.13747e-06	3.98223e-06
MCOLN1	431.957	0.072097	0.121252	0.594606	0.552107	0.644859
USP48	1650.72	0.069158	0.0882565	0.783602	0.433273	0.533522
EFNB1	895.505	0.0797639	0.103124	0.77348	0.439239	0.539274
PDPR	693.213	-0.416611	0.11184	-3.72507	0.000195263	0.000527804
AARS1	3596.09	0.449842	0.0743153	6.05315	1.42039e-09	6.51567e-09
GLG1	5384.62	0.450003	0.0706266	6.37158	1.87087e-10	9.22546e-10
KIF4A	911.47	-4.78374	0.14195	-33.7002	5.74349e-249	1.55534e-246
TNRC6A	1868.65	-0.582001	0.0890538	-6.53539	6.34435e-11	3.23652e-10
PLEKHG2	2318.84	0.0225027	0.0851246	0.26435	0.79151	0.846249
DLL3	64.2927	-2.1052	0.373269	-5.6399	1.70145e-08	7.1232e-08
NAT14	1012.64	0.605996	0.12333	4.9136	8.94205e-07	3.16537e-06
PITPNM2	529.959	-1.56249	0.134384	-11.6271	3.00238e-31	4.12713e-30
EXOC1	518.434	0.0245379	0.109134	0.224841	0.822103	0.870594
RBM27	443.335	-0.478007	0.123706	-3.86405	0.000111522	0.000311501
POU4F3	2.69935	-0.998128	1.48181	-0.673589	0.500573	0.597554
OSBPL8	1975.28	-0.52313	0.111481	-4.69257	2.69793e-06	9.09459e-06
DTX2	166.028	-0.248864	0.205255	-1.21246	0.225335	0.317019
NLRC4	17.0036	0.725881	0.564423	1.28606	0.198422	0.284602
PUS7	687.844	-1.1279	0.108099	-10.4339	1.73534e-25	1.93122e-24
LAMB4	25.2359	0.858474	0.437499	1.96223	0.0497358	0.086484
NRCAM	166.749	-2.46063	0.222	-11.0839	1.50147e-28	1.89262e-27
LAMB1	19715.9	1.21436	0.0598379	20.2942	1.44688e-91	6.69767e-90
SLC26A4	5.00953	-1.54137	0.984894	-1.56501	0.117581	0.18368
SLC26A3	0.161135	-0.67222	4.08047	-0.164741	0.869148	NA
DLD	1891.49	-0.173501	0.0817873	-2.12137	0.0338909	0.0614781
WDR7	267.421	-0.214413	0.169589	-1.26431	0.206118	0.294263
TXNL1	1352.46	0.0163148	0.0851715	0.191553	0.848092	0.890341
IL5RA	1.09351	-2.20641	2.35987	-0.934975	0.349801	0.452766
ABCC6	24.5579	1.63062	0.52731	3.09235	0.00198582	0.00462987
CMTM6	1061.95	-0.37152	0.0855019	-4.34516	1.39172e-05	4.33027e-05
ITGA6	874.531	-2.80288	0.117426	-23.8694	6.37601e-126	4.50424e-124
RAPGEF4	11.0134	0.275702	0.665684	0.414163	0.678754	0.754801
MAP3K20	680.773	-0.899193	0.103738	-8.66789	4.402e-18	3.43699e-17
SMPX	0.725971	3.13308	3.15159	0.994127	0.320161	0.420736
FH	1376.18	-0.477258	0.0844408	-5.65199	1.58603e-08	6.65715e-08
SEL1L3	1151.56	1.45941	0.0939976	15.526	2.31217e-54	5.78862e-53
TF	29.3632	3.31371	0.502397	6.59581	4.22945e-11	2.18714e-10
CDV3	5998.4	0.00313347	0.0672689	0.0465812	0.962847	0.973944
MYO15A	15.3352	1.006	0.544383	1.84796	0.0646082	0.108659
ALKBH5	1289.02	0.181543	0.0908811	1.99759	0.0457613	0.0802688
APOH	13.7903	4.46446	0.899969	4.96068	7.02456e-07	2.51067e-06
NLRP1	29.2158	0.764476	0.396468	1.92821	0.0538284	0.0925605
PITPNM3	97.0441	-1.5915	0.250915	-6.34279	2.25639e-10	1.10261e-09
SPAG7	934.263	0.323236	0.1133	2.85293	0.00433181	0.00949072
ORC6	801.6	-3.7045	0.127639	-29.0233	3.34355e-185	4.17892e-183
ZFHX4	1153.42	-0.162014	0.100924	-1.6053	0.108428	0.17106
SLC17A6	3.71638	-2.01578	1.19847	-1.68196	0.0925766	0.148885
CPA1	6.29731	6.24569	1.4376	4.34453	1.39577e-05	4.34203e-05
ZC3HC1	374.477	-0.6047	0.153565	-3.93774	8.2254e-05	0.000233811
ESR1	29.7607	1.27629	0.552432	2.31031	0.0208711	0.039802
RGS17	131.326	-1.99943	0.214961	-9.30134	1.38681e-20	1.2213e-19
ANGPT2	6.23119	-2.22363	0.982247	-2.26382	0.0235853	0.0444552
TMEM101	468.164	0.590237	0.127653	4.62374	3.76877e-06	1.2525e-05
CD200	76.9662	0.373077	0.252753	1.47605	0.13993	0.213041
CCDC80	11139.4	0.442804	0.0693729	6.38295	1.73708e-10	8.58656e-10
CMA1	0.640766	-1.19178	3.04226	-0.391742	0.695249	0.768933
PSME1	569.83	0.100697	0.104264	0.965787	0.334151	0.435897
PPP2R3C	267.281	0.0244203	0.175609	0.139061	0.889402	0.921268
HAUS4	58.1634	-0.327879	0.315085	-1.0406	0.298059	0.397543
JPH4	559.027	1.85308	0.118828	15.5946	7.91884e-55	2.00102e-53
MYH7	13.2268	3.15622	0.846125	3.7302	0.000191326	0.000518196
CEBPE	0.290069	-1.52476	4.03808	-0.377594	0.705732	NA
SLC7A8	183.731	-0.400628	0.179478	-2.23218	0.0256033	0.0478384
OSGEP	642.715	-0.373042	0.109978	-3.39196	0.000693949	0.00173546
SLC22A17	1442.92	1.35811	0.0816654	16.6302	4.20942e-62	1.21699e-60
RNF31	12.8686	0.909227	0.652254	1.39398	0.163325	0.242912
SCFD1	1367.44	0.502896	0.0785896	6.39902	1.56376e-10	7.75853e-10
G2E3	821.701	-1.56507	0.130062	-12.0333	2.37518e-33	3.49565e-32
HECTD1	2465.49	-0.153016	0.0962599	-1.58961	0.111923	0.175877
HNRNPC	11130.7	-0.359114	0.059713	-6.01401	1.80988e-09	8.21925e-09
RPGRIP1	8.70836	-1.89451	0.872646	-2.17099	0.0299318	0.0551459
SUPT16H	3817.13	-1.37618	0.075605	-18.2023	4.95126e-74	1.76035e-72
TOX4	1129.07	0.390639	0.0867608	4.50249	6.71633e-06	2.16909e-05
GEMIN2	288.201	-0.766113	0.139792	-5.48038	4.24412e-08	1.71198e-07
TGM1	35.2086	-0.670585	0.414042	-1.61961	0.105317	0.166653
TINF2	607.968	0.0935192	0.115248	0.81146	0.417101	0.519061
DAZL	1.18287	-3.548	2.38056	-1.4904	0.136118	0.208195
TBL1Y	13.4376	-0.789069	0.619489	-1.27374	0.202755	0.290048
SEMA6A	428.369	0.206252	0.120042	1.71817	0.0857656	0.139227
TRPM7	888.956	-0.273229	0.123989	-2.20366	0.0275486	0.0511086
TYRO3	733.601	0.289717	0.10053	2.88188	0.00395306	0.00872089
WDR76	141.283	-2.89677	0.229064	-12.6461	1.17584e-36	1.9105e-35
CAPN3	7.16286	2.47971	0.987075	2.51219	0.0119986	0.0241428
SNAP23	350.645	0.480026	0.132134	3.63289	0.000280269	0.000741542
TBX15	90.514	1.06071	0.257557	4.11836	3.81583e-05	0.000113014
PHGDH	4694.68	0.797612	0.0644765	12.3706	3.77005e-35	5.89565e-34
COL9A3	1124.74	4.13053	0.131192	31.4847	1.40826e-217	2.60016e-215
EZR	1342.51	-1.55453	0.0907927	-17.1217	1.02225e-65	3.12798e-64
MYL6	7625.7	0.84933	0.355386	2.38988	0.0168539	0.0328151
AGO1	1454.45	-0.551721	0.0887994	-6.21312	5.1944e-10	2.46708e-09
TEKT2	17.9045	-0.596692	0.513387	-1.16227	0.245128	0.339977
CLSPN	633.618	-6.2099	0.240435	-25.8277	4.33017e-147	3.9087e-145
RFFL	102.753	0.783473	0.244369	3.20611	0.00134543	0.00321763
UNC13D	18.7127	2.07218	0.552214	3.75249	0.00017509	0.000476653
MFSD11	238.789	0.582816	0.153656	3.79298	0.000148849	0.00040936
DPYSL2	3055.66	0.152316	0.0689893	2.20782	0.0272567	0.0506423
TGFB2	4724.92	0.339009	0.0869394	3.89938	9.64412e-05	0.000271479
GPATCH2	313.826	-0.481177	0.13923	-3.45599	0.000548272	0.00139106
NUP50	1967.62	-1.37398	0.0766548	-17.9243	7.6194e-72	2.55329e-70
CDC45	301.556	-4.99556	0.24272	-20.5815	4.01882e-94	1.94919e-92
COMT	22.6128	-0.900389	0.449705	-2.00218	0.0452657	0.079468
ADA2	78.0533	-0.264447	0.260593	-1.01479	0.310206	0.410542
VNN3	0	NA	NA	NA	NA	NA
ECHDC1	1119.08	-0.704102	0.0862691	-8.16169	3.30366e-16	2.34094e-15
LRRFIP2	1246.06	-0.497577	0.0881825	-5.64258	1.67517e-08	7.01681e-08
SEC22C	1000.96	-0.334433	0.0901716	-3.70885	0.0002082	0.000561559
XYLB	89.7977	-1.64051	0.258012	-6.35828	2.04026e-10	1.00133e-09
HDAC6	1123.43	0.111067	0.0970318	1.14465	0.252355	0.347892
OR1I1	0	NA	NA	NA	NA	NA
GABRP	0.179041	1.25133	4.08047	0.306664	0.759099	NA
KRT31	0	NA	NA	NA	NA	NA
CDC6	945.376	-3.38857	0.110524	-30.6591	1.99834e-206	3.3822e-204
UPRT	250.434	0.00489143	0.1454	0.0336411	0.973163	0.980555
CDC23	1053.63	-0.551289	0.0879455	-6.26853	3.64463e-10	1.75253e-09
AAAS	855.558	-0.0943713	0.103594	-0.910972	0.36231	0.465397
CBX5	4279.26	-1.54771	0.102332	-15.1244	1.11795e-51	2.64402e-50
FMO2	1.12393	3.75755	2.43216	1.54495	0.122359	0.190211
SUCO	2071.63	-0.0242574	0.0873833	-0.277598	0.781321	0.83772
[truncated: 17,924 more rows]

## Sheet: S_PMvsN_PM
	baseMean	log2FoldChange	lfcSE	stat	pvalue	padj
TSPAN6	1470.61	-1.59952	0.0907552	-17.6245	1.59721e-69	1.50758e-67
TNMD	1.75238	-0.517853	3.83517	-0.135027	0.89259	0.932841
DPM1	876.937	-0.0618108	0.0941865	-0.65626	0.511657	0.633408
SCYL3	179.107	0.0104968	0.178746	0.0587248	0.953171	0.971448
C1orf112	123.184	0.234949	0.219833	1.06876	0.285176	0.408511
FGR	0.332932	0.245345	3.65461	0.0671331	0.946476	NA
CFH	56.1905	2.76293	0.336224	8.21752	2.0775e-16	2.92012e-15
FUCA2	956.595	-0.557447	0.0862317	-6.46453	1.01616e-10	8.71459e-10
GCLC	427.911	0.147815	0.111493	1.32578	0.184913	0.291776
NFYA	817.418	-0.915516	0.0961648	-9.52028	1.7271e-21	3.24853e-20
STPG1	125.025	0.262419	0.200969	1.30577	0.19163	0.299884
NIPAL3	1275.27	0.749943	0.0777282	9.64826	4.99944e-22	9.68424e-21
LAS1L	895.056	0.156729	0.0833026	1.88144	0.0599119	0.116328
ENPP4	73.4584	0.546425	0.247492	2.20785	0.0272549	0.0597843
SEMA3F	31.0798	-1.97233	0.429737	-4.58963	4.44041e-06	2.19191e-05
CFTR	79.0954	0.0419125	0.247493	0.169348	0.865523	0.915426
ANKIB1	1653.86	-0.271668	0.0745144	-3.64585	0.00026651	0.000971232
CYP51A1	89.1421	0.105126	0.239879	0.438247	0.661207	0.760423
KRIT1	199.084	-0.151093	0.16481	-0.916769	0.359264	0.488022
RAD52	278.441	-0.361594	0.132594	-2.72708	0.00638972	0.0168239
BAD	36.9414	0.740544	0.378099	1.9586	0.0501598	0.10032
LAP3	918.693	0.397842	0.0883049	4.50532	6.62734e-06	3.19351e-05
CD99	8373.71	-0.565776	0.0687325	-8.23156	1.84793e-16	2.60449e-15
HS3ST1	35.2684	-2.35458	0.399502	-5.89379	3.77445e-09	2.77804e-08
AOC1	2.56064	2.33208	1.49001	1.56514	0.11755	0.203143
WNT16	11.7548	-2.28733	0.760991	-3.00572	0.00264952	0.00768124
HECW1	6.0587	-0.682419	0.845854	-0.806782	0.419792	0.547375
MAD1L1	5.4599	1.33389	0.987959	1.35015	0.176968	0.281493
LASP1	7731.8	0.932178	0.0597183	15.6096	6.26264e-55	4.20407e-53
SNX11	349.642	0.149066	0.119296	1.24955	0.211465	0.324372
TMEM176A	40.4384	3.45763	0.434926	7.94994	1.86607e-15	2.45457e-14
M6PR	1415.3	-0.0212225	0.0800889	-0.264987	0.791019	0.861733
KLHL13	129.834	-0.453952	0.205224	-2.21199	0.0269673	0.0592536
CYP26B1	16.4358	1.01015	0.529916	1.90625	0.0566181	0.11081
ICA1	204.346	-0.429351	0.172144	-2.49414	0.0126262	0.0307635
DBNDD1	62.8119	-0.241526	0.282776	-0.854126	0.393035	0.520593
ALS2	1337.87	-0.155225	0.0788033	-1.96978	0.0488642	0.0983345
CASP10	99.0523	0.388599	0.250326	1.55237	0.120573	0.207308
CFLAR	834.833	0.702681	0.0907959	7.73913	1.00099e-14	1.22462e-13
TFPI	2024.21	-0.461166	0.0680332	-6.77854	1.21395e-11	1.13961e-10
NDUFAF7	417.007	-0.273009	0.110964	-2.46034	0.0138807	0.0334537
RBM5	2069.86	-0.584898	0.0717732	-8.14925	3.66188e-16	5.04691e-15
MTMR7	40.2016	0.0583169	0.381783	0.152749	0.878596	0.924232
SLC7A2	195.258	-0.154046	0.158977	-0.968985	0.332553	0.460126
ARF5	858.096	-0.201044	0.0957468	-2.09975	0.0357511	0.0750907
SARM1	812.43	1.80302	0.094258	19.1285	1.46166e-81	1.9624e-79
POLDIP2	1594.02	0.307328	0.0741952	4.14215	3.44067e-05	0.000148189
PLXND1	2081.3	-0.991916	0.0705789	-14.054	7.28047e-45	3.52131e-43
AK2	1900.32	0.616673	0.0695005	8.87292	7.12502e-19	1.17052e-17
CD38	19.3649	2.20865	0.543793	4.06156	4.87458e-05	0.000204517
FKBP4	1088.5	0.465558	0.0851662	5.46647	4.59091e-08	2.99158e-07
KDM1A	2686.09	-0.544738	0.0605484	-8.99675	2.32508e-19	3.93596e-18
RBM6	2072.94	-0.295641	0.0698346	-4.23345	2.30133e-05	0.000101647
CAMKK1	97.2774	0.419439	0.233481	1.79646	0.0724218	0.136203
RECQL	865.565	0.127069	0.0833789	1.52399	0.127511	0.216464
VPS50	391.404	-0.396038	0.13058	-3.03291	0.00242207	0.00707054
HSPB6	49.778	1.35061	0.345977	3.90375	9.47129e-05	0.000376771
ARHGAP33	167.642	-0.111956	0.17848	-0.627273	0.53048	0.650054
NDUFAB1	1115.44	0.00920566	0.0875891	0.1051	0.916296	0.950061
PDK4	118.367	-0.804423	0.208381	-3.86034	0.000113227	0.000441402
SLC22A16	0.174916	1.20711	4.08047	0.295827	0.767362	NA
ZMYND10	4.53579	1.05931	1.10183	0.961411	0.336346	0.46389
ABCB5	1.62393	4.27171	2.10558	2.02875	0.0424836	0.0869206
ARX	0.626683	0.376909	2.88874	0.130475	0.89619	NA
SLC25A13	972.132	0.0962323	0.0948743	1.01431	0.310433	0.436619
ST7	371.718	0.818047	0.121399	6.7385	1.60032e-11	1.4853e-10
CDC27	1938.34	0.210151	0.0699629	3.00375	0.00266671	0.00772675
SLC4A1	0.612979	-2.61838	2.63796	-0.992577	0.320916	NA
CALCR	0.55486	2.71631	2.95898	0.917987	0.358626	NA
HCCS	364.52	0.245634	0.128478	1.91187	0.0558929	0.109687
DVL2	867.672	-0.633195	0.092975	-6.81038	9.73399e-12	9.24373e-11
PRSS22	5.94654	-3.9515	1.26672	-3.11948	0.00181168	0.00544484
UPF1	1784.15	0.453886	0.0748312	6.06547	1.31569e-09	1.0169e-08
SKAP2	491.245	-0.346431	0.108687	-3.18743	0.00143546	0.00441727
SLC25A5	1839.37	-0.51345	0.0776908	-6.60888	3.8723e-11	3.46195e-10
MCUB	286.857	-0.0941098	0.133028	-0.707443	0.479291	0.60402
HOXA11	374.182	-0.464576	0.116892	-3.97442	7.05524e-05	0.000286813
POLR2J	367.416	-0.130289	0.152849	-0.852403	0.393991	0.521769
DHX33	630.368	0.384799	0.0995895	3.86385	0.000111613	0.000436093
MEOX1	51.862	1.79946	0.308654	5.83003	5.54181e-09	3.9939e-08
THSD7A	360.917	-0.0114936	0.127784	-0.0899459	0.92833	0.957416
LIG3	678.443	0.18151	0.0984859	1.84301	0.0653276	0.125282
RPAP3	758.491	-0.0973431	0.0945846	-1.02916	0.303403	0.428914
ACSM3	61.4693	1.62832	0.279553	5.82473	5.7206e-09	4.11513e-08
REXO5	94.4715	-0.341933	0.227544	-1.50271	0.132914	0.223663
CIAPIN1	925.494	-0.114741	0.0908832	-1.26251	0.206766	0.318829
SPPL2B	742.1	-0.344928	0.106206	-3.24773	0.00116331	0.00365349
FAM214B	970.772	0.15182	0.0929635	1.63312	0.102444	0.181757
COPZ2	625.217	1.31113	0.118237	11.089	1.41873e-28	3.79645e-27
PRKAR2B	212.906	-1.43823	0.160336	-8.97007	2.96317e-19	4.98902e-18
MSL3	629.207	-0.47907	0.100367	-4.77319	1.81329e-06	9.55029e-06
CREBBP	1796.89	0.199004	0.085766	2.32032	0.0203238	0.0464178
TSPOAP1	235.231	-0.416707	0.160041	-2.60375	0.00922094	0.0232826
MPO	0.56299	2.7353	3.20079	0.854572	0.392788	NA
PON1	3.53897	-3.14782	1.42263	-2.21268	0.02692	0.0591663
GCFC2	216.593	-0.094906	0.159532	-0.594902	0.551909	0.669791
WDR54	235.054	-0.455007	0.140887	-3.22959	0.00123969	0.00387457
CROT	318.471	-0.617351	0.132865	-4.64645	3.37694e-06	1.707e-05
ABCB4	36.0516	-0.287273	0.386113	-0.744014	0.456868	0.582446
KMT2E	1284.5	-0.363171	0.0791481	-4.58849	4.46453e-06	2.20312e-05
RHBDD2	695.321	-0.330085	0.0958881	-3.4424	0.000576574	0.00195123
SOX8	56.8079	-1.10313	0.326932	-3.37418	0.00074036	0.00243617
IBTK	2249.48	0.0130654	0.0696193	0.187669	0.851136	0.905251
ZNF195	631.725	-0.358867	0.100623	-3.56647	0.00036182	0.00128155
MYCBP2	840.48	0.173258	0.0903215	1.91824	0.0550807	0.10838
FBXL3	503.432	-0.0693575	0.107446	-0.64551	0.518597	0.639936
ITGAL	0.533984	2.67043	2.99858	0.890564	0.373163	NA
PDK2	343.585	0.114954	0.134375	0.85547	0.392291	0.519784
ITGA3	1045.8	0.724784	0.102704	7.05705	1.70068e-12	1.72888e-11
ZFX	700.789	0.211975	0.100369	2.11195	0.0346904	0.0731872
LAMP2	3050.98	-0.157225	0.0656262	-2.39577	0.0165856	0.0389668
ITGA2B	21.77	-0.841027	0.483946	-1.73785	0.082237	0.151623
ASB4	0.532411	-0.790228	3.07472	-0.257008	0.797172	NA
GDE1	1448.39	0.0167957	0.08382	0.200378	0.841185	0.898102
REX1BD	436.639	-0.342729	0.110991	-3.08789	0.00201583	0.00599248
CRLF1	54.5039	-2.93624	0.374512	-7.8402	4.49842e-15	5.72841e-14
OSBPL7	380.833	-0.360168	0.123537	-2.91548	0.00355141	0.00999271
TMEM98	1792.15	-0.242047	0.0761777	-3.1774	0.00148603	0.0045531
YBX2	16.2675	-1.72585	0.559969	-3.08204	0.00205588	0.00610105
KRT33A	0.174916	1.20711	4.08047	0.295827	0.767362	NA
MAP3K14	132.474	1.15409	0.199269	5.79163	6.97063e-09	4.9571e-08
ABCC8	0	NA	NA	NA	NA	NA
CACNG3	0.174916	1.20711	4.08047	0.295827	0.767362	NA
TMEM132A	1938.69	-0.399953	0.0728567	-5.48959	4.02877e-08	2.65415e-07
AP2B1	5871.12	-0.0179026	0.0560581	-0.319358	0.749455	0.828155
TAC1	2.60683	2.30981	1.42053	1.62601	0.103947	0.183958
ZNF263	539.491	0.434989	0.1188	3.66152	0.000250728	0.000918136
CX3CL1	25.8392	-3.21141	0.534899	-6.00376	1.92801e-09	1.46544e-08
SPATA20	804.864	0.136897	0.0912922	1.49955	0.13373	0.224867
CACNA1G	9.23074	-1.39775	0.714682	-1.95577	0.0504926	0.100843
TNFRSF12A	1106.73	0.498444	0.112203	4.44233	8.89911e-06	4.18842e-05
DLX6	2.55569	-0.483848	1.43078	-0.338171	0.735234	0.817502
MAP3K9	325.84	0.160523	0.14709	1.09132	0.275131	0.398003
RALA	698.118	-0.34883	0.0910229	-3.83233	0.000126937	0.000490549
BAIAP2L1	728.24	-0.19413	0.0999187	-1.94288	0.0520308	0.103389
KDM7A	287.894	-0.513303	0.140893	-3.64322	0.000269244	0.000980179
ETV1	482.264	-1.69589	0.116134	-14.603	2.68844e-48	1.45381e-46
AGK	522.531	-0.145025	0.101683	-1.42625	0.153796	0.251785
ALDH3B1	183.6	0.996235	0.211913	4.70116	2.58693e-06	1.32747e-05
TTC22	1.15268	-1.21231	2.32242	-0.522002	0.601669	NA
PHTF2	1729.43	-0.809307	0.0737798	-10.9692	5.37306e-28	1.40403e-26
CCL26	10.2022	0.960401	0.676851	1.41893	0.155921	0.254401
FARP2	781.792	0.282655	0.100974	2.79928	0.00512168	0.0138337
USH1C	0	NA	NA	NA	NA	NA
GGCT	74.0446	0.394409	0.257263	1.5331	0.125252	0.213538
DBF4	296.277	0.0296767	0.127879	0.232068	0.816485	0.881322
TBXA2R	29.7822	-0.506411	0.405225	-1.24971	0.211407	0.324316
IFRD1	209.423	-0.493764	0.166249	-2.97002	0.0029778	0.00854233
LGALS14	0	NA	NA	NA	NA	NA
COX10	327.979	0.442985	0.127348	3.47854	0.000504159	0.00173023
GTF2IRD1	606.089	-0.424769	0.0951952	-4.46209	8.11652e-06	3.84449e-05
PAF1	987.227	-0.172286	0.0851867	-2.02245	0.04313	0.0881042
VPS41	1346.84	-0.406053	0.0764209	-5.31338	1.07612e-07	6.72253e-07
ARHGAP44	87.8908	-0.300584	0.282519	-1.06394	0.287355	0.410763
ELAC2	1025.18	0.208414	0.089125	2.33844	0.0193644	0.0445467
SCIN	16.9135	0.959316	0.504564	1.90128	0.0572655	0.111915
ARSD	220.148	0.513297	0.154048	3.33205	0.00086208	0.00278896
PNPLA4	240.016	-0.0825018	0.16402	-0.502998	0.614966	0.722774
MYH13	0.172374	-0.716439	4.08047	-0.175577	0.860626	NA
ADIPOR2	1045.55	0.0291479	0.0851198	0.342434	0.732025	0.815432
CDKL3	19.2754	1.08042	0.501262	2.15539	0.0311311	0.0668924
UPP2	0.478555	-2.25174	3.12277	-0.721071	0.470866	NA
PRSS21	0	NA	NA	NA	NA	NA
MARK4	833.227	0.00810694	0.0889759	0.0911139	0.927402	0.957084
PROM1	161.858	-0.836555	0.170736	-4.89971	9.59767e-07	5.25762e-06
CCDC124	793.221	0.183691	0.0967488	1.89864	0.0576116	0.112493
CEACAM21	10.2402	-2.83467	0.789711	-3.58951	0.000331302	0.00118152
PAFAH1B1	2851.46	-0.0602205	0.0593774	-1.0142	0.310488	0.436657
NOS2	2.10314	2.44692	1.7994	1.35985	0.173877	0.277598
DNAH9	19.7049	-0.303844	0.488247	-0.622316	0.533734	0.65313
KIAA0100	1548.5	0.30668	0.0706893	4.33842	1.43508e-05	6.5408e-05
SLC13A2	0.359068	2.09562	3.823	0.548162	0.583581	NA
GAS7	2031.13	1.20223	0.0932225	12.8963	4.72209e-38	1.82486e-36
TRAPPC6A	130.072	-0.643615	0.188708	-3.41065	0.000648092	0.00216503
MATK	12.2771	0.42553	0.599605	0.709683	0.477901	0.602707
CEACAM7	0	NA	NA	NA	NA	NA
CD79B	0.359068	2.09562	3.823	0.548162	0.583581	NA
SCN4A	6.19118	-1.10089	0.85905	-1.28152	0.20001	0.310224
ST7L	308.432	0.590228	0.146323	4.03374	5.48953e-05	0.000227438
TKTL1	0.50323	1.10526	3.13591	0.352453	0.724498	NA
PAX6	1.26959	-2.51444	2.15791	-1.16522	0.243931	NA
RPUSD1	270.043	-0.0670776	0.137329	-0.488444	0.625235	0.730818
RHBDF1	957.244	-0.790568	0.0840494	-9.40599	5.15413e-21	9.45471e-20
LUC7L	1446.98	-0.433434	0.0792883	-5.46656	4.58846e-08	2.99124e-07
CACNA2D2	49.7155	-0.622161	0.321868	-1.93297	0.0532395	0.105383
BAIAP3	47.1514	-1.07042	0.334517	-3.19989	0.00137482	0.00425421
TSR3	458.862	-0.0843979	0.121313	-0.695706	0.486613	0.610874
PIGQ	461.873	-0.691471	0.111619	-6.19491	5.83182e-10	4.65052e-09
CRAMP1	307.455	-0.32395	0.131168	-2.46973	0.0135214	0.0326788
TEAD3	1420.35	0.0859364	0.0777511	1.10528	0.26904	0.391262
SELE	0.478555	-2.25174	3.12277	-0.721071	0.470866	NA
DNAJC11	1092.5	0.440432	0.08047	5.47324	4.41884e-08	2.8867e-07
FMO3	0.938918	0.371651	2.28895	0.162368	0.871016	NA
MYLIP	362.68	0.36444	0.11904	3.06149	0.00220239	0.00649499
NOX1	5.92805	-0.455573	0.852619	-0.534322	0.593119	0.704648
E2F2	57.9695	2.18397	0.310806	7.02677	2.11366e-12	2.13063e-11
PSMB1	2861.02	-0.0593475	0.0690994	-0.858871	0.390412	0.517822
SYN1	28.7497	0.147759	0.426757	0.346237	0.729165	0.813526
JARID2	1225.47	-0.71608	0.0921695	-7.76916	7.90099e-15	9.78918e-14
CDKL5	377.247	-0.357922	0.126599	-2.82722	0.0046954	0.0128269
CAMK1G	13.5237	-4.151	0.881577	-4.70861	2.49415e-06	1.2824e-05
CDK11A	6.80397	0.617738	0.826944	0.747013	0.455056	0.580857
NADK	973.688	0.0109176	0.0828001	0.131855	0.895099	0.934481
TFAP2B	0	NA	NA	NA	NA	NA
TFAP2D	0	NA	NA	NA	NA	NA
DLEC1	8.50975	0.640228	0.717112	0.892786	0.371972	0.500367
CYTH3	551.72	0.556651	0.106092	5.24685	1.54724e-07	9.42385e-07
ADAM22	69.2106	-1.13332	0.256748	-4.41415	1.01406e-05	4.72987e-05
SYPL1	1272.91	0.11078	0.0794324	1.39465	0.163121	0.263997
CYB561	255.456	0.55568	0.142487	3.89987	9.62427e-05	0.000381687
SPAG9	2746.65	-0.290307	0.0627157	-4.62894	3.67533e-06	1.8411e-05
CELSR3	612.909	-0.533608	0.0961536	-5.54954	2.86424e-08	1.91203e-07
AASS	1593.93	-0.832493	0.0752836	-11.0581	2.00294e-28	5.31411e-27
PLEKHG6	32.4803	0.43537	0.414164	1.0512	0.293167	0.417462
SS18L2	161.23	-0.257711	0.168751	-1.52717	0.126719	0.21538
MPND	44.1572	0.81925	0.342472	2.39216	0.0167493	0.0392676
MGST1	660.247	0.501899	0.0934114	5.37299	7.74404e-08	4.91666e-07
CRY1	569.248	-0.362763	0.103741	-3.49682	0.000470842	0.00162953
PGLYRP1	8.37427	0.599255	0.764846	0.783498	0.433335	0.560947
NFIX	132.839	3.73763	0.690948	5.40943	6.32257e-08	4.06053e-07
ST3GAL1	2123.95	0.981568	0.0817475	12.0073	3.25251e-33	1.06641e-31
MMP25	26.1846	-0.173941	0.417986	-0.416141	0.677307	0.773739
IL32	162.325	0.943064	0.179337	5.25862	1.45144e-07	8.889e-07
PKD1	1596.36	0.581716	0.102469	5.67699	1.37084e-08	9.47604e-08
MAPK8IP2	143.246	0.498201	0.180945	2.75333	0.00589922	0.0156756
MED24	1286.05	-0.160973	0.0812062	-1.98228	0.0474481	0.095819
RHOBTB2	224.654	0.128859	0.160369	0.803514	0.421678	0.549006
HEATR5B	656.983	0.16429	0.104685	1.56938	0.11656	0.201881
SEC62	2637.9	0.0762611	0.0630503	1.20953	0.22646	0.341356
RPS20	8449.12	-0.473661	0.0666299	-7.10883	1.17029e-12	1.20384e-11
CSDE1	11540	-0.0493246	0.0507873	-0.971198	0.33145	0.459001
UBE3C	1851.05	0.151062	0.0688977	2.19256	0.0283391	0.0618487
REV3L	1025.56	0.348392	0.101109	3.44571	0.000569563	0.00193086
TENM1	213.238	0.410212	0.146608	2.79801	0.0051418	0.0138856
PAX7	1.18993	-2.39856	2.15046	-1.11537	0.264691	NA
MASP2	98.8638	0.0426438	0.251181	0.169773	0.865189	0.915197
IYD	0.359068	2.09562	3.823	0.548162	0.583581	NA
FAM76A	93.4762	-0.16392	0.23266	-0.704546	0.481093	0.605702
TRAF3IP3	1.71567	0.138332	1.81684	0.0761386	0.939309	0.963655
POMT2	589.499	0.121994	0.0969256	1.25864	0.208162	0.320569
VTA1	1012.84	0.295887	0.0912981	3.24089	0.00119155	0.00373386
MLXIPL	2.83764	-1.10308	1.24132	-0.888634	0.3742	0.502241
BAZ1B	2683.11	-0.0115037	0.066758	-0.172319	0.863187	0.913886
RANBP9	639.457	-0.357126	0.0934911	-3.8199	0.000133506	0.000513641
ETV7	8.9883	1.20254	0.794543	1.5135	0.130152	0.219947
SPRTN	299.227	-0.0503997	0.127374	-0.395683	0.692339	0.784751
EEF1AKNMT	526.121	0.124344	0.108415	1.14693	0.251409	0.370957
DYRK4	158.303	0.485111	0.195745	2.47827	0.0132019	0.031995
ZNF207	3167.32	-0.448369	0.0601945	-7.44868	9.42788e-14	1.07019e-12
UQCRC1	2020.57	-0.171831	0.0779978	-2.20302	0.027593	0.0604153
STARD3NL	803.346	-0.614483	0.0906635	-6.77762	1.22171e-11	1.14551e-10
CD9	517.549	0.0621404	0.108027	0.57523	0.565136	0.680487
HHATL	0.306181	-1.61588	3.7281	-0.433433	0.6647	NA
NCAPD2	1673.08	0.140851	0.102189	1.37835	0.168096	0.270307
IFFO1	599.832	0.0518834	0.100405	0.516742	0.605336	0.715234
GIPR	274.373	-0.672358	0.139231	-4.82909	1.37155e-06	7.35811e-06
PHF7	118.084	-0.391286	0.201204	-1.94473	0.051808	0.103073
SEMA3G	13.7578	-2.91244	0.717307	-4.06023	4.90239e-05	0.000205482
NISCH	3212.58	-0.00797538	0.0631057	-0.126381	0.89943	0.938038
STAB1	4.91561	-0.160947	1.04533	-0.153968	0.877635	0.923616
FUZ	106.185	0.141724	0.208032	0.681259	0.495708	0.619282
SLC6A13	15.2852	1.06994	0.537278	1.9914	0.046437	0.0939599
IDS	310.659	0.298487	0.16281	1.83335	0.0667512	0.127635
PRSS3	3.15911	0.77503	1.19158	0.650424	0.515418	0.636735
ZNF200	162.528	0.283503	0.168396	1.68355	0.0922694	0.166744
CD4	50.6838	-0.127388	0.295958	-0.430425	0.666887	0.76509
LRRC23	114.451	0.438432	0.198259	2.21141	0.0270073	0.059333
BTK	4.73686	-0.242447	0.948363	-0.255648	0.798223	0.867733
HFE	155.307	0.850869	0.177442	4.79519	1.62518e-06	8.62368e-06
SCMH1	867.671	-0.189424	0.102364	-1.85049	0.064243	0.123597
FYN	2523.28	0.290865	0.0652338	4.45881	8.2417e-06	3.90141e-05
HIVEP2	529.913	0.410583	0.105761	3.88217	0.000103527	0.000407669
FMO1	2.7206	-0.553776	1.28431	-0.431185	0.666334	0.764737
ELOA	1190.88	0.180909	0.0847875	2.13368	0.0328693	0.0699708
LYPLA2	856.114	-0.600952	0.0953254	-6.30422	2.89656e-10	2.38935e-09
CLCN6	669.166	-0.155489	0.0950923	-1.63514	0.10202	0.181093
MRC2	9282.29	0.609046	0.0557714	10.9204	9.20925e-28	2.38644e-26
NME1-NME2	0	NA	NA	NA	NA	NA
SLC6A7	0.375326	2.15001	3.75687	0.572288	0.567127	NA
TSPAN9	2102.54	0.124639	0.0822051	1.51619	0.129471	0.219077
BTBD7	1504.9	0.477224	0.0859734	5.55083	2.84319e-08	1.89973e-07
APBA3	181.095	-0.133826	0.16079	-0.8323	0.40524	0.532726
MKS1	266.427	-0.442887	0.144831	-3.05795	0.00222857	0.00656597
ABHD5	249.104	0.065999	0.158987	0.415122	0.678053	0.774364
ANOS1	855.685	0.570265	0.0890231	6.4058	1.49579e-10	1.26674e-09
AKAP8L	699.179	-0.704471	0.104724	-6.72695	1.73255e-11	1.59661e-10
MBTD1	707.137	-0.177106	0.0898313	-1.97154	0.0486618	0.0979831
UTP18	509.814	-0.385398	0.110508	-3.48751	0.000487533	0.00167872
RNF216	1117.54	0.211181	0.0836559	2.52441	0.0115894	0.028532
TTC19	752.054	0.0789412	0.0872184	0.905097	0.365414	0.494092
PTBP1	4939.65	0.361884	0.058276	6.20984	5.30393e-10	4.25352e-09
DPF1	68.9381	-0.137749	0.256994	-0.536	0.591959	0.703807
SYT7	30.7055	-2.00268	0.410086	-4.88356	1.04189e-06	5.68154e-06
LARS2	535.237	0.0925658	0.105306	0.879017	0.379392	0.507311
PIK3C2A	2149.63	-0.32652	0.0713833	-4.57418	4.78086e-06	2.34658e-05
PLAUR	453.87	0.0679622	0.115069	0.590624	0.554773	0.672062
ANLN	1060.08	0.117009	0.0900526	1.29934	0.193828	0.302806
WIZ	1075.48	0.0344126	0.0862125	0.39916	0.689775	0.783073
RABGAP1	1293.98	-0.378592	0.0812669	-4.65863	3.18328e-06	1.61487e-05
DCN	8071.38	3.61938	0.209752	17.2555	1.01771e-66	9.10909e-65
QPCTL	350.898	-0.55948	0.130652	-4.28222	1.85035e-05	8.28321e-05
PPP5C	1144.78	-0.20341	0.0810406	-2.50998	0.0120738	0.029603
CEP68	316.521	0.137231	0.125424	1.09413	0.273896	0.396695
MAP4K3	1522.16	-0.237233	0.0711409	-3.33469	0.000853931	0.00276604
ZBTB32	28.3598	0.598724	0.413773	1.44699	0.147901	0.243618
TYROBP	1.25002	-1.34611	1.95833	-0.687378	0.491844	NA
TMEM159	329.904	-0.0911934	0.12153	-0.750376	0.453028	0.579219
GABRA3	11.4578	-1.59046	0.677097	-2.34894	0.0188271	0.0434518
BRCA1	312.099	0.856953	0.139977	6.12208	9.23634e-10	7.25766e-09
ERCC1	683.953	-0.0443396	0.108751	-0.407716	0.683482	0.778623
CD22	10.7802	1.55354	0.780879	1.98948	0.046648	0.0943501
SEMA3B	528.983	0.363318	0.122935	2.95538	0.00312288	0.00892235
MBTPS2	645.743	0.184557	0.101287	1.82211	0.0684386	0.130031
PRICKLE3	101.813	0.153326	0.216619	0.707813	0.479061	0.603779
LTF	0.893051	3.41139	2.50189	1.36352	0.172717	NA
EXTL3	1275.89	-0.3326	0.0866095	-3.84022	0.000122922	0.000476229
NR1H4	0.153399	-0.716439	4.08047	-0.175577	0.860626	NA
ELOVL5	4304.86	1.27734	0.0686119	18.6169	2.34236e-77	2.78472e-75
ALOX5	19.3467	-2.62424	0.556019	-4.7197	2.36191e-06	1.22208e-05
KDM5D	1094.26	-0.575448	0.0796236	-7.22709	4.93442e-13	5.26001e-12
CALCOCO1	1867.16	-0.295054	0.0668672	-4.41253	1.02171e-05	4.7641e-05
UBR7	386.009	0.609937	0.12581	4.84808	1.2466e-06	6.74349e-06
MAP4K5	1704.08	-0.48108	0.0768253	-6.262	3.8007e-10	3.09097e-09
EHD3	997.106	0.309083	0.0908402	3.40249	0.000667749	0.00222259
PSMC4	1468.89	-0.0910797	0.0786171	-1.15852	0.246651	0.365691
MAN2B2	1314.18	0.492032	0.0834305	5.89751	3.69027e-09	2.71994e-08
SLC7A14	99.0379	1.63352	0.229248	7.12556	1.03655e-12	1.07694e-11
CLDN11	353.499	2.25249	0.307488	7.32545	2.38095e-13	2.61502e-12
SLC25A39	1039.27	-0.0464793	0.0838533	-0.554293	0.579378	0.692922
MVP	723.256	1.12773	0.0973673	11.5822	5.07021e-31	1.52439e-29
NUB1	887.087	0.266671	0.0938921	2.84019	0.00450874	0.0123753
PGM3	3123.87	0.52083	0.067698	7.69343	1.43246e-14	1.72405e-13
RWDD2A	359.723	-0.147592	0.120339	-1.22646	0.220024	0.334008
CLK1	1797.06	-0.0784769	0.0748364	-1.04865	0.294341	0.418904
POLR3B	274.003	0.602726	0.145625	4.13888	3.49002e-05	0.000150148
ANGEL1	402.4	0.384566	0.12059	3.18904	0.00142746	0.00439788
RNF14	753.479	-0.0795073	0.0907716	-0.875905	0.381082	0.50908
DNASE1L1	121.231	0.103338	0.201375	0.513159	0.60784	0.717268
DDX11	222.652	0.241817	0.164641	1.46875	0.141901	0.235964
HEBP1	354.561	0.403896	0.122552	3.29572	0.000981695	0.00313941
GPRC5A	1335.49	1.69188	0.096872	17.4651	2.64066e-68	2.41915e-66
MAMLD1	102.44	2.335	0.264283	8.83523	9.98905e-19	1.629e-17
CD6	8.07208	1.7737	0.833471	2.12808	0.0333301	0.0708503
TACC3	762.63	0.195745	0.0999244	1.95893	0.0501205	0.100267
UFL1	1265.59	0.0258772	0.075443	0.343003	0.731596	0.815187
POLA2	49.6089	0.504804	0.310034	1.62822	0.103478	0.183278
ZC3H3	282.459	0.0363159	0.136277	0.266485	0.789865	0.860745
CAPN1	2398.37	-0.0170095	0.0688462	-0.247065	0.804858	0.873022
ACP3	92.084	-0.12817	0.24083	-0.532202	0.594586	0.706014
MDH1	3262.7	-0.228864	0.0599945	-3.81475	0.000136319	0.000523688
SLC30A9	1620.28	-0.18721	0.069979	-2.67523	0.0074678	0.0193324
MTMR11	229.246	-0.639845	0.156767	-4.0815	4.47452e-05	0.000188851
COX15	466.919	-0.175837	0.106581	-1.64979	0.0989859	0.176607
CCDC88C	55.9907	-0.463818	0.292539	-1.58549	0.112855	0.19682
YAF2	269.539	-0.230878	0.13757	-1.67825	0.0932978	0.16831
ZMYND11	1591.16	-0.00117081	0.0742226	-0.0157743	0.987414	0.992001
WAS	13.0891	-0.00214719	0.591604	-0.00362944	0.997104	0.998188
DPEP1	18.6755	-1.49407	0.522257	-2.8608	0.0042258	0.0116793
BID	287.974	0.42171	0.138684	3.0408	0.00235947	0.00690591
MATR3	121.683	-0.284761	0.196553	-1.44877	0.147401	0.243
NPC1L1	2.81263	-1.0741	1.28068	-0.838698	0.401639	0.529242
XYLT2	880.858	-0.0732712	0.0851847	-0.860144	0.389709	0.517288
RGPD5	28.0462	-0.554318	0.469722	-1.1801	0.237961	0.355325
STMN4	0.594003	-2.58065	2.87642	-0.897174	0.369626	NA
NUDCD3	1227.62	0.468437	0.0772977	6.06017	1.3598e-09	1.04787e-08
ISL1	523.2	-2.48977	0.120239	-20.7068	3.00719e-95	5.14659e-93
CHDH	22.9098	0.542707	0.452831	1.19848	0.230731	0.346519
IL20RA	1.3284	0.287968	1.87002	0.153992	0.877616	NA
CLCA1	0	NA	NA	NA	NA	NA
CLCA4	0.890509	2.13418	2.56508	0.832014	0.405401	NA
GLT8D1	1881.08	-0.107186	0.0685114	-1.5645	0.117701	0.203336
ATP2C1	2354.38	0.436394	0.0677303	6.44311	1.17048e-10	9.99397e-10
IGF1	33.7043	-1.44525	0.374002	-3.8643	0.000111409	0.000435435
SLC38A5	463.261	1.41711	0.116661	12.1473	5.93139e-34	2.01254e-32
RALBP1	1407.81	0.0318173	0.0712031	0.446854	0.654981	0.75574
RUFY3	1181.55	-0.23888	0.0857948	-2.78431	0.0053641	0.0144409
CNTN1	706.356	-0.137143	0.0965836	-1.41994	0.155625	0.254111
SLC11A1	7.81419	-0.772227	0.7437	-1.03836	0.299103	0.423977
WWTR1	1168.66	0.192077	0.0867237	2.21482	0.0267727	0.0589091
AGPS	1778.12	-0.242397	0.0688578	-3.52025	0.000431134	0.0015038
CXorf56	277.656	0.0616995	0.131393	0.469578	0.638657	0.742327
ATP1A2	16.7586	-2.37416	0.603227	-3.93576	8.29339e-05	0.000333405
TTC27	311.929	0.499492	0.136192	3.66755	0.000244887	0.000898438
ZNF582	44.5029	-0.0475311	0.30698	-0.154834	0.876952	0.923188
VSIG2	0.174916	1.20711	4.08047	0.295827	0.767362	NA
PHLDB1	1156.89	0.0429977	0.0871764	0.493226	0.621853	0.728395
MARCO	1.08884	3.69342	2.16811	1.70352	0.0884714	NA
CYP24A1	11.4693	0.288956	0.602829	0.479332	0.631702	0.736442
PRDM11	344.211	0.735451	0.129346	5.68592	1.3011e-08	9.03624e-08
SYT13	16.0272	-0.692896	0.577308	-1.20022	0.230055	0.345871
SNAI2	2012.14	-0.914041	0.0746257	-12.2483	1.71472e-34	5.88217e-33
CD74	199.592	0.192662	0.159509	1.20784	0.227108	0.342116
HGF	6547.61	0.537223	0.0899698	5.97115	2.35585e-09	1.7699e-08
ZRANB1	332.961	-0.17792	0.120903	-1.47159	0.141131	0.234961
NCDN	639.382	0.198463	0.101308	1.95902	0.050111	0.100261
ADGRA2	8019.88	0.51674	0.0675126	7.65397	1.94865e-14	2.32554e-13
ZFP64	345.872	-0.0433406	0.126874	-0.341604	0.732649	0.815835
MNAT1	166.543	-0.00792076	0.176282	-0.0449324	0.964161	0.978313
SAMD4A	1204.02	0.0470102	0.079689	0.58992	0.555244	0.672529
RUNX3	0.699664	3.06299	2.94937	1.03852	0.299026	NA
MRE11	458.347	0.456748	0.11298	4.04272	5.2835e-05	0.000219562
PLEKHB1	146.184	0.379471	0.181853	2.08669	0.036916	0.0772029
SERPINB1	380.623	0.747935	0.122213	6.11994	9.36082e-10	7.34436e-09
CYP3A43	0.359068	2.09562	3.823	0.548162	0.583581	NA
SLC7A9	1.39628	2.92861	2.05936	1.42209	0.154999	NA
SPAST	652.052	0.366339	0.0941732	3.89006	0.000100221	0.00039585
NRXN3	315.104	2.3939	0.140759	17.0071	7.27996e-65	6.0956e-63
OSBPL5	333.561	0.255178	0.143624	1.77671	0.0756164	0.141358
AQR	526.601	0.011167	0.105167	0.106184	0.915436	0.949518
CPS1	257.291	-0.645615	0.13908	-4.64205	3.44961e-06	1.73696e-05
C8B	1.0157	1.21764	2.23512	0.544776	0.585908	NA
FHL1	4897.26	1.26891	0.0791933	16.0229	8.84127e-58	6.34534e-56
RTF2	881.675	0.55739	0.0932668	5.9763	2.28266e-09	1.7174e-08
GABRA1	5.8616	3.10696	1.0536	2.94891	0.00318895	0.00907948
NLRP2	0.492875	1.13448	3.15856	0.359177	0.719462	NA
SLC45A4	217.349	0.368282	0.155564	2.3674	0.0179137	0.0416152
RNF10	1684.24	0.343016	0.0721274	4.7557	1.97756e-06	1.03559e-05
ZNF839	165.039	0.199072	0.173839	1.14515	0.252147	0.371763
ZDHHC6	523.019	0.196883	0.102025	1.92975	0.0536377	0.106036
GRAMD1B	166.144	-0.00961942	0.177041	-0.0543343	0.956669	0.973483
RNH1	1708.66	0.598735	0.0810968	7.38297	1.54797e-13	1.72201e-12
NDUFS1	1923.82	-0.050023	0.0683724	-0.731626	0.464397	0.58988
RB1CC1	1293.24	-0.407778	0.0868919	-4.69293	2.69314e-06	1.3788e-05
ERP44	2056.07	-0.227954	0.0663377	-3.43626	0.000589796	0.00198992
ALAS1	965.014	-0.28673	0.0882846	-3.24779	0.00116305	0.00365349
BIRC3	99.6546	1.9124	0.230431	8.29924	1.04778e-16	1.50954e-15
AKAP11	1363.34	-0.0492122	0.081546	-0.60349	0.546183	0.664758
GLRX2	250.813	0.510776	0.154838	3.29877	0.000971083	0.00310739
SNAPC1	80.108	-0.218658	0.254081	-0.860583	0.389468	0.517099
DERA	359.413	-0.484212	0.128192	-3.77725	0.000158569	0.000602478
STRAP	2809.56	-0.1064	0.0666408	-1.59661	0.110352	0.193141
ABCC2	10.4476	0.215106	0.633261	0.339679	0.734098	0.816733
DEF6	67.0662	-0.123018	0.282268	-0.435821	0.662967	0.761996
PLEKHO1	484.71	-0.502772	0.112108	-4.48471	7.30116e-06	3.48584e-05
GCLM	523.099	1.18991	0.11056	10.7626	5.17075e-27	1.2742e-25
UBR2	941.095	-0.126288	0.0889115	-1.42038	0.155496	0.253926
EHD2	5264.06	1.15331	0.0650151	17.7392	2.09009e-70	2.04724e-68
DEPDC1	336.752	0.18025	0.127668	1.41186	0.15799	0.256951
CCDC28A	201.244	-0.348693	0.170372	-2.04666	0.0406918	0.0838641
RRAGD	104.734	-1.60715	0.251131	-6.39967	1.55713e-10	1.31583e-09
HSF2	394.536	-0.623529	0.117238	-5.31849	1.04633e-07	6.55231e-07
PHF20	713.334	-0.13252	0.0904079	-1.4658	0.142702	0.237003
HSD17B6	235.056	1.1839	0.150079	7.88848	3.05881e-15	3.94354e-14
NR1H3	146.864	-0.594182	0.182594	-3.25411	0.0011375	0.00358177
TYMP	24.5931	0.86069	0.428079	2.01059	0.0443693	0.0902805
NCAPH2	446.553	0.473599	0.123376	3.83866	0.00012371	0.000479031
TOMM34	746.754	-0.604274	0.106462	-5.67595	1.37922e-08	9.51706e-08
SEC63	3071.46	0.374131	0.0613021	6.10308	1.04045e-09	8.11826e-09
KPNA6	1655.6	0.170007	0.0717872	2.3682	0.0178747	0.0415431
VIM	11990	-0.585546	0.0727955	-8.04371	8.71576e-16	1.1732e-14
RTEL1-TNFRSF6B	41.4698	-0.364677	0.362448	-1.00615	0.314344	0.440648
FAS	403.181	0.486502	0.117525	4.13955	3.47983e-05	0.000149751
RNASET2	340.111	0.446605	0.136158	3.28005	0.00103789	0.00329811
CD44	1396.37	1.97785	0.0877336	22.5439	1.54285e-112	4.00473e-110
KCNG1	136.345	0.105557	0.195862	0.538933	0.589933	0.702203
AGPAT4	917.179	-0.203605	0.0860095	-2.36724	0.0179212	0.0416264
SLAMF7	0.663173	1.70011	2.63301	0.645691	0.51848	NA
BTN3A1	264.83	0.510277	0.15183	3.36084	0.00077706	0.00254082
MIPEP	178.122	-0.00226938	0.169034	-0.0134256	0.989288	0.99305
PRKCH	22.741	-0.344197	0.458696	-0.750382	0.453025	0.579219
INSRR	2.24566	-1.09103	1.42597	-0.765118	0.444201	0.571074
IFNGR1	568.222	-0.159361	0.100061	-1.59263	0.111243	0.194357
B4GALT7	579.422	0.209641	0.0982312	2.13416	0.03283	0.0699158
SH2D2A	11.9215	-0.533161	0.633245	-0.841951	0.399816	0.527421
VRK2	305.195	0.0168174	0.129669	0.129695	0.896807	0.935804
TNFRSF1B	13.3583	0.618316	0.558214	1.10767	0.268005	0.390121
VEZT	1494.74	0.421652	0.0846169	4.98307	6.25818e-07	3.51859e-06
POU2F2	47.652	0.376734	0.32865	1.14631	0.251668	0.371162
BRD9	766.185	-0.131876	0.0917091	-1.43798	0.15044	0.247146
SNX1	1799.56	0.0741562	0.0708771	1.04626	0.295439	0.420006
TBPL1	221.841	-0.609458	0.177673	-3.43023	0.000603067	0.00202811
ARNTL2	210.611	1.36297	0.167487	8.13772	4.02778e-16	5.53163e-15
BCLAF1	3252.01	-0.0840444	0.0688757	-1.22023	0.222377	0.336569
SLC39A9	1699.95	0.363306	0.0751533	4.83419	1.33688e-06	7.18692e-06
ANK1	28.1727	0.149208	0.448264	0.332859	0.739241	0.820244
IBSP	0.88121	-3.1516	2.47992	-1.27085	0.203783	NA
TFB1M	131.202	-0.265143	0.214251	-1.23754	0.215888	0.329481
RABEP1	980.154	0.153449	0.0868325	1.76718	0.077198	0.143779
HMGB3	1054.75	-0.635994	0.0859394	-7.40049	1.35685e-13	1.51808e-12
NUP160	1117.2	0.0664497	0.0836653	0.794232	0.42706	0.554576
BAK1	386.235	0.414409	0.126295	3.28128	0.00103337	0.00328442
MUSK	3.20307	0.63715	1.36004	0.468478	0.639443	0.742853
IKZF2	210.334	-0.589949	0.168993	-3.49097	0.000481267	0.00166045
GRN	5004.69	-0.118434	0.0551265	-2.1484	0.0316821	0.0678983
FAM13B	860.047	1.17498	0.0855057	13.7415	5.72857e-43	2.62402e-41
ARHGAP31	278.522	0.368002	0.134896	2.72804	0.00637122	0.0167837
CENPQ	101.974	0.0858162	0.212004	0.404785	0.685635	0.780143
SARS1	3579.55	0.626018	0.0619395	10.1069	5.14706e-24	1.09959e-22
RANBP3	834.061	0.176221	0.0908876	1.93889	0.052515	0.104108
ARID4A	595.467	-0.66576	0.0993844	-6.69884	2.10084e-11	1.91897e-10
EIPR1	290.69	0.0647674	0.132129	0.490183	0.624005	0.730094
PNPLA6	713.095	-0.363302	0.0974067	-3.72974	0.000191675	0.000717068
IFT88	253.737	-0.249713	0.138988	-1.79665	0.0723907	0.136164
ALG1	350.995	0.454786	0.125582	3.62142	0.000292992	0.00105921
ZCCHC8	578.51	0.0916651	0.109449	0.837518	0.402302	0.529848
ABCF2	201.387	0.47902	0.161586	2.96448	0.00303193	0.00868639
CHPF2	2462.69	0.162903	0.0676413	2.40834	0.0160252	0.0378516
LRRC7	88.284	2.10647	0.254496	8.277	1.26313e-16	1.80146e-15
FUT8	887.702	-0.13215	0.0990351	-1.33437	0.182082	0.287892
UBA6	1485.92	-0.298482	0.0813955	-3.66706	0.000245359	0.000899956
GAB2	599.288	0.0853302	0.106096	0.804271	0.42124	0.548581
ATP6V0A1	1187.25	-0.112357	0.0825843	-1.36051	0.173667	0.277433
PIAS1	884.688	-0.00626894	0.0956966	-0.0655085	0.947769	0.968477
SLC4A7	718.34	-1.09531	0.1175	-9.32181	1.14371e-20	2.06877e-19
APBA2	218.107	0.181174	0.150986	1.19994	0.230162	0.345998
MAP2K3	387.06	0.603735	0.126899	4.75761	1.95899e-06	1.0276e-05
EFCAB1	11.1454	-1.39479	0.658411	-2.11842	0.0341398	0.0722409
TMSB10	13624.4	-0.338593	0.0824968	-4.10431	4.05521e-05	0.000172368
ASTE1	114.951	0.529393	0.200147	2.64502	0.0081686	0.0209102
RNF19A	690.85	0.239311	0.099554	2.40383	0.0162245	0.0382327
PEX3	181.314	0.497618	0.163533	3.04293	0.0023429	0.00686646
GABARAPL2	1032.77	-0.221979	0.0812216	-2.73301	0.00627592	0.0165607
MYOC	0.725158	3.10727	2.66353	1.1666	0.243373	NA
SH3YL1	583.93	0.127992	0.106014	1.20731	0.227312	0.342308
FAM136A	545.528	0.267223	0.114448	2.33488	0.0195498	0.0449125
VCL	12182.9	0.167107	0.0607771	2.7495	0.00596864	0.0158465
DEPDC1B	143.205	-0.479266	0.191868	-2.4979	0.0124931	0.0305013
DAPK2	6.02887	-1.68018	0.916309	-1.83364	0.0667071	0.127566
NSMAF	592.313	-0.00456553	0.106279	-0.0429582	0.965735	0.979219
ADSS2	732.965	0.460618	0.100317	4.59162	4.39819e-06	2.17314e-05
STAP1	1.31326	0.200881	2.17787	0.0922372	0.92651	NA
TIMP2	2667.97	-0.037137	0.0691218	-0.537269	0.591082	0.703032
RFC1	1277.73	0.0545267	0.0784006	0.695488	0.486749	0.610996
TBC1D23	1280.94	0.245857	0.0808268	3.04177	0.00235188	0.00689019
CUL3	1061.16	-0.29385	0.0794926	-3.69658	0.000218527	0.000807244
MYOM2	27.5686	0.0654549	0.390867	0.167461	0.867008	0.916611
OTC	0	NA	NA	NA	NA	NA
CYP46A1	38.6705	-0.220864	0.387436	-0.570065	0.568634	0.683484
ZZZ3	899.613	-0.00765613	0.0935305	-0.081857	0.93476	0.96084
SLC18A1	3.56247	-2.484	1.35864	-1.8283	0.0675049	0.128697
USP2	44.3619	0.774864	0.322057	2.40598	0.016129	0.0380653
CASR	0.375326	2.15001	3.75687	0.572288	0.567127	NA
TUBG2	470.478	-0.289244	0.108654	-2.66206	0.00776633	0.0200153
RPL26L1	452.983	-0.117253	0.119617	-0.980231	0.326972	0.453856
FLT4	26.4907	-0.242985	0.415299	-0.585084	0.558491	0.675201
NSUN2	1071.64	0.0329613	0.093212	0.353617	0.723626	0.809609
FBXO42	590.64	0.0393505	0.101084	0.389287	0.697064	0.788271
MFAP3	983.735	-0.0167822	0.0824652	-0.203506	0.838739	0.896597
MRI1	262.004	0.331295	0.138128	2.39846	0.0164641	0.0387329
METTL1	137.058	1.33591	0.187363	7.13004	1.00343e-12	1.04392e-11
HOXC8	113.581	0.972333	0.222401	4.37197	1.23128e-05	5.66499e-05
AGA	254.245	0.0792957	0.152659	0.519429	0.603462	0.714049
PI4K2B	804.928	0.504729	0.102692	4.91499	8.87858e-07	4.88087e-06
BOD1L1	1586.82	-0.193651	0.0784935	-2.46709	0.0136214	0.0328849
MAT2B	1041.09	-0.169823	0.0813186	-2.08837	0.0367645	0.0769376
TLL1	1460.89	1.21327	0.0810155	14.9757	1.05779e-50	6.19325e-49
EDC4	914.972	0.181735	0.0943369	1.92645	0.0540483	0.106645
TRIO	2721.77	0.281266	0.0765552	3.67403	0.000238753	0.000876967
VCAN	23318.2	-0.37815	0.0698228	-5.41586	6.0995e-08	3.92049e-07
CLEC16A	727.332	0.51262	0.0951817	5.3857	7.21644e-08	4.59104e-07
MSR1	0.876292	-1.85327	2.39462	-0.773929	0.438973	NA
CDH1	119.457	-3.49501	0.269297	-12.9783	1.62524e-38	6.37568e-37
MTREX	1331.43	-0.0830521	0.0802927	-1.03437	0.300965	0.426111
DNAH5	15.6242	0.585132	0.517703	1.13025	0.258372	0.379179
ZFYVE16	1278.36	-0.492079	0.0806233	-6.10344	1.03809e-09	8.10386e-09
RIPOR1	661.172	0.0057385	0.0957806	0.059913	0.952225	0.970801
C6	1.40219	2.95212	1.9588	1.50711	0.131782	NA
RAI14	4574.17	0.802786	0.0604583	13.2784	3.09131e-40	1.31901e-38
SOX30	3.40431	1.44816	1.31099	1.10463	0.269319	0.391595
PNKP	451.91	-0.173565	0.111383	-1.55827	0.11917	0.205464
BEST2	2.3089	-0.20998	1.41471	-0.148427	0.882006	0.926595
PHLPP2	338.001	0.562219	0.134135	4.19143	2.77199e-05	0.000121063
SPDL1	556.329	0.269297	0.108634	2.47893	0.0131776	0.031942
STAU2	813.462	-0.543336	0.0931825	-5.83088	5.51353e-09	3.97536e-08
SLC66A1	332.548	-0.289708	0.127999	-2.26337	0.0236131	0.0529366
CTNS	402.089	0.106085	0.117918	0.899655	0.368304	0.496757
RTN4R	45.1488	-0.719728	0.323867	-2.22229	0.0262635	0.0579935
PHF23	913.723	-0.368271	0.0888883	-4.14307	3.42686e-05	0.000147716
CDH10	123.056	-0.53335	0.214065	-2.49153	0.0127195	0.0309665
INPP4A	700.605	-0.00803288	0.10556	-0.0760977	0.939341	0.963655
RAB27B	106.318	0.603615	0.224185	2.69249	0.00709207	0.0184602
PSMA4	2267.2	-0.289638	0.0704244	-4.11275	3.90971e-05	0.000166639
MYO16	10.8313	0.0803843	0.625744	0.128462	0.897783	0.936634
LSG1	650.573	0.421699	0.114182	3.69322	0.000221436	0.000817602
PARP3	138.674	0.22181	0.191872	1.15603	0.247668	0.366782
TNC	33091.3	1.63679	0.059428	27.5424	5.46286e-167	3.54494e-164
THAP3	192.321	-0.228838	0.161726	-1.41497	0.157077	0.255811
RIPOR3	46.17	-0.45188	0.369117	-1.22422	0.22087	0.33507
TDP1	266.141	-0.304065	0.136473	-2.22802	0.025879	0.0572581
AIFM2	265.639	0.438928	0.136655	3.21195	0.00131839	0.00409342
SPATA7	187.623	-0.618703	0.172556	-3.58553	0.000336397	0.00119859
MED17	76.2057	-0.172923	0.266187	-0.649628	0.515932	0.637253
RETSAT	535.16	0.122047	0.101823	1.19862	0.230674	0.346519
CAPG	701.506	0.318263	0.0989104	3.21769	0.00129226	0.00402434
AP2S1	1686.41	0.180053	0.0927955	1.94032	0.052341	0.103863
USH2A	3.88315	0.5635	1.15916	0.48613	0.626875	0.732459
ZPBP	0	NA	NA	NA	NA	NA
TG	25.3881	0.704995	0.439225	1.60509	0.108474	0.190374
ADAM28	20.9251	0.0166813	0.528208	0.0315809	0.974806	0.984909
BARX2	8.09411	0.0735352	0.704837	0.104329	0.916908	0.950411
DCUN1D1	744.454	-0.149356	0.104098	-1.43476	0.151355	0.248526
JADE2	510.527	0.186759	0.110006	1.69771	0.0895621	0.162664
ZIC2	5.03878	-1.58782	0.996592	-1.59325	0.111104	0.194201
LCP2	0.440605	-2.15202	3.21621	-0.669116	0.503421	NA
TRIT1	349.905	-0.271216	0.122393	-2.21595	0.0266949	0.058771
ADRB1	4.82695	-5.59175	1.46108	-3.82715	0.000129637	0.00049999
GUCA2B	0	NA	NA	NA	NA	NA
CUL7	989.651	-0.229788	0.0811582	-2.83136	0.00463501	0.0126753
CTNNA1	7391.21	0.178337	0.054019	3.30137	0.000962139	0.00308193
PHKA2	291.546	0.436306	0.139713	3.12288	0.00179089	0.00539171
CNTLN	324.849	0.117331	0.134217	0.874185	0.382017	0.509966
EPHA3	1276.21	3.53872	0.0958874	36.9049	3.85475e-298	1.20068e-294
HSPA5	29111.4	0.222362	0.050285	4.42204	9.77753e-06	4.57146e-05
DSG2	3284.18	-0.344153	0.0626891	-5.48983	4.0231e-08	2.65154e-07
GEMIN8	215.61	0.0312028	0.152655	0.204401	0.83804	0.896158
OFD1	389.383	-0.240557	0.124541	-1.93154	0.0534161	0.105692
GPM6B	101.633	-1.70906	0.222821	-7.6701	1.71862e-14	2.05575e-13
MAGEC2	0	NA	NA	NA	NA	NA
PREX2	6.61487	-1.86058	0.881117	-2.11162	0.0347191	0.0732136
WDR37	682.072	0.0869438	0.0901124	0.964837	0.334626	0.46242
YTHDC2	1233.1	0.153485	0.0884684	1.73492	0.0827558	0.152471
CTPS2	398.929	-0.225863	0.117001	-1.93044	0.0535521	0.10591
ATP6V1H	782.5	-0.146773	0.103601	-1.41672	0.156566	0.255084
POLR2B	2519.15	-0.315829	0.0640477	-4.93115	8.17466e-07	4.52585e-06
FAM214A	741.422	-0.535239	0.0973427	-5.4985	3.83026e-08	2.53194e-07
ARAP2	64.6675	0.691896	0.279876	2.47215	0.0134304	0.0324841
TPR	3466.38	-0.0773678	0.0648212	-1.19356	0.232651	0.348865
CP	4.04311	3.00022	1.23527	2.4288	0.0151487	0.0360303
KIAA0556	457.078	0.0979185	0.112039	0.873967	0.382136	0.510061
DTNBP1	173.498	-0.0326438	0.163693	-0.199421	0.841934	0.898172
XK	20.869	0.800143	0.536458	1.49153	0.135823	0.227672
ANO2	8.56701	-1.5488	0.762217	-2.03197	0.0421563	0.0863757
C12orf4	452.418	0.246093	0.118065	2.08439	0.0371247	0.0775769
SCML1	422.094	0.739408	0.11556	6.39848	1.56933e-10	1.3247e-09
WWC3	346.991	-0.154512	0.12773	-1.20968	0.226403	0.341302
ARHGAP6	193.937	0.469574	0.205779	2.28193	0.0224935	0.0506869
FAM184B	12.1132	0.0674274	0.600763	0.112236	0.910636	0.946493
MAP4	10207.7	0.560178	0.0613607	9.12927	6.89624e-20	1.20271e-18
GOPC	810.321	0.673254	0.0970971	6.93382	4.09622e-12	4.01982e-11
ROS1	2.6854	2.92048	1.51126	1.93248	0.0532999	0.105476
USP28	770.716	0.829711	0.0964861	8.59928	8.02152e-18	1.24429e-16
HDAC9	177.683	-1.4347	0.182464	-7.86291	3.75313e-15	4.8029e-14
TSPAN17	869.405	0.26977	0.0904267	2.98329	0.00285163	0.00821671
NOP16	137.084	-0.0439034	0.194457	-0.225774	0.821377	0.884263
CC2D2A	504.547	-0.108346	0.102994	-1.05196	0.292818	0.417041
RRM2B	1548.67	-0.441199	0.0765893	-5.76058	8.38232e-09	5.92584e-08
ZNF800	322.094	0.274114	0.143388	1.91169	0.0559157	0.1097
TNFRSF17	1.20637	-3.59868	2.05905	-1.74774	0.0805091	NA
SNX29	432.616	0.0399665	0.114532	0.348953	0.727124	0.812064
LMO3	24.4175	0.365112	0.410448	0.889545	0.37371	0.501868
MRPS10	773.928	0.208585	0.0883696	2.36037	0.0182568	0.0423048
GUCA1A	1.31788	0.209815	2.0241	0.103659	0.91744	NA
RSF1	1697.11	-0.402363	0.0700801	-5.74148	9.38534e-09	6.61989e-08
VPS13D	996.558	0.434717	0.100634	4.31979	1.56181e-05	7.08936e-05
CELF2	601.599	1.22627	0.11278	10.8731	1.5482e-27	3.96573e-26
FAM120A	1647.5	0.509967	0.0712197	7.16049	8.03916e-13	8.39717e-12
R3HDM1	855.968	-0.0511787	0.0933583	-0.548197	0.583557	0.69701
COL9A2	55.3982	-1.35711	0.314148	-4.31996	1.56056e-05	7.08576e-05
KITLG	873.446	1.17887	0.0903351	13.05	6.35312e-39	2.53053e-37
ERCC8	240.883	0.3015	0.151461	1.99061	0.0465236	0.0941108
ADAMTS6	576.637	-0.78034	0.126763	-6.15589	7.46552e-10	5.90493e-09
H6PD	1779.16	0.4738	0.0749413	6.32228	2.57732e-10	2.14076e-09
VAMP3	2371.98	0.0770296	0.062788	1.22682	0.21989	0.333909
PER3	43.3246	-1.45764	0.359573	-4.05381	5.03892e-05	0.000210505
UTS2	4.85282	-0.98459	1.08947	-0.903731	0.366138	0.494617
TNFRSF9	63.2627	1.87807	0.304133	6.17518	6.60883e-10	5.2433e-09
EPN3	12.3634	-0.00740494	0.598238	-0.0123779	0.990124	0.993505
LTBP1	18429.1	2.60795	0.0754385	34.5706	6.99902e-262	1.09003e-258
RCN1	2027.98	-0.246759	0.0878772	-2.808	0.00498509	0.0135163
ELN	33.0656	-2.71983	0.441909	-6.15473	7.52066e-10	5.94552e-09
RFC2	288.044	0.37705	0.140477	2.68407	0.00727319	0.0188788
ARID1B	1359.79	-0.0429804	0.0769192	-0.558774	0.576316	0.690321
CLPTM1L	1206.88	0.018662	0.0893641	0.208831	0.83458	0.893684
NEDD4L	357.456	-0.403616	0.120513	-3.34915	0.000810597	0.00263829
FOXP3	6.67959	1.09783	0.814869	1.34725	0.177901	0.28263
PPP1R3F	25.4838	-0.863454	0.417752	-2.0669	0.0387433	0.0805054
HEXB	2008.71	-0.907999	0.0744869	-12.19	3.51216e-34	1.1969e-32
PTCD2	275.656	-0.0544825	0.136634	-0.398746	0.69008	0.783274
NEXMIF	10.2383	0.759755	0.699459	1.0862	0.277389	0.400042
JKAMP	965.333	-0.218289	0.0913778	-2.38887	0.0169005	0.0395563
DKK3	1451.74	-0.286696	0.0802382	-3.57306	0.000352836	0.00125172
ARHGEF5	68.7154	0.714628	0.253262	2.82169	0.0047771	0.0130204
NFE2L3	125.695	0.380837	0.207782	1.83287	0.0668225	0.127708
MCUR1	338.854	-0.274832	0.135647	-2.02608	0.042757	0.0874226
LIMA1	3636.75	0.881555	0.0843641	10.4494	1.47435e-25	3.43222e-24
LETMD1	884.89	0.0682676	0.0848503	0.804565	0.421071	0.548461
SLC4A8	602.701	0.235168	0.115838	2.03014	0.042342	0.0866765
LAMC3	293.65	-1.14046	0.136842	-8.33409	7.80986e-17	1.13674e-15
PTGER3	21.5213	1.51466	0.489146	3.09654	0.00195793	0.00583816
TNIP3	4.47931	1.11682	1.00597	1.11019	0.266918	0.38894
MAPK9	833.664	0.0853143	0.0855844	0.996845	0.31884	0.445067
COL23A1	29.9873	-2.87171	0.496229	-5.78707	7.16269e-09	5.08672e-08
BCAR1	1729.21	0.0428888	0.0729783	0.587693	0.556739	0.673867
FAM160A2	555.988	0.785364	0.098795	7.94943	1.87378e-15	2.46263e-14
HERPUD1	1807.24	1.07324	0.0724702	14.8094	1.27463e-49	7.21858e-48
HOMER3	209.6	-0.988011	0.176355	-5.60239	2.11411e-08	1.43277e-07
RAD51	181.053	0.887466	0.177729	4.99337	5.93359e-07	3.34818e-06
POLQ	187.006	0.650112	0.195727	3.32153	0.000895264	0.00288791
PIK3CB	344.76	0.440372	0.126099	3.49228	0.000478913	0.00165342
CYBA	1392.12	-0.515959	0.0855353	-6.03211	1.61833e-09	1.2373e-08
THOC3	350.083	-0.0509951	0.125995	-0.40474	0.685668	0.780143
HEBP2	544.574	-0.195128	0.124278	-1.5701	0.116393	0.201703
MPHOSPH9	609.708	-0.002757	0.111261	-0.0247797	0.980231	0.988107
PLEKHA5	495.26	-0.748535	0.108132	-6.92241	4.44039e-12	4.33908e-11
PRSS8	74.4437	-2.3762	0.304228	-7.81058	5.69261e-15	7.16129e-14
SIKE1	1244.37	0.112652	0.0807918	1.39434	0.163214	0.264065
RRP12	569.694	0.472862	0.110185	4.29152	1.77457e-05	7.9715e-05
FNIP2	1377.41	-1.40703	0.107178	-13.128	2.27736e-39	9.32771e-38
MSMO1	1051.53	-0.365762	0.100379	-3.64381	0.000268633	0.000978184
TTC17	1841.53	0.0617776	0.0707806	0.872804	0.38277	0.5106
ALX4	18.7659	1.45958	0.539748	2.70418	0.00684731	0.0178926
FSTL4	1.82214	-3.06428	1.8559	-1.6511	0.0987177	0.17625
FOXN3	1482.02	0.394259	0.0796419	4.95039	7.40648e-07	4.12548e-06
METTL24	41.0671	0.54308	0.326655	1.66255	0.096403	0.172851
AKR7A2	556.619	0.40267	0.102117	3.94321	8.03972e-05	0.000323876
MRTO4	535.284	0.427805	0.115834	3.69325	0.000221407	0.000817602
NNAT	32.9091	0.413558	0.358322	1.15415	0.248437	0.367581
USE1	223.705	0.177164	0.161806	1.09492	0.273552	0.396233
MCF2L2	80.7849	-0.0680132	0.241792	-0.281288	0.77849	0.851897
NRIP2	74.6849	1.24433	0.250634	4.96472	6.87999e-07	3.84598e-06
LAMA3	868.313	3.67562	0.293419	12.5268	5.32374e-36	1.91041e-34
AP5M1	716.841	-0.162461	0.0915726	-1.77412	0.0760438	0.142054
ANAPC4	564.338	0.0425221	0.0996791	0.42659	0.669678	0.767388
KCNQ1	3.38881	-0.106023	1.1177	-0.0948578	0.924428	0.955238
TRAPPC3	787.02	-0.159218	0.0937374	-1.69856	0.0894024	0.162439
THRAP3	3129.33	0.0151827	0.065668	0.231204	0.817156	0.881756
PHPT1	267.516	-0.692792	0.146355	-4.73363	2.20537e-06	1.14718e-05
ENTPD2	2.48304	1.36708	1.44539	0.945816	0.344243	0.471898
LY75	2.38795	-1.74796	1.44721	-1.20781	0.22712	0.342116
ARID4B	1246.32	-0.354039	0.0817986	-4.32818	1.50346e-05	6.83646e-05
OPN3	27.7934	0.870607	0.419815	2.07379	0.0380991	0.0793257
SDCCAG8	378.131	0.381816	0.12708	3.00453	0.00265995	0.0077086
PTPRN	643.069	-0.807747	0.116474	-6.93503	4.06139e-12	3.98815e-11
HHAT	235.658	-0.715527	0.148106	-4.83117	1.35731e-06	7.28923e-06
KIF1B	2153.22	-0.125443	0.0659063	-1.90335	0.0569951	0.111457
FOXC1	23.5725	0.811228	0.426798	1.90073	0.0573375	0.112018
TBC1D22A	368.918	0.41054	0.123936	3.31251	0.000924625	0.00297584
SYNE2	462.473	0.208918	0.110416	1.8921	0.0584783	0.113971
PLEKHH1	176.315	0.0190883	0.169352	0.112714	0.910258	0.946348
ATP9A	953.471	-0.025055	0.0855497	-0.292871	0.769621	0.84534
SPO11	0	NA	NA	NA	NA	NA
CBLN4	0	NA	NA	NA	NA	NA
CHRDL2	26.7197	3.55375	0.537424	6.61255	3.7775e-11	3.38303e-10
FAM168A	1200.38	-0.0804359	0.0767873	-1.04752	0.294862	0.419415
RELT	57.5822	-0.13835	0.28647	-0.482949	0.629132	0.73427
GALC	1047.94	-0.103648	0.0826641	-1.25385	0.209897	0.322642
NOP58	1036.64	0.452079	0.0801143	5.64293	1.67182e-08	1.14498e-07
SZRD1	1496.76	0.2897	0.0761376	3.80496	0.000141829	0.000543781
KCNH2	185.225	-0.669527	0.180466	-3.70999	0.000207269	0.000769856
CUL1	1275.91	-0.295986	0.0849692	-3.48345	0.00049499	0.00170064
FAM114A2	527.34	-0.049832	0.0998468	-0.499085	0.61772	0.724643
CYFIP2	1226.9	-0.131714	0.078271	-1.68279	0.0924161	0.166932
TAB2	1659.13	-0.35686	0.0752075	-4.745	2.08509e-06	1.08861e-05
GINM1	727.763	0.22315	0.0900134	2.47907	0.0131725	0.0319347
EIF2AK2	1256.9	0.491439	0.0826834	5.94362	2.7879e-09	2.08044e-08
USP36	746.818	0.554333	0.0900978	6.15256	7.62405e-10	6.0242e-09
KMT2C	1369.31	-0.116787	0.0810611	-1.44072	0.149663	0.245975
MCOLN3	172.64	-2.46955	0.194236	-12.7142	4.93204e-37	1.84201e-35
CCDC85A	23.7186	0.719463	0.474915	1.51493	0.12979	0.219426
PUM2	2099.5	-0.0803934	0.0686366	-1.17129	0.241482	0.359614
MRPL43	353.664	-0.407272	0.129576	-3.14311	0.00167165	0.00506013
ITIH4	2.92557	1.02625	1.35938	0.754938	0.450286	0.576754
ITIH1	0.359068	2.09562	3.823	0.548162	0.583581	NA
HPF1	489.567	-0.00179645	0.104631	-0.0171694	0.986301	0.991586
ZFR	1996.15	-0.306936	0.0698058	-4.397	1.09759e-05	5.09202e-05
ZNF280C	204.235	-0.570061	0.164065	-3.47461	0.000511595	0.00175343
NPFFR2	23.0146	-1.63698	0.473425	-3.45774	0.000544719	0.00185269
PHF21B	80.6327	-1.63307	0.2489	-6.56115	5.33942e-11	4.69808e-10
TRAF1	116.319	0.963259	0.209071	4.60733	4.07865e-06	2.02942e-05
RC3H2	1499.94	-0.164327	0.0755226	-2.17587	0.0295652	0.0641204
IL17RB	54.3939	0.376727	0.279786	1.34648	0.178147	0.282906
TRAF3IP2	361.887	0.688617	0.122277	5.63162	1.78526e-08	1.21785e-07
GYG2	882.411	-0.67015	0.0927986	-7.22155	5.13971e-13	5.47135e-12
DCBLD2	2437.69	-0.163138	0.0771588	-2.11432	0.0344878	0.0728585
SERPINB3	0	NA	NA	NA	NA	NA
SOAT1	899.372	-0.090711	0.0834784	-1.08664	0.277196	0.399949
PKP2	3501.65	0.423497	0.0807467	5.24476	1.56488e-07	9.52011e-07
MSH4	7.73285	1.17665	0.757826	1.55267	0.120502	0.207232
F7	17.5922	1.26915	0.546861	2.3208	0.0202978	0.0463721
GDI2	5630.8	0.174242	0.0589661	2.95495	0.00312718	0.00893049
PRDM1	47.0791	-1.01038	0.324099	-3.11751	0.00182388	0.00547845
ATG5	472.03	-0.0979515	0.106549	-0.91931	0.357933	0.486682
TMCC3	809.798	-0.0727403	0.0887537	-0.819575	0.412458	0.540073
PITHD1	660.868	0.626925	0.0986592	6.35445	2.09176e-10	1.75145e-09
MTA3	1140.94	-0.578994	0.0782811	-7.39635	1.39975e-13	1.56382e-12
USP13	314.745	-0.0762414	0.13112	-0.581461	0.56093	0.677204
ATP11B	692.593	0.0671368	0.109975	0.610475	0.541547	0.660407
LAMC2	593.45	0.978191	0.13605	7.18992	6.48278e-13	6.82642e-12
CDK14	723.28	-0.725144	0.105656	-6.86323	6.73194e-12	6.48381e-11
SEC61A1	8612.81	0.232843	0.0522912	4.45282	8.47481e-06	4.00324e-05
PPP1R12A	2161.25	-0.254047	0.0689253	-3.68583	0.000227962	0.000840502
RASGRF1	8.34335	0.332516	0.738298	0.450382	0.652435	0.753883
CAMK2B	12.6373	1.82233	0.649555	2.80551	0.00502368	0.0136139
CROCC	564.45	-0.0775153	0.099397	-0.779855	0.435476	0.563205
POLR3E	491.35	0.308858	0.108993	2.83376	0.00460042	0.0125973
ATP2B4	6076.13	0.568044	0.0771051	7.36714	1.74333e-13	1.93518e-12
ZC3H11A	3.64543	-0.0716608	1.12426	-0.0637407	0.949177	0.969025
RIOK2	598.375	0.17219	0.114855	1.4992	0.133822	0.224923
YIPF1	403.391	-0.241215	0.116409	-2.07214	0.0382524	0.0795917
NDC1	542.157	0.343823	0.108762	3.16126	0.00157089	0.00478125
DGKG	25.6109	0.0478323	0.41017	0.116616	0.907165	0.944208
FLYWCH1	564.779	-0.00382363	0.100744	-0.0379539	0.969724	0.982283
UNKL	229.411	0.186076	0.144962	1.28362	0.199275	0.309297
TBXAS1	22.2842	-0.739238	0.4976	-1.48561	0.137383	0.229858
PARP12	80.4121	1.38333	0.256718	5.38854	7.10335e-08	4.5265e-07
ALDH18A1	3104.78	0.532945	0.0596035	8.9415	3.83932e-19	6.42942e-18
TARBP1	709.886	-0.0493917	0.08881	-0.556151	0.578108	0.691881
GATB	406.851	-0.320381	0.116784	-2.74337	0.00608126	0.0161098
MXD1	372.226	0.134321	0.1177	1.14121	0.253782	0.373714
CDK17	530.76	-0.460961	0.114401	-4.02935	5.59309e-05	0.000231544
DNAJC25	234.351	0.1873	0.142983	1.30994	0.190217	0.298152
SLC2A3	1214.68	-1.21007	0.0792336	-15.2722	1.17149e-52	7.21139e-51
PSD	159.666	0.115221	0.184391	0.624875	0.532053	0.651636
CTDP1	523.454	-0.0836643	0.108651	-0.770027	0.441284	0.56856
YBX3	5166.64	-0.492927	0.0789396	-6.24436	4.2553e-10	3.44449e-09
STYK1	34.5508	-0.363992	0.368433	-0.987945	0.323179	0.449834
WNK1	3959.92	-0.0483822	0.0762475	-0.634542	0.525727	0.646073
CCAR1	2431.97	-0.436868	0.062402	-7.00086	2.54387e-12	2.54453e-11
OGFR	670.85	-0.0228458	0.101172	-0.225812	0.821347	0.884263
GNA15	0.854498	-0.353894	2.39798	-0.14758	0.882674	NA
CREB3L3	1.05235	-3.40095	2.33064	-1.45924	0.1445	NA
PIGV	179.791	-0.0907757	0.163759	-0.554325	0.579357	0.692922
PTPRU	1053.17	-0.155549	0.0956505	-1.62622	0.103903	0.183906
SNRNP40	707.053	-0.0830374	0.0949546	-0.874496	0.381848	0.509807
RIMBP2	69.6547	1.20569	0.259629	4.64389	3.41906e-06	1.72493e-05
COL11A1	15277.6	1.58437	0.0614438	25.7858	1.2809e-146	5.86728e-144
QSER1	1050.05	-0.145642	0.0848688	-1.71609	0.0861458	0.157654
MPC1	387.396	-0.073321	0.123903	-0.59176	0.554011	0.671305
ACAA1	515.327	0.378788	0.110928	3.41471	0.000638505	0.00213713
BCAT1	7174.91	1.12864	0.0658069	17.1508	6.20433e-66	5.39812e-64
HDAC7	1530.25	-0.429345	0.0716749	-5.99017	2.09618e-09	1.58707e-08
LZTS1	250.236	-0.480688	0.169402	-2.83756	0.00454601	0.0124669
PRDM6	637.229	0.000357443	0.0989763	0.0036114	0.997119	0.998188
WNT8A	0.325772	-1.69356	3.64077	-0.465167	0.641812	NA
SPAG4	45.9082	0.392486	0.316377	1.24057	0.214766	0.328208
NCKAP1	4720.18	-0.155353	0.0565582	-2.74678	0.00601841	0.0159569
MRPS35	932.293	0.214064	0.0810451	2.64129	0.00825908	0.0210968
GUCY1B1	364.173	0.0337284	0.128664	0.262143	0.793211	0.863624
SFSWAP	964.812	0.00415192	0.0834846	0.0497328	0.960335	0.97563
TNK2	567.201	-0.330482	0.104387	-3.16592	0.00154593	0.00471715
MON2	1555.15	0.18989	0.0712809	2.66396	0.00772257	0.0199158
CDH3	1894.99	1.72191	0.0702073	24.526	7.80001e-133	2.75773e-130
ARSF	0.306181	-1.61588	3.7281	-0.433433	0.6647	NA
GPBP1	1382.49	-0.305433	0.0749991	-4.07249	4.65139e-05	0.000195733
DGAT2	30.7726	1.27788	0.416425	3.06869	0.00215001	0.00635495
ZNF112	97.9785	0.0485726	0.21271	0.228352	0.819373	0.882937
CS	2671.17	-0.466049	0.066738	-6.98326	2.88414e-12	2.87565e-11
LTK	22.1372	-2.94669	0.561675	-5.24625	1.55228e-07	9.44715e-07
MRPS24	2.89963	0.715289	1.20609	0.593066	0.553137	0.670706
ELMO2	632.967	-0.00177913	0.0944311	-0.0188405	0.984968	0.990757
WAPL	1187.36	-0.207742	0.082501	-2.51805	0.0118006	0.0289969
VMP1	3845.21	-0.142818	0.0679889	-2.1006	0.0356759	0.0749618
APPBP2	1797.24	0.439302	0.0746525	5.88462	3.98974e-09	2.92268e-08
POLD1	418.569	-0.0540628	0.116973	-0.462183	0.64395	0.746919
SEZ6	10.6705	2.29157	0.691432	3.31424	0.000918917	0.00295992
EIF4B	7462.03	-0.508025	0.0612889	-8.28902	1.14188e-16	1.63754e-15
SLC6A16	163.012	-1.57768	0.188019	-8.39106	4.81798e-17	7.09889e-16
BICRA	397.977	-0.341785	0.117003	-2.92116	0.00348734	0.00984087
SPHK2	245.417	-0.153869	0.160713	-0.957417	0.338357	0.466169
RPL18	7527.26	-0.149093	0.0639062	-2.33299	0.0196484	0.0450936
CA11	188.912	-0.289129	0.18491	-1.56362	0.117906	0.203532
ISOC2	510.442	0.671134	0.130684	5.13554	2.81336e-07	1.65716e-06
U2AF2	2857.44	-0.119892	0.0643377	-1.86347	0.0623956	0.120524
EPN1	1580.24	0.218345	0.0708242	3.08291	0.00204985	0.0060843
MED29	853.677	0.41585	0.0929847	4.47224	7.74051e-06	3.68094e-05
AHRR	12.0448	0.416807	0.611957	0.681105	0.495805	0.619319
GSC2	0	NA	NA	NA	NA	NA
ZNF275	738.752	0.639352	0.0985729	6.48609	8.80955e-11	7.62222e-10
MTMR1	451.321	0.205905	0.112706	1.82692	0.0677116	0.128968
GPC1	2089.38	0.429794	0.0674859	6.36866	1.90686e-10	1.60008e-09
ADCK1	126.69	0.336022	0.197395	1.70228	0.0887026	0.161479
HAGH	299.281	0.258105	0.134006	1.92607	0.0540953	0.106724
RNF4	1143.91	0.138543	0.0774235	1.78942	0.0735478	0.138037
CASP8	369.262	-0.190551	0.115229	-1.65368	0.0981935	0.175495
LIMCH1	383.393	1.88417	0.130953	14.3881	6.14891e-47	3.21353e-45
INTS13	641.8	0.0170756	0.104269	0.163765	0.869916	0.918249
TM7SF3	1160.79	-0.0844091	0.08814	-0.957671	0.338229	0.466033
DLX3	3.29374	-2.34832	1.33581	-1.75798	0.0787516	0.146253
SPA17	11.9993	-0.5486	0.603571	-0.908924	0.36339	0.49204
TSPAN32	3.82984	-1.04843	1.18467	-0.884994	0.37616	0.504028
CCN5	1.03388	2.45908	2.25862	1.08875	0.276262	NA
DMRT3	0	NA	NA	NA	NA	NA
ST3GAL6	146.372	-0.849645	0.18593	-4.56969	4.88443e-06	2.39666e-05
ATP2C2	11.1344	0.498537	0.646313	0.771355	0.440496	0.567764
NGFR	42.9721	1.5744	0.349516	4.5045	6.65302e-06	3.2039e-05
CDON	213.494	0.377603	0.163827	2.30489	0.0211726	0.0480883
TAF2	968.08	-0.0554493	0.0994574	-0.557518	0.577174	0.690939
HIPK2	1346.86	-0.199241	0.0898715	-2.21696	0.0266259	0.0586606
TNPO3	1575.35	0.186788	0.0741253	2.51989	0.0117391	0.0288823
BORCS8-MEF2B	0.82119	0.869584	2.30038	0.378018	0.705417	NA
RFXANK	485.761	-0.213214	0.109058	-1.95505	0.0505769	0.100985
TMEM161A	426.375	-0.15122	0.115253	-1.31207	0.189497	0.297316
LPAR2	151.933	-1.25614	0.18173	-6.91211	4.77498e-12	4.65366e-11
CTSA	2516.53	0.278349	0.071912	3.87069	0.000108527	0.000425208
SUGP2	2704.18	-0.302431	0.0709064	-4.26521	1.99714e-05	8.89943e-05
SLC12A2	467.179	0.398905	0.135233	2.94975	0.00318032	0.00905904
SNX24	441.668	0.0697157	0.114331	0.60977	0.542014	0.660873
EYA2	13.2238	-1.20904	0.610861	-1.97924	0.0477891	0.0964452
CNN2	6262.08	0.84811	0.0633464	13.3884	7.06423e-41	3.08175e-39
ABCA7	533.952	-0.675791	0.114454	-5.9045	3.53713e-09	2.61449e-08
SNCAIP	895.739	1.1394	0.107861	10.5636	4.39388e-26	1.05116e-24
DDX20	462.083	-0.00984907	0.108005	-0.0911909	0.927341	0.957084
BTBD1	1499.47	-0.127313	0.0779305	-1.63368	0.102327	0.18157
FAR2	128.521	0.918996	0.197913	4.64345	3.42644e-06	1.72809e-05
BCAS1	2.44543	-1.8242	1.47776	-1.23444	0.21704	0.330548
POU1F1	0	NA	NA	NA	NA	NA
CHI3L2	1.85937	1.0356	1.49762	0.691497	0.489253	0.613299
SBNO2	768.793	0.239401	0.0877371	2.72861	0.00636012	0.0167573
PMS1	443.386	-0.0905012	0.107218	-0.844086	0.398622	0.526336
HMG20B	570.799	-0.743138	0.104358	-7.12102	1.07128e-12	1.10858e-11
CALCRL	50.7823	-2.14514	0.339377	-6.32081	2.60199e-10	2.16009e-09
TAF11	829.982	-0.186601	0.0860529	-2.16845	0.0301247	0.0651704
ANKS1A	866.691	-0.760679	0.0861729	-8.82736	1.07175e-18	1.74596e-17
AP3D1	3306.4	0.239204	0.0609428	3.92506	8.67096e-05	0.000347329
ZNF76	530.414	-0.321315	0.108439	-2.96309	0.00304572	0.00872429
SLC9A3R2	233.739	-0.076134	0.151266	-0.503312	0.614745	0.722623
NTHL1	124.966	0.382858	0.191898	1.99511	0.0460311	0.0932113
UHRF1BP1	1002.69	0.689658	0.0832673	8.28246	1.20656e-16	1.72553e-15
GNAI3	1834.48	-0.0819927	0.0708981	-1.15649	0.247482	0.366621
IPO5	3540.35	0.211177	0.0598058	3.53105	0.00041391	0.00144957
OAT	2266.64	0.11475	0.0673531	1.70371	0.0884355	0.161087
WDR3	536.267	0.0167089	0.0995361	0.167868	0.866687	0.91643
PKN2	1787.72	-0.602245	0.0701353	-8.5869	8.93479e-18	1.38046e-16
WDR18	571.962	-0.00790509	0.098932	-0.0799043	0.936313	0.961772
TRAM2	2165.82	0.516383	0.0684687	7.54187	4.63263e-14	5.39631e-13
NTN1	25.2085	0.163637	0.455348	0.359367	0.71932	0.806123
GLP2R	3.31557	1.7648	1.30598	1.35132	0.176593	0.281098
MCM10	207.618	0.776573	0.174504	4.45018	8.58002e-06	4.04802e-05
DGKA	908.228	-0.578508	0.0896877	-6.45025	1.11666e-10	9.54496e-10
ERBB3	32.6157	-1.42436	0.42226	-3.37319	0.000743029	0.00244319
ROPN1	0.172374	-0.716439	4.08047	-0.175577	0.860626	NA
ANKRD44	70.6537	-0.83804	0.258962	-3.23615	0.00121152	0.00379032
KARS1	2335.45	-0.0487695	0.0682116	-0.714974	0.474625	0.599498
ADAT1	378.375	0.357396	0.128634	2.7784	0.0054628	0.0146686
PDIA5	1938.34	-0.411637	0.0843006	-4.88297	1.04498e-06	5.69639e-06
TBC1D22B	222.811	0.087771	0.147793	0.593879	0.552593	0.670315
NDUFB4	940.335	-0.467217	0.100189	-4.66337	3.1107e-06	1.58011e-05
SPEN	1280.18	0.0841951	0.106567	0.790066	0.429489	0.556756
MYLK	1609.69	2.17285	0.0809199	26.8518	8.03007e-159	4.46644e-156
ZC3H15	1456.8	-0.0092491	0.0796988	-0.116051	0.907612	0.944423
MAP2K4	907.54	-0.304195	0.0908196	-3.34944	0.000809742	0.00263606
PACC1	195.974	-0.84076	0.167651	-5.01493	5.30532e-07	3.01661e-06
SNAP91	16.5551	0.632344	0.515947	1.2256	0.220349	0.33441
SLK	1010.28	-0.145992	0.0867759	-1.6824	0.0924909	0.167022
CYB5R4	259.706	-0.0447024	0.150387	-0.297249	0.766276	0.843024
COL17A1	12.7603	0.392329	0.572272	0.685563	0.492989	0.616543
GSTO2	74.7296	0.545224	0.258004	2.11324	0.0345803	0.0730143
SEC61A2	399.753	-0.123489	0.123231	-1.00209	0.316299	0.442509
PRKCQ	66.4422	-0.00403594	0.258405	-0.0156187	0.987539	0.992033
TLE2	99.7373	0.246689	0.232401	1.06148	0.288474	0.411986
ASB1	738.107	0.332705	0.0954584	3.48534	0.000491505	0.00169015
FAM107B	261.854	0.157653	0.138605	1.13742	0.255362	0.375543
ME1	900.712	0.394396	0.0849802	4.64104	3.46667e-06	1.7433e-05
TBC1D1	1284.58	-0.602868	0.0755586	-7.97882	1.47744e-15	1.95827e-14
CDK13	1119.2	-0.0375242	0.0942102	-0.398303	0.690407	0.783417
MTHFD2	2670.08	0.732871	0.0700952	10.4554	1.38462e-25	3.22816e-24
SLC9A7	412.213	0.432465	0.110922	3.89882	9.66629e-05	0.00038306
FOXJ2	587.385	0.514371	0.102138	5.03604	4.7526e-07	2.71622e-06
YBX1	10408.2	-0.474152	0.0592815	-7.99831	1.26138e-15	1.68047e-14
PDE4A	92.9834	-0.44432	0.220382	-2.01614	0.0437853	0.0892322
PPP2R5A	562.123	0.659954	0.109108	6.04865	1.46067e-09	1.12338e-08
CTNNA2	14.7711	0.847223	0.561115	1.50989	0.131071	0.221208
ELAVL1	1396.62	-0.107061	0.0781043	-1.37074	0.170456	0.273284
TIE1	5.47973	-1.99422	1.02899	-1.93803	0.0526191	0.104301
DIP2B	1358.85	-0.387205	0.100343	-3.85882	0.000113938	0.000443838
SMARCD1	1233.42	-0.288312	0.0772734	-3.73107	0.00019067	0.000713649
KDM4A	461.608	-0.362343	0.116571	-3.10834	0.00188144	0.00563059
NFYC	417.499	-0.10328	0.110268	-0.93663	0.348949	0.477258
ZMYND12	4.40917	-0.561066	1.04973	-0.534484	0.593007	0.704585
SLC9A3	46.2824	0.718528	0.332292	2.16234	0.030592	0.0659433
NGEF	12.6746	-1.41235	0.627889	-2.24936	0.0244897	0.0546657
ASPM	650.773	-0.358029	0.125694	-2.8484	0.00439391	0.0120945
CD84	0	NA	NA	NA	NA	NA
ELOVL1	1000.8	0.516708	0.0823637	6.27349	3.53053e-10	2.88481e-09
SPI1	1.95593	2.31099	1.87052	1.23548	0.216651	0.330116
ZNRD1	44.1311	-0.181729	0.353842	-0.513588	0.60754	0.717077
MPPED2	80.31	-0.545221	0.266591	-2.04516	0.0408391	0.0840973
CLDN18	34.1229	1.33467	0.382874	3.48594	0.000490414	0.00168752
ZBTB11	724.894	-0.15586	0.101956	-1.52869	0.126342	0.215043
ATXN3	465.917	-0.325303	0.11107	-2.9288	0.00340274	0.00962308
GOLGA5	1244.21	-0.0336632	0.0818613	-0.411222	0.68091	0.776715
FGFR2	4549.25	0.973554	0.0871145	11.1756	5.37098e-29	1.4675e-27
LRRC40	528.524	-0.507478	0.105297	-4.81947	1.43937e-06	7.70867e-06
ISOC1	346.027	0.0729494	0.150923	0.483356	0.628843	0.734189
EML1	379.031	1.26873	0.121051	10.4809	1.05712e-25	2.47573e-24
TRMT11	313.483	-0.595739	0.128733	-4.62772	3.69709e-06	1.85021e-05
THUMPD1	940.809	-0.0124001	0.0872882	-0.142059	0.887034	0.929654
MSANTD3	313.842	-0.803524	0.134264	-5.98465	2.1685e-09	1.63625e-08
KIF26A	423.599	0.105601	0.115241	0.916355	0.359481	0.488222
ATG2B	790.483	0.00182869	0.0919121	0.0198961	0.984126	0.990153
ARFGEF1	1382.12	-0.115251	0.0867328	-1.3288	0.183913	0.290409
ACSM2B	0	NA	NA	NA	NA	NA
ZFAT	141.947	-0.568637	0.187529	-3.03226	0.00242728	0.00708308
MTFR1	513.47	-0.344051	0.105362	-3.26543	0.00109296	0.0034548
STAG3	120.595	-0.111624	0.193207	-0.577741	0.563439	0.678963
FECH	756.216	0.464755	0.0919308	5.05549	4.29288e-07	2.46797e-06
MYO9A	622.936	0.199519	0.101705	1.96175	0.0497921	0.099738
DDX3Y	2559.29	-0.278555	0.0686633	-4.05682	4.97448e-05	0.000207924
PFKP	6552.12	-0.403908	0.075824	-5.32691	9.98968e-08	6.27083e-07
IDI1	995.813	-0.647315	0.085829	-7.54191	4.63126e-14	5.39631e-13
SP100	172.587	1.10069	0.165929	6.63348	3.27866e-11	2.95497e-10
KLF6	1882.73	-0.113877	0.0737114	-1.54491	0.122369	0.209817
PLPP1	308.453	-1.38175	0.134617	-10.2643	1.02049e-24	2.26398e-23
NEO1	796.583	0.0332217	0.0934447	0.355522	0.722198	0.808302
TRAM1	4327.08	0.299522	0.0584932	5.12062	3.04528e-07	1.78566e-06
PHKA1	1132.02	-0.771814	0.0858914	-8.98593	2.56551e-19	4.32417e-18
TNFRSF1A	2276.73	0.849034	0.0664584	12.7754	2.24928e-37	8.52317e-36
CACNB1	142.722	0.0447817	0.178165	0.25135	0.801544	0.870337
EVI5	1548.69	-0.303718	0.0799864	-3.79713	0.000146383	0.000559453
STOML1	136.082	0.546212	0.191964	2.84538	0.00443579	0.0122012
PKM	16201.5	-0.0926433	0.0614644	-1.50727	0.131742	0.222007
DHX29	858.771	0.424103	0.0878151	4.8295	1.36875e-06	7.34557e-06
DNTTIP2	905.81	0.103757	0.0838382	1.23759	0.215868	0.329481
METTL22	533.95	-0.18344	0.104403	-1.75704	0.0789107	0.146478
TP53BP1	2075.27	-0.262218	0.0761829	-3.44195	0.000577528	0.00195361
TRO	2070.8	-0.892834	0.0653447	-13.6634	1.67843e-42	7.64324e-41
RRP15	384.478	0.762572	0.12573	6.06514	1.31843e-09	1.01851e-08
RHOA	8178.51	0.107522	0.0569911	1.88664	0.0592084	0.115192
DHX8	983.003	-0.0274499	0.0838525	-0.32736	0.743396	0.823349
PRKCZ	174.939	0.322333	0.179901	1.79172	0.0731777	0.137442
ZFY	400.326	0.0956018	0.114669	0.833717	0.40444	0.532034
IARS2	1609.85	-0.220903	0.0739498	-2.9872	0.00281541	0.00812587
SYT1	205.926	-1.97229	0.173051	-11.3971	4.32097e-30	1.24851e-28
NAV3	461.356	1.03692	0.12254	8.46187	2.63114e-17	3.93635e-16
IDH3G	550.687	-0.409687	0.10388	-3.94383	8.019e-05	0.000323125
ROGDI	235.868	0.597156	0.153388	3.89311	9.89683e-05	0.000391698
PDZD4	189.923	0.266257	0.162276	1.64076	0.100847	0.179454
ATP2B3	2.32529	0.229071	1.48234	0.154534	0.877189	0.923375
ROCK1	1840.56	0.0253788	0.0707381	0.358771	0.719766	0.806487
CBFB	973.181	-0.495105	0.0809773	-6.11412	9.70933e-10	7.60247e-09
PDK3	236.948	-0.271253	0.147858	-1.83456	0.0665714	0.127322
HYAL2	492.107	-0.964169	0.121951	-7.90618	2.65404e-15	3.4445e-14
HDAC4	491.342	0.691493	0.120137	5.75586	8.62002e-09	6.08835e-08
RASSF1	379.577	0.468632	0.138933	3.37309	0.000743298	0.00244325
FGFR3	143.713	-1.30054	0.219796	-5.91704	3.27787e-09	2.43093e-08
IFI35	76.2382	1.26202	0.25536	4.94212	7.72794e-07	4.29226e-06
HEATR6	473.439	0.00445654	0.106513	0.0418402	0.966626	0.979993
COASY	544.782	-0.368965	0.113532	-3.24988	0.00115452	0.00363022
PLEKHH3	275.966	-0.583232	0.140777	-4.14295	3.42864e-05	0.000147752
MEF2A	772.529	-0.124858	0.0940091	-1.32814	0.184131	0.29069
OTUD5	1212.37	0.14662	0.0828694	1.76929	0.0768449	0.143259
TFE3	960.403	0.212411	0.0916263	2.31824	0.0204364	0.0466202
TBC1D25	183.971	-0.0398971	0.166535	-0.239572	0.810662	0.877437
ACSL4	1357.69	-0.148704	0.0751731	-1.97815	0.0479117	0.096655
INPP5A	472.843	0.0270258	0.111144	0.24316	0.807881	0.875434
GPKOW	342.478	-0.305214	0.124742	-2.44676	0.0144148	0.0345805
GRIPAP1	1002.79	-0.10293	0.0884329	-1.16394	0.244449	0.362922
FTSJ1	773.07	0.354563	0.0865379	4.0972	4.18173e-05	0.000177214
PRR11	541.181	0.296823	0.115041	2.58015	0.00987577	0.0247395
REEP1	41.4949	0.52754	0.386294	1.36565	0.17205	0.275358
ATP11A	1435.77	0.093113	0.0909504	1.02378	0.30594	0.431841
POLR1A	1494.5	0.650134	0.0832499	7.80942	5.74512e-15	7.22151e-14
LAPTM4A	4480.62	-0.385884	0.064983	-5.93824	2.88106e-09	2.1479e-08
TTC7A	327.615	0.624138	0.127115	4.91003	9.1062e-07	4.99366e-06
IP6K2	2174.13	-0.523459	0.0692705	-7.55674	4.13308e-14	4.83974e-13
STON1-GTF2A1L	0.501005	1.15883	2.92818	0.395749	0.69229	NA
SRBD1	412.888	-0.206455	0.110624	-1.86628	0.0620025	0.119939
KIF2A	992.402	-0.423127	0.0831631	-5.08791	3.62023e-07	2.10536e-06
RASGRP2	30.4025	-0.134492	0.400265	-0.336008	0.736865	0.818392
PSME4	2324.01	-0.341152	0.0795599	-4.28799	1.80295e-05	8.0867e-05
IFT80	312.22	-0.59641	0.141266	-4.22189	2.42262e-05	0.000106702
SIRT2	695.395	-0.0980012	0.103018	-0.951302	0.341451	0.469534
ERLEC1	1838.52	-0.0275299	0.0673843	-0.408551	0.682869	0.778095
PPP2R5B	380.048	0.0208287	0.116924	0.178138	0.858615	0.910813
PYGM	65.0164	0.282285	0.278575	1.01332	0.310907	0.437167
PAGE1	0	NA	NA	NA	NA	NA
PITX1	1479.47	-1.14637	0.111433	-10.2875	8.02446e-25	1.78533e-23
TRPC7	5.97386	0.811114	0.840566	0.964962	0.334564	0.462382
MAST4	532.943	0.935745	0.103062	9.07944	1.09137e-19	1.88229e-18
ADGRF5	1.63054	-2.91684	1.9692	-1.48123	0.138544	0.231487
SDK2	568.488	-0.14243	0.116103	-1.22676	0.219914	0.333913
ADAM7	0.287206	-1.53953	3.82193	-0.402816	0.687084	NA
NUP133	1138.69	-0.276995	0.0803836	-3.44592	0.000569117	0.00192977
NUCKS1	7303.29	-0.103825	0.060442	-1.71776	0.0858396	0.157278
VPS35	2402.42	-0.165896	0.0718326	-2.30948	0.0209169	0.047554
DNAJA2	1290.18	-0.226459	0.0779246	-2.90613	0.00365928	0.0102628
BCL3	419.357	0.810632	0.120927	6.7035	2.03488e-11	1.862e-10
KCNAB2	75.8084	0.019257	0.244574	0.078737	0.937242	0.962329
ABCC9	527.258	1.84877	0.129713	14.2528	4.30958e-46	2.15812e-44
GAL	275.493	-2.72209	0.196133	-13.8788	8.51873e-44	3.9961e-42
CLEC2D	178.865	-0.750335	0.178728	-4.1982	2.69049e-05	0.000117767
FUNDC1	235.311	-0.562235	0.149637	-3.75733	0.000171737	0.000647925
MAOB	5.83547	-0.0275416	0.958342	-0.0287388	0.977073	0.986065
RORA	123.463	-0.799422	0.226033	-3.53676	0.000405071	0.00141989
DRD4	21.0769	-1.09703	0.484329	-2.26505	0.0235096	0.052736
TGFBR3	2822.07	0.523914	0.192001	2.7287	0.00635843	0.0167557
PLA2G10	1.11591	-0.105571	1.92239	-0.0549163	0.956205	NA
HES2	8.31178	-2.49595	0.887554	-2.81217	0.00492082	0.0133584
ATP1B3	1648.28	-0.87858	0.0845044	-10.3969	2.56237e-25	5.87722e-24
NEDD4	720.511	-0.381863	0.0910825	-4.19249	2.75908e-05	0.000120567
PIGB	100.576	0.0329117	0.219512	0.149931	0.880819	0.925758
MAPK6	3273.64	0.187947	0.060544	3.10431	0.00190725	0.00569908
GNB5	210.606	0.445287	0.1679	2.65209	0.00799947	0.0205347
RAB27A	365.646	0.958501	0.132273	7.24636	4.28117e-13	4.59194e-12
HDHD5	375.581	0.0693689	0.115203	0.602146	0.547077	0.665535
UFD1	863.17	-0.0676869	0.0895074	-0.756216	0.44952	0.576246
LRP6	1123.45	-0.130749	0.0905557	-1.44385	0.148782	0.244862
GUCY2C	4.91119	-1.5219	0.978743	-1.55495	0.119958	0.206548
SCT	5.76676	1.59351	0.950821	1.67593	0.0937521	0.168934
PHRF1	1068.36	0.142352	0.0813933	1.74894	0.0803012	0.148758
ELP1	1067.2	0.166483	0.0900716	1.84834	0.0645531	0.124087
NUCB2	1853.23	0.502366	0.0723727	6.94137	3.88329e-12	3.82049e-11
PFN2	3413.19	-0.282651	0.0607771	-4.65063	3.3093e-06	1.67498e-05
PTPN3	146.013	0.0557399	0.189146	0.294693	0.768228	0.844346
SPTB	25.421	1.67581	0.502055	3.3379	0.000844133	0.00273886
DAPP1	184.206	6.05186	0.370541	16.3325	5.79768e-60	4.34102e-58
FGF10	25.088	-1.7924	0.460179	-3.89501	9.81933e-05	0.000388828
SLC44A1	790.769	-1.19971	0.0943948	-12.7095	5.23504e-37	1.94584e-35
TMEM260	368.852	0.0951203	0.12483	0.762002	0.446059	0.573131
SMG6	725.954	0.584115	0.0980257	5.95879	2.54116e-09	1.90453e-08
EXOC5	1650.34	-0.141119	0.0812636	-1.73656	0.0824647	0.151971
CLTCL1	294.536	0.12798	0.133996	0.955107	0.339524	0.467404
FGF22	5.65524	-0.276677	0.873257	-0.316833	0.75137	0.829917
FSTL3	1613.83	0.922966	0.0833976	11.0671	1.81269e-28	4.81754e-27
DGCR2	1433.13	0.255577	0.0778057	3.28481	0.00102053	0.00325043
RNF126	444.308	-0.0687348	0.107965	-0.63664	0.524359	0.64485
MNT	506.102	0.421773	0.115359	3.65619	0.000255996	0.000936327
ZXDC	473.558	0.262814	0.111089	2.3658	0.0179914	0.0417645
JMJD6	433.278	0.0180753	0.110411	0.163709	0.86996	0.918249
POLB	281.802	-0.849973	0.145459	-5.84339	5.11483e-09	3.69988e-08
ST6GALNAC1	1.4818	-0.0402699	1.80028	-0.0223687	0.982154	NA
WIPI1	956.915	0.373107	0.0842404	4.42907	9.46389e-06	4.43147e-05
FRMPD1	38.1506	2.90911	0.416505	6.98458	2.85709e-12	2.8505e-11
GBA2	900.792	-0.203552	0.0877348	-2.32009	0.0203362	0.0464391
NDST1	3072.54	0.455003	0.0704323	6.46015	1.04602e-10	8.95583e-10
ASNS	87.8162	1.41735	0.248465	5.70442	1.16743e-08	8.14585e-08
AP3M2	437.447	1.12587	0.112457	10.0115	1.35676e-23	2.82868e-22
CNGB1	1.01762	2.43831	2.26783	1.07517	0.282297	NA
ST6GALNAC2	4.87395	-2.52396	1.1499	-2.19494	0.028168	0.0615617
CHAT	39.1533	4.00102	0.498632	8.02399	1.02361e-15	1.37074e-14
PABPC1	15919.3	-0.397368	0.0579219	-6.86041	6.86634e-12	6.60509e-11
TESK2	50.4283	-0.79574	0.296656	-2.68236	0.00731041	0.0189596
CFAP20	314.778	-0.415409	0.131273	-3.16447	0.00155365	0.00473698
CSNK2A2	599.104	-0.0134986	0.0963166	-0.140148	0.888543	0.930672
PTPN21	615.993	0.0150563	0.0956785	0.157363	0.874958	0.921775
EIF2B3	373.136	0.435757	0.127707	3.41215	0.000644523	0.00215441
CAMK2A	395.213	0.0238594	0.144341	0.165299	0.868708	0.917729
TCOF1	1615.7	0.496289	0.0698574	7.10431	1.20921e-12	1.24223e-11
CDC42	5466.66	0.00445461	0.0591998	0.075247	0.940018	0.964035
OSBPL3	405.181	0.176805	0.126277	1.40014	0.161472	0.261736
EPHA8	0.656013	0.211912	2.66131	0.0796271	0.936534	NA
SLC12A3	1.43202	0.141183	1.97909	0.0713371	0.943129	NA
RAD18	319.449	1.0559	0.133828	7.88996	3.02288e-15	3.90044e-14
ATP2B1	5414.5	0.108248	0.0609403	1.77629	0.0756849	0.141458
TRPM5	2.09057	0.662092	1.4985	0.441836	0.658608	0.75865
NCK2	457.447	-0.292167	0.109498	-2.66824	0.00762506	0.0196871
MAP4K4	6365.47	-0.105234	0.055361	-1.90087	0.0573192	0.112006
MGAT4A	164.137	-2.28734	0.238657	-9.58421	9.31683e-22	1.77819e-20
RPL31	5404.94	-0.376423	0.0962664	-3.91022	9.22114e-05	0.000367571
WDR1	6645.31	0.521752	0.0767998	6.79366	1.09323e-11	1.0325e-10
SNX13	818.247	-0.0428291	0.0874134	-0.489961	0.624161	0.73011
MS4A12	2.94693	1.90192	1.35259	1.40613	0.159686	0.259301
ARHGAP10	613.655	0.326733	0.0943566	3.46274	0.000534697	0.00182298
RPS6KA2	996.136	1.21901	0.0957378	12.7328	3.88457e-37	1.45428e-35
ING3	196.468	-0.150023	0.154381	-0.971772	0.331164	0.458734
VASH1	610.59	0.382007	0.103919	3.67601	0.000236906	0.000871227
LMCD1	5178.45	2.03649	0.0831918	24.4794	2.44756e-132	8.28657e-130
BUD23	1272.5	-0.141893	0.0809472	-1.7529	0.0796183	0.147599
SEL1L	3565.95	0.606259	0.0727071	8.33838	7.53156e-17	1.09828e-15
TRIP13	398.278	0.359735	0.111993	3.21212	0.00131757	0.00409169
ATP6AP1	2825.69	-0.185872	0.0648678	-2.8654	0.00416482	0.0115189
TCF3	1499.66	-0.698763	0.0716568	-9.75152	1.81726e-22	3.60077e-21
TRIB2	212.257	-0.945369	0.175022	-5.40143	6.61135e-08	4.23551e-07
DAZAP1	1705.22	-0.0224825	0.0677748	-0.331724	0.740098	0.820933
MBD3	563.646	-0.139995	0.112343	-1.24614	0.212713	0.32587
PRLH	0	NA	NA	NA	NA	NA
HLTF	684.624	-0.326604	0.101527	-3.21691	0.00129579	0.00403372
FAM50A	1120.21	-0.0848101	0.085231	-0.995062	0.319706	0.446037
FAM3A	826.255	0.17327	0.101431	1.70826	0.0875878	0.159823
CPSF1	1649.76	-0.164973	0.0737389	-2.23726	0.0252693	0.0561404
MYO3B	31.734	3.43795	0.504654	6.81248	9.59272e-12	9.12626e-11
CYBRD1	1173.54	1.27588	0.103199	12.3633	4.12807e-35	1.43827e-33
CDH19	0	NA	NA	NA	NA	NA
PDCD2	771.089	-0.19173	0.0946091	-2.02655	0.0427082	0.0873343
SLC6A15	1472.38	-1.69509	0.0822133	-20.6182	1.88286e-94	3.08671e-92
RDH11	1242.83	-0.41835	0.0916653	-4.56388	5.02164e-06	2.45702e-05
PRKACA	762.26	0.155078	0.0975642	1.5895	0.111947	0.195412
ADGRL1	668.718	-0.00350185	0.107612	-0.0325414	0.97404	0.984511
SPP2	0.313341	0.245344	3.7379	0.0656369	0.947667	NA
ACTN1	12378.9	0.986018	0.0747525	13.1904	9.96107e-40	4.15908e-38
ZFYVE26	831.779	-0.125378	0.100564	-1.24675	0.212488	0.32568
RPS6KA6	254.799	-1.20879	0.14212	-8.50546	1.80873e-17	2.74554e-16
EPN2	390.435	0.479569	0.119827	4.0022	6.27574e-05	0.00025741
PTPN18	319.772	0.638008	0.144928	4.40225	1.07133e-05	4.98205e-05
LIMS2	822.081	0.538804	0.0853782	6.31079	2.77608e-10	2.29484e-09
ASIC4	53.8888	1.02714	0.301336	3.40862	0.000652927	0.00217838
SPEG	2308.31	0.930483	0.0726657	12.805	1.53766e-37	5.8695e-36
LNX1	55.2866	-1.37654	0.298637	-4.60941	4.03822e-06	2.01123e-05
ALDH3A2	1124.22	0.376085	0.0784108	4.79634	1.61587e-06	8.57722e-06
TFRC	5818.69	0.370668	0.0675816	5.48475	4.14051e-08	2.71971e-07
SREBF1	751.02	-0.409944	0.0950391	-4.31342	1.6075e-05	7.28826e-05
TRPC5	2.62735	0.29754	1.24571	0.238851	0.811221	0.877756
AFF4	4146.8	-0.31006	0.0782571	-3.96207	7.4304e-05	0.000301436
UBE2D1	489.515	-0.325926	0.108619	-3.00064	0.00269413	0.00779605
MPP5	1876.84	0.866909	0.0820728	10.5627	4.43817e-26	1.06012e-24
RHOBTB1	1147.16	-0.525638	0.0857695	-6.1285	8.87093e-10	6.98816e-09
SMC1A	1659.07	0.219681	0.0784553	2.80008	0.00510905	0.0138067
HSD17B10	692.612	0.129264	0.107394	1.20364	0.228728	0.344039
MARK2	559.763	-0.0719937	0.103528	-0.695404	0.486802	0.611014
HMMR	301.503	-0.522797	0.143203	-3.65073	0.000261491	0.00095441
CHFR	813.799	-0.0482418	0.0900376	-0.535796	0.5921	0.703921
TRHDE	105.257	1.75621	0.225263	7.79628	6.37589e-15	7.97575e-14
P4HA2	4361.63	0.468458	0.0567993	8.2476	1.61605e-16	2.28595e-15
FCGR2B	0	NA	NA	NA	NA	NA
NFATC3	398.008	0.431712	0.118458	3.64442	0.000267997	0.000976096
TRNT1	470.548	0.178807	0.106774	1.67464	0.0940056	0.169316
ACADVL	3736.44	-0.171062	0.0639998	-2.67285	0.00752108	0.0194477
STK10	594.282	0.101975	0.102646	0.993462	0.320485	0.446802
FBXW11	1278.13	-0.00617788	0.0790223	-0.078179	0.937686	0.962594
ACAP1	101.104	0.64339	0.212772	3.02384	0.00249585	0.00726685
CRMP1	1292.29	-0.645771	0.0819143	-7.8835	3.18344e-15	4.09742e-14
EVC	478.418	0.769757	0.127522	6.03628	1.57712e-09	1.20817e-08
DERL2	808.845	0.0510454	0.0894582	0.570606	0.568267	0.683359
SIDT1	1.59328	-1.83157	1.93876	-0.94471	0.344807	NA
NDE1	341.85	0.124747	0.125688	0.992511	0.320948	0.447289
IRAG1	139.284	2.32553	0.207415	11.2119	3.56342e-29	9.85731e-28
TMEM38A	27.7108	-0.521846	0.435384	-1.19859	0.230688	0.346519
AP1M1	1023.71	0.432413	0.0787072	5.49395	3.93046e-08	2.59377e-07
PVR	1759.15	0.59422	0.0849994	6.99087	2.73194e-12	2.72738e-11
XRCC1	189.341	-0.680303	0.166359	-4.08938	4.32531e-05	0.000182802
SCARB1	452.66	0.0106901	0.11171	0.0956951	0.923763	0.954785
CYP2W1	12.1623	0.988544	0.677541	1.45902	0.14456	0.239407
MCM2	506.71	1.0675	0.113044	9.4433	3.61229e-21	6.71335e-20
MOV10L1	31.6867	-0.702437	0.370024	-1.89836	0.0576491	0.112547
PANX2	166.974	0.514085	0.176033	2.92039	0.00349599	0.00986171
SELENOO	315.702	-0.418536	0.127523	-3.28204	0.00103061	0.00327698
TP63	3.96893	-3.33889	1.3828	-2.41459	0.0157531	0.0372815
ALPK1	92.6854	1.70277	0.232174	7.33403	2.23334e-13	2.45635e-12
LLGL2	382.119	-0.030434	0.134369	-0.226496	0.820816	0.88399
PDE8A	471.263	0.033767	0.1154	0.292608	0.769822	0.845494
CLCN4	274.161	-0.588871	0.134526	-4.37737	1.2012e-05	5.53638e-05
NLE1	342.793	0.545733	0.121661	4.48568	7.26813e-06	3.4754e-05
SDHA	48.2221	-0.00883192	0.322363	-0.0273974	0.978143	0.986632
SMARCE1	159.439	-0.167948	0.174302	-0.963548	0.335272	0.462902
FNDC8	5.56939	2.11549	1.02318	2.06756	0.0386812	0.0803978
GSDMB	472.461	0.166274	0.103882	1.6006	0.109465	0.191811
KDM5A	1296.69	0.147093	0.0769232	1.91221	0.0558495	0.109616
ADAM11	24.0097	0.658524	0.502041	1.31169	0.189624	0.297442
PPP2R3A	550.565	-1.16667	0.105891	-11.0177	3.14063e-28	8.27616e-27
FERMT2	4307.62	0.880214	0.0774109	11.3707	5.85319e-30	1.68498e-28
ABCB11	1.41114	0.116536	1.86967	0.0623301	0.9503	NA
DHRS9	77.1062	3.08661	0.322339	9.57568	1.01186e-21	1.92885e-20
CD5L	0.375326	2.15001	3.75687	0.572288	0.567127	NA
PTGS2	7.87163	0.415243	0.736649	0.563691	0.572964	0.687416
IGF2BP2	2293.85	-0.220019	0.0726694	-3.02767	0.00246445	0.00718078
MAP3K13	344.084	-0.0599101	0.12397	-0.483263	0.628909	0.734189
ST6GAL1	349.686	-1.02445	0.137501	-7.4505	9.2989e-14	1.05632e-12
TBX21	0.642942	0.423874	2.86252	0.148077	0.882282	NA
FRY	1338.25	3.03714	0.0992351	30.6055	1.03447e-205	8.4794e-203
PICALM	3966.6	-0.0571425	0.0684545	-0.834752	0.403857	0.531492
NSF	1221.93	0.381933	0.0807252	4.73128	2.2311e-06	1.1594e-05
GLI2	1193.93	0.338661	0.0851071	3.97923	6.91382e-05	0.000281653
CLASP1	1357.49	-0.431433	0.0731111	-5.90106	3.61169e-09	2.66454e-08
MRPS34	281.42	-0.297137	0.15606	-1.904	0.0569101	0.111319
NOTCH3	2278.03	-1.33159	0.0718026	-18.5452	8.92293e-77	1.04486e-74
CLNS1A	1121.87	0.0716278	0.0820168	0.873331	0.382483	0.510348
PPP2R2C	4.5128	0.608042	1.03661	0.58657	0.557493	0.674328
TEAD2	870.322	-0.841993	0.0853246	-9.86811	5.72309e-23	1.15906e-21
EED	340.163	-0.377957	0.130935	-2.8866	0.00389424	0.0108437
CDHR2	8.76738	0.907414	0.72855	1.24551	0.212945	0.326162
SNCB	0.753946	-1.58184	2.49377	-0.634317	0.525874	NA
TSG101	945.678	-0.291578	0.091464	-3.18789	0.00143313	0.00441185
NCBP3	1725.68	-0.0904506	0.0766106	-1.18065	0.237741	0.355129
ATP2A3	45.4157	-0.645146	0.318891	-2.0231	0.0430633	0.0879795
CA12	56.5953	2.98149	0.341406	8.73298	2.48056e-18	3.92604e-17
MGLL	78.0054	1.8359	0.273646	6.70904	1.95905e-11	1.79472e-10
NTN4	366.286	0.777947	0.125653	6.19122	5.97011e-10	4.75593e-09
BCS1L	388.05	0.192476	0.121546	1.58356	0.113294	0.197408
NUAK1	2573.02	0.564529	0.0753965	7.48747	7.02141e-14	8.04646e-13
DPP8	1157.66	-0.105326	0.0838507	-1.25611	0.209076	0.321626
SLC24A1	387.683	0.520372	0.117367	4.43371	9.26264e-06	4.34507e-05
ZNF532	2765.17	-0.569466	0.0648833	-8.77676	1.68244e-18	2.70965e-17
SCARF1	30.5088	-0.592783	0.401604	-1.47604	0.139933	0.233457
LMAN1	8585.26	-0.037915	0.0576766	-0.657373	0.510941	0.632946
HACD3	2499.82	-0.156256	0.0619398	-2.52271	0.0116453	0.0286606
IPCEF1	4.02337	2.54118	1.18878	2.13764	0.0325463	0.069435
ZZEF1	1171.55	0.390628	0.0948226	4.11957	3.79588e-05	0.000162098
NOX3	0	NA	NA	NA	NA	NA
ENO1	16954	0.418244	0.0568547	7.35637	1.88981e-13	2.09033e-12
SLC12A1	1.10875	-1.04777	2.05587	-0.509647	0.610299	NA
MYDGF	3278.19	-0.38164	0.0681114	-5.60317	2.10473e-08	1.42704e-07
ANO8	278.927	-0.910673	0.135649	-6.71346	1.90067e-11	1.74534e-10
TUBE1	513.626	0.8891	0.113555	7.82969	4.89078e-15	6.21281e-14
ARHGEF10L	388.645	0.179361	0.116212	1.54339	0.122736	0.210285
TXK	6.44514	0.495295	0.831233	0.595856	0.551271	0.669278
WSCD2	7.83318	0.434765	0.748151	0.581119	0.56116	0.677324
KCNQ2	48.6659	-2.84693	0.374834	-7.59516	3.07424e-14	3.62439e-13
TACR2	4.21231	1.82144	1.06123	1.71634	0.0860996	0.157623
ACTR6	309.113	-0.218609	0.129793	-1.68429	0.0921255	0.1666
TIPIN	123.151	0.491671	0.191862	2.56262	0.0103886	0.0258701
SRI	492.531	-0.162761	0.124382	-1.30855	0.190687	0.298751
EIF4G3	2772.72	-0.12179	0.0653697	-1.8631	0.0624487	0.120607
NUP37	351.658	0.0440774	0.128676	0.342546	0.73194	0.815396
SEMA3A	1285.2	-0.286821	0.0834297	-3.43788	0.000586291	0.00197981
GTSE1	339.691	0.0767052	0.151751	0.505468	0.61323	0.721598
SEMA3C	6686.8	1.25502	0.0795193	15.7826	4.0986e-56	2.84962e-54
TTC38	353.026	-0.0673001	0.133373	-0.5046	0.61384	0.722105
ACAT1	303.43	-0.13324	0.130157	-1.02369	0.305982	0.431841
GRAMD4	370.07	-0.593543	0.125086	-4.74509	2.0841e-06	1.08845e-05
CELSR1	199.54	-0.342423	0.201964	-1.69546	0.089988	0.163361
WNT8B	1.09408	-2.23996	2.07237	-1.08087	0.279755	NA
ZNF638	2500.14	-0.426796	0.0687776	-6.20545	5.45413e-10	4.36274e-09
SLC25A40	246.745	-0.0110584	0.138114	-0.0800671	0.936184	0.961772
TIMM21	448.637	0.158277	0.108592	1.45754	0.144968	0.239955
ADD2	195.588	0.1333	0.156532	0.851582	0.394446	0.522195
FGF4	0	NA	NA	NA	NA	NA
RASAL2	847.368	0.147332	0.0969354	1.5199	0.128536	0.217779
VPS9D1	226.087	0.2508	0.14593	1.71863	0.085681	0.157043
ZNF37A	463.904	0.605978	0.111531	5.43325	5.53361e-08	3.57003e-07
MARK3	1710.8	-0.188494	0.0687804	-2.74051	0.00613434	0.0162311
SLC25A3	8181.06	-0.271978	0.0584897	-4.65002	3.31899e-06	1.67933e-05
FNDC3B	6146.53	-0.0384981	0.060583	-0.635461	0.525127	0.645502
FOSL2	2637.98	0.800018	0.066297	12.0672	1.57434e-33	5.21677e-32
CACNG5	0.455278	-0.503794	3.25103	-0.154965	0.876849	NA
CACNG4	80.5901	-2.66158	0.292827	-9.08925	9.97278e-20	1.72191e-18
FRYL	772.488	-0.565587	0.101646	-5.56428	2.63235e-08	1.76328e-07
TMEM131	1348.15	-0.031584	0.0853044	-0.37025	0.711196	0.799997
FSCN1	10141.7	-0.00359431	0.0556654	-0.0645698	0.948517	0.968811
ACTB	69055.4	0.749304	0.0619062	12.1039	1.00764e-33	3.36038e-32
MOCOS	134.586	1.92776	0.231645	8.32203	8.64673e-17	1.25503e-15
PLD1	1257.65	-0.146766	0.0772165	-1.90071	0.0573399	0.112018
ATP12A	607.607	-0.753744	0.283824	-2.65567	0.00791505	0.0203486
WDR62	189.386	-0.044981	0.156668	-0.287111	0.774028	0.848564
DLG1	1857.74	0.285291	0.068168	4.18512	2.85013e-05	0.000124371
RAB7A	3860.59	-0.201279	0.0618125	-3.25629	0.0011288	0.0035587
BCAP29	14.8589	0.859871	0.556082	1.5463	0.122031	0.209377
SEC31B	239.184	-0.38128	0.142669	-2.67248	0.00752924	0.0194623
SART3	767.91	-0.160911	0.0884259	-1.81973	0.0688003	0.130606
ARHGAP15	3.89882	-3.25595	1.42864	-2.27904	0.0226644	0.0510154
TUBA3D	17.3708	0.758113	0.518469	1.46222	0.143682	0.238256
PAX2	1.25864	-1.32378	1.95286	-0.677869	0.497855	NA
EXOSC7	416.913	-0.243639	0.116472	-2.09183	0.036454	0.0763802
KIFAP3	464.309	-0.392322	0.109565	-3.58072	0.000342645	0.00121863
MKRN2	464.035	0.482146	0.10804	4.46268	8.09414e-06	3.83622e-05
MCM6	823.831	0.758091	0.0856761	8.84834	8.88327e-19	1.45476e-17
REXO2	1212.99	0.596502	0.0898541	6.63856	3.16763e-11	2.86152e-10
RBM7	744.04	0.476604	0.0917606	5.19399	2.05835e-07	1.23058e-06
RBMS2	1118.92	0.0131007	0.0798645	0.164037	0.869702	0.918116
BAZ2A	2542.37	-0.287729	0.0740273	-3.88679	0.000101579	0.000400401
PTPN23	848.456	-0.0486032	0.0934661	-0.520009	0.603057	0.713733
MLH1	835.571	0.242632	0.0898772	2.69959	0.0069424	0.0181198
UNG	461.165	0.181917	0.108219	1.68101	0.0927605	0.167438
FMO4	166.377	-0.185888	0.165841	-1.12088	0.262338	0.383677
KLHL20	615.792	0.124265	0.0990418	1.25467	0.209599	0.322272
RGS11	88.9274	1.13456	0.242495	4.67868	2.88727e-06	1.47238e-05
SLC46A1	103.752	0.389619	0.217959	1.78758	0.0738438	0.138509
PLXNA2	1245.36	1.3593	0.0974529	13.9483	3.22131e-44	1.52953e-42
SPAG5	418.215	-0.155064	0.11152	-1.39046	0.164389	0.265663
ANKRD13A	644.041	1.05742	0.103254	10.241	1.29833e-24	2.86405e-23
TPD52	321.036	0.45137	0.126744	3.56127	0.000369059	0.00130541
ACACB	191.556	-0.0970616	0.169859	-0.571424	0.567712	0.682798
TRAF4	1153.62	-0.774228	0.0857962	-9.02404	1.81273e-19	3.08203e-18
PAG1	549.062	0.0883877	0.12433	0.710915	0.477137	0.602036
GPATCH1	193.371	-0.0101154	0.162746	-0.0621549	0.95044	0.969869
ICAM3	0.344748	-1.767	3.8867	-0.454628	0.649377	NA
NT5C2	763.251	0.614702	0.101855	6.03505	1.58918e-09	1.21621e-08
MCAM	1838.77	0.239827	0.0676617	3.5445	0.000393354	0.00138443
GPC4	2322.34	-0.419968	0.0787887	-5.33031	9.80433e-08	6.16193e-07
MBNL3	1682.73	1.3133	0.312263	4.20576	2.60206e-05	0.000114186
CAMSAP3	64.9567	-0.623548	0.269575	-2.31308	0.0207182	0.0471664
RAP1GAP	80.0715	0.197789	0.251846	0.785357	0.432244	0.559815
XAB2	713.446	-0.252409	0.0932006	-2.70824	0.0067642	0.0177022
ARHGEF1	1265.7	-0.162143	0.0744771	-2.17708	0.0294745	0.0639593
STXBP2	110.767	-0.32532	0.216967	-1.4994	0.13377	0.224888
MAP2K7	403.372	-0.329596	0.115154	-2.86221	0.00420692	0.0116312
NMRK2	5.1062	-1.0985	0.976701	-1.1247	0.260717	0.381832
DGKD	997.206	-0.0338243	0.0998349	-0.338802	0.734759	0.817191
CTTNBP2	284.01	-2.00575	0.168032	-11.9367	7.61795e-33	2.47687e-31
ACTL6B	1.05716	1.11709	2.22426	0.50223	0.615505	NA
RARB	487.864	1.12258	0.136471	8.22571	1.94031e-16	2.72975e-15
TOP2B	3988.95	-0.389626	0.0745066	-5.22942	1.70045e-07	1.02734e-06
TM9SF3	5752.63	-0.119295	0.0563066	-2.11866	0.0341193	0.0722269
NFKB2	596.884	0.0620839	0.0989919	0.627162	0.530553	0.650054
UBE2T	249.768	-0.272128	0.145959	-1.86442	0.0622629	0.120323
PPP1R12B	421.259	0.0193207	0.119115	0.162202	0.871147	0.919127
DNAJC10	4036.43	-0.184785	0.0666513	-2.77241	0.00556421	0.0148946
GTF3C1	2499.87	-0.0168362	0.0705335	-0.238698	0.81134	0.877791
IL4R	225.061	0.323346	0.158275	2.04294	0.041058	0.0844663
USP33	1180.74	-0.377896	0.0771533	-4.89798	9.68245e-07	5.30033e-06
PAK3	65.0775	-0.198978	0.29009	-0.685919	0.492764	0.616311
CAPN6	87.1773	0.416169	0.256843	1.62032	0.105163	0.185776
DCX	20.9286	0.437686	0.466687	0.937858	0.348317	0.476603
SNRPA	506.79	-0.477621	0.127525	-3.74531	0.000180172	0.000677124
SPAG6	1.38228	1.82527	1.83149	0.996607	0.318955	NA
EXOSC5	141.886	0.545496	0.196046	2.78249	0.00539433	0.0145147
DYNC1I2	2470.14	-0.270712	0.0667948	-4.05289	5.05886e-05	0.000211168
APBB1IP	7.42065	1.47541	0.78509	1.87929	0.0602055	0.116825
LRCH4	251.245	-0.153704	0.141384	-1.08714	0.276976	0.399705
FAM76B	516.492	-0.288584	0.107795	-2.67716	0.00742482	0.0192371
SIRT6	242.947	-0.0919193	0.145653	-0.631084	0.527985	0.647723
TYR	0.785968	-2.97323	2.61436	-1.13727	0.255426	NA
POLD3	337.093	0.579484	0.131871	4.39433	1.11117e-05	5.15193e-05
ACTN2	185.667	0.981562	0.163295	6.01095	1.84434e-09	1.40596e-08
CAPZB	3554.12	0.334179	0.0612415	5.45674	4.84954e-08	3.15615e-07
GPR137B	259.373	0.17743	0.143468	1.23673	0.216188	0.329801
NAALAD2	1753.22	-0.972937	0.0857837	-11.3417	8.15088e-30	2.32069e-28
JADE1	1112.13	-0.419462	0.087855	-4.77448	1.80173e-06	9.4958e-06
SLC25A43	266.193	0.364618	0.137826	2.6455	0.00815707	0.0208841
UBE2A	1102.16	0.0124099	0.079567	0.155968	0.876059	0.922747
FGFR1	2103.7	-0.0884228	0.0684294	-1.29218	0.196296	0.305773
FKBP6	1.68364	0.204172	1.86566	0.109437	0.912856	0.947725
SMC1B	6.65349	2.15522	0.873355	2.46774	0.0135968	0.0328358
FBLN1	2739.54	-0.228871	0.0640848	-3.57138	0.000355108	0.00125921
ITGA8	1615.34	-2.07004	0.107698	-19.2208	2.47765e-82	3.41477e-80
CST7	1.14855	-1.10902	2.06634	-0.536709	0.591469	NA
MAP2	209.507	-1.86318	0.175627	-10.6087	2.71383e-26	6.51236e-25
PIAS2	538.806	-0.214243	0.110292	-1.94251	0.0520748	0.103448
AMPH	32.6459	-0.166434	0.373134	-0.446043	0.655566	0.756057
ARAF	638.087	0.382588	0.0967917	3.95269	7.72778e-05	0.000312198
MCCC1	240.001	-0.00654136	0.152401	-0.0429221	0.965764	0.979219
LAMP3	34.8989	1.94713	0.386961	5.03186	4.85755e-07	2.77315e-06
FAP	277.184	3.07206	0.163117	18.8335	4.01635e-79	5.00405e-77
NEBL	1650.18	1.48855	0.103073	14.4418	2.82401e-47	1.49596e-45
ACER3	454.377	0.420817	0.116901	3.59977	0.000318497	0.00114161
UBE2K	2130.78	-0.218251	0.0676817	-3.22466	0.0012612	0.00393785
PIK3C3	973.176	0.090554	0.084375	1.07323	0.283167	0.40623
N4BP2	1472.73	-0.51738	0.0879711	-5.88125	4.07184e-09	2.98142e-08
TIGAR	494.614	1.01094	0.104483	9.67565	3.82668e-22	7.48703e-21
TULP3	844.539	0.101994	0.0856215	1.19122	0.233567	0.349969
SYNJ2	673.393	0.758784	0.0965535	7.85869	3.88176e-15	4.95936e-14
ADCY2	158.535	-1.0749	0.192934	-5.57136	2.52752e-08	1.69744e-07
PPP2R5C	1589.22	-0.113244	0.0714048	-1.58594	0.112752	0.196707
RBFOX1	10.063	0.535347	0.646611	0.827926	0.407712	0.535253
GNB1	6294.5	-0.026784	0.0589975	-0.453985	0.649839	0.752125
HOXA9	348.053	-1.30433	0.129505	-10.0716	7.37345e-24	1.56237e-22
EDN1	65.5685	0.0549387	0.287022	0.191409	0.848205	0.903306
MLLT10	1065.15	-0.238412	0.0864893	-2.75655	0.0058415	0.0155392
ZCWPW1	77.878	0.0564786	0.277696	0.203383	0.838836	0.896639
ADCYAP1R1	3.03324	0.515933	1.28228	0.402357	0.687421	0.78132
FGF20	7.76785	-0.90394	0.762853	-1.18495	0.236039	0.35306
P2RY10	0	NA	NA	NA	NA	NA
ITM2A	293.145	0.132233	0.140089	0.943921	0.34521	0.47306
NRDC	2175.39	-0.135358	0.0661873	-2.04508	0.040847	0.0841024
VDAC3	1335.51	-0.140675	0.0763166	-1.84331	0.0652831	0.125227
PCM1	2073.29	-0.0419447	0.0711617	-0.589427	0.555575	0.672772
TNRC6C	257.988	0.656299	0.158863	4.13123	3.60825e-05	0.000154597
CBFA2T2	666.011	-0.589844	0.0935814	-6.30301	2.91928e-10	2.40682e-09
BRINP1	67.1797	-2.0784	0.295045	-7.04434	1.86339e-12	1.89182e-11
ITCH	1785.11	-0.262517	0.0690953	-3.79935	0.000145076	0.00055514
PKD2L2	12.7819	-0.194348	0.598754	-0.324587	0.745494	0.824948
TP53INP2	832.799	0.240064	0.0955993	2.51115	0.0120338	0.0295188
SDF4	3893.08	0.151978	0.0588258	2.58354	0.00977931	0.024537
MYH7B	56.2468	1.20265	0.312292	3.85105	0.000117613	0.000457241
BPIFB2	0	NA	NA	NA	NA	NA
TP73	4.18882	0.375095	1.01189	0.370688	0.71087	0.799819
TOLLIP	693.332	0.0954533	0.107819	0.885314	0.375987	0.503883
UBE2D4	65.109	0.638634	0.287443	2.22177	0.0262985	0.0580543
CLUL1	41.6935	1.88915	0.355892	5.30821	1.10706e-07	6.90209e-07
RUNX1T1	438.119	1.32327	0.120979	10.938	7.58486e-28	1.96878e-26
CDH17	3.86782	0.902841	1.13647	0.794427	0.426947	0.554476
THOC1	513.477	-0.180618	0.106923	-1.68924	0.0911735	0.16509
FKBP7	1093.84	-0.625193	0.0799394	-7.82083	5.24749e-15	6.6281e-14
OSBPL6	165.854	0.328456	0.166133	1.97707	0.0480338	0.0968763
SLC1A3	2998.68	1.71782	0.0829313	20.7138	2.60173e-95	4.50214e-93
XRCC5	5166.45	-0.226818	0.0591596	-3.834	0.000126075	0.000487703
LXN	761.752	2.07296	0.104743	19.791	3.55935e-87	5.48845e-85
SP140	14.8363	-4.30171	0.88799	-4.84432	1.27044e-06	6.86055e-06
MKNK1	366.536	-0.0436901	0.12079	-0.361703	0.717574	0.804861
TNS1	3642.42	1.35965	0.0757041	17.96	4.00667e-72	4.18791e-70
REXO1	421.444	0.0799196	0.113778	0.702418	0.482419	0.606786
SAR1A	3063.27	0.444724	0.0598349	7.43253	1.06541e-13	1.20507e-12
CDC14A	160.741	-0.398826	0.180722	-2.20684	0.0273251	0.0599043
RAPGEF3	132.526	0.739075	0.196753	3.75635	0.000172409	0.000650144
CEACAM1	23.5268	-0.0123839	0.432308	-0.028646	0.977147	0.986074
SENP1	330.777	0.11581	0.126929	0.912397	0.36156	0.490157
DUSP13	1.77368	-1.20796	1.61428	-0.748295	0.454282	0.580155
CIC	1066.93	-0.129804	0.0870521	-1.49111	0.135933	0.227784
LIPE	59.1908	0.368162	0.301243	1.22214	0.221654	0.335966
FDFT1	1944.68	-0.81941	0.0829715	-9.87579	5.30116e-23	1.07641e-21
PAFAH1B3	122.474	-1.08961	0.203557	-5.35284	8.65829e-08	5.47035e-07
OPHN1	213.008	0.113791	0.171518	0.663431	0.507054	0.629684
AFM	0	NA	NA	NA	NA	NA
KIF22	557.486	0.307073	0.105989	2.89723	0.00376478	0.0105189
SCGN	0	NA	NA	NA	NA	NA
CARMIL1	857.182	0.797756	0.0989908	8.05889	7.69934e-16	1.03998e-14
PGM1	706.938	0.830326	0.103207	8.04528	8.60487e-16	1.15944e-14
DDX1	2678.05	-0.0653329	0.0610035	-1.07097	0.284183	0.407313
DNM2	2197.41	-0.0996803	0.0650487	-1.53239	0.125425	0.213787
EPB41L2	2725.96	-0.331216	0.0737098	-4.49351	7.00575e-06	3.35922e-05
RIMS1	79.7936	-0.960693	0.248608	-3.86428	0.000111417	0.000435435
MOXD1	3634.51	1.99178	0.0738896	26.9561	4.83993e-160	2.79174e-157
STX7	1142.51	0.167627	0.0836422	2.0041	0.0450593	0.0914218
RABL2B	386.374	0.148925	0.120342	1.23752	0.215895	0.329481
KEAP1	879.983	-0.0124856	0.0890399	-0.140225	0.888482	0.930671
DDX43	0	NA	NA	NA	NA	NA
PTPRH	121.529	1.54696	0.201043	7.69466	1.4187e-14	1.7088e-13
DCT	3.32876	1.16921	1.1746	0.995415	0.319534	0.445876
SLC35C2	927.511	-0.10191	0.0836832	-1.21781	0.223296	0.337567
CRYBG3	257.8	0.733126	0.150269	4.87874	1.06764e-06	5.8138e-06
EPHA6	36.3114	0.374956	0.351786	1.06586	0.286486	0.409879
SCTR	6.22362	0.156944	0.827712	0.189611	0.849614	0.904045
RFX3	506.19	-1.00422	0.126302	-7.95094	1.85096e-15	2.43676e-14
RIF1	1211.22	0.158972	0.0891442	1.78331	0.0745353	0.139588
RAB21	915.997	0.217835	0.0890499	2.44621	0.0144366	0.0346166
SLC4A4	407.123	0.0085322	0.123107	0.0693072	0.944745	0.966635
SMARCA2	1200.71	0.838913	0.0836634	10.0272	1.15704e-23	2.43181e-22
RDH8	0.179534	1.20711	4.08047	0.295827	0.767362	NA
SESN1	613.56	-0.301712	0.102901	-2.93205	0.0033673	0.00953843
MID2	177.096	0.625553	0.165554	3.77854	0.000157749	0.000599652
DNAAF6	0.538602	2.68054	3.25307	0.824003	0.409938	NA
COL5A3	80.0868	2.8927	0.284482	10.1683	2.74651e-24	5.94911e-23
SRCAP	53.7387	0.651165	0.300646	2.16588	0.0303201	0.0654994
PUM3	1090.61	0.56745	0.0830678	6.83116	8.42303e-12	8.03801e-11
CPB2	3.88862	0.0457315	1.1181	0.0409011	0.967375	0.980597
CHRNA3	58.4771	2.99797	0.331766	9.0364	1.61911e-19	2.76189e-18
KCNN2	324.031	1.47864	0.141729	10.4328	1.75544e-25	4.08048e-24
CNOT4	463.493	0.265374	0.114389	2.31992	0.0203452	0.0464391
PSEN1	1126.61	-0.083751	0.0827185	-1.01248	0.311308	0.437533
CPOX	638.304	-0.00557146	0.0988334	-0.0563722	0.955045	0.972594
CLDND1	1374.92	-0.609228	0.0758415	-8.0329	9.51915e-16	1.27913e-14
MOK	87.9055	-0.0533808	0.228204	-0.233917	0.81505	0.88046
HSP90AA1	11555.9	0.0343132	0.055214	0.621459	0.534298	0.653562
RBL1	190.67	0.897665	0.165468	5.42502	5.79491e-08	3.73396e-07
DLGAP4	1093.74	-0.106473	0.0798683	-1.33311	0.182496	0.28846
IGSF9B	73.893	-1.20286	0.263333	-4.56784	4.92771e-06	2.41485e-05
CFHR2	0	NA	NA	NA	NA	NA
NDC80	294.611	0.28644	0.149574	1.91504	0.0554871	0.109097
AP4E1	471.195	0.0549532	0.109619	0.501311	0.616152	0.72384
RSBN1	320.605	-0.214446	0.126926	-1.68954	0.0911169	0.165025
MAGI3	284.444	-0.173399	0.13405	-1.29354	0.195825	0.305283
CXCL2	3.80256	1.04871	1.10207	0.951583	0.341308	0.469487
AFP	12.2077	0.562404	0.700902	0.802399	0.422322	0.549569
COL4A4	18.7203	0.736943	0.544477	1.35349	0.1759	0.280166
TCF7	75.5162	-0.667625	0.259879	-2.56898	0.0101997	0.0254609
OSTM1	1016.53	-0.292337	0.0844415	-3.46201	0.000536163	0.00182678
CDH7	190.752	1.25962	0.161235	7.81236	5.61284e-15	7.06989e-14
IMPG2	41.5369	-0.55682	0.323681	-1.72027	0.0853826	0.156552
PCNP	3247.59	-0.384437	0.0647885	-5.93373	2.9613e-09	2.20034e-08
EXD2	459.75	-0.00756855	0.114946	-0.0658442	0.947502	0.968267
ARG2	133.32	0.874073	0.20079	4.35316	1.34186e-05	6.13749e-05
MEF2C	129.973	-0.00344141	0.210896	-0.0163181	0.986981	0.991757
PTPRC	2.04782	-1.44971	1.51429	-0.957357	0.338387	0.466169
CACNA1S	1.01827	1.41405	2.42865	0.582236	0.560407	NA
PKP1	29.7662	-0.202816	0.387918	-0.522832	0.601091	0.711785
UBA5	968.132	0.100448	0.08226	1.2211	0.222049	0.336367
STK17B	403.41	-0.303732	0.138976	-2.1855	0.0288523	0.0627494
CDC14B	501.842	-0.797432	0.110178	-7.2377	4.56356e-13	4.88137e-12
ZNF510	262.16	0.104329	0.156308	0.667455	0.504482	0.627389
LRP2	355.646	1.96849	0.39482	4.98579	6.17081e-07	3.47448e-06
ZNF506	315.674	-0.468182	0.130011	-3.6011	0.000316877	0.00113711
JMJD4	42.1539	0.372012	0.350292	1.062	0.288234	0.411718
DUSP12	345.555	0.0249036	0.139249	0.178842	0.858062	0.910441
AACS	682.81	0.469341	0.0915909	5.12432	2.98612e-07	1.75428e-06
DELE1	967.872	-0.126253	0.0871371	-1.44891	0.147364	0.242965
SLC13A1	0.179534	1.20711	4.08047	0.295827	0.767362	NA
CADPS2	258.342	0.695708	0.140354	4.95679	7.16669e-07	3.99907e-06
PCDHB4	36.3531	-0.606511	0.347062	-1.74756	0.0805406	0.149095
PCDHA6	172.103	0.219334	0.160239	1.36879	0.171065	0.274116
PCDHGA2	11.4634	-1.5755	0.647806	-2.43205	0.0150138	0.0357858
HSPB11	451.385	0.505561	0.107233	4.71461	2.42169e-06	1.24886e-05
PHLPP1	469.545	-0.267885	0.108566	-2.46749	0.0136063	0.0328533
ATP8B1	44.8524	0.985914	0.317796	3.10235	0.00191994	0.00573258
IL12RB2	19.5306	1.09181	0.515363	2.11854	0.0341297	0.0722294
SMARCD3	790.319	0.547252	0.10066	5.43664	5.42954e-08	3.51307e-07
WDR70	548.531	-0.0970818	0.102038	-0.951428	0.341387	0.469514
FYB1	15.8451	-2.53069	0.62855	-4.02624	5.66758e-05	0.000234378
MPP4	14.0985	-0.849728	0.559733	-1.51809	0.128991	0.218406
STRADB	518.936	-0.166949	0.115339	-1.44746	0.147767	0.243501
BZW1	4205.62	0.0606805	0.0679585	0.892905	0.371908	0.500354
PGR	30.1653	0.250995	0.40915	0.613454	0.539576	0.658629
C1QTNF3	20.7118	-0.617928	0.458254	-1.34844	0.177517	0.282164
ME2	927.613	0.24596	0.0817931	3.0071	0.00263749	0.0076492
C5orf22	707.047	0.155527	0.0939484	1.65545	0.0978337	0.175013
CCNT2	1147.54	-0.109901	0.077521	-1.41769	0.15628	0.254779
FAM135A	353.448	0.166012	0.121072	1.37118	0.170319	0.273145
COL19A1	14.8245	-1.26969	0.565681	-2.24454	0.0247978	0.0552585
EPB41L3	553.703	-0.803884	0.119005	-6.75506	1.42776e-11	1.3299e-10
COBLL1	1724.27	1.33495	0.0862185	15.4834	4.49257e-54	2.9275e-52
DLG3	479.089	-0.948913	0.112456	-8.43809	3.22563e-17	4.79809e-16
KCNK2	1.05125	2.48055	2.14475	1.15657	0.247447	NA
SERTAD4	35.8526	0.815921	0.356872	2.28631	0.0222359	0.0502178
TRAF5	888.88	0.86187	0.0828228	10.4062	2.32336e-25	5.35266e-24
MRPL22	370.718	-0.548386	0.14669	-3.73839	0.0001852	0.000695181
GEMIN5	435.269	0.520884	0.126321	4.12351	3.73145e-05	0.000159521
OPRK1	2.54327	2.32733	1.54074	1.51053	0.130909	0.221053
NFE2L1	6945.1	0.537753	0.0626234	8.58708	8.9206e-18	1.37964e-16
SEMA5B	47.4583	-2.54549	0.819448	-3.10635	0.00189414	0.00566642
GSK3B	2103.77	-0.303378	0.0766222	-3.9594	7.5138e-05	0.000304501
ITGB5	2405.2	0.0904838	0.0687047	1.31699	0.18784	0.295229
ERC1	1190.93	0.399153	0.0941518	4.23946	2.24054e-05	9.92061e-05
XPO1	4282.53	-0.139531	0.0611423	-2.28207	0.0224855	0.0506786
RNF13	470.782	0.087503	0.111099	0.787614	0.430923	0.558428
TRPM3	4.33892	-1.93015	1.087	-1.77567	0.0757874	0.141609
PALB2	177.368	-0.00671717	0.168169	-0.039943	0.968139	0.981307
DOP1A	422.24	0.662578	0.123365	5.37089	7.83485e-08	4.96824e-07
LYRM2	563.844	0.198478	0.105029	1.88974	0.0587926	0.114493
BCKDHB	424.248	-0.485707	0.111604	-4.35205	1.34869e-05	6.16693e-05
KAT6A	1558.27	0.73009	0.0919111	7.94344	1.96656e-15	2.58022e-14
TUT7	605.079	-0.0163585	0.105275	-0.155389	0.876515	0.922853
ULK2	562.037	0.124433	0.105981	1.17411	0.240352	0.358102
GRHL2	21.7327	-4.24932	0.715882	-5.93578	2.92446e-09	2.17713e-08
TNPO1	6262.49	0.403445	0.063278	6.37576	1.82057e-10	1.53097e-09
PLOD1	6558.38	0.371699	0.0539207	6.89345	5.44568e-12	5.29076e-11
P2RX5	2.24057	1.96044	1.57509	1.24465	0.21326	0.326548
ITGAE	208.427	0.145653	0.161233	0.903368	0.366331	0.494817
DIS3	1345.93	-0.189002	0.0753691	-2.50769	0.0121522	0.029767
PIBF1	342.429	-0.288339	0.121934	-2.36471	0.0180442	0.0418684
TDRD3	235.134	-0.0525095	0.141653	-0.370689	0.710869	0.799819
NUFIP1	149.678	-0.215277	0.185534	-1.16031	0.245922	0.364796
PDS5B	744.572	-0.128089	0.0906406	-1.41316	0.15761	0.256466
OXCT1	819.054	0.6386	0.0954206	6.69247	2.19429e-11	2.00198e-10
RRAGB	303.59	-0.227743	0.133657	-1.70393	0.0883942	0.161031
EPYC	2.5544	-0.0324208	1.46203	-0.0221751	0.982308	0.98904
CYLD	502.552	0.0965721	0.10667	0.905332	0.365289	0.493975
SLC27A5	67.2786	-0.174254	0.282009	-0.617903	0.536639	0.655963
ZNF324	156.796	0.304467	0.171718	1.77307	0.0762176	0.142293
ZNF671	156.194	-0.0550276	0.173439	-0.317274	0.751035	0.829666
ZNF416	74.1553	-0.021517	0.259259	-0.0829941	0.933856	0.960372
ZNF586	191.257	0.0351042	0.156111	0.224867	0.822083	0.884743
ZNF446	63.1882	0.146423	0.276999	0.528606	0.597079	0.70838
ZNF264	391.498	0.117131	0.137571	0.851425	0.394533	0.522266
RPS5	8393.09	-0.0709866	0.0686952	-1.03336	0.301437	0.426664
FAT1	2657.64	0.182924	0.0873769	2.09351	0.0363037	0.0761064
YTHDC1	1818.49	-0.128942	0.071256	-1.80955	0.0703651	0.132945
CHMP2B	869.052	-0.191791	0.0890167	-2.15455	0.0311971	0.0670156
SMAP2	379.89	0.214188	0.124834	1.71579	0.0862013	0.157737
PPIE	814.555	0.393445	0.0886402	4.43867	9.05162e-06	4.25634e-05
ZMPSTE24	1390.57	0.232063	0.0901811	2.5733	0.0100733	0.0251898
STARD7	1780.18	-0.058558	0.0697762	-0.839226	0.401342	0.528942
NOA1	345.96	-0.417927	0.136738	-3.05641	0.00224007	0.00659612
REST	1545.82	-0.519745	0.0752989	-6.90243	5.1122e-12	4.97298e-11
HAL	7.90105	-0.234878	0.789066	-0.297666	0.765958	0.842743
SSH1	1312.24	0.0671725	0.0783835	0.856972	0.39146	0.518992
GSTP1	7674.36	-0.04867	0.0725332	-0.671002	0.502219	0.625225
APLP2	16750.8	-0.0763208	0.0499636	-1.52753	0.12663	0.215322
FAM234B	87.3185	-0.536121	0.248298	-2.15918	0.0308359	0.0663771
SLCO1A2	34.689	-1.39145	0.372437	-3.73606	0.000186923	0.000701143
WBP11	1625.51	-0.309283	0.0696496	-4.44055	8.97278e-06	4.22054e-05
EIF3I	2643.2	0.0993385	0.0639877	1.55246	0.120552	0.207295
NKAIN1	35.1068	-0.581278	0.370354	-1.56952	0.116527	0.201847
COL16A1	3349.85	1.84823	0.0753608	24.5251	7.96827e-133	2.75773e-130
TXLNA	1861.82	0.867004	0.069892	12.4049	2.45756e-35	8.60091e-34
APOB	25.044	2.38817	1.22391	1.95126	0.0510257	0.101699
NCOA1	676.606	0.0223717	0.0965762	0.231648	0.816811	0.881506
AGBL5	672.999	-0.170836	0.0999808	-1.70869	0.0875083	0.159716
EFR3B	231.038	0.168993	0.149116	1.13329	0.257091	0.37773
KIF3C	682.765	-0.440794	0.0979538	-4.50002	6.7947e-06	3.26506e-05
RAB10	2363.93	-0.0597206	0.063936	-0.934069	0.350269	0.47881
GCKR	0.7089	3.08019	2.68309	1.148	0.250968	NA
HADHA	3410.09	-0.133533	0.0591056	-2.25923	0.0238694	0.0534573
MAPRE3	457.131	-0.62426	0.117557	-5.31029	1.09451e-07	6.82655e-07
CAD	1795.62	0.636189	0.0728455	8.73341	2.47118e-18	3.91517e-17
CD59	1242.06	-0.0984929	0.0764549	-1.28825	0.19766	0.307466
CD82	330.127	0.790839	0.138967	5.69084	1.26419e-08	8.7856e-08
BCORL1	366.271	-0.708315	0.129946	-5.45086	5.01271e-08	3.25555e-07
ATRX	2360.98	-0.620229	0.0684511	-9.0609	1.29373e-19	2.22e-18
AK6	177.365	-0.399283	0.195229	-2.0452	0.0408354	0.0840973
FCN1	0.658089	-1.28482	2.6415	-0.486401	0.626683	NA
MYNN	272.29	0.146776	0.137384	1.06836	0.285357	0.408695
MECOM	54.3637	-0.702524	0.310444	-2.26296	0.0236379	0.052977
SCAMP1	874.347	-0.302308	0.091256	-3.31275	0.000923831	0.0029739
PREP	610.491	-0.126317	0.101722	-1.24178	0.214316	0.327713
HACE1	458.527	0.0212216	0.115607	0.183568	0.854353	0.90787
SEH1L	534.961	0.461017	0.0996854	4.62472	3.75097e-06	1.87537e-05
WDR47	364.096	-0.265529	0.126158	-2.10473	0.0353148	0.0743235
WDFY1	1117.37	-0.679234	0.0841758	-8.06923	7.07412e-16	9.58855e-15
OVGP1	74.6878	-0.627647	0.26339	-2.38295	0.0171743	0.0400889
SLC25A24	1287.71	0.0565062	0.0758709	0.744768	0.456412	0.582141
MAP3K4	455.75	0.143723	0.110819	1.29692	0.194659	0.303739
PILRA	12.8723	-0.74175	0.633091	-1.17163	0.241344	0.359443
IGSF9	44.3866	-2.60061	0.381769	-6.812	9.62506e-12	9.15144e-11
ABCB1	10.3047	-1.92522	0.720355	-2.6726	0.00752659	0.0194587
ZNF213	203.275	0.0659746	0.165773	0.397983	0.690643	0.783456
AKR1B1	2014.75	-0.548704	0.0745649	-7.35874	1.85658e-13	2.05503e-12
CPNE3	1204.92	0.220422	0.0763519	2.88692	0.00389038	0.0108349
RRN3	978.193	0.0600484	0.0987079	0.608344	0.542959	0.661663
CTTN	6362.36	0.112163	0.0546861	2.05103	0.0402636	0.0831211
WNT11	38.3913	0.0184073	0.355845	0.0517284	0.958745	0.974433
MTIF2	686.157	-0.199334	0.0967825	-2.05961	0.039436	0.0816399
DDHD2	1055.6	-0.325438	0.0880247	-3.69712	0.000218059	0.000805896
TTC39A	26.4135	-0.570056	0.414619	-1.37489	0.169165	0.271702
EPS15	958.022	-0.440507	0.0804364	-5.47646	4.3391e-08	2.84176e-07
ORC1	185.005	-0.210855	0.158681	-1.3288	0.183916	0.290409
MGST2	285.565	-0.681548	0.136724	-4.98484	6.20125e-07	3.4891e-06
CHERP	457.222	0.150384	0.115432	1.3028	0.192644	0.301138
ATG16L1	560.501	0.0061251	0.0980661	0.0624589	0.950197	0.969702
USP40	788.712	0.429336	0.0883655	4.85863	1.18198e-06	6.40952e-06
POMGNT1	1117.63	-0.0589157	0.08212	-0.717435	0.473106	0.598161
RAD54L	103.922	0.525677	0.216445	2.42869	0.0151535	0.0360362
MAST2	1416.01	0.0289659	0.072003	0.402287	0.687473	0.78132
DNAJA1	2869.32	-0.241561	0.0775664	-3.11425	0.00184416	0.00553283
B4GALT1	2631.5	0.354344	0.064029	5.53412	3.12797e-08	2.08095e-07
CHMP5	1439.75	0.0415287	0.0764975	0.542876	0.587215	0.700215
NFX1	1188.46	0.646915	0.0769528	8.40665	4.21888e-17	6.23386e-16
AQP6	2.79205	0.0438019	1.41089	0.0310455	0.975233	0.984909
DIMT1	231.394	0.118249	0.144541	0.818105	0.413297	0.54099
IPO11	371.937	-0.0437756	0.122031	-0.358726	0.7198	0.806487
FOLH1	13.5593	0.966387	0.601398	1.6069	0.108077	0.189783
EIF2AK1	2835.78	-0.10838	0.0656697	-1.65038	0.0988652	0.176433
NME8	1.40218	-1.56942	2.00047	-0.784525	0.432732	NA
EPDR1	460.323	0.292698	0.109001	2.68528	0.00724697	0.0188201
SNX10	75.9442	0.801789	0.245426	3.26693	0.0010872	0.00344218
SEPHS1	991.993	-0.180201	0.0813538	-2.21503	0.0267582	0.0588854
MRPL28	935.807	-0.228113	0.0868204	-2.62741	0.00860373	0.0218624
HBQ1	15.0238	-0.111047	0.569234	-0.195082	0.845329	0.900859
ITPKC	463.91	0.501801	0.108692	4.61671	3.89873e-06	1.94425e-05
CEACAM6	0.532411	-0.790228	3.07472	-0.257008	0.797172	NA
FAT2	17.0671	-0.778647	0.535568	-1.45387	0.145982	0.241198
RBM22	736.554	-0.203486	0.103441	-1.96718	0.0491627	0.0987312
TMED2	4711.7	0.379917	0.056753	6.69422	2.16822e-11	1.97936e-10
ERO1B	110.95	-0.136103	0.205383	-0.662681	0.507535	0.62998
ZFAND6	1127.54	-0.461876	0.0922658	-5.00593	5.55943e-07	3.15075e-06
HSD17B2	122.92	3.13383	0.252562	12.4082	2.35926e-35	8.27549e-34
TXLNG	353.236	0.282299	0.117349	2.40563	0.0161448	0.0380945
PPEF1	2.63534	-0.507071	1.23127	-0.411829	0.680465	0.776264
LAT2	17.8661	1.39232	0.516242	2.69704	0.00699597	0.0182413
HUWE1	7246.49	0.468108	0.0799906	5.85204	4.85583e-09	3.52563e-08
ZW10	633.131	0.228736	0.0967418	2.3644	0.0180595	0.0418977
ALG9	125.976	0.268819	0.205559	1.30774	0.19096	0.299046
MYBPC2	3.3421	-0.737285	1.14488	-0.643984	0.519586	0.640598
NOX4	182.957	-0.436445	0.204178	-2.13757	0.0325517	0.0694372
ACOX3	326.535	-0.136888	0.131458	-1.04131	0.297733	0.422247
MTMR2	1009.08	-0.000909211	0.0794727	-0.0114405	0.990872	0.993999
PPP1R15A	1601.31	0.279431	0.0764676	3.65424	0.000257942	0.000942558
HSD17B14	329.697	-1.8361	0.137319	-13.371	8.9327e-41	3.87515e-39
TRIP6	1321.9	-0.147016	0.0796115	-1.84667	0.0647953	0.12446
ACHE	164.587	-0.314327	0.179099	-1.75504	0.0792518	0.147007
FTL	48357.5	-0.538031	0.0658311	-8.17291	3.01033e-16	4.18971e-15
SRRT	1821.48	0.12849	0.0694669	1.84965	0.0643637	0.123799
BAX	1459.32	-0.733886	0.0799377	-9.18073	4.28167e-20	7.5433e-19
NLK	700.222	-0.149539	0.0947855	-1.57766	0.114644	0.199204
PIGS	1489.57	0.200154	0.0748265	2.6749	0.00747506	0.0193479
ADAMTS2	129.507	-0.260184	0.202556	-1.2845	0.198966	0.308943
TMPRSS11E	23.1332	-1.46661	0.451709	-3.2468	0.00116708	0.00366381
ATXN7L3	1451.92	-0.183439	0.0825257	-2.22281	0.0262289	0.0579334
PGS1	513.755	0.281019	0.108775	2.58348	0.00978078	0.024537
PSMC5	850.609	-0.439905	0.0932844	-4.71574	2.40837e-06	1.24405e-05
UIMC1	511.457	-0.350841	0.11027	-3.18166	0.00146433	0.00449635
CETP	1.59161	4.24752	1.98657	2.13812	0.0325069	NA
MMP2	9844.53	-0.548159	0.0597657	-9.1718	4.65168e-20	8.16745e-19
MT3	0.737906	3.12834	2.66979	1.17176	0.241295	NA
LPCAT2	488.95	0.390104	0.109579	3.56002	0.00037082	0.00131134
GNAO1	52.6316	1.17971	0.315678	3.73707	0.000186178	0.000698513
OGFOD1	740.446	0.351508	0.0919598	3.82241	0.000132155	0.000508947
SH3BP2	889.045	-0.00444139	0.0893266	-0.0497208	0.960345	0.97563
NOP14	460.786	0.433005	0.119797	3.6145	0.000300932	0.00108514
ADD1	3752.83	0.245984	0.0596592	4.12316	3.73717e-05	0.000159722
L2HGDH	252.196	0.260686	0.143422	1.81761	0.0691238	0.131109
TXNDC16	399.111	-0.712009	0.121475	-5.86134	4.5915e-09	3.33682e-08
RTRAF	2701.29	-0.274441	0.0675445	-4.06312	4.84215e-05	0.000203266
NID2	17228	-0.688058	0.0624424	-11.0191	3.09167e-28	8.16096e-27
GMCL1	551.926	-0.0641063	0.11163	-0.574275	0.565782	0.681002
SF3B2	3544.07	0.202372	0.0596784	3.39104	0.000696273	0.00231013
KLHL42	793.547	0.312819	0.102868	3.04097	0.00235815	0.00690334
GNAS	20587.6	-0.0579291	0.0575308	-1.00692	0.313971	0.440402
DNM1L	1708.24	-0.00980988	0.0673771	-0.145597	0.88424	0.9281
PTHLH	35.4545	-0.0428256	0.40849	-0.104839	0.916504	0.950061
PHACTR3	1.88913	-1.3463	1.55239	-0.867244	0.385809	0.513466
ERGIC2	933.861	0.0977012	0.0908218	1.07575	0.282041	0.404951
TFAP2C	4.66968	-1.6634	1.1949	-1.39208	0.163897	0.264978
AURKA	524.956	-0.310487	0.125022	-2.48345	0.0130115	0.0316034
CASS4	5.05176	0.82977	0.930172	0.892061	0.37236	0.500728
PIR	120.2	-1.20555	0.210488	-5.72743	1.01963e-08	7.15951e-08
AAMDC	147.043	-0.296592	0.192503	-1.54072	0.123385	0.211142
RFX2	36.4124	-0.144068	0.339066	-0.424897	0.670911	0.768405
METTL2A	245.913	0.240493	0.142811	1.684	0.0921823	0.166664
SULT2B1	2.97485	-0.794357	1.24207	-0.639543	0.52247	0.643419
ALG6	190.028	-0.00379785	0.159236	-0.0238505	0.980972	0.988333
CNOT3	726.279	-0.252866	0.0887205	-2.85015	0.00436992	0.012037
GP6	6.71568	1.35353	0.849234	1.59382	0.110976	0.194021
PTPN4	484.126	0.299525	0.104279	2.87234	0.00407447	0.0112931
DDX18	1655.16	0.247091	0.0704704	3.50631	0.00045436	0.00157634
KHSRP	2983.42	0.0954109	0.0621804	1.53442	0.124926	0.213204
GNA11	657.831	0.175392	0.095823	1.83038	0.0671937	0.128213
ASAP3	666.011	-0.314149	0.108331	-2.8999	0.00373278	0.0104464
EDEM2	490.692	0.0915169	0.10876	0.841454	0.400094	0.527654
DNMT3B	285.145	-0.0209827	0.139693	-0.150205	0.880603	0.925718
REM1	1.81969	1.14339	1.71181	0.667943	0.50417	0.627183
TPX2	2475.21	-0.012101	0.0828728	-0.146019	0.883907	0.927968
PDRG1	357.455	0.0940641	0.126681	0.742527	0.457768	0.583267
EPB41L1	662.004	0.0842641	0.0983779	0.856535	0.391702	0.51918
SLC15A1	0.375326	2.15001	3.75687	0.572288	0.567127	NA
DOCK9	940.837	-0.182741	0.0940576	-1.94286	0.0520332	0.103389
ANKRD10	2661.2	-0.292423	0.0692378	-4.22346	2.40583e-05	0.000106023
TGDS	377.241	0.13257	0.137842	0.961755	0.336173	0.463744
DOCK3	62.8764	-1.69513	0.283109	-5.98756	2.1301e-09	1.60884e-08
C3orf18	225.004	-0.521431	0.153819	-3.3899	0.000699178	0.00231829
COQ9	474.244	-0.0255601	0.113944	-0.224322	0.822507	0.885036
TMEM40	14.5535	2.26972	0.64025	3.54505	0.000392539	0.00138187
KIF9	56.4731	0.00101244	0.291277	0.00347586	0.997227	0.998188
ARHGAP28	648.319	1.58345	0.121206	13.0641	5.2781e-39	2.12406e-37
CRLS1	325.353	0.17474	0.148175	1.17929	0.238284	0.355668
DEFB127	0	NA	NA	NA	NA	NA
PPP1R13B	135.223	0.678293	0.191222	3.54716	0.000389414	0.00137149
ATRN	1872.74	0.181593	0.0727691	2.49547	0.0125789	0.0306779
SMOX	328.106	-0.110083	0.135638	-0.811595	0.417024	0.544769
SIGLEC1	2.17128	1.0073	1.53358	0.65683	0.51129	0.633184
FKBP1A	2406.77	-0.31294	0.0671729	-4.65872	3.18177e-06	1.61462e-05
NSFL1C	1301.56	0.11566	0.0772424	1.49737	0.134297	0.225601
SLC4A11	66.0435	-1.14347	0.270172	-4.23238	2.31234e-05	0.000102105
C20orf194	1040.14	0.173702	0.0805145	2.1574	0.0309747	0.0666206
ZNF343	190.869	0.398713	0.15943	2.50087	0.0123889	0.0302816
EBF4	45.3622	-1.00292	0.322648	-3.10842	0.00188092	0.00563012
CPXM1	2037.54	-0.709593	0.0811242	-8.74699	2.19118e-18	3.49646e-17
MAVS	1987.17	0.420249	0.0844992	4.97341	6.57844e-07	3.69066e-06
LZTS3	254.042	-0.273089	0.138718	-1.96867	0.0489914	0.0985171
F11	1.55191	0.603272	2.06359	0.292341	0.770026	NA
XRN2	1983.85	-0.240266	0.0672206	-3.57428	0.000351189	0.00124645
KIZ	298.942	-0.0362198	0.138586	-0.261353	0.79382	0.864059
DYNLL1	2893.45	0.0321323	0.0810039	0.396676	0.691606	0.784264
TESC	9.22729	1.11499	0.685784	1.62587	0.103977	0.183975
SNX5	1749.36	-0.287008	0.070421	-4.0756	4.58953e-05	0.000193234
RPL6	15911.5	-0.315507	0.0548635	-5.75076	8.88455e-09	6.2695e-08
SIRPG	0	NA	NA	NA	NA	NA
MAPKAPK5	576.856	-0.130089	0.10179	-1.27801	0.201246	0.311767
P2RX7	17.7794	0.284497	0.505133	0.563213	0.57329	0.687647
ESF1	495.828	-0.0355693	0.106524	-0.333908	0.738449	0.819626
RBBP9	466.787	-0.0505347	0.107842	-0.468601	0.639355	0.742818
ANAPC5	2501.32	0.142291	0.0642789	2.21365	0.0268529	0.0590438
SLC23A2	560.237	0.442305	0.103169	4.28717	1.80961e-05	8.11238e-05
SLC8B1	301.881	0.689838	0.128422	5.37164	7.80251e-08	4.94974e-07
TMEM230	1721.21	0.0502603	0.0677706	0.741624	0.458315	0.583822
DZANK1	83.7366	-0.574851	0.25696	-2.23712	0.0252783	0.0561443
KDM2B	557.771	-0.366598	0.108027	-3.39358	0.000689861	0.00229032
CFAP61	1.14427	0.674248	2.00096	0.336962	0.736145	NA
LHX5	0.359068	2.09562	3.823	0.548162	0.583581	NA
TASP1	138.892	-0.047332	0.185175	-0.255607	0.798255	0.867733
OAS1	0.509134	1.18442	3.12255	0.37931	0.704457	NA
GCN1	3907.58	0.324447	0.0720688	4.50191	6.7345e-06	3.23813e-05
RPLP0	27657.1	-0.0440605	0.0603559	-0.730012	0.465383	0.590891
PXN	786.858	0.0583641	0.0968207	0.602806	0.546638	0.665156
SIRT4	37.5119	-0.357047	0.334994	-1.06583	0.286499	0.409879
RPH3A	1.4178	4.07993	2.11949	1.92496	0.0542347	NA
KIF16B	259.292	-0.0589748	0.142394	-0.414166	0.678752	0.774821
TRMT6	264.82	0.310452	0.147834	2.1	0.0357286	0.0750625
CHGB	37.5527	0.705699	0.334188	2.11168	0.0347136	0.0732136
PEBP1	1962.68	-0.277585	0.0725082	-3.82832	0.000129019	0.00049773
TBX5	0.153399	-0.716439	4.08047	-0.175577	0.860626	NA
BRAP	477.46	0.0358306	0.106769	0.33559	0.73718	0.818553
ERP29	2388.48	-0.388786	0.0746414	-5.20871	1.90155e-07	1.14029e-06
NOS1	6.06709	3.59803	1.11585	3.22448	0.00126202	0.00393882
FUS	6340.6	0.347692	0.0675707	5.14561	2.66656e-07	1.57545e-06
IGBP1	507.705	-0.226328	0.108411	-2.08769	0.0368254	0.077034
FXYD5	978.915	-0.622435	0.0834098	-7.46238	8.49725e-14	9.68786e-13
ZNF302	662.781	-0.0497145	0.0961527	-0.517037	0.605131	0.7151
GRAMD1A	808.639	-0.395512	0.098193	-4.0279	5.62761e-05	0.000232787
FXYD3	0.287206	-1.53953	3.82193	-0.402816	0.687084	NA
HEPH	2813.93	0.49129	0.0661275	7.42943	1.09069e-13	1.2309e-12
CDIP1	830.116	0.0928086	0.0958665	0.968102	0.332993	0.460613
CMTM1	13.2883	0.64042	0.630258	1.01612	0.309571	0.435831
KCNH4	3.54433	0.0690181	1.07617	0.0641333	0.948864	0.96896
GANAB	12836.4	-0.0602646	0.0604756	-0.996511	0.319002	0.445213
GMIP	357.221	-0.4369	0.11731	-3.72432	0.000195843	0.000731428
RBM41	560.383	-0.0141332	0.0992085	-0.14246	0.886717	0.929604
BIRC5	472.628	0.337383	0.126013	2.67737	0.00742019	0.0192283
LAG3	5.47041	0.354021	0.879142	0.402689	0.687177	0.781314
MLF2	3266.7	-0.242371	0.0598075	-4.05252	5.06681e-05	0.00021133
OTUB2	56.2437	0.286805	0.297655	0.96355	0.335272	0.462902
DDX24	2344.93	-0.229001	0.0642984	-3.56154	0.000368685	0.00130439
ZBTB25	367.128	0.293738	0.126618	2.31987	0.0203481	0.0464391
NECAP1	393.86	0.0583201	0.118119	0.493739	0.62149	0.728025
ARHGAP4	80.9364	-0.00817846	0.251718	-0.0324906	0.974081	0.984511
ANKRD24	68.1852	0.809023	0.266382	3.03708	0.00238882	0.00697871
DHX32	493.501	-0.356397	0.110889	-3.21398	0.00130907	0.00406909
RCOR1	939.863	-0.46735	0.0912895	-5.11942	3.06471e-07	1.79638e-06
GPATCH2L	1048.64	-0.173983	0.096457	-1.80374	0.0712726	0.134431
LTBP4	1180.54	0.51347	0.111855	4.5905	4.42195e-06	2.1835e-05
BLVRB	403.014	0.175334	0.114009	1.5379	0.124072	0.212177
SLC9A1	375.101	-0.263801	0.128058	-2.06001	0.0393975	0.0816166
SPTLC1	1916.28	-0.030145	0.0671752	-0.448752	0.653611	0.754976
PAPOLA	3032.62	-0.161085	0.0655777	-2.4564	0.0140337	0.0337963
CCNK	363.578	0.486986	0.128615	3.78638	0.000152855	0.000582758
PCBP4	654.356	-0.192267	0.100706	-1.90919	0.0562381	0.110198
RGS1	35.5462	-3.31933	0.486769	-6.81911	9.1608e-12	8.72068e-11
YPEL3	261.954	-0.403872	0.138506	-2.91593	0.00354634	0.00998025
MRPS33	540.07	0.124818	0.112108	1.11337	0.265548	0.387378
NDUFB2	185.659	-0.14342	0.163356	-0.877954	0.379968	0.507826
NUDC	1368.4	0.240141	0.080163	2.99566	0.00273855	0.0079202
MAEA	1211.28	-0.18885	0.078818	-2.39603	0.0165739	0.038956
ICAM1	90.0994	1.27459	0.233442	5.45998	4.762e-08	3.10177e-07
STRN4	1286.71	-0.27825	0.0753446	-3.69303	0.000221595	0.000817886
IRAK3	22.4277	0.594532	0.433826	1.37044	0.17055	0.273378
LYZ	1.7089	-2.982	3.93327	-0.758148	0.448362	0.575284
SI	0	NA	NA	NA	NA	NA
MUL1	489.034	0.500611	0.11218	4.46257	8.09831e-06	3.83703e-05
TFAP4	129.187	0.26781	0.197795	1.35398	0.175743	0.280031
PDCD7	459.439	-0.0580096	0.106562	-0.544372	0.586186	0.699363
SPG21	1103.5	-0.448025	0.0822505	-5.44708	5.12048e-08	3.32276e-07
FETUB	0.576339	-1.08244	2.968	-0.364705	0.715332	NA
DNAJB11	1114.15	-0.235541	0.088503	-2.66138	0.00778199	0.0200491
P3H2	242.95	1.37735	0.150306	9.16367	5.0161e-20	8.78749e-19
THPO	5.17695	-0.896994	0.908666	-0.987155	0.323567	0.450253
CHRD	47.4417	0.210943	0.301043	0.700708	0.483485	0.607879
FLT3LG	1.29669	-2.53458	2.14707	-1.18048	0.237809	NA
RAB11FIP3	832.441	0.0554605	0.0928275	0.597458	0.550201	0.668313
GNPTG	671.862	-0.225503	0.100561	-2.24246	0.024932	0.0554939
ZNF268	359.489	0.276565	0.119542	2.31354	0.0206929	0.0471158
GOLGA3	3194.19	0.473177	0.0632847	7.47695	7.60666e-14	8.70434e-13
PABPC4	1763.62	0.159728	0.0765958	2.08534	0.0370385	0.0774174
CD209	0	NA	NA	NA	NA	NA
CERS4	347.59	-0.442453	0.137377	-3.22073	0.00127866	0.00398677
MCOLN1	253.468	-0.402091	0.141559	-2.84045	0.00450494	0.0123673
USP48	1775.7	-0.201615	0.0717638	-2.80943	0.00496296	0.0134587
EFNB1	818.523	-0.155015	0.0854299	-1.81452	0.0695971	0.131715
PDPR	856.526	0.204139	0.0961002	2.12423	0.0336507	0.0714097
AARS1	3812.96	0.612149	0.0617078	9.92013	3.40321e-23	6.9556e-22
GLG1	6672.02	0.13158	0.0533963	2.46422	0.013731	0.0331238
KIF4A	323.312	0.0355512	0.139803	0.254295	0.799268	0.868471
TNRC6A	2053.02	0.0539758	0.0758833	0.7113	0.476898	0.601784
PLEKHG2	1792.16	-0.579342	0.0696742	-8.31502	9.17394e-17	1.3266e-15
DLL3	29.8951	-1.05176	0.39054	-2.6931	0.00707914	0.0184304
NAT14	541.74	-0.460381	0.112781	-4.08208	4.46349e-05	0.000188437
PITPNM2	659.376	0.0203453	0.106892	0.190334	0.849047	0.903788
EXOC1	501.178	-0.103995	0.106161	-0.979589	0.327289	0.45425
RBM27	355.586	-0.10703	0.13221	-0.809543	0.418203	0.545927
POU4F3	2.84783	-0.291759	1.245	-0.234343	0.814718	0.880285
OSBPL8	1833.6	-0.224321	0.0772019	-2.90565	0.00366496	0.0102751
DTX2	124.623	-0.137486	0.198106	-0.694004	0.48768	0.611819
NLRC4	30.4412	0.066771	0.377986	0.176649	0.859784	0.911461
PUS7	309.904	0.590901	0.137228	4.30597	1.66258e-05	7.50522e-05
LAMB4	9.08213	0.664089	0.710223	0.935042	0.349767	0.478208
NRCAM	18.8308	-0.073005	0.48064	-0.151891	0.879273	0.924632
LAMB1	20375	0.357682	0.0664146	5.3856	7.2204e-08	4.59169e-07
SLC26A4	6.57195	-0.486263	0.837518	-0.5806	0.56151	0.677418
SLC26A3	0.174916	1.20711	4.08047	0.295827	0.767362	NA
DLD	1586.35	0.0188601	0.0713201	0.264443	0.791439	0.86213
WDR7	297.641	0.0615282	0.126791	0.485274	0.627482	0.732949
TXNL1	1182.12	0.0804751	0.0898584	0.895577	0.370479	0.498819
IL5RA	0.718135	3.09554	2.92308	1.059	0.289601	NA
ABCC6	80.3448	0.141817	0.236018	0.600871	0.547926	0.666307
CMTM6	1877.9	-0.546657	0.071754	-7.61849	2.56668e-14	3.05141e-13
ITGA6	1439.23	0.468139	0.0901345	5.19378	2.06062e-07	1.23147e-06
RAPGEF4	30.7296	-0.00867677	0.458453	-0.0189262	0.9849	0.990753
MAP3K20	1269.22	1.29293	0.0777484	16.6297	4.24777e-62	3.32436e-60
SMPX	28.7425	3.14211	1.02258	3.07272	0.00212121	0.00627936
FH	1086.48	-0.0223391	0.084581	-0.264114	0.791692	0.862345
SEL1L3	249.521	1.19905	0.153224	7.82548	5.05705e-15	6.40834e-14
TF	14.0314	-0.148443	0.541928	-0.273916	0.784149	0.856465
CDV3	3855.94	0.43594	0.0620226	7.02874	2.08414e-12	2.10359e-11
MYO15A	34.6834	0.398002	0.35594	1.11817	0.263494	0.385067
ALKBH5	1006.93	-0.0758229	0.0786797	-0.963691	0.335201	0.462902
APOH	0.896563	3.41639	2.30735	1.48066	0.138698	NA
NLRP1	46.4171	0.785787	0.326543	2.40638	0.0161116	0.0380299
PITPNM3	30.9581	0.635543	0.382449	1.66177	0.0965585	0.17307
SPAG7	854.62	-0.234922	0.0867563	-2.70784	0.00677228	0.0177204
ORC6	387.074	0.235674	0.116988	2.01452	0.0439554	0.0895605
ZFHX4	294.771	1.488	0.146132	10.1826	2.37049e-24	5.16336e-23
SLC17A6	0.375326	2.15001	3.75687	0.572288	0.567127	NA
CPA1	7.31004	-1.2748	0.858521	-1.48488	0.137576	0.230091
ZC3HC1	273.117	-0.576027	0.134912	-4.26966	1.95774e-05	8.74137e-05
ESR1	51.0806	0.34963	0.29702	1.17712	0.239146	0.35668
RGS17	56.794	-0.121931	0.29808	-0.409054	0.6825	0.777836
ANGPT2	14.2551	0.0127682	0.601065	0.0212426	0.983052	0.989469
TMEM101	437.452	-0.197388	0.11865	-1.66362	0.0961885	0.172526
CD200	153.524	0.964954	0.176828	5.45701	4.84209e-08	3.15262e-07
CCDC80	37959	3.25242	0.0780618	41.6647	0	0
CMA1	0.483639	1.10497	3.1798	0.347497	0.728218	NA
PSME1	743.001	-0.0773109	0.102825	-0.751868	0.45213	0.578403
PPP2R3C	198.958	0.187244	0.177039	1.05764	0.29022	0.41406
HAUS4	62.7415	-0.543109	0.279663	-1.94201	0.0521358	0.10354
JPH4	29.9727	1.14254	0.386861	2.95335	0.00314346	0.00896305
MYH7	7.94865	6.56254	1.35132	4.85639	1.19542e-06	6.47791e-06
CEBPE	0.589086	-1.08299	2.94561	-0.367663	0.713124	NA
SLC7A8	486.411	-0.336777	0.153708	-2.19102	0.0284506	0.0620401
OSGEP	591.739	0.105485	0.102727	1.02685	0.304491	0.430321
SLC22A17	997.615	-0.601859	0.0895589	-6.72026	1.81404e-11	1.66973e-10
RNF31	7.82261	-0.513863	0.749043	-0.686026	0.492696	0.616276
SCFD1	1488.49	-0.254902	0.0741644	-3.43699	0.000588216	0.00198502
G2E3	665.075	-0.21074	0.100606	-2.09469	0.0361982	0.0759394
HECTD1	2682.67	0.111291	0.072767	1.52941	0.126163	0.214786
HNRNPC	9098.12	-0.143669	0.0606301	-2.3696	0.0178075	0.0414117
RPGRIP1	6.78894	0.176111	0.821998	0.214247	0.830354	0.891059
SUPT16H	2848.1	-0.189892	0.0608513	-3.1206	0.00180486	0.005427
TOX4	1267.03	0.0595249	0.0796029	0.747773	0.454597	0.580415
GEMIN2	196.186	-0.478126	0.157092	-3.0436	0.00233766	0.0068524
TGM1	54.1004	0.178301	0.28931	0.616299	0.537697	0.657
TINF2	437.993	-0.187234	0.117042	-1.59971	0.109662	0.19209
DAZL	0.187663	1.20711	4.08047	0.295827	0.767362	NA
TBL1Y	11.1844	0.181835	0.616683	0.294859	0.768101	0.844266
SEMA6A	838.931	-1.67509	0.0975757	-17.1671	4.68107e-66	4.09567e-64
TRPM7	1486.12	-0.206404	0.0845334	-2.44169	0.0146187	0.0349794
TYRO3	460.175	-0.717893	0.11024	-6.51206	7.41249e-11	6.47097e-10
WDR76	163.389	1.30721	0.178929	7.30573	2.7577e-13	3.00549e-12
CAPN3	21.683	1.00809	0.502376	2.00664	0.0447877	0.090972
SNAP23	546.131	0.46244	0.109974	4.205	2.61087e-05	0.000114494
TBX15	1.91001	-1.3179	1.5469	-0.851968	0.394232	0.521956
PHGDH	6383.26	1.09437	0.0732975	14.9306	2.08502e-50	1.20267e-48
COL9A3	274.369	-0.462481	0.136906	-3.37809	0.000729922	0.00240639
EZR	6033.28	-0.424573	0.0653032	-6.50157	7.94868e-11	6.92353e-10
MYL6	4226.18	0.0533868	0.0896865	0.59526	0.551669	0.669605
AGO1	1337.51	-0.179683	0.0892463	-2.01334	0.0440788	0.0897834
TEKT2	5.4622	-0.0207412	0.895027	-0.0231738	0.981512	0.988532
CLSPN	302.167	0.547106	0.143154	3.82181	0.000132476	0.000510058
RFFL	136.075	0.282573	0.181977	1.5528	0.120472	0.207203
UNC13D	49.6272	1.06552	0.311165	3.42429	0.000616411	0.00206986
MFSD11	346.922	-0.368677	0.125381	-2.94046	0.00327724	0.00930532
DPYSL2	1470.77	0.242196	0.0854596	2.83405	0.00459628	0.0125892
TGFB2	919.145	-0.462277	0.0881532	-5.24402	1.57118e-07	9.55466e-07
GPATCH2	362.621	0.283102	0.12255	2.3101	0.0208826	0.047492
NUP50	1352.45	-0.220951	0.0794588	-2.78069	0.00542427	0.0145827
CDC45	202.012	1.03119	0.169889	6.06981	1.28062e-09	9.91273e-09
COMT	59.79	-0.106859	0.274485	-0.389308	0.697048	0.788271
ADA2	101.138	0.379855	0.224931	1.68876	0.0912648	0.165217
VNN3	0	NA	NA	NA	NA	NA
ECHDC1	1187.63	0.100483	0.0776845	1.29347	0.195847	0.305287
LRRFIP2	925.826	0.226066	0.0842442	2.68347	0.00728633	0.0189097
SEC22C	651.473	-0.152867	0.0960209	-1.59202	0.11138	0.194553
XYLB	90.7388	1.03902	0.229059	4.53605	5.73182e-06	2.78352e-05
HDAC6	820.627	-0.345269	0.0974903	-3.54157	0.000397748	0.00139863
OR1I1	0	NA	NA	NA	NA	NA
GABRP	5.10111	-4.66021	1.4288	-3.26162	0.00110778	0.00349737
KRT31	0	NA	NA	NA	NA	NA
CDC6	423.986	0.922778	0.115027	8.02224	1.03835e-15	1.3881e-14
UPRT	186.134	-0.511539	0.171565	-2.9816	0.00286749	0.00825323
CDC23	968.944	-0.0145887	0.0814544	-0.179103	0.857857	0.910409
AAAS	996.993	-0.125224	0.0871783	-1.43641	0.150885	0.247819
CBX5	3247.5	-0.0722138	0.0800375	-0.902249	0.366924	0.495489
FMO2	2.13704	0.983034	1.48739	0.660912	0.508669	0.631235
SUCO	2432.82	-0.359942	0.0689091	-5.22342	1.75645e-07	1.05863e-06
[truncated: 17,924 more rows]

## Sheet: sum_volcano-LM
gene	baseMean	logFC	lfcSE	stat	pvalue	padj
SST	1359.98	13.9426	1.1796	11.8198	3.0851e-32	3.47514e-31
AQP4	396.031	12.1628	1.18223	10.288	7.9789e-25	7.37195e-24
LRP2	590.155	11.7758	1.18129	9.96864	2.09072e-23	1.83818e-22
SMOC2	501.179	11.5402	1.18138	9.76834	1.53957e-22	1.31316e-21
FREM2	220.842	11.32	1.18508	9.55214	1.27045e-21	1.05108e-20
CHAT	207.584	11.2308	1.18579	9.47115	2.7678e-21	2.2641e-20
ITM2A	153.068	10.7909	1.18875	9.07751	1.11082e-19	8.60657e-19
MYCN	135.933	10.6203	1.18941	8.92902	4.29788e-19	3.25889e-18
ERBB4	114.581	10.3731	1.19159	8.70527	3.16815e-18	2.31443e-17
SLC18A3	112.164	10.3427	1.19139	8.68115	3.91792e-18	2.85303e-17
PODXL	8595.59	10.2559	0.219243	46.7788	0	0
DRD2	319.086	9.9949	1.02597	9.74188	1.99825e-22	1.69803e-21
CHST9	87.2099	9.97902	1.19785	8.33079	8.03055e-17	5.52801e-16
NELL1	82.0084	9.8905	1.19709	8.26214	1.4308e-16	9.73189e-16
UNC5D	71.7092	9.69713	1.19924	8.08604	6.16345e-16	4.06589e-15
NRXN1	68.118	9.6226	1.2011	8.01148	1.13332e-15	7.36983e-15
MYO3B	56.7007	9.3585	1.20481	7.76763	7.99653e-15	4.98894e-14
ABCC9	382.125	9.25411	0.730148	12.6743	8.20873e-37	1.0307e-35
SFRP5	48.1473	9.12217	1.2098	7.54026	4.69051e-14	2.80798e-13
PLEKHA7	1065.52	9.03288	0.40584	22.2573	9.59222e-110	3.34764e-108
FGF10	42.9962	8.95821	1.2184	7.35242	1.94645e-13	1.12602e-12
NXPH2	149.567	8.90093	1.03427	8.60602	7.56425e-18	5.45609e-17
TNNT1	222.308	8.88714	0.843628	10.5344	5.99405e-26	5.72335e-25
ZFP42	40.8752	8.88623	1.21817	7.29474	2.99246e-13	1.7101e-12
AQP1	9381.68	8.87239	0.134375	66.0272	0	0
SYT10	844.94	8.81464	0.42347	20.8153	3.14622e-96	9.63393e-95
CD22	38.9222	8.8146	1.2218	7.21446	5.41488e-13	3.04973e-12
FAT3	695.27	8.79619	0.463665	18.971	2.96263e-80	7.63785e-79
CAPN6	36.561	8.7259	1.2195	7.15534	8.34672e-13	4.66156e-12
NLGN4X	34.1987	8.62876	1.22057	7.06947	1.55527e-12	8.54864e-12
UPK3B	421.378	8.58724	0.554194	15.495	3.74945e-54	6.69622e-53
MEOX1	31.5336	8.51327	1.23072	6.91733	4.6023e-12	2.45456e-11
MYL7	60.636	8.49042	1.20469	7.04782	1.81742e-12	9.95192e-12
SLCO2B1	168.159	8.48442	0.845962	10.0293	1.133e-23	1.00667e-22
KRT4	30.6799	8.47205	1.2258	6.91146	4.79688e-12	2.55407e-11
NMUR1	27.3808	8.30913	1.23464	6.73002	1.69642e-11	8.7526e-11
MYO3A	26.709	8.27132	1.23741	6.68436	2.31942e-11	1.18484e-10
FSHR	25.8213	8.22433	1.23722	6.64741	2.983e-11	1.51558e-10
SLC17A8	24.7867	8.16516	1.23614	6.60535	3.96592e-11	1.9991e-10
KCNQ2	23.6069	8.09421	1.23923	6.53164	6.50516e-11	3.23417e-10
TPPP2	23.301	8.0768	1.24683	6.47785	9.3037e-11	4.57852e-10
VWA5B1	23.0138	8.05826	1.24273	6.4843	8.91474e-11	4.39116e-10
NIPAL1	119.701	7.99085	0.851548	9.38392	6.35661e-21	5.1393e-20
ARHGAP8	21.4166	7.95463	1.25168	6.35514	2.08232e-10	1.00102e-09
DPP6	19.3093	7.80301	1.26537	6.1666	6.97736e-10	3.23545e-09
RBFOX1	19.2323	7.79814	1.25635	6.20698	5.40114e-10	2.52728e-09
PROM1	104.021	7.78645	0.854385	9.11351	7.97556e-20	6.22164e-19
KCNA6	19.021	7.78267	1.2645	6.15472	7.52105e-10	3.47949e-09
SLN	18.7377	7.76248	1.26186	6.15161	7.66988e-10	3.54527e-09
FGF18	101.819	7.75788	0.855085	9.07264	1.1617e-19	8.98336e-19
RAPGEF5	18.4421	7.73884	1.25621	6.16044	7.25425e-10	3.35898e-09
FBN3	18.3323	7.73145	1.27533	6.06229	1.34194e-09	6.08152e-09
NCCRP1	18.3187	7.72836	1.25536	6.15631	7.4461e-10	3.44681e-09
ITIH3	17.7584	7.68404	1.26131	6.0921	1.11438e-09	5.08485e-09
ANXA8L1	402.394	7.62157	0.412526	18.4754	3.26089e-76	7.96973e-75
VIPR2	16.8126	7.6035	1.27769	5.95096	2.6658e-09	1.17838e-08
TMEM130	16.7	7.59545	1.26389	6.00959	1.85998e-09	8.34643e-09
PTPRZ1	16.6033	7.58576	1.26591	5.99234	2.06843e-09	9.23515e-09
MFAP5	60.0118	7.57839	1.051	7.21066	5.56819e-13	3.13387e-12
ASPG	239.149	7.57505	0.525555	14.4134	4.26084e-47	6.66392e-46
PSAPL1	16.3878	7.56755	1.2654	5.98034	2.22675e-09	9.91709e-09
LRRC55	16.1929	7.55061	1.26535	5.96722	2.41337e-09	1.07124e-08
SMPX	16.0386	7.53643	1.26654	5.95039	2.67508e-09	1.1815e-08
GRIK3	15.9628	7.53087	1.26981	5.93072	3.01617e-09	1.32702e-08
CPXM2	15.8962	7.52298	1.26948	5.92606	3.10294e-09	1.36205e-08
ELFN1	56.4626	7.48821	1.0496	7.13436	9.72392e-13	5.40616e-12
GALNT9	29.7357	7.45739	1.22606	6.08238	1.1841e-09	5.39219e-09
COL22A1	15.0304	7.4419	1.27668	5.82911	5.57227e-09	2.39686e-08
HCN4	14.9463	7.43529	1.27454	5.83371	5.42099e-09	2.33367e-08
PLPPR1	14.6089	7.40209	1.27646	5.79891	6.67483e-09	2.85269e-08
CDH1	28.3732	7.38889	1.22954	6.00947	1.86126e-09	8.34983e-09
SLC34A2	14.2442	7.36584	1.28415	5.73595	9.69688e-09	4.09066e-08
NTRK2	129.603	7.36444	0.666972	11.0416	2.4071e-28	2.47588e-27
ITLN2	14.0909	7.35215	1.33092	5.52412	3.31148e-08	1.3441e-07
CYP2A13	14.0257	7.34435	1.28511	5.71497	1.09722e-08	4.60918e-08
FGD3	27.4159	7.33982	1.23386	5.94866	2.70339e-09	1.19334e-08
SFRP2	49.2469	7.28837	1.05626	6.90016	5.19442e-12	2.75839e-11
CYP2W1	292.072	7.27586	0.432596	16.8191	1.7696e-63	3.6497e-62
MAG	13.3655	7.274	1.28305	5.6693	1.43381e-08	5.97603e-08
BEX5	13.174	7.25347	1.29066	5.61995	1.91007e-08	7.89313e-08
KCNK5	13.1169	7.24494	1.30089	5.5692	2.55914e-08	1.04885e-07
KCTD4	13.0996	7.24327	1.29323	5.60092	2.13219e-08	8.79053e-08
RPRM	12.909	7.22241	1.29421	5.58057	2.39728e-08	9.85043e-08
RBP7	69.2995	7.20336	0.86855	8.29355	1.09922e-16	7.52782e-16
SLITRK1	12.4879	7.17598	1.29409	5.54519	2.93628e-08	1.19698e-07
XKR4	12.3059	7.15494	1.29204	5.53771	3.0645e-08	1.24639e-07
MYH7	12.295	7.15084	1.33677	5.34935	8.82696e-08	3.45894e-07
KCNIP1	12.0743	7.12867	1.30411	5.4663	4.59516e-08	1.84221e-07
FAM110C	12.0537	7.1265	1.31453	5.42134	5.91539e-08	2.35437e-07
ANK1	11.7997	7.09386	1.3039	5.44049	5.31356e-08	2.12118e-07
KCNJ8	124.127	7.03863	0.613266	11.4773	1.71591e-30	1.85695e-29
MYH6	11.1886	7.01538	1.34374	5.22079	1.78166e-07	6.766e-07
ITGA6	1697.58	6.95687	0.25807	26.9573	4.68619e-160	2.60989e-158
RERG	10.7247	6.95649	1.30919	5.31357	1.07496e-07	4.17751e-07
NSG1	669.915	6.92728	0.257308	26.9222	1.20845e-159	6.6837e-158
NPPB	113.705	6.91246	0.618998	11.1672	5.90325e-29	6.19144e-28
GREB1L	825.948	6.89736	0.229655	30.0336	3.57928e-198	2.64867e-196
ATCAY	10.0176	6.85819	1.31733	5.20614	1.92804e-07	7.29934e-07
NXPH3	9.88578	6.83789	1.32824	5.14809	2.63151e-07	9.8207e-07
CGN	19.1278	6.81861	1.25195	5.44641	5.1396e-08	2.05533e-07
CYP1A2	9.7158	6.81271	1.33034	5.12102	3.03888e-07	1.127e-06
NEXMIF	9.69084	6.80964	1.32482	5.14004	2.74674e-07	1.02293e-06
MYT1	9.65015	6.80468	1.3316	5.11016	3.21894e-07	1.19073e-06
FMO1	18.4839	6.76713	1.25744	5.38166	7.38002e-08	2.91337e-07
PKHD1L1	68.6502	6.76644	0.757751	8.92964	4.27409e-19	3.24238e-18
DPYSL5	9.38906	6.76264	1.33797	5.05442	4.31696e-07	1.57972e-06
CD244	9.37958	6.76141	1.33441	5.06698	4.04171e-07	1.48171e-06
ERICH3	9.37912	6.76136	1.33654	5.05884	4.21818e-07	1.54534e-06
EDARADD	9.31045	6.75271	1.32738	5.08726	3.63272e-07	1.33822e-06
PTGIS	1599.86	6.72335	0.159716	42.0958	0	0
BICDL1	216.554	6.72236	0.423126	15.8874	7.75038e-57	1.43382e-55
NTSR1	8.99157	6.70144	1.34439	4.98474	6.20453e-07	2.23112e-06
ZNF385B	8.94508	6.69534	1.34379	4.98243	6.27908e-07	2.25742e-06
SERTM1	8.91574	6.69127	1.35963	4.9214	8.59273e-07	3.04807e-06
GKN1	17.3567	6.67568	1.26272	5.28677	1.24498e-07	4.80439e-07
CYP24A1	8.7682	6.66655	1.3458	4.95359	7.28576e-07	2.60062e-06
ALDH1A3	31.9366	6.66412	1.07666	6.18963	6.03049e-10	2.8127e-09
PLXNA4	669.851	6.65697	0.238652	27.894	3.15058e-171	1.90033e-169
INMT	63.3161	6.65211	0.759966	8.75317	2.07442e-18	1.52823e-17
ZMAT4	63.4362	6.65104	0.761649	8.73242	2.49271e-18	1.82852e-17
PLD5	8.44514	6.61156	1.35184	4.8908	1.00427e-06	3.53807e-06
FRMD4B	517.548	6.59137	0.263859	24.9807	9.90836e-138	4.46127e-136
ADAMTS18	16.2748	6.58341	1.26995	5.18401	2.17163e-07	8.15969e-07
SGSM1	29.9955	6.5669	1.0813	6.07314	1.25433e-09	5.70064e-09
ITGAX	29.6963	6.55922	1.07665	6.09226	1.11328e-09	5.08128e-09
SEMA3E	1019.88	6.55093	0.187382	34.9604	9.00813e-268	1.00689e-265
TPBGL	28.4994	6.49897	1.07851	6.0259	1.68173e-09	7.56352e-09
NEBL	895.556	6.49052	0.196808	32.9789	1.62852e-238	1.53119e-236
NHLH2	7.75025	6.4874	1.38058	4.69904	2.61381e-06	8.84241e-06
ANXA8	374.343	6.45714	0.295785	21.8306	1.1898e-105	3.97031e-104
STX11	69.4217	6.45287	0.690143	9.35005	8.76025e-21	7.05054e-20
MYH14	7.55441	6.45114	1.36223	4.73571	2.18292e-06	7.42537e-06
GRM2	7.43369	6.42592	1.37168	4.68471	2.80363e-06	9.44827e-06
SEZ6L	7.41474	6.42289	1.36871	4.69267	2.69659e-06	9.11446e-06
FAM163A	7.33381	6.40989	1.38325	4.63392	3.58802e-06	1.19506e-05
CXCR2	39.3805	6.37763	0.893883	7.13475	9.69606e-13	5.39255e-12
MYL2	7.14926	6.36788	1.42926	4.45538	8.37452e-06	2.68253e-05
ANGPTL7	7.07388	6.35463	1.38945	4.57348	4.79699e-06	1.57995e-05
ACTC1	25.7007	6.34288	1.11043	5.71211	1.11585e-08	4.68377e-08
BMP5	178.491	6.336	0.412523	15.3591	3.07612e-53	5.39723e-52
URAD	6.88796	6.31646	1.37788	4.5842	4.55726e-06	1.50378e-05
TMEM132E	75.9818	6.31596	0.63088	10.0114	1.35884e-23	1.20331e-22
CARNS1	578.207	6.31392	0.229679	27.4902	2.29921e-166	1.33638e-164
CBLN2	6.86069	6.31181	1.38024	4.57297	4.8085e-06	1.58342e-05
CSF2RA	24.4728	6.28114	1.09164	5.75384	8.72401e-09	3.69488e-08
SMOC1	208.514	6.27933	0.377211	16.6467	3.19654e-62	6.44306e-61
GRP	6.65627	6.26932	1.38882	4.51412	6.358e-06	2.06641e-05
GRIN2A	6.53601	6.24081	1.40148	4.45301	8.46747e-06	2.71013e-05
DCAF12L1	6.4803	6.23071	1.39445	4.4682	7.88791e-06	2.53785e-05
LAMA3	697.461	6.22035	0.204958	30.3493	2.56452e-202	1.94272e-200
GFRA1	667.52	6.21093	0.208044	29.8539	7.81641e-196	5.65328e-194
CNGA1	6.24976	6.18006	1.45776	4.23943	2.24086e-05	6.86824e-05
NPHS1	6.16974	6.1581	1.40038	4.39744	1.09536e-05	3.46354e-05
OLFML1	33.2787	6.13917	0.902838	6.79986	1.04723e-11	5.47203e-11
MLC1	6.00556	6.11871	1.42808	4.28458	1.83083e-05	5.6527e-05
TAC3	121.441	6.11776	0.468241	13.0654	5.19086e-39	6.85708e-38
PREX2	5.93457	6.10448	1.44001	4.23919	2.24332e-05	6.87315e-05
FGD5	11.6649	6.09308	1.30056	4.68496	2.80014e-06	9.4385e-06
ITGA9	270.457	6.09148	0.31196	19.5265	6.53828e-85	1.77735e-83
TMEM272	42.8992	6.0862	0.780499	7.79784	6.29772e-15	3.95376e-14
SLC4A9	5.80785	6.07132	1.42577	4.25827	2.06011e-05	6.33857e-05
GJA5	5.80437	6.07066	1.41679	4.28481	1.82899e-05	5.64921e-05
ALPP	21.0675	6.06425	1.10618	5.48218	4.20124e-08	1.68938e-07
AKAP6	3074.65	6.052	0.0995424	60.7982	0	0
ELF3	31.2119	6.04318	0.903623	6.68772	2.26667e-11	1.15863e-10
HTR1E	5.65199	6.03117	1.43821	4.19353	2.74642e-05	8.31889e-05
FOXE1	5.65083	6.03088	1.42075	4.24485	2.18743e-05	6.71092e-05
SMPD3	31.212	6.02947	0.898984	6.70698	1.9869e-11	1.01954e-10
CLIC3	5.64297	6.02926	1.41756	4.25328	2.10662e-05	6.47292e-05
CNTN5	72.2045	6.01977	0.596028	10.0998	5.53486e-24	4.97297e-23
RNF182	11.0667	6.01769	1.30876	4.59801	4.26548e-06	1.41012e-05
TGFB2	174.43	6.01725	0.378335	15.9046	5.89217e-57	1.09385e-55
PTPRT	61.456	6.01302	0.636021	9.45411	3.25767e-21	2.65667e-20
NDNF	51.0573	6.0023	0.698564	8.59234	8.52184e-18	6.12744e-17
PYGM	223.798	6.00172	0.335308	17.8991	1.19841e-71	2.76014e-70
IRAG2	20.401	5.99656	1.09754	5.46365	4.66452e-08	1.86861e-07
SHISAL1	141.21	5.98812	0.418053	14.3238	1.55359e-46	2.38546e-45
LUZP2	141.025	5.98658	0.418197	14.3152	1.75808e-46	2.69685e-45
RAP1GAP2	59.613	5.97394	0.638569	9.3552	8.34434e-21	6.72257e-20
C2orf72	268.696	5.96805	0.303191	19.6842	2.94798e-86	8.19486e-85
SORBS2	117.705	5.95294	0.452463	13.1567	1.55641e-39	2.07833e-38
TNNC1	215.111	5.95186	0.342526	17.3764	1.24526e-67	2.74163e-66
DAB1	19.1483	5.91395	1.10653	5.34461	9.06116e-08	3.54637e-07
CPNE5	28.6126	5.90485	0.902886	6.53998	6.15281e-11	3.06185e-10
GALNT8	5.17377	5.90133	1.47952	3.98869	6.64379e-05	0.000191583
ROPN1L	5.14972	5.89556	1.4586	4.04194	5.30113e-05	0.000154594
LBHD2	18.8141	5.89311	1.10803	5.31856	1.04589e-07	4.07049e-07
CRABP1	5.10626	5.88547	1.44055	4.08558	4.39669e-05	0.000129494
SELP	5.0806	5.87957	1.44656	4.06452	4.81323e-05	0.000141061
COL23A1	28.1036	5.87835	0.902665	6.51222	7.40502e-11	3.669e-10
ST8SIA2	5.06834	5.87666	1.45712	4.03308	5.50504e-05	0.000160132
EMP2	1083.59	5.8636	0.151717	38.6483	0	0
ZDHHC15	18.2394	5.85382	1.11197	5.26438	1.40667e-07	5.41006e-07
B3GAT1	18.3512	5.85033	1.1205	5.22119	1.77774e-07	6.75269e-07
TUBB4A	4.97607	5.84586	1.46787	3.98254	6.81837e-05	0.00019644
CAMK2B	4.93744	5.83666	1.48321	3.93515	8.31447e-05	0.000236928
IL1RAPL2	4.93699	5.83646	1.44724	4.03281	5.51136e-05	0.000160287
OR51E1	4.93306	5.83554	1.44912	4.02696	5.65033e-05	0.000164119
HS3ST4	4.93144	5.83514	1.45138	4.02042	5.80935e-05	0.000168545
RNF175	4.88173	5.82303	1.4876	3.91436	9.06427e-05	0.000256612
EPHB6	44.566	5.80921	0.703038	8.26301	1.42039e-16	9.67339e-16
HUNK	232.169	5.80598	0.312824	18.5599	6.78722e-77	1.67936e-75
CADM2	17.7726	5.79818	1.11156	5.21624	1.82588e-07	6.92733e-07
EYA2	4.77997	5.78881	1.47073	3.93602	8.28425e-05	0.000236161
STEAP4	4.77442	5.78739	1.46024	3.9633	7.39193e-05	0.000211781
NFATC2	691.391	5.78519	0.182523	31.6956	1.78581e-220	1.52644e-218
CNTNAP2	69.7784	5.77912	0.562178	10.2799	8.68313e-25	8.01334e-24
GRID1	9.18497	5.74453	1.3389	4.29049	1.78279e-05	5.51077e-05
CNTN1	9.1644	5.74177	1.32831	4.3226	1.542e-05	4.79801e-05
ALOX5	4.58226	5.72905	1.47592	3.88168	0.000103739	0.000291673
RAB39A	4.55498	5.72203	1.47343	3.88347	0.000102975	0.000289933
PALD1	92.0353	5.70934	0.479903	11.8969	1.22875e-32	1.39293e-31
ADRA1B	4.42756	5.67817	1.48371	3.82702	0.000129704	0.000360053
NELL2	39.9057	5.65673	0.716206	7.89819	2.82987e-15	1.80569e-14
TRIML2	32.1982	5.65274	0.801217	7.05519	1.72368e-12	9.44831e-12
SCTR	16.1665	5.6515	1.12561	5.02083	5.14474e-07	1.86428e-06
PLAC8	8.52659	5.64093	1.35892	4.15103	3.30987e-05	9.92962e-05
CLSTN2	576.515	5.63019	0.191159	29.453	1.15384e-190	8.01867e-189
MYMK	4.26454	5.62366	1.57461	3.57146	0.00035499	0.000927303
KLRG2	4.24095	5.61676	1.52472	3.68379	0.000229792	0.000616171
KRT80	15.624	5.61474	1.14851	4.88871	1.01498e-06	3.57422e-06
CNTN6	249.129	5.61438	0.286645	19.5865	2.01592e-85	5.527e-84
RHBDL3	4.23101	5.61388	1.49175	3.76327	0.000167703	0.000457357
MGP	309.973	5.60234	0.254543	22.0094	2.34293e-107	7.95102e-106
TCERG1L	4.18639	5.60132	1.51508	3.69704	0.000218132	0.000587468
TOGARAM2	15.3647	5.59851	1.13178	4.94667	7.54952e-07	2.69176e-06
COL8A2	545.653	5.58755	0.197233	28.3297	1.48987e-176	9.37561e-175
TAFA3	61.3014	5.58695	0.569823	9.8047	1.07462e-22	9.22982e-22
APLNR	30.3369	5.57515	0.805958	6.91742	4.59939e-12	2.45382e-11
CDH3	354.335	5.56228	0.235647	23.6043	3.48295e-123	1.37801e-121
TMEM151A	338.705	5.55999	0.241222	23.0492	1.49723e-117	5.63101e-116
SEMA5B	52.5029	5.55889	0.606475	9.16589	4.91388e-20	3.85206e-19
ALB	22.2807	5.55865	0.949335	5.85531	4.76115e-09	2.06351e-08
TBX4	1163.15	5.55632	0.134161	41.4152	0	0
SPANXB1	4.06729	5.55614	1.50809	3.68423	0.000229394	0.000615207
KCNE1B	4.06613	5.5559	1.53323	3.62365	0.00029048	0.000767316
REN	22.7385	5.5548	0.926168	5.99762	2.00231e-09	8.95245e-09
ID4	80.7907	5.54911	1.76936	3.13623	0.00171135	0.00403632
ADAMTS20	183.99	5.52807	0.320582	17.2438	1.24479e-66	2.70335e-65
TMEM255A	531.984	5.51792	0.305702	18.05	7.89216e-73	1.84968e-71
TMEM108	72.3596	5.50539	0.510736	10.7793	4.31049e-27	4.26618e-26
ARHGDIG	14.4178	5.503	1.13608	4.84385	1.27344e-06	4.43941e-06
GOLGA8K	3.90427	5.49639	1.5633	3.51589	0.000438282	0.00113211
MUC13	3.89363	5.49295	1.52231	3.6083	0.000308212	0.000810807
KCNN2	594.483	5.49091	0.30927	17.7544	1.59265e-70	3.62635e-69
AJAP1	3.86958	5.4857	1.52057	3.60765	0.000308985	0.000812573
EPHA10	14.2698	5.46551	1.13588	4.8117	1.49651e-06	5.17306e-06
ANO2	3.74448	5.43493	1.56981	3.46215	0.000535882	0.0013635
FAM155B	3.70818	5.42314	1.52872	3.54752	0.000388879	0.00100948
LGI2	3.70263	5.42139	1.53273	3.53708	0.000404581	0.00104862
ACSM1	3.69083	5.41767	1.54536	3.50577	0.000455288	0.00117282
GCNT2	102.296	5.40909	0.41706	12.9696	1.82042e-38	2.36566e-37
TRIM72	3.66194	5.40822	1.56768	3.44982	0.00056096	0.00142332
EVX1	7.31493	5.40777	1.43276	3.77438	0.000160404	0.000438722
CRYGD	7.12464	5.37469	1.41924	3.78702	0.000152467	0.000418447
SH3TC2	86	5.36591	0.45037	11.9144	9.95422e-33	1.13164e-31
CXADR	268.193	5.35298	0.257658	20.7756	7.20217e-96	2.19694e-94
GABRA3	3.5144	5.34704	1.54533	3.46012	0.00053993	0.00137315
KLHL34	3.50815	5.34486	1.60832	3.32326	0.000889715	0.00218923
LRRN3	161.481	5.34325	0.331064	16.1396	1.34337e-58	2.55928e-57
GJA3	3.49983	5.3421	1.57448	3.39294	0.000691478	0.00173075
GPA33	3.49821	5.34161	1.55623	3.4324	0.000598255	0.00151186
EDA	45.675	5.33767	0.61276	8.71087	3.01555e-18	2.20496e-17
CLEC4M	3.48319	5.33636	1.58262	3.37185	0.000746639	0.00186037
DCAF12L2	19.4591	5.3358	0.93309	5.71842	1.07517e-08	4.52013e-08
TRIM71	38.5682	5.33269	0.664663	8.02315	1.03071e-15	6.71897e-15
NHSL2	895.507	5.33205	0.144085	37.0063	9.07125e-300	1.22877e-297
ELAVL3	3.47094	5.33188	1.61634	3.29874	0.000971186	0.00237325
ENTPD3	248.976	5.31419	0.27448	19.3609	1.64852e-83	4.42856e-82
DKK2	6.79744	5.30486	1.39011	3.81614	0.000135555	0.000375058
PLEK2	156.694	5.29346	0.329255	16.0771	3.69469e-58	6.99714e-57
EN1	3.39091	5.2916	1.60242	3.30224	0.000959145	0.00234681
FAM83F	3.38814	5.29069	1.61333	3.27937	0.00104041	0.00253504
CADPS	3.38305	5.28882	1.60159	3.30223	0.000959192	0.00234681
EDN3	3.3775	5.28669	1.57797	3.3503	0.000807238	0.00199921
TAGLN3	3.36847	5.28512	3.66156	1.4434	0.148906	0.224499
RASSF6	6.73625	5.28433	1.39664	3.78359	0.000154581	0.000423739
PAK5	3.33958	5.27335	1.56465	3.37032	0.000750817	0.00186932
DNAAF4	6.6321	5.26812	1.39173	3.78531	0.00015352	0.000421046
HCN1	3.31669	5.26522	1.58338	3.32532	0.000883181	0.00217482
IGLON5	18.1563	5.23088	0.943759	5.5426	2.98006e-08	1.21328e-07
ANKRD29	71.3269	5.20652	0.473597	10.9936	4.10378e-28	4.19672e-27
CTTNBP2	82.5521	5.20075	0.439599	11.8307	2.70976e-32	3.05666e-31
CCDC60	6.33586	5.19822	1.39924	3.71502	0.000203184	0.000549247
GPR4	3.16013	5.19325	3.92158	1.32427	0.185412	0.269396
STXBP5L	34.9887	5.18783	0.670826	7.73349	1.04637e-14	6.49019e-14
KCNJ3	6.28905	5.18656	1.40059	3.70312	0.000212962	0.00057461
SMIM32	17.747	5.18647	0.943688	5.49596	3.88587e-08	1.56729e-07
JPH2	116.799	5.18185	0.371713	13.9405	3.59608e-44	5.32713e-43
KLF5	670.136	5.16567	0.284898	18.1317	1.79181e-73	4.243e-72
LINGO1	237.922	5.14482	0.260278	19.7666	5.76938e-87	1.61786e-85
ITLN1	39.1067	5.13729	0.65124	7.88847	3.0591e-15	1.94885e-14
PCARE	3.02554	5.13008	3.59593	1.42663	0.153685	0.230549
MYL4	16.8111	5.12979	0.949257	5.404	6.51694e-08	2.58542e-07
CA12	643.383	5.12078	0.15868	32.2711	1.77963e-228	1.59807e-226
ADRB2	2.99272	5.11471	1.60566	3.18543	0.00144541	0.00344427
BRINP1	5.98623	5.11401	1.40705	3.63456	0.000278456	0.000736895
BMP7	11.2464	5.11093	1.15763	4.41498	1.01019e-05	3.205e-05
ASZ1	16.6557	5.11008	0.945444	5.40495	6.4826e-08	2.57244e-07
TNNT2	178.396	5.10752	0.30202	16.9112	3.71911e-64	7.7606e-63
NR0B1	2.97492	5.10746	1.68028	3.03965	0.0023685	0.00545427
ADAMTS8	2.96706	5.10455	1.62375	3.14368	0.00166836	0.003939
FGA	2.96706	5.10455	1.62375	3.14368	0.00166836	0.003939
CRYGN	5.91749	5.10246	1.44799	3.52382	0.000425369	0.00110036
TINAGL1	957.046	5.08682	0.132561	38.3735	0	0
RGCC	496.864	5.07098	0.282323	17.9616	3.89113e-72	9.00084e-71
GPC3	787.962	5.07055	0.141188	35.9135	1.88196e-282	2.21186e-280
SEMA3D	53.7555	5.06985	0.526499	9.62937	6.0095e-22	5.02647e-21
C4BPB	16.1056	5.06057	0.949951	5.3272	9.97401e-08	3.88935e-07
MPPED2	31.9565	5.0591	0.684532	7.3906	1.46167e-13	8.51121e-13
SERTAD4	91.2945	5.0591	0.403463	12.5392	4.55718e-36	5.64666e-35
ISM1	26.7515	5.05019	0.745969	6.76998	1.288e-11	6.69945e-11
SCN7A	26.0405	5.0357	0.755108	6.66885	2.57809e-11	1.31362e-10
AC005696.4	2.83686	5.03567	1.63931	3.07182	0.00212757	0.004935
ATP6V0A4	2.82345	5.03007	1.62281	3.0996	0.0019378	0.00452568
RAB37	20.6479	5.02193	0.84257	5.96025	2.51856e-09	1.11638e-08
CRB2	1197.49	5.01742	0.11972	41.9097	0	0
ABCB1	2.79108	5.01645	1.6555	3.03017	0.00244418	0.00561641
WFIKKN2	2.78553	5.01404	1.66273	3.01556	0.00256509	0.0058723
TNNI1	285.6	5.01367	0.232646	21.5506	5.22226e-103	1.7105e-101
FMO2	2.7816	5.0122	1.69009	2.96565	0.00302048	0.00682875
RNASE2	2.77605	5.00973	1.69939	2.94796	0.0031988	0.00720237
FGFR3	170.401	4.99956	0.303196	16.4895	4.3635e-61	8.62128e-60
RIBC2	20.0967	4.97204	0.837122	5.93945	2.85983e-09	1.26101e-08
VSIR	481.73	4.95826	0.173771	28.5333	4.52313e-179	2.90352e-177
WNT9B	2.68655	4.95505	1.72194	2.8776	0.00400719	0.00887993
KIAA0040	25.0637	4.95386	0.790284	6.26846	3.64633e-10	1.7269e-09
MS4A15	2.6692	4.94925	3.54819	1.39486	0.163057	0.242537
SLC6A11	2.66598	4.94754	3.56446	1.38802	0.165131	0.245166
IRX3	2.6514	4.93892	1.65047	2.99243	0.00276769	0.00629494
FGL2	413.593	4.93593	0.186343	26.4885	1.31616e-154	6.87499e-153
SFRP4	2.63915	4.93349	1.65129	2.98766	0.00281125	0.00638735
ATAD3C	2.6269	4.92799	1.66949	2.95179	0.00315942	0.00712373
PRIMA1	2.62181	4.92569	1.68217	2.92818	0.00340957	0.00764355
MYLK3	166.768	4.92566	0.289865	16.9929	9.26209e-65	1.94031e-63
KCNQ1	5.24737	4.92304	1.42989	3.44295	0.0005754	0.00145776
CGNL1	750.63	4.91626	0.139509	35.2398	4.91901e-272	5.57628e-270
TCTEX1D1	38.7106	4.90287	0.601468	8.1515	3.5944e-16	2.40087e-15
SRCIN1	23.7439	4.89064	0.754165	6.48484	8.88263e-11	4.3767e-10
MATK	9.42616	4.88713	1.19177	4.10073	4.11841e-05	0.000121792
FAM189A1	190.74	4.88544	0.267224	18.2822	1.14704e-74	2.73645e-73
DSCAM	5.10866	4.87866	1.52491	3.19931	0.00137757	0.00329672
GABRA5	28.4844	4.87248	0.685119	7.11188	1.14475e-12	6.34014e-12
ERVH48-1	367.973	4.86685	0.196305	24.7923	1.08664e-135	4.81131e-134
HOOK1	47.2344	4.86661	0.531985	9.14802	5.79845e-20	4.53658e-19
EBF2	5.04295	4.86571	1.44323	3.37141	0.000747837	0.00186306
RELN	454.413	4.85749	0.178078	27.2774	7.86962e-164	4.49243e-162
LRRC4B	107.277	4.85634	0.352813	13.7646	4.16011e-43	5.99595e-42
ALPG	2.47775	4.84097	1.73454	2.79092	0.00525581	0.011405
NRN1	2.4715	4.83802	1.74681	2.76963	0.00561193	0.0121087
RNASE3	2.47104	4.83768	1.70138	2.84339	0.0044637	0.00979917
TENM2	37.3329	4.83607	0.600321	8.0558	7.89593e-16	5.17672e-15
HLF	2.46479	4.83476	1.76111	2.74529	0.0060458	0.0129678
C1QL4	2.46433	4.83448	1.68609	2.86727	0.00414035	0.00914586
TCEAL2	13.8397	4.83409	0.976434	4.95076	7.39228e-07	2.63628e-06
OLFM3	2.46318	4.83396	1.68139	2.87497	0.0040406	0.00894404
COL9A3	862.451	4.82774	0.129912	37.1616	2.84906e-302	3.95994e-300
RALYL	2.44815	4.82674	1.69295	2.85108	0.00435706	0.00958218
NPAS4	2.44538	4.82535	1.70503	2.83006	0.00465391	0.0101916
CEMIP	988.585	4.82124	0.120812	39.907	0	0
RIMKLA	4.87929	4.813	1.45345	3.31142	0.000928225	0.00227627
PVALEF	4.88032	4.80952	1.47569	3.25917	0.00111738	0.00271142
ZNF185	854.009	4.80829	0.133298	36.0718	6.2851e-285	7.66878e-283
E2F8	173.699	4.7828	0.280995	17.0209	5.74441e-65	1.20655e-63
PRKCB	182.56	4.77369	0.274366	17.399	8.39992e-68	1.85705e-66
RASD2	39.8068	4.77095	0.57061	8.36114	6.21159e-17	4.29996e-16
TXNRD2	35.3533	4.77017	0.599532	7.95647	1.7701e-15	1.14086e-14
NPY4R	4.71349	4.76074	1.4903	3.19448	0.00140083	0.00334892
DLG2	205.226	4.75405	0.256055	18.5665	5.99552e-77	1.48577e-75
GPR27	26.2876	4.75321	0.690598	6.88274	5.87102e-12	3.11045e-11
SLC2A1	4761.03	4.75218	0.0624471	76.0993	0	0
DOC2B	2.31957	4.74652	3.49858	1.3567	0.174877	0.256797
FRMPD1	21.6991	4.73863	0.763815	6.20389	5.5083e-10	2.57365e-09
MAOB	2.30177	4.73445	1.71752	2.75657	0.00584114	0.0125642
PIP5K1B	25.6969	4.73109	0.698517	6.77304	1.26102e-11	6.56337e-11
ISX	2.29506	4.73102	1.71007	2.76657	0.00566501	0.0122084
SHISA6	2.2939	4.73049	1.73665	2.72392	0.00645127	0.0137563
PTCHD1	2.29229	4.7296	1.71522	2.75743	0.0058257	0.0125344
RAET1E	2.28997	4.72849	1.78554	2.64821	0.00809196	0.0169207
GPR101	2.28397	4.72484	3.50334	1.34866	0.177445	0.25978
RNASE13	2.27888	4.72275	1.71656	2.75129	0.00593618	0.0127515
GFRA2	2.27611	4.7213	1.72008	2.74481	0.00605461	0.0129832
SLITRK2	2.26824	4.71705	1.77564	2.65654	0.00789478	0.0165279
ANKFN1	2.26269	4.71415	1.76691	2.66802	0.00763005	0.0160282
CCDC70	2.25992	4.71267	1.76948	2.66331	0.00773755	0.0162284
ALK	4.57763	4.71088	1.47669	3.19017	0.00142189	0.00339419
CYP2F1	2.25876	4.70932	3.48904	1.34975	0.177097	0.259414
DRD1	51.1359	4.70622	0.501333	9.38742	6.14888e-21	4.97387e-20
NPAP1	4.5419	4.70531	1.46293	3.21635	0.00129831	0.00312016
BACH2	134.722	4.70066	0.303815	15.4721	5.35109e-54	9.5247e-53
EZR	7588.07	4.69159	0.0557416	84.1668	0	0
SYT17	45.621	4.68774	0.528096	8.87668	6.88827e-19	5.1712e-18
RAB11FIP4	162.344	4.68755	0.277612	16.8852	5.77743e-64	1.1993e-62
ADCY2	78.8822	4.68672	0.397221	11.7988	3.96024e-32	4.44526e-31
ADRA2A	62.4837	4.68466	0.444437	10.5407	5.60975e-26	5.35961e-25
SLC24A3	20.8092	4.67078	0.771441	6.05462	1.40751e-09	6.36068e-09
PTGS1	41.1559	4.66916	0.553678	8.43298	3.36973e-17	2.36236e-16
ART4	8.21463	4.66065	1.20403	3.87087	0.000108449	0.00030406
KRT3	16.2991	4.65936	0.860158	5.41686	6.06542e-08	2.41108e-07
GATA5	251.648	4.63998	0.223364	20.7732	7.56266e-96	2.30251e-94
SALL4	113.268	4.63018	0.336719	13.7509	5.03099e-43	7.2381e-42
MROH9	2.14198	4.62882	1.79946	2.57234	0.0101015	0.0206876
DCLK3	2.1392	4.62711	1.77485	2.60705	0.00913261	0.0188916
MTNR1A	2.13643	4.62556	1.77518	2.60568	0.00916926	0.0189601
ACTA1	2.12857	4.62129	1.79583	2.57335	0.0100719	0.020642
SORCS1	2.12695	4.62025	1.76617	2.61597	0.00889752	0.0184507
HTR2B	2.12695	4.62025	1.76617	2.61597	0.00889752	0.0184507
KRT7	2.12579	4.61962	1.76311	2.62016	0.00878878	0.0182465
MRAP2	11.8312	4.61704	1.00246	4.60571	4.1107e-06	1.36177e-05
RIPPLY3	2.12025	4.6165	1.75062	2.63707	0.00836259	0.0174296
PHYHIPL	2.11515	4.61377	1.81464	2.54253	0.0110054	0.0223492
DIPK1C	2.11077	4.61125	1.75176	2.63235	0.00847972	0.0176599
CAGE1	2.10567	4.6084	1.79888	2.56182	0.0104125	0.021264
TMEM40	2.10406	4.60753	1.75258	2.629	0.00856369	0.0178162
PCK1	2.10406	4.60753	1.75258	2.629	0.00856369	0.0178162
SH2D4B	2.10406	4.60753	1.75258	2.629	0.00856369	0.0178162
EPPIN	2.10245	4.6055	3.50131	1.31537	0.188387	0.273123
PCP4	2736.69	4.60209	0.0753909	61.0431	0	0
NPY4R2	2.09342	4.60142	1.80578	2.54816	0.0108294	0.0220253
MPPED1	2.09181	4.60057	1.7808	2.58343	0.00978219	0.0201182
BTN1A1	2.08117	4.59386	1.90392	2.41284	0.0158288	0.0311185
TEKT2	4.22187	4.59378	1.48712	3.08904	0.00200802	0.00467806
CCDC42	2.07956	4.59324	1.83995	2.49639	0.0125463	0.0251556
PRSS8	2.0784	4.5922	1.90664	2.40852	0.0160172	0.0314481
EPB41L3	246.771	4.5905	0.219299	20.9327	2.70041e-97	8.39753e-96
PENK	23.5763	4.59009	0.711637	6.45005	1.11813e-10	5.48563e-10
CSF2RB	4.20291	4.58837	1.48727	3.0851	0.00203482	0.0047336
COL17A1	2.0673	4.58173	3.92938	1.16602	0.243606	0.337505
ERC2	7.71526	4.5774	1.22174	3.74662	0.000179233	0.000487056
CNKSR2	170.804	4.56728	0.276276	16.5316	2.17301e-61	4.33084e-60
FRZB	2594.01	4.56167	0.0781955	58.3367	0	0
TTC9	79.5109	4.54229	0.378092	12.0137	3.01083e-33	3.47474e-32
STEAP2	30.3986	4.54035	0.618065	7.34606	2.04129e-13	1.17918e-12
CACNG4	11.0005	4.51576	1.01627	4.44348	8.8516e-06	2.82855e-05
JPH4	1.97664	4.51531	3.56083	1.26805	0.20478	0.292806
LRATD2	1224.85	4.51454	0.106144	42.5323	0	0
CLIC6	14.9117	4.51405	0.882404	5.11563	3.12692e-07	1.15803e-06
RAB38	123.265	4.51214	0.309019	14.6015	2.74784e-48	4.39655e-47
ISM2	63.0906	4.5071	0.425621	10.5895	3.33415e-26	3.2143e-25
LY6G6C	7.5465	4.50651	1.2243	3.6809	0.000232414	0.000622889
MYO1D	363.079	4.5065	0.180044	25.03	2.88428e-138	1.30602e-136
MBP	133.567	4.50638	0.293104	15.3747	2.42046e-53	4.26086e-52
SNX10	33.1209	4.50183	0.589949	7.63088	2.33163e-14	1.41922e-13
RYR2	7.38187	4.49847	1.23348	3.64698	0.00026534	0.000704416
BARX2	1.94427	4.49144	1.80381	2.48998	0.0127751	0.0255758
PRKG2	1.9415	4.48973	1.79082	2.50708	0.0121733	0.0244906
FFAR1	1.93988	4.48882	1.94244	2.31092	0.0208372	0.0398973
LDLRAD1	1.93872	4.48805	1.79123	2.50557	0.0122255	0.0245832
ITIH1	1.93595	4.48636	1.80505	2.48544	0.0129391	0.0258652
CYP26A1	1.93479	4.48569	1.7968	2.4965	0.0125427	0.0251546
ACR	1.92647	4.48057	1.81464	2.46912	0.0135444	0.0269707
COL9A1	1.91976	4.47648	1.81568	2.46546	0.0136839	0.0272247
FGF13	1.91861	4.4757	1.84182	2.43004	0.0150973	0.0297919
EFNB2	1939.1	4.47298	0.0907897	49.2674	0	0
EVX2	1.90751	4.46859	1.87335	2.38535	0.0170629	0.0332805
THBD	148.498	4.46507	0.278904	16.0094	1.09945e-57	2.06262e-56
COLEC12	2739.39	4.46209	0.078932	56.5308	0	0
IQCJ-SCHIP1	120.383	4.441	0.304531	14.5831	3.59903e-48	5.73549e-47
IGSF3	187.381	4.43921	0.549468	8.07911	6.52415e-16	4.30029e-15
CTNND2	7.02992	4.42473	1.25712	3.51974	0.000431968	0.00111652
MTMR8	7.07235	4.41834	1.24248	3.55606	0.000376454	0.000979369
AMN	13.8219	4.40634	0.877252	5.0229	5.08981e-07	1.8448e-06
RAP1GAP	97.3805	4.40428	0.334556	13.1645	1.40398e-39	1.87636e-38
DES	136.021	4.40421	0.290323	15.17	5.58665e-52	9.55049e-51
CHRNA3	64.6026	4.38644	0.412087	10.6445	1.85064e-26	1.79931e-25
ANXA3	469.948	4.38557	0.160157	27.3829	4.37855e-165	2.51751e-163
TAC1	1.79628	4.37413	2.01898	2.1665	0.0302729	0.0557982
GALNT17	1.79512	4.37325	1.99904	2.18767	0.0286934	0.0531936
RNF144A	74.2326	4.36986	0.379056	11.5283	9.5054e-31	1.03427e-29
OVCH2	1.7817	4.36396	1.98869	2.19439	0.0282071	0.0523893
SDK2	135.269	4.3606	0.2862	15.2362	2.03391e-52	3.5146e-51
CHRM5	1.77338	4.3578	1.85296	2.3518	0.0186828	0.036127
MUC3A	1.76668	4.35333	1.84065	2.36511	0.0180247	0.0350154
ECRG4	1.76391	4.35149	1.84976	2.35247	0.0186494	0.0360756
SBSPON	2287.42	4.34851	0.075974	57.2368	0	0
DHRS9	1.7572	4.34704	1.84239	2.35945	0.0183019	0.0354721
OR2C1	1.7572	4.34704	1.84239	2.35945	0.0183019	0.0354721
ADCYAP1	1.75604	4.34627	1.8727	2.32086	0.0202944	0.0389231
NR4A1	73.756	4.3459	0.379599	11.4487	2.38775e-30	2.57182e-29
CRYBB3	1.75443	4.34516	1.8565	2.34052	0.0192571	0.0371387
SH3GL3	464.98	4.34514	0.156738	27.7223	3.76386e-169	2.2282e-167
IZUMO1	1.74888	4.34106	2.00995	2.15978	0.0307894	0.0566121
FAM71F1	1.74772	4.34068	1.85777	2.3365	0.0194651	0.037481
PDE2A	1.74101	4.33606	1.88596	2.29912	0.0214979	0.0410197
GFRA3	53.2263	4.33511	0.88771	4.88348	1.04232e-06	3.66405e-06
FILIP1	69.6916	4.33011	0.389834	11.1076	1.15256e-28	1.20251e-27
GUCA1A	1.73154	4.32892	2.00388	2.16027	0.0307519	0.0565607
PRRX2	32.6221	4.32783	0.56669	7.63704	2.22274e-14	1.35553e-13
ELN	1.72599	4.3248	2.03593	2.12424	0.03365	0.0612948
CLPSL2	1.72599	4.3248	2.03593	2.12424	0.03365	0.0612948
TTPA	3.53369	4.32468	1.54776	2.79416	0.0052034	0.0113112
OR51E2	32.8777	4.32194	0.55952	7.72437	1.12411e-14	6.96698e-14
MTUS2	6.68306	4.31924	1.24919	3.45764	0.00054492	0.00138496
ADAMTS17	13.221	4.31687	0.920378	4.69033	2.72771e-06	9.21381e-06
FOXN1	3.50525	4.31485	1.53329	2.8141	0.00489133	0.0106778
CNTNAP3	3.46496	4.30502	1.58366	2.7184	0.00655987	0.0139692
UNC5A	90.1512	4.30048	0.351304	12.2415	1.86581e-34	2.22229e-33
NUDT10	76.5592	4.29124	0.377134	11.3786	5.34778e-30	5.71765e-29
RBP3	9.62195	4.27717	1.02603	4.16864	3.06423e-05	9.23254e-05
WNT11	19.0244	4.27469	0.725028	5.89591	3.72632e-09	1.62914e-08
NKAIN3	126.717	4.2672	0.281673	15.1495	7.6351e-52	1.29829e-50
PRSS35	720.872	4.26407	0.126152	33.8011	1.90239e-250	1.94922e-248
CAMK2A	204.673	4.25524	0.229386	18.5505	8.07324e-77	1.99448e-75
WIPF3	12.5998	4.24433	0.894911	4.74274	2.10846e-06	7.17818e-06
AKR1B15	43.5787	4.2432	0.480379	8.83303	1.0188e-18	7.59181e-18
GRID2IP	6.0526	4.2325	1.29421	3.27034	0.00107419	0.00261219
BTNL9	3.29685	4.22961	1.5746	2.68616	0.00722794	0.0152658
ZFR2	12.024	4.2203	0.917103	4.60177	4.18908e-06	1.38687e-05
EDN2	1.60805	4.21485	1.95071	2.16067	0.0307206	0.0565191
WNT2	4668.21	4.21284	0.058743	71.7164	0	0
NOG	12.2648	4.21076	0.897816	4.69001	2.73196e-06	9.2262e-06
HAPLN1	9.07396	4.20786	1.03548	4.06368	4.8304e-05	0.000141512
XPNPEP2	1.59463	4.20475	1.90526	2.20692	0.0273197	0.0509126
TMEM45B	1.59463	4.20475	1.90526	2.20692	0.0273197	0.0509126
MYOM2	1.59186	4.20269	1.9059	2.2051	0.027447	0.051126
TDRD10	1.59186	4.20269	1.9059	2.2051	0.027447	0.051126
KCTD14	1.58793	4.19982	1.90681	2.20254	0.0276273	0.0514081
TMPRSS15	1.58677	4.19908	2.08171	2.01713	0.0436815	0.0775611
ADAM2	1.58516	4.19776	1.89872	2.21084	0.0270472	0.0504697
GABRG3	26.9556	4.19627	0.611021	6.86765	6.52694e-12	3.4511e-11
SPSB4	1.58122	4.19486	1.922	2.18255	0.0290686	0.0537894
NFASC	57.149	4.19335	0.424974	9.86731	5.76894e-23	5.0033e-22
LPAR4	1.57845	4.1928	1.90903	2.19631	0.02807	0.052165
FGF5	1.57568	4.19073	1.90968	2.19447	0.0282016	0.0523874
KREMEN2	5.96315	4.18967	1.27149	3.29509	0.000983903	0.00240323
APOH	1.5729	4.18861	1.92397	2.17707	0.0294756	0.0544669
TRPV6	1.57174	4.18773	1.94319	2.15508	0.0311559	0.0572278
FOXJ1	1.57013	4.1864	1.95987	2.13607	0.032674	0.059728
HPGDS	1.56897	4.18565	1.93899	2.15868	0.0308752	0.0567513
TMEM30B	1.56781	4.1843	2.08735	2.0046	0.0450059	0.0796208
BTBD11	325.951	4.18138	0.178956	23.3654	9.62116e-121	3.70565e-119
BIRC3	65.1431	4.18021	0.393359	10.6269	2.2332e-26	2.16467e-25
ZNF385D	1.56226	4.18003	2.06204	2.02713	0.0426492	0.0759475
UTS2R	1.56226	4.18003	2.06204	2.02713	0.0426492	0.0759475
APBB1IP	12.0266	4.17664	0.951943	4.38749	1.14666e-05	3.61432e-05
GC	1.55672	4.17562	2.07183	2.01543	0.0438599	0.077826
UGT8	3.19908	4.1728	1.63589	2.55079	0.010748	0.0218736
ZNF367	94.3194	4.16857	0.324467	12.8474	8.89279e-38	1.13532e-36
SGCA	3.18405	4.16654	1.59337	2.61492	0.00892493	0.0185003
GLYATL1	3.18405	4.16654	1.59337	2.61492	0.00892493	0.0185003
FAM111B	159.218	4.16297	0.252461	16.4896	4.36024e-61	8.62128e-60
STK32B	17.7849	4.16226	0.74426	5.59248	2.2385e-08	9.21457e-08
TLL1	268.496	4.15846	0.194972	21.3285	6.16949e-101	1.99218e-99
SV2B	3.15711	4.1505	1.6277	2.54992	0.0107748	0.0219226
SHE	3.1248	4.14837	1.59619	2.59891	0.00935196	0.0192905
CAPN9	3.1355	4.14779	1.57079	2.64058	0.00827639	0.0172589
N4BP3	14.4279	4.14637	0.815918	5.08184	3.73793e-07	1.37508e-06
C9	3.11925	4.14624	1.58279	2.61957	0.00880403	0.0182734
FAXC	28.6556	4.13531	0.586629	7.04927	1.79856e-12	9.85204e-12
BNC1	937.414	4.13391	0.106682	38.7497	0	0
RIMS1	31.3358	4.12399	0.560431	7.35859	1.85857e-13	1.07714e-12
C3	141.442	4.1207	0.266159	15.4821	4.585e-54	8.17019e-53
ERVMER34-1	5.70747	4.11214	1.33154	3.08827	0.00201328	0.00468827
PHYHIP	14.1313	4.10741	0.813639	5.0482	4.46e-07	1.62834e-06
OLR1	298.776	4.10264	0.180837	22.6869	6.02785e-114	2.19975e-112
MAPK4	8.58187	4.09161	1.04146	3.92872	8.53983e-05	0.00024284
S100A10	6474.52	4.08921	0.0526372	77.6866	0	0
RGS4	181.694	4.08399	0.23279	17.5437	6.64832e-69	1.49461e-67
MARK1	61.6876	4.08211	0.388292	10.513	7.52703e-26	7.16143e-25
SPDYE16	2.99854	4.08137	1.64622	2.47923	0.0131666	0.0262805
PRR29	5.59444	4.07815	1.27791	3.19125	0.00141657	0.00338301
SFTPD	67.0062	4.07784	0.372704	10.9412	7.31986e-28	7.41258e-27
TMEM125	2.96894	4.06897	1.62043	2.51105	0.0120373	0.0242476
NRAP	1.45219	4.06629	2.33228	1.74348	0.0812498	0.133872
HRH2	2.97674	4.06115	1.60762	2.52618	0.0115309	0.0233187
GSDMA	1.44548	4.0595	2.1748	1.86661	0.0619557	0.105385
FSTL5	1.44548	4.0595	2.1748	1.86661	0.0619557	0.105385
IL10RA	2.95836	4.05943	1.64256	2.4714	0.0134585	0.0268197
DPEP1	2.95398	4.05774	1.5979	2.53942	0.0111038	0.0225318
PTPRD	944.853	4.05482	0.112874	35.9234	1.3161e-282	1.55826e-280
NOS2	2.95062	4.05003	1.64214	2.46631	0.0136515	0.0271636
TMEM229A	1.4293	4.04479	2.00937	2.01297	0.0441183	0.0781977
KHDRBS2	1.42652	4.04246	2.01019	2.01099	0.044327	0.0785318
FAM240C	1.42375	4.04053	2.12732	1.89936	0.0575176	0.0987393
ARSI	808.817	4.03857	0.120786	33.4358	4.13966e-245	4.16153e-243
C1orf100	1.41982	4.03678	1.97943	2.03937	0.0414131	0.0739772
WNT7B	1.41704	4.03451	1.99976	2.01749	0.0436439	0.077503
RIPK4	1.41588	4.03359	2.00012	2.01668	0.0437289	0.0776281
SIGLEC9	1.41311	4.03122	1.97263	2.04358	0.0409952	0.0733044
GPR21	1.41311	4.03122	1.97263	2.04358	0.0409952	0.0733044
MUC2	1.41311	4.03122	1.97263	2.04358	0.0409952	0.0733044
GP5	1.41195	4.03044	2.14833	1.87609	0.0606435	0.103428
CATSPERB	1.41034	4.02891	1.97345	2.04156	0.0411953	0.073621
SLC35F3	1.41034	4.02891	1.97345	2.04156	0.0411953	0.073621
OR2T33	1.40918	4.028	2.01542	1.99859	0.0456525	0.0806041
ERVFRD-1	1.40918	4.028	2.01542	1.99859	0.0456525	0.0806041
EML5	1.40756	4.02658	2.00262	2.01066	0.0443619	0.0785684
DSCAML1	1.40756	4.02658	2.00262	2.01066	0.0443619	0.0785684
LY6H	7.98656	4.02646	1.06614	3.77668	0.000158933	0.000434923
GRIN2B	1.39809	4.01858	2.01882	1.99056	0.0465296	0.0819175
UPB1	1.39693	4.01768	2.00588	2.00295	0.0451823	0.0799064
PLG	1.39531	4.01583	2.15448	1.86395	0.062329	0.105907
KRTAP5-1	1.39531	4.01583	2.15448	1.86395	0.062329	0.105907
HP	1.39138	4.01291	2.02091	1.9857	0.0470671	0.0827362
ERBB3	29.4085	4.01014	0.5633	7.11901	1.08708e-12	6.02913e-12
TERT	1.38745	4.00906	2.13574	1.87713	0.0605006	0.103228
ASIC2	1.38467	4.00659	2.14172	1.87073	0.0613821	0.104487
CHRNB4	1.38467	4.00659	2.14172	1.87073	0.0613821	0.104487
GKN2	1.3819	4.00405	2.15954	1.85412	0.0637223	0.107987
SBK2	1.37913	4.00137	2.19939	1.81931	0.068864	0.115695
EXPH5	42.2117	3.99837	0.473196	8.44972	2.92005e-17	2.05612e-16
EFHD1	44.7213	3.99714	0.464558	8.60417	7.68694e-18	5.54208e-17
CCDC152	2.84945	3.99595	1.68739	2.36812	0.0178786	0.0347611
PTPRN2	18.3222	3.99159	0.701669	5.68871	1.28001e-08	5.35175e-08
MEGF6	438.657	3.99155	0.148786	26.8274	1.54741e-158	8.38433e-157
STAC	2.82101	3.98287	1.6235	2.45326	0.0141569	0.0280471
ALDH1L1	13.3334	3.97577	0.831737	4.78007	1.75231e-06	6.01695e-06
NEK5	515.464	3.97298	0.147776	26.8851	3.27691e-159	1.78765e-157
MAP3K21	104.793	3.97034	0.303086	13.0997	3.3057e-39	4.38129e-38
GRB7	2.75737	3.96038	1.63879	2.41666	0.0156638	0.0308224
TMEM74	33.5832	3.96034	0.520924	7.60253	2.90406e-14	1.75961e-13
UNC80	5.06334	3.96019	1.33147	2.97429	0.00293665	0.00665148
[truncated: 14,856 more rows]

## Sheet: sum_volcano-NC
gene	baseMean	logFC	lfcSE	stat	pvalue	padj
[truncated: 15,727 more rows]

[truncated: 1 more sheets: sum_volcano-PM]
