# Supplementary material for: A hiPSC-derived lineage-specific vascular smooth muscle cell-on-a-chip identifies aortic heterogeneity across segments
Source: Royal Society of Chemistry journal article supplement (doi:10.1039/d2lc01158a), 2023-01-01
Supplement: d2lc01158a5.xlsx [file d2lc01158a5.xlsx]

## Sheet: S_PM vs S_LM_up
gene	baseMean	log2FoldChange	lfcSE	stat	pvalue	padj
DDX3Y	1017.13	13.3773	1.18002	11.3366	8.65e-30	1.46e-28
USP9Y	575.997	12.5571	1.18088	10.6337	2.08e-26	3.1e-25
NLGN4Y	515.481	12.3969	1.18133	10.4941	9.2e-26	1.33e-24
KDM5D	386.495	11.9814	1.18192	10.1372	3.78e-24	5.13e-23
UTY	224.187	11.1954	1.18461	9.45068	3.37e-21	4.06e-20
RPS4Y1	222.675	11.1851	1.18596	9.43128	4.05e-21	4.86e-20
ZFY	182.011	10.8948	1.18577	9.188	4e-20	4.59e-19
ZNF354C	77.1981	9.65739	1.19567	8.07701	6.64e-16	6.12e-15
ZNF248	264.57	9.57551	1.02663	9.32711	1.09e-20	1.28e-19
POTEF	60.3774	9.30401	1.20411	7.7269	1.1e-14	9.51e-14
ZNF680	60.1682	9.29798	1.20036	7.74602	9.48e-15	8.21e-14
EIF1AY	177.618	8.99908	1.03213	8.71895	2.81e-18	2.95e-17
MTLN	42.4957	8.79567	1.21263	7.25336	4.07e-13	3.21e-12
DAPP1	160.089	8.26323	0.845496	9.77323	1.47e-22	1.87e-21
CYP4X1	26.1111	8.09449	1.23026	6.57947	4.72e-11	3.25e-10
CYP2A6	24.4048	7.99663	1.23203	6.49063	8.55e-11	5.76e-10
PLN	150.032	7.75277	0.736373	10.5283	6.4e-26	9.34e-25
ZNF560	17.8519	7.54402	1.25715	6.00089	1.96e-09	1.18e-08
LCN9	14.7501	7.26999	1.26776	5.7345	9.78e-09	5.52e-08
ERMN	27.5859	7.20235	1.22541	5.8775	4.17e-09	2.43e-08
PIK3AP1	13.3434	7.12494	1.27471	5.58945	2.28e-08	1.24e-07
TMEM132D	12.7961	7.066	1.28156	5.51361	3.52e-08	1.88e-07
DNAJC15	592.436	6.92088	0.284415	24.3338	8.62e-131	7.93e-129
DCX	10.5629	6.7898	1.3062	5.19812	2.01e-07	9.97e-07
TLR4	20.011	6.73559	1.24452	5.41218	6.23e-08	3.25e-07
C16orf90	10.0274	6.71227	1.3087	5.12896	2.91e-07	1.42e-06
ZNF37A	248.776	6.66731	0.404468	16.4842	4.77e-61	1.72e-59
SLC5A7	9.53353	6.63983	1.30858	5.07407	3.89e-07	1.87e-06
HLA-DQB1	18.2825	6.60383	1.24686	5.29638	1.18e-07	5.96e-07
PUS7L	434.876	6.57935	0.2982	22.0635	7.08e-108	4.79e-106
C4orf54	8.2887	6.43718	1.34032	4.80272	1.57e-06	7.01e-06
H3-2	8.09322	6.4039	1.33131	4.81021	1.51e-06	6.77e-06
MS4A6A	7.45834	6.28604	1.34325	4.67973	2.87e-06	1.25e-05
SULT1E1	7.13947	6.22307	1.35086	4.60673	4.09e-06	1.75e-05
ANKRD1	533.86	6.21223	0.242879	25.5775	2.72e-144	2.8e-142
CMKLR1	7.06846	6.20556	1.37989	4.49713	6.89e-06	2.86e-05
IRAG1	103.45	6.20356	0.540927	11.4684	1.9e-30	3.27e-29
SDR42E1	23.4757	6.0608	1.08338	5.59436	2.21e-08	1.21e-07
MLIP	67.8221	6.00636	0.628888	9.55077	1.29e-21	1.58e-20
IRAK4	223.478	5.98876	0.346053	17.3059	4.24e-67	1.71e-65
PALMD	33.3678	5.9779	0.897101	6.66357	2.67e-11	1.89e-10
KLF8	54.6259	5.95441	0.690468	8.62373	6.48e-18	6.68e-17
ZNF585B	74.9042	5.92432	0.58441	10.1373	3.77e-24	5.13e-23
KCNMB1	5.52702	5.8549	1.41411	4.14034	3.47e-05	0.000129364
LAMA4	972.407	5.84774	0.263178	22.2197	2.22e-109	1.54e-107
TMPRSS11E	5.40934	5.8219	1.40729	4.13695	3.52e-05	0.000131167
ESRRG	10.6437	5.81411	1.30123	4.46818	7.89e-06	3.25e-05
CLDN6	68.9969	5.80316	0.588715	9.85733	6.37e-23	8.28e-22
OPN1SW	10.5598	5.79959	1.30234	4.45319	8.46e-06	3.46e-05
AADAC	5.26896	5.78306	1.42426	4.0604	4.9e-05	0.000178525
TBL1Y	5.24054	5.77666	1.41752	4.0752	4.6e-05	0.000168342
POTEE	18.4024	5.70313	1.10785	5.14791	2.63e-07	1.29e-06
SORCS3	9.82613	5.69725	1.30827	4.35481	1.33e-05	5.28e-05
KCNH1	4.92675	5.6874	1.4214	4.00126	6.3e-05	0.000225369
LGSN	4.92278	5.68646	1.42138	4.00065	6.32e-05	0.0002258
NOS1	4.91596	5.68485	1.42218	3.99726	6.41e-05	0.000228853
LEFTY2	4.77954	5.64296	1.42951	3.94747	7.9e-05	0.000278616
ANKRD18A	4.61583	5.59298	1.44479	3.87114	0.000108325	0.000372022
HLA-DRB1	16.9274	5.57604	1.10803	5.03237	4.84e-07	2.31e-06
BMPER	74.7915	5.55529	0.526429	10.5528	4.93e-26	7.24e-25
C4orf50	8.90642	5.55107	1.31602	4.21808	2.46e-05	9.4e-05
SULT1B1	4.3322	5.49948	1.47861	3.71935	0.000199734	0.000656537
TCIM	23.8893	5.49179	0.911168	6.02719	1.67e-09	1.01e-08
CLEC1B	4.2941	5.489	1.48072	3.70698	0.000209742	0.000686909
SLCO5A1	4.24646	5.47545	1.50845	3.62986	0.000283578	0.00091057
NR5A2	8.3195	5.45024	1.3299	4.09825	4.16e-05	0.000153334
DMRT2	8.27805	5.44428	1.33066	4.09143	4.29e-05	0.000157413
MGMT	92.3142	5.43858	0.457675	11.8831	1.45e-32	2.62e-31
MS4A4E	4.14466	5.43717	1.46524	3.71079	0.000206617	0.000677224
SUSD4	4.01905	5.39066	1.49338	3.6097	0.000306553	0.000978683
MYL1	3.93268	5.36496	1.49418	3.59056	0.000329965	0.00104821
HRNR	3.92299	5.36194	1.50998	3.55101	0.000383755	0.00120744
FOXL2NB	7.82103	5.35986	1.33457	4.01616	5.92e-05	0.000212821
CLDN1	121.674	5.332	0.387033	13.7766	3.52e-43	8.82e-42
CLEC2A	3.62063	5.24552	1.51643	3.45912	0.000541935	0.00166162
STK32A	20.0805	5.23322	0.92248	5.67299	1.4e-08	7.8e-08
PWP2	59.9309	5.2273	0.545479	9.58295	9.43e-22	1.16e-20
CA4	3.49899	5.19348	1.5128	3.43302	0.000596905	0.0018177
TRIM9	39.0219	5.19346	0.654209	7.93853	2.05e-15	1.84e-14
MMP9	6.95971	5.18868	1.36266	3.80775	0.000140238	0.000472647
AL117339.4	3.4558	5.17882	1.53655	3.37042	0.000750548	0.00224398
INHBA	109.355	5.1773	0.394789	13.1141	2.73e-39	6.1e-38
GATD3A	88.9327	5.15765	0.429121	12.0191	2.82e-33	5.26e-32
SLC9A4	3.36543	5.13542	1.5542	3.30421	0.000952433	0.00278795
DHRS9	62.4842	5.13316	0.507921	10.1062	5.18e-24	7e-23
ALX4	12.5019	5.13271	1.13959	4.50401	6.67e-06	2.78e-05
UGT2B7	3.35289	5.13093	1.53015	3.35321	0.000798803	0.00237239
IL4I1	3.33415	5.12434	1.52666	3.35656	0.000789178	0.00234814
ACTBL2	60.2071	5.07755	0.509196	9.97171	2.03e-23	2.69e-22
KCNJ2	6.44644	5.07014	1.3894	3.64916	0.000263099	0.000849557
CNTN1	304.603	5.06504	0.229631	22.0573	8.13e-108	5.48e-106
NOX4	70.5779	5.04444	0.469086	10.7538	5.69e-27	8.73e-26
CD36	46.9233	5.03905	0.570877	8.82685	1.08e-18	1.16e-17
MSC	58.5573	5.03866	0.52066	9.67744	3.76e-22	4.71e-21
NPBWR1	6.22906	5.0234	1.42232	3.53183	0.000412687	0.00128965
PXMP4	63.3809	5.01301	0.488245	10.2674	9.88e-25	1.38e-23
ATP12A	205.147	4.99542	0.272067	18.361	2.7e-75	1.22e-73
CACNA1E	3.04879	4.99267	1.59672	3.12683	0.00176705	0.00489243
TSPAN8	3.04656	4.99164	1.58278	3.15371	0.00161209	0.00451072
KLHL4	191.977	4.98133	0.280562	17.7548	1.58e-70	6.74e-69
MTTP	6.04709	4.98035	1.37675	3.61746	0.000297508	0.000952261
MMP10	6.05263	4.97963	1.39416	3.57178	0.000354557	0.00112149
LGR5	49.3038	4.93987	0.547528	9.02213	1.84e-19	2.06e-18
PAX9	2.87427	4.90899	1.66035	2.9566	0.00311047	0.00817341
PCDH11Y	2.87205	4.90775	1.57777	3.11056	0.00186735	0.00514449
RASSF2	5.60943	4.86671	1.39987	3.47655	0.000507903	0.00156472
GYPE	5.55067	4.85218	1.39996	3.46593	0.000528391	0.0016238
LYPD1	10.3013	4.84564	1.15912	4.18047	2.91e-05	0.000109612
CAT	128.476	4.84001	0.330935	14.6253	1.94e-48	5.36e-47
VGF	20.43	4.82936	0.820575	5.88534	3.97e-09	2.32e-08
DLX5	2.71118	4.82476	1.6024	3.01095	0.00260429	0.00696727
TMPRSS11B	2.6953	4.81781	1.6148	2.98353	0.00284943	0.00754785
LMO1	2.68959	4.8154	1.60349	3.00307	0.00267272	0.00713139
IL7R	60.3172	4.8085	0.475537	10.1117	4.9e-24	6.63e-23
CDKN2B	1207.26	4.77347	0.11261	42.3894	0	0
IL1RL1	14.7383	4.77143	0.95546	4.99385	5.92e-07	2.79e-06
DCLK1	53.4276	4.75785	0.498426	9.54575	1.35e-21	1.65e-20
EREG	2.55032	4.73671	1.63706	2.89343	0.00381062	0.00985082
GNAT3	2.53778	4.73088	1.7403	2.71843	0.00655918	0.0161398
KRT7	57.0097	4.72288	0.481006	9.81875	9.35e-23	1.2e-21
NEFL	1053.55	4.64755	0.359755	12.9187	3.53e-38	7.65e-37
FZD10	2.39803	4.64701	1.65725	2.80404	0.0050466	0.0127132
PI16	2.39406	4.64508	1.67301	2.77649	0.0054949	0.0137394
CD14	8.92548	4.63536	1.18049	3.92663	8.61e-05	0.000301241
SYT3	8.94778	4.63062	1.17359	3.94569	7.96e-05	0.000280451
PDCD1LG2	17.8619	4.63013	0.832258	5.56334	2.65e-08	1.43e-07
CNTNAP3B	26.72	4.62617	0.691263	6.69234	2.2e-11	1.56e-10
WNT5A	315.961	4.62564	0.201552	22.9502	1.47e-116	1.12e-114
UNC13C	2.34119	4.6184	1.71691	2.68994	0.00714639	0.0174091
CNR1	26.3064	4.60891	0.693428	6.64655	3e-11	2.11e-10
OXCT1	456.569	4.60631	0.173581	26.537	3.63e-155	4.05e-153
MYOCD	190.947	4.58835	0.260765	17.5957	2.66e-69	1.12e-67
NEK11	42.5308	4.57608	1.11163	4.11657	3.85e-05	0.000142527
NMU	4.59073	4.56886	1.448	3.15528	0.00160344	0.00448885
MS4A7	2.26273	4.56081	1.73227	2.63286	0.00846699	0.0203097
PCDH15	2.25193	4.55483	1.69842	2.6818	0.00732276	0.0178037
HTRA4	2.2224	4.53917	1.68307	2.69696	0.0069975	0.0170982
GCSAML	2.21954	4.5377	1.67521	2.70874	0.006754	0.0165559
STUM	2.21446	4.53483	1.73699	2.61074	0.00903453	0.0215172
KLHL30	4.47496	4.53015	1.4406	3.14464	0.00166294	0.00463688
PPFIA2	2.20192	4.5283	1.70084	2.66239	0.00775889	0.0187508
IGF1	8.29171	4.52491	1.19114	3.7988	0.0001454	0.000488308
HAPLN3	784.347	4.52182	0.127826	35.3748	4.17e-274	1.05e-271
SOWAHB	2.17524	4.51307	1.7848	2.52862	0.0114513	0.026516
PKHD1	4.41019	4.5125	1.46171	3.08713	0.00202099	0.00553554
APLNR	685.794	4.4875	0.138267	32.4553	4.56e-231	9.66e-229
C16orf54	4.3514	4.4833	1.45838	3.07417	0.00211086	0.0057621
OR1F1	2.08995	4.44719	1.7231	2.58092	0.00985382	0.0232075
PAK3	27.8909	4.44208	0.977246	4.54551	5.48e-06	2.31e-05
GPR45	2.06836	4.43492	1.71192	2.59061	0.0095807	0.0226371
TTBK1	2.06551	4.43334	1.70737	2.59659	0.00941537	0.022289
SLC27A2	2.06154	4.43108	1.7078	2.59461	0.00946969	0.0224011
TMSB4Y	2.05074	4.42492	1.71711	2.57696	0.00996734	0.023444
CCKBR	11.619	4.42364	0.994306	4.44897	8.63e-06	3.52e-05
PLCXD3	2.0428	4.42019	1.74818	2.52845	0.0114566	0.0265207
MS4A12	2.03709	4.41685	1.76403	2.50384	0.0122855	0.0282607
BHLHE22	2.03597	4.41625	1.74899	2.52502	0.011569	0.0267617
TENM1	112.055	4.41362	0.316213	13.9577	2.82e-44	7.21e-43
NIPAL4	129.615	4.39277	0.2944	14.9211	2.4e-50	6.99e-49
DUOX2	56.4621	4.37724	0.444089	9.85667	6.41e-23	8.32e-22
ZNF229	48.7734	4.36885	0.480102	9.09982	9.05e-20	1.02e-18
C1QL2	3.9876	4.3549	1.47684	2.94879	0.00319016	0.00835827
MFSD6L	1.94957	4.3448	1.82546	2.38012	0.0173072	0.0383704
SHISA9	11.071	4.3435	0.997203	4.35568	1.33e-05	5.26e-05
ZDHHC22	7.41145	4.33853	1.22555	3.54007	0.000400022	0.00125289
EPHA5	10.9728	4.33307	1.00288	4.32064	1.56e-05	6.12e-05
SLC2A14	1.92227	4.3275	1.75906	2.46012	0.0138892	0.0315619
NOMO3	221.73	4.31999	0.222583	19.4085	6.55e-84	3.27e-82
AOC1	1.89956	4.31345	1.76534	2.4434	0.0145495	0.0328957
H4C11	1.88988	4.30751	1.76347	2.44264	0.0145804	0.0329512
FAM95C	1.88591	4.30501	1.76724	2.436	0.0148507	0.0335009
ODAPH	3.85636	4.3042	1.50561	2.85878	0.00425271	0.0108732
ADRA1A	1.88194	4.30245	1.77812	2.41967	0.0155348	0.034857
GYPA	1.87908	4.30057	1.79827	2.39151	0.0167794	0.0373082
SYNDIG1	17.9667	4.29868	0.775767	5.5412	3e-08	1.62e-07
PCDHA6	85.565	4.29456	0.353594	12.1455	6.06e-34	1.15e-32
IAH1	163.899	4.28882	0.259035	16.557	1.43e-61	5.21e-60
SCG2	142.309	4.288	0.277813	15.4349	9.54e-54	2.98e-52
CTNND2	134.307	4.27681	0.288234	14.838	8.32e-50	2.38e-48
IGFL2	24.7339	4.27521	0.655707	6.52	7.03e-11	4.78e-10
DUOXA2	7.01583	4.26395	1.20962	3.52503	0.000423437	0.00131966
MYLK	1219.42	4.25634	0.102126	41.6775	0	0
PADI2	65.4213	4.23948	0.400049	10.5974	3.06e-26	4.54e-25
ZNF280D	116.867	4.23769	0.305152	13.8871	7.58e-44	1.92e-42
TRDN	3.67725	4.23386	1.52315	2.77967	0.00544146	0.0136185
AC097625.1	1.78188	4.21548	1.83935	2.29184	0.0219151	0.0474749
SPP1	40.7196	4.21417	0.833328	5.05704	4.26e-07	2.04e-06
ASB2	1.77506	4.21083	1.83042	2.30047	0.0214214	0.0465117
ADGRG4	1.76315	4.20273	1.83243	2.29353	0.0218177	0.0472892
AFP	6.77879	4.20203	1.24651	3.37103	0.000748878	0.00223988
CA3	116.634	4.18912	0.318002	13.1733	1.25e-39	2.82e-38
SYTL2	536.252	4.17872	0.139809	29.8888	2.75e-196	4.3e-194
INA	361.975	4.1701	0.168379	24.7661	2.08e-135	2e-133
TM6SF2	3.53121	4.16902	1.5027	2.77435	0.00553129	0.0138153
TACSTD2	36.328	4.16844	0.533323	7.81597	5.45e-15	4.79e-14
C10orf67	3.49962	4.16118	1.50484	2.7652	0.00568874	0.0141846
PRPH2	62.0235	4.16014	0.404785	10.2774	8.91e-25	1.24e-23
COL8A1	201.434	4.12613	0.221835	18.6	3.22e-77	1.49e-75
ALOX5AP	15.9024	4.12523	0.795624	5.1849	2.16e-07	1.07e-06
C3orf80	3.39274	4.10968	1.53949	2.6695	0.00759633	0.0183939
ACTG2	5708.52	4.10587	0.0635648	64.5935	0	0
GUCY1A1	506.182	4.10044	0.145601	28.1621	1.7e-174	2.28e-172
GLRA3	3.33684	4.08608	1.5184	2.69104	0.00712293	0.0173625
SYTL5	429.486	4.07951	0.288241	14.1531	1.79e-45	4.67e-44
GPX3	141.954	4.07399	0.268023	15.2001	3.53e-52	1.07e-50
DIRAS2	105.091	4.07296	0.306461	13.2903	2.64e-40	6.1e-39
CARD6	15.324	4.06104	0.791238	5.13252	2.86e-07	1.39e-06
SLCO2A1	11.8294	4.01415	0.90075	4.45646	8.33e-06	3.42e-05
SDS	3.1709	4.00883	1.55718	2.57441	0.0100411	0.0235865
GPR34	3.13471	3.99776	1.59891	2.50031	0.0124086	0.0285235
TNC	23406.7	3.997	0.0424429	94.1735	0	0
PZP	8.7919	3.9821	1.03011	3.8657	0.000110769	0.000379939
SPOCD1	367.867	3.9744	0.1616	24.594	1.46e-133	1.39e-131
IRF8	144.12	3.96658	0.25846	15.347	3.71e-53	1.15e-51
ATP13A4	8.57177	3.96146	1.02988	3.84653	0.000119805	0.000409524
TACR3	3.06482	3.95567	1.61201	2.45388	0.0141324	0.0320648
EPHA3	1100.16	3.95426	0.100198	39.4645	0	0
NTNG1	70.8662	3.94104	0.355924	11.0727	1.7e-28	2.76e-27
MYL7	969.388	3.93338	0.118116	33.3011	3.72e-243	8.33e-241
FOLH1	8.43653	3.93206	1.0303	3.81644	0.00013539	0.000457649
SCN9A	8.42216	3.92796	1.05663	3.71746	0.000201235	0.000661201
CCL7	11.0926	3.91724	0.924152	4.23874	2.25e-05	8.64e-05
KIF1A	98.9392	3.89447	0.301482	12.9178	3.57e-38	7.73e-37
CDKN2A	195.389	3.87474	0.22077	17.551	5.84e-69	2.44e-67
LCNL1	2.90507	3.87328	1.57948	2.45225	0.0141965	0.0321966
PLCH1	2.90601	3.86987	1.57891	2.45098	0.0142469	0.0322927
ADRA1D	2.87816	3.86067	1.57382	2.45305	0.0141652	0.0321301
KCNS2	2.86189	3.85491	1.5626	2.46699	0.0136255	0.0310196
SOD3	371.629	3.85276	0.157272	24.4974	1.57e-132	1.48e-130
ASTE1	63.9251	3.85009	0.373002	10.3219	5.61e-25	7.91e-24
TNIP3	2.856	3.84855	1.57661	2.44103	0.0146455	0.0330844
POSTN	1997.46	3.84164	0.0818649	46.9267	0	0
PCDH11X	5.23079	3.8253	1.28317	2.98113	0.00287183	0.00759592
FGF9	10.4182	3.81925	0.929988	4.10678	4.01e-05	0.000148122
A2M	547.304	3.79629	0.130971	28.9857	9.95e-185	1.38e-182
CHL1	15.4491	3.79557	0.742349	5.11291	3.17e-07	1.53e-06
WDR72	17.8217	3.7775	0.687297	5.49617	3.88e-08	2.07e-07
IL1A	2.72373	3.77669	1.61331	2.34096	0.019234	0.0421488
ADGRG6	668.834	3.77367	0.116763	32.3192	3.77e-229	7.77e-227
PRSS23	1853.78	3.76597	0.080072	47.0323	0	0
H4C5	2.69285	3.76144	1.59218	2.36244	0.0181551	0.0400408
THBS2	152.657	3.75178	0.241182	15.5558	1.45e-54	4.64e-53
ESRP1	20.08	3.75031	0.663238	5.65455	1.56e-08	8.64e-08
PIEZO2	82.1858	3.74306	0.323935	11.555	6.97e-31	1.21e-29
TMEM178B	9.99234	3.74094	0.920935	4.06211	4.86e-05	0.000177342
NOX5	94.3706	3.73684	0.297326	12.5682	3.16e-36	6.5e-35
SCN3A	4.92803	3.73554	1.29814	2.8776	0.00400709	0.0103091
MCHR1	4.90335	3.7264	1.30722	2.85063	0.00436327	0.0111201
IFNE	12.3135	3.72515	0.822032	4.53164	5.85e-06	2.46e-05
STMN2	1257.14	3.70477	0.0904066	40.9789	0	0
ACTA2	8433.54	3.70317	0.102894	35.9903	1.19e-283	3.09e-281
SLC9A2	7.17948	3.68974	1.08011	3.41607	0.000635311	0.00192337
MEST	3572.45	3.68624	0.0630065	58.5056	0	0
CDH6	301.841	3.68335	0.169794	21.6931	2.39e-104	1.56e-102
PCSK2	7.15994	3.67908	1.06425	3.45696	0.000546312	0.00167376
ISL2	4.79169	3.67718	1.31313	2.80031	0.00510542	0.0128433
CCDC81	112.71	3.6502	0.276425	13.205	8.21e-40	1.87e-38
ACTC1	334.661	3.63466	0.404655	8.98211	2.66e-19	2.95e-18
HS3ST4	64.9615	3.63203	0.350033	10.3763	3.18e-25	4.51e-24
PDE11A	20.8374	3.63152	0.62044	5.85314	4.82e-09	2.79e-08
SLC25A48	48.6946	3.63108	0.401117	9.05242	1.4e-19	1.57e-18
NTRK3	18.2668	3.60737	0.655089	5.50669	3.66e-08	1.96e-07
RCAN2	47.8638	3.60683	0.422765	8.53152	1.44e-17	1.46e-16
CALB1	6.73827	3.58297	1.09635	3.2681	0.0010827	0.00313291
NMUR2	6.70846	3.56882	1.09738	3.25213	0.00114543	0.00329547
SBK1	28.5014	3.54274	0.521892	6.78826	1.13e-11	8.2e-11
FGFBP1	6.57801	3.53492	1.07491	3.28858	0.00100695	0.0029327
OCIAD2	131.64	3.52169	0.257562	13.6732	1.47e-42	3.63e-41
WSCD2	4.3171	3.50516	1.35291	2.59083	0.0095745	0.0226288
MRC1	4.30519	3.50214	1.33879	2.6159	0.00889933	0.0212297
CFH	46.8268	3.49452	0.40791	8.56689	1.06e-17	1.08e-16
IGFBP7	720.411	3.48599	0.118704	29.3671	1.45e-189	2.12e-187
ITGB3	180.005	3.48502	0.218482	15.951	2.8e-57	9.38e-56
LAMC2	377.588	3.48266	0.145587	23.9215	1.83e-126	1.55e-124
CNTNAP3	39.7396	3.47455	0.462483	7.51282	5.79e-14	4.8e-13
XRCC4	770.42	3.42842	0.22555	15.2003	3.52e-52	1.07e-50
PCDH10	5797.01	3.4234	0.051898	65.964	0	0
SEMA3F	6.06441	3.4217	1.09299	3.13058	0.00174461	0.00483696
SYT1	40.2426	3.40779	0.433088	7.86859	3.59e-15	3.18e-14
GUCY1A2	206.279	3.39966	0.197769	17.19	3.16e-66	1.25e-64
CD6	6.01277	3.3986	1.1506	2.95376	0.00313926	0.00824099
DMRTA1	57.8787	3.39565	0.77864	4.361	1.29e-05	5.15e-05
HAPLN1	96.8769	3.38147	0.274821	12.3042	8.59e-35	1.68e-33
NOMO2	770.513	3.37458	0.104852	32.1841	2.94e-227	5.92e-225
PNMA8C	9.80621	3.37041	0.912792	3.69242	0.000222132	0.00072542
LRRC15	5.94938	3.36947	1.11669	3.01737	0.00254979	0.00683967
GRM8	47.0466	3.369	0.390916	8.61821	6.8e-18	7.01e-17
PROX1	11.6131	3.34743	0.789265	4.24121	2.22e-05	8.55e-05
KCNE4	44.6821	3.34692	0.408257	8.19808	2.44e-16	2.31e-15
TNFAIP8L3	11.5574	3.34685	0.799301	4.18722	2.82e-05	0.000106678
PCDHGA10	166.822	3.33459	0.225561	14.7836	1.87e-49	5.31e-48
RAB3C	13.419	3.32994	0.740966	4.49405	6.99e-06	2.9e-05
NAV3	300.12	3.3249	0.174181	19.0887	3.13e-81	1.53e-79
CNTNAP5	9.45936	3.32215	0.898023	3.6994	0.000216111	0.00070633
A4GNT	3.81809	3.32168	1.35588	2.44983	0.0142925	0.0323869
DPYSL3	8149.31	3.32117	0.0490311	67.7359	0	0
MRPL23	104.369	3.31831	0.27879	11.9026	1.15e-32	2.08e-31
GLIPR1	392.95	3.30959	0.137519	24.0664	5.62e-128	4.84e-126
EPPK1	202.235	3.2961	0.204284	16.1349	1.45e-58	4.99e-57
TNFSF15	74.6707	3.29112	0.311276	10.573	3.98e-26	5.87e-25
HSPB3	7.38004	3.2708	0.962181	3.39936	0.000675436	0.00203719
MXRA5	4325.6	3.27053	0.0643226	50.8457	0	0
SPRY1	38.6069	3.2686	0.435318	7.50852	5.98e-14	4.95e-13
MKX	27.553	3.26519	0.502721	6.49502	8.3e-11	5.6e-10
ST8SIA6	3.69984	3.25828	1.39347	2.33825	0.0193742	0.042433
PPARGC1A	3.67088	3.25816	1.35832	2.39866	0.0164552	0.0367079
TRPC4	142.286	3.25103	0.244199	13.313	1.94e-40	4.55e-39
FOXC1	14.5857	3.24779	0.684548	4.74443	2.09e-06	9.23e-06
SLC22A2	91.0052	3.24763	0.286154	11.3492	7.48e-30	1.27e-28
BLK	5.41213	3.24541	1.12292	2.89015	0.00385063	0.0099383
ST6GAL2	47.1406	3.24294	0.401944	8.06815	7.14e-16	6.56e-15
CYP1B1	242.611	3.24052	0.174594	18.5603	6.73e-77	3.09e-75
JPH4	20.0554	3.24029	0.610954	5.30366	1.14e-07	5.74e-07
ALPK3	522.907	3.24003	0.124672	25.9884	6.7e-149	7.29e-147
GPC5	164.388	3.23647	0.207834	15.5724	1.12e-54	3.6e-53
SLITRK6	7.22075	3.22937	0.986014	3.27518	0.00105595	0.00306375
CD274	12.5018	3.22367	0.769052	4.19174	2.77e-05	0.000104719
MFGE8	11796.4	3.22174	0.0397271	81.0968	0	0
LDHD	7.22183	3.21954	1.0011	3.21601	0.00129985	0.00370347
SERTM2	3.53773	3.21387	1.40239	2.29171	0.0219225	0.0474846
NT5C1A	12.4226	3.20837	0.741033	4.32958	1.49e-05	5.89e-05
LRRTM3	3.51614	3.20588	1.39344	2.30069	0.0214091	0.0464913
MARCHF4	78.1654	3.20567	0.308656	10.3859	2.87e-25	4.09e-24
LCP1	54.515	3.19455	0.367618	8.68985	3.63e-18	3.79e-17
PWWP3B	78.9565	3.19174	0.293261	10.8836	1.38e-27	2.17e-26
RENBP	15.7792	3.18203	0.682724	4.66079	3.15e-06	1.37e-05
TAF9B	223.485	3.18117	0.184261	17.2645	8.71e-67	3.48e-65
RHOJ	29.4442	3.16938	0.474268	6.68267	2.35e-11	1.66e-10
C11orf87	17.2205	3.16398	0.629419	5.02683	4.99e-07	2.37e-06
VWDE	18.8806	3.16388	0.629913	5.02272	5.09e-07	2.42e-06
ARHGAP40	17.2162	3.16168	0.626924	5.04316	4.58e-07	2.19e-06
ADAMTS18	157.951	3.15907	0.212465	14.8687	5.26e-50	1.52e-48
ABCC3	6.87878	3.15506	0.974007	3.23926	0.00119841	0.003435
ITGA7	89.051	3.15321	0.298248	10.5724	4e-26	5.9e-25
CXCL5	5.13476	3.15277	1.13438	2.77928	0.00544791	0.0136325
SPTA1	25.5383	3.14522	0.528289	5.9536	2.62e-09	1.56e-08
CSMD1	5.09397	3.13727	1.14402	2.74232	0.00610075	0.0151227
DYSF	44.1228	3.13682	0.387806	8.08864	6.03e-16	5.57e-15
C6orf141	77.8359	3.13538	0.294536	10.6452	1.84e-26	2.75e-25
PRDM1	15.3031	3.13427	0.664359	4.71773	2.38e-06	1.05e-05
FZD5	164.249	3.13285	0.210579	14.8773	4.63e-50	1.34e-48
ACVR1C	18.5442	3.13185	0.604633	5.17975	2.22e-07	1.09e-06
SCN2A	72.2894	3.12304	0.304861	10.2441	1.26e-24	1.74e-23
SULT1C2	26.9113	3.12242	0.495564	6.30074	2.96e-10	1.91e-09
HEPH	1613.03	3.11586	0.0757292	41.1448	0	0
SYT16	33.2799	3.10669	0.453401	6.85198	7.28e-12	5.34e-11
FGF13	18.2113	3.10326	0.605613	5.12416	2.99e-07	1.45e-06
CPA4	922.971	3.09093	0.0910287	33.9556	1.01e-252	2.35e-250
PRKCH	9.8646	3.088	0.832116	3.71102	0.000206428	0.000676883
ADGRF4	6.59801	3.0858	0.997613	3.09319	0.00198019	0.00542842
LFNG	12.9403	3.06737	0.708718	4.32805	1.5e-05	5.93e-05
HSD3B2	25.8803	3.06297	0.510849	5.99584	2.02e-09	1.22e-08
TBC1D30	4.88592	3.0628	1.20066	2.55093	0.0107436	0.0250467
DMD	2515.91	3.06139	0.0658326	46.5027	0	0
HRK	6.40987	3.05075	1.02071	2.98886	0.0028002	0.00743335
GRHL3	73.9516	3.05061	0.30707	9.93456	2.94e-23	3.86e-22
HEY1	62.2872	3.04668	0.339945	8.96226	3.18e-19	3.52e-18
SFRP1	228.168	3.03817	0.174357	17.425	5.33e-68	2.19e-66
KCNC3	128.81	3.02994	0.236305	12.8221	1.23e-37	2.62e-36
GPR183	46.0225	3.02346	0.395085	7.65268	1.97e-14	1.68e-13
GRIN2A	58.469	3.02042	0.33833	8.92743	4.36e-19	4.8e-18
FAM181B	15.792	3.0186	0.640832	4.71043	2.47e-06	1.08e-05
NEFM	470.183	3.01783	0.502493	6.00572	1.9e-09	1.15e-08
SHC3	40.6564	3.01014	0.409619	7.34865	2e-13	1.61e-12
ODAM	9.39004	3.01013	0.830033	3.62652	0.000287267	0.000921131
NOVA2	17.2299	3.00911	0.615669	4.88755	1.02e-06	4.68e-06
RAB6D	6.25698	2.99568	1.019	2.93981	0.00328416	0.00857584
ST14	4.60583	2.99169	1.20421	2.48436	0.0129785	0.0296978
MYOM2	13.9741	2.99052	0.666936	4.48396	7.33e-06	3.03e-05
CBSL	146.78	2.98939	0.223994	13.3458	1.25e-40	2.95e-39
PCDH8	4.58995	2.98794	1.25493	2.38095	0.0172679	0.0382991
CSMD3	59.9185	2.97981	0.335642	8.87795	6.81e-19	7.41e-18
MINAR2	7.68169	2.97844	0.904917	3.29139	0.000996921	0.00290663
EYA4	16.9332	2.97673	0.61517	4.83887	1.31e-06	5.91e-06
GNG2	358.155	2.97583	0.137084	21.7081	1.72e-104	1.13e-102
NPPC	7.67755	2.97176	0.909793	3.26641	0.00108919	0.00315056
PIK3R3	212.504	2.96885	0.176941	16.7787	3.49e-63	1.31e-61
CA2	6.0864	2.96716	1.02106	2.90595	0.00366138	0.00950318
CHRDL1	6.0563	2.95562	1.00941	2.92807	0.00341072	0.00888696
FST	315.687	2.9536	0.151535	19.4913	1.3e-84	6.57e-83
FSTL5	12.2509	2.95314	0.757233	3.89991	9.62e-05	0.000333609
ADGRL4	33.1355	2.94437	0.453403	6.49395	8.36e-11	5.64e-10
COL25A1	263.683	2.94326	0.165694	17.7633	1.36e-70	5.81e-69
STON2	68.4419	2.92751	0.305194	9.59228	8.62e-22	1.06e-20
POU2F2	26.7319	2.92651	0.49179	5.95072	2.67e-09	1.59e-08
ANO3	4.45798	2.92117	1.19516	2.44417	0.0145185	0.0328528
SLC22A3	3643.65	2.91426	0.0530778	54.9054	0	0
SOX9	72.1989	2.9086	0.309763	9.38977	6.01e-21	7.15e-20
PPP1R36	8.82139	2.90795	0.825452	3.52285	0.000426928	0.00133028
ABCB4	16.2112	2.90385	0.620293	4.68142	2.85e-06	1.24e-05
CCDC3	199.288	2.89952	0.178415	16.2516	2.18e-59	7.6e-58
OPRD1	27.6561	2.89788	0.54346	5.33226	9.7e-08	4.96e-07
ACKR1	33.4579	2.88885	0.434241	6.65265	2.88e-11	2.03e-10
DNAH11	46.4669	2.886	0.380865	7.57749	3.52e-14	2.96e-13
MAFB	31.9249	2.88569	0.441096	6.54209	6.07e-11	4.15e-10
GREM1	1382.52	2.88312	0.0743423	38.7817	0	0
PTPRN	233.859	2.8811	0.172863	16.667	2.28e-62	8.45e-61
CRHBP	15.8567	2.8792	0.624013	4.61401	3.95e-06	1.69e-05
HBQ1	7.20194	2.87741	0.953927	3.01639	0.00255808	0.00685732
MAMDC2	179.945	2.87167	0.189189	15.1788	4.89e-52	1.47e-50
ETV1	113.779	2.87021	0.233616	12.286	1.08e-34	2.1e-33
AMPD3	57.5692	2.86684	0.335845	8.5362	1.39e-17	1.4e-16
SLC8A1	48.5742	2.86387	0.391959	7.30655	2.74e-13	2.18e-12
PPM1H	124.685	2.86199	0.222801	12.8455	9.11e-38	1.95e-36
BEST3	5.7713	2.86134	1.04357	2.74189	0.00610866	0.0151362
ZFHX2	109.969	2.85968	0.237665	12.0324	2.4e-33	4.48e-32
AP1S3	109.78	2.85154	0.238454	11.9584	5.87e-33	1.08e-31
EGF	115.213	2.85098	0.229855	12.4034	2.51e-35	5.01e-34
EMB	385.845	2.84583	0.141147	20.1622	2.1e-90	1.14e-88
AKR1C2	7.00617	2.83655	0.947073	2.99507	0.00274384	0.00729816
COL6A3	18889.4	2.83339	0.0452673	62.5923	0	0
PLEKHN1	18.3673	2.8322	0.593888	4.76892	1.85e-06	8.22e-06
MAP3K7CL	72.5534	2.81878	0.290884	9.69042	3.31e-22	4.16e-21
TMEM100	100.233	2.81828	0.249599	11.2912	1.45e-29	2.42e-28
IL32	107.339	2.81732	0.241527	11.6646	1.93e-31	3.4e-30
MYO16	5.60536	2.81375	1.04501	2.69256	0.00709065	0.0172995
OLFM3	19.4818	2.81363	0.553538	5.083	3.72e-07	1.79e-06
PTPRB	4.18055	2.8127	1.1941	2.3555	0.0184976	0.0407124
MED12L	58.1493	2.8047	0.319467	8.77932	1.64e-18	1.75e-17
NCEH1	53.7788	2.79906	0.347876	8.04614	8.54e-16	7.82e-15
SORCS1	16.5664	2.79641	0.61421	4.55286	5.29e-06	2.23e-05
IGFBP5	7884.89	2.79607	0.0538566	51.9169	0	0
MAP2	45.4491	2.79193	0.385816	7.23643	4.61e-13	3.62e-12
GABRB2	139.229	2.78409	0.211902	13.1386	1.98e-39	4.44e-38
INPP4B	45.0468	2.78272	0.365989	7.60327	2.89e-14	2.44e-13
CTNNA2	9.5284	2.78105	0.819999	3.39153	0.000695032	0.00209159
SLFN5	694.907	2.77971	0.103949	26.741	1.57e-157	1.85e-155
DIRAS3	13.5805	2.77918	0.685912	4.0518	5.08e-05	0.000184797
PAPPA2	25.7111	2.76609	0.47674	5.80209	6.55e-09	3.76e-08
HLA-DPA1	28.3471	2.76509	0.464679	5.95052	2.67e-09	1.59e-08
KCNS1	8.03479	2.7585	0.88005	3.13448	0.00172158	0.00478299
ECRG4	13.4217	2.75117	0.676286	4.06805	4.74e-05	0.000173354
DKK2	50.3565	2.73914	0.363539	7.53465	4.9e-14	4.08e-13
CDHR1	12.0376	2.73377	0.733652	3.72625	0.000194351	0.000639235
NALCN	23.8749	2.73037	0.505352	5.40291	6.56e-08	3.42e-07
RNF144B	9.21133	2.72924	0.831967	3.28047	0.00103636	0.00301179
DGKG	13.2332	2.72162	0.670306	4.06027	4.9e-05	0.00017858
ZNF365	14.4406	2.7195	0.65665	4.14148	3.45e-05	0.00012878
WNT2B	682.091	2.70431	0.101558	26.6283	3.2e-156	3.65e-154
LRRC55	119.659	2.7027	0.219243	12.3274	6.45e-35	1.27e-33
PLXDC2	276.478	2.6968	0.15231	17.706	3.77e-70	1.6e-68
SERPINE1	3955.18	2.69228	0.0541796	49.6917	0	0
TRPA1	12.8957	2.69088	0.703913	3.82275	0.000131973	0.000447035
EPHX4	7.72077	2.69058	0.89143	3.01827	0.00254219	0.00682154
QPCT	72.2703	2.69012	0.302834	8.88318	6.5e-19	7.11e-18
SFRP4	19.2655	2.68218	0.539346	4.97303	6.59e-07	3.09e-06
SLC2A12	29.6107	2.6783	0.450029	5.95139	2.66e-09	1.58e-08
SOX4	877.504	2.67258	0.0893418	29.9141	1.29e-196	2.04e-194
SPINT2	488.912	2.66588	0.124387	21.4321	6.71e-102	4.27e-100
TNFRSF9	50.5136	2.66354	0.372019	7.15969	8.09e-13	6.25e-12
PLCD4	20.1709	2.65536	0.553086	4.80099	1.58e-06	7.07e-06
ID3	597.143	2.65317	0.113251	23.4274	2.25e-121	1.8e-119
NPPB	803.882	2.64433	0.112498	23.5055	3.58e-122	2.9e-120
AKR1D1	5.04836	2.63958	1.1065	2.38552	0.0170552	0.0378743
NRK	77.7609	2.63871	0.273835	9.63612	5.63e-22	6.97e-21
EVX1	50.7131	2.63775	0.732759	3.59975	0.000318521	0.00101448
STAC	18.7375	2.62716	0.573078	4.58429	4.56e-06	1.94e-05
AQP3	103.466	2.62636	0.249862	10.5112	7.67e-26	1.12e-24
IGFBP2	1461.2	2.62484	0.0806263	32.5556	1.74e-232	3.74e-230
ANGPT1	79.8149	2.62318	0.305359	8.59046	8.66e-18	8.88e-17
CCBE1	33.2438	2.61436	0.429268	6.09028	1.13e-09	6.95e-09
ST8SIA2	35.5819	2.61096	0.406367	6.42511	1.32e-10	8.74e-10
UPB1	9.77395	2.60431	0.762877	3.41381	0.000640623	0.001938
SLC4A4	209.168	2.59844	0.177238	14.6607	1.15e-48	3.21e-47
KALRN	145.509	2.59804	0.197078	13.1828	1.1e-39	2.5e-38
GALNT17	12.3086	2.59704	0.732631	3.54481	0.000392893	0.00123306
TFEC	6.12557	2.59169	1.06045	2.44394	0.0145278	0.0328692
F5	375.814	2.59165	0.126835	20.4333	8.46e-93	4.76e-91
SSC5D	227.566	2.59132	0.163422	15.8566	1.27e-56	4.2e-55
EDIL3	2514.44	2.58858	0.0589317	43.9251	0	0
MYO7B	135.441	2.58336	0.2252	11.4714	1.84e-30	3.17e-29
MX2	7.26855	2.58151	0.870438	2.96575	0.00301942	0.00795363
BHLHE41	100.452	2.5804	0.238535	10.8177	2.84e-27	4.4e-26
FOXL2	8.51144	2.57903	0.84858	3.03923	0.00237186	0.00640936
EFCAB5	4.80177	2.57621	1.09296	2.35709	0.0184187	0.040561
INSYN2A	16.8549	2.5743	0.598517	4.30114	1.7e-05	6.65e-05
GAL3ST3	5.94172	2.55775	0.980657	2.6082	0.00910195	0.0216553
SLITRK2	15.3731	2.54755	0.638532	3.9897	6.62e-05	0.000235855
PLCXD2	37.9307	2.54227	0.415677	6.11599	9.6e-10	5.95e-09
SLC35F3	9.44823	2.54147	0.759233	3.34741	0.0008157	0.00241722
CD38	16.4614	2.53205	0.592604	4.27275	1.93e-05	7.49e-05
ERN2	4.63973	2.52518	1.10061	2.29434	0.0217711	0.047201
NLRP1	30.2887	2.51983	0.447295	5.63349	1.77e-08	9.72e-08
MEDAG	61.8709	2.51882	0.298359	8.44223	3.11e-17	3.09e-16
BTN2A2	95.1486	2.51178	0.255806	9.81909	9.32e-23	1.2e-21
LAMA1	2603.91	2.51066	0.0665565	37.7223	0	0
GATM	187.711	2.49896	0.173981	14.3634	8.78e-47	2.36e-45
MDGA2	28.7667	2.49879	0.470322	5.31293	1.08e-07	5.48e-07
TNIK	726.136	2.49839	0.103626	24.1096	1.98e-128	1.72e-126
CADPS	21.952	2.49609	0.528687	4.7213	2.34e-06	1.03e-05
SV2B	19.5514	2.49599	0.575717	4.33544	1.45e-05	5.75e-05
STK38L	1105.01	2.48976	0.0827598	30.0842	7.79e-199	1.25e-196
RAB27B	66.3094	2.48669	0.295714	8.40909	4.13e-17	4.08e-16
NKAIN4	192.48	2.47897	0.168999	14.6685	1.03e-48	2.87e-47
TFPI2	136.474	2.47761	0.201839	12.2752	1.23e-34	2.39e-33
P4HA3	248.862	2.47442	0.151657	16.3159	7.61e-60	2.67e-58
DACT2	5.69148	2.46761	1.01135	2.43991	0.0146908	0.0331821
RNASE1	9.02334	2.46255	0.785775	3.13391	0.00172493	0.00479065
NRXN3	275.155	2.45615	0.142466	17.2402	1.33e-66	5.27e-65
LRATD1	96.5612	2.45244	0.267787	9.1582	5.28e-20	6.01e-19
LYG2	6.72695	2.44923	0.909739	2.69223	0.00709751	0.017311
BMP2	155.397	2.44786	0.190077	12.8782	5.97e-38	1.28e-36
MEGF10	11.1133	2.44259	0.703546	3.47183	0.000516926	0.00159069
MYH14	47.8059	2.44066	0.342346	7.12923	1.01e-12	7.77e-12
PLK2	1447.02	2.44008	0.0723755	33.7142	3.58e-249	8.23e-247
KIF5A	137.533	2.4337	0.198238	12.2767	1.21e-34	2.35e-33
CEMIP2	1998.24	2.43203	0.0664093	36.6218	1.28e-293	3.83e-291
SPRR2F	6.68199	2.43152	0.923897	2.6318	0.0084933	0.0203667
PABPC4L	1481.09	2.42973	0.0759883	31.9751	2.42e-224	4.7e-222
LTBP2	503.48	2.4288	0.108911	22.3008	3.63e-110	2.55e-108
CADM3	151.435	2.42786	0.195301	12.4314	1.77e-35	3.55e-34
DACH1	119.263	2.4262	0.214599	11.3058	1.23e-29	2.07e-28
EDNRA	189.459	2.42601	0.188304	12.8834	5.58e-38	1.2e-36
CRLF1	6.58954	2.42359	0.895092	2.70765	0.00677617	0.0166027
CNTN3	7.74828	2.42257	0.846478	2.86195	0.00421048	0.0107789
CLUL1	34.2318	2.42225	0.410299	5.90362	3.56e-09	2.08e-08
DRAXIN	12.0332	2.41666	0.664298	3.63791	0.000274854	0.000885031
SPSB4	9.85993	2.41264	0.739484	3.2626	0.00110396	0.00319097
NPAP1	27.3117	2.41126	0.441766	5.45823	4.81e-08	2.54e-07
MOXD1	3034.75	2.41094	0.0527686	45.6888	0	0
KIT	1336.41	2.41074	0.0790766	30.4861	3.98e-204	6.61e-202
NDRG4	323.099	2.4007	0.134137	17.8974	1.24e-71	5.33e-70
STXBP5L	209.566	2.39547	0.165833	14.4451	2.69e-47	7.3e-46
LDB3	30.2615	2.38699	0.431927	5.52637	3.27e-08	1.76e-07
REPS2	38.7158	2.38217	0.373754	6.37362	1.85e-10	1.21e-09
CX3CR1	9.58491	2.37581	0.759243	3.12919	0.0017529	0.00485661
ARHGAP26	148.987	2.37578	0.195954	12.1242	7.86e-34	1.49e-32
AIM2	11.8225	2.37341	0.670448	3.54004	0.000400068	0.00125289
COL24A1	27.7345	2.36494	0.434799	5.43915	5.35e-08	2.82e-07
MPP4	5.27017	2.36443	1.02809	2.29983	0.021458	0.0465787
BMP10	5.27939	2.36166	1.00783	2.3433	0.0191138	0.0419139
TMEM40	12.7185	2.35889	0.635601	3.71127	0.000206221	0.00067648
PRSS8	12.5978	2.35643	0.716191	3.29022	0.00100108	0.00291771
SELPLG	79.7662	2.35538	0.282994	8.32306	8.57e-17	8.32e-16
JAG1	518.609	2.3545	0.106059	22.1999	3.44e-109	2.38e-107
PTGES3L	14.6686	2.33015	0.609822	3.82103	0.000132893	0.000449869
SERPINE2	3985.12	2.32899	0.0516715	45.073	0	0
RTN1	11.4127	2.3258	0.694667	3.34808	0.000813721	0.0024118
KIF5C	43.7412	2.3182	0.377153	6.14658	7.92e-10	4.94e-09
RBM24	25.8249	2.31589	0.462443	5.00794	5.5e-07	2.6e-06
GRM1	5.18613	2.31493	1.01512	2.28046	0.0225803	0.0487715
ITGA2	74.5762	2.31243	0.271266	8.52458	1.53e-17	1.54e-16
SNCAIP	650.931	2.30948	0.104292	22.1445	1.18e-108	8.08e-107
COL2A1	103.899	2.30498	0.225224	10.2342	1.39e-24	1.93e-23
DKK3	692.619	2.29743	0.093405	24.5965	1.38e-133	1.31e-131
ARMC4	22.3909	2.28742	0.485788	4.70868	2.49e-06	1.09e-05
MMP1	10.1243	2.28741	0.726546	3.14833	0.00164206	0.00458264
RUBCNL	10.1432	2.28728	0.717473	3.18796	0.00143279	0.00404701
UNC13A	40.6388	2.28574	0.358853	6.36957	1.9e-10	1.24e-09
SP6	6.11589	2.28397	0.909095	2.51236	0.0119927	0.0276583
RTL9	31.4381	2.28116	0.411597	5.54223	2.99e-08	1.61e-07
HGD	7.1096	2.27976	0.852419	2.67446	0.00748502	0.0181489
RAB17	8.05853	2.27782	0.822585	2.7691	0.00562118	0.0140312
LAMB3	6.10523	2.26605	0.971853	2.33168	0.0197176	0.043144
TLR5	8.07364	2.26428	0.793538	2.8534	0.00432537	0.0110323
PLPPR5	13.9663	2.2606	0.652006	3.46715	0.000526003	0.00161677
MPV17L	27.1726	2.25315	0.483595	4.65917	3.17e-06	1.38e-05
PDLIM3	748.614	2.251	0.0935428	24.0638	5.98e-128	5.13e-126
OVCH2	9.99742	2.24446	0.755273	2.97172	0.00296138	0.00781867
PLPP4	12.8832	2.2407	0.619939	3.61438	0.000301065	0.0009625
WFDC1	189.386	2.24026	0.168076	13.3288	1.57e-40	3.69e-39
EPCAM	15.8464	2.23929	0.590427	3.79266	0.000149042	0.00049974
DCLK2	310.751	2.23919	0.142218	15.7448	7.46e-56	2.43e-54
TUBA4A	22.7993	2.23706	0.503509	4.44295	8.87e-06	3.62e-05
PTGER2	111.817	2.23608	0.220714	10.1312	4.02e-24	5.44e-23
ACTN2	131.238	2.23579	0.20598	10.8544	1.9e-27	2.97e-26
MMP24	145.66	2.2345	0.204617	10.9204	9.21e-28	1.46e-26
CRHR2	11.7107	2.23232	0.734427	3.03954	0.00236942	0.0064049
PPP2R2B	731.655	2.22697	0.0901368	24.7065	9.1e-135	8.72e-133
ISL1	84.5108	2.22339	0.246206	9.03061	1.71e-19	1.91e-18
ITGAV	6030.1	2.22271	0.0556754	39.9226	0	0
EPSTI1	107.837	2.22105	0.22597	9.82894	8.45e-23	1.09e-21
ASB5	9.82608	2.21928	0.739485	3.00112	0.00268993	0.00717136
ITGA11	4145.4	2.21482	0.0507969	43.6014	0	0
GAP43	62.4636	2.21372	0.299987	7.3794	1.59e-13	1.29e-12
CYTL1	170.805	2.21271	0.185218	11.9465	6.77e-33	1.24e-31
TDO2	10.7761	2.21267	0.695614	3.18089	0.00146823	0.00414058
ENPP5	9.70548	2.20852	0.73383	3.00958	0.00261605	0.00699293
ADAM21	6.75909	2.2041	0.913253	2.41346	0.0158017	0.0353785
CHST7	81.2108	2.19809	0.257236	8.54504	1.28e-17	1.3e-16
EPHB2	1006.1	2.19755	0.080727	27.222	3.57e-163	4.35e-161
TMEM200C	26.9787	2.19559	0.4385	5.00704	5.53e-07	2.62e-06
ERICH5	63.7174	2.19489	0.281537	7.79611	6.38e-15	5.57e-14
WDR63	45.4877	2.19475	0.347042	6.32417	2.55e-10	1.65e-09
CALB2	53.756	2.18359	0.305228	7.15395	8.43e-13	6.51e-12
IGSF9	6.71371	2.18146	0.881605	2.47442	0.0133454	0.0304466
CD200R1	17.2605	2.17969	0.539609	4.03939	5.36e-05	0.000194067
MAB21L2	34.2947	2.1773	0.407244	5.34642	8.97e-08	4.6e-07
SRRM4	9.5922	2.17587	0.787959	2.76139	0.00575555	0.0143354
TRIM73	11.4798	2.17357	0.655131	3.31777	0.000907399	0.0026698
CYP26A1	10.4492	2.16701	0.691941	3.13179	0.00173747	0.00481881
CRACR2A	22.8324	2.16487	0.474968	4.55794	5.17e-06	2.18e-05
IRF6	17.0687	2.16166	0.55276	3.91067	9.2e-05	0.000319845
IL33	15.119	2.15388	0.579549	3.71647	0.000202028	0.000663536
LAYN	348.228	2.14982	0.123767	17.37	1.39e-67	5.67e-66
MSANTD1	16.8987	2.1495	0.575398	3.73568	0.000187209	0.000617636
THSD1	47.0057	2.14413	0.345478	6.20627	5.43e-10	3.44e-09
TCTEX1D4	15.9404	2.14285	0.558078	3.8397	0.000123184	0.000420006
SPX	15.0183	2.14182	0.579021	3.69904	0.000216414	0.000707177
DDIT4L	10.3115	2.13878	0.700483	3.0533	0.00226342	0.00614105
FAM241B	36.0633	2.12524	0.387929	5.47844	4.29e-08	2.28e-07
RASGRP2	15.7044	2.12172	0.585019	3.62675	0.000287011	0.000920677
HOXB2	31.5209	2.12149	0.419785	5.05375	4.33e-07	2.07e-06
CDH13	221.176	2.12065	0.159097	13.3293	1.56e-40	3.67e-39
DEPDC7	28.7686	2.117	0.421885	5.01797	5.22e-07	2.48e-06
NKD1	64.6393	2.11519	0.289957	7.29483	2.99e-13	2.37e-12
TLL2	29.4247	2.11464	0.431158	4.90455	9.36e-07	4.32e-06
LANCL3	11.0251	2.11197	0.703558	3.00184	0.00268357	0.00715783
AHNAK2	363.31	2.10894	0.131373	16.053	5.44e-58	1.85e-56
DBNDD1	31.2568	2.10869	0.394538	5.3447	9.06e-08	4.64e-07
CHMP4C	36.8245	2.10824	0.37157	5.67386	1.4e-08	7.76e-08
CHRDL2	26.7593	2.10822	0.449167	4.69363	2.68e-06	1.17e-05
HRCT1	7.41491	2.10658	0.862342	2.44286	0.0145713	0.0329399
ALPL	98.4091	2.10655	0.232392	9.06465	1.25e-19	1.4e-18
ME3	71.5286	2.10145	0.263268	7.98218	1.44e-15	1.3e-14
TENM4	282.24	2.09524	0.137106	15.2819	1.01e-52	3.09e-51
H2BC8	8.21277	2.09293	0.767714	2.72619	0.00640702	0.0158113
TPD52	201.387	2.09291	0.162548	12.8757	6.17e-38	1.32e-36
SYNM	664.081	2.09278	0.0948294	22.0689	6.29e-108	4.27e-106
PKD1L1	18.231	2.08936	0.523442	3.99157	6.56e-05	0.00023421
TANC1	1410.66	2.08386	0.0792064	26.3092	1.5e-152	1.67e-150
NFASC	278.991	2.07873	0.146187	14.2197	6.92e-46	1.82e-44
MPP7	28.7202	2.07596	0.453059	4.58211	4.6e-06	1.96e-05
PNMA8A	553.071	2.07546	0.105166	19.735	1.08e-86	5.57e-85
CADM1	1358.51	2.0738	0.0704165	29.4505	1.24e-190	1.85e-188
TRIM71	192.965	2.07371	0.171399	12.0987	1.07e-33	2.02e-32
TRIL	32.4067	2.06928	0.386435	5.35479	8.57e-08	4.4e-07
SLC2A5	6.29724	2.06622	0.881165	2.34487	0.0190335	0.0417549
PDE4D	142.049	2.06515	0.193103	10.6946	1.08e-26	1.63e-25
CDH8	546.012	2.06131	0.100694	20.4709	3.91e-93	2.22e-91
PLEKHG1	60.943	2.05971	0.288745	7.13333	9.8e-13	7.55e-12
MICAL2	1089.06	2.05716	0.0798349	25.7676	2.05e-146	2.14e-144
CNN1	2190.66	2.05115	0.0600418	34.162	8.86e-256	2.13e-253
RASGRP3	46.3682	2.04972	0.329408	6.22243	4.9e-10	3.11e-09
CPE	1645.94	2.04911	0.0684433	29.9388	6.16e-197	9.83e-195
DPP10	527.489	2.04418	0.106132	19.2607	1.15e-82	5.69e-81
UCP2	408.565	2.0428	0.125374	16.2937	1.09e-59	3.83e-58
C3orf52	187.659	2.04165	0.168446	12.1205	8.23e-34	1.56e-32
GRIK5	55.7461	2.04077	0.307259	6.64185	3.1e-11	2.17e-10
OCLN	74.3952	2.03969	0.26158	7.79758	6.31e-15	5.51e-14
HKDC1	14.9754	2.03832	0.574736	3.54653	0.000390335	0.00122575
GCSAM	29.2031	2.03796	0.404968	5.03241	4.84e-07	2.31e-06
ECM1	120.861	2.03272	0.20213	10.0565	8.6e-24	1.15e-22
CACNG7	22.0435	2.03166	0.48007	4.232	2.32e-05	8.89e-05
GDNF	35.204	2.02908	0.391333	5.18505	2.16e-07	1.07e-06
CENPVL3	12.4212	2.02896	0.668535	3.03493	0.00240592	0.00649376
MRO	11.409	2.02823	0.662599	3.06103	0.00220579	0.00600087
IGFBP6	263.292	2.02369	0.144998	13.9567	2.86e-44	7.3e-43
SPRN	10.4649	2.02271	0.693704	2.91581	0.00354764	0.0092273
TRPM6	7.84504	2.02054	0.821495	2.45959	0.0139097	0.0316041
SCG3	12.3061	2.01959	0.644802	3.1321	0.00173559	0.00481443
THY1	9031.86	2.0137	0.0537103	37.4918	1.25e-307	4.29e-305
EPDR1	278.326	2.00931	0.153672	13.0753	4.56e-39	1.01e-37
PLPPR4	21.7215	2.00303	0.475979	4.20824	2.57e-05	9.8e-05
FHL2	352.958	2.00206	0.124341	16.1013	2.5e-58	8.54e-57
AQP10	28.6656	2.00182	0.435806	4.59337	4.36e-06	1.86e-05
NID2	7253.54	2.00126	0.0450556	44.4176	0	0

## Sheet: S_PM vs S_NC_up
gene	baseMean	log2FoldChange	lfcSE	stat	pvalue	padj
SST	1634	14.1471	1.18211	11.9676	5.25e-33	6.56e-32
WNT2	1594.65	14.1121	1.18084	11.9509	6.42e-33	8.01e-32
HOXA13	1078.11	13.5473	1.18155	11.4658	1.96e-30	2.3e-29
TBX4	1637.17	13.1881	1.18087	11.1681	5.84e-29	6.54e-28
GATA4	1360.69	12.9213	1.18105	10.9405	7.38e-28	7.97e-27
FOXF1	361.315	11.97	1.18458	10.1048	5.26e-24	4.95e-23
DRD2	343.471	11.897	1.1847	10.0422	9.94e-24	9.25e-23
PITX2	4124.37	11.303	0.462034	24.4636	3.6e-132	2.09e-130
PITX1	431.28	11.2631	1.18375	9.51481	1.82e-21	1.53e-20
HGF	3628.86	11.1187	0.463119	24.0082	2.28e-127	1.27e-125
TBX20	188.747	11.0335	1.18876	9.28151	1.67e-20	1.36e-19
LRRN4	987.284	10.9774	0.837977	13.0999	3.3e-39	4.98e-38
HAND1	353.367	10.9756	1.18486	9.26321	1.98e-20	1.61e-19
HAND2	1297.82	10.9565	0.729509	15.0191	5.51e-51	1.06e-49
HOXD10	581.527	10.7988	1.02578	10.5274	6.46e-26	6.5e-25
DPP4	2739.86	10.575	0.442336	23.9073	2.57e-126	1.42e-124
HOXB13	124.706	10.4351	1.19294	8.7474	2.18e-18	1.63e-17
HSD17B2	103.257	10.164	1.20053	8.46627	2.53e-17	1.81e-16
SLC22A2	87.5447	9.92573	1.20084	8.26567	1.39e-16	9.62e-16
AQP4	166.262	9.88716	1.19013	8.30764	9.76e-17	6.82e-16
EGFL6	5708.68	9.84535	0.245405	40.1188	0	0
SYPL2	1051.21	9.84458	0.553207	17.7955	7.66e-71	2.13e-69
HOXA11	147.265	9.71175	1.19078	8.15579	3.47e-16	2.37e-15
FGL2	679.161	9.6999	0.653195	14.8499	6.96e-50	1.31e-48
GABRB2	129.522	9.52657	1.19217	7.99095	1.34e-15	8.87e-15
DHRS9	64.6299	9.48749	1.20476	7.87498	3.41e-15	2.21e-14
FMOD	396.125	9.24323	0.731083	12.6432	1.22e-36	1.7e-35
SLC7A4	53.408	9.21198	1.20951	7.61627	2.61e-14	1.61e-13
HOXD11	103.685	9.20556	1.19627	7.69523	1.41e-14	8.88e-14
REN	53.1832	9.20542	1.2116	7.59776	3.01e-14	1.86e-13
TNFRSF8	49.4236	9.0998	1.21261	7.50432	6.17e-14	3.72e-13
FLT1	7759.88	9.07516	0.169031	53.6894	0	0
F5	343.648	9.03753	0.731931	12.3475	5.02e-35	6.65e-34
EVX1	46.4652	9.01116	1.21494	7.41697	1.2e-13	7.12e-13
CHI3L1	81.8578	8.86374	1.20038	7.38409	1.53e-13	9.06e-13
ACP3	41.1613	8.83741	1.22601	7.20824	5.67e-13	3.24e-12
PCP4	864.065	8.78291	0.431936	20.3338	6.46e-92	2.38e-90
APLNR	700.128	8.7422	0.467487	18.7004	4.91e-78	1.52e-76
PTPN20	37.4296	8.69864	1.22633	7.09323	1.31e-12	7.28e-12
SLC22A3	3430.64	8.68358	0.215374	40.3187	0	0
TNNT2	247.249	8.56158	0.737342	11.6114	3.61e-31	4.31e-30
MASP1	653.942	8.50493	0.446701	19.0394	8.04e-81	2.6e-79
VTN	2235.5	8.48986	0.24738	34.3191	4.08e-258	6.8e-256
TTLL6	32.0098	8.47416	1.23189	6.87899	6.03e-12	3.22e-11
HOXD9	286.933	8.45432	0.660316	12.8034	1.57e-37	2.25e-36
LAMA3	755.709	8.36599	0.39997	20.9166	3.78e-97	1.48e-95
DUOX2	57.5001	8.35252	1.20761	6.91657	4.63e-12	2.49e-11
MYO3B	27.2433	8.24196	1.24158	6.63827	3.17e-11	1.61e-10
CASP10	52.805	8.22904	1.21392	6.77888	1.21e-11	6.34e-11
FSHR	26.7227	8.21285	1.24166	6.61441	3.73e-11	1.89e-10
CDX2	26.4883	8.20067	1.24302	6.59738	4.18e-11	2.11e-10
RASSF6	25.8	8.16283	1.24553	6.5537	5.61e-11	2.8e-10
SDR42E1	24.5979	8.0942	1.24546	6.49894	8.09e-11	3.98e-10
MME	9249.6	8.07799	0.120659	66.9488	0	0
ALPP	23.2312	8.01306	1.26931	6.31291	2.74e-10	1.3e-09
SYT10	422.138	8.00989	0.474572	16.8781	6.52e-64	1.62e-62
ABO	204.971	7.96805	0.664734	11.9868	4.17e-33	5.23e-32
TXNIP	2435.66	7.95292	0.340859	23.332	2.1e-120	1.08e-118
NPNT	5816.09	7.93634	0.139899	56.729	0	0
HOXC12	21.8693	7.92312	1.25343	6.32117	2.6e-10	1.23e-09
CFI	116.063	7.88283	0.855467	9.21465	3.12e-20	2.51e-19
TBX2	462.414	7.87831	0.431463	18.2595	1.74e-74	5.1e-73
SLC14A1	20.0728	7.80063	1.25842	6.19877	5.69e-10	2.63e-09
HOXC11	19.7252	7.77362	1.26675	6.13669	8.43e-10	3.84e-09
FAM163A	18.8181	7.70836	1.27193	6.06035	1.36e-09	6.08e-09
TAFA3	35.8087	7.66698	1.22452	6.26121	3.82e-10	1.79e-09
ADRB3	17.9406	7.63782	1.26725	6.02709	1.67e-09	7.41e-09
DHRS3	684.361	7.63495	0.334444	22.8288	2.38e-115	1.15e-113
ATP12A	212.75	7.53455	0.566178	13.3078	2.09e-40	3.25e-39
CXCL14	11643.7	7.51135	0.11243	66.8092	0	0
HOXD12	16.1787	7.4897	1.28202	5.84209	5.15e-09	2.2e-08
ASPG	145.163	7.46619	0.669972	11.144	7.66e-29	8.56e-28
AKR1B15	15.8473	7.45977	1.27874	5.83368	5.42e-09	2.31e-08
HOXC10	15.4268	7.41965	1.28344	5.78106	7.42e-09	3.14e-08
HPGD	29.8988	7.40558	1.23236	6.00927	1.86e-09	8.24e-09
PRAC1	15.2489	7.4032	1.30652	5.66636	1.46e-08	6e-08
IL1RL1	15.1285	7.39089	1.28837	5.73662	9.66e-09	4.05e-08
ANKK1	14.8567	7.36632	1.28999	5.71037	1.13e-08	4.68e-08
SPATA46	27.2883	7.27317	1.24687	5.83313	5.44e-09	2.32e-08
COL15A1	2516.11	7.24517	0.166358	43.5517	0	0
CD244	13.609	7.24075	1.30824	5.53473	3.12e-08	1.25e-07
IRF8	145.109	7.20102	0.616501	11.6805	1.6e-31	1.93e-30
HSD3B2	24.7504	7.13209	1.24653	5.72156	1.06e-08	4.4e-08
AQP10	24.5406	7.11988	1.25054	5.69344	1.25e-08	5.14e-08
VSIR	331.733	7.07236	0.393317	17.9813	2.73e-72	7.78e-71
CHRDL2	23.2467	7.04096	1.24848	5.63964	1.7e-08	6.97e-08
NID2	6221.92	7.01835	0.112276	62.51	0	0
C4BPB	22.5292	6.99415	1.25719	5.56332	2.65e-08	1.06e-07
TBX3	452.587	6.9678	0.328209	21.2298	5.07e-100	2.07e-98
SLC39A2	81.4992	6.9543	0.759854	9.15215	5.58e-20	4.45e-19
C2orf72	38.6666	6.87696	1.06939	6.43075	1.27e-10	6.17e-10
DAPP1	171.209	6.85395	0.508619	13.4756	2.18e-41	3.47e-40
COL21A1	980.21	6.83886	0.220507	31.0142	3.47e-211	4.38e-209
SLC19A3	9.97751	6.79153	1.33578	5.08431	3.69e-07	1.34e-06
TGFBR3	1572.1	6.74476	0.177516	37.9951	0	0
TCHH	9.59301	6.73278	1.40921	4.77769	1.77e-06	5.98e-06
AMHR2	9.53612	6.72859	1.36185	4.94077	7.78e-07	2.73e-06
KCNN2	225.127	6.7171	0.430345	15.6087	6.36e-55	1.32e-53
RBP3	9.37425	6.70383	1.35783	4.93717	7.93e-07	2.78e-06
ITLN2	9.21749	6.67523	1.36277	4.89828	9.67e-07	3.36e-06
ITLN1	9.17645	6.66966	1.35086	4.93733	7.92e-07	2.78e-06
GATA5	17.828	6.65512	1.27639	5.214	1.85e-07	6.92e-07
SLC25A48	48.4067	6.61587	0.882768	7.49446	6.66e-14	4.01e-13
C4orf54	8.82024	6.61305	1.3668	4.83836	1.31e-06	4.49e-06
OLR1	63.6751	6.59618	0.771397	8.55096	1.22e-17	8.86e-17
NR5A2	8.67363	6.58819	1.36187	4.83761	1.31e-06	4.51e-06
DMRT2	8.62664	6.58159	1.3628	4.82946	1.37e-06	4.68e-06
ASB5	8.59777	6.57751	1.36788	4.80854	1.52e-06	5.17e-06
NOX5	94.3434	6.57686	0.626236	10.5022	8.44e-26	8.46e-25
CX3CR1	8.55339	6.57126	1.36924	4.79922	1.59e-06	5.4e-06
ADAMTS19	139.324	6.55203	0.512605	12.7818	2.07e-37	2.95e-36
SBSPON	2514.09	6.52053	0.141165	46.1908	0	0
XKR5	30.2441	6.51833	1.08204	6.02413	1.7e-09	7.55e-09
ABCC9	390.052	6.50707	0.310104	20.9835	9.28e-98	3.66e-96
PI3	8.09924	6.4912	1.37068	4.73576	2.18e-06	7.29e-06
WFDC10B	8.04628	6.48311	1.3857	4.67859	2.89e-06	9.53e-06
SELL	7.95884	6.4651	1.3853	4.66694	3.06e-06	1.01e-05
LTBR	201.973	6.45023	0.416714	15.4788	4.82e-54	9.87e-53
ANXA8L1	42.2421	6.41564	0.888667	7.2194	5.22e-13	3e-12
CYP4X1	28.0934	6.41351	1.08956	5.88634	3.95e-09	1.7e-08
CHRM2	254.49	6.40176	1.01802	6.28844	3.21e-10	1.51e-09
CD22	7.47391	6.37381	1.40272	4.54388	5.52e-06	1.77e-05
MINAR2	7.25262	6.33201	1.39395	4.54249	5.56e-06	1.78e-05
DUOXA2	7.09074	6.2992	1.39152	4.52686	5.99e-06	1.91e-05
TRIM55	6.90907	6.26216	1.40387	4.46063	8.17e-06	2.56e-05
IRAG2	13.59	6.2574	1.3077	4.78505	1.71e-06	5.78e-06
HPSE2	6.54403	6.18472	1.4336	4.31411	1.6e-05	4.83e-05
HOXD13	36.0444	6.1814	0.897721	6.88566	5.75e-12	3.08e-11
ELF3	35.8171	6.17472	0.90415	6.8293	8.53e-12	4.51e-11
FGFBP1	6.43654	6.15877	1.41344	4.3573	1.32e-05	4.02e-05
NXPE1	6.43511	6.15849	1.41342	4.35715	1.32e-05	4.02e-05
MTTP	6.25319	6.11762	1.42085	4.30561	1.67e-05	5.02e-05
ARHGAP8	33.9081	6.08966	0.901963	6.75156	1.46e-11	7.6e-11
ZFP42	77.7371	6.06531	0.59542	10.1866	2.28e-24	2.17e-23
PTGFR	332.103	6.06368	0.293532	20.6576	8.33e-95	3.19e-93
SPRR2F	6.00077	6.05512	1.46006	4.14716	3.37e-05	9.8e-05
FAM83B	21.7891	6.04006	1.10802	5.45122	5e-08	1.97e-07
ITGAX	5.88363	6.03097	1.43634	4.19886	2.68e-05	7.91e-05
ECHDC2	318.954	6.02252	0.795098	7.57457	3.6e-14	2.21e-13
CYSLTR2	5.78998	6.00485	1.44923	4.14347	3.42e-05	9.95e-05
TMPRSS11E	5.75515	5.99748	1.44387	4.15375	3.27e-05	9.54e-05
LRRK2	5.71101	5.98817	1.44773	4.13626	3.53e-05	0.000102505
EGFLAM	576.943	5.98421	0.220309	27.1628	1.79e-162	1.45e-160
SERPINB9	1110.42	5.94116	0.163984	36.2301	2.04e-287	4.29e-285
FILIP1	191.544	5.92482	0.366469	16.1673	8.58e-59	1.95e-57
GPRC5A	969.758	5.91375	0.176886	33.4326	4.61e-245	7.03e-243
RSPO2	4763.81	5.87796	0.0967793	60.7358	0	0
COLEC11	5.29647	5.87561	1.47899	3.97271	7.11e-05	0.000198249
CPXM2	58.1175	5.86834	0.651159	9.01214	2.02e-19	1.57e-18
NOS1	5.22942	5.86011	1.46115	4.01061	6.06e-05	0.000170227
BLK	5.21272	5.85624	1.46538	3.99639	6.43e-05	0.000180182
DLG2	412.918	5.85485	0.249106	23.5034	3.76e-122	1.98e-120
PTPRH	86.0975	5.84924	0.528075	11.0765	1.63e-28	1.8e-27
PKHD1L1	5.17479	5.84717	1.49382	3.91424	9.07e-05	0.000249523
NPPB	750.08	5.83807	0.199113	29.3203	5.72e-189	6e-187
GPC5	160.877	5.83292	0.389325	14.9821	9.61e-51	1.83e-49
ISL1	75.3395	5.82695	0.565687	10.3007	7e-25	6.79e-24
ADAM28	10.0527	5.81957	1.33827	4.34857	1.37e-05	4.17e-05
ALPG	5.0506	5.81039	1.47708	3.93371	8.36e-05	0.000231286
BDKRB1	9.96556	5.80445	1.32977	4.36499	1.27e-05	3.89e-05
GRPR	5.02484	5.80415	1.48409	3.91092	9.19e-05	0.000252747
P2RY1	330.495	5.789	0.27404	21.1246	4.72e-99	1.9e-97
ADAMTS20	209.13	5.77562	0.342937	16.8416	1.21e-63	3.01e-62
ACTBL2	63.3537	5.76776	0.602648	9.57069	1.06e-21	9.07e-21
ANXA8	54.2691	5.76643	0.649285	8.8812	6.61e-19	5.07e-18
SMCO3	4.89016	5.76344	1.48	3.89421	9.85e-05	0.000269781
TDO2	9.57905	5.74767	1.34108	4.28584	1.82e-05	5.46e-05
TAC3	99.1452	5.73649	0.966391	5.936	2.92e-09	1.28e-08
GPRC5D	4.77981	5.72782	1.51594	3.77838	0.00015785	0.000421404
SPON1	653.163	5.71	0.19597	29.1371	1.22e-186	1.24e-184
BMP10	4.70537	5.70866	1.49403	3.82099	0.000132918	0.000358814
CNTNAP5	9.32325	5.70621	1.34234	4.25095	2.13e-05	6.35e-05
SSTR1	190.239	5.69808	0.346786	16.4311	1.15e-60	2.69e-59
ISM2	43.0465	5.69701	0.723101	7.87858	3.31e-15	2.15e-14
CLCA2	4.61936	5.67806	1.52573	3.72153	0.000198022	0.000520649
TLE6	25.5088	5.67743	0.920207	6.16973	6.84e-10	3.14e-09
TMEM272	25.5372	5.67731	0.926592	6.12709	8.95e-10	4.07e-09
ERVH48-1	282.96	5.6754	0.630569	9.00045	2.25e-19	1.75e-18
SMLR1	4.5936	5.67107	1.50489	3.76842	0.000164286	0.000437357
DPEP1	4.57665	5.66669	1.52079	3.72615	0.000194428	0.000511616
WFDC13	4.57665	5.66669	1.52079	3.72615	0.000194428	0.000511616
CLEC1B	4.56902	5.66466	1.52658	3.7107	0.000206688	0.000542376
ODAM	9.04113	5.66409	1.35659	4.17523	2.98e-05	8.74e-05
CCDC60	4.56163	5.66263	1.49878	3.77817	0.000157986	0.000421696
ST6GALNAC5	345.347	5.66249	0.258828	21.8774	4.26e-106	1.85e-104
HSD3B1	4.54325	5.65778	1.50828	3.75114	0.000176032	0.000466474
E2F8	75.3844	5.65617	0.536959	10.5337	6.04e-26	6.08e-25
TPPP2	4.52512	5.6529	1.51189	3.73897	0.000184776	0.000488045
CPED1	98.4648	5.63947	0.791342	7.12647	1.03e-12	5.76e-12
MARCHF3	305.139	5.63028	0.271196	20.7609	9.77e-96	3.77e-94
NAT2	4.43768	5.62056	1.52415	3.68766	0.000226325	0.000590169
MS4A4E	4.41024	5.61299	1.51011	3.71693	0.000201657	0.000529689
DMC1	24.4248	5.60863	0.92888	6.03806	1.56e-09	6.94e-09
FAM71F1	4.36921	5.6017	1.51816	3.68979	0.00022444	0.000585537
CSGALNACT1	102.808	5.56831	0.452732	12.2993	9.13e-35	1.2e-33
PTPRT	4.25122	5.55946	1.52644	3.64211	0.000270408	0.000697135
SMTNL2	62.709	5.55508	0.569377	9.75641	1.73e-22	1.53e-21
TCTEX1D1	8.378	5.55057	1.37039	4.05036	5.11e-05	0.000145076
PRRT4	23.2245	5.54162	0.930446	5.95587	2.59e-09	1.13e-08
CFTR	38.2738	5.5231	0.721509	7.65493	1.93e-14	1.21e-13
MBNL3	1147.28	5.51508	0.345422	15.9662	2.2e-57	4.82e-56
CAMK2A	190.262	5.51428	0.328736	16.7742	3.77e-63	9.26e-62
CRHBP	15.1936	5.50755	1.13651	4.84602	1.26e-06	4.33e-06
AREG	4.05427	5.49255	1.53473	3.57884	0.000345123	0.000875373
TACSTD2	37.397	5.48794	0.726689	7.55198	4.29e-14	2.61e-13
CST6	4.02398	5.48328	1.57988	3.47069	0.000519126	0.00128525
PLAC1	104.042	5.47635	0.44001	12.446	1.47e-35	1.98e-34
STAR	81.1625	5.47033	0.495415	11.0419	2.4e-28	2.63e-27
TFAP2A	14.799	5.46327	1.14921	4.75394	1.99e-06	6.69e-06
MLIP	72.6566	5.4466	0.519305	10.4883	9.78e-26	9.76e-25
SLC40A1	943.39	5.442	0.156415	34.792	3.21e-265	5.64e-263
GUCY1A1	520.465	5.43932	0.209857	25.9191	4.05e-148	2.84e-146
IGFBP1	3.9091	5.43858	1.58069	3.44063	0.000580362	0.00142464
GPR158	86.2394	5.43568	1.23349	4.40676	1.05e-05	3.24e-05
SLN	3.89979	5.43565	1.5506	3.5055	0.000455744	0.00113739
SELP	3.89215	5.4333	1.55328	3.49795	0.000468847	0.00116739
AC213203.2	3.87068	5.42653	1.61756	3.35476	0.000794333	0.00190362
SCNN1A	7.62432	5.4099	1.37471	3.93532	8.31e-05	0.000229821
CDH3	1392.69	5.40448	0.132609	40.755	0	0
RARRES1	112.719	5.40074	0.423415	12.7552	2.92e-37	4.13e-36
IGF2	63.0388	5.38981	0.545077	9.88815	4.69e-23	4.25e-22
CA4	3.72264	5.36903	1.56411	3.43264	0.000597742	0.00146352
NPPC	7.39994	5.36773	1.38059	3.88801	0.000101071	0.000276351
HOXA10	213.3	5.36415	0.301099	17.8153	5.38e-71	1.51e-69
FAM111B	95.9962	5.36062	0.441294	12.1475	5.92e-34	7.63e-33
TNFSF15	73.8497	5.32894	0.500412	10.6491	1.76e-26	1.8e-25
ANKRD29	93.612	5.32247	0.439716	12.1043	1e-33	1.28e-32
STXBP5L	191.986	5.30825	0.313326	16.9416	2.22e-64	5.6e-63
CCN4	556.111	5.30756	0.192313	27.5986	1.16e-167	1.02e-165
TDRD12	3.55146	5.30126	1.57793	3.35963	0.000780467	0.00187233
CRYGD	3.53333	5.29498	1.61129	3.28618	0.00101556	0.00239823
RDH10	2465.74	5.2863	0.114099	46.3308	0	0
AKAP6	1194.13	5.26955	0.138284	38.1067	0	0
GATA3	25.7105	5.26549	0.82102	6.41335	1.42e-10	6.9e-10
ALDH1A2	139.89	5.2462	0.354505	14.7987	1.49e-49	2.79e-48
SOD3	379.515	5.24065	0.222895	23.5117	3.1e-122	1.64e-120
SERTM2	3.40461	5.23885	1.60716	3.2597	0.00111532	0.00261546
GOLT1A	3.38934	5.23343	1.61335	3.24382	0.00117936	0.00275129
OSR2	3.38194	5.2307	1.62149	3.22586	0.00125596	0.00291314
SPTA1	25.0466	5.22996	0.842296	6.20917	5.33e-10	2.46e-09
NMUR2	6.74442	5.22891	1.42077	3.68035	0.000232916	0.000606573
RSPO4	143.063	5.21575	0.353933	14.7365	3.76e-49	6.94e-48
SMPX	24.7677	5.21049	0.85812	6.07199	1.26e-09	5.66e-09
LOXL4	1423.94	5.20058	0.125186	41.5428	0	0
TPD52	178.33	5.19514	0.315997	16.4405	9.81e-61	2.32e-59
CCKBR	12.1381	5.18389	1.17562	4.40948	1.04e-05	3.21e-05
ATP7B	6785.72	5.17057	0.097798	52.8698	0	0
CYSLTR1	3.24726	5.16968	1.63386	3.16409	0.00155568	0.00355025
CCL26	6.4308	5.15871	1.40589	3.66937	0.00024315	0.000630916
SLC30A2	3.20598	5.15419	1.64637	3.13063	0.00174429	0.00394292
TMEM176A	35.5938	5.14551	0.678419	7.58456	3.34e-14	2.05e-13
IL18	71.0611	5.14512	0.488342	10.5359	5.9e-26	5.95e-25
SMKR1	3.18022	5.14436	1.63906	3.13861	0.0016975	0.00384406
PROKR2	3.17115	5.14084	1.64521	3.12473	0.0017797	0.00401837
NEK5	562.362	5.14026	0.182595	28.1511	2.32e-174	2.17e-172
CCDC70	3.15302	5.13334	1.70532	3.0102	0.00261079	0.00571446
ADAMTS1	7416.85	5.1323	0.0774842	66.2368	0	0
TMEM40	11.6463	5.12217	1.17463	4.36068	1.3e-05	3.96e-05
ASIC4	34.714	5.10593	0.677863	7.5324	4.98e-14	3.03e-13
SLCO4A1	3.08824	5.09647	1.66395	3.06287	0.00219225	0.00487026
ESRRG	11.4729	5.09128	1.17744	4.32404	1.53e-05	4.63e-05
PAX9	3.05913	5.08512	1.72779	2.94314	0.00324899	0.0069939
ZNF541	11.4149	5.08509	1.17587	4.32452	1.53e-05	4.62e-05
ASZ1	3.03814	5.07643	1.67836	3.02465	0.00248922	0.00546392
LRRTM1	50.6507	5.06115	0.56409	8.97223	2.91e-19	2.25e-18
MELTF	986.203	5.05889	0.152922	33.0815	5.48e-240	8.05e-238
ZNF860	61.178	5.04654	0.505203	9.98913	1.7e-23	1.57e-22
LRRC36	5.89911	5.03188	1.42324	3.5355	0.000407	0.00102205
PARM1	1956.01	5.03072	0.113645	44.267	0	0
PDGFRL	121.049	5.02973	0.365365	13.7663	4.06e-43	6.71e-42
C1R	428.153	5.02964	0.205402	24.4868	2.04e-132	1.19e-130
GYPE	5.87621	5.02709	1.43443	3.5046	0.000457291	0.00114037
SLC30A10	2.92469	5.01751	1.70347	2.94547	0.00322468	0.00694526
PKP2	1934.93	5.01713	0.112738	44.5027	0	0
CAVIN2	70.6868	5.01588	0.466076	10.7619	5.21e-27	5.44e-26
BNC1	336.168	5.01227	0.228785	21.9083	2.17e-106	9.49e-105
CYP2S1	507.518	5.00335	0.188151	26.5922	8.36e-156	6.11e-154
KRT33B	2.88055	4.99874	1.65944	3.01231	0.00259264	0.00567911
AADAC	5.76583	4.99712	1.44647	3.4547	0.000550903	0.0013581
TMPRSS11B	2.86696	4.99298	1.67861	2.97447	0.00293498	0.00637311
KCNS2	2.86386	4.99172	1.66283	3.00194	0.00268268	0.00586149
SALL3	31.0833	4.94296	0.69018	7.16184	7.96e-13	4.5e-12
SLC38A5	325.478	4.93932	0.224145	22.0363	1.29e-107	5.76e-106
RAB38	238.052	4.93864	0.268135	18.4185	9.33e-76	2.8e-74
SHOX2	10.2863	4.93136	1.19598	4.12327	3.74e-05	0.00010813
CSF3R	5.47523	4.91833	1.47478	3.33496	0.00085313	0.00203607
LRRC2	106.715	4.91319	0.37412	13.1326	2.14e-39	3.25e-38
EREG	2.7139	4.91259	1.70336	2.88405	0.00392593	0.00831223
GSDMA	2.70484	4.90849	1.68551	2.91217	0.00358932	0.00767032
GNAT3	2.70006	4.90638	1.81485	2.70346	0.00686225	0.0138739
FAM163B	10.1384	4.90197	1.19597	4.09874	4.15e-05	0.00011944
FRMPD2	2.68193	4.89815	1.72797	2.83462	0.004588	0.00957654
MYOT	2.67144	4.89337	1.71544	2.85254	0.0043372	0.00909036
CDH7	130.26	4.89158	0.338049	14.47	1.87e-47	3.37e-46
CLEC12A	2.6471	4.88173	1.78052	2.74174	0.00611149	0.012462
HAS2	178.581	4.87816	0.301006	16.2062	4.56e-59	1.04e-57
ADAMTSL1	594.321	4.87542	0.402184	12.1224	8.04e-34	1.03e-32
ALOX15	14.6633	4.85792	0.977191	4.97131	6.65e-07	2.35e-06
IQGAP2	2142.51	4.85481	0.104766	46.3393	0	0
SLC30A8	5.24502	4.85474	1.45289	3.34143	0.000833484	0.00199183
DAW1	14.4812	4.8447	0.989028	4.89844	9.66e-07	3.36e-06
GRHL3	72.641	4.84268	0.441883	10.9592	6e-28	6.5e-27
KYNU	14.47	4.83496	0.980514	4.93105	8.18e-07	2.86e-06
C6orf141	76.9392	4.83488	0.432202	11.1866	4.74e-29	5.33e-28
FRY	1155.39	4.82729	0.135519	35.6207	6.69e-278	1.32e-275
SHISA3	2.54272	4.81878	1.75686	2.74284	0.00609106	0.0124251
FGF20	2.54129	4.818	1.71611	2.80751	0.00499263	0.0103423
SP5	5.11786	4.81775	1.48746	3.2389	0.0011999	0.00279394
DNAH3	2.53079	4.8129	1.78298	2.69936	0.00694725	0.0140282
ADGRD1	9.52008	4.80919	1.23201	3.90352	9.48e-05	0.00026018
KCNJ13	5.04769	4.8013	1.46233	3.28332	0.00102591	0.00242054
GLYATL1	5.04149	4.79982	1.46469	3.27701	0.00104912	0.00247099
OLFM3	18.8008	4.79798	0.868184	5.52645	3.27e-08	1.3e-07
DSG3	2.49262	4.79426	1.78665	2.68339	0.00728808	0.0146414
RFX6	2.46996	4.78217	1.88237	2.54051	0.0110692	0.021474
GALNT6	283.367	4.78038	0.231964	20.6083	2.31e-94	8.75e-93
FRK	27.7222	4.77131	0.6955	6.86026	6.87e-12	3.66e-11
OR51E2	78.1855	4.76332	0.417267	11.4155	3.5e-30	4.07e-29
TMEM179	32.0138	4.75787	0.645577	7.36995	1.71e-13	1e-12
SV2B	18.3407	4.755	0.865505	5.4939	3.93e-08	1.56e-07
CTSV	353.019	4.7433	0.207173	22.8953	5.17e-116	2.54e-114
ANGPTL7	8.98107	4.73555	1.22593	3.86283	0.00011208	0.000304854
CYP2A6	26.9362	4.73001	0.704834	6.71081	1.94e-11	9.98e-11
PCDHGB3	2.39158	4.72868	1.81072	2.6115	0.00901468	0.017772
MOBP	2.38847	4.7269	1.75881	2.68756	0.00719753	0.0144865
AKR1D1	4.79708	4.71859	1.51454	3.11552	0.00183619	0.00413783
FGD4	186.836	4.71519	0.278708	16.918	3.31e-64	8.32e-63
RAB27B	62.1281	4.71345	0.46443	10.1489	3.35e-24	3.17e-23
FHOD3	351.25	4.71304	0.204688	23.0255	2.59e-117	1.3e-115
SECTM1	2.36104	4.71294	1.74711	2.69756	0.00698491	0.0140919
GCSAML	2.36104	4.71294	1.74711	2.69756	0.00698491	0.0140919
KLRK1	4.7619	4.7108	1.49112	3.15924	0.00158181	0.00360328
MAB21L2	31.0425	4.71036	0.662904	7.10563	1.2e-12	6.67e-12
PGM5	248.196	4.70989	0.242862	19.3933	8.8e-84	2.97e-82
OR2T8	4.72837	4.70044	1.48731	3.16037	0.0015757	0.00359088
BCO2	166.566	4.69377	0.286632	16.3756	2.86e-60	6.67e-59
RPP25	470.677	4.68339	0.182188	25.7064	9.9e-146	6.67e-144
PLPPR5	12.7879	4.65392	1.01751	4.57383	4.79e-06	1.54e-05
DGKG	12.703	4.64166	1.01056	4.59318	4.37e-06	1.41e-05
HMSD	2.23852	4.63229	1.9507	2.37468	0.017564	0.0326061
TMEM252	2.23709	4.63067	1.81901	2.54571	0.0109054	0.0211741
SLC47A1	100.732	4.62728	0.363802	12.7192	4.62e-37	6.52e-36
LXN	599.167	4.62646	0.1586	29.1706	4.57e-187	4.71e-185
GATA6	485.3	4.62188	0.173497	26.6395	2.37e-156	1.77e-154
SCYGR4	2.22039	4.62141	1.80856	2.55529	0.0106098	0.0206523
FYB1	2.20059	4.61049	1.78771	2.579	0.00990875	0.0193763
PDGFRA	319.577	4.60976	0.208413	22.1184	2.1e-108	9.51e-107
SLC27A2	2.19295	4.60632	1.7834	2.58289	0.00979763	0.0191822
TMPRSS11A	2.18985	4.60464	1.79252	2.56881	0.0102048	0.0199119
GPHA2	2.18842	4.6038	1.79269	2.5681	0.0102257	0.0199503
KCNIP4	69.828	4.59329	0.430782	10.6627	1.52e-26	1.57e-25
TRIM29	12.4016	4.59308	1.02518	4.48026	7.46e-06	2.35e-05
MS4A12	2.16552	4.59089	1.84556	2.48753	0.0128635	0.0246677
LHFPL4	2.16552	4.59089	1.84556	2.48753	0.0128635	0.0246677
CNGA1	8.13329	4.58395	1.23571	3.70957	0.00020761	0.000544619
CASP4	4.37121	4.58357	1.58929	2.88403	0.00392622	0.00831223
LRP2	276.026	4.57929	0.227707	20.1105	5.98e-90	2.16e-88
NRXN1	73.103	4.57749	0.414148	11.0528	2.13e-28	2.34e-27
NEBL	1185.8	4.57408	0.121907	37.521	0	0
ITGA9	494.617	4.57327	0.179926	25.4176	1.61e-142	1.03e-140
CRISPLD2	496.214	4.56943	0.176899	25.8307	4.01e-147	2.79e-145
AMDHD1	28.1919	4.56516	0.665837	6.85627	7.07e-12	3.76e-11
CHAT	35.867	4.55588	0.602282	7.56436	3.9e-14	2.38e-13
TCF21	39.6528	4.54795	0.566984	8.0213	1.05e-15	6.98e-15
TEK	1032.47	4.53671	0.13364	33.9473	1.34e-252	2.12e-250
CD200R1	15.6875	4.52784	0.8718	5.19367	2.06e-07	7.67e-07
CHST9	11.8018	4.52462	1.01305	4.46634	7.96e-06	2.49e-05
FLRT3	586.444	4.52222	0.162507	27.8279	2e-170	1.79e-168
TNFAIP8L3	11.6955	4.51949	1.0182	4.43871	9.05e-06	2.82e-05
MOXD1	2836.56	4.51264	0.0918598	49.1252	0	0
FLG	2.0461	4.50387	1.8396	2.44829	0.0143536	0.0271611
NPY4R2	2.04014	4.50034	1.87695	2.39768	0.0164991	0.030792
B4GALNT2	2.03083	4.49483	1.85622	2.42149	0.0154568	0.0290447
ELOVL2	329.881	4.49421	0.203248	22.1119	2.43e-108	1.1e-106
CACNG6	2.0294	4.4939	1.82257	2.4657	0.0136747	0.0260288
URAD	2.02177	4.48938	1.82896	2.45461	0.0141036	0.0267601
ERMN	30.4385	4.48616	0.629797	7.12318	1.05e-12	5.9e-12
LRRK1	57.2981	4.48605	0.45908	9.77181	1.49e-22	1.32e-21
A1CF	2.01581	4.48562	1.88631	2.37799	0.0174074	0.0323489
CLDN11	285.624	4.48028	0.227944	19.6552	5.22e-86	1.81e-84
GP5	2.0065	4.48006	1.88781	2.37316	0.0176367	0.0327336
CLSPN	175.26	4.47961	0.273795	16.3612	3.62e-60	8.43e-59
GYPA	1.99743	4.47452	1.88367	2.37543	0.0175286	0.032548
VWDE	18.894	4.47344	0.804733	5.5589	2.71e-08	1.09e-07
MTNR1A	1.98073	4.46333	2.0182	2.21154	0.0269988	0.0479985
RFPL2	1.9762	4.46035	2.03266	2.19434	0.0282108	0.0499827
GALNT12	119.585	4.45433	0.329109	13.5345	9.79e-42	1.57e-40
LAMC2	385.538	4.45428	0.187288	23.783	5.01e-125	2.71e-123
NOS1AP	107.874	4.4504	0.353788	12.5793	2.75e-36	3.79e-35
HSPB3	7.43782	4.45014	1.24502	3.57435	0.000351098	0.000889273
MT1E	59.1453	4.43771	0.481971	9.20743	3.34e-20	2.68e-19
ADAMTS18	158.206	4.42782	0.279339	15.851	1.38e-56	2.98e-55
BATF2	3.92899	4.41949	1.55968	2.83359	0.00460281	0.00960374
SCIN	10.9392	4.41891	1.0226	4.32124	1.55e-05	4.69e-05
TRDN	3.89237	4.40972	1.5722	2.80482	0.00503449	0.0104197
TMEM100	97.8271	4.4068	0.347	12.6997	5.93e-37	8.31e-36
NUP62CL	7.22754	4.40508	1.25893	3.49907	0.00046689	0.00116305
KCTD16	155.307	4.40159	0.278682	15.7943	3.41e-56	7.28e-55
ESR2	3.83942	4.3924	1.5661	2.80468	0.00503668	0.0104229
XRCC4	785.712	4.39163	0.143707	30.5597	4.21e-205	5.07e-203
ERICH3	1.88876	4.38701	1.92906	2.27417	0.0229555	0.0414024
ATP13A5	7.13581	4.38372	1.33132	3.29276	0.000992106	0.00234524
COL17A1	7.08158	4.3805	1.26253	3.46962	0.000521191	0.00128977
PROK1	35.4522	4.37464	0.580929	7.53042	5.06e-14	3.07e-13
PLPP3	2080.45	4.3741	0.101003	43.3066	0	0
COBL	7.10371	4.37115	1.2607	3.46723	0.000525853	0.00130031
USH1G	1.86442	4.37105	1.91951	2.27717	0.0227759	0.0411105
RNASE2	1.85822	4.36706	1.87786	2.32555	0.0200425	0.0366973
ACAN	7.08973	4.3624	1.26376	3.45191	0.000556624	0.00137178
XKRX	1.85058	4.36209	1.89685	2.29965	0.021468	0.0390199
RRM2	813.145	4.35462	0.158192	27.5274	8.25e-167	7.1e-165
CFAP47	20.9791	4.35392	0.759524	5.73243	9.9e-09	4.14e-08
SPATA31E1	1.83699	4.35309	1.89936	2.29188	0.0219126	0.0396987
H2BC7	1.83388	4.35097	1.9253	2.25989	0.0238282	0.042833
SLCO2B1	45.3077	4.35013	0.499528	8.70849	3.08e-18	2.29e-17
STEAP4	3.75184	4.35012	1.55573	2.79619	0.00517093	0.0106747
MX2	6.95027	4.34722	1.26219	3.44419	0.000572769	0.00140792
FAIM2	96.8978	4.33688	0.352423	12.3059	8.42e-35	1.11e-33
RUNX1T1	307.277	4.33259	0.20509	21.1253	4.66e-99	1.88e-97
PKP1	13.621	4.32307	0.917387	4.71237	2.45e-06	8.14e-06
COLEC10	3.65593	4.31723	1.62707	2.65337	0.00796927	0.0158737
CHRNA3	51.0674	4.31715	0.476042	9.06885	1.2e-19	9.45e-19
AHRR	6.78721	4.29444	1.27746	3.36171	0.000774606	0.00186104
ITGA8	305.471	4.29078	0.200228	21.4295	7.09e-102	2.96e-100
IQSEC3	26.7391	4.2848	0.636546	6.73134	1.68e-11	8.71e-11
EXOC3L4	6.72613	4.2829	1.28216	3.34037	0.00083668	0.00199858
ARSI	1337.81	4.27622	0.115719	36.9534	6.41e-299	1.44e-296
CLMP	691.378	4.27618	0.141317	30.2596	3.91e-201	4.57e-199
FRMPD1	33.2147	4.27479	0.580922	7.35863	1.86e-13	1.09e-12
SKA1	109.671	4.27441	0.332379	12.8601	7.55e-38	1.09e-36
CYP2A13	6.64594	4.27192	1.29592	3.29643	0.000979217	0.00231613
PRR9	3.55167	4.27158	1.57747	2.70786	0.0067719	0.0137084
CXCR6	3.54234	4.26941	1.56157	2.73405	0.00625603	0.0127294
MEOX1	39.7133	4.26851	0.524963	8.13108	4.25e-16	2.89e-15
SVOPL	13.1298	4.26836	0.947878	4.50306	6.7e-06	2.12e-05
MCM10	128.873	4.26604	0.295777	14.4232	3.7e-47	6.62e-46
CA3	123.837	4.24904	0.330207	12.8678	6.83e-38	9.92e-37
ARRDC4	615.651	4.24599	0.157941	26.8834	3.44e-159	2.68e-157
BRCA2	133.023	4.23988	0.291834	14.5284	8.01e-48	1.45e-46
COBLL1	1216.51	4.23356	0.11703	36.1749	1.51e-286	3.13e-284
HSD17B6	161.136	4.22667	0.264232	15.9961	1.36e-57	3.01e-56
OR2W3	19.2179	4.22309	0.736455	5.73435	9.79e-09	4.1e-08
MOCOS	104.883	4.20922	0.329403	12.7783	2.17e-37	3.08e-36
NT5C1A	12.5514	4.20097	0.940906	4.46482	8.01e-06	2.51e-05
ESCO2	78.7051	4.19834	0.386246	10.8696	1.61e-27	1.72e-26
RGS9BP	9.3941	4.1848	1.11136	3.76547	0.000166239	0.000442406
CYP2F1	3.35006	4.18322	1.62539	2.57367	0.0100627	0.0196535
BHLHE41	96.5789	4.18037	0.338312	12.3566	4.49e-35	5.96e-34
MCC	2160.01	4.17748	0.0981179	42.5761	0	0
AQP1	1923.71	4.17289	0.0988643	42.2082	0	0
DEPTOR	77.0974	4.16158	0.37246	11.1732	5.52e-29	6.19e-28
SH2D4A	366.042	4.15956	0.181754	22.8857	6.45e-116	3.16e-114
NAALAD2	584.529	4.15818	0.148002	28.0953	1.12e-173	1.03e-171
CCDC33	21.225	4.13669	0.687923	6.0133	1.82e-09	8.04e-09
CD36	51.1762	4.13242	0.463845	8.90905	5.15e-19	3.95e-18
TACR3	3.24462	4.13231	1.67161	2.47205	0.013434	0.0256219
SCTR	3.22287	4.12473	1.60068	2.57687	0.00997001	0.0194867
RARB	330.474	4.12266	0.187687	21.9657	6.13e-107	2.72e-105
PCDH11Y	3.21524	4.12177	1.59695	2.58103	0.00985056	0.0192718
BICDL1	57.0197	4.11956	0.428912	9.60469	7.64e-22	6.58e-21
RGN	3.20656	4.11466	1.63335	2.51916	0.0117634	0.0227389
STXBP6	995.043	4.11408	0.119168	34.5235	3.56e-261	6.12e-259
ACE	17.8285	4.11359	0.758554	5.42293	5.86e-08	2.29e-07
PRSS8	11.8687	4.10795	0.943382	4.35449	1.33e-05	4.07e-05
C1orf226	283.327	4.1066	0.209924	19.5623	3.24e-85	1.11e-83
FRMD4B	480.27	4.10126	0.15989	25.6505	4.18e-145	2.79e-143
S1PR1	484.811	4.09682	0.162787	25.1668	9.26e-140	5.73e-138
MMP28	97.1556	4.08843	0.330034	12.3879	3.04e-35	4.06e-34
PCDHGA6	8.84058	4.08672	1.09481	3.73282	0.000189346	0.000499463
TRIM58	565.413	4.08264	0.152346	26.7985	3.36e-158	2.57e-156
SLC17A9	302.943	4.07674	0.193365	21.0831	1.14e-98	4.55e-97
STC1	317.662	4.06418	0.1936	20.9927	7.65e-98	3.02e-96
NPAP1	25.9098	4.06376	0.625897	6.4927	8.43e-11	4.15e-10
WFDC1	176.322	4.05903	0.253628	16.0039	1.2e-57	2.66e-56
ABCG2	14.2855	4.05002	0.840012	4.82138	1.43e-06	4.87e-06
APOA1	34.1597	4.04197	0.540578	7.47713	7.6e-14	4.56e-13
KRT19	2403.38	4.03994	0.0948195	42.6066	0	0
NXPH2	145.05	4.03935	0.265478	15.2154	2.8e-52	5.51e-51
MUC3A	5.67209	4.0388	1.33717	3.02041	0.00252431	0.00553718
EXO1	145.092	4.03612	0.271896	14.8444	7.57e-50	1.42e-48
MKI67	816.376	4.02849	0.135392	29.7542	1.53e-194	1.72e-192
C3	299.362	4.02756	0.192084	20.9678	1.29e-97	5.08e-96
NPY4R	3.00923	4.02418	1.65979	2.42451	0.015329	0.0288414
STMN2	1318.65	4.02185	0.468436	8.5857	9.03e-18	6.59e-17
MS4A6A	8.42398	4.01897	1.05833	3.79748	0.000146176	0.000392246
MAB21L3	8.36754	4.01839	1.08399	3.70705	0.000209687	0.000549443
C2CD4D	2.98969	4.01455	1.66052	2.41765	0.0156213	0.0293093
E2F2	47.3583	4.00316	0.455435	8.78975	1.5e-18	1.13e-17
ATP8B4	22.3753	3.99877	0.714776	5.59444	2.21e-08	8.96e-08
PABPC4L	1412.16	3.99375	0.114784	34.7935	3.05e-265	5.41e-263
CD1D	52.6414	3.99288	0.436377	9.15007	5.69e-20	4.53e-19
PCDH10	5997.18	3.98526	0.0820133	48.5929	0	0
ST3GAL6	51.9942	3.98134	0.437659	9.0969	9.29e-20	7.33e-19
DKK1	395.347	3.97383	0.185707	21.3984	1.38e-101	5.73e-100
SLC7A2	92.0963	3.96487	0.325625	12.1762	4.16e-34	5.4e-33
ZNF732	37.7752	3.96413	0.514168	7.7098	1.26e-14	7.94e-14
CDC45	134.864	3.95982	0.276773	14.3071	1.98e-46	3.48e-45
OGFRL1	5136.87	3.95688	0.104029	38.0362	0	0
GBP4	10.8269	3.95593	0.937572	4.21933	2.45e-05	7.27e-05
CNGA4	2.83532	3.92976	1.67705	2.34326	0.0191162	0.0351566
ENPP2	337.738	3.92453	0.178906	21.9362	1.17e-106	5.17e-105
S1PR3	1351.14	3.92401	0.112509	34.8772	1.65e-266	2.99e-264
CDCA2	112.577	3.91223	0.297351	13.157	1.55e-39	2.37e-38
FAM20A	34.163	3.91072	0.538264	7.26544	3.72e-13	2.15e-12
RASD1	62.1758	3.90054	0.423276	9.21511	3.11e-20	2.5e-19
ZNF367	62.5814	3.90049	0.399645	9.75991	1.67e-22	1.48e-21
ITPR1	1631.91	3.89247	0.102677	37.9099	0	0
DNAH11	46.4786	3.8883	0.473318	8.21499	2.12e-16	1.46e-15
CNNM1	46.2779	3.8861	0.453407	8.57089	1.03e-17	7.48e-17
TFPI2	131.509	3.88146	0.288694	13.4449	3.3e-41	5.25e-40
RAP1GAP2	58.7293	3.87037	0.403114	9.60119	7.9e-22	6.79e-21
SFRP5	25.3741	3.8659	0.61739	6.26167	3.81e-10	1.78e-09
ROR2	477.123	3.86518	0.153797	25.1318	2.24e-139	1.38e-137
SLC9A2	7.57722	3.86464	1.09847	3.51821	0.000434464	0.00108663
NMU	5.00971	3.85773	1.371	2.81382	0.00489574	0.0101664
PKMYT1	98.477	3.85599	0.307944	12.5217	5.68e-36	7.75e-35
KCNJ3	10.1132	3.8557	0.956051	4.03294	5.51e-05	0.000155582
PCDHAC2	199.274	3.85465	0.220845	17.4541	3.21e-68	8.55e-67
CSMD3	60.4798	3.85456	0.416343	9.25814	2.08e-20	1.69e-19
ALDH1L1	7.58538	3.84922	1.08984	3.53193	0.000412546	0.00103485
CLEC14A	2.68382	3.84692	1.67372	2.29843	0.0215375	0.0391243
LRRC55	118.026	3.84685	0.280735	13.7028	9.77e-43	1.6e-41
PHYHD1	97.642	3.84548	0.327095	11.7565	6.54e-32	7.96e-31
GOLGA6B	2.67929	3.84479	1.67171	2.29992	0.0214527	0.0390044
KLF5	374.445	3.84248	0.192198	19.9923	6.43e-89	2.29e-87
LAMA4	1087.89	3.84188	0.118252	32.489	1.53e-231	2.13e-229
C4orf50	9.921	3.84115	0.980479	3.91763	8.94e-05	0.000246296
FSTL5	12.3187	3.83058	0.891911	4.2948	1.75e-05	5.26e-05
PLPPR4	19.7908	3.82807	0.681766	5.61493	1.97e-08	8e-08
SEMA3E	291.424	3.82339	0.194762	19.631	8.4e-86	2.89e-84
AKR1B10	44.1934	3.81281	0.499236	7.6373	2.22e-14	1.38e-13
GATM	181.939	3.79313	0.229704	16.5132	2.95e-61	7.05e-60
ART4	16.9859	3.78945	0.75364	5.02819	4.95e-07	1.77e-06
GAS7	1421.12	3.77523	0.103984	36.3058	1.31e-288	2.79e-286
SIM2	2.56414	3.77329	1.71759	2.19686	0.0280307	0.0496965
KCNQ5	274.946	3.77041	0.193272	19.5083	9.34e-85	3.19e-83
PRKCQ	33.405	3.76615	0.512455	7.34922	1.99e-13	1.17e-12
PZP	9.4293	3.75498	0.966921	3.88345	0.000102987	0.000281303
HTRA4	2.53255	3.75271	1.69447	2.21468	0.0267824	0.0476505
COL20A1	16.601	3.75189	0.756912	4.95684	7.16e-07	2.53e-06
SH3RF2	447.213	3.74767	0.152144	24.6324	5.68e-134	3.35e-132
PCDH17	148.178	3.74742	0.267434	14.0125	1.31e-44	2.22e-43
IGSF23	4.65064	3.74497	1.40679	2.66207	0.00776614	0.0155169
MYLK3	51.7347	3.7415	0.9907	3.77662	0.000158972	0.000423977
CES4A	49.424	3.74097	0.429996	8.70001	3.32e-18	2.46e-17
TRHDE	81.6169	3.73637	0.340786	10.964	5.69e-28	6.17e-27
TK1	499.548	3.73447	0.150736	24.7749	1.67e-135	1.01e-133
FERMT1	182.01	3.7321	0.233545	15.9802	1.76e-57	3.87e-56
ERCC6L	55.7272	3.72726	0.400541	9.30557	1.33e-20	1.09e-19
BIRC3	79.4101	3.72655	0.357295	10.4299	1.81e-25	1.79e-24
PRSS51	4.6076	3.71776	1.38195	2.69023	0.00714032	0.0143767
ADAMTSL5	101.017	3.70695	0.30696	12.0763	1.41e-33	1.8e-32
ZC3HAV1	587.706	3.70624	0.14376	25.7807	1.46e-146	1.01e-144
RTL9	29.8858	3.70611	0.546402	6.78275	1.18e-11	6.18e-11
FAM72A	13.7519	3.70555	0.803494	4.6118	3.99e-06	1.3e-05
OSMR	878.686	3.70427	0.124582	29.7335	2.84e-194	3.16e-192
GABRA2	396.093	3.70363	0.162106	22.8469	1.57e-115	7.61e-114
CACNA1D	121.053	3.7008	0.28214	13.1169	2.64e-39	3.98e-38
IGF1	9.10673	3.70066	0.974221	3.79858	0.000145527	0.000390828
PDE3B	428.839	3.69701	0.158195	23.3699	8.65e-121	4.49e-119
PCLAF	47.7038	3.69131	0.443176	8.32922	8.14e-17	5.71e-16
TMCC3	398.177	3.68218	0.170829	21.5548	4.77e-103	2.01e-101
ADGRF4	6.76479	3.68205	1.16173	3.16946	0.00152721	0.00349219
HRNR	4.49527	3.68096	1.41682	2.59805	0.00937542	0.018427
CXCR2	8.97852	3.67469	0.967461	3.79829	0.000145699	0.000391224
MRC1	4.53628	3.6745	1.38756	2.64817	0.00809277	0.0160979
PACSIN1	11.1537	3.6695	0.883803	4.15194	3.3e-05	9.62e-05
UNC5A	8.96193	3.66798	0.982308	3.73404	0.00018843	0.000497372
DIO3	33.0236	3.64437	0.505111	7.21499	5.39e-13	3.09e-12
SEC16B	4.4153	3.64386	1.45171	2.51004	0.0120716	0.0232874
FMO4	78.6707	3.63306	0.328429	11.0619	1.92e-28	2.11e-27
GCOM1	8.75141	3.62988	0.965818	3.75835	0.000171041	0.000453917
SLC25A10	15.2178	3.61863	0.738271	4.90149	9.51e-07	3.31e-06
PLEKHA7	904.576	3.61732	0.127868	28.2895	4.65e-176	4.44e-174
TOGARAM2	30.0998	3.61723	0.573553	6.3067	2.85e-10	1.35e-09
MCUB	140.436	3.61649	0.256589	14.0945	4.11e-45	7.05e-44
MUC12	6.42136	3.61213	1.16135	3.11029	0.00186904	0.00420422
SLC1A1	648.021	3.60966	0.141008	25.5989	1.57e-144	1.04e-142
IL6R	536.907	3.60482	0.142387	25.3171	2.07e-141	1.29e-139
ETV7	6.38319	3.60464	1.16859	3.0846	0.00203825	0.00454751
FAP	250.879	3.6012	0.194519	18.5134	1.61e-76	4.92e-75
MUC5B	6.43108	3.60009	1.11961	3.21547	0.00130229	0.00301413
THY1	8337.02	3.59779	0.0855295	42.0648	0	0
LLGL2	191.408	3.59209	0.226575	15.8539	1.32e-56	2.85e-55
P2RX6	72.0376	3.58377	0.353847	10.128	4.15e-24	3.91e-23
NOSTRIN	12.6918	3.56538	0.831245	4.2892	1.79e-05	5.38e-05
RNF207	424.976	3.56216	0.155258	22.9435	1.71e-116	8.46e-115
TINAGL1	1864.05	3.56107	0.0942008	37.8029	0	0
IGFBP5	7955.69	3.55515	0.094342	37.6836	0	0
LTBP1	16078.7	3.55244	0.0711276	49.9447	0	0
CRYM	29.1245	3.55233	0.541586	6.55912	5.41e-11	2.7e-10
SOX5	428.42	3.5469	0.155625	22.7913	5.59e-115	2.68e-113
CCDC141	4.16671	3.54194	1.44117	2.45768	0.0139837	0.0265544
IL18R1	129.767	3.53997	0.254835	13.8912	7.16e-44	1.2e-42
TRPV4	14.5255	3.53654	0.78009	4.5335	5.8e-06	1.85e-05
SLC16A14	180.322	3.53219	0.222262	15.892	7.2e-57	1.57e-55
ALPK3	546.564	3.52922	0.152871	23.0862	6.37e-118	3.24e-116
NKX3-1	38.872	3.52839	0.4551	7.75298	8.98e-15	5.69e-14
EYA2	4.05274	3.52651	1.42043	2.48271	0.0130385	0.0249614
CELA2A	6.04535	3.52089	1.21196	2.90512	0.0036711	0.00782956
HAPLN3	869.247	3.52025	0.128428	27.4102	2.07e-165	1.74e-163
SLC4A4	207.722	3.50609	0.217862	16.0932	2.85e-58	6.39e-57
C1QTNF7	28.2422	3.50565	0.557539	6.28773	3.22e-10	1.52e-09
GCNT1	411.286	3.50312	0.158624	22.0844	4.46e-108	1.99e-106
RETREG1	72.6501	3.50175	0.346564	10.1042	5.29e-24	4.97e-23
OGN	24.0122	3.49602	0.610507	5.72642	1.03e-08	4.28e-08
CCDC168	4.0473	3.49411	1.4154	2.46863	0.0135631	0.0258346
MYBL2	445.83	3.48532	0.145852	23.8963	3.35e-126	1.84e-124
ARHGAP22	57.4859	3.48474	0.393974	8.84512	9.14e-19	6.96e-18
APOBEC3G	41.8088	3.48451	0.443529	7.85633	3.96e-15	2.55e-14
RAC2	31.7691	3.48391	0.508852	6.84661	7.56e-12	4.02e-11
FZD5	170.812	3.48368	0.23675	14.7146	5.19e-49	9.57e-48
PLN	173.116	3.48279	0.257722	13.5138	1.3e-41	2.08e-40
PDE6A	11.8542	3.48197	0.853705	4.07866	4.53e-05	0.000129365
GPR183	47.4715	3.47596	0.436071	7.97108	1.57e-15	1.04e-14
TLE2	55.3135	3.47356	0.393628	8.82448	1.1e-18	8.34e-18
PBK	130.094	3.46926	0.254419	13.636	2.45e-42	3.96e-41
IRAK3	13.7589	3.46813	0.771929	4.49282	7.03e-06	2.22e-05
C2CD6	3.90589	3.46777	1.44861	2.39385	0.0166724	0.0310902
KIF11	400.164	3.46161	0.1547	22.3763	6.69e-111	3.06e-109
SEZ6L	13.8261	3.45706	0.792509	4.36217	1.29e-05	3.94e-05
TRIM71	180.925	3.45449	0.233296	14.8074	1.31e-49	2.46e-48
PLAC8	25.2861	3.45213	0.555604	6.2133	5.19e-10	2.4e-09
SHCBP1	290.168	3.44909	0.182428	18.9066	1.01e-79	3.18e-78
NUDT4B	11.6686	3.44755	0.81949	4.20694	2.59e-05	7.66e-05
PLAAT1	116.51	3.44632	0.275794	12.496	7.85e-36	1.07e-34
KCNE3	21.424	3.43982	0.643564	5.34496	9.04e-08	3.48e-07
MYL7	1057.17	3.43982	0.120069	28.6487	1.66e-180	1.64e-178
STYK1	15.4842	3.43562	0.717106	4.79095	1.66e-06	5.62e-06
IQGAP3	293.179	3.43452	0.186397	18.4258	8.15e-76	2.46e-74
ST3GAL1	1441.02	3.43369	0.0974671	35.2292	7.15e-272	1.36e-269
WFDC3	25.0383	3.42975	0.60911	5.63076	1.79e-08	7.32e-08
PKDCC	2082.31	3.42182	0.0875196	39.0977	0	0
KLHL31	88.539	3.4173	0.681712	5.01282	5.36e-07	1.92e-06
GPR20	45.6495	3.41377	0.420103	8.12603	4.44e-16	3.01e-15
RBP5	45.3766	3.40858	0.423354	8.05137	8.19e-16	5.51e-15
ZNF560	20.7755	3.40703	0.639311	5.32923	9.86e-08	3.79e-07
RAPGEF5	13.2603	3.40586	0.759903	4.48196	7.4e-06	2.33e-05
TMEM125	9.45852	3.40371	0.919972	3.69979	0.000215777	0.000564576
GCNT2	60.8649	3.39626	0.89428	3.79775	0.000146014	0.000391943
CIT	195.952	3.39625	0.211014	16.0949	2.77e-58	6.23e-57
TMEM236	28.1889	3.39186	0.524568	6.46601	1.01e-10	4.92e-10
PLEKHN1	18.755	3.3918	0.659064	5.14639	2.66e-07	9.78e-07
PRSS12	93.3719	3.38931	0.313254	10.8197	2.78e-27	2.94e-26
DTL	170.253	3.38506	0.224115	15.1041	1.52e-51	2.96e-50
MTSS1	223.039	3.37816	0.202507	16.6817	1.78e-62	4.33e-61
GLRA3	3.67697	3.37708	1.45602	2.31939	0.0203736	0.037253
APOBEC3D	3.7734	3.37697	1.49229	2.26295	0.0236391	0.042545
TENT5A	528.681	3.3742	0.137094	24.6124	9.31e-134	5.45e-132
GPBAR1	22.0772	3.36984	0.634079	5.31454	1.07e-07	4.09e-07
ESPL1	186.17	3.36457	0.21735	15.48	4.74e-54	9.7e-53
PLD1	612.899	3.36085	0.128482	26.1581	7.97e-151	5.67e-149
FBXO43	10.9811	3.35922	0.854915	3.92931	8.52e-05	0.0002354
LIN7A	652.084	3.3337	0.146542	22.7491	1.46e-114	6.98e-113
DOK7	12.6134	3.33059	0.766755	4.34375	1.4e-05	4.25e-05
GABRA1	5.39865	3.32873	1.23146	2.70309	0.00686988	0.0138876
ARHGEF3	1137.64	3.32715	0.103396	32.1788	3.5e-227	4.79e-225
GRM8	50.1787	3.32545	0.428094	7.76803	7.97e-15	5.07e-14
PPP1R3C	709.988	3.31891	0.122386	27.1184	5.97e-162	4.75e-160
PDLIM3	724.12	3.31851	0.122669	27.0525	3.56e-161	2.81e-159
GRIN2A	60.9248	3.31747	0.367983	9.0153	1.96e-19	1.53e-18
OSBPL10	731.426	3.31002	0.128346	25.7898	1.15e-146	8e-145
TSPAN13	1105.33	3.30811	0.115543	28.631	2.76e-180	2.71e-178
ANPEP	85.6807	3.30716	0.320183	10.329	5.21e-25	5.08e-24
SLC7A7	269.589	3.30356	0.175993	18.771	1.31e-78	4.08e-77
VGF	23.1277	3.30311	0.570536	5.78948	7.06e-09	2.99e-08
SPATC1	3.51537	3.29941	1.4593	2.26095	0.0237621	0.0427285
HS6ST2	1228.17	3.29863	0.100927	32.6833	2.7e-234	3.86e-232
ORC1	88.3828	3.29475	0.298122	11.0517	2.15e-28	2.36e-27
ICA1	89.9562	3.29226	0.29226	11.2648	1.96e-29	2.22e-28
MANSC1	113.083	3.29206	0.274158	12.0079	3.23e-33	4.09e-32
FGD3	5.27689	3.29093	1.20928	2.72139	0.00650071	0.0131924
POLQ	117.671	3.29069	0.272186	12.0899	1.19e-33	1.53e-32
MFGE8	12496.3	3.2868	0.0686804	47.8565	0	0
SYNPO2	965.745	3.28174	0.120775	27.1723	1.38e-162	1.12e-160
BAMBI	5270.41	3.2813	0.109638	29.9287	8.34e-197	9.56e-195
DNAJC22	22.5034	3.26987	0.579751	5.64013	1.7e-08	6.96e-08
KNL1	223.872	3.26902	0.192484	16.9833	1.09e-64	2.76e-63
KCNJ8	90.0454	3.26832	0.300405	10.8797	1.44e-27	1.54e-26
ANGPTL2	944.894	3.26029	0.109753	29.7058	6.45e-194	7.14e-192
PHKA1	432.467	3.2571	0.143319	22.7262	2.47e-114	1.17e-112
PLA2G4A	18.9138	3.25012	0.632731	5.13666	2.8e-07	1.03e-06
IGFBP6	248.533	3.2469	0.190614	17.0339	4.6e-65	1.17e-63
KIF26A	226.864	3.24488	0.199266	16.2842	1.28e-59	2.95e-58
ESRP1	21.964	3.23483	0.60292	5.36527	8.08e-08	3.12e-07
DDIAS	79.5892	3.23449	0.324336	9.97266	2.01e-23	1.85e-22
C1orf21	1008.09	3.23378	0.108381	29.8372	1.29e-195	1.46e-193
PTPN6	20.2167	3.22366	0.627368	5.13839	2.77e-07	1.02e-06
P2RX7	10.0808	3.22307	0.851029	3.78727	0.000152314	0.000407633
CTSC	1307.62	3.21971	0.109068	29.5203	1.58e-191	1.7e-189
CNKSR2	43.6905	3.2187	0.409276	7.86439	3.71e-15	2.4e-14
CATSPER3	5.00761	3.21188	1.2523	2.56479	0.0103238	0.0201247
GSAP	16.7238	3.20731	0.659226	4.86526	1.14e-06	3.95e-06
KIF20A	288.054	3.20576	0.208078	15.4065	1.48e-53	3e-52
SPC24	91.2597	3.19885	0.320498	9.98088	1.85e-23	1.71e-22
ASPM	295.715	3.19793	0.17143	18.6544	1.16e-77	3.6e-76
COL4A6	628.689	3.19664	0.124168	25.7445	3.72e-146	2.52e-144
LIN28A	44.7578	3.19486	0.401332	7.96066	1.71e-15	1.13e-14
SARM1	655.804	3.1907	0.132342	24.1095	1.99e-128	1.11e-126
TMEM184A	26.2978	3.18326	0.541076	5.8832	4.02e-09	1.74e-08
EPHA6	21.2851	3.17586	0.590681	5.37661	7.59e-08	2.94e-07
KDR	2662.44	3.17347	0.0843292	37.632	0	0
FGD6	859.102	3.17293	0.12352	25.6875	1.61e-145	1.08e-143
ASF1B	102.846	3.17004	0.278104	11.3987	4.24e-30	4.92e-29
BRIP1	230.365	3.16196	0.189307	16.7028	1.25e-62	3.05e-61
TMEM176B	37.2374	3.15949	0.453384	6.96867	3.2e-12	1.74e-11
CEP55	207.103	3.15943	0.197961	15.9599	2.43e-57	5.33e-56
GSDME	1094.14	3.15743	0.104347	30.259	3.97e-201	4.61e-199
MGARP	37.0659	3.1458	0.441395	7.12695	1.03e-12	5.75e-12
TSPYL5	231.323	3.14338	0.191997	16.372	3.03e-60	7.06e-59
MYO7B	137.472	3.1398	0.244178	12.8587	7.69e-38	1.11e-36
NCAPG	279.535	3.13558	0.174149	18.0051	1.78e-72	5.07e-71
APOBEC3B	12.8055	3.13509	0.744874	4.20889	2.57e-05	7.6e-05
NFATC2	160.861	3.1264	0.228988	13.6531	1.93e-42	3.14e-41
CKAP2L	131.867	3.12591	0.243897	12.8165	1.33e-37	1.91e-36
RAB17	7.93258	3.1252	0.939967	3.3248	0.000884821	0.00210766
MAG	4.75494	3.12449	1.28022	2.4406	0.0146631	0.0276948
EPAS1	2424.88	3.12373	0.10192	30.6487	2.75e-206	3.37e-204
KCNK6	860.556	3.12083	0.113882	27.4039	2.46e-165	2.05e-163
KIF14	116.724	3.11993	0.263771	11.8282	2.79e-32	3.42e-31
DENND2D	15.5762	3.11143	0.739027	4.21016	2.55e-05	7.56e-05
TMEM88	454.243	3.11077	0.145849	21.3287	6.14e-101	2.52e-99
MYRF	1835.74	3.10994	0.0909544	34.1923	3.15e-256	5.09e-254
CYP2A7	4.74249	3.10944	1.21748	2.55401	0.0106491	0.0207162
LUM	36505.7	3.10792	0.0635392	48.9134	0	0
CACNB4	86.3925	3.10559	0.303479	10.2333	1.41e-24	1.35e-23
RBM47	267.31	3.10126	0.175415	17.6795	6.03e-70	1.65e-68
SAMD12	247.75	3.09951	0.18834	16.457	7.47e-61	1.76e-59
KCNC4	540.982	3.09774	0.130653	23.7096	2.87e-124	1.54e-122
SAMD3	40.4239	3.09755	0.432691	7.15881	8.14e-13	4.59e-12
FANCI	287.283	3.09701	0.180101	17.196	2.85e-66	7.34e-65
CARD6	17.1843	3.09693	0.636981	4.8619	1.16e-06	4.01e-06
PPP2R2B	716.602	3.0924	0.115722	26.7226	2.57e-157	1.95e-155
CENPE	306.753	3.08719	0.17404	17.7384	2.12e-70	5.86e-69
SLITRK6	7.75968	3.08295	0.973968	3.16535	0.00154894	0.00353688
SKA3	118.641	3.08213	0.260727	11.8213	3.03e-32	3.71e-31
ZWINT	318.612	3.07543	0.170071	18.0832	4.33e-73	1.25e-71
HLA-DQB1	21.5689	3.07257	0.569468	5.3955	6.83e-08	2.66e-07
TFPI	892.061	3.0681	0.11422	26.8613	6.23e-159	4.82e-157
CSRP2	4554.1	3.0665	0.0876508	34.9855	3.74e-268	6.88e-266
TCF19	169.29	3.065	0.219884	13.9391	3.66e-44	6.17e-43
STRIP2	82.2621	3.06139	0.311157	9.83871	7.67e-23	6.88e-22
CYP11A1	16.6708	3.05136	0.649939	4.69484	2.67e-06	8.84e-06
PARP9	170.86	3.04837	0.211117	14.4392	2.93e-47	5.26e-46
SLC7A14	78.4541	3.04638	0.310042	9.82572	8.72e-23	7.81e-22
HJURP	214.768	3.04606	0.190372	16.0006	1.27e-57	2.8e-56
FANCD2	150.298	3.04331	0.277557	10.9646	5.65e-28	6.13e-27
NEIL3	36.0732	3.04164	0.45187	6.73123	1.68e-11	8.72e-11
SLC18A3	23.9593	3.04062	0.562139	5.40903	6.34e-08	2.47e-07
C1QL2	4.55177	3.03969	1.24138	2.44864	0.0143397	0.0271474
HPSE	13.4708	3.03899	0.718554	4.22931	2.34e-05	6.96e-05
NLRC5	97.5013	3.0371	0.287516	10.5632	4.41e-26	4.46e-25
HSPB6	37.4339	3.03635	0.434337	6.99077	2.73e-12	1.49e-11
CALB2	52.6411	3.03227	0.377373	8.03521	9.34e-16	6.25e-15
CCDC15	26.8045	3.0306	0.530773	5.70978	1.13e-08	4.69e-08
FGF10	5.89273	3.02376	1.1294	2.67732	0.00742141	0.0148778
C6orf132	95.4346	3.02299	0.284645	10.6202	2.4e-26	2.44e-25
NCAPH	128.926	3.02017	0.250648	12.0494	1.95e-33	2.48e-32
SPC25	62.2045	3.01676	0.346362	8.70983	3.04e-18	2.26e-17
CCDC69	116.814	3.01104	0.255064	11.805	3.68e-32	4.49e-31
BUB1	292.347	3.00851	0.181027	16.6191	5.07e-62	1.23e-60
GADD45G	145.693	3.00682	0.242282	12.4104	2.29e-35	3.07e-34
BAIAP2L1	357.117	3.00608	0.166852	18.0164	1.45e-72	4.14e-71
ITGA6	879.334	3.00403	0.115868	25.9264	3.36e-148	2.36e-146
DSCC1	74.6853	3.00194	0.322525	9.30761	1.31e-20	1.07e-19
SPTLC3	457.94	3.00108	0.137716	21.7918	2.77e-105	1.2e-103
ANLN	580.568	2.99611	0.146282	20.4818	3.13e-93	1.18e-91
HERC6	30.6996	2.99178	0.470038	6.36497	1.95e-10	9.38e-10
EZR	2713.75	2.99128	0.0836177	35.7733	2.88e-280	5.81e-278
LIFR	2272.93	2.98968	0.101177	29.5489	6.79e-192	7.37e-190
PLPPR1	15.9175	2.98955	0.682501	4.38028	1.19e-05	3.64e-05
OSBPL3	226.788	2.98917	0.199073	15.0154	5.82e-51	1.12e-49
AURKB	173.296	2.9886	0.218819	13.6578	1.81e-42	2.95e-41
ARHGAP11B	4.35921	2.98388	1.22938	2.42714	0.0152184	0.02865
APBB1IP	5.76363	2.97417	1.10771	2.68497	0.00725365	0.0145823
IL6ST	11238	2.97356	0.0863864	34.4216	1.2e-259	2.02e-257
CLEC2A	4.34548	2.9713	1.25908	2.3599	0.0182799	0.0338264
TRIM38	198.663	2.97047	0.197955	15.0058	6.73e-51	1.29e-49
ARHGAP30	8.62167	2.96303	0.873479	3.39222	0.000693293	0.00167865
KIF15	109.614	2.96099	0.321354	9.21409	3.14e-20	2.52e-19
MCOLN2	14.2396	2.96022	0.722534	4.097	4.19e-05	0.000120254
C7	14.2796	2.95747	0.731883	4.04091	5.32e-05	0.000150598
ERICH5	62.8307	2.95442	0.330889	8.92871	4.31e-19	3.32e-18
SOX6	350.312	2.95109	0.158265	18.6466	1.35e-77	4.15e-76
LRFN5	147.786	2.94714	0.226601	13.0058	1.13e-38	1.68e-37
CES3	8.52771	2.94625	0.891237	3.3058	0.000947053	0.00224372
KIF18B	165.041	2.94591	0.218382	13.4897	1.8e-41	2.87e-40
ZNF90	18.3735	2.94201	0.627192	4.69077	2.72e-06	9.01e-06
NUDT4	3056.98	2.94173	0.0994259	29.5871	2.19e-192	2.41e-190
LIPI	7.03095	2.94034	0.992372	2.96294	0.00304714	0.00659453
LIPG	617.111	2.93891	0.121484	24.1917	2.72e-129	1.54e-127
AMPD3	60.8934	2.9383	0.337622	8.70291	3.23e-18	2.4e-17
PLOD2	5066.33	2.92954	0.0718429	40.777	0	0
CARD11	230.538	2.92946	0.181745	16.1185	1.89e-58	4.26e-57
NDC80	171.228	2.92844	0.215359	13.598	4.12e-42	6.66e-41
PODXL	1318.1	2.9206	0.0987242	29.5834	2.44e-192	2.66e-190
IRS4	5.53417	2.91914	1.1409	2.55862	0.0105088	0.0204655
PYGM	37.7189	2.91761	0.434059	6.72169	1.8e-11	9.29e-11
KIFC1	219.415	2.91524	0.202939	14.3651	8.57e-47	1.52e-45
CENPU	173.802	2.9144	0.209539	13.9086	5.62e-44	9.41e-43
KMO	4.1972	2.91305	1.27329	2.28781	0.0221486	0.0400857
P4HA3	254.18	2.9103	0.186338	15.6185	5.45e-55	1.14e-53
ABHD12B	4.18647	2.90989	1.2621	2.3056	0.021133	0.0384887
SCN3A	5.52978	2.90714	1.0775	2.69804	0.0069749	0.014077
NIBAN1	4043.05	2.9042	0.0930664	31.2057	8.91e-214	1.15e-211
TOP2A	1203.7	2.90202	0.114228	25.4054	2.2e-142	1.39e-140
CCDC38	8.19024	2.89962	0.939741	3.08555	0.00203175	0.00453426
MRO	11.0581	2.89874	0.788403	3.67672	0.000236248	0.000614557
XRCC2	125.196	2.89396	0.239151	12.101	1.04e-33	1.34e-32
GALNT14	24.5072	2.88716	0.576655	5.00675	5.54e-07	1.97e-06
WDR76	123.755	2.87305	0.239393	12.0014	3.5e-33	4.4e-32
ADAMTSL3	35.4581	2.87149	0.450543	6.37341	1.85e-10	8.9e-10
DEPDC1	190.144	2.87115	0.196868	14.5841	3.54e-48	6.47e-47
C1QTNF2	12.2608	2.86944	0.765563	3.74814	0.00017815	0.00047147
NFASC	273.01	2.86891	0.182874	15.6878	1.83e-55	3.86e-54
ADAMTS3	241.213	2.8661	0.184382	15.5444	1.74e-54	3.58e-53
KCTD12	2770.3	2.86533	0.0918416	31.1986	1.11e-213	1.43e-211
CEBPA	5.41814	2.86051	1.10254	2.59448	0.00947339	0.0186015
PCDHAC1	96.0847	2.85977	0.314632	9.08925	9.97e-20	7.86e-19
LRRC74B	4.02901	2.85474	1.24203	2.29845	0.0215361	0.0391243
ATAD2	507.26	2.85171	0.131837	21.6305	9.27e-104	3.94e-102
BRCA1	214.303	2.85097	0.189858	15.0163	5.74e-51	1.1e-49
EMP2	474.712	2.84629	0.134544	21.1551	2.48e-99	1e-97
HMMR	131.713	2.84187	0.238306	11.9253	8.74e-33	1.08e-31
PDZRN3	1612.6	2.84117	0.0971733	29.2382	6.34e-188	6.61e-186
SAPCD2	40.0216	2.84073	0.407525	6.9707	3.15e-12	1.71e-11
TIMM23B-AGAP6	40.0454	2.83879	0.415811	6.82712	8.66e-12	4.58e-11
CYP24A1	6.73786	2.83394	1.05781	2.67907	0.00738278	0.0148096
SMIM10	27.7374	2.82058	0.498899	5.65361	1.57e-08	6.45e-08
EPB41L4A	63.0317	2.81864	0.339467	8.30312	1.01e-16	7.07e-16
COL16A1	2801.06	2.81738	0.0801597	35.1471	1.29e-270	2.42e-268
CDNF	19.6301	2.81548	0.594522	4.73571	2.18e-06	7.29e-06
OAS3	18.3841	2.81297	0.590319	4.76517	1.89e-06	6.35e-06
BCL3	285.688	2.81114	0.183465	15.3225	5.41e-53	1.08e-51
CDH1	10.3854	2.80756	0.794479	3.53383	0.000409577	0.00102805
SYNPO2L	17.0153	2.80707	0.618776	4.53649	5.72e-06	1.83e-05
CDCA5	231.849	2.80413	0.18324	15.303	7.3e-53	1.46e-51
TTK	172.75	2.8024	0.210585	13.3077	2.09e-40	3.25e-39
RIMKLA	20.7557	2.79882	0.612055	4.57282	4.81e-06	1.55e-05
NETO2	729.665	2.79691	0.113153	24.718	6.85e-135	4.09e-133
INA	417.375	2.79604	0.141514	19.758	6.85e-87	2.4e-85
ZNF454	7.79445	2.79505	0.935536	2.98764	0.00281139	0.00612864
POTEE	21.9671	2.79366	0.556881	5.01662	5.26e-07	1.88e-06
CDC25C	40.0492	2.79314	0.409743	6.81681	9.31e-12	4.91e-11
PAG1	303.191	2.79265	0.174119	16.0388	6.85e-58	1.53e-56
CENPM	56.8705	2.78879	0.380154	7.33593	2.2e-13	1.29e-12
BLM	96.8967	2.78721	0.281412	9.90436	3.99e-23	3.63e-22
SLC4A8	348.887	2.787	0.166769	16.7117	1.08e-62	2.62e-61
ZNF66	21.97	2.78683	0.579354	4.81024	1.51e-06	5.13e-06
CDK1	405.809	2.78044	0.14826	18.7538	1.8e-78	5.62e-77
GSE1	1037.58	2.77976	0.107174	25.9369	2.56e-148	1.8e-146
ANGPT2	7.69636	2.77746	0.91429	3.03783	0.00238287	0.00524471
MYO10	2351.88	2.77649	0.0921348	30.135	1.68e-199	1.94e-197
PTPRQ	15.3609	2.77147	0.651498	4.25399	2.1e-05	6.27e-05
SLC9A7	254.162	2.77081	0.16876	16.4186	1.41e-60	3.3e-59
MYO3A	11.5309	2.77034	0.76769	3.60867	0.00030777	0.000787677
KCTD19	10.2299	2.77026	0.794917	3.48496	0.000492207	0.00122273
SYTL4	92.9727	2.76756	0.271792	10.1826	2.37e-24	2.26e-23
GALNT7	1973.87	2.75968	0.0845174	32.6522	7.46e-234	1.06e-231
KIF20B	207.909	2.75846	0.186985	14.7523	2.97e-49	5.52e-48
KIF18A	175.944	2.75666	0.204495	13.4803	2.04e-41	3.26e-40
TENT5C	333.734	2.75408	0.158465	17.3797	1.18e-67	3.09e-66
MTFR2	26.528	2.75355	0.488271	5.6394	1.71e-08	6.98e-08
CDC20	319.812	2.75306	0.162809	16.9098	3.81e-64	9.55e-63
LY96	26.3047	2.74355	0.497152	5.51853	3.42e-08	1.36e-07
SEMA3D	118.943	2.74325	0.264404	10.3752	3.21e-25	3.15e-24
RFC3	227.306	2.7419	0.178225	15.3845	2.08e-53	4.2e-52
RMI2	79.1556	2.74008	0.300738	9.11118	8.15e-20	6.45e-19
C2	5.01247	2.73859	1.15081	2.37971	0.0173262	0.0322128
PARD6B	106.258	2.73799	0.250324	10.9378	7.6e-28	8.21e-27
KCNMA1	993.673	2.73307	0.102618	26.6336	2.77e-156	2.06e-154
SYT9	8.7004	2.73219	0.85748	3.18631	0.00144101	0.00330866
SH3TC2	87.2746	2.73215	0.271932	10.0472	9.45e-24	8.81e-23
PLD5	8.73494	2.73196	0.844654	3.23441	0.00121892	0.00283497
THEM5	6.22483	2.73112	1.02939	2.65315	0.00797454	0.0158783
CRB2	782.468	2.72939	0.117949	23.1404	1.82e-118	9.32e-117
ACTN2	132.726	2.72055	0.226996	11.985	4.26e-33	5.34e-32
CDCA8	192.595	2.71907	0.200888	13.5352	9.69e-42	1.56e-40
FGF7	196.492	2.71706	0.194894	13.9412	3.56e-44	6e-43
BUB1B	123.602	2.71613	0.231253	11.7453	7.47e-32	9.06e-31
FOXM1	178.654	2.71436	0.20943	12.9607	2.04e-38	3e-37
RAB20	65.2581	2.71278	0.332958	8.14751	3.71e-16	2.53e-15
ZNF107	122.994	2.70764	0.246343	10.9913	4.21e-28	4.58e-27
GAS2	34.2813	2.70607	0.431773	6.26735	3.67e-10	1.72e-09
STOM	1587.42	2.70326	0.0874273	30.9201	6.41e-210	7.97e-208
TLL1	1101.76	2.70196	0.107799	25.0648	1.2e-138	7.4e-137
PLK4	127.853	2.69483	0.249897	10.7838	4.11e-27	4.31e-26
CDH18	4.88543	2.69336	1.14606	2.3501	0.0187682	0.0345992
HCRTR1	4.80386	2.69039	1.1922	2.25666	0.0240291	0.0431461
DLGAP5	231.994	2.68749	0.215635	12.4632	1.19e-35	1.6e-34
MTUS1	57.045	2.6874	0.333284	8.0634	7.42e-16	5e-15
PI15	4.86379	2.68473	1.11671	2.40414	0.0162104	0.0303303
TMEM74B	7.24803	2.68241	0.925301	2.89896	0.00374404	0.0079641
SH3GL3	238.295	2.68171	0.172018	15.5897	8.56e-55	1.78e-53
CD24	2163.57	2.68045	0.0852415	31.4453	4.86e-217	6.5e-215
TGM2	8022.44	2.67872	0.0682019	39.2763	0	0
TROAP	116.854	2.67645	0.246045	10.8779	1.47e-27	1.57e-26
COL3A1	331707	2.67627	0.0627631	42.6408	0	0
GREB1L	268.861	2.67484	0.174373	15.3397	4.15e-53	8.32e-52
MLC1	10.7829	2.6747	0.791635	3.3787	0.000728296	0.0017563
C16orf74	9.59774	2.67359	0.873021	3.06246	0.00219529	0.00487487
ZNF385B	12.0581	2.66845	0.777321	3.43289	0.000597191	0.00146239
ARHGAP20	28.65	2.66832	0.514442	5.18683	2.14e-07	7.94e-07
SPON2	238.792	2.6675	0.174024	15.3283	4.95e-53	9.91e-52
SYBU	622.253	2.66141	0.119653	22.2427	1.33e-109	6.03e-108
SKP2	1706.08	2.66061	0.0870821	30.5529	5.18e-205	6.2e-203
ESRP2	11.9007	2.65946	0.716381	3.71236	0.000205339	0.00053901
SYTL5	499.669	2.65942	0.139696	19.0371	8.4e-81	2.72e-79
TPH1	9.65541	2.65872	0.845662	3.14396	0.0016668	0.00377983
GINS4	112.162	2.65699	0.245552	10.8205	2.75e-27	2.92e-26
KIAA2012	16.6699	2.65464	0.614103	4.32279	1.54e-05	4.66e-05
BDKRB2	60.673	2.65451	0.324869	8.17102	3.06e-16	2.09e-15
LRRC32	822.558	2.65025	0.109623	24.176	3.98e-129	2.25e-127
RIMBP3	8.30693	2.64934	0.888181	2.98289	0.00285545	0.00621797
EID3	5.96399	2.6433	1.0421	2.53651	0.0111962	0.0217048
PDE1A	4.74891	2.64077	1.13062	2.33568	0.0195078	0.0358116
GINS1	151.62	2.63593	0.215388	12.2381	1.95e-34	2.54e-33
CDH26	11.8517	2.63222	0.793164	3.31864	0.000904586	0.00214999
NEURL2	9.35895	2.63005	0.810667	3.24431	0.00117736	0.002747
IL33	15.2466	2.62976	0.635324	4.13924	3.48e-05	0.000101275
ICA1L	230.276	2.62918	0.184919	14.218	7.08e-46	1.23e-44
AMIGO2	3946.31	2.62815	0.0783539	33.542	1.18e-246	1.81e-244
ZDHHC14	244.351	2.62693	0.182143	14.4223	3.75e-47	6.7e-46
NUP210	84.1792	2.62624	0.274602	9.56379	1.14e-21	9.67e-21
AC068831.6	29.2911	2.62395	0.484644	5.41418	6.16e-08	2.41e-07
NCR3LG1	137.671	2.62347	0.234167	11.2034	3.92e-29	4.41e-28
METTL7A	99.0201	2.62126	0.257889	10.1643	2.86e-24	2.72e-23
ZBTB32	18.6106	2.61673	0.581972	4.49631	6.91e-06	2.19e-05
BIK	5.87106	2.61534	1.06707	2.45094	0.0142483	0.0269934
RAD51	127.825	2.61462	0.237314	11.0176	3.14e-28	3.43e-27
SPTBN2	3433.14	2.61067	0.0786823	33.1798	2.1e-241	3.15e-239
CCDC114	12.7818	2.60759	0.692274	3.76671	0.000165415	0.00044029
NTN3	19.8198	2.60755	0.590659	4.41465	1.01e-05	3.14e-05
TICRR	134.435	2.60702	0.258721	10.0766	7.01e-24	6.58e-23
PCSK5	645.696	2.60672	0.122473	21.2839	1.6e-100	6.54e-99
SLC38A4	24.3461	2.60526	0.507794	5.13056	2.89e-07	1.06e-06
SPOCK1	1350.32	2.60171	0.102157	25.4678	4.48e-143	2.9e-141
NIPAL4	153.303	2.60121	0.209291	12.4287	1.83e-35	2.45e-34
LCP1	60.9111	2.59993	0.352275	7.3804	1.58e-13	9.3e-13
STRA6	872.291	2.59728	0.108797	23.8727	5.88e-126	3.22e-124
TRERF1	210.906	2.59304	0.193663	13.3895	6.97e-41	1.1e-39
SNX10	52.7576	2.58972	0.349714	7.40525	1.31e-13	7.75e-13
DPP10	526.913	2.58847	0.125407	20.6406	1.19e-94	4.52e-93
SLC16A6	34.2369	2.58712	0.428476	6.03796	1.56e-09	6.95e-09
WDR72	20.6173	2.58692	0.551094	4.69415	2.68e-06	8.86e-06
KIF23	373.194	2.58563	0.150961	17.1278	9.2e-66	2.36e-64
KRT8	41217.3	2.5851	0.074595	34.6551	3.74e-263	6.5e-261
GINS2	188.224	2.58363	0.193082	13.381	7.81e-41	1.23e-39
REXO5	45.5151	2.58246	0.379477	6.80532	1.01e-11	5.3e-11
TMEM255A	175.126	2.57927	0.196345	13.1364	2.04e-39	3.1e-38
EGF	125.717	2.57906	0.25236	10.2198	1.62e-24	1.55e-23
ADGRE5	138.579	2.5788	0.226038	11.4087	3.78e-30	4.4e-29
ARHGAP40	19.2267	2.57863	0.593941	4.34155	1.41e-05	4.29e-05
ACRV1	5.7109	2.57737	1.05231	2.44925	0.0143154	0.0271142
HELLS	292.876	2.57373	0.160862	15.9996	1.29e-57	2.84e-56
CD74	116.462	2.5724	0.270805	9.49911	2.12e-21	1.78e-20
SGSM1	10.1653	2.57004	0.796546	3.22648	0.00125324	0.00290768
CA13	127.618	2.56895	0.228441	11.2456	2.44e-29	2.75e-28
WDR62	101.972	2.56803	0.260675	9.85148	6.75e-23	6.07e-22
ARHGDIG	12.4565	2.56477	0.710578	3.60941	0.000306897	0.000785568
RPS6KL1	24.9478	2.56353	0.521621	4.91455	8.9e-07	3.1e-06
TMEM35A	40.4638	2.5634	0.398661	6.43003	1.28e-10	6.2e-10
VWA5A	317.866	2.56156	0.155252	16.4993	3.71e-61	8.84e-60
NFKBIZ	1199.83	2.55838	0.103519	24.7142	7.53e-135	4.47e-133
SPATA25	40.406	2.55616	0.391533	6.5286	6.64e-11	3.3e-10
A2ML1	6.7729	2.55482	0.945381	2.70242	0.00688363	0.0139119
LMO4	3160.87	2.55471	0.0797526	32.0329	3.8e-225	5.16e-223
ATP8A1	81.667	2.55374	0.288691	8.84593	9.08e-19	6.92e-18
RAD54L	67.085	2.55222	0.321765	7.93196	2.16e-15	1.41e-14
PLCL2	61.3361	2.54949	0.330032	7.72496	1.12e-14	7.06e-14
MBOAT1	39.3454	2.54936	0.48054	5.30519	1.13e-07	4.3e-07
UBE2C	273.094	2.54737	0.166521	15.2976	7.94e-53	1.58e-51
MATN2	3100.02	2.54402	0.0833928	30.5065	2.14e-204	2.54e-202
COL6A1	23668.5	2.54163	0.0624223	40.7167	0	0
MELK	285.048	2.53547	0.157377	16.1109	2.14e-58	4.82e-57
KIF24	56.4111	2.53381	0.333098	7.60679	2.81e-14	1.73e-13
PGLYRP1	5.48869	2.52979	1.05666	2.39413	0.0166597	0.0310702
STXBP2	53.9553	2.52942	0.369839	6.83925	7.96e-12	4.22e-11
MATK	7.75132	2.52565	0.874197	2.88911	0.0038634	0.00819166
RIBC2	5.53594	2.52555	1.09081	2.31529	0.0205971	0.0376147
MCM5	513.343	2.525	0.138211	18.2691	1.46e-74	4.29e-73
TMEM37	47.3675	2.52465	0.370219	6.81935	9.15e-12	4.82e-11
FOLH1	9.88387	2.52438	0.800647	3.15292	0.00161645	0.00367743
CHST2	1647.79	2.51834	0.0991752	25.3928	3.03e-142	1.9e-140
SLC46A3	456.939	2.51822	0.133845	18.8144	5.76e-79	1.8e-77
MYOCD	229.137	2.51558	0.186689	13.4747	2.2e-41	3.51e-40
FAXDC2	376.613	2.51508	0.14494	17.3526	1.89e-67	4.92e-66
KCNS1	8.76014	2.51377	0.835079	3.01021	0.00261064	0.00571446
IL7	22.9073	2.51262	0.52494	4.7865	1.7e-06	5.74e-06
GTSE1	191.537	2.50772	0.199755	12.5539	3.78e-36	5.19e-35
RAD51AP1	134.681	2.50719	0.25408	9.86775	5.74e-23	5.19e-22
RELN	144.349	2.49701	0.212923	11.7273	9.24e-32	1.12e-30
PKIA	400.032	2.49661	0.142813	17.4817	1.98e-68	5.3e-67
RHOU	2730.58	2.49559	0.0803232	31.0694	6.24e-212	7.94e-210
CCDC80	37855.1	2.49433	0.067082	37.1832	1.27e-302	2.9e-300
SPDYE21	15.1957	2.49154	0.656761	3.79367	0.000148435	0.00039778
CLDN23	34.5972	2.49019	0.443976	5.60884	2.04e-08	8.27e-08
MYO5B	99.9442	2.48829	0.265891	9.3583	8.1e-21	6.67e-20
P2RY6	7.57922	2.48424	0.94229	2.63639	0.00837943	0.016617
SGO1	38.6984	2.48383	0.420038	5.91336	3.35e-09	1.46e-08
CEACAM1	12.9305	2.48091	0.688306	3.60438	0.000312902	0.000799671
FAM83D	110.345	2.48	0.247142	10.0347	1.07e-23	9.97e-23
ZNF695	5.44629	2.47952	1.09755	2.25914	0.0238744	0.0429017
NDRG2	478.964	2.47941	0.135069	18.3566	2.92e-75	8.73e-74
CDRT1	10.6658	2.47863	0.759228	3.26468	0.0010959	0.0025729
HAS3	19.43	2.47754	0.594814	4.16523	3.11e-05	9.11e-05
SCN7A	11.8074	2.47725	0.794667	3.11734	0.00182492	0.00411415
RIN2	1143.48	2.47722	0.101724	24.3523	5.49e-131	3.13e-129
SLFN13	111.958	2.47162	0.23825	10.3741	3.25e-25	3.19e-24
ADAMTS17	10.6514	2.47155	0.758137	3.26002	0.00111403	0.00261319
CACNA2D1	691.075	2.4683	0.12221	20.1973	1.03e-90	3.77e-89
CREB3L1	3331.18	2.46742	0.0918353	26.8678	5.22e-159	4.06e-157
CTSH	283.056	2.46734	0.175126	14.0889	4.44e-45	7.61e-44
SLC44A5	235.483	2.46497	0.172606	14.2809	2.88e-46	5.03e-45
S100A6	1078.47	2.46494	0.296776	8.30575	9.92e-17	6.92e-16
TSPAN15	215.122	2.46406	0.190677	12.9227	3.35e-38	4.9e-37
PMP22	3237.47	2.46338	0.087385	28.1899	7.77e-175	7.35e-173
LAMA1	2784.1	2.46222	0.088312	27.8809	4.55e-171	4.13e-169
RTL1	14.8981	2.44977	0.687133	3.5652	0.00036358	0.00091844
FANCA	201.404	2.44851	0.186402	13.1356	2.06e-39	3.13e-38
CENPA	50.6168	2.44656	0.361977	6.75889	1.39e-11	7.25e-11
CYB5A	712.88	2.4409	0.136336	17.9035	1.11e-71	3.12e-70
NPAS2	55.3163	2.43745	0.353831	6.88875	5.63e-12	3.01e-11
UHRF1	606.625	2.43722	0.120053	20.3013	1.25e-91	4.6e-90
DGKB	6.19904	2.4322	0.99839	2.43612	0.0148458	0.0280105
DBH	10.3701	2.43104	0.822881	2.95431	0.00313369	0.00676913
SCN8A	260.936	2.43085	0.176517	13.7712	3.8e-43	6.28e-42
BIRC5	292.429	2.43059	0.164825	14.7465	3.24e-49	6e-48
KIF4A	181.358	2.42949	0.19334	12.5659	3.25e-36	4.47e-35
MPL	6.30853	2.428	1.02966	2.35806	0.0183706	0.0339695
EFEMP1	1464.37	2.42751	0.0909549	26.6892	6.29e-157	4.71e-155
TYRP1	38.3522	2.42617	0.406872	5.96297	2.48e-09	1.09e-08
KIF2C	227.609	2.42526	0.176727	13.7232	7.38e-43	1.21e-41
DAPK1	1386.11	2.42358	0.0948681	25.5469	5.94e-144	3.92e-142
SCN2A	81.8252	2.42286	0.276465	8.76372	1.89e-18	1.41e-17
CNTFR	308.868	2.41291	0.160199	15.062	2.88e-51	5.58e-50
ANXA2R	22.6451	2.41167	0.516272	4.67132	2.99e-06	9.86e-06
SIGLEC15	10.2462	2.40934	0.766621	3.1428	0.00167339	0.00379424
DTX3L	241.805	2.40908	0.166541	14.4654	2e-47	3.6e-46
ZNF563	18.4878	2.40493	0.559082	4.30156	1.7e-05	5.11e-05
TNFRSF10C	70.7079	2.40146	0.317188	7.57108	3.7e-14	2.27e-13
ATXN7L2	286.363	2.39929	0.165713	14.4786	1.65e-47	2.98e-46
LYG2	7.19851	2.39626	0.926399	2.58664	0.00969173	0.0189933
SRPX2	302.443	2.39615	0.152117	15.752	6.65e-56	1.41e-54
DMKN	117.297	2.39576	0.242541	9.87778	5.2e-23	4.71e-22
PTGES	83.6272	2.39486	0.272308	8.79468	1.43e-18	1.08e-17
PDE5A	540.892	2.39061	0.13658	17.5034	1.35e-68	3.65e-67
NRP1	1879.78	2.3867	0.0888739	26.8549	7.39e-159	5.69e-157
SPINT1	292.943	2.38618	0.156306	15.266	1.29e-52	2.56e-51
MCOLN3	29.4788	2.38259	0.483984	4.92288	8.53e-07	2.98e-06
CCNB2	290.833	2.38222	0.155685	15.3016	7.46e-53	1.49e-51
CCNA2	323.148	2.38155	0.149526	15.9273	4.09e-57	8.94e-56
CDC42EP3	2188.57	2.38063	0.08666	27.4709	3.91e-166	3.34e-164
AC107871.1	21.5257	2.37993	0.606296	3.92536	8.66e-05	0.000238972
EEF1A2	293.076	2.37757	0.170648	13.9325	4.02e-44	6.76e-43
NLGN1	10.056	2.37413	0.752515	3.15493	0.00160534	0.00365431
CENPF	599.163	2.37236	0.141842	16.7254	8.56e-63	2.09e-61
PCLO	82.7661	2.37192	0.273244	8.68061	3.94e-18	2.91e-17
INHA	39.4826	2.37104	0.41496	5.71391	1.1e-08	4.59e-08
C1S	1229.39	2.36949	0.0971828	24.3818	2.67e-131	1.53e-129
CDKN3	74.1151	2.36345	0.287454	8.22203	2e-16	1.38e-15
AURKA	261.662	2.36336	0.160649	14.7114	5.45e-49	1e-47
LYSMD2	49.0263	2.36183	0.362325	6.51853	7.1e-11	3.51e-10
DUSP10	128.036	2.36099	0.22485	10.5003	8.61e-26	8.62e-25
EHHADH	65.0318	2.36062	0.307202	7.68425	1.54e-14	9.65e-14
SAXO1	7.06243	2.3591	0.937203	2.51717	0.0118302	0.0228543
HOXA6	22.981	2.35801	0.501566	4.70129	2.59e-06	8.58e-06
AC072022.2	22.045	2.35603	0.574235	4.10291	4.08e-05	0.000117435
CD55	831.444	2.34892	0.110014	21.351	3.81e-101	1.57e-99
RBP7	7.92296	2.34863	0.871146	2.69602	0.0070174	0.0141521
TRIM14	144.359	2.3485	0.225451	10.4169	2.08e-25	2.05e-24
NT5DC1	408.647	2.34489	0.132914	17.6422	1.17e-69	3.19e-68
KCNK1	231.949	2.34421	0.197531	11.8676	1.74e-32	2.15e-31
SCN2B	38.6382	2.34057	0.387049	6.04722	1.47e-09	6.58e-09
KIF22	345.631	2.34042	0.149005	15.707	1.36e-55	2.87e-54
HMGB2	1059.93	2.34026	0.101244	23.115	3.28e-118	1.68e-116
ASTN1	6.89693	2.33279	0.903843	2.58097	0.0098523	0.0192729
PLEKHG4	124.83	2.33135	0.232902	10.01	1.38e-23	1.28e-22
CSF2RA	28.4693	2.33066	0.453212	5.14254	2.71e-07	9.97e-07
FBXO24	8.88766	2.32954	0.810299	2.87491	0.00404139	0.00852924
KNTC1	382.091	2.32942	0.143585	16.2233	3.45e-59	7.91e-58
SAPCD1	7.93539	2.32622	0.891401	2.60962	0.00906423	0.0178654
FAM72B	34.2753	2.32364	0.435582	5.33457	9.58e-08	3.68e-07
GPC6	3181.15	2.32347	0.0846691	27.4417	8.72e-166	7.38e-164
SYTL1	102.795	2.31957	0.256229	9.05274	1.39e-19	1.09e-18
NPTX2	149.811	2.31922	0.216839	10.6956	1.07e-26	1.11e-25
LRRTM4	306.492	2.3184	0.154086	15.0461	3.66e-51	7.08e-50
PRELP	30.1882	2.31327	0.437947	5.28208	1.28e-07	4.85e-07
PCOLCE2	673.533	2.31326	0.111266	20.7904	5.29e-96	2.05e-94
SLFN11	29.0143	2.31217	0.476577	4.85163	1.22e-06	4.22e-06
PI4K2B	530.971	2.30906	0.130183	17.737	2.17e-70	6e-69
PLBD1	52.2922	2.30889	0.354501	6.51306	7.36e-11	3.64e-10
BMP4	1657.16	2.3085	0.0852467	27.0802	1.68e-161	1.33e-159
TPX2	1386.35	2.30478	0.0904182	25.4902	2.53e-143	1.64e-141
SPAG5	222.641	2.3041	0.171737	13.4164	4.85e-41	7.65e-40
SFTPD	29.9199	2.30387	0.458942	5.01996	5.17e-07	1.85e-06
NPBWR1	7.75772	2.30061	0.920694	2.49877	0.0124624	0.0239897
EPB41L5	687.839	2.29773	0.121361	18.933	6.1e-80	1.94e-78
GKN1	46.2492	2.2958	0.357116	6.42874	1.29e-10	6.25e-10
THEM4	646.856	2.29548	0.113359	20.2496	3.58e-91	1.31e-89
S100A1	21.1735	2.28972	0.524465	4.36583	1.27e-05	3.88e-05
PKD2L2	6.75769	2.28654	0.926216	2.46869	0.013561	0.0258337
CRTAC1	8.57894	2.28646	0.828668	2.7592	0.00579437	0.0118693
TSPAN5	1049.63	2.28644	0.105644	21.6429	7.09e-104	3.02e-102
ISM1	77.8177	2.28604	0.299183	7.64096	2.16e-14	1.34e-13
ANKRD18B	31.5476	2.28457	0.435089	5.25081	1.51e-07	5.72e-07
BANK1	48.689	2.28438	0.356182	6.41351	1.42e-10	6.89e-10
PRIM1	40.4454	2.2826	0.410719	5.55757	2.74e-08	1.1e-07
LRRC1	615.22	2.28095	0.123627	18.4502	5.19e-76	1.57e-74
ERV3-1	191.96	2.28081	0.233612	9.76324	1.62e-22	1.43e-21
KCNA2	38.0985	2.27759	0.500906	4.54694	5.44e-06	1.74e-05
NPTXR	369.789	2.27556	0.143492	15.8585	1.23e-56	2.66e-55
PDCD1LG2	22.0584	2.27435	0.554556	4.1012	4.11e-05	0.000118261
RIC3	41.0102	2.27204	0.378788	5.99817	2e-09	8.81e-09
FAM72D	14.2184	2.26643	0.666679	3.39958	0.000674889	0.00163728
NRXN3	299.249	2.26068	0.150428	15.0283	4.79e-51	9.24e-50
TRIML2	21.7248	2.25961	0.51156	4.4171	1e-05	3.1e-05
MCM4	831.499	2.25943	0.112407	20.1005	7.31e-90	2.63e-88
LPO	9.4021	2.25528	0.782563	2.88191	0.00395267	0.00836166
PLK1	279.409	2.25453	0.154516	14.5909	3.21e-48	5.86e-47
LBX2	14.1235	2.25279	0.691217	3.25916	0.00111743	0.00261964
GGT1	6.59427	2.24814	0.955303	2.35333	0.0186063	0.0343478
DNAH12	14.8884	2.24767	0.641164	3.50561	0.000455565	0.00113712
SERPINB1	270.117	2.24575	0.171081	13.1268	2.31e-39	3.5e-38
SLC16A10	8.47805	2.24478	0.883211	2.54161	0.0110343	0.021409
ADGRG6	803.115	2.24294	0.114739	19.5483	4.27e-85	1.46e-83
TBX18	215.013	2.24024	0.182936	12.246	1.76e-34	2.31e-33
AQP3	114.726	2.23861	0.229233	9.76564	1.58e-22	1.4e-21
PIMREG	80.9128	2.23823	0.296245	7.55533	4.18e-14	2.55e-13
WDR97	85.7218	2.234	0.260935	8.56152	1.11e-17	8.09e-17
TPBGL	20.4326	2.23331	0.548008	4.07532	4.6e-05	0.000131189
C3orf70	184.817	2.23218	0.189308	11.7913	4.33e-32	5.29e-31
KCNS3	26.1471	2.2314	0.486525	4.58641	4.51e-06	1.46e-05
NEURL1	38.1472	2.22475	0.405818	5.48214	4.2e-08	1.66e-07
SULT1E1	9.21435	2.22421	0.794946	2.79794	0.00514295	0.010621
S100A10	8183.43	2.22357	0.0973736	22.8355	2.04e-115	9.86e-114
MAD2L1	290.217	2.22293	0.152832	14.5449	6.29e-48	1.15e-46
KITLG	688.164	2.22236	0.108531	20.4767	3.47e-93	1.3e-91
VWA2	23.0187	2.21822	0.52775	4.20316	2.63e-05	7.77e-05
ZC3HAV1L	194.078	2.21435	0.204281	10.8398	2.23e-27	2.37e-26
CGREF1	73.7287	2.2143	0.293249	7.55093	4.32e-14	2.63e-13
CARNS1	103.835	2.21202	0.248092	8.91616	4.83e-19	3.71e-18
LMNB1	632.563	2.21137	0.113683	19.452	2.8e-84	9.47e-83
JAKMIP3	44.8368	2.20631	0.374786	5.88686	3.94e-09	1.7e-08
DIPK2A	747.403	2.20358	0.136249	16.1732	7.79e-59	1.77e-57
STIL	167.338	2.20258	0.198805	11.0791	1.58e-28	1.75e-27
ERP27	10.8919	2.20234	0.733314	3.00328	0.00267089	0.00583805
NUF2	98.7322	2.20032	0.250166	8.79545	1.42e-18	1.08e-17
DOC2A	8.25283	2.19829	0.879303	2.50004	0.012418	0.0239099
FAM81A	11.8198	2.19246	0.696199	3.14919	0.00163723	0.00371904
POTEF	78.3115	2.19158	0.303592	7.21884	5.24e-13	3.01e-12
PLSCR4	50.6204	2.18889	0.350632	6.24271	4.3e-10	2e-09
SLC43A2	604.552	2.18742	0.11678	18.7312	2.76e-78	8.58e-77
MECOM	23.7037	2.18317	0.540954	4.03577	5.44e-05	0.000153827
MANEAL	7.15644	2.18289	0.955426	2.28473	0.0223287	0.0403575
HS3ST5	24.3962	2.18267	0.482605	4.52268	6.11e-06	1.94e-05
CLDND2	8.04572	2.18017	0.874562	2.49287	0.0126714	0.0243602
CENPI	154.331	2.18001	0.20462	10.654	1.67e-26	1.72e-25
COL6A3	21512.8	2.17922	0.0892821	24.4082	1.4e-131	8.07e-130
PCDHA3	15.3488	2.17638	0.639131	3.40521	0.000661127	0.00160751
CDT1	133.739	2.17378	0.228628	9.50794	1.94e-21	1.64e-20
SEMA3A	661.496	2.17318	0.117619	18.4765	3.19e-76	9.7e-75
HS3ST4	78.1299	2.17233	0.271307	8.00693	1.18e-15	7.82e-15
DCN	8540.83	2.16681	0.0712834	30.3971	6.01e-203	7.09e-201
PCDHA8	8.95853	2.16644	0.790326	2.7412	0.00612155	0.0124778
FUT8	484.944	2.16581	0.12862	16.8388	1.27e-63	3.15e-62
SPINT2	549.797	2.16435	0.121717	17.7818	9.77e-71	2.72e-69
C1QTNF1	71.6464	2.16384	0.301799	7.16982	7.51e-13	4.25e-12
PCDHB8	25.0282	2.16238	0.518441	4.17093	3.03e-05	8.9e-05
ENPP1	163.923	2.16116	0.199712	10.8214	2.73e-27	2.89e-26
ZNF730	31.1339	2.16017	0.464323	4.65229	3.28e-06	1.08e-05
TENM1	139.409	2.15898	0.212221	10.1733	2.61e-24	2.48e-23
LDHA	5158.19	2.15886	0.0689372	31.3164	2.79e-215	3.64e-213
SQOR	11.616	2.15826	0.723579	2.98276	0.00285661	0.00621966
ADAMTS5	266.787	2.15811	0.160694	13.4299	4.04e-41	6.4e-40
LDLRAD2	15.1327	2.15438	0.597488	3.60572	0.000311283	0.000795912
APOBEC3F	155.744	2.14879	0.201851	10.6454	1.83e-26	1.87e-25
KLHL3	106.609	2.14864	0.276481	7.77139	7.76e-15	4.94e-14
TLCD4	142.513	2.14399	0.208439	10.2859	8.16e-25	7.89e-24
GPR17	54.3587	2.14381	0.379172	5.65393	1.57e-08	6.44e-08
RASSF5	25.6119	2.14252	0.495173	4.32682	1.51e-05	4.58e-05
DLK2	44.9776	2.14236	0.37328	5.73929	9.51e-09	3.99e-08
CYP2E1	10.5998	2.14038	0.734051	2.91585	0.00354726	0.00758845
H2BC4	66.766	2.13941	0.307035	6.96798	3.22e-12	1.75e-11
UACA	3166.26	2.13756	0.0937413	22.8028	4.31e-115	2.07e-113
PYCARD	7.07157	2.13624	0.887781	2.40627	0.0161163	0.0301786
SLC22A5	266.516	2.13469	0.166886	12.7913	1.83e-37	2.62e-36
SLC26A1	51.7475	2.13086	0.342827	6.21556	5.11e-10	2.37e-09
ANKRD24	50.05	2.12821	0.336418	6.3261	2.51e-10	1.19e-09
AP1S3	125.99	2.12727	0.221837	9.58936	8.86e-22	7.6e-21
ABTB2	333.627	2.12522	0.147899	14.3693	8.06e-47	1.43e-45
ACSM3	53.4311	2.12507	0.366073	5.80505	6.43e-09	2.73e-08
FRRS1	95.7942	2.12193	0.262792	8.07456	6.77e-16	4.58e-15
NUTM2E	7.06403	2.1208	0.91815	2.30987	0.0208956	0.0381038
CNTN5	52.263	2.1198	0.351581	6.02933	1.65e-09	7.32e-09
C5orf34	51.3675	2.11374	0.33636	6.28415	3.3e-10	1.55e-09
NUTM2A	8.744	2.11219	0.817817	2.58271	0.00980271	0.0191898
NAAA	159.697	2.11176	0.197854	10.6733	1.36e-26	1.4e-25
SLC8A2	19.1285	2.11176	0.571117	3.69759	0.000217655	0.000569121
DENND3	360.845	2.11024	0.139234	15.1561	6.91e-52	1.35e-50
F11R	176.059	2.10996	0.194692	10.8374	2.29e-27	2.43e-26
CD14	11.2472	2.10926	0.691067	3.05218	0.00227185	0.00502363
SGO2	164.808	2.1083	0.197886	10.6541	1.67e-26	1.71e-25
PPL	220.071	2.1079	0.169084	12.4666	1.14e-35	1.54e-34
ARHGEF19	194.037	2.10737	0.180229	11.6927	1.39e-31	1.67e-30
ZNF850	88.9655	2.10701	0.262082	8.0395	9.02e-16	6.04e-15
CRABP2	2391.12	2.10627	0.0825124	25.5267	9.97e-144	6.53e-142
ATP2B4	4184.4	2.10499	0.104264	20.189	1.22e-90	4.44e-89
CACNA1A	77.9597	2.1036	0.299326	7.0278	2.1e-12	1.16e-11
TLR5	8.77633	2.10267	0.87435	2.40484	0.0161794	0.0302758
RESF1	546.937	2.09993	0.123349	17.0244	5.42e-65	1.37e-63
GEN1	317.066	2.09593	0.163787	12.7967	1.71e-37	2.45e-36
FES	70.3372	2.09454	0.293659	7.13254	9.85e-13	5.53e-12
CLEC3A	74.8822	2.094	0.287638	7.27999	3.34e-13	1.94e-12
MERTK	273.589	2.09392	0.155079	13.5022	1.52e-41	2.43e-40
CARMIL1	628.345	2.09386	0.118274	17.7034	3.95e-70	1.08e-68
ZNF799	16.3819	2.09372	0.586919	3.56731	0.000360659	0.000911488
LDB2	59.3006	2.09316	0.364495	5.74264	9.32e-09	3.91e-08
FLNB	14814.6	2.09273	0.0769651	27.1906	8.38e-163	6.84e-161
TRIP13	258.563	2.09252	0.160522	13.0357	7.66e-39	1.14e-37
PTCH1	416.379	2.09103	0.135918	15.3844	2.08e-53	4.2e-52
PRPH2	77.1717	2.09087	0.275783	7.5816	3.41e-14	2.1e-13
B3GNT2	581.756	2.09036	0.117995	17.7157	3.17e-70	8.73e-69
NEK2	79.82	2.0899	0.279231	7.4845	7.18e-14	4.31e-13
PLCB2	55.833	2.08971	0.363185	5.75385	8.72e-09	3.67e-08
SPR	130.267	2.08909	0.219294	9.52646	1.63e-21	1.37e-20
NLGN4Y	677.407	2.08687	0.128558	16.2329	2.95e-59	6.77e-58
APOBEC3C	487.131	2.08541	0.126367	16.5027	3.51e-61	8.37e-60
TFRC	3794.56	2.08478	0.0822444	25.3486	9.31e-142	5.83e-140
TUBB4A	18.0052	2.08444	0.595864	3.49818	0.000468438	0.00116673
CDKN2C	53.2215	2.08423	0.355179	5.86812	4.41e-09	1.89e-08
SVEP1	699.404	2.08419	0.126149	16.5217	2.56e-61	6.14e-60
EME1	72.5541	2.0818	0.281757	7.38865	1.48e-13	8.76e-13
PDE6B	59.5153	2.0806	0.317773	6.54744	5.85e-11	2.92e-10
GFPT2	2508.13	2.07896	0.0790733	26.2915	2.4e-152	1.73e-150
HROB	58.8414	2.07874	0.310225	6.70073	2.07e-11	1.07e-10
UPB1	11.0504	2.07676	0.857575	2.42167	0.0154494	0.029035
GDF9	11.9448	2.07585	0.672242	3.08795	0.00201545	0.00450127
REV3L	664.87	2.07454	0.146829	14.1289	2.52e-45	4.34e-44
CRACR2A	24.5615	2.07149	0.476723	4.34526	1.39e-05	4.22e-05
ECT2	329.577	2.06968	0.149229	13.8692	9.74e-44	1.62e-42
FTCD	39.7518	2.06882	0.373167	5.54396	2.96e-08	1.18e-07
ANKDD1B	13.6137	2.0681	0.639511	3.23387	0.00122124	0.00283955
CLUL1	37.985	2.06731	0.394325	5.24265	1.58e-07	5.97e-07
KCNIP2	72.6932	2.06565	0.286732	7.20411	5.84e-13	3.33e-12
MXRA5	5167.5	2.06249	0.0957919	21.5309	8e-103	3.35e-101
ANO5	111.519	2.06222	0.227721	9.05588	1.35e-19	1.06e-18
FAM149A	65.0098	2.05702	0.303759	6.77189	1.27e-11	6.63e-11
MMS22L	271.51	2.0553	0.157172	13.0768	4.47e-39	6.72e-38
SCGB2B2	9.16886	2.05414	0.830351	2.47383	0.0133674	0.025513
ETS2	487.441	2.05405	0.122698	16.7407	6.62e-63	1.62e-61
SLC16A8	37.9545	2.05297	0.410878	4.99654	5.84e-07	2.08e-06
NID1	6045.63	2.05258	0.0831112	24.6967	1.16e-134	6.86e-133
AUNIP	44.6414	2.05172	0.365552	5.61267	1.99e-08	8.1e-08
LMCD1	4837.45	2.05112	0.0807724	25.3939	2.95e-142	1.86e-140
ZNF273	59.9923	2.04905	0.360039	5.6912	1.26e-08	5.2e-08
FGFR2	3502.48	2.04765	0.0787307	26.0083	3.99e-149	2.83e-147
ARHGAP11A	73.521	2.04407	0.278704	7.33421	2.23e-13	1.3e-12
APOL3	6.66008	2.04286	0.929248	2.1984	0.0279207	0.0495224
NHLH2	23.3348	2.0427	0.482565	4.233	2.31e-05	6.86e-05
C5AR1	66.1939	2.04077	0.309086	6.60259	4.04e-11	2.04e-10
TMEM132E	14.2209	2.03996	0.626185	3.25777	0.00112293	0.00263065
MAST4	407.167	2.03856	0.140837	14.4746	1.75e-47	3.16e-46
GNAI1	2036.08	2.03701	0.0878064	23.1988	4.68e-119	2.41e-117
PKP3	17.4582	2.03678	0.554646	3.67221	0.000240461	0.00062471
FAM72C	10.0234	2.03362	0.785144	2.59012	0.00959418	0.0188204
ADRB2	8.31196	2.03199	0.833146	2.43894	0.0147303	0.0278182
ADORA2B	257.098	2.03099	0.169583	11.9764	4.73e-33	5.92e-32
TACC3	474	2.03075	0.128864	15.7589	5.97e-56	1.27e-54
BAG2	783.871	2.0287	0.111904	18.1289	1.88e-73	5.46e-72
ZNF724	9.91229	2.02789	0.735343	2.75775	0.00582014	0.0119191
PASK	145.712	2.02688	0.208646	9.71448	2.62e-22	2.3e-21
ECM2	19.0474	2.02307	0.538383	3.75768	0.000171494	0.000455045
IL1R1	2046.27	2.02143	0.081079	24.9316	3.38e-137	2.05e-135
ZNF469	813.977	2.02019	0.112881	17.8965	1.25e-71	3.52e-70
B4GALT6	271.365	2.01959	0.169675	11.9027	1.15e-32	1.42e-31
PCDHA2	50.4292	2.01881	0.344501	5.86009	4.63e-09	1.98e-08
PTP4A1	11.5651	2.01812	0.71465	2.82393	0.00474386	0.00987001
GRIP2	14.0029	2.01667	0.68958	2.9245	0.00345015	0.00739835
MAP3K21	87.2863	2.01632	0.26826	7.51628	5.64e-14	3.41e-13
ZNF714	305.987	2.01326	0.154968	12.9914	1.37e-38	2.03e-37
CD44	1299.82	2.01324	0.0929284	21.6645	4.44e-104	1.9e-102
MCM2	400.403	2.01286	0.140149	14.3622	8.93e-47	1.58e-45
REL	51.6711	2.01143	0.367392	5.4749	4.38e-08	1.73e-07
MARVELD2	23.7667	2.00758	0.48817	4.11246	3.91e-05	0.000112979
B3GNT9	235.866	2.00669	0.177591	11.2995	1.32e-29	1.5e-28
SLC25A21	11.4469	2.00358	0.70493	2.84224	0.00447982	0.00936405
RBL1	144.986	2.00292	0.211786	9.45728	3.16e-21	2.64e-20
WIPF3	16.4537	2.0028	0.605765	3.30624	0.000945572	0.00224114
